# Supplementary material for: Impact of model structure on flow simulation and hydrologicalrealism: from lumped to semi-distributed approach
Source: Copernicus journal article supplement (doi:10.5194/hess-2017-82), 2017-02-22

## S1 Catchments features

This section details the dataset of the 50 catchments. Figure S1 shows the localization of the studied catchments. The catchments IDs are highlighted in figure S1. Table S1 presents the main features of the catchments dataset, including name, geographical position, area, elevation range, slope, annual P, annual PET, annual Q, time step, modeling periods P1 and P2.

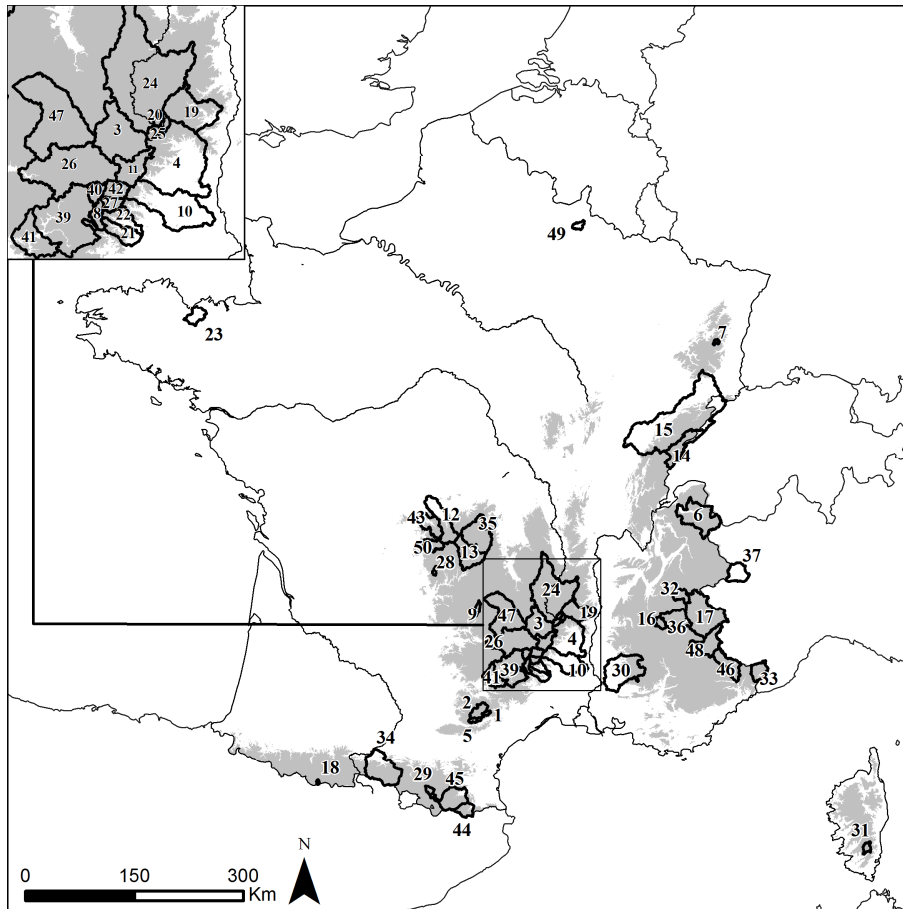

**Figure S1:** Localization of studied catchment, the catchment IDs are highlighted.

**Table S1** : Main features of the 50 catchments, including name, geographical position, area, elevation range, slope, annual P, annual PET, annual Q, time step, modeling periods P1 anP2.

| ID | BV                      | Xe [m]  | Ye [m]  | Surface [km <sup>2</sup> ] | Latitude [degree] | Zmin [m] | Z50 [m] | Zmax [m] | Slope [degree] | Annual_P [mm] | Annual_ETP [mm] | Annual_Q [mm] | Time step [hour] | Modelling Period 1 | Modelling Period 2 | Mountain region |
|----|-------------------------|---------|---------|----------------------------|-------------------|----------|---------|----------|----------------|---------------|-----------------|---------------|------------------|--------------------|--------------------|-----------------|
| 1  | Agout@Fraise            | 637989  | 1845758 | 46.8                       | 43.4              | 793      | 999     | 1149     | 5.05           | 1573          | 660             | 1073          | 24               | 1973 - 1981        | 1981 - 1988        | Massif Central  |
| 2  | Agout@LaRaviege         | 621096  | 1843766 | 370.8                      | 43.6              | 659      | 904     | 1259     | 6.37           | 1510          | 657             | 969           | 24               | 1973 - 1980        | 1980 - 1987        | Massif Central  |
| 3  | Allier@Poutes           | 705537  | 1994942 | 1016.1                     | 46.5              | 659      | 1146    | 1528     | 5.41           | 1046          | 604             | 496           | 24               | 1988 - 1996        | 1996 - 2004        | Massif Central  |
| 4  | Ardeche@Sauze           | 776846  | 1926227 | 2266.5                     | 44.1              | 49       | 599     | 1671     | 9.51           | 1574          | 757             | 838           | 24               | 1961 - 1985        | 1985 - 2008        | Massif Central  |
| 5  | Arn@Taillasses          | 619482  | 1836883 | 82.4                       | 43.5              | 681      | 880     | 1054     | 4.08           | 1630          | 683             | 1045          | 24               | 1987 - 1997        | 1997 - 2007        | Massif Central  |
| 6  | Arve@Arthaz             | 904338  | 2135177 | 1638.2                     | 46.2              | 433      | 1504    | 4800     | 19.61          | 1552          | 569             | 1438          | 24               | 1986 - 1993        | 1993 - 2000        | Alps            |
| 7  | Behine@LaPoutroie       | 953246  | 2358462 | 38.4                       | 48.2              | 406      | 856     | 1215     | 12.58          | 1316          | 611             | 805           | 24               | 1984 - 1989        | 1989 - 1993        | Vosges          |
| 8  | Breze@Meyrueis          | 688063  | 1909099 | 33.7                       | 44.0              | 703      | 1075    | 1544     | 13.41          | 1444          | 622             | 843           | 24               | 1985 - 1996        | 1996 - 2006        | Massif Central  |
| 9  | Bromme@Brommat          | 627263  | 1980786 | 106.3                      | 44.8              | 660      | 978     | 1610     | 5.70           | 1422          | 696             | 972           | 24               | 1989 - 1995        | 1995 - 2000        | Massif Central  |
| 10 | Ceze@Bagnols            | 782869  | 1910402 | 1119.2                     | 44.1              | 45       | 329     | 1589     | 6.21           | 1330          | 819             | 564           | 24               | 1994 - 1999        | 1999 - 2004        | Massif Central  |
| 11 | Chassezac@SteMarguerite | 731606  | 1942481 | 414.1                      | 44.3              | 329      | 1055    | 1671     | 11.03          | 1611          | 580             | 1094          | 24               | 1968 - 1987        | 1987 - 2006        | Massif Central  |
| 12 | Creuse@Age              | 559016  | 2144605 | 1121.8                     | 46.0              | 266      | 553     | 948      | 3.57           | 1072          | 650             | 416           | 24               | 1960 - 1983        | 1983 - 2005        | Massif Central  |
| 13 | Dordogne@Bort           | 612697  | 2046020 | 1012.6                     | 45.4              | 528      | 836     | 1774     | 4.15           | 1327          | 621             | 724           | 24               | 1979 - 1992        | 1992 - 2005        | Massif Central  |
| 14 | Doubs@Brenet            | 931797  | 2240815 | 941.0                      | 47.4              | 768      | 1000    | 1438     | 5.09           | 1445          | 698             | 822           | 24               | 1962 - 1983        | 1983 - 2004        | Jura            |
| 15 | Doubs@Neublans          | 829420  | 2218279 | 7366.2                     | 46.9              | 184      | 580     | 1438     | 4.55           | 1422          | 632             | 764           | 24               | 1967 - 1984        | 1984 - 2001        | Jura            |
| 16 | Drac@Sautet             | 882507  | 1985816 | 990.6                      | 44.5              | 780      | 1742    | 3512     | 20.84          | 1421          | 579             | 1049          | 24               | 1969 - 1984        | 1984 - 1999        | Alps            |
| 17 | Durance@Clapiere        | 930627  | 1959457 | 2174.2                     | 44.6              | 790      | 2113    | 3980     | 21.56          | 1159          | 444             | 725           | 24               | 1982 - 1994        | 1994 - 2005        | Alps            |
| 18 | Eyrieux@Pontpierre      | 785116  | 1983533 | 770.1                      | 44.8              | 141      | 797     | 1710     | 10.98          | 1325          | 711             | 625           | 24               | 1998 - 2006        | 2006 - 2013        | Massif Central  |
| 19 | Gage@Gagell             | 739315  | 1979094 | 42.4                       | 44.5              | 1011     | 1254    | 1592     | 6.36           | 1506          | 586             | 1107          | 6                | 1992 - 1999        | 1999 - 2005        | Massif Central  |
| 20 | Gardon@Corbes           | 730274  | 1898530 | 262.3                      | 44.1              | 145      | 531     | 1181     | 12.02          | 1369          | 729             | 801           | 8                | 1986 - 1997        | 1997 - 2007        | Massif Central  |
| 21 | Gardon@Generargues      | 730935  | 1898983 | 245.2                      | 44.1              | 166      | 562     | 1124     | 12.81          | 1372          | 770             | 752           | 8                | 1986 - 1997        | 1997 - 2008        | Massif Central  |
| 22 | GaveEstaubee@Gloriettes | 412443  | 1752747 | 20.2                       | 42.4              | 1648     | 2192    | 2849     | 25.87          | 2001          | 673             | 1635          | 12               | 1987 - 1997        | 1997 - 2006        | Pyrenees        |
| 23 | Goussant@PontRolland    | 233822  | 2402559 | 422.5                      | 48.5              | 31       | 109     | 338      | 1.54           | 824           | 685             | 224           | 24               | 1993 - 1999        | 1999 - 2004        | Britanny region |
| 24 | Loire@Basset            | 739771  | 2034325 | 3261.8                     | 45.3              | 446      | 965     | 1701     | 5.49           | 993           | 731             | 419           | 24               | 1956 - 1983        | 1983 - 2010        | Massif Central  |
| 25 | Loire@LaPalisse         | 738771  | 1977633 | 130.9                      | 44.5              | 1003     | 1245    | 1570     | 6.02           | 1778          | 585             | 1398          | 6                | 1992 - 1998        | 1998 - 2004        | Massif Central  |
| 26 | Lot@Castelnau           | 642336  | 1945506 | 1628.2                     | 44.3              | 416      | 981     | 1700     | 7.24           | 1042          | 629             | 457           | 24               | 1982 - 1994        | 1994 - 2005        | Massif Central  |
| 27 | Mimente@Florac          | 701260  | 1924715 | 126.1                      | 44.0              | 559      | 933     | 1409     | 11.09          | 1453          | 650             | 840           | 24               | 1985 - 1996        | 1996 - 2006        | Massif Central  |
| 28 | Montane@Eyrein          | 568891  | 2038403 | 43.2                       | 45.3              | 553      | 624     | 803      | 3.09           | 1497          | 662             | 931           | 24               | 1958 - 1979        | 1979 - 1999        | Massif Central  |
| 29 | Oriege@Campauheil       | 560272  | 1745078 | 89.4                       | 42.7              | 828      | 1829    | 2748     | 24.50          | 1928          | 479             | 1522          | 24               | 1960 - 1971        | 1971 - 1982        | Pyrenees        |
| 30 | Ouveze@Bedarrides       | 805366  | 1896400 | 1841.9                     | 44.2              | 25       | 510     | 1895     | 6.70           | 868           | 798             | 364           | 24               | 1996 - 2000        | 2000 - 2004        | Alps            |
| 31 | Rizzanese@Barrage       | 1165253 | 1660880 | 116.2                      | 41.6              | 554      | 1086    | 2028     | 11.92          | 1309          | 892             | 778           | 6                | 1993 - 2000        | 2000 - 2007        | Corsica island  |
| 32 | Romanche@Chambon        | 899366  | 2012160 | 256.6                      | 45.2              | 1063     | 2365    | 3797     | 24.19          | 1468          | 427             | 1020          | 24               | 1985 - 1995        | 1995 - 2005        | Alps            |
| 33 | Roya@Breil              | 1015841 | 1895339 | 444.4                      | 43.5              | 316      | 1475    | 2893     | 21.48          | 1307          | 650             | 776           | 24               | 1987 - 1996        | 1996 - 2005        | Alps            |
| 34 | Salat@Roquefort         | 488576  | 1795992 | 1580.2                     | 42.9              | 269      | 982     | 2807     | 15.43          | 1468          | 713             | 786           | 24               | 1993 - 1998        | 1998 - 2003        | Pyrenees        |
| 35 | Sioule@Fades            | 635772  | 2108190 | 1290.6                     | 45.9              | 508      | 778     | 1508     | 3.52           | 1101          | 727             | 435           | 24               | 1956 - 1982        | 1982 - 2008        | Massif Central  |
| 36 | Souloise@Infernet       | 882093  | 1980560 | 163.0                      | 44.8              | 854      | 1685    | 2737     | 16.94          | 1636          | 677             | 1224          | 24               | 1991 - 1999        | 1999 - 2006        | Alps            |
| 37 | Stura@Lanzo             | 1003561 | 2042987 | 579.2                      | 45.1              | 462      | 1785    | 3625     | 22.98          | 1497          | 478             | 1080          | 24               | 1954 - 1963        | 1963 - 1972        | Alps            |
| 38 | Tarn@Cocures            | 702310  | 1927978 | 189.4                      | 44.0              | 583      | 1192    | 1697     | 9.11           | 1482          | 627             | 962           | 24               | 1985 - 1996        | 1996 - 2006        | Massif Central  |
| 39 | Tarn@Millau             | 658957  | 1899147 | 2085.7                     | 44.0              | 349      | 896     | 1697     | 8.69           | 1213          | 642             | 630           | 24               | 1980 - 1995        | 1995 - 2010        | Massif Central  |
| 40 | Tarn@Montbrun           | 692563  | 1926599 | 588.6                      | 44.0              | 487      | 1017    | 1700     | 10.55          | 1353          | 619             | 861           | 24               | 1985 - 1996        | 1996 - 2006        | Massif Central  |
| 41 | Tarn@Pinet              | 637927  | 1896585 | 2624.6                     | 44.0              | 315      | 848     | 1697     | 8.29           | 1201          | 615             | 598           | 24               | 1980 - 1988        | 1988 - 1995        | Massif Central  |
| 42 | Tarnon@Florac           | 700826  | 1924522 | 133.1                      | 44.0              | 557      | 980     | 1550     | 11.74          | 1392          | 620             | 813           | 24               | 1985 - 1996        | 1996 - 2006        | Massif Central  |
| 43 | Taurion@RocheTalamie    | 544532  | 2112334 | 654.1                      | 46.0              | 379      | 562     | 883      | 3.40           | 1335          | 700             | 670           | 24               | 1957 - 1980        | 1980 - 2002        | Massif Central  |
| 44 | Tech@Reynes             | 627165  | 1718867 | 346.0                      | 42.5              | 225      | 1132    | 2696     | 16.04          | 1097          | 685             | 518           | 24               | 1971 - 1978        | 1978 - 1985        | Pyrenees        |
| 45 | Tet@Vinca               | 569847  | 1734866 | 946.2                      | 42.6              | 235      | 1394    | 2823     | 16.35          | 827           | 682             | 365           | 24               | 1982 - 1994        | 1994 - 2006        | Pyrenees        |
| 46 | Tinee@PontLune          | 988003  | 1893796 | 707.0                      | 44.2              | 317      | 1750    | 2998     | 22.45          | 1260          | 563             | 643           | 24               | 1981 - 1992        | 1992 - 2002        | Alps            |
| 47 | Truyere@Grandval        | 658325  | 1991594 | 1788.8                     | 44.5              | 723      | 1061    | 1500     | 4.07           | 997           | 581             | 454           | 24               | 1973 - 1990        | 1990 - 2006        | Massif Central  |
| 48 | Ubaye@RocheRousse       | 923493  | 1947189 | 946.6                      | 44.4              | 804      | 2086    | 3317     | 20.78          | 1098          | 447             | 671           | 24               | 1982 - 1994        | 1994 - 2005        | Alps            |
| 49 | Vence@Francheville      | 771573  | 2528249 | 125.6                      | 49.4              | 152      | 219     | 335      | 3.04           | 1022          | 653             | 577           | 24               | 1974 - 1985        | 1985 - 1995        | Ardenne region  |
| 50 | Vienne@Bussy            | 552421  | 2082789 | 379.2                      | 46.9              | 407      | 691     | 951      | 4.64           | 1328          | 713             | 755           | 24               | 1983 - 1995        | 1995 - 2006        | Massif Central  |

## **S2 Model comparison over calibration periods**

This section details the performance of MORDOR V0, V1 and V2 over the calibration periods P1 and P2. For the three considered models, tables S2 and S3 show the values of the individual associated calibration metrics (KGE(Q), KGE(Qsea) and KGE(FDC)) for all the catchments over the calibration period P1 (table S2) and the calibration period P2 (table S3). The following figures show, for the 50 catchments, the observed hydrograph (year by year) and those modeled by MORDOR V0, V1 and SD (calibration mode).

**Table S2:** The values of the individual associated calibration metrics (KGE(Q), KGE(Qsea) and KGE(FDC)) for MORDOR V0, V1 and SD for all the catchments over the period P1

| ID | BV                      | MORDOR V0 |           |          | MORDOR V1 |           |          | MORDOR SD |           |          |
|----|-------------------------|-----------|-----------|----------|-----------|-----------|----------|-----------|-----------|----------|
|    |                         | KGE(Q)    | KGE(Qsea) | KGE(FDC) | KGE(Q)    | KGE(Qsea) | KGE(FDC) | KGE(Q)    | KGE(Qsea) | KGE(FDC) |
| 1  | Agout@Fraise            | 0.948     | 0.995     | 0.898    | 0.963     | 0.991     | 0.914    | 0.955     | 0.974     | 0.900    |
| 2  | Agout@LaRaviege         | 0.911     | 0.978     | 0.953    | 0.910     | 0.973     | 0.950    | 0.906     | 0.969     | 0.954    |
| 3  | Allier@Poutes           | 0.960     | 0.889     | 0.925    | 0.969     | 0.885     | 0.939    | 0.960     | 0.881     | 0.941    |
| 4  | Ardeche@Sauze           | 0.928     | 0.958     | 0.924    | 0.951     | 0.964     | 0.923    | 0.948     | 0.964     | 0.922    |
| 5  | Arn@Taillades           | 0.885     | 0.938     | 0.987    | 0.909     | 0.944     | 0.989    | 0.923     | 0.938     | 0.989    |
| 6  | Arve@Arthaz             | 0.984     | 0.817     | 0.918    | 0.991     | 0.812     | 0.926    | 0.981     | 0.792     | 0.929    |
| 7  | Behine@LaPoutroie       | 0.961     | 0.962     | 0.903    | 0.957     | 0.965     | 0.882    | 0.954     | 0.939     | 0.908    |
| 8  | Breze@Meyrueis          | 0.879     | 0.926     | 0.984    | 0.847     | 0.943     | 0.983    | 0.853     | 0.939     | 0.984    |
| 9  | Bromme@Brommat          | 0.984     | 0.841     | 0.943    | 0.985     | 0.880     | 0.940    | 0.986     | 0.883     | 0.939    |
| 10 | Ceze@Bagnols            | 0.947     | 0.943     | 0.887    | 0.954     | 0.917     | 0.892    | 0.959     | 0.940     | 0.880    |
| 11 | Chassezac@SteMarguerite | 0.903     | 0.939     | 0.959    | 0.924     | 0.944     | 0.956    | 0.911     | 0.950     | 0.957    |
| 12 | Creuse@Age              | 0.980     | 0.888     | 0.946    | 0.983     | 0.901     | 0.948    | 0.984     | 0.896     | 0.944    |
| 13 | Dordogne@Bort           | 0.913     | 0.924     | 0.889    | 0.926     | 0.929     | 0.879    | 0.934     | 0.927     | 0.868    |
| 14 | Doubs@Brenet            | 0.874     | 0.909     | 0.976    | 0.901     | 0.910     | 0.985    | 0.874     | 0.920     | 0.981    |
| 15 | Doubs@Neublans          | 0.974     | 0.898     | 0.962    | 0.981     | 0.874     | 0.967    | 0.981     | 0.895     | 0.966    |
| 16 | Drac@Sautet             | 0.940     | 0.974     | 0.916    | 0.927     | 0.956     | 0.901    | 0.933     | 0.985     | 0.899    |
| 17 | Durance@Clapiere        | 0.900     | 0.926     | 0.975    | 0.895     | 0.933     | 0.983    | 0.903     | 0.939     | 0.981    |
| 18 | Eyrieux@Pontpierre      | 0.982     | 0.848     | 0.951    | 0.979     | 0.862     | 0.963    | 0.978     | 0.843     | 0.961    |
| 19 | Gage@Gagell             | 0.931     | 0.971     | 0.921    | 0.915     | 0.974     | 0.937    | 0.894     | 0.970     | 0.924    |
| 20 | Gardon@Corbes           | 0.882     | 0.906     | 0.984    | 0.832     | 0.919     | 0.982    | 0.787     | 0.935     | 0.982    |
| 21 | Gardon@Generargues      | 0.968     | 0.909     | 0.928    | 0.967     | 0.921     | 0.958    | 0.960     | 0.906     | 0.957    |
| 22 | GaveEstaubé@Gloriettes  | 0.933     | 0.979     | 0.871    | 0.942     | 0.984     | 0.886    | 0.935     | 0.980     | 0.871    |
| 23 | Goussant@PontRolland    | 0.849     | 0.947     | 0.967    | 0.841     | 0.962     | 0.961    | 0.823     | 0.958     | 0.965    |
| 24 | Loire@Basset            | 0.966     | 0.815     | 0.931    | 0.969     | 0.832     | 0.935    | 0.969     | 0.815     | 0.935    |
| 25 | Loire@LaPalisse         | 0.940     | 0.943     | 0.884    | 0.937     | 0.944     | 0.896    | 0.912     | 0.958     | 0.891    |
| 26 | Lot@Castelnau           | 0.838     | 0.946     | 0.958    | 0.853     | 0.949     | 0.959    | 0.826     | 0.950     | 0.961    |
| 27 | Mimente@Florac          | 0.954     | 0.925     | 0.942    | 0.967     | 0.951     | 0.947    | 0.948     | 0.959     | 0.953    |
| 28 | Montane@Eyrein          | 0.918     | 0.975     | 0.895    | 0.926     | 0.982     | 0.917    | 0.928     | 0.982     | 0.929    |
| 29 | Oriege@Campaulil        | 0.820     | 0.944     | 0.986    | 0.819     | 0.953     | 0.989    | 0.826     | 0.951     | 0.987    |
| 30 | Ouveze@Bedarrides       | 0.971     | 0.863     | 0.958    | 0.977     | 0.926     | 0.946    | 0.978     | 0.929     | 0.942    |
| 31 | Rizzanese@Barrage       | 0.948     | 0.971     | 0.897    | 0.951     | 0.973     | 0.854    | 0.943     | 0.973     | 0.815    |
| 32 | Romanche@Chambon        | 0.932     | 0.948     | 0.970    | 0.941     | 0.956     | 0.975    | 0.912     | 0.945     | 0.971    |
| 33 | Roya@Breil              | 0.975     | 0.939     | 0.879    | 0.978     | 0.931     | 0.887    | 0.977     | 0.913     | 0.884    |
| 34 | Salat@Roquefort         | 0.952     | 0.990     | 0.872    | 0.937     | 0.991     | 0.892    | 0.953     | 0.991     | 0.899    |
| 35 | Sioule@Fades            | 0.924     | 0.906     | 0.957    | 0.928     | 0.906     | 0.969    | 0.930     | 0.903     | 0.969    |
| 36 | Souloise@Infernet       | 0.992     | 0.883     | 0.918    | 0.992     | 0.869     | 0.910    | 0.991     | 0.858     | 0.949    |
| 37 | Stura@Lanzo             | 0.916     | 0.988     | 0.841    | 0.951     | 0.988     | 0.796    | 0.945     | 0.986     | 0.862    |
| 38 | Tarn@Cocures            | 0.904     | 0.927     | 0.932    | 0.930     | 0.934     | 0.946    | 0.935     | 0.931     | 0.954    |
| 39 | Tarn@Millau             | 0.981     | 0.793     | 0.927    | 0.984     | 0.799     | 0.938    | 0.985     | 0.806     | 0.934    |
| 40 | Tarn@Montbrun           | 0.921     | 0.973     | 0.926    | 0.936     | 0.980     | 0.942    | 0.918     | 0.977     | 0.924    |
| 41 | Tarn@Pinet              | 0.917     | 0.922     | 0.982    | 0.922     | 0.902     | 0.980    | 0.923     | 0.900     | 0.981    |
| 42 | Tarnon@Florac           | 0.962     | 0.775     | 0.946    | 0.972     | 0.731     | 0.946    | 0.966     | 0.806     | 0.957    |
| 43 | Taurion@RocheTalamie    | 0.934     | 0.956     | 0.906    | 0.956     | 0.954     | 0.885    | 0.951     | 0.948     | 0.906    |
| 44 | Tech@Reynes             | 0.929     | 0.937     | 0.993    | 0.950     | 0.939     | 0.991    | 0.955     | 0.949     | 0.976    |
| 45 | Tet@Vinca               | 0.985     | 0.896     | 0.932    | 0.990     | 0.876     | 0.935    | 0.987     | 0.855     | 0.934    |
| 46 | Tinee@PontLune          | 0.924     | 0.989     | 0.879    | 0.949     | 0.983     | 0.873    | 0.958     | 0.994     | 0.840    |
| 47 | Truyere@Grandval        | 0.899     | 0.864     | 0.985    | 0.901     | 0.899     | 0.987    | 0.923     | 0.895     | 0.987    |
| 48 | Ubaye@RocheRousse       | 0.991     | 0.798     | 0.957    | 0.990     | 0.802     | 0.953    | 0.966     | 0.832     | 0.962    |
| 49 | Vence@Francheville      | 0.945     | 0.919     | 0.903    | 0.934     | 0.960     | 0.931    | 0.966     | 0.951     | 0.924    |
| 50 | Vienne@Bussy            | 0.871     | 0.900     | 0.980    | 0.846     | 0.904     | 0.985    | 0.887     | 0.906     | 0.982    |

**Table S3:** The values of the individual associated calibration metrics (KGE(Q), KGE(Qsea) and KGE(FDC)) for MORDOR V0, V1 and SD for all the catchments over the period P3

| ID | BV                      | MORDOR V0 |           |          | MORDOR V1 |           |          | MORDOR SD |           |          |
|----|-------------------------|-----------|-----------|----------|-----------|-----------|----------|-----------|-----------|----------|
|    |                         | KGE(Q)    | KGE(Qsea) | KGE(FDC) | KGE(Q)    | KGE(Qsea) | KGE(FDC) | KGE(Q)    | KGE(Qsea) | KGE(FDC) |
| 1  | Agout@Fraise            | 0.977     | 0.846     | 0.922    | 0.981     | 0.833     | 0.921    | 0.976     | 0.842     | 0.932    |
| 2  | Agout@LaRaviege         | 0.938     | 0.981     | 0.880    | 0.947     | 0.982     | 0.871    | 0.941     | 0.980     | 0.910    |
| 3  | Allier@Poutes           | 0.878     | 0.940     | 0.986    | 0.901     | 0.951     | 0.988    | 0.869     | 0.950     | 0.988    |
| 4  | Ardeche@Sauze           | 0.981     | 0.866     | 0.937    | 0.986     | 0.861     | 0.941    | 0.987     | 0.860     | 0.945    |
| 5  | Arn@Taillades           | 0.962     | 0.958     | 0.916    | 0.973     | 0.963     | 0.907    | 0.969     | 0.958     | 0.900    |
| 6  | Arve@Arthaz             | 0.908     | 0.932     | 0.975    | 0.931     | 0.939     | 0.972    | 0.857     | 0.919     | 0.978    |
| 7  | Behine@LaPoutroie       | 0.963     | 0.826     | 0.950    | 0.960     | 0.828     | 0.948    | 0.953     | 0.785     | 0.961    |
| 8  | Breze@Meyrueis          | 0.966     | 0.951     | 0.905    | 0.975     | 0.963     | 0.901    | 0.976     | 0.964     | 0.884    |
| 9  | Bromme@Brommat          | 0.893     | 0.910     | 0.978    | 0.891     | 0.900     | 0.979    | 0.903     | 0.918     | 0.976    |
| 10 | Ceze@Bagnols            | 0.971     | 0.801     | 0.915    | 0.977     | 0.770     | 0.917    | 0.977     | 0.820     | 0.927    |
| 11 | Chassezac@SteMarguerite | 0.937     | 0.963     | 0.788    | 0.955     | 0.970     | 0.783    | 0.958     | 0.971     | 0.795    |
| 12 | Creuse@Age              | 0.908     | 0.895     | 0.958    | 0.923     | 0.898     | 0.955    | 0.910     | 0.901     | 0.953    |
| 13 | Dordogne@Bort           | 0.956     | 0.788     | 0.947    | 0.975     | 0.801     | 0.967    | 0.974     | 0.804     | 0.963    |
| 14 | Doubs@Brenet            | 0.907     | 0.982     | 0.898    | 0.934     | 0.967     | 0.922    | 0.928     | 0.980     | 0.926    |
| 15 | Doubs@Neublans          | 0.910     | 0.897     | 0.978    | 0.917     | 0.893     | 0.977    | 0.905     | 0.923     | 0.977    |
| 16 | Drac@Sautet             | 0.983     | 0.844     | 0.941    | 0.962     | 0.840     | 0.961    | 0.971     | 0.867     | 0.958    |
| 17 | Durance@Clapiere        | 0.939     | 0.970     | 0.822    | 0.941     | 0.972     | 0.854    | 0.938     | 0.971     | 0.859    |
| 18 | Eyrieux@Pontpierre      | 0.886     | 0.948     | 0.967    | 0.887     | 0.948     | 0.977    | 0.874     | 0.929     | 0.974    |
| 19 | Gage@Gagell             | 0.956     | 0.861     | 0.965    | 0.943     | 0.865     | 0.960    | 0.922     | 0.859     | 0.965    |
| 20 | Gardon@Corbes           | 0.949     | 0.975     | 0.920    | 0.947     | 0.974     | 0.923    | 0.942     | 0.976     | 0.925    |
| 21 | Gardon@Generargues      | 0.893     | 0.935     | 0.968    | 0.898     | 0.930     | 0.979    | 0.900     | 0.940     | 0.974    |
| 22 | GaveEstaubé@Gloriettes  | 0.952     | 0.932     | 0.948    | 0.960     | 0.916     | 0.954    | 0.955     | 0.899     | 0.954    |
| 23 | Goussant@PontRolland    | 0.947     | 0.971     | 0.896    | 0.952     | 0.973     | 0.891    | 0.951     | 0.971     | 0.896    |
| 24 | Loire@Basset            | 0.894     | 0.929     | 0.948    | 0.905     | 0.925     | 0.955    | 0.882     | 0.942     | 0.957    |
| 25 | Loire@LaPalisse         | 0.954     | 0.756     | 0.943    | 0.945     | 0.745     | 0.944    | 0.915     | 0.799     | 0.944    |
| 26 | Lot@Castelnau           | 0.923     | 0.981     | 0.873    | 0.933     | 0.986     | 0.863    | 0.927     | 0.988     | 0.891    |
| 27 | Mimente@Florac          | 0.889     | 0.932     | 0.987    | 0.902     | 0.958     | 0.991    | 0.850     | 0.948     | 0.992    |
| 28 | Montane@Eyrein          | 0.940     | 0.855     | 0.951    | 0.947     | 0.856     | 0.956    | 0.947     | 0.849     | 0.956    |
| 29 | Oriege@Campaulil        | 0.964     | 0.954     | 0.902    | 0.972     | 0.966     | 0.898    | 0.975     | 0.963     | 0.890    |
| 30 | Ouveze@Bedarrides       | 0.862     | 0.959     | 0.957    | 0.880     | 0.959     | 0.947    | 0.868     | 0.961     | 0.932    |
| 31 | Rizzanese@Barrage       | 0.971     | 0.867     | 0.956    | 0.975     | 0.881     | 0.962    | 0.963     | 0.891     | 0.960    |
| 32 | Romanche@Chambon        | 0.949     | 0.991     | 0.896    | 0.957     | 0.992     | 0.892    | 0.956     | 0.987     | 0.894    |
| 33 | Roya@Breil              | 0.906     | 0.942     | 0.940    | 0.914     | 0.952     | 0.957    | 0.893     | 0.954     | 0.951    |
| 34 | Salat@Roquefort         | 0.993     | 0.925     | 0.900    | 0.991     | 0.919     | 0.923    | 0.993     | 0.916     | 0.926    |
| 35 | Sioule@Fades            | 0.954     | 0.987     | 0.895    | 0.962     | 0.984     | 0.891    | 0.962     | 0.987     | 0.901    |
| 36 | Souloise@Infernet       | 0.921     | 0.901     | 0.984    | 0.944     | 0.905     | 0.981    | 0.922     | 0.892     | 0.991    |
| 37 | Stura@Lanzo             | 0.969     | 0.903     | 0.881    | 0.986     | 0.908     | 0.899    | 0.986     | 0.884     | 0.907    |
| 38 | Tarn@Cocures            | 0.948     | 0.944     | 0.851    | 0.951     | 0.946     | 0.825    | 0.956     | 0.951     | 0.823    |
| 39 | Tarn@Millau             | 0.926     | 0.945     | 0.983    | 0.926     | 0.963     | 0.985    | 0.934     | 0.959     | 0.984    |
| 40 | Tarn@Montbrun           | 0.971     | 0.810     | 0.928    | 0.975     | 0.855     | 0.930    | 0.972     | 0.844     | 0.934    |
| 41 | Tarn@Pinet              | 0.930     | 0.936     | 0.916    | 0.929     | 0.925     | 0.920    | 0.919     | 0.931     | 0.914    |
| 42 | Tarnon@Florac           | 0.908     | 0.899     | 0.990    | 0.917     | 0.904     | 0.989    | 0.902     | 0.891     | 0.982    |
| 43 | Taurion@RocheTalamie    | 0.982     | 0.792     | 0.931    | 0.990     | 0.811     | 0.945    | 0.988     | 0.848     | 0.950    |
| 44 | Tech@Reynes             | 0.956     | 0.984     | 0.867    | 0.967     | 0.990     | 0.859    | 0.967     | 0.984     | 0.878    |
| 45 | Tet@Vinca               | 0.952     | 0.941     | 0.974    | 0.952     | 0.939     | 0.977    | 0.943     | 0.957     | 0.965    |
| 46 | Tinee@PontLune          | 0.988     | 0.868     | 0.954    | 0.988     | 0.839     | 0.962    | 0.992     | 0.881     | 0.962    |
| 47 | Truyere@Grandval        | 0.949     | 0.888     | 0.933    | 0.948     | 0.908     | 0.941    | 0.950     | 0.920     | 0.939    |
| 48 | Ubaye@RocheRousse       | 0.923     | 0.886     | 0.980    | 0.914     | 0.930     | 0.986    | 0.904     | 0.928     | 0.988    |
| 49 | Vence@Francheville      | 0.991     | 0.787     | 0.926    | 0.985     | 0.803     | 0.934    | 0.994     | 0.799     | 0.931    |
| 50 | Vienne@Bussy            | 0.934     | 0.944     | 0.906    | 0.943     | 0.949     | 0.920    | 0.950     | 0.946     | 0.922    |

# Agout@Fraise

Year 1974

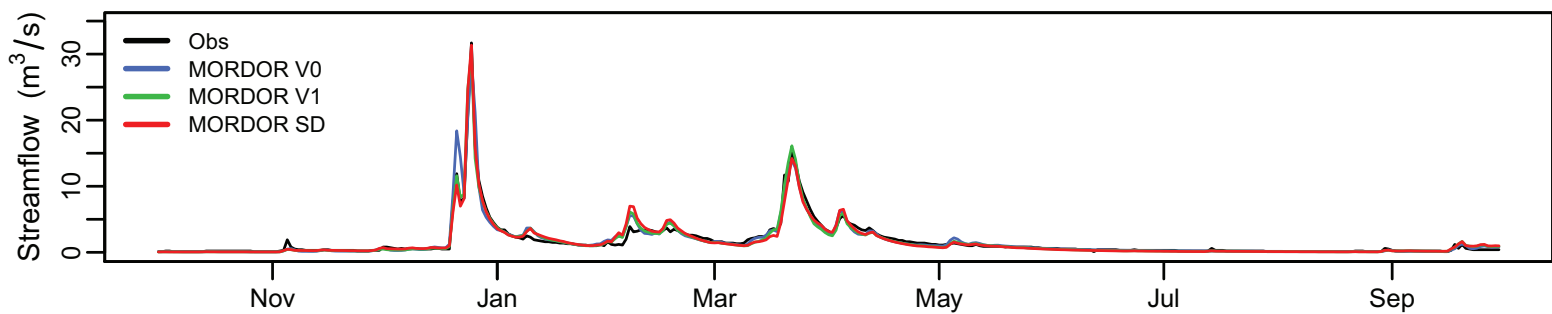

Year 1975

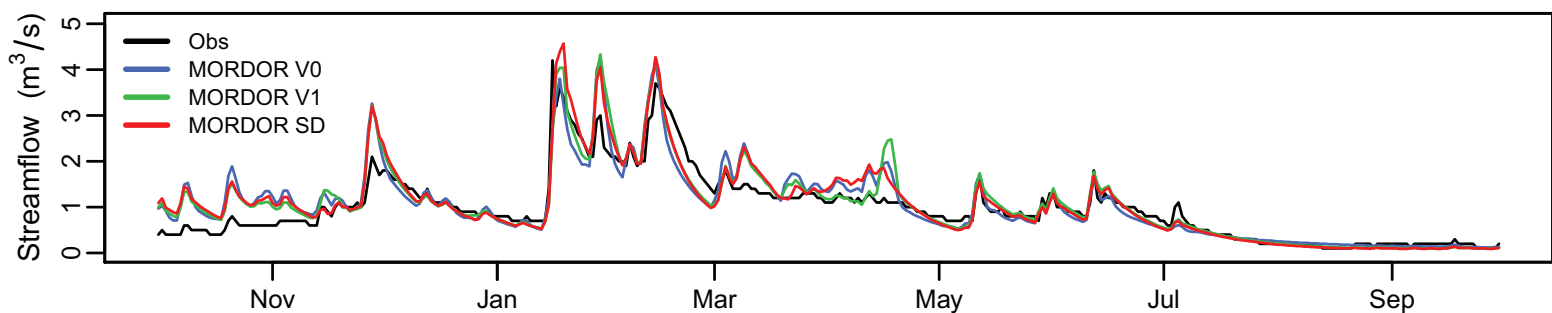

Year 1976

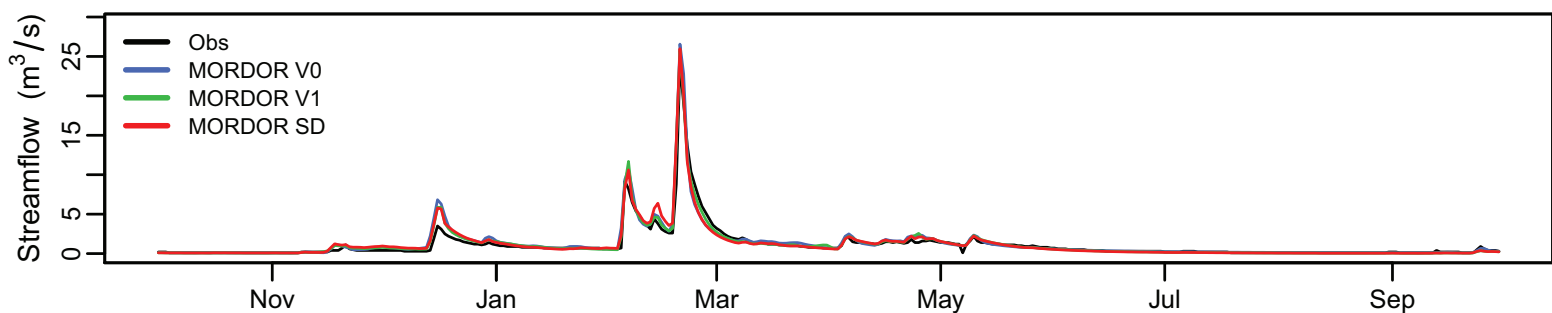

Year 1977

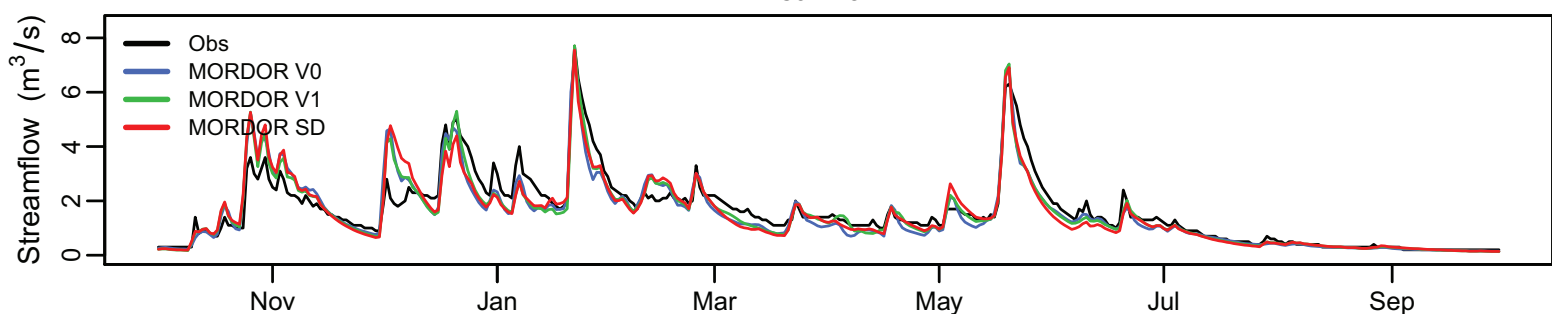

Year 1978

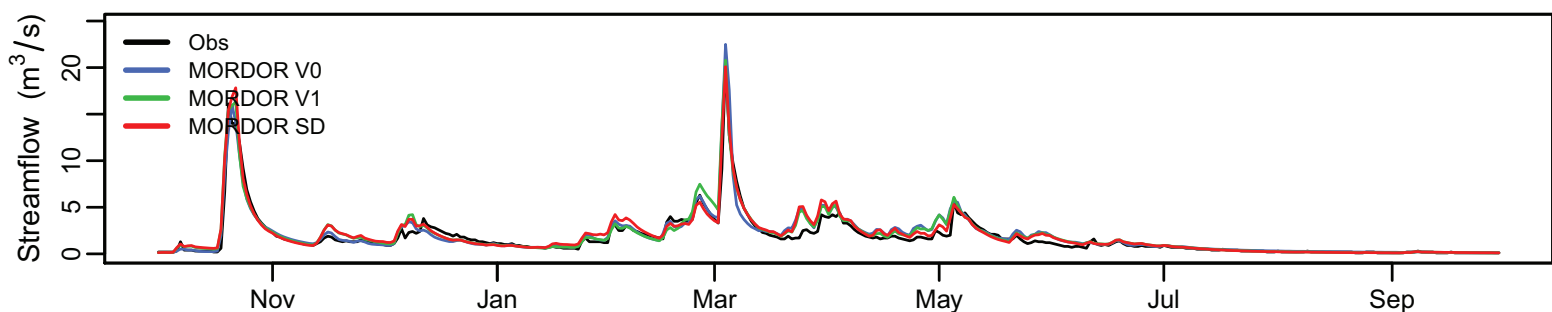

Year 1979

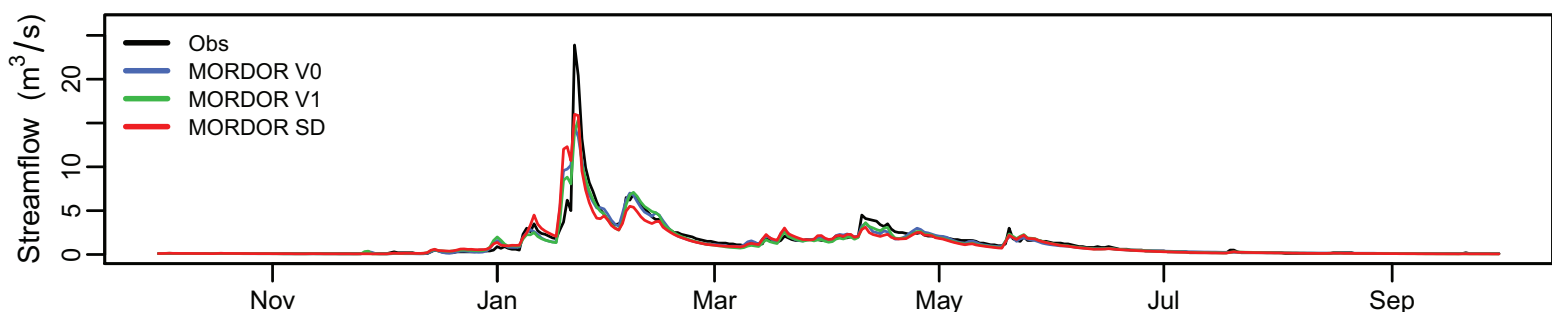

# Agout@Fraise

Year 1980

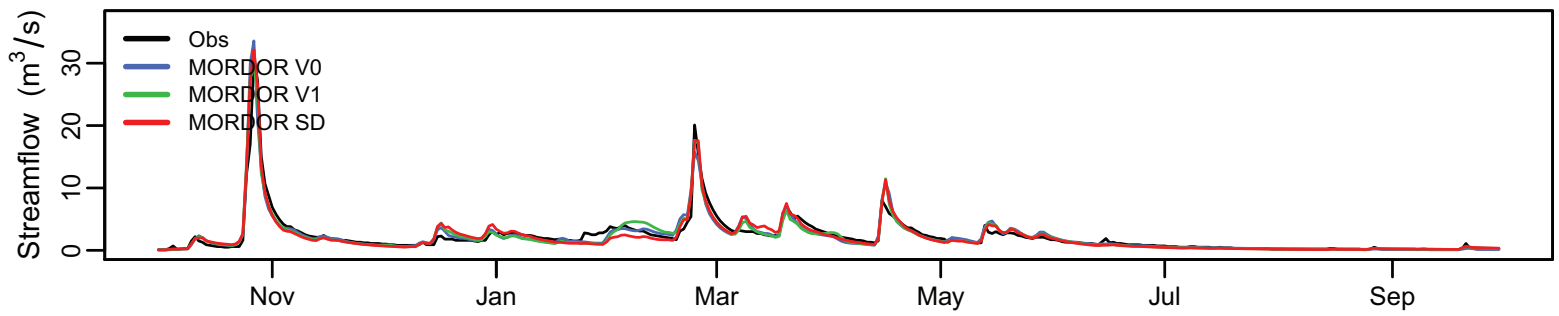

Year 1981

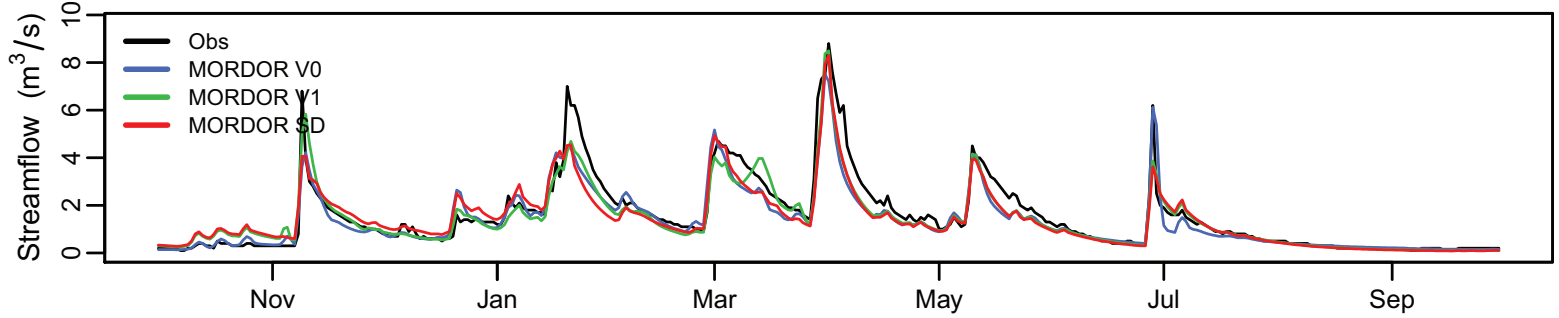

Year 1982

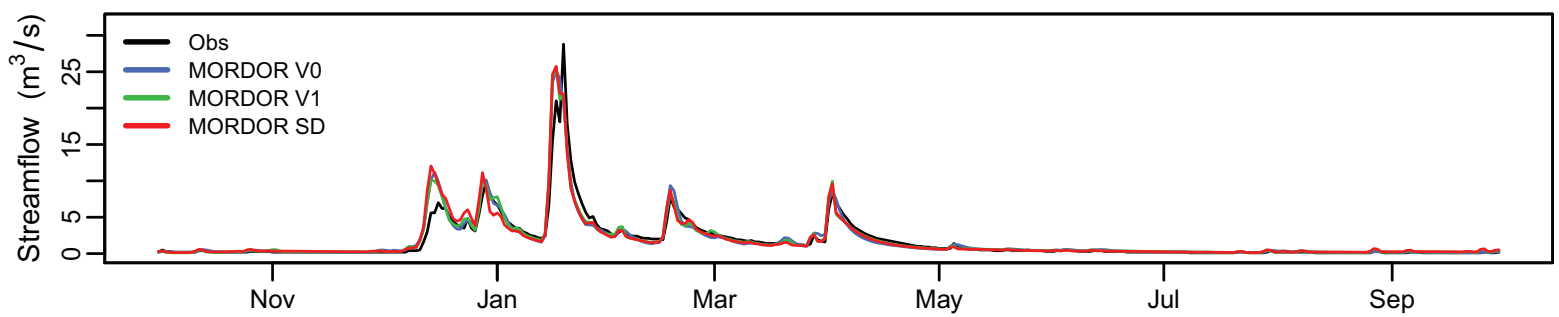

Year 1983

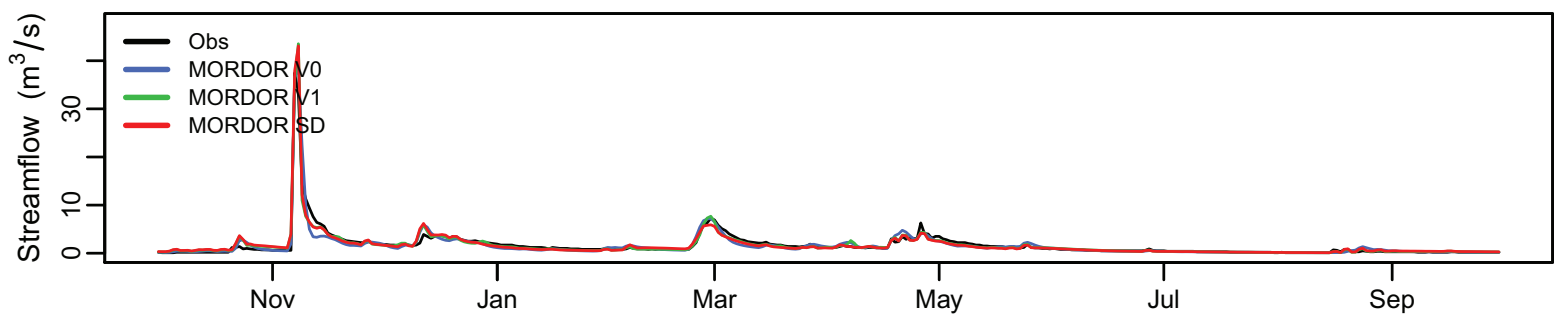

Year 1984

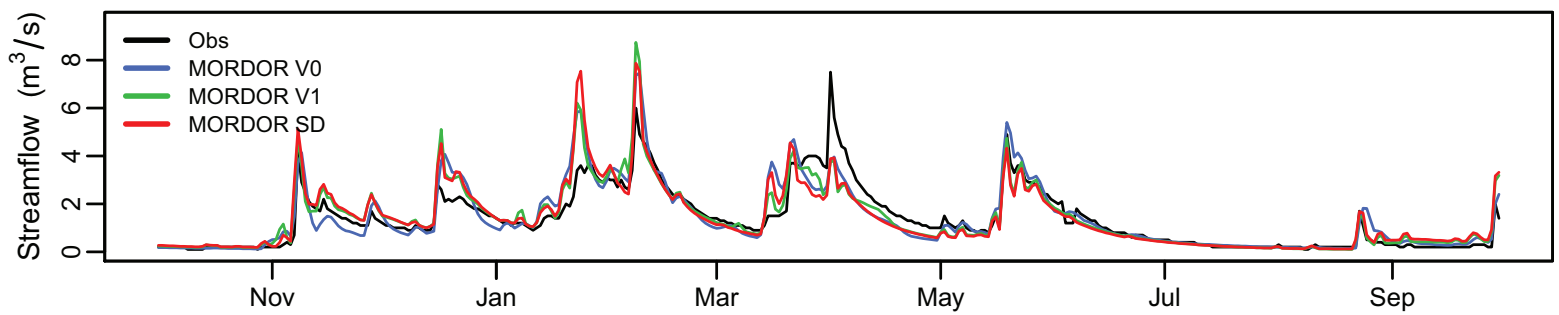

Year 1985

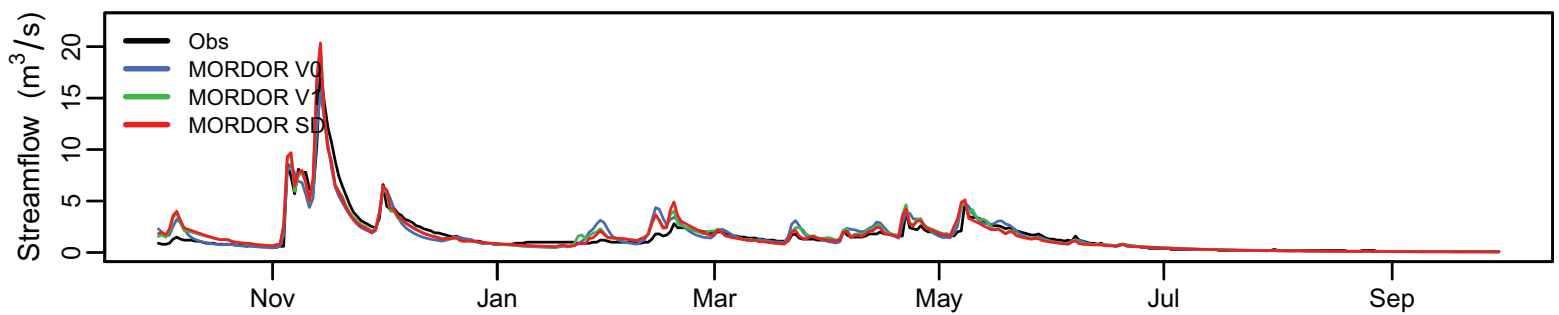

# Agout@Fraise

Year 1986

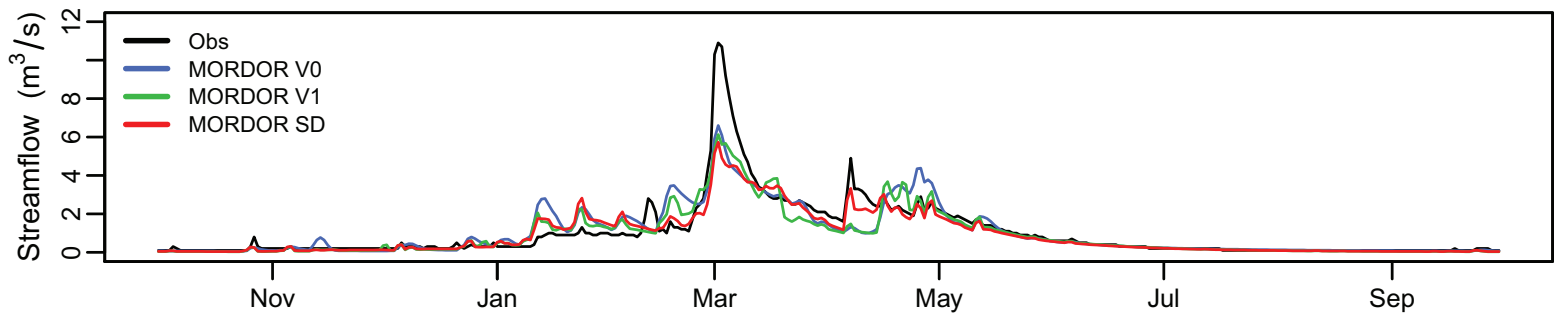

Year 1987

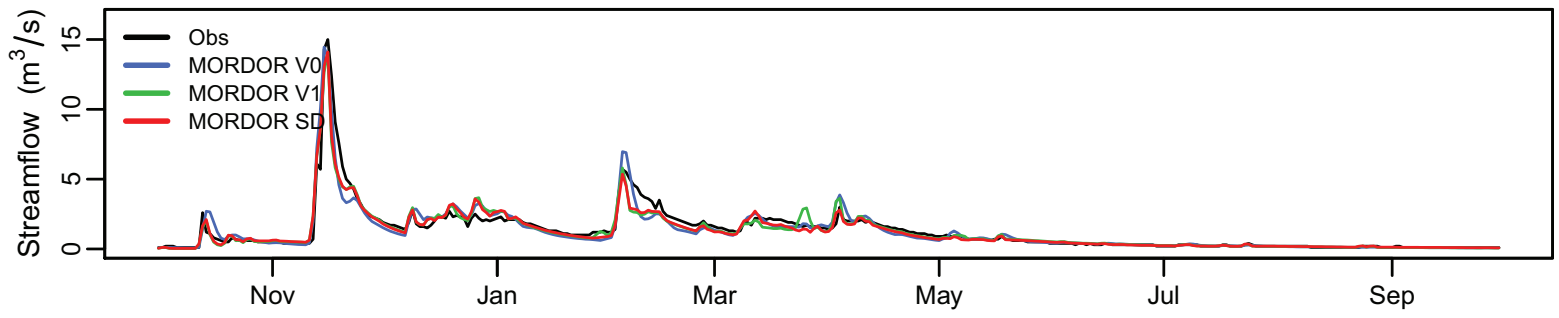

Year 1988

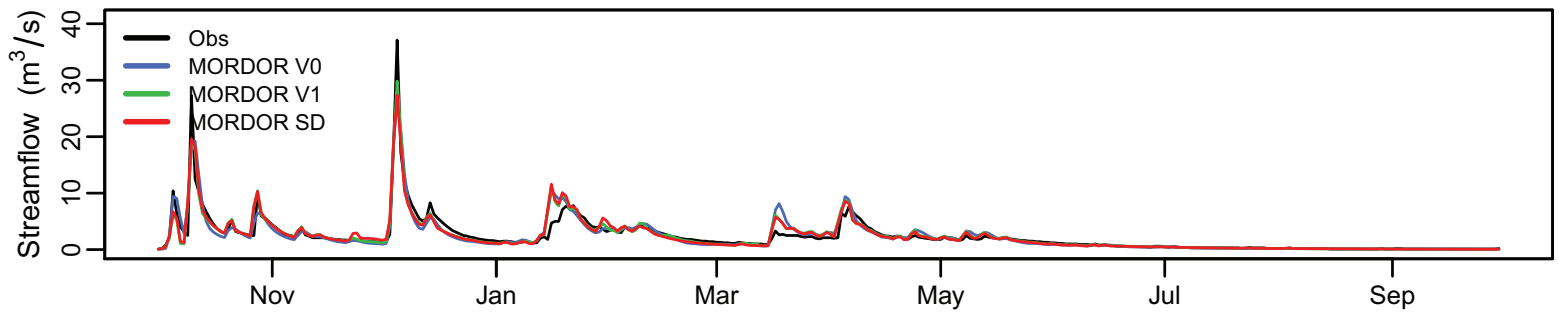



# Agout@LaRaviege

Year 1974

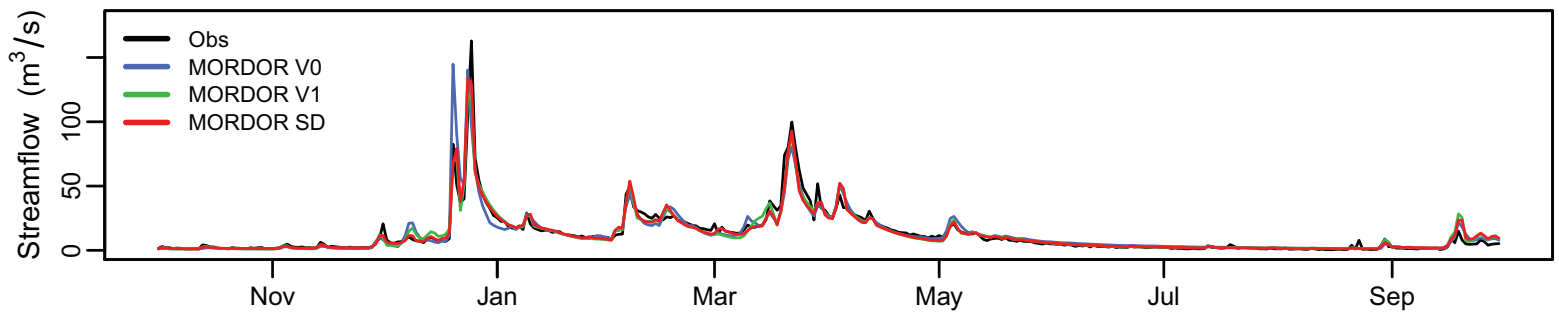

Year 1975

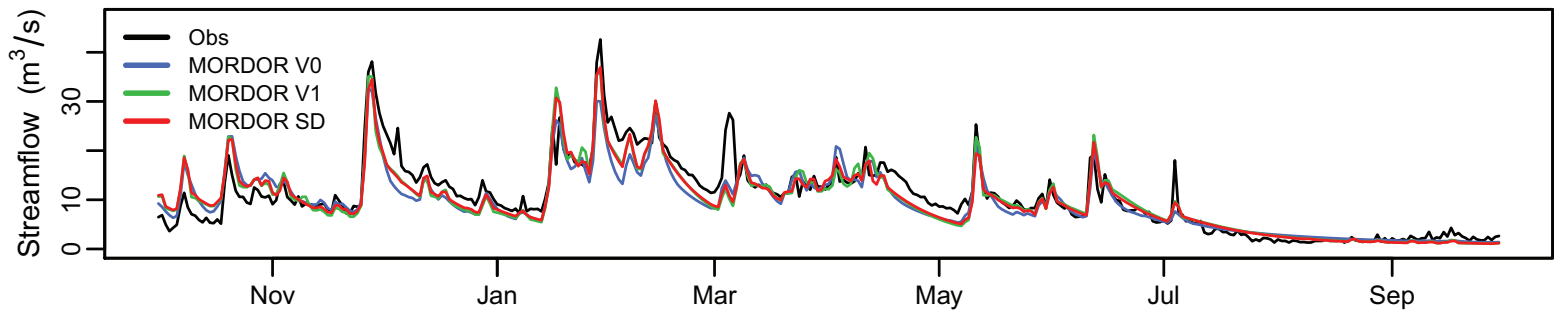

Year 1976

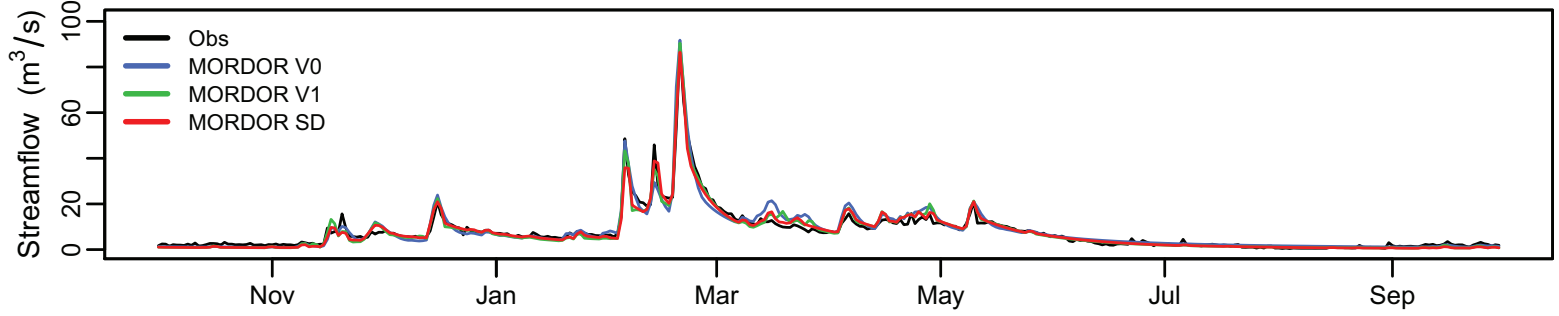

Year 1977

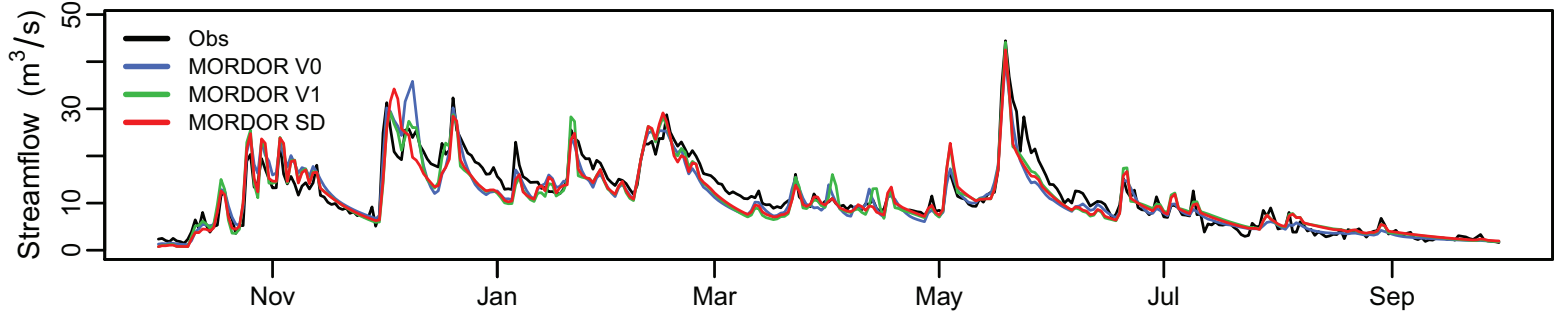

Year 1978

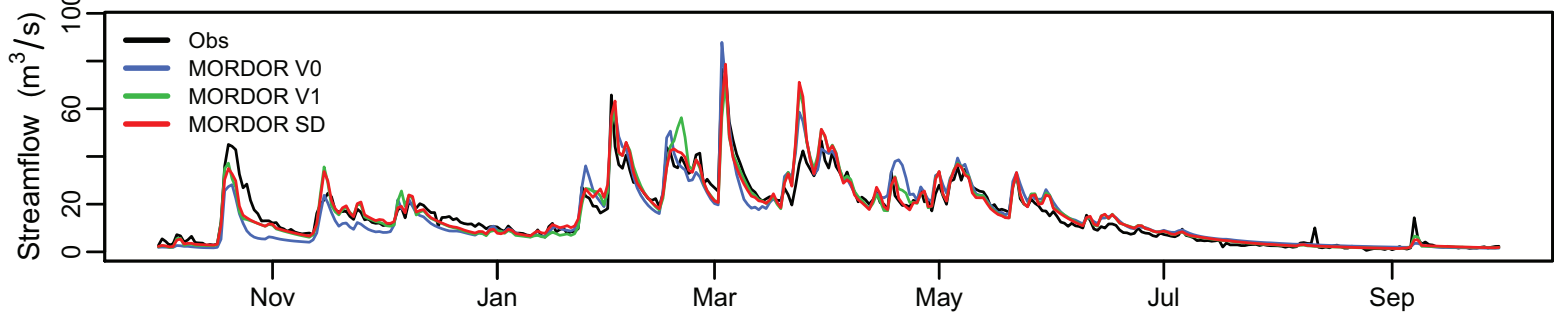

Year 1979

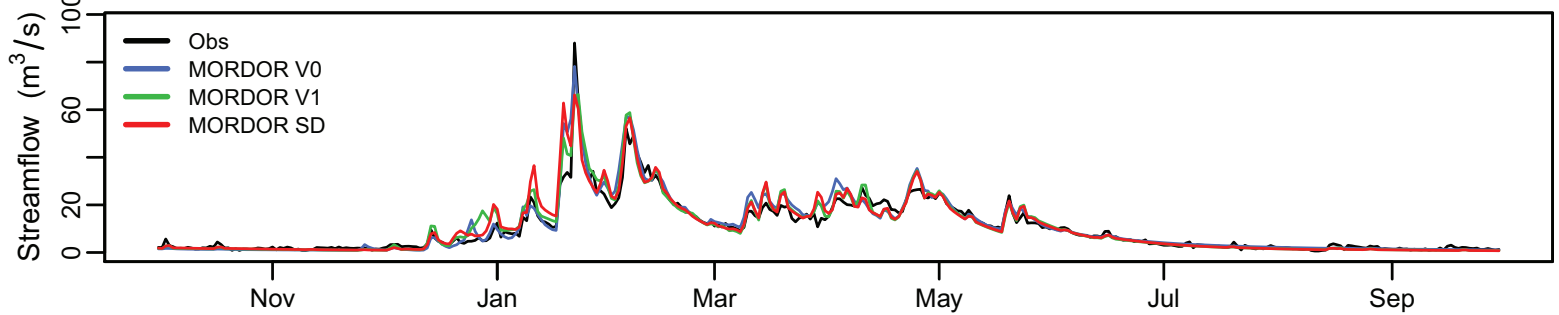

# Agout@LaRaviege

Year 1980

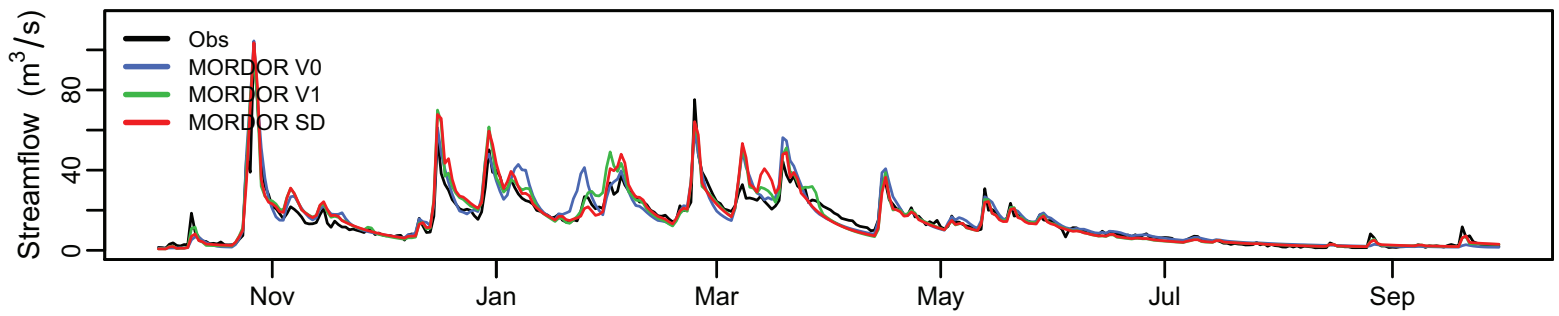

Year 1981

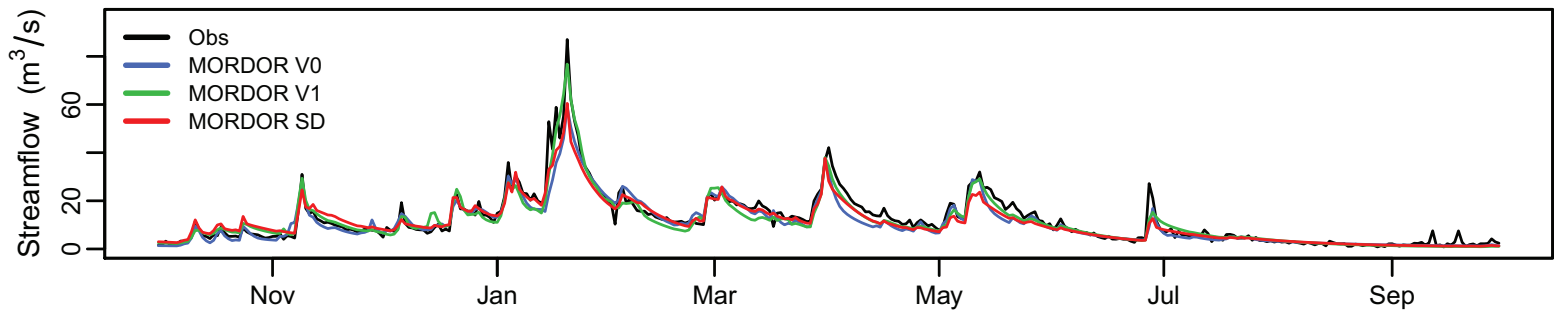

Year 1982

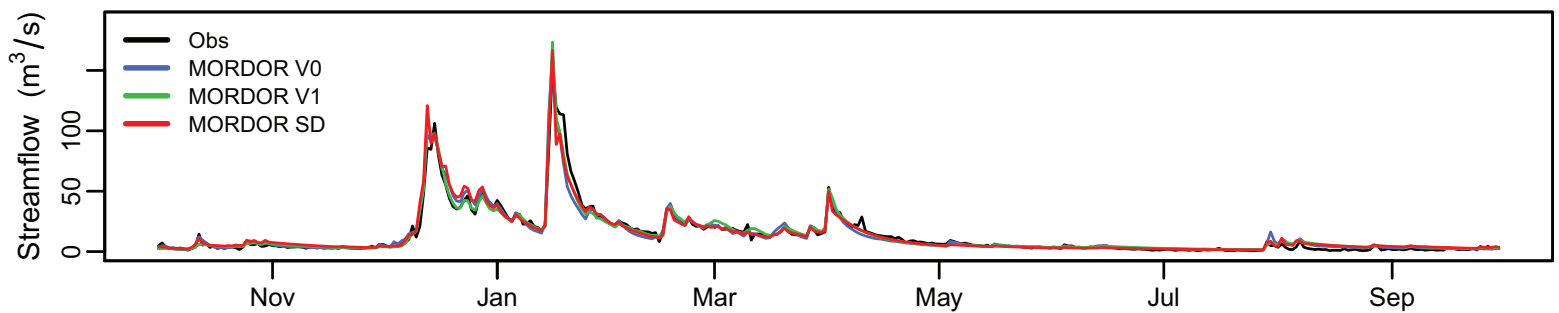

Year 1983

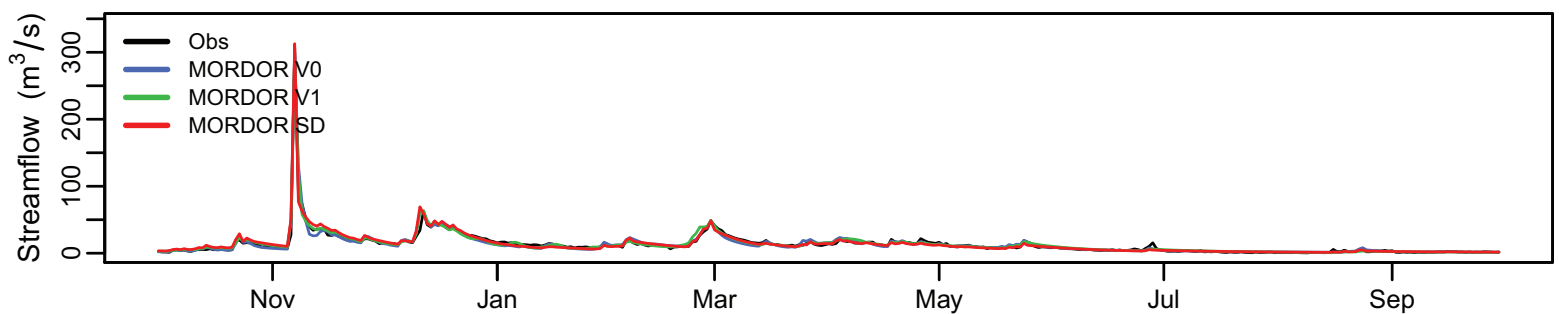

Year 1984

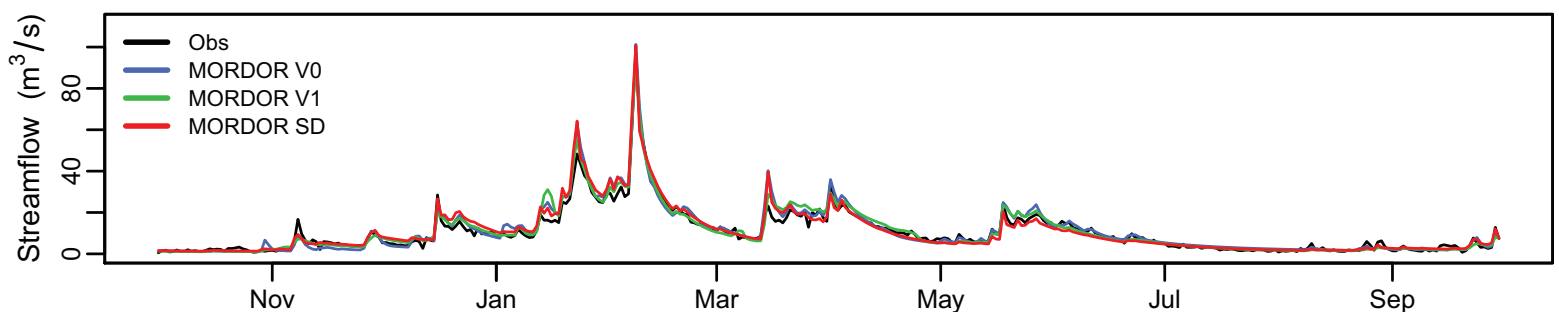

Year 1985

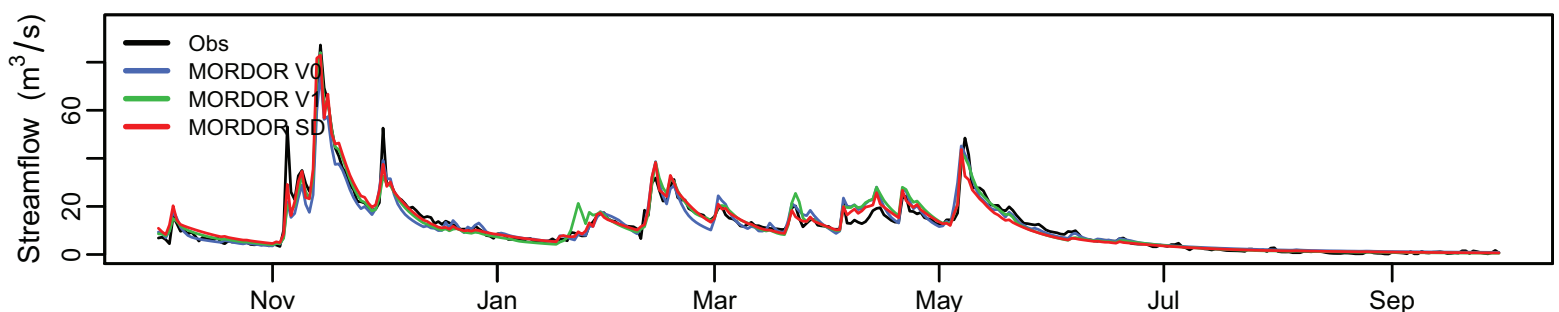

# Agout@LaRaviege

Year 1986

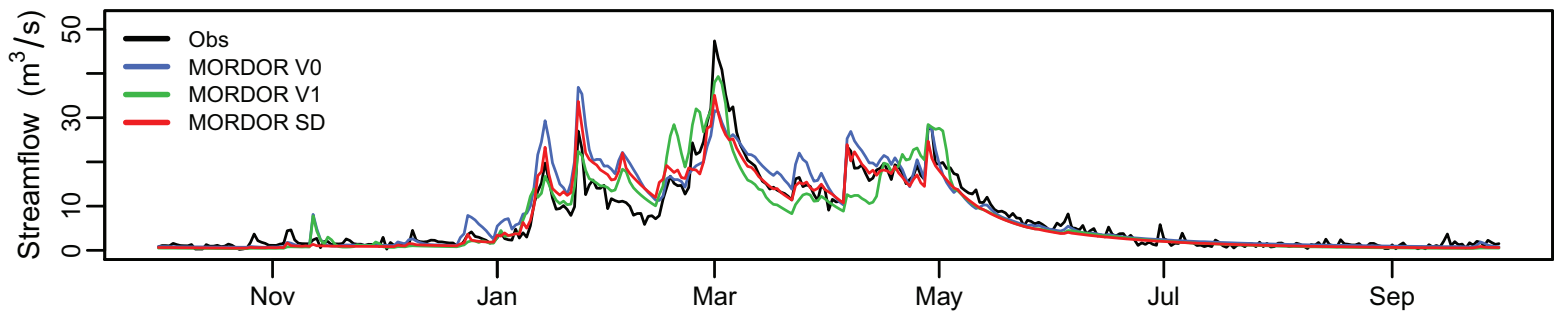

Year 1987

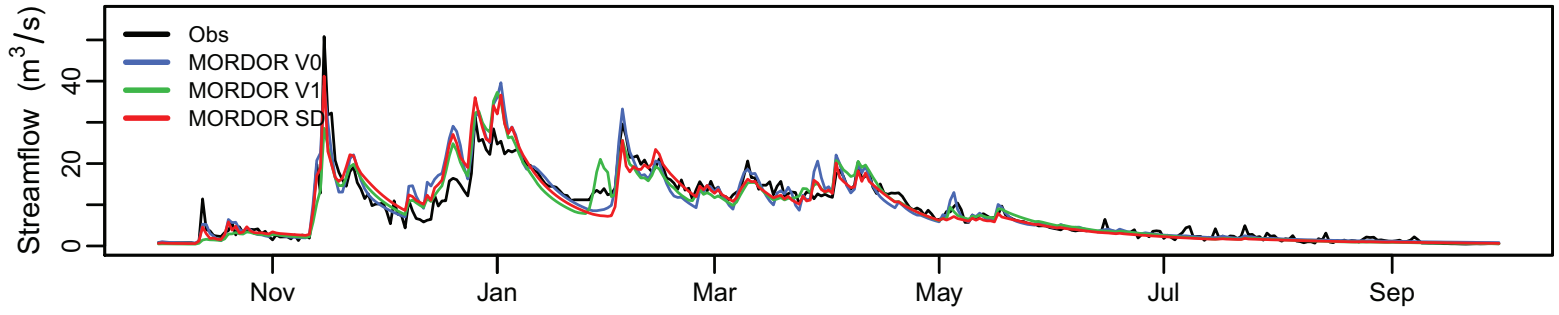

# Allier@Poutes

Year 1989

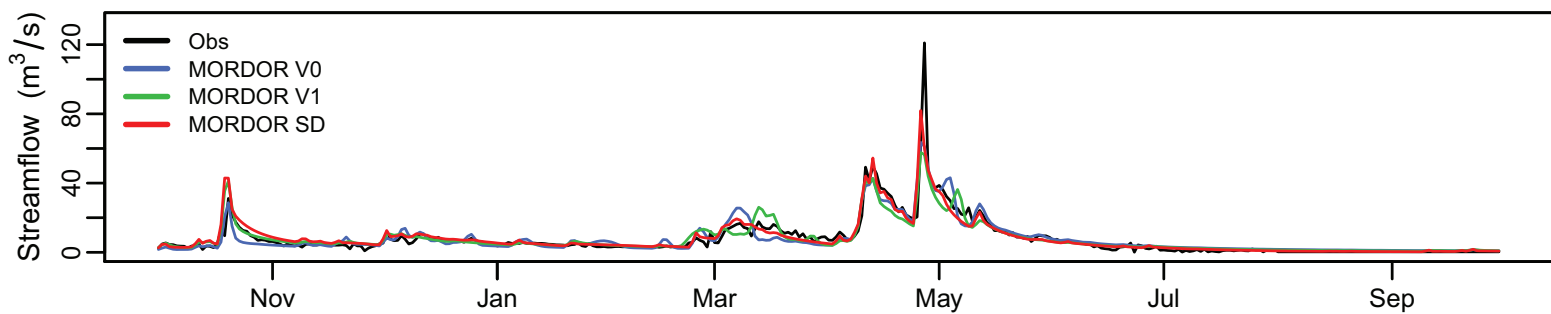

Year 1990

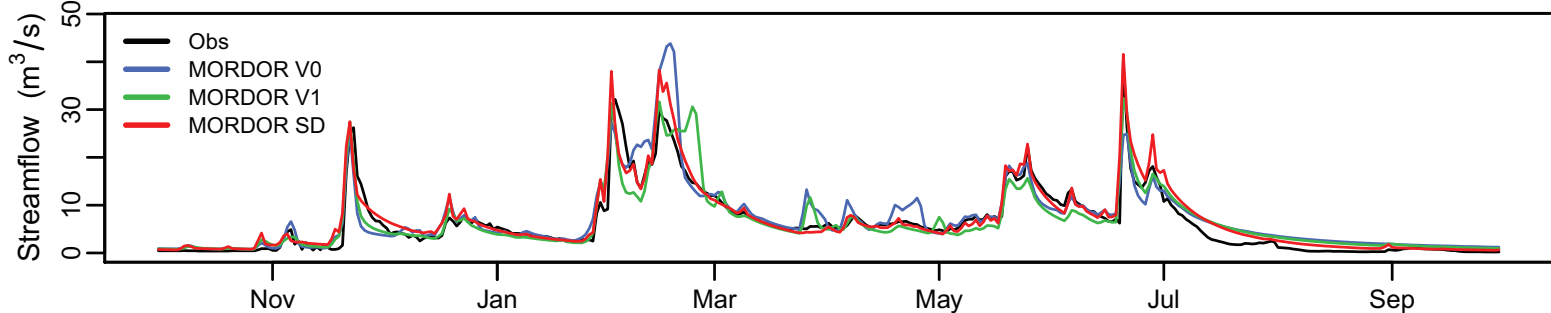

Year 1991

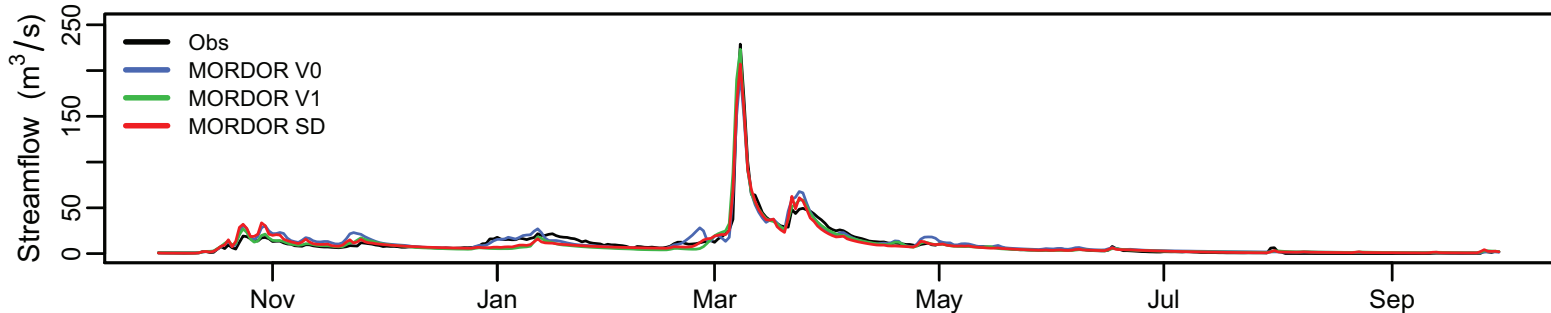

Year 1992

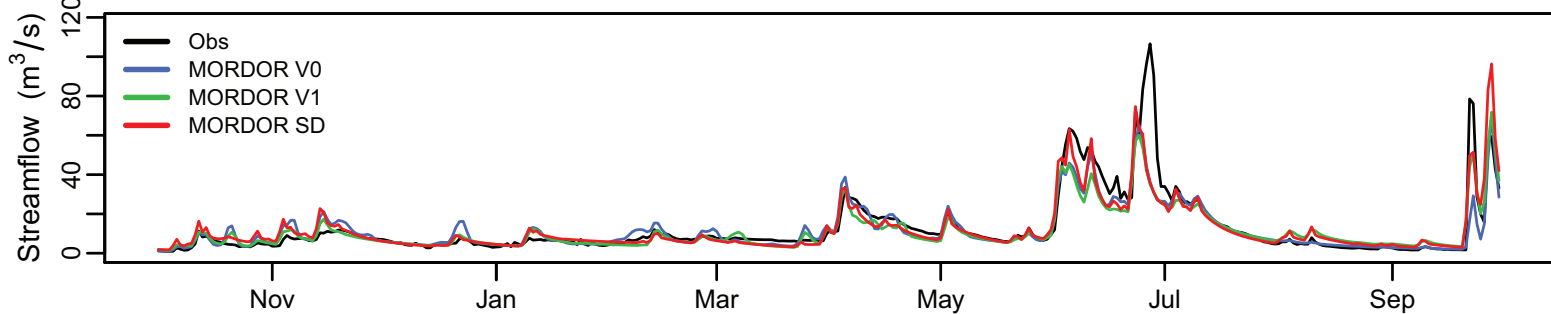

Year 1993

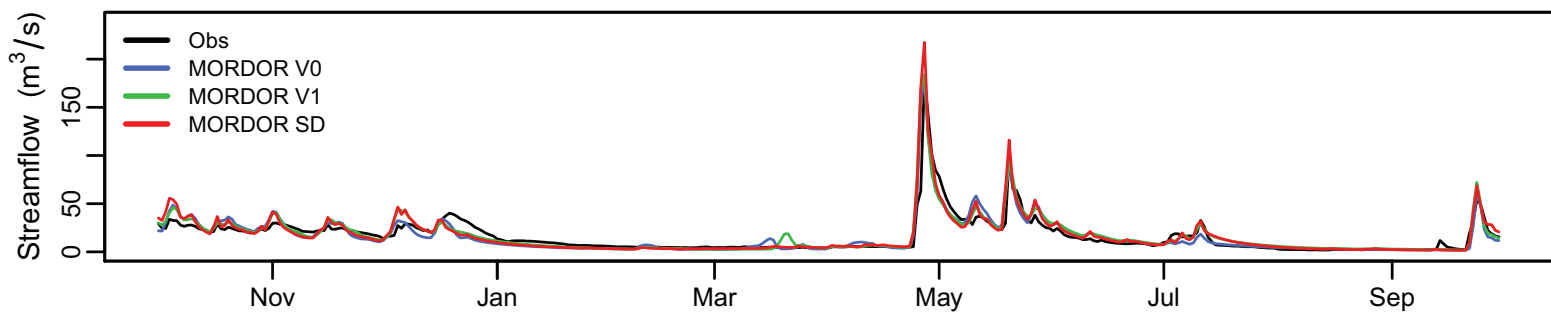

Year 1994

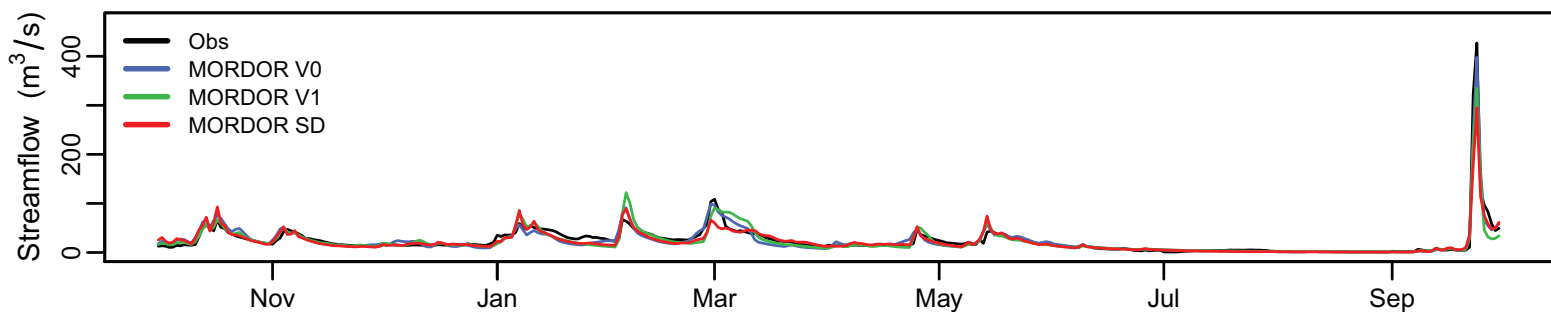

# Allier@Poutes

Year 1995

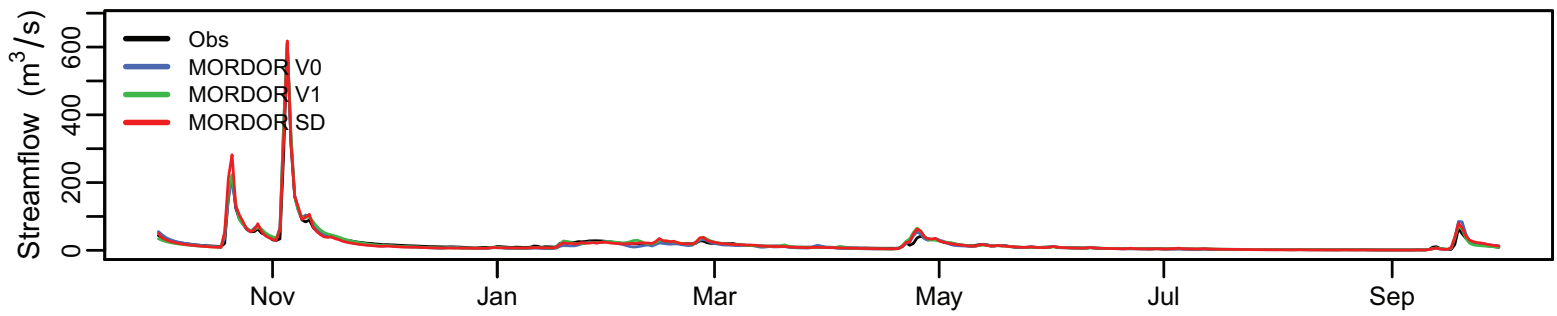

Year 1996

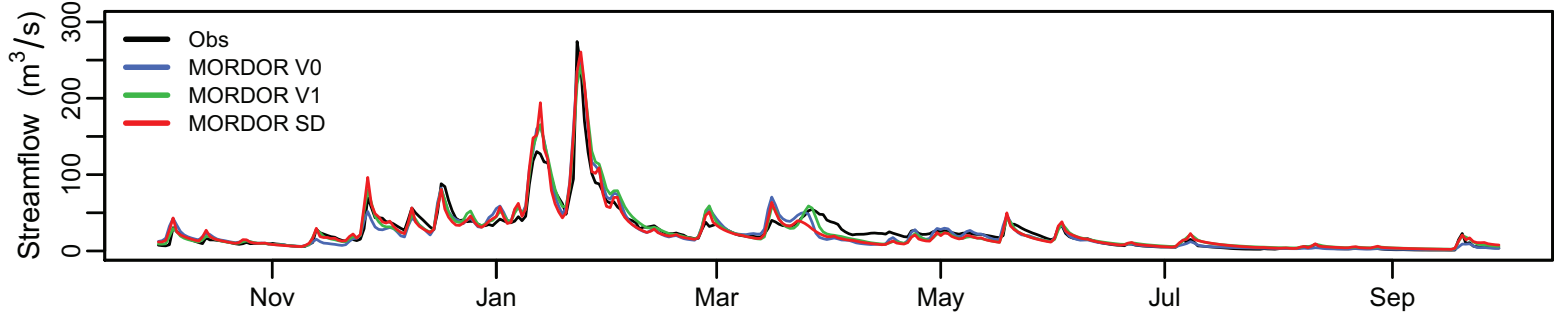

Year 1997

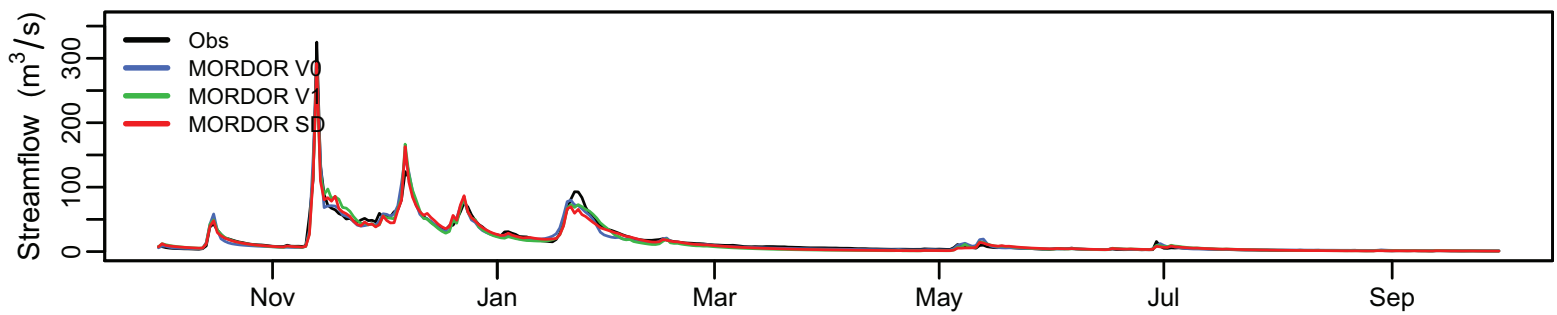

Year 1998

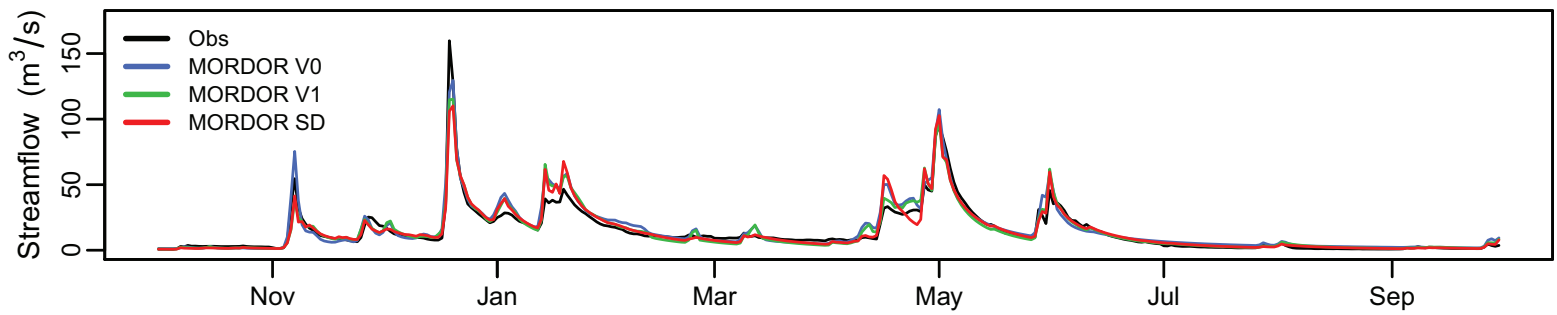

Year 1999

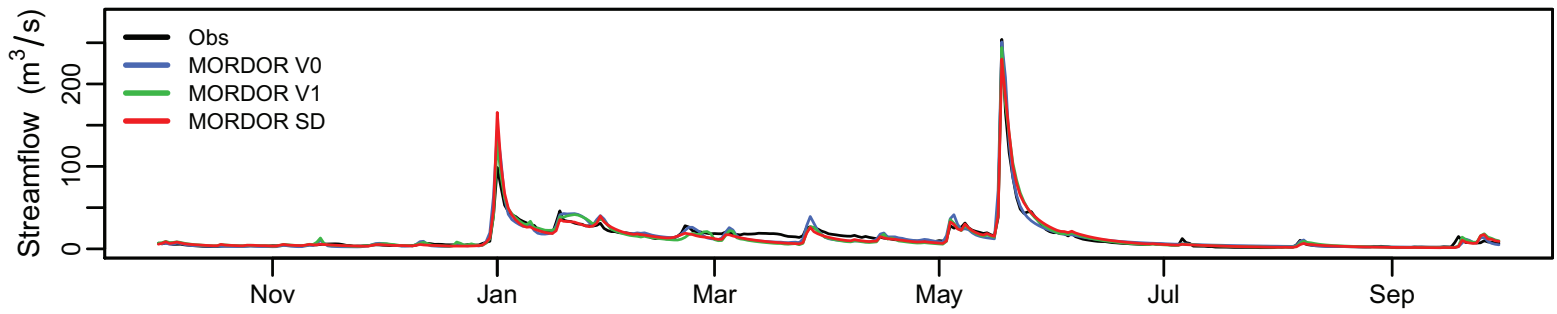

Year 2000

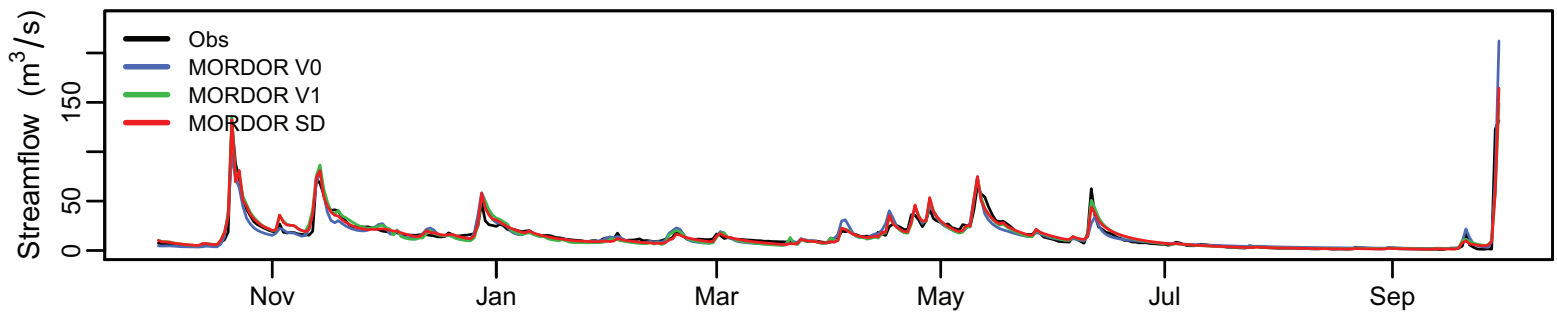

# Allier@Poutes

Year 2001

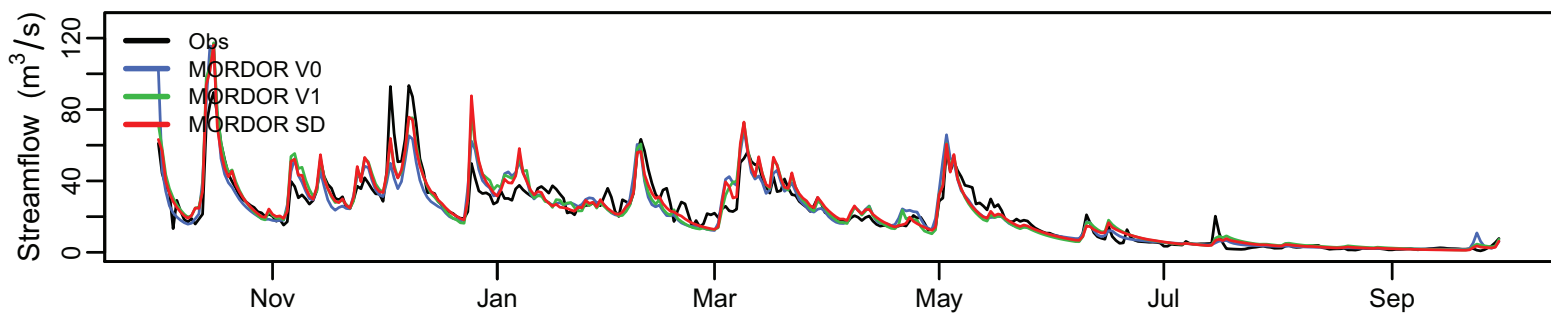

Year 2002

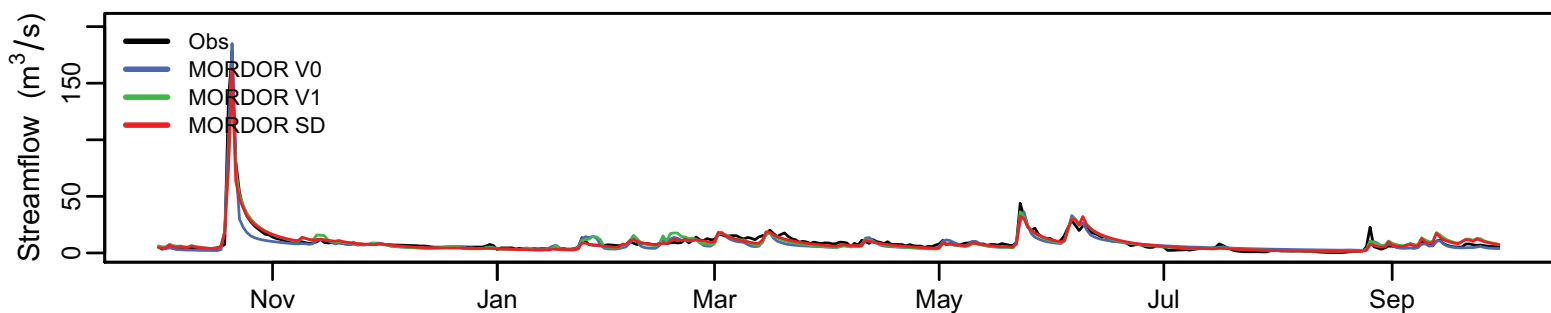

Year 2003

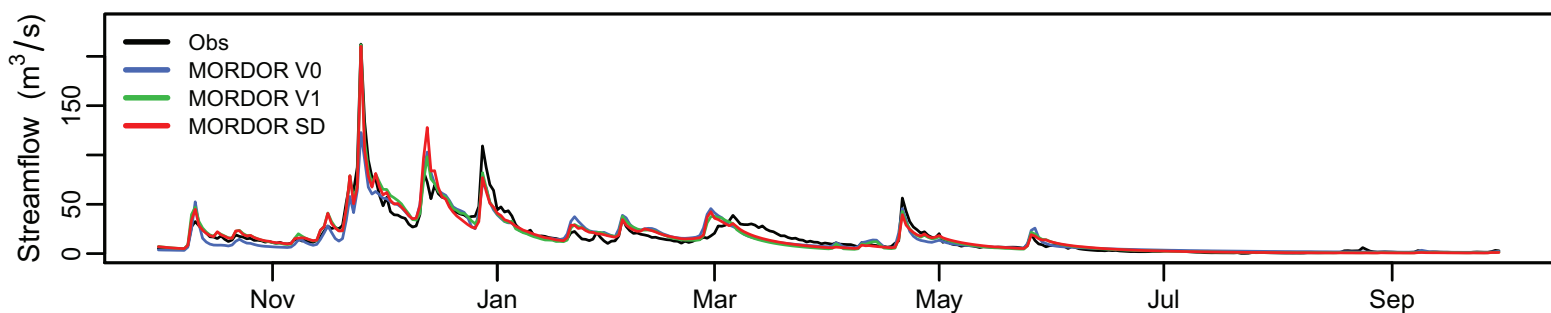

Year 2004

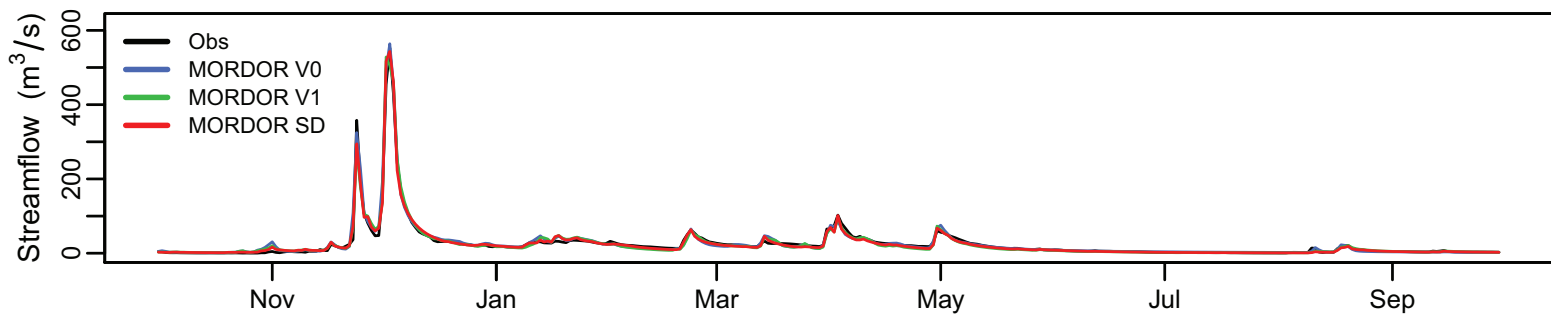

# Ardeche@Sauze

Year 1962

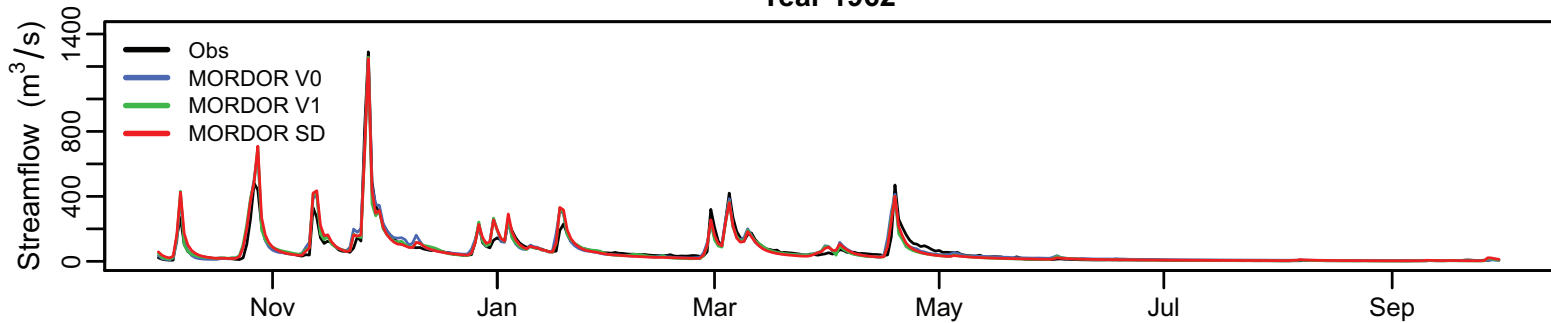

Year 1963

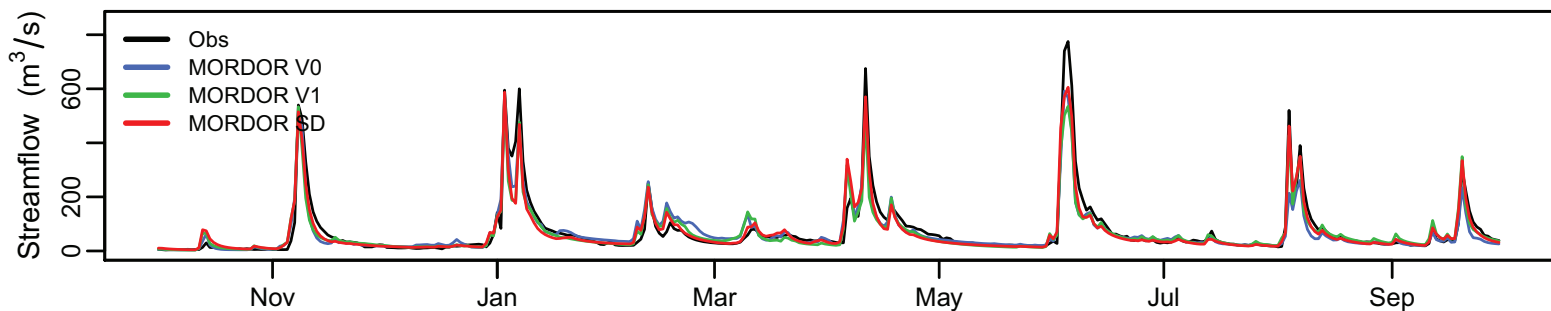

Year 1964

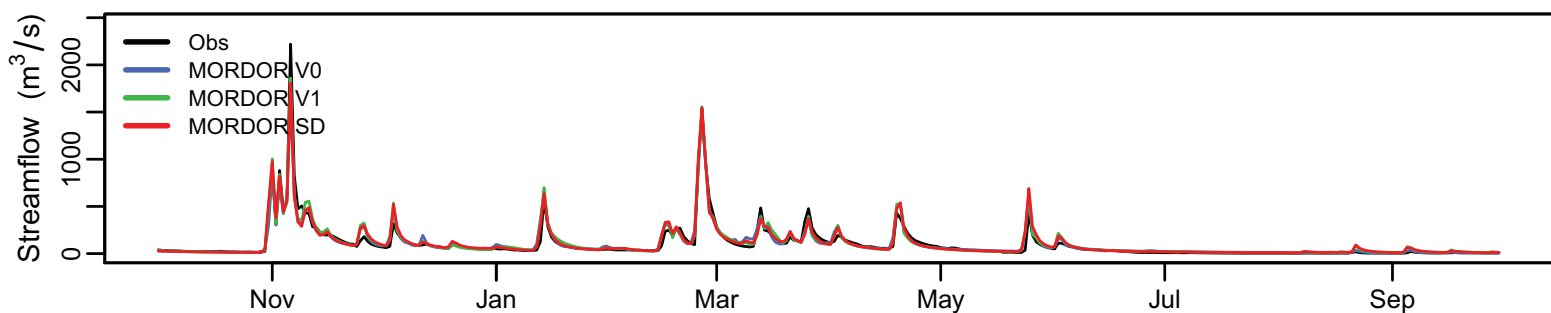

Year 1965

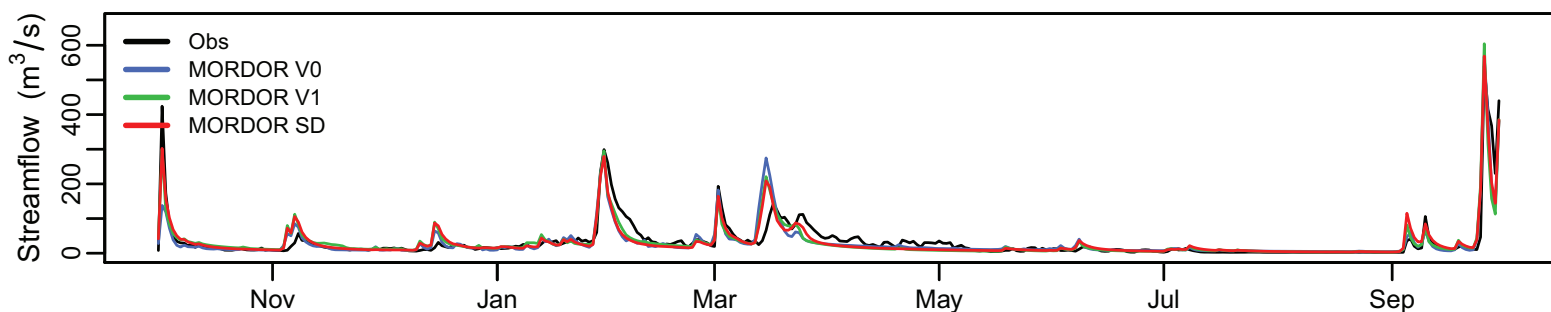

Year 1966

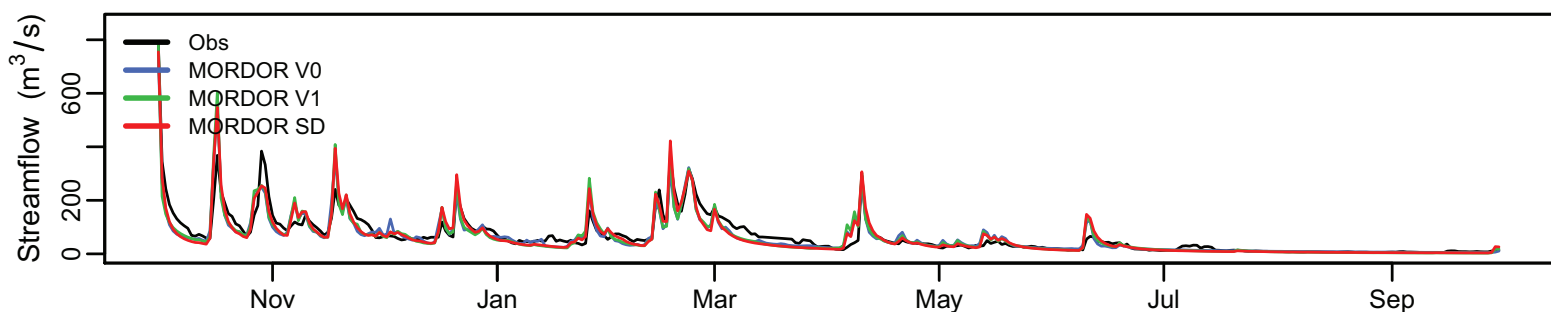

Year 1967

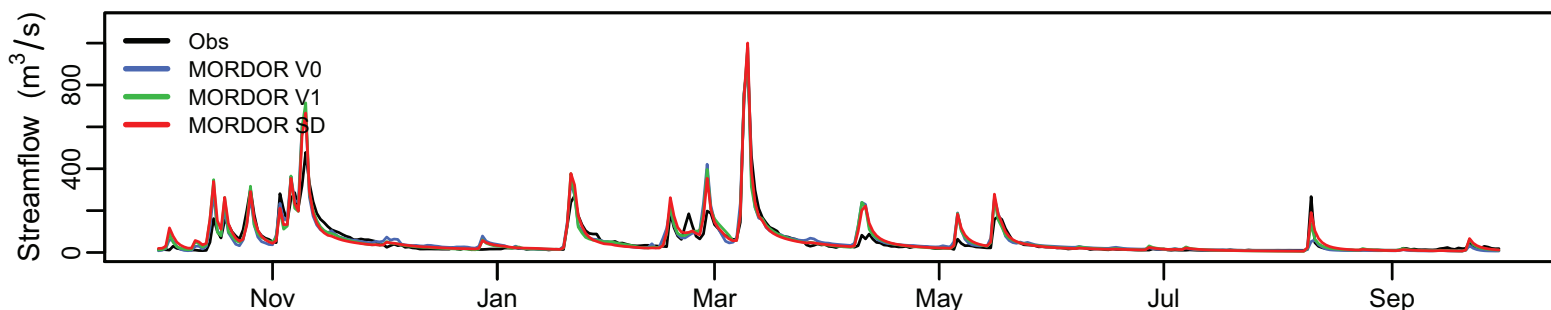

# Ardeche@Sauze

Year 1968

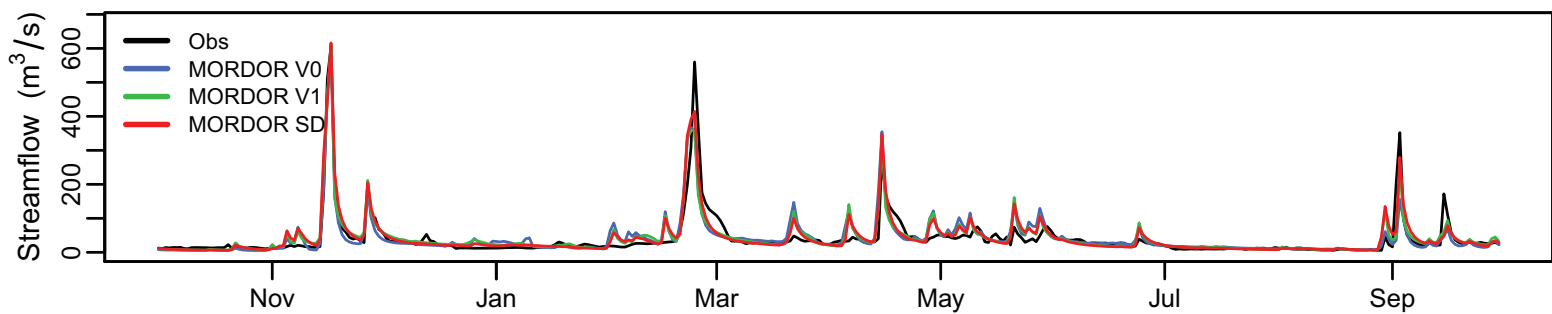

Year 1969

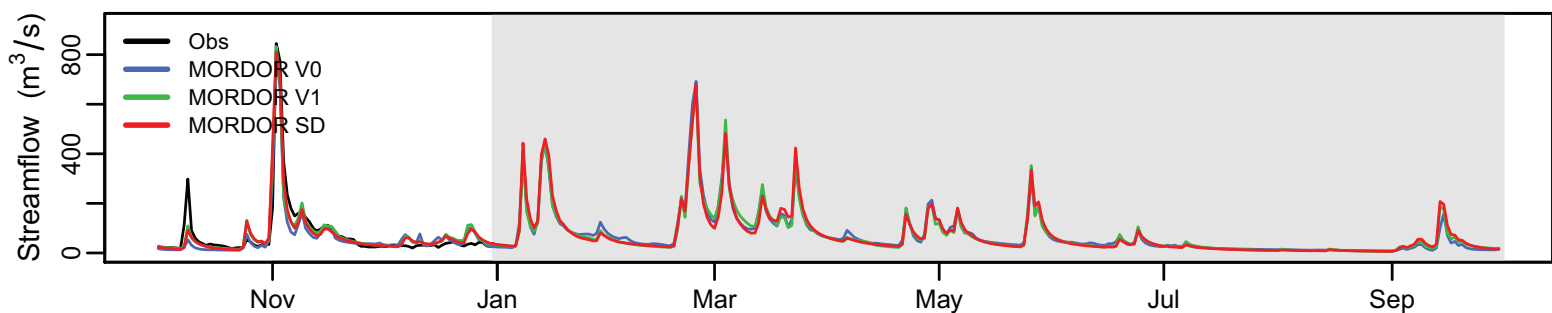

Year 1970

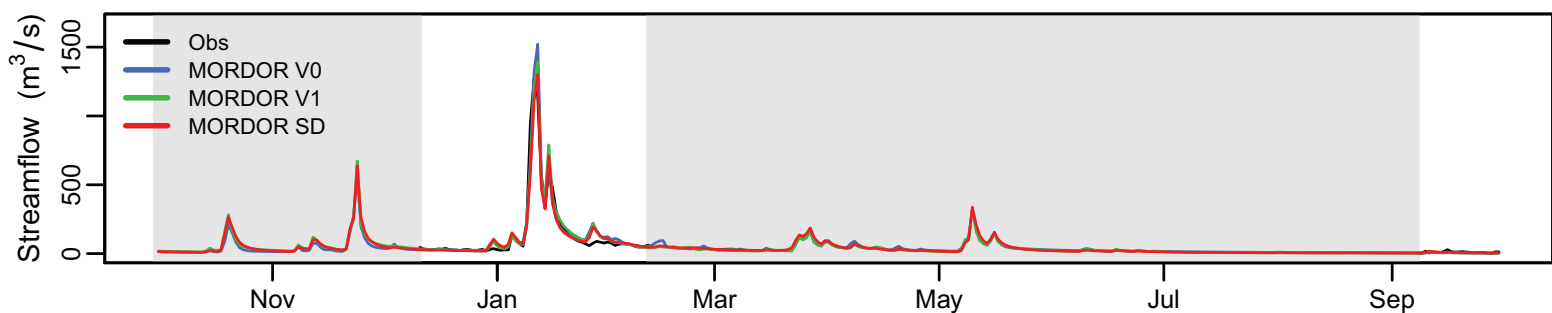

Year 1971

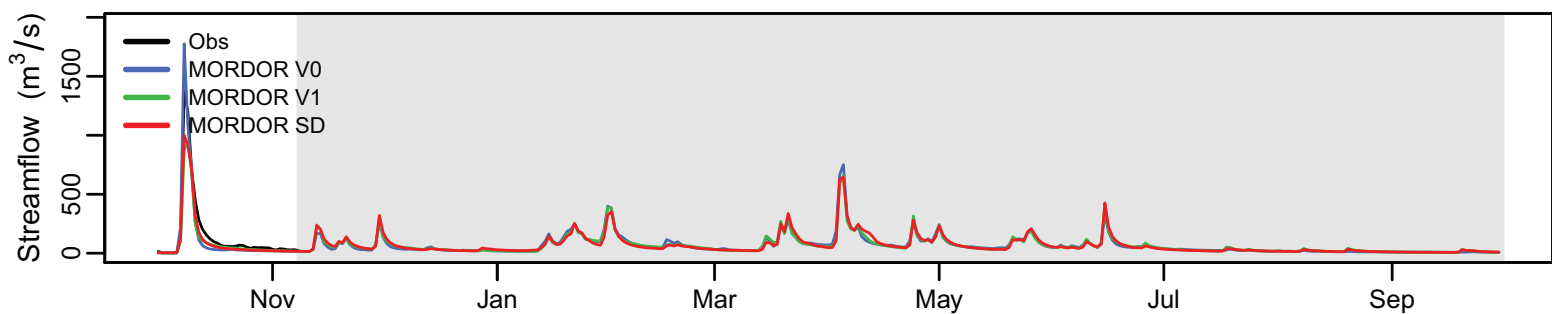

Year 1972

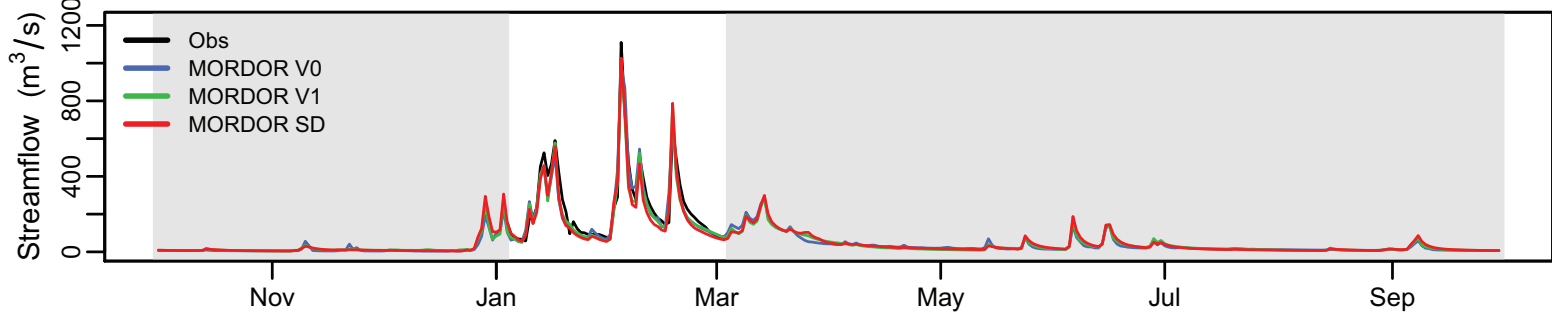

Year 1973

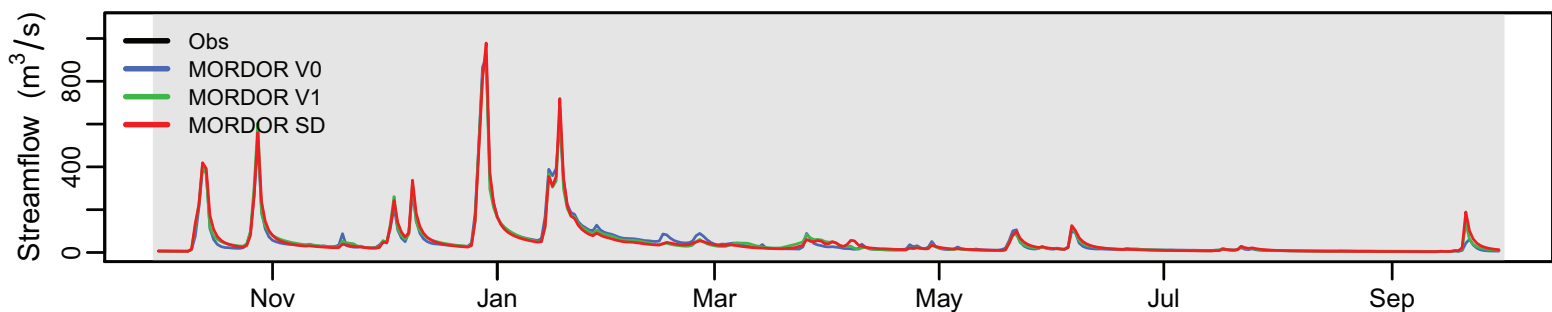



# Ardeche@Sauze

Year 1974

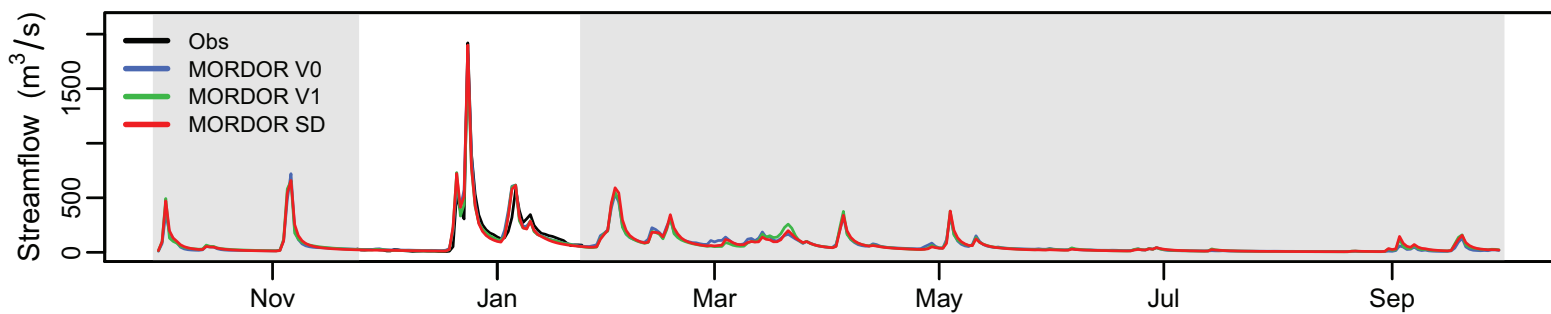

Year 1975

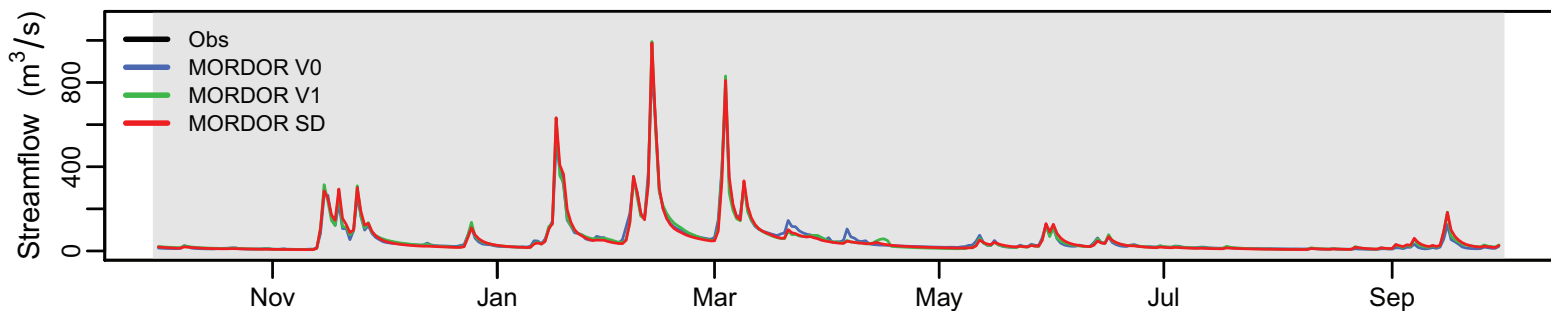

Year 1976

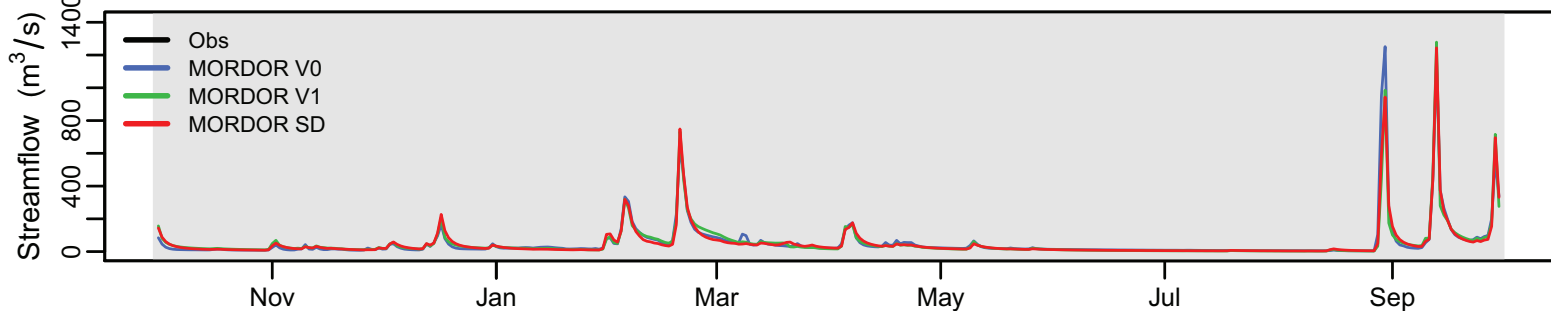

Year 1977

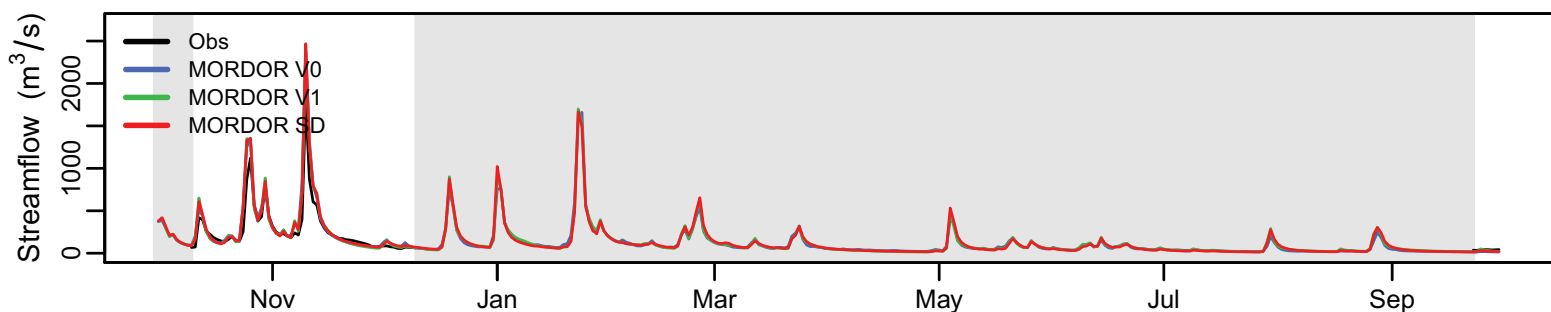

Year 1978

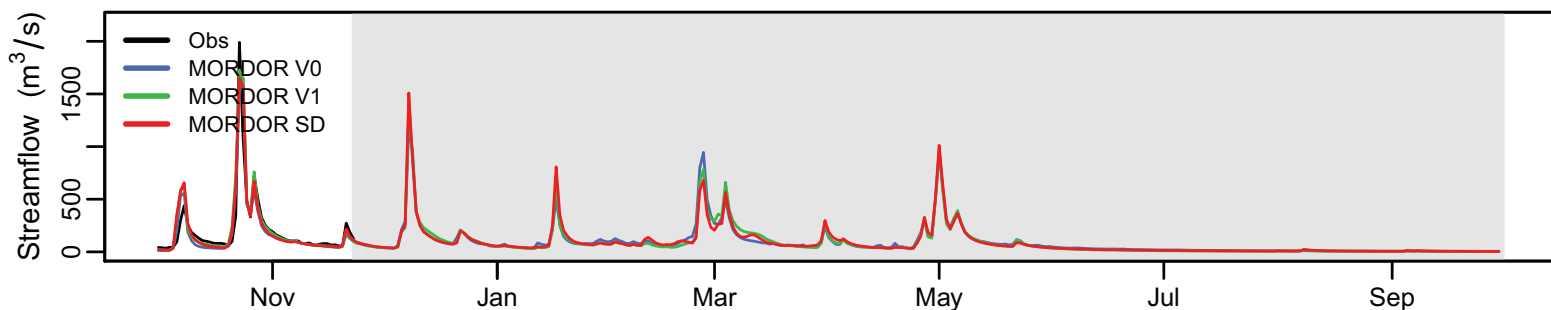

Year 1979

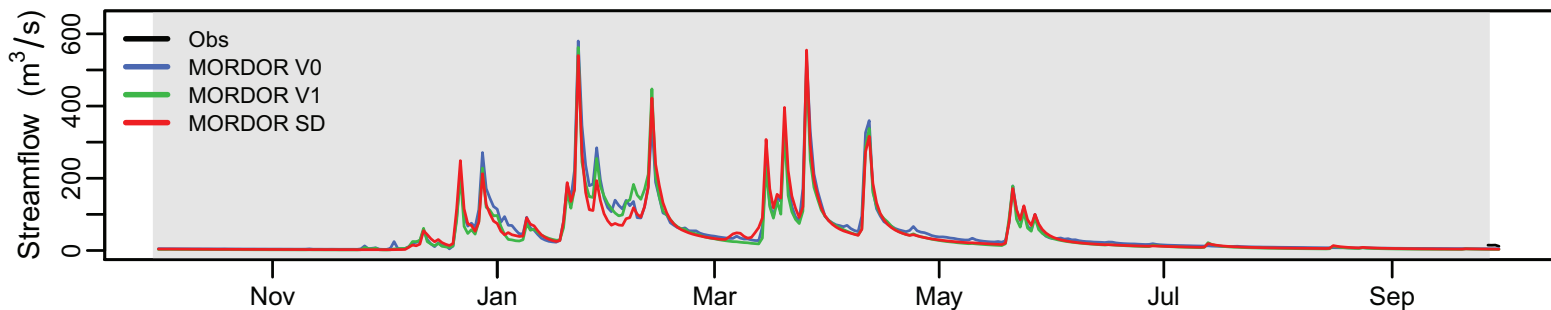

# Ardeche@Sauze

Year 1980

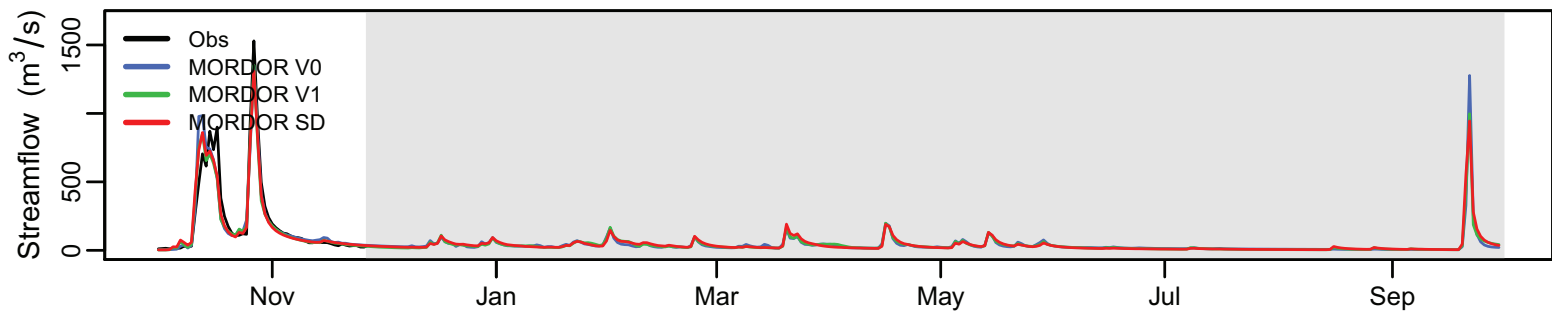

Year 1981

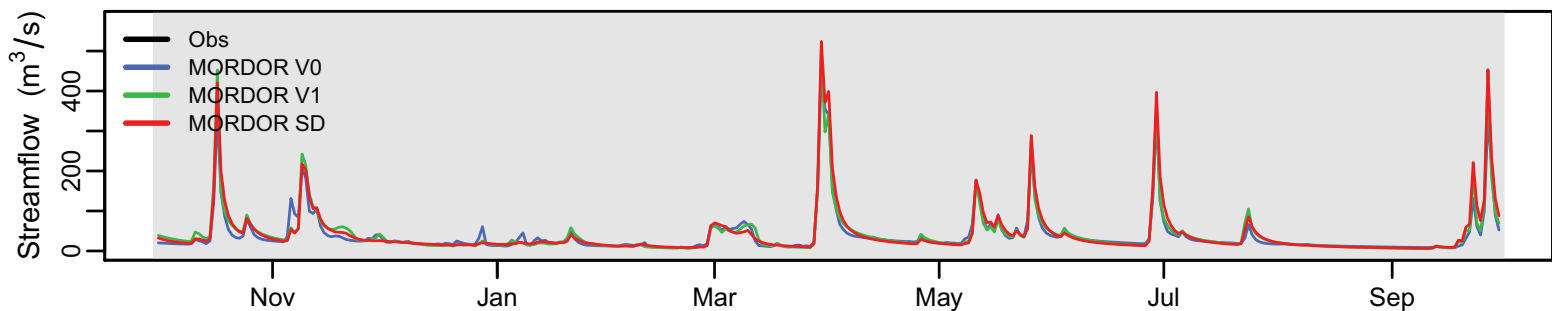

Year 1982

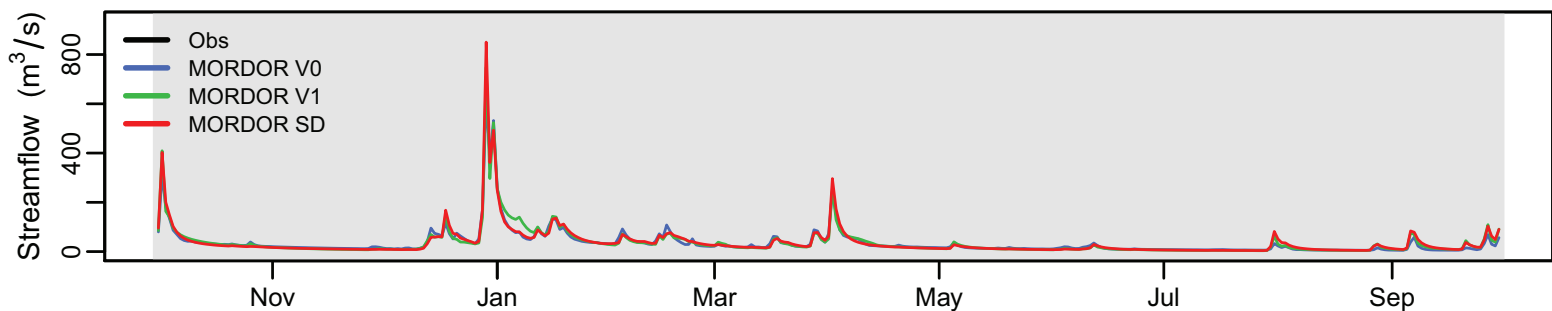

Year 1983

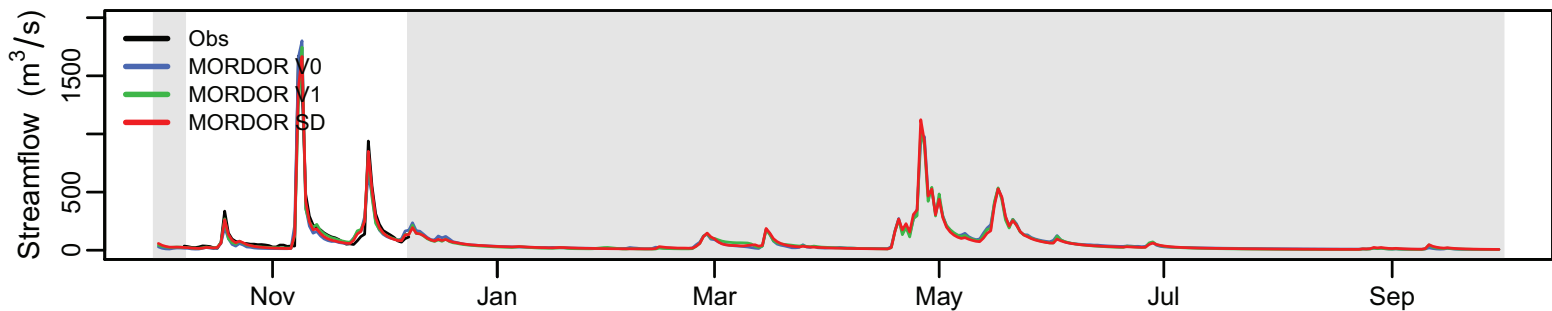

Year 1984

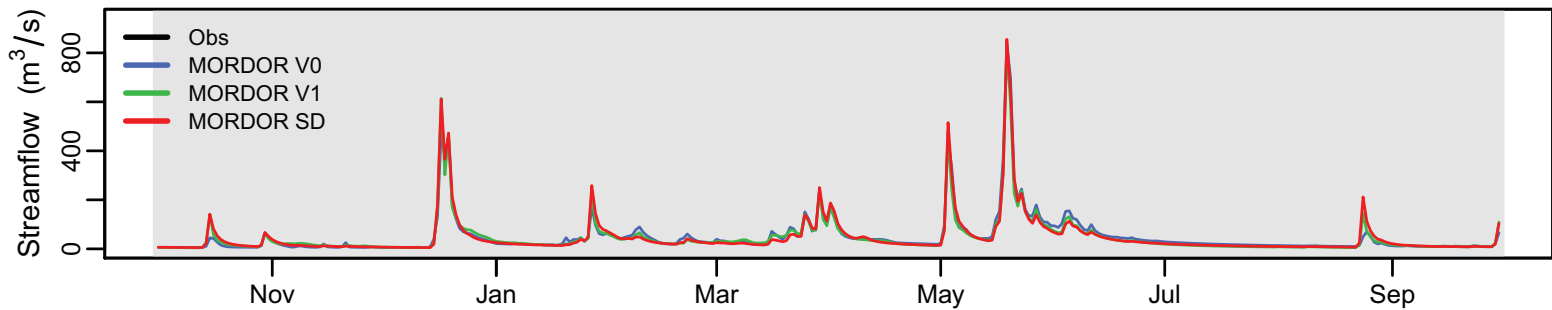

Year 1985

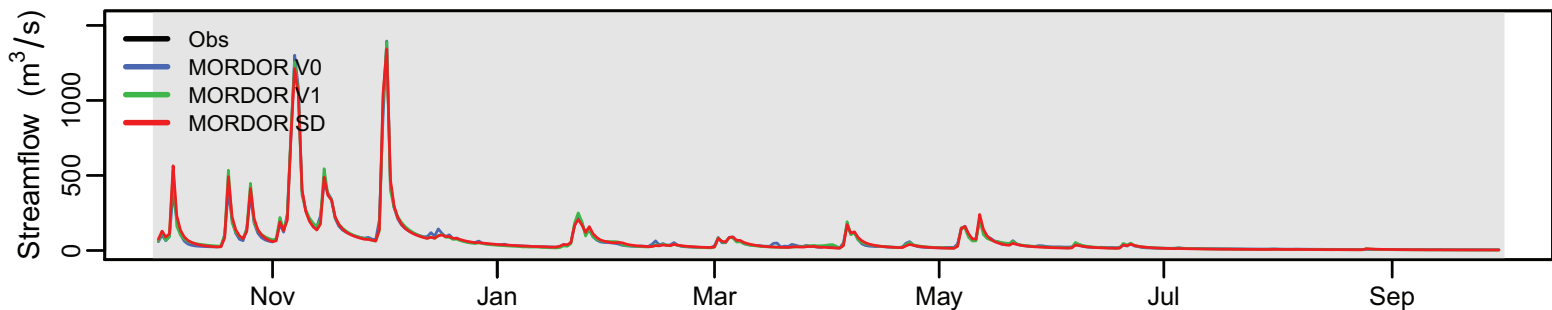

# Ardeche@Sauze

Year 1986

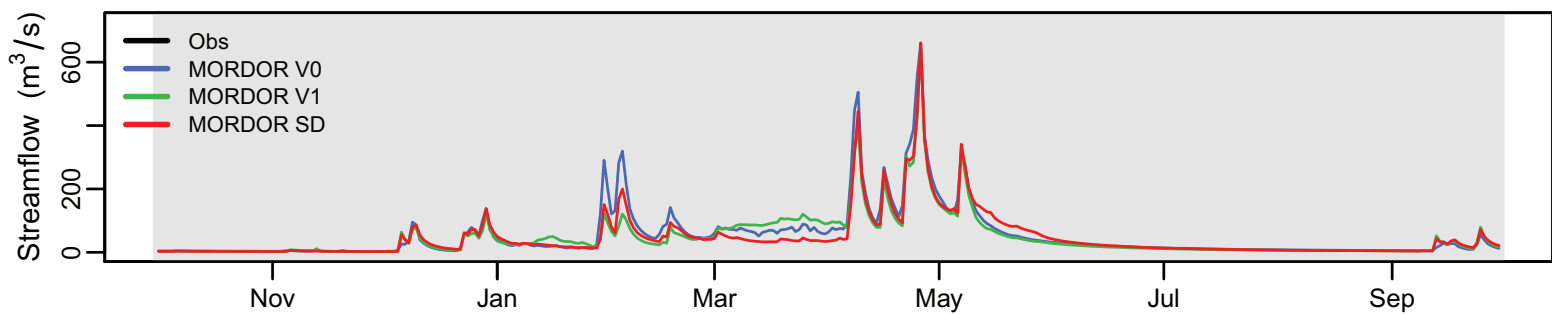

Year 1987

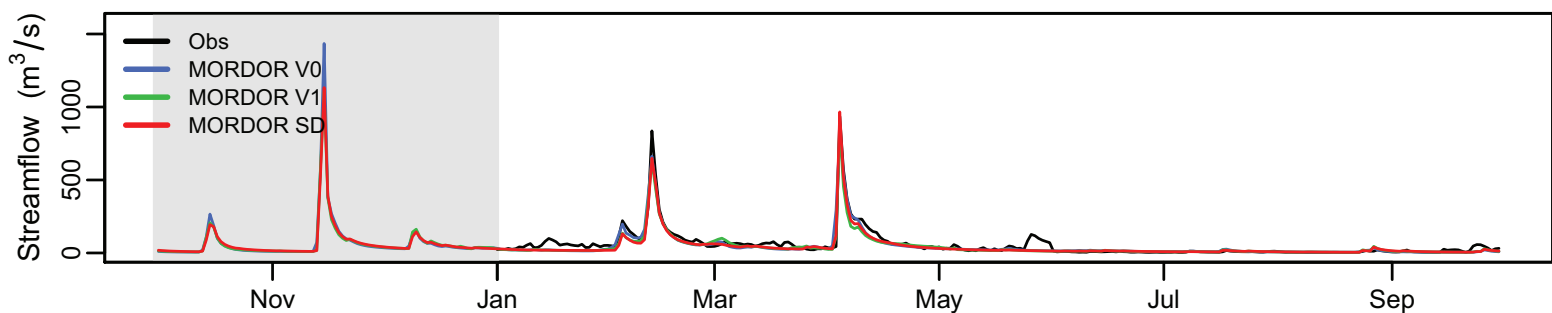

Year 1988

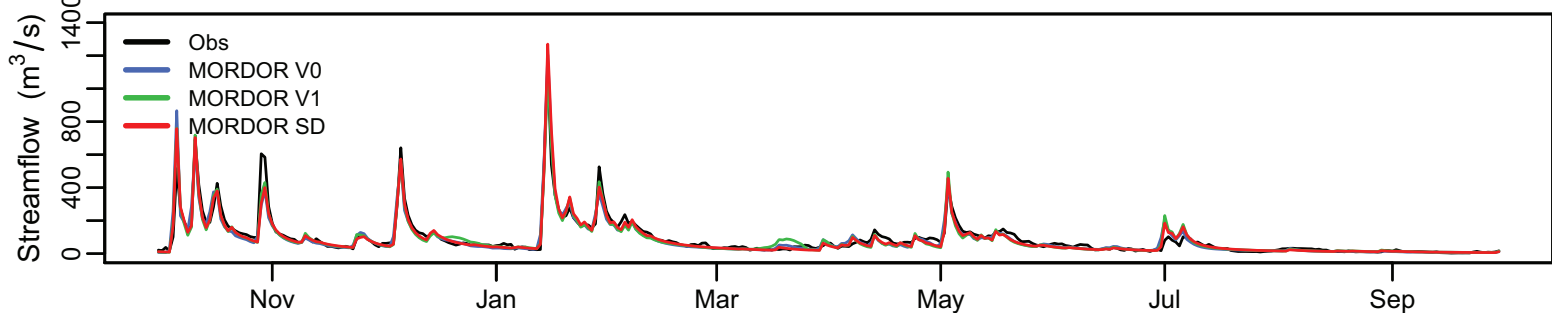

Year 1989

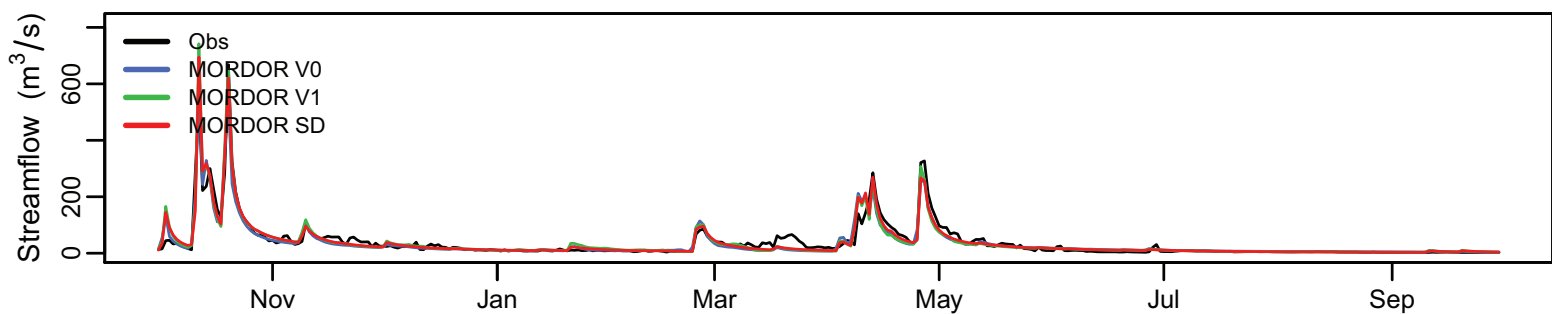

Year 1990

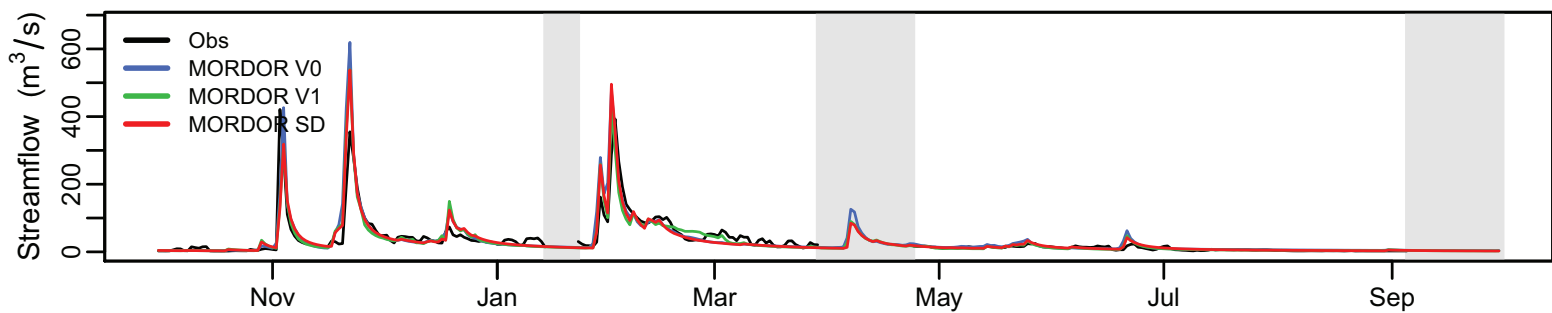

Year 1991

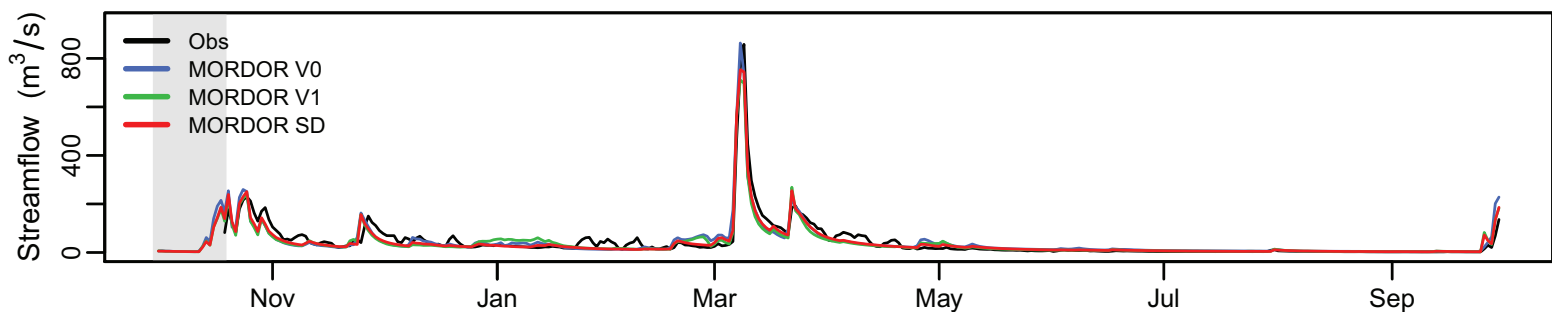

# Ardeche@Sauze

Year 1992

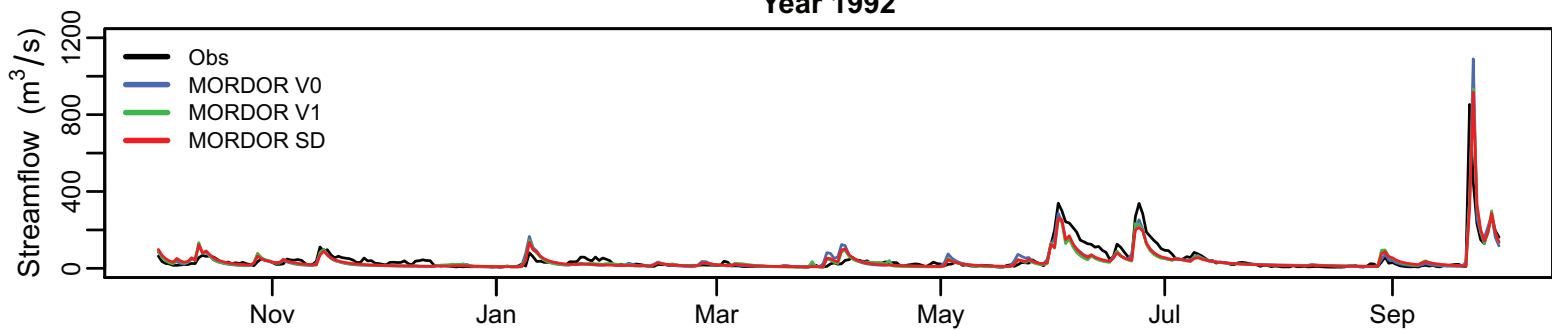

Year 1993

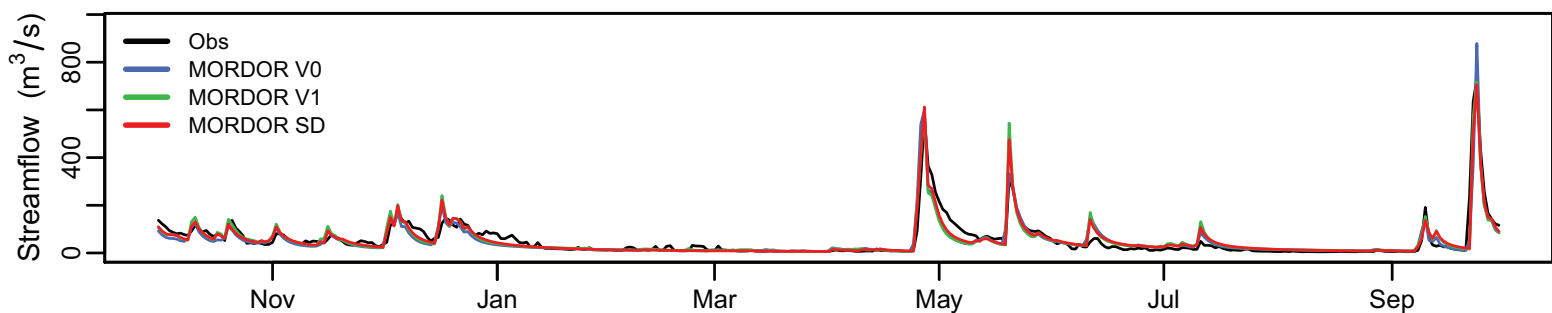

Year 1994

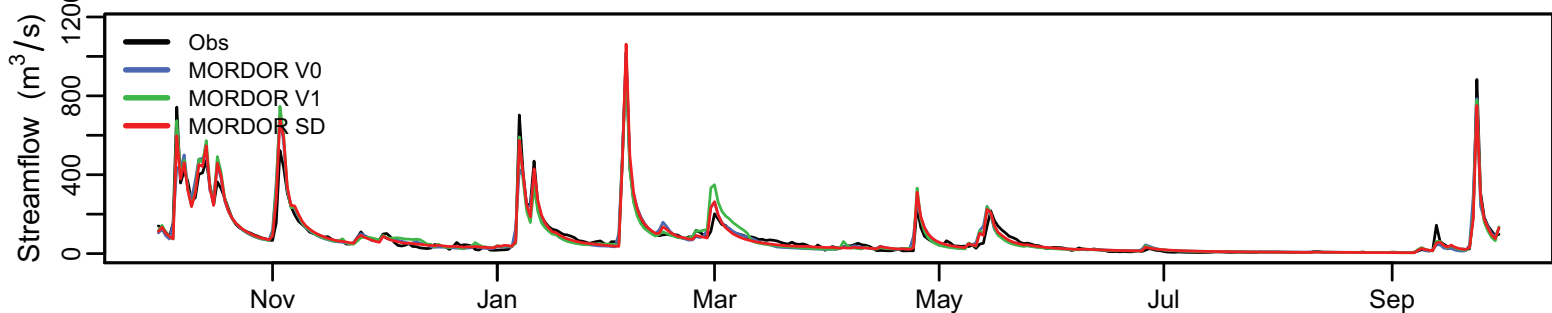

Year 1995

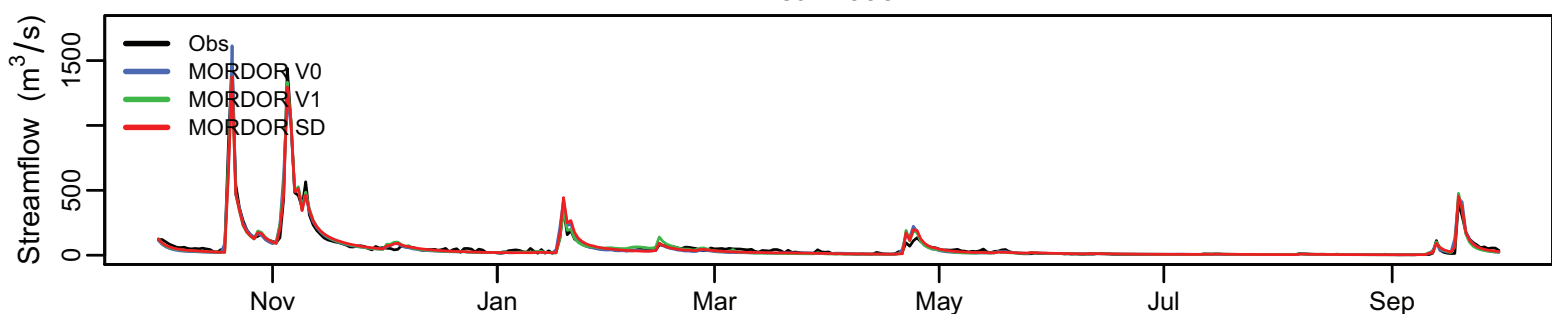

Year 1996

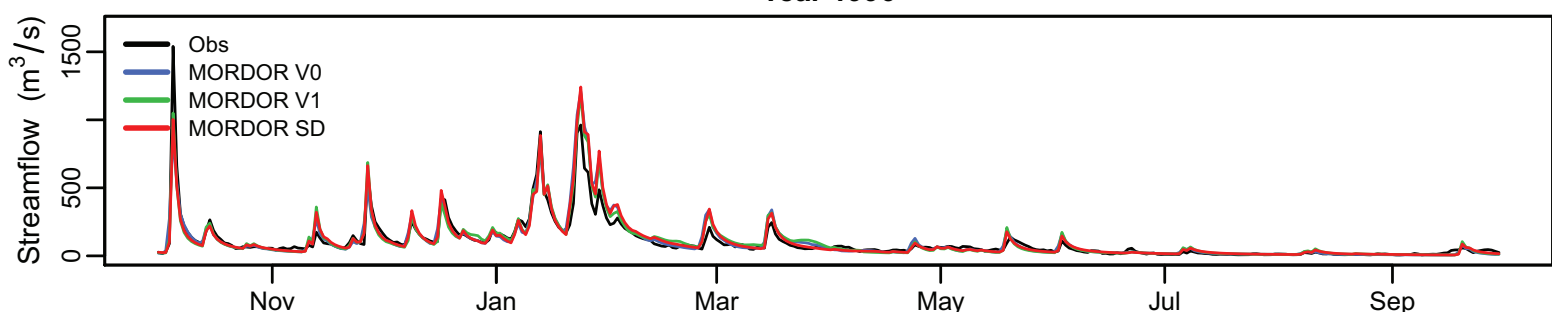

Year 1997

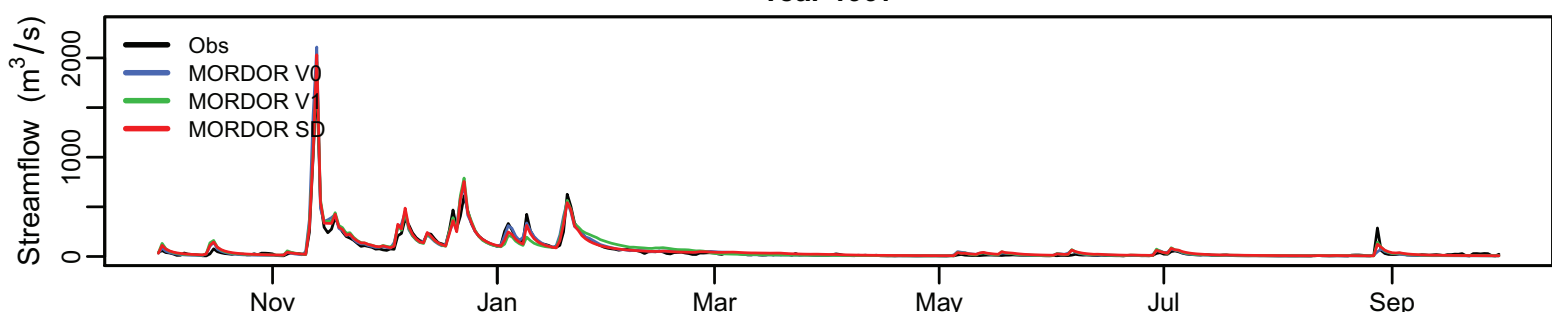

# Ardeche@Sauze

Year 1998

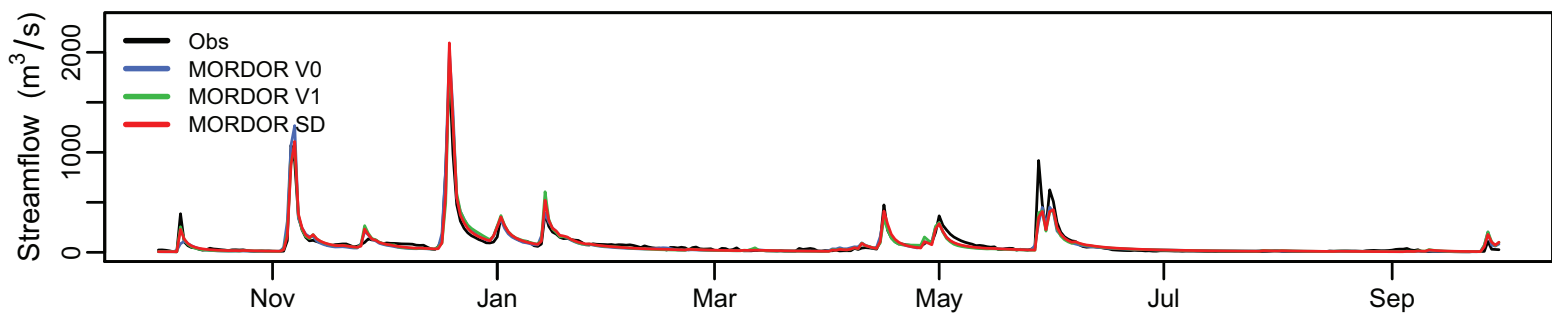

Year 1999

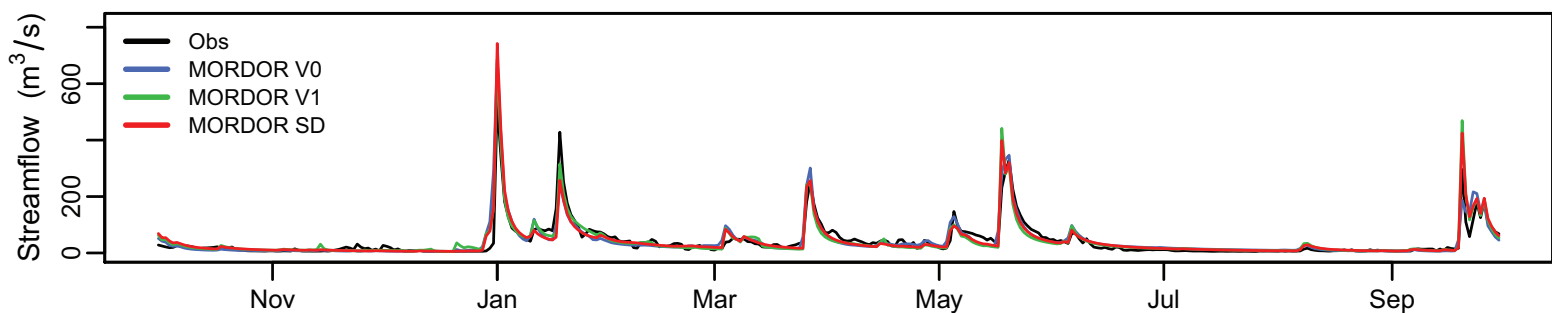

Year 2000

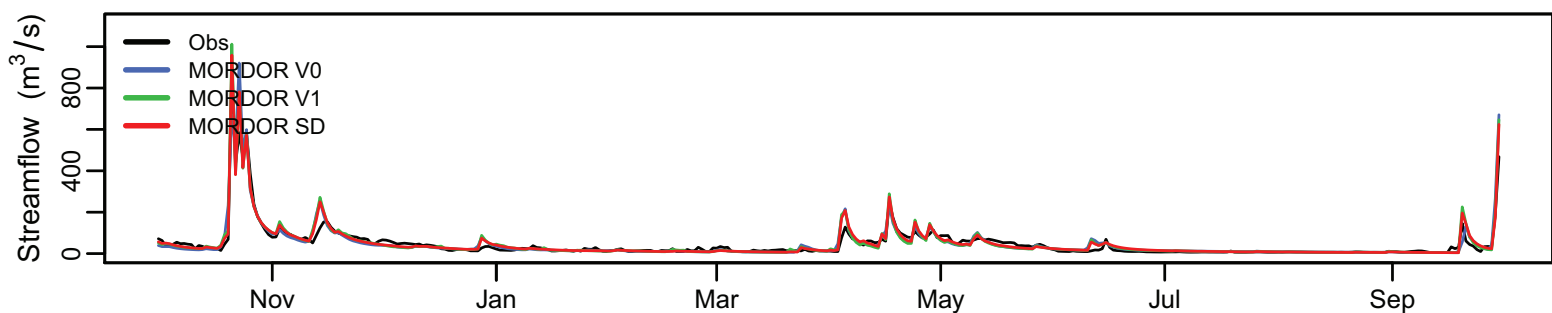

Year 2001

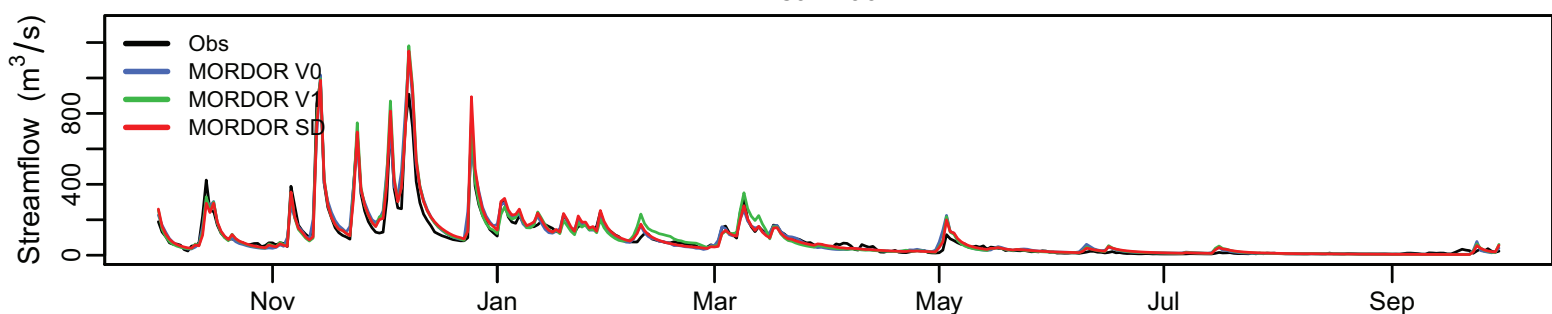

Year 2002

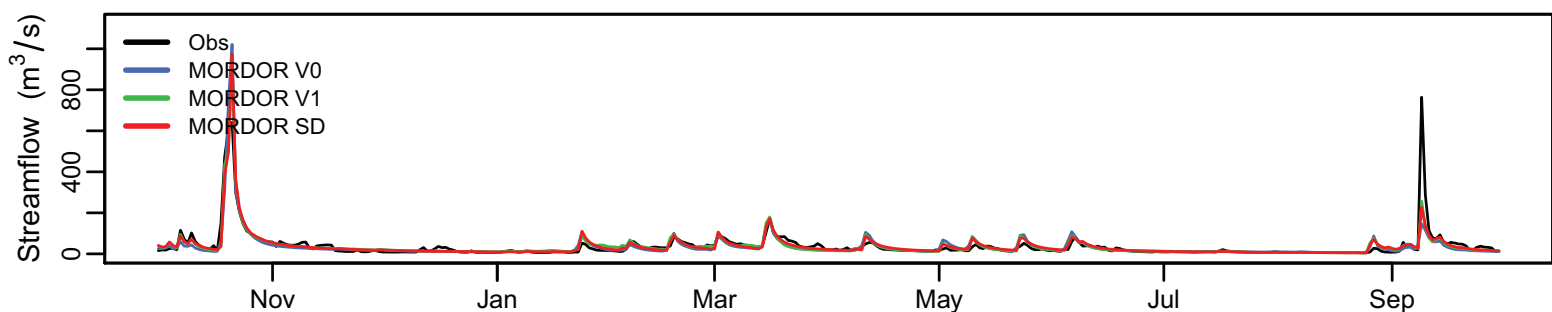

Year 2003

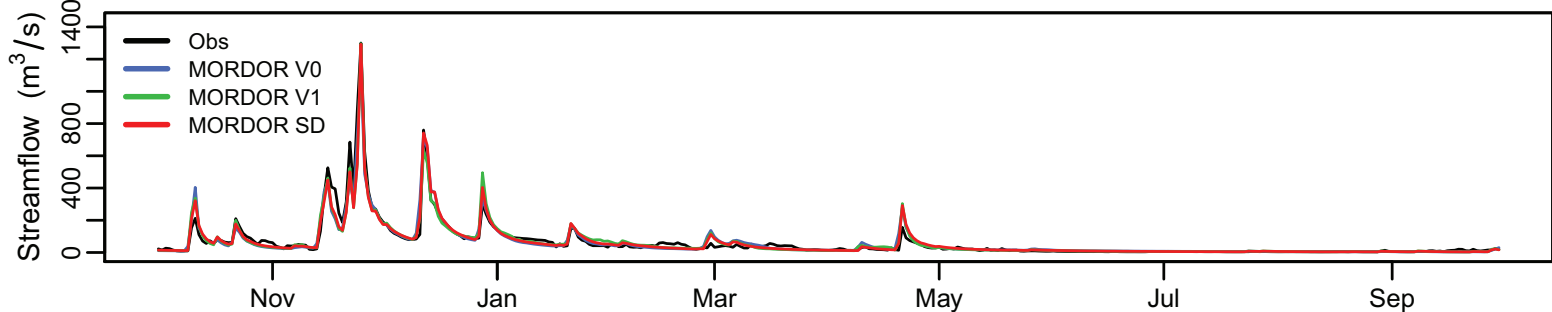

# Ardeche@Sauze

Year 2004

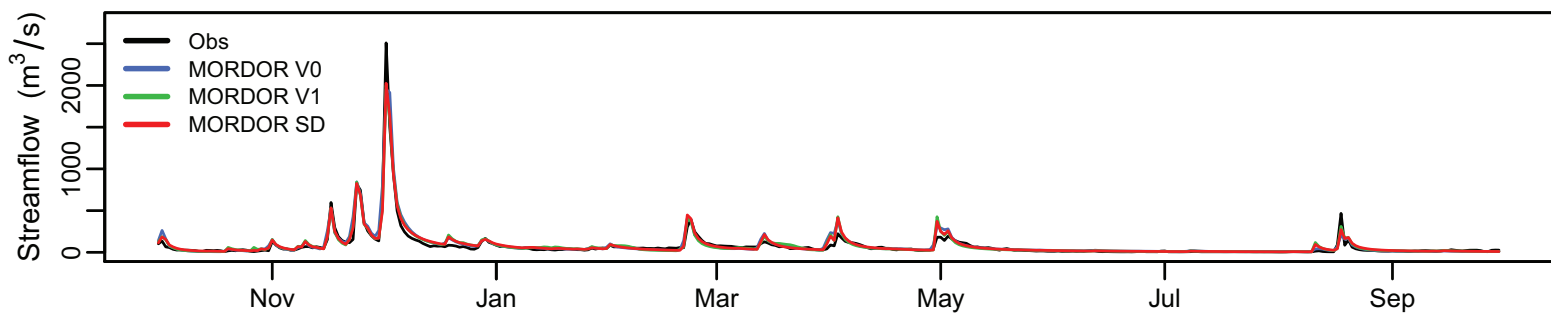

Year 2005

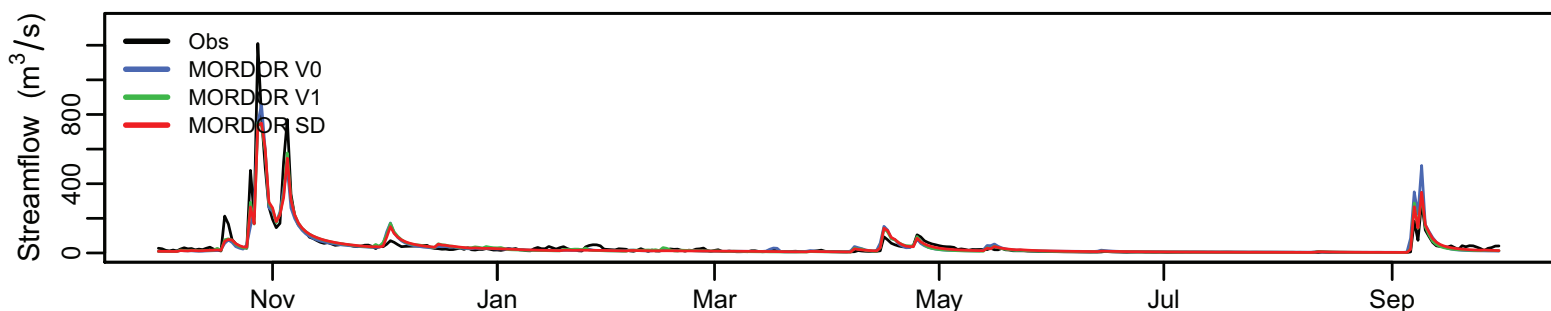

Year 2006

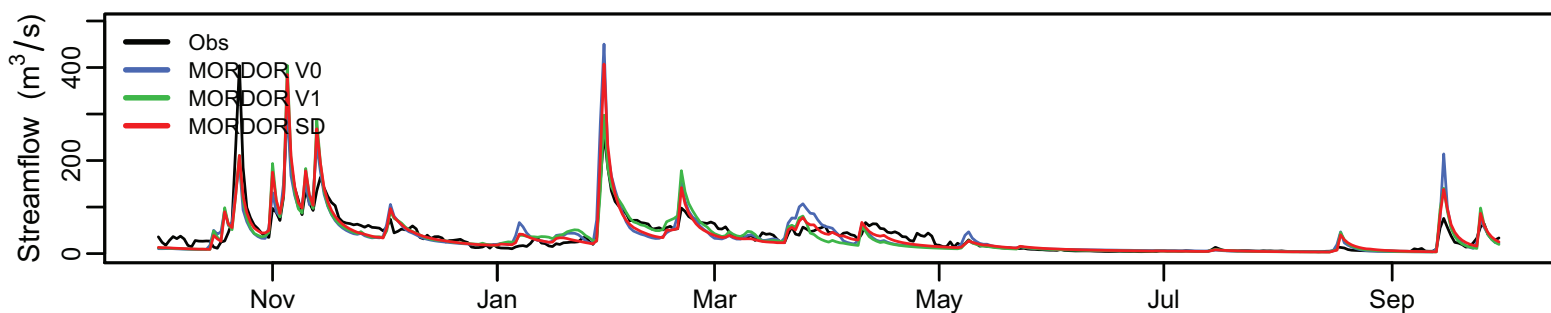

Year 2007

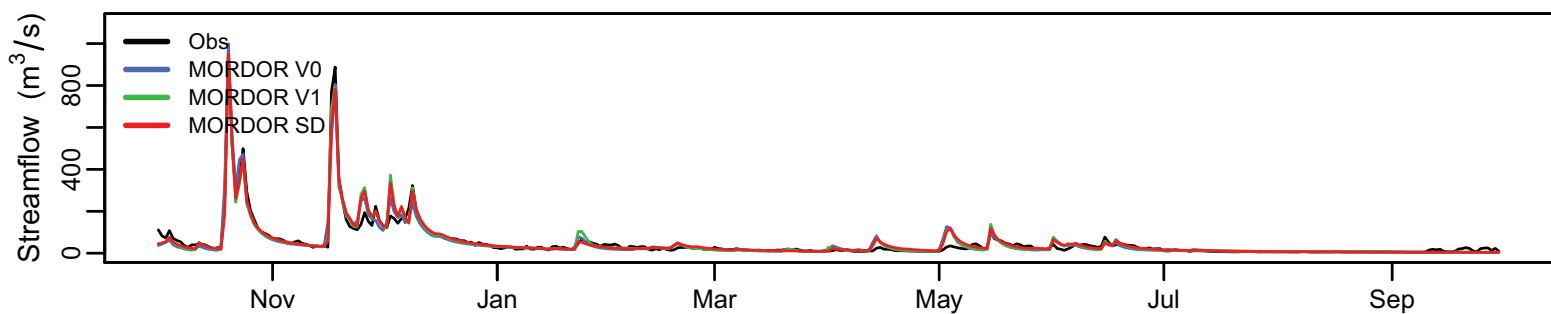

Year 2008

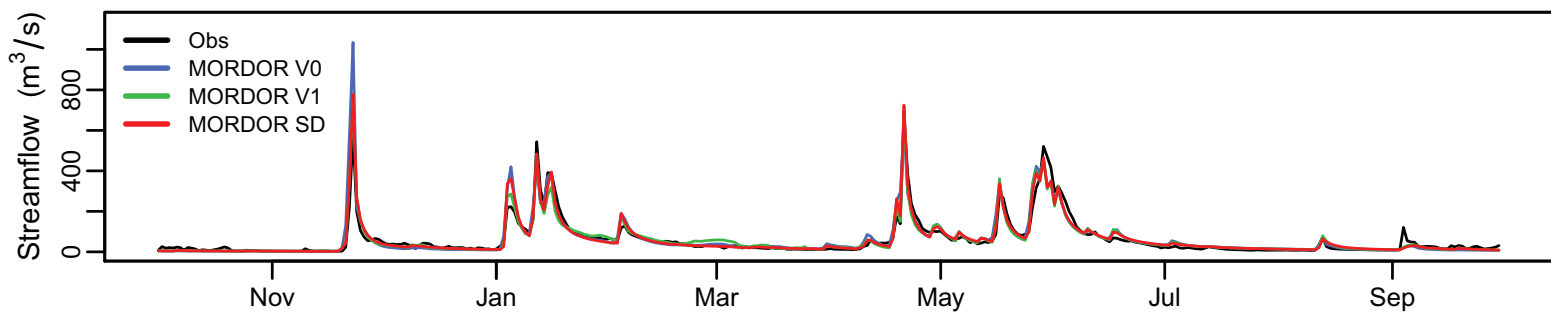

# Arn@Taillasses

Year 1988

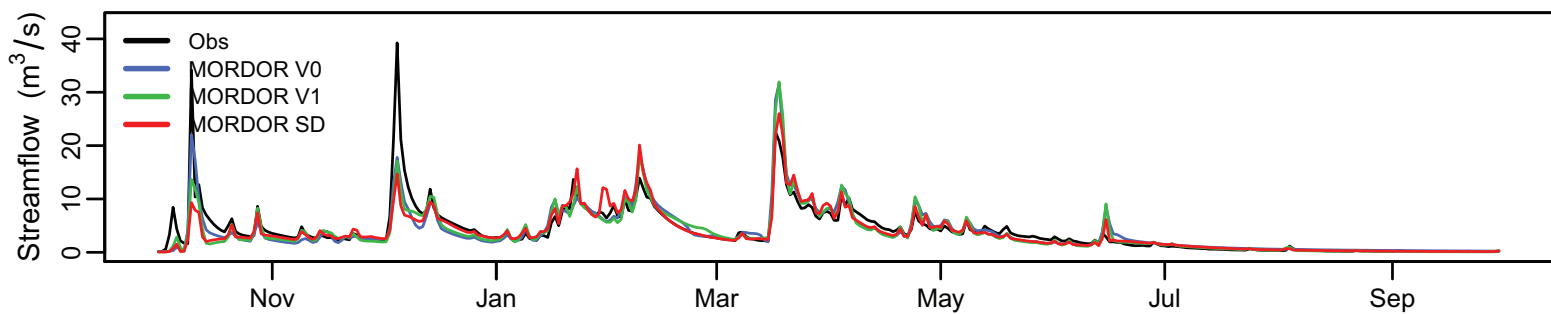

Year 1989

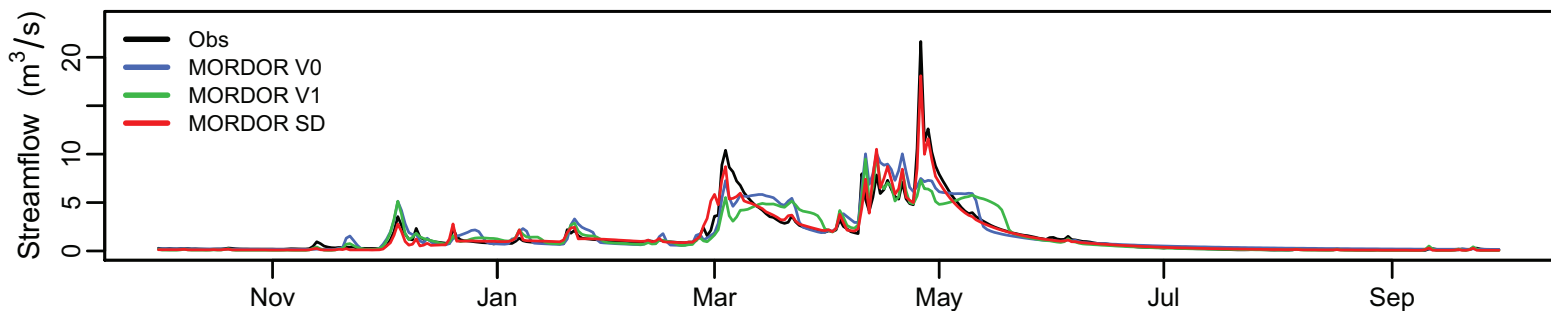

Year 1990

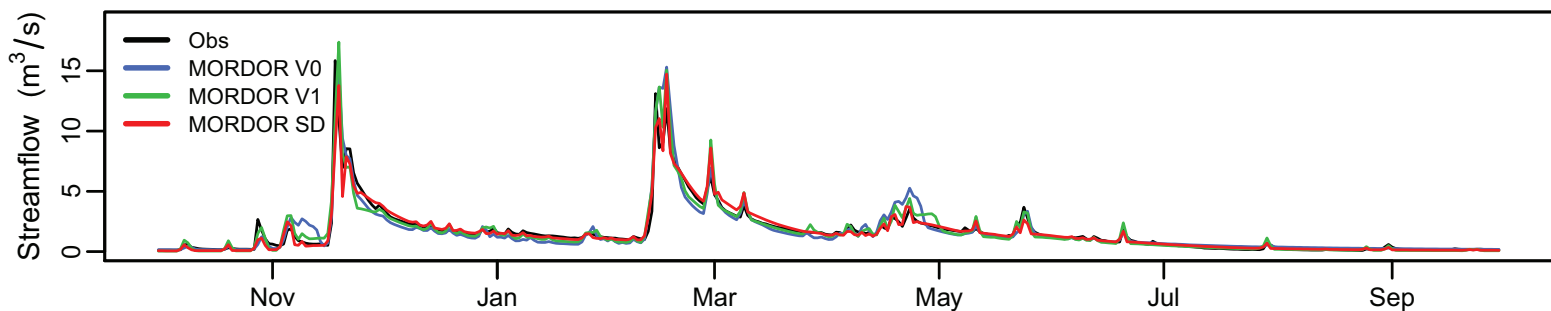

Year 1991

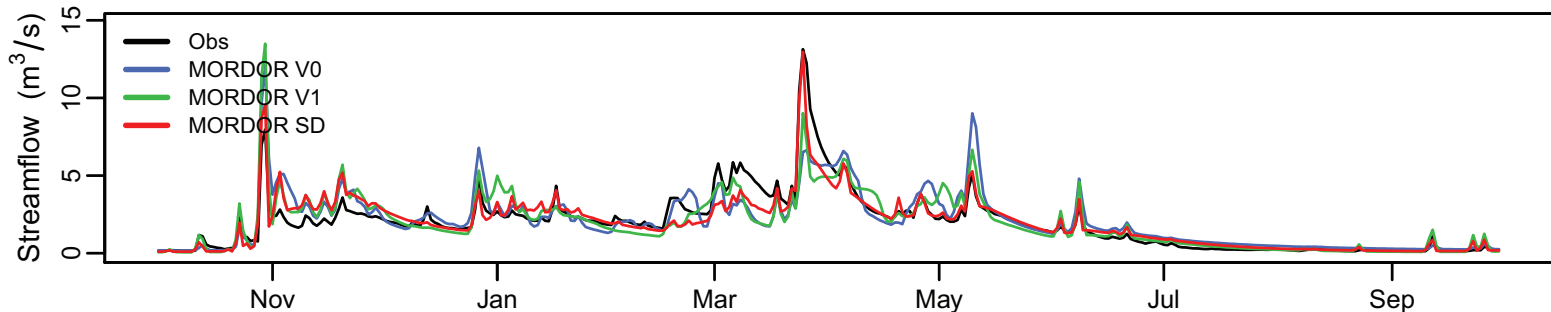

Year 1992

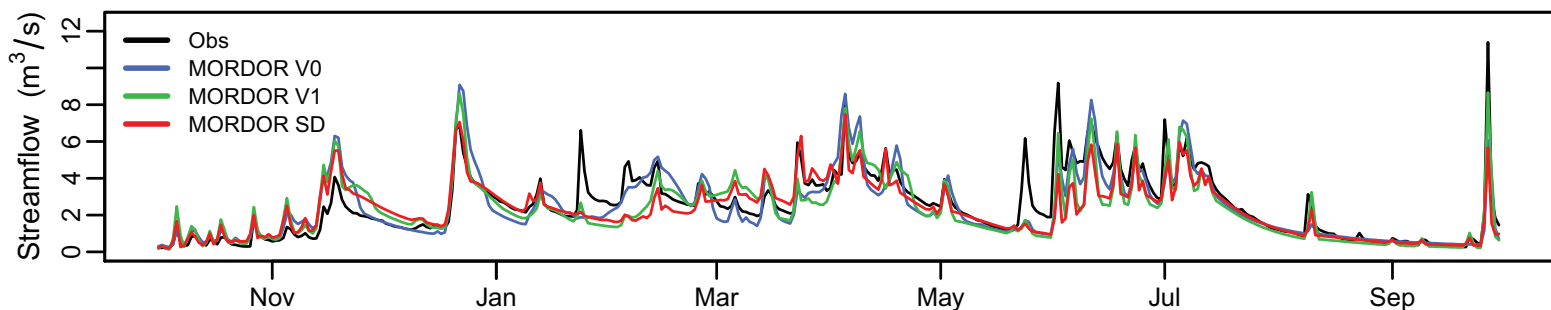

Year 1993

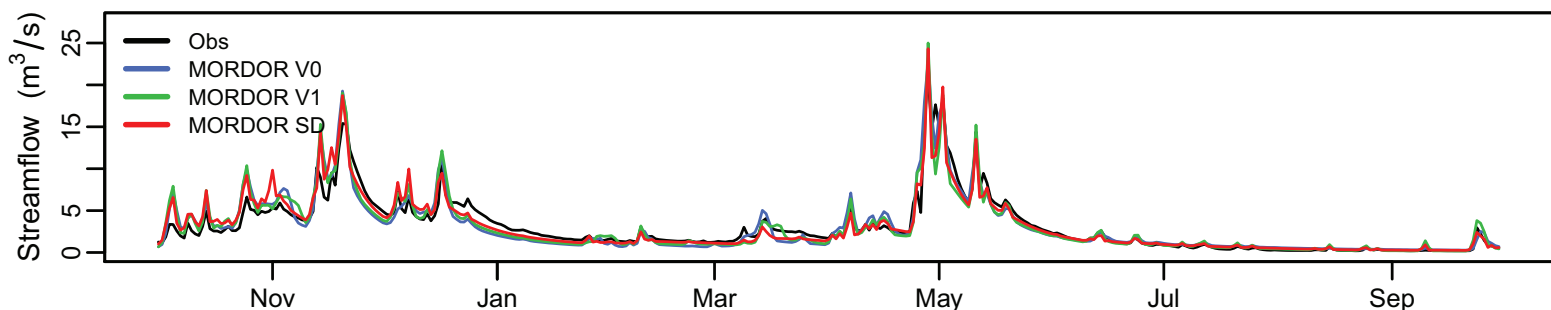

# Arn@Taillasses

Year 1994

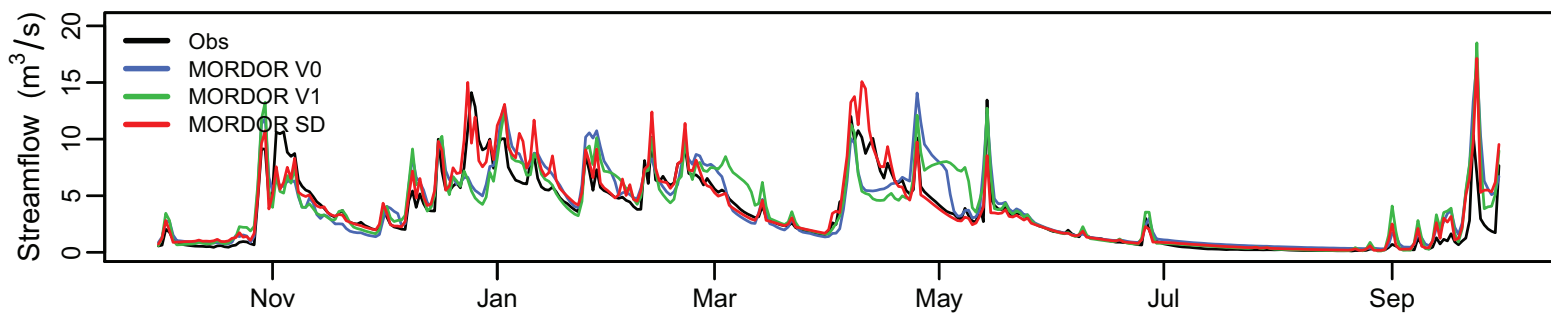

Year 1995

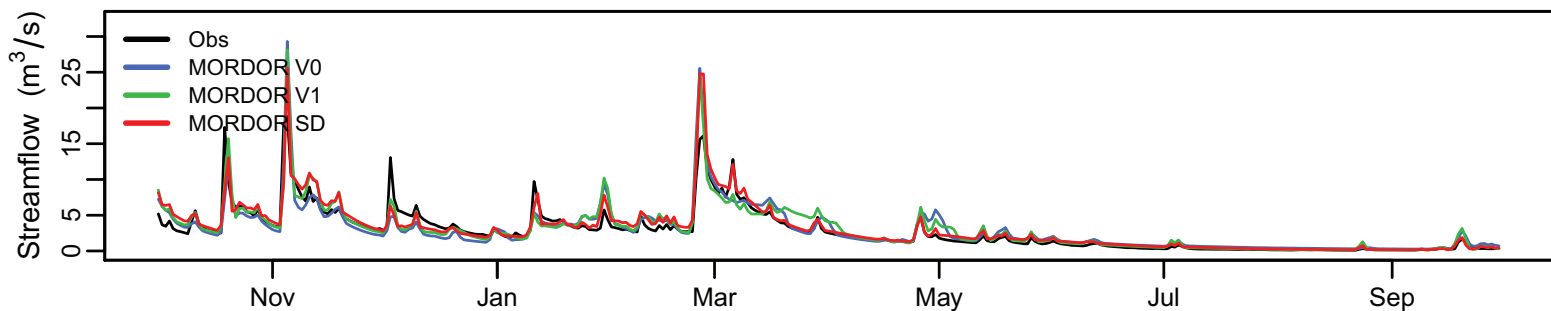

Year 1996

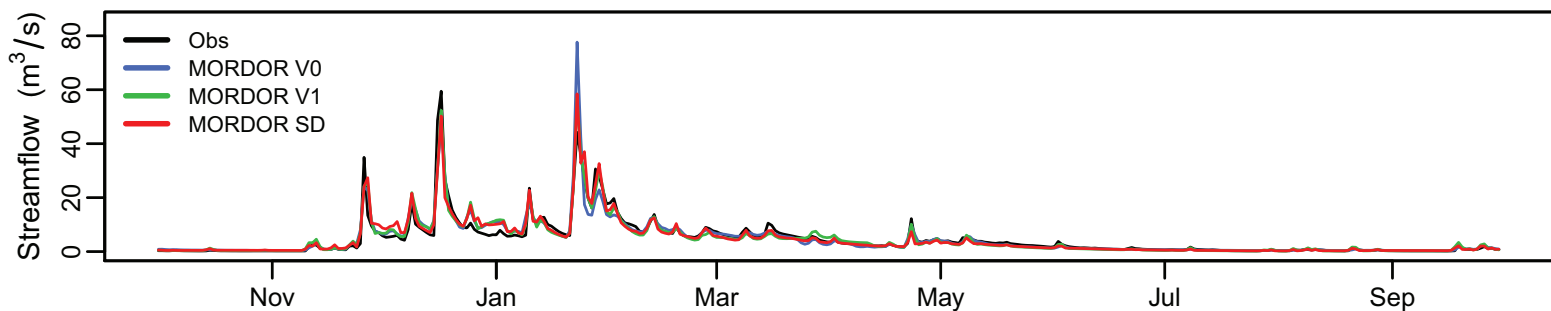

Year 1997

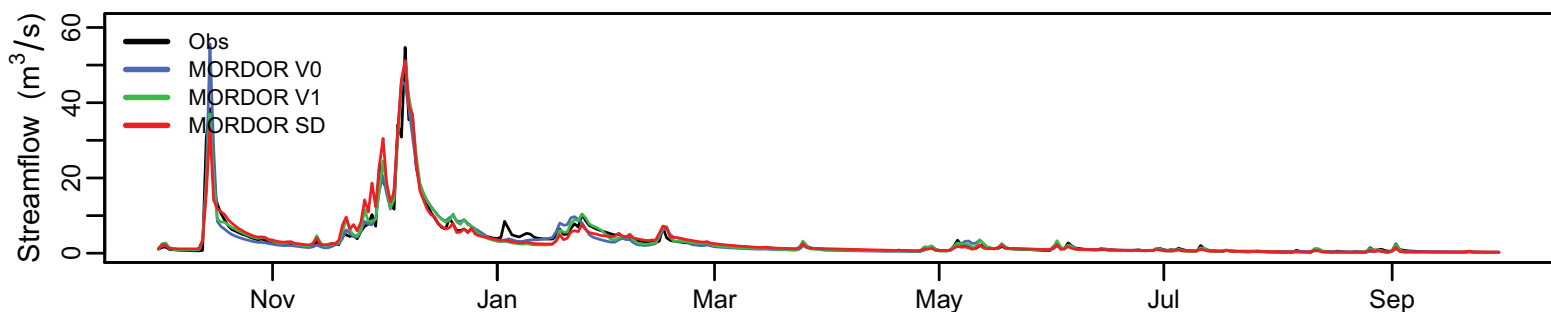

Year 1998

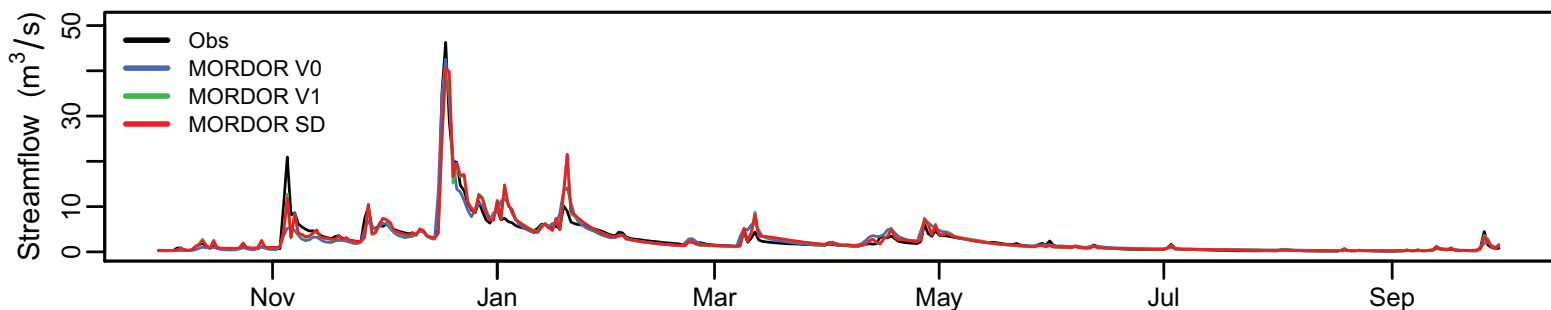

Year 1999

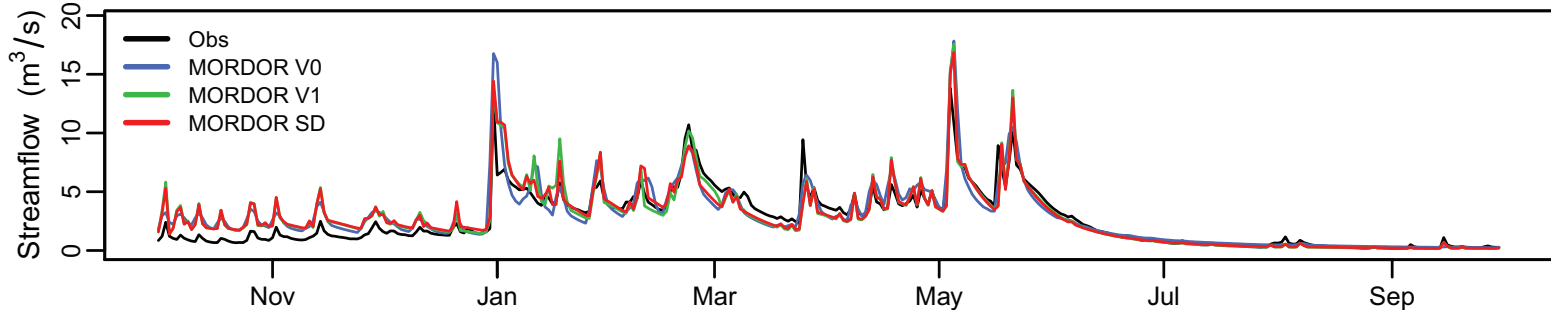



# Arn@Taillasses

Year 2000

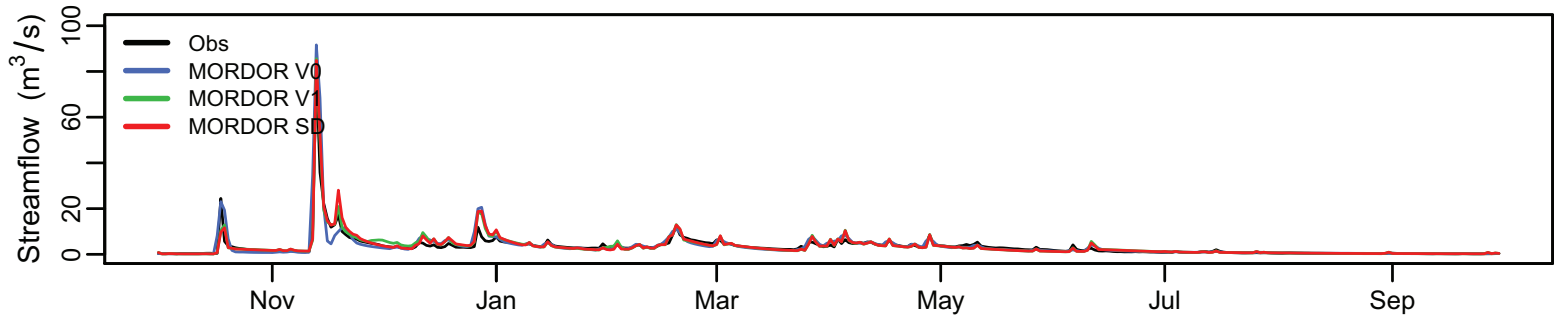

Year 2001

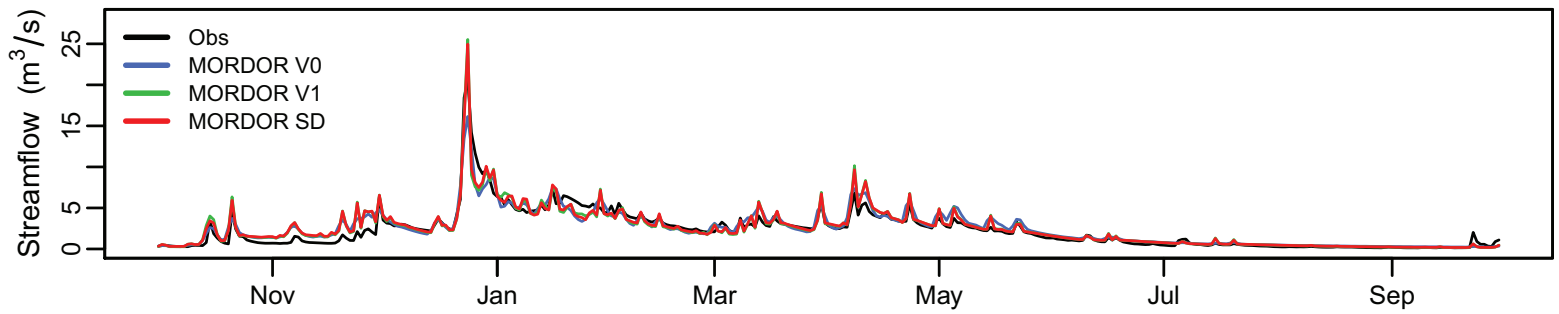

Year 2002

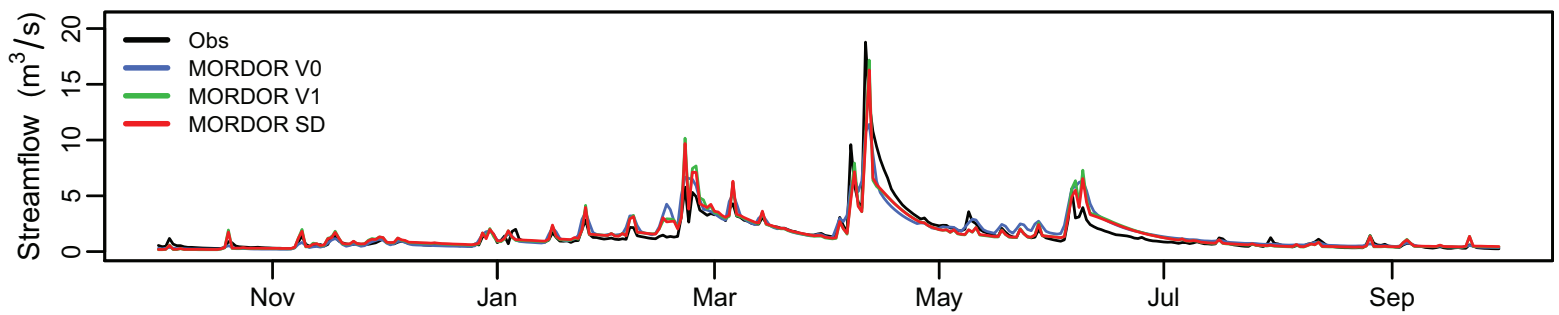

Year 2003

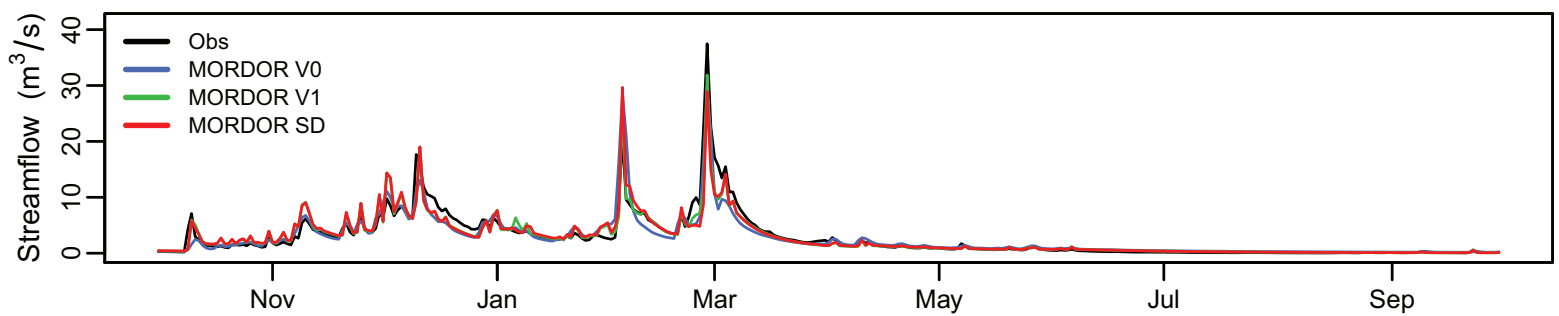

Year 2004

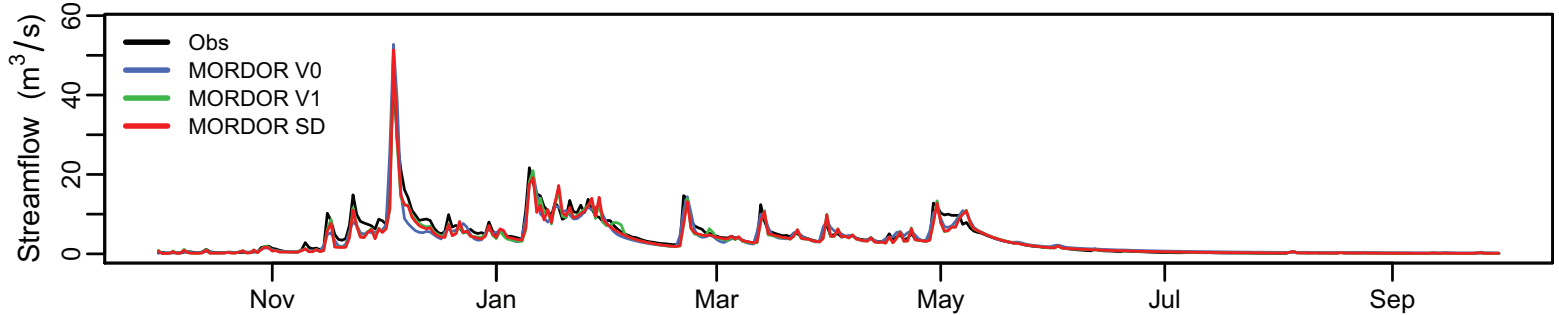

Year 2005

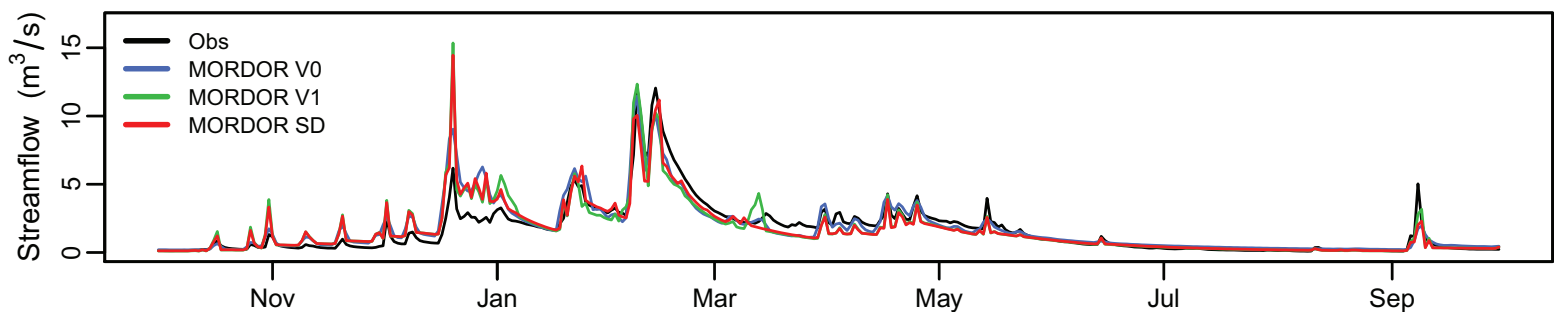

# Arn@Taillades

Year 2006

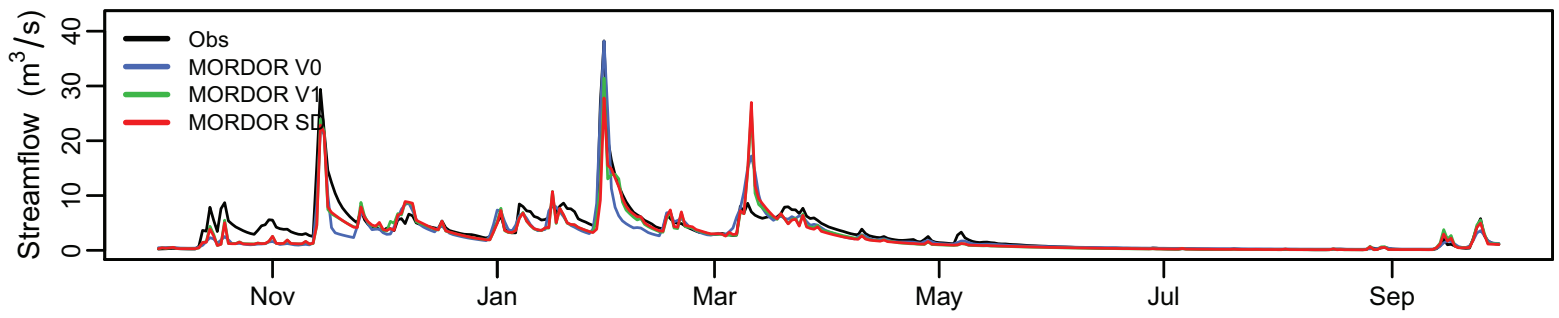

Year 2007

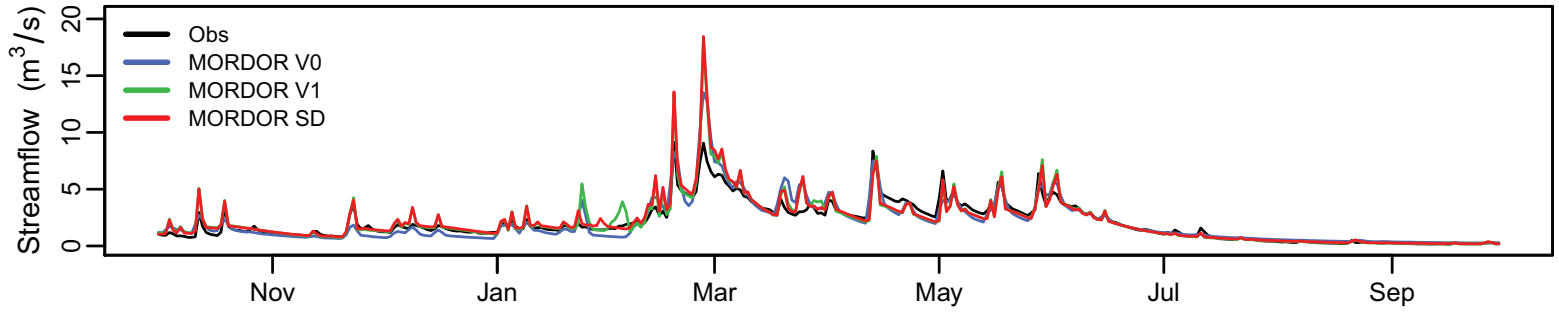

# Arve@Arthaz

Year 1987

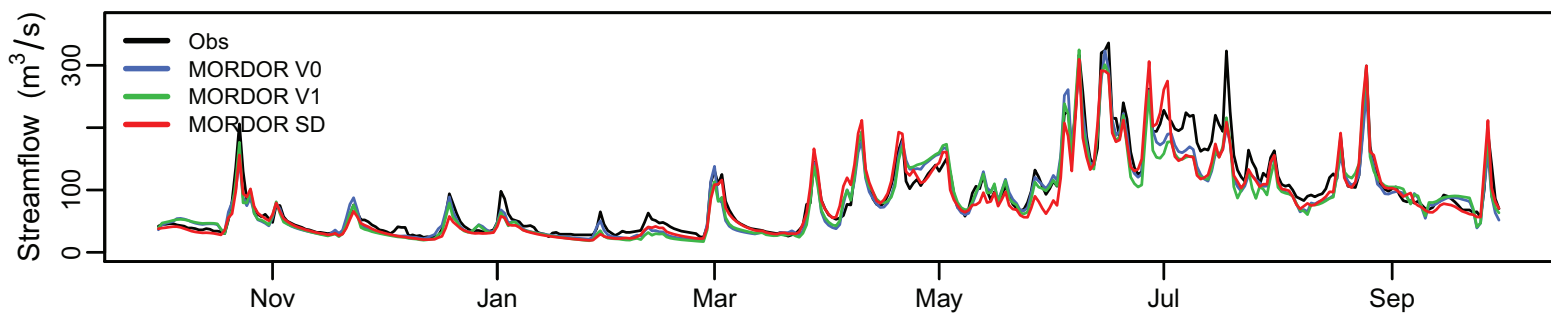

Year 1988

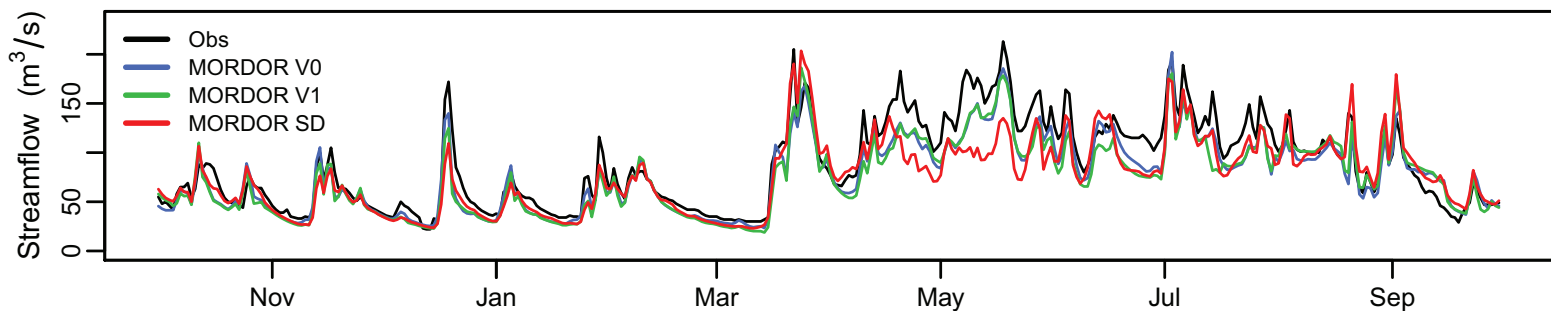

Year 1989

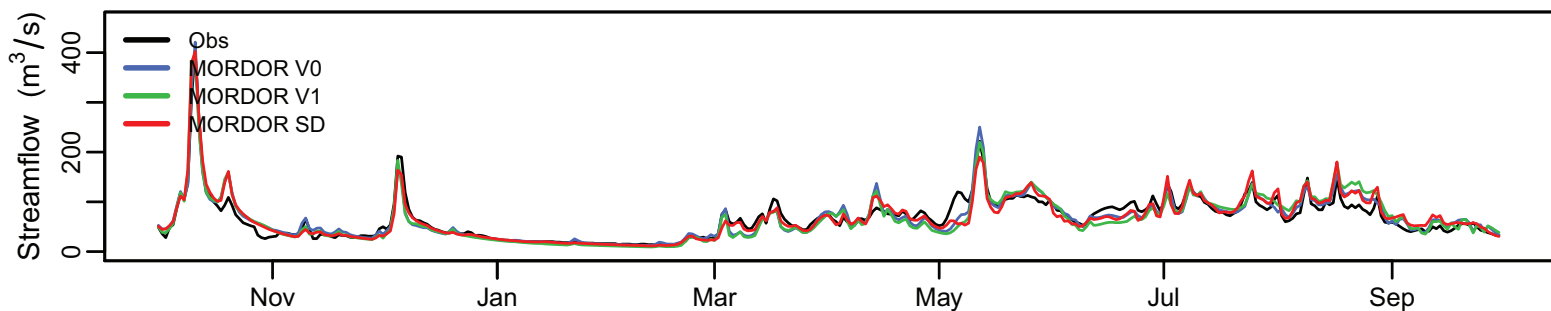

Year 1990

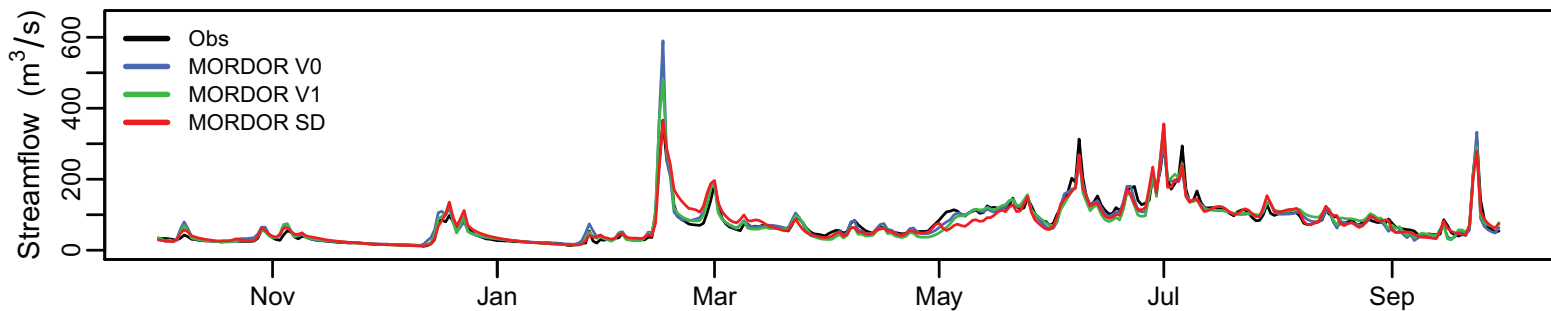

Year 1991

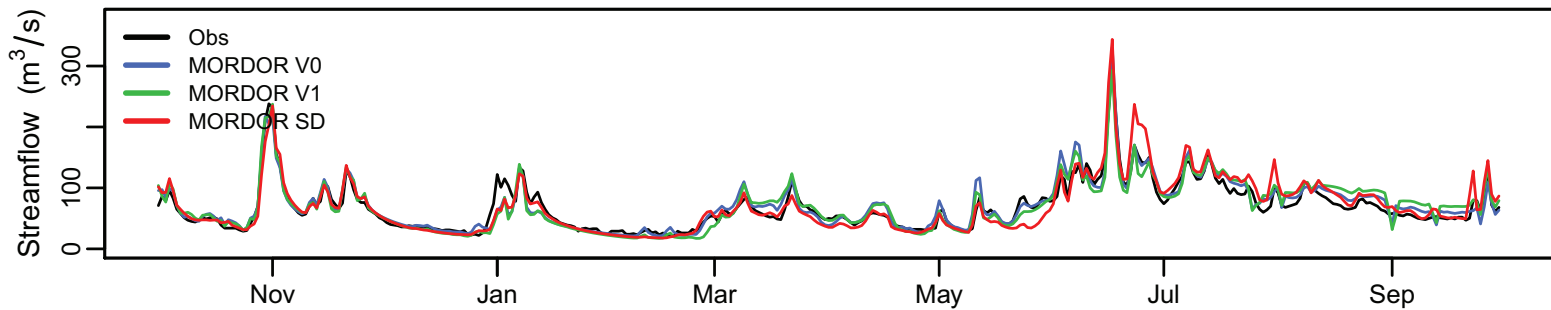

Year 1992

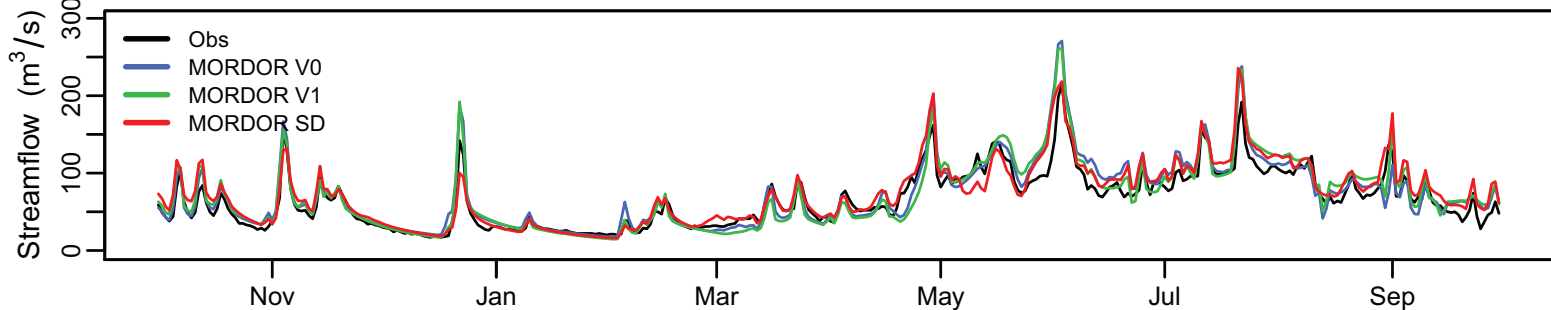

# Arve@Arthaz

Year 1993

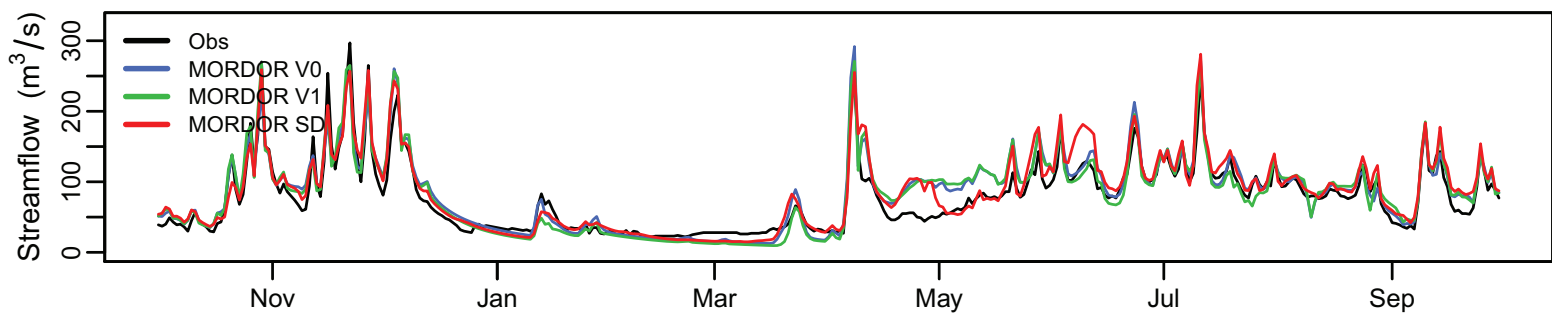

Year 1994

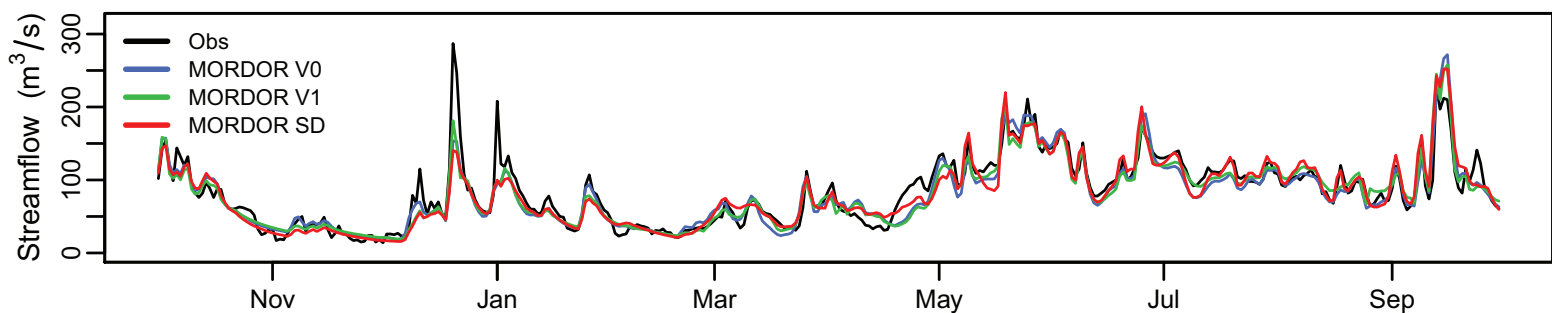

Year 1995

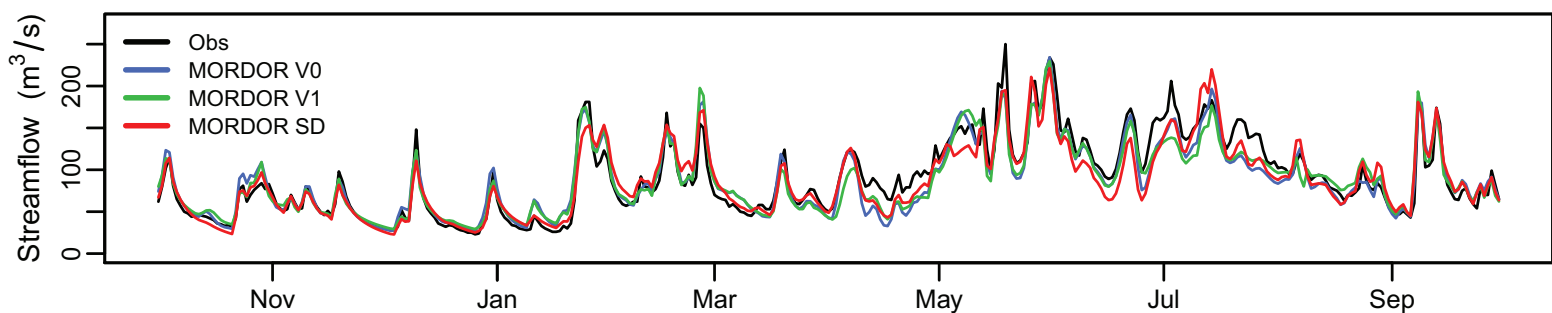

Year 1996

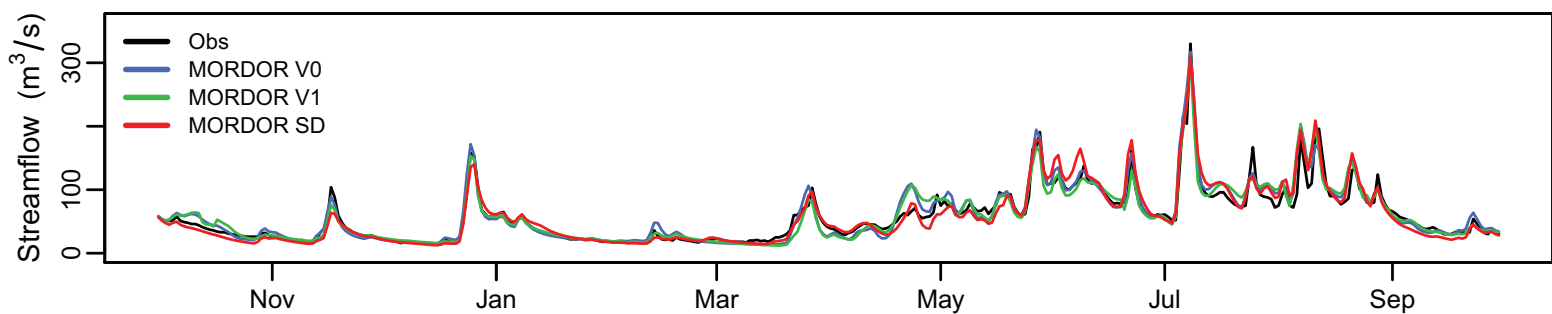

Year 1997

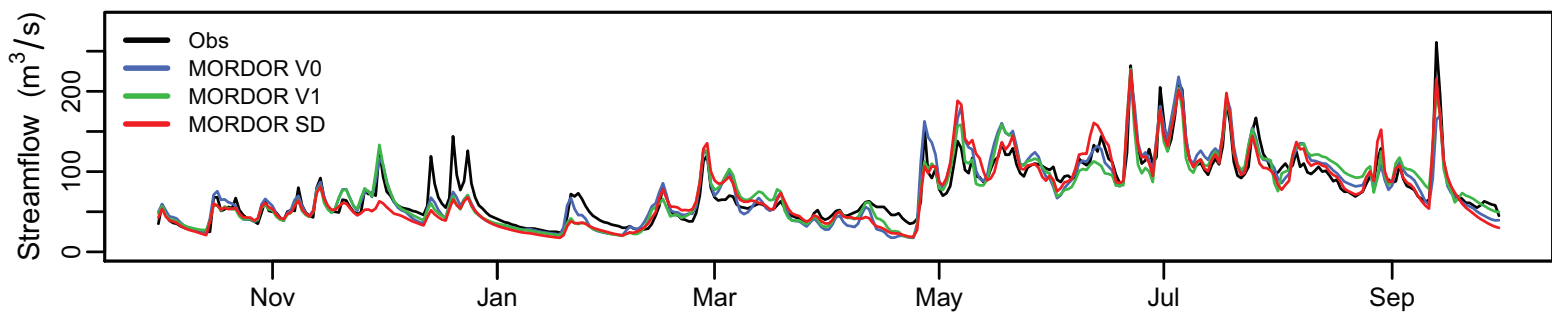

Year 1998

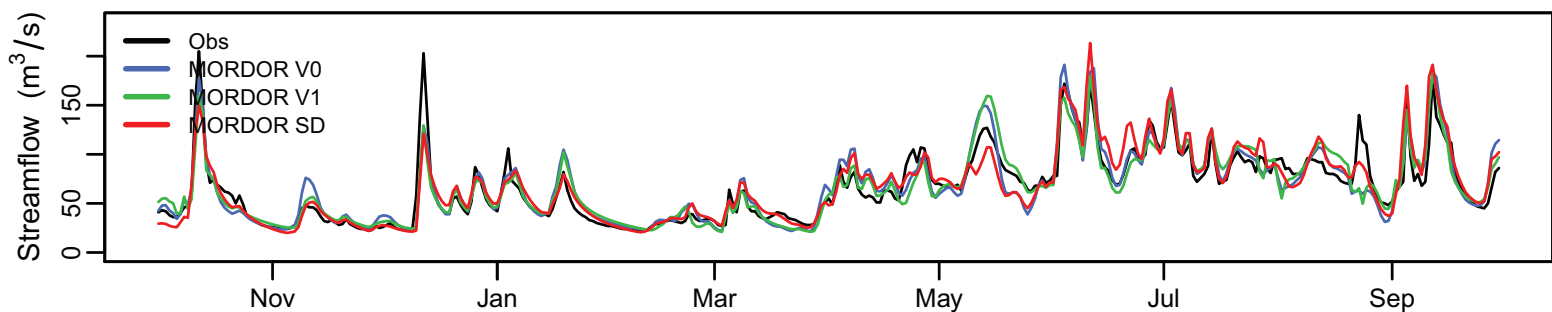

# Arve@Arthaz

Year 1999

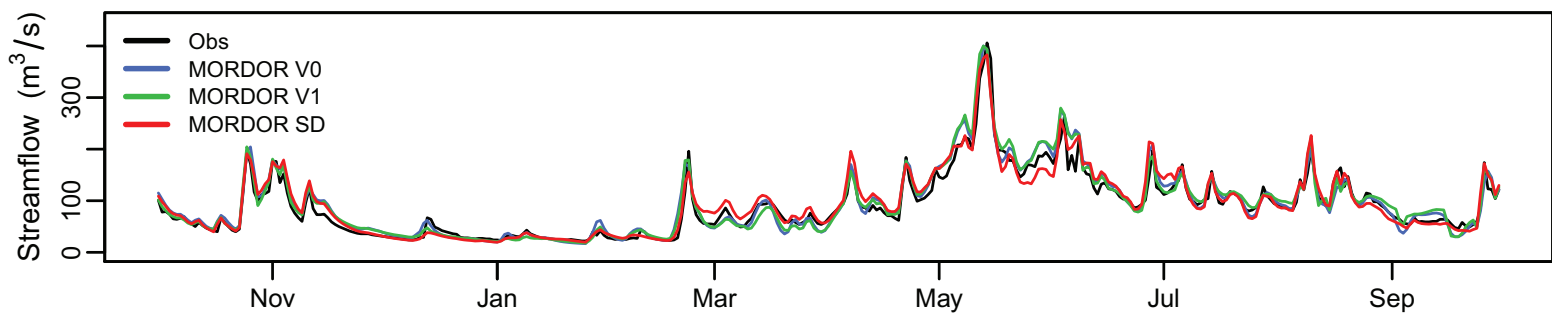

Year 2000

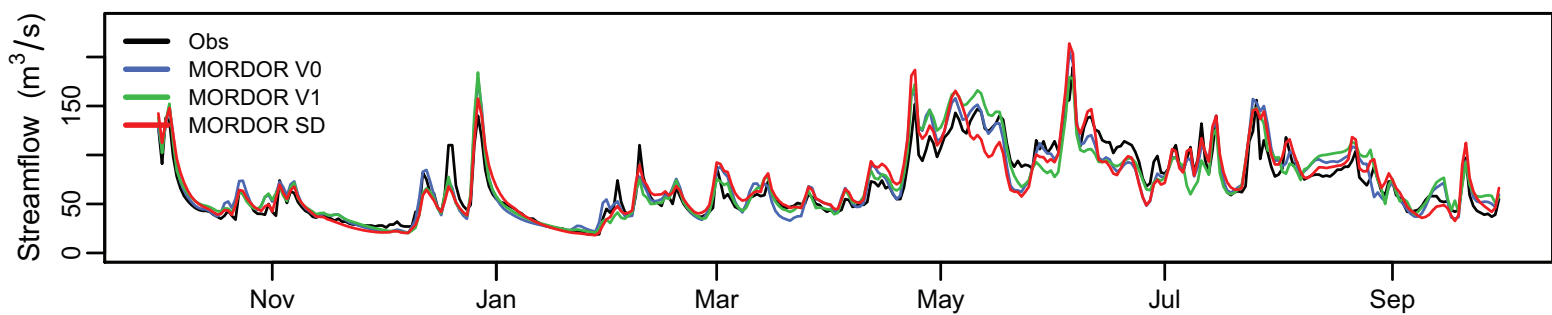

# Behine@LaPoutroie

Year 1985

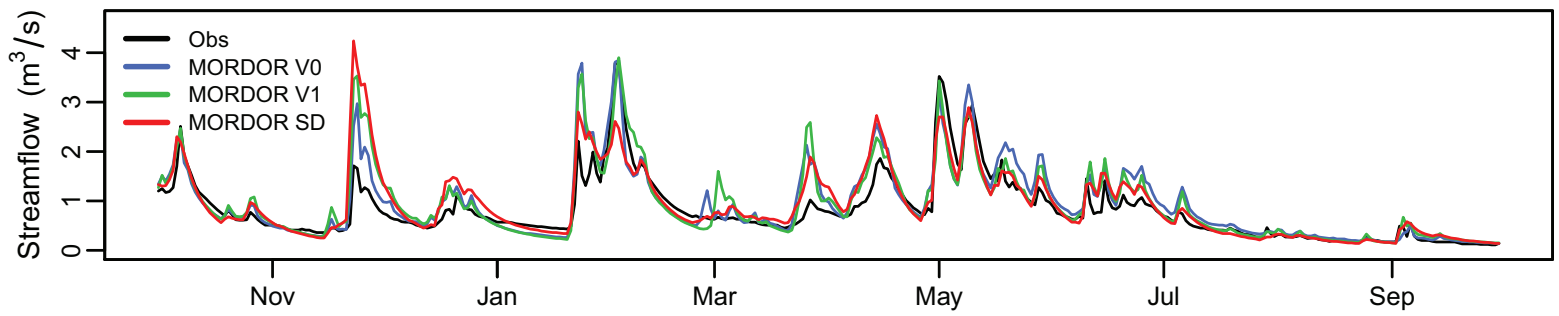

Year 1986

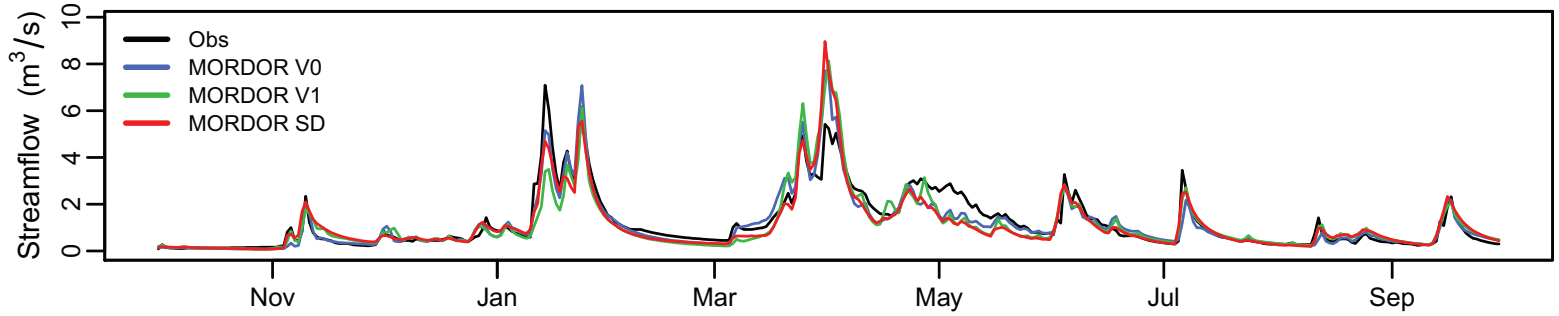

Year 1987

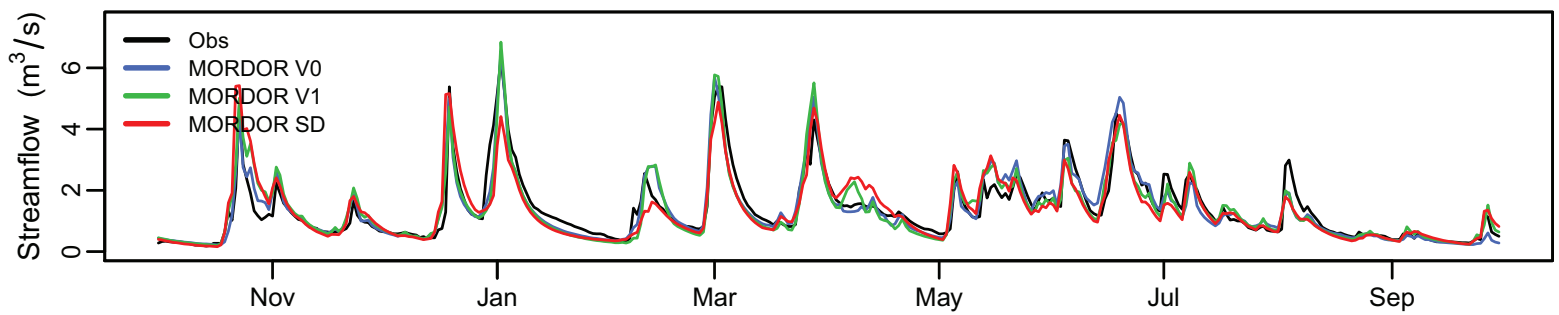

Year 1988

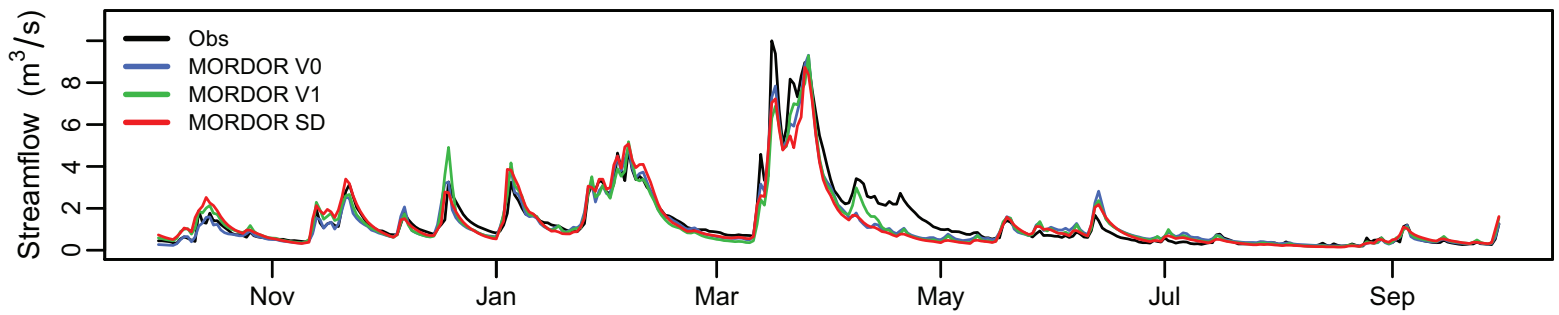

Year 1989

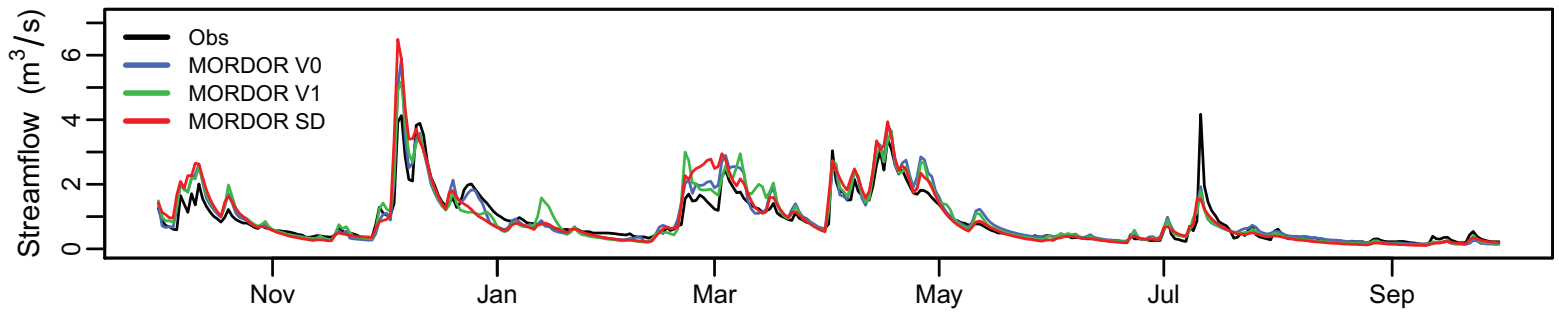

Year 1990

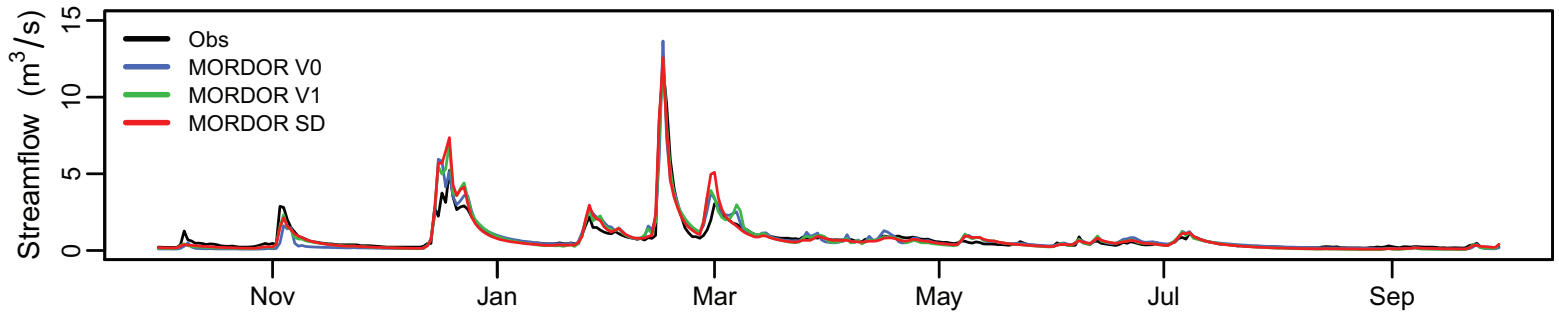

# Behine@LaPoutroie

Year 1991

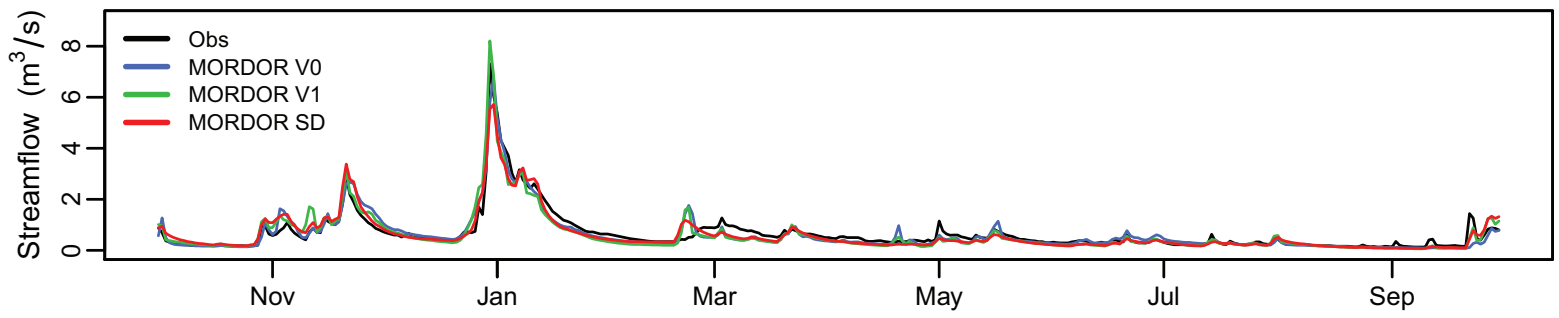

Year 1992

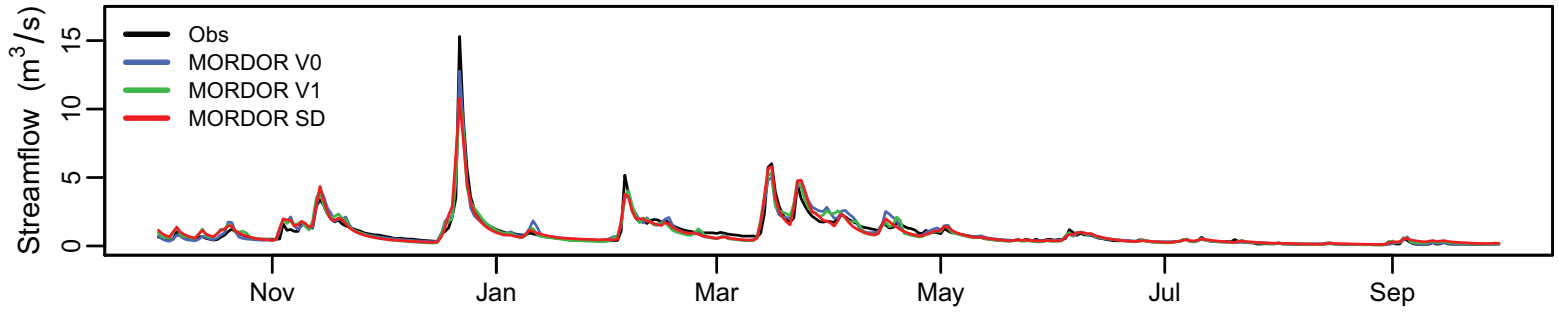

Year 1993

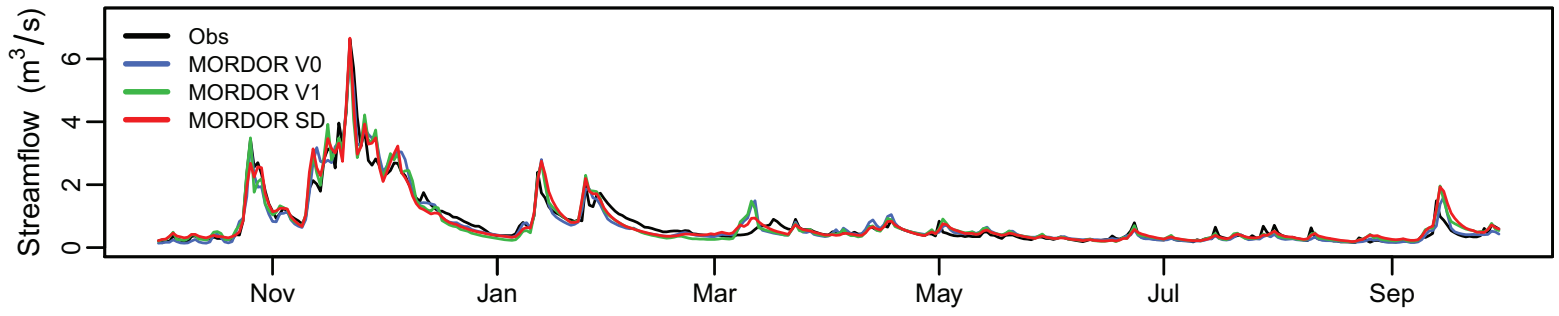

# Breze@Meyrueis

Year 1986

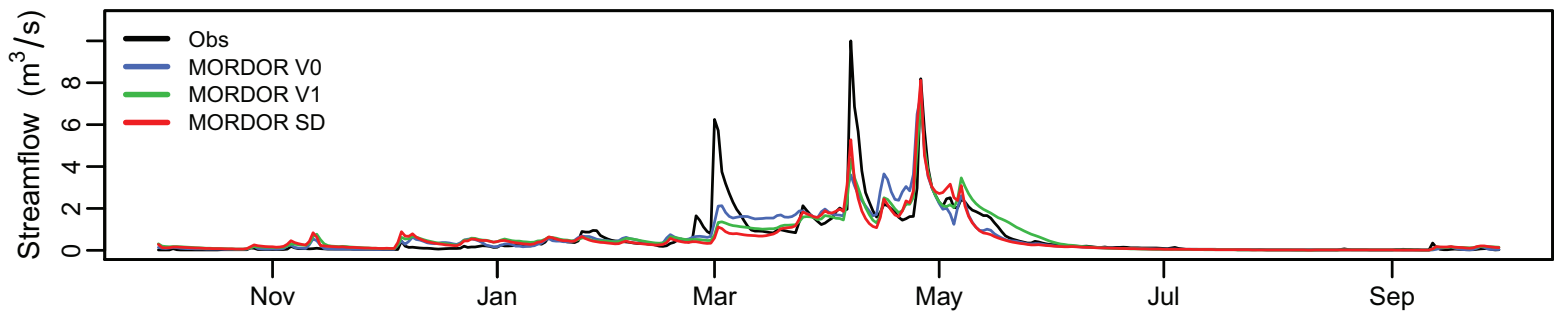

Year 1987

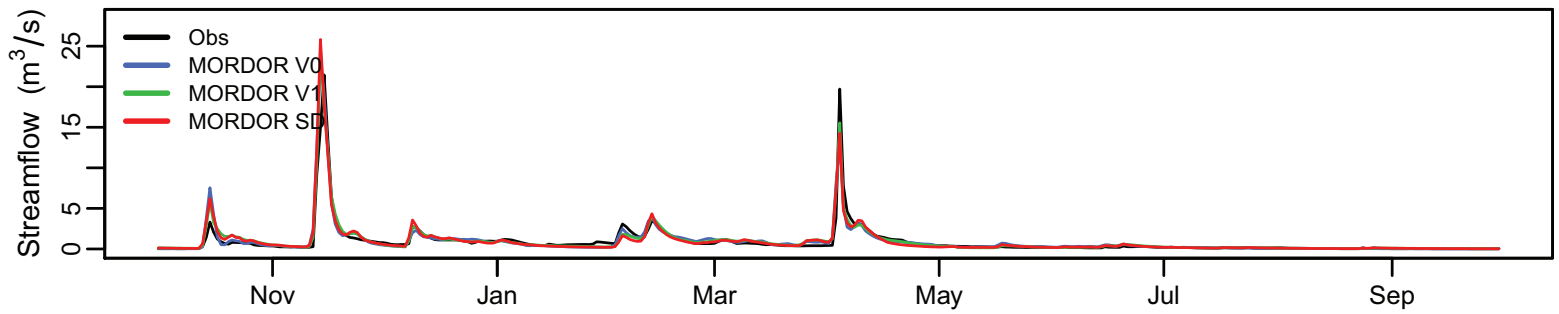

Year 1988

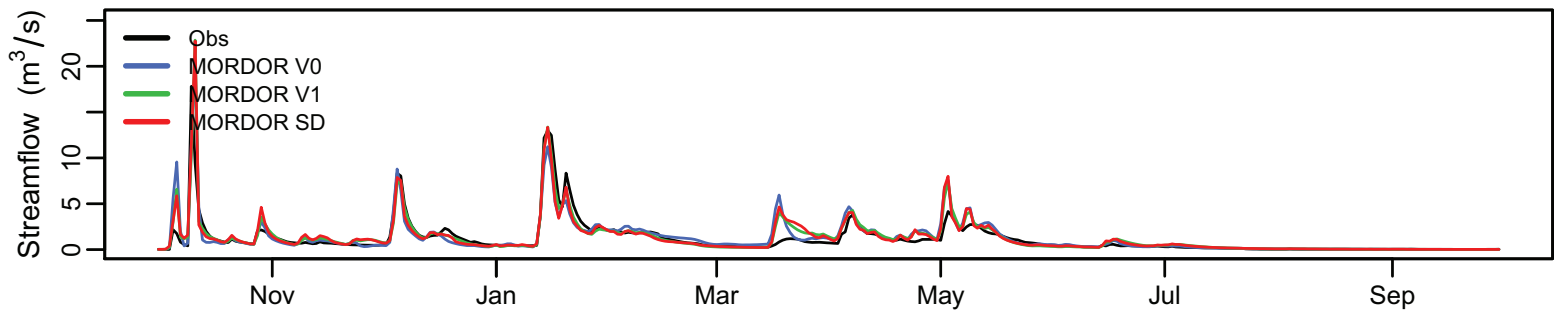

Year 1989

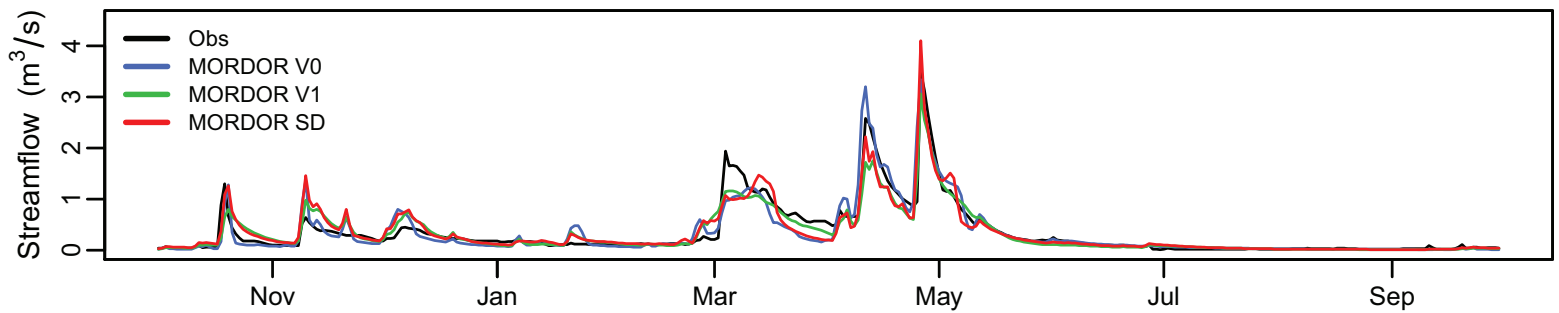

Year 1990

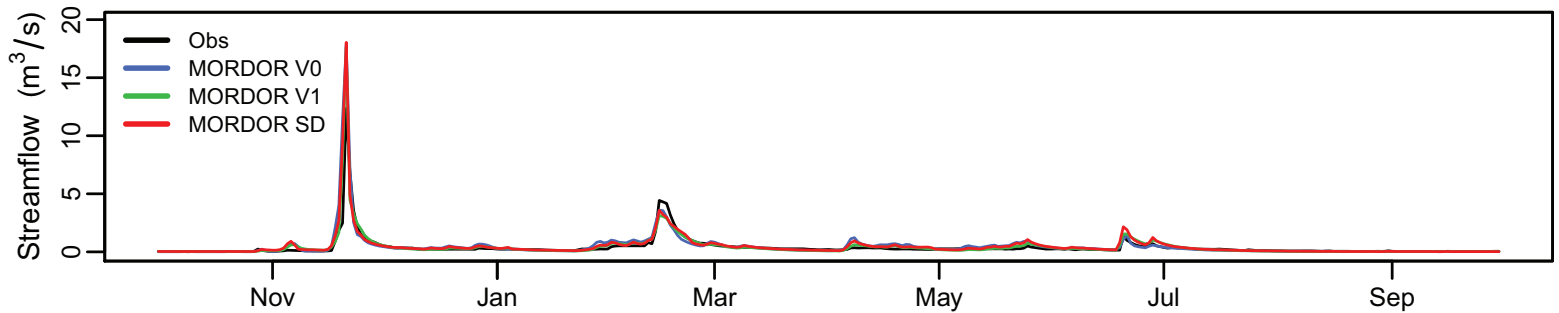

Year 1991

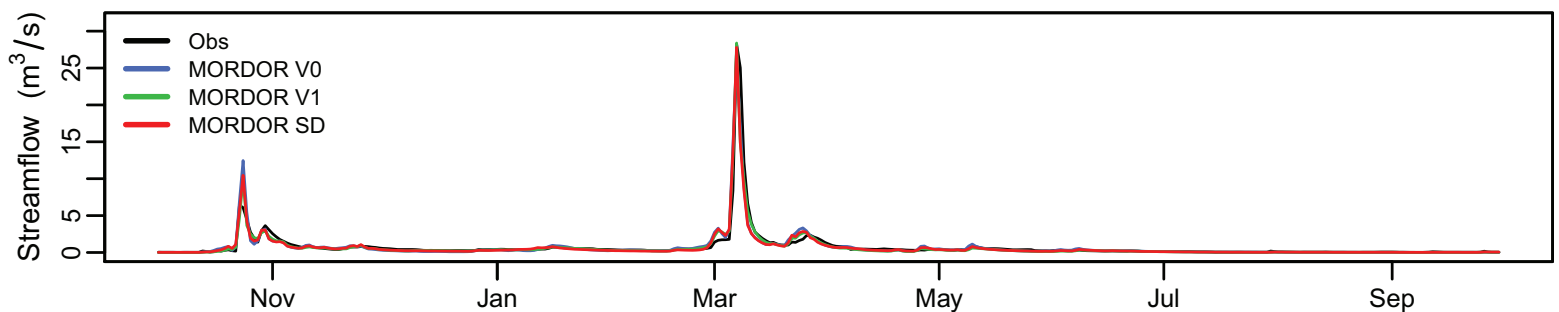



# Breze@Meyrueis

Year 1992

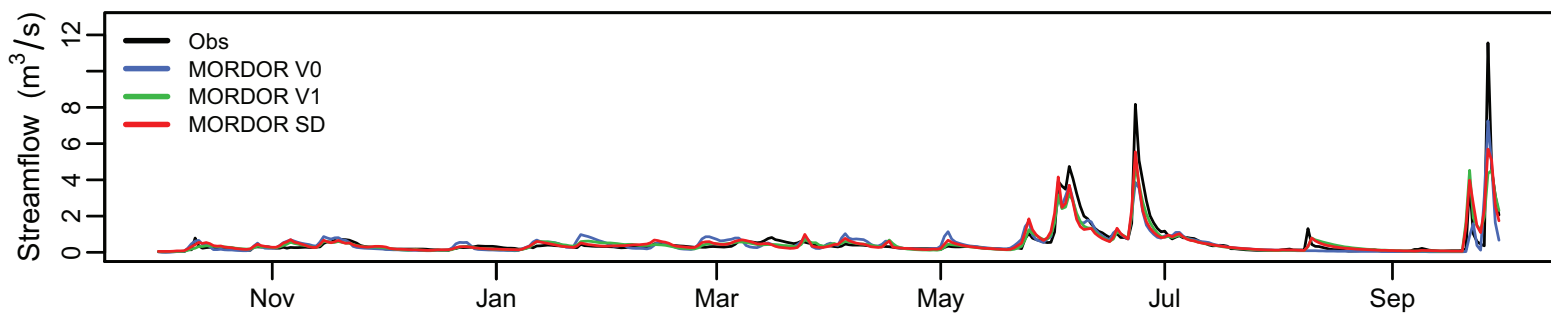

Year 1993

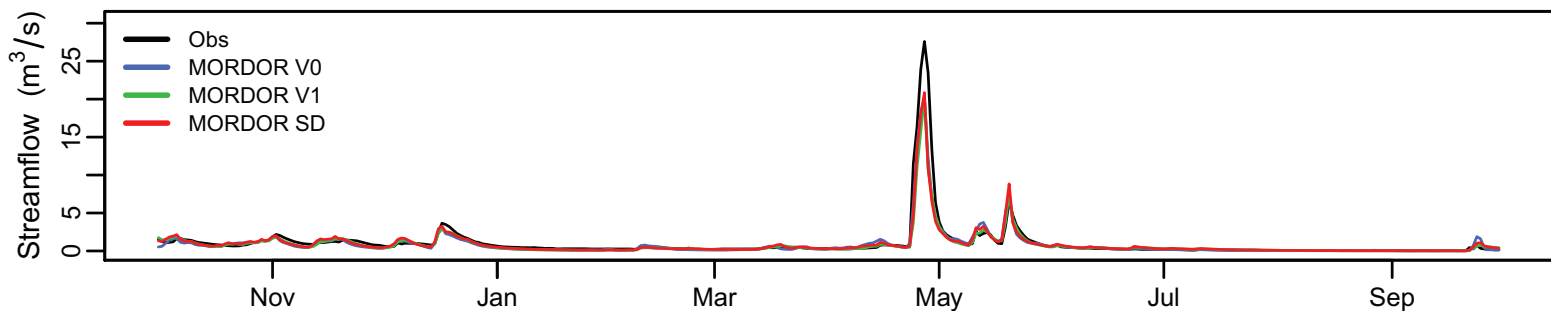

Year 1994

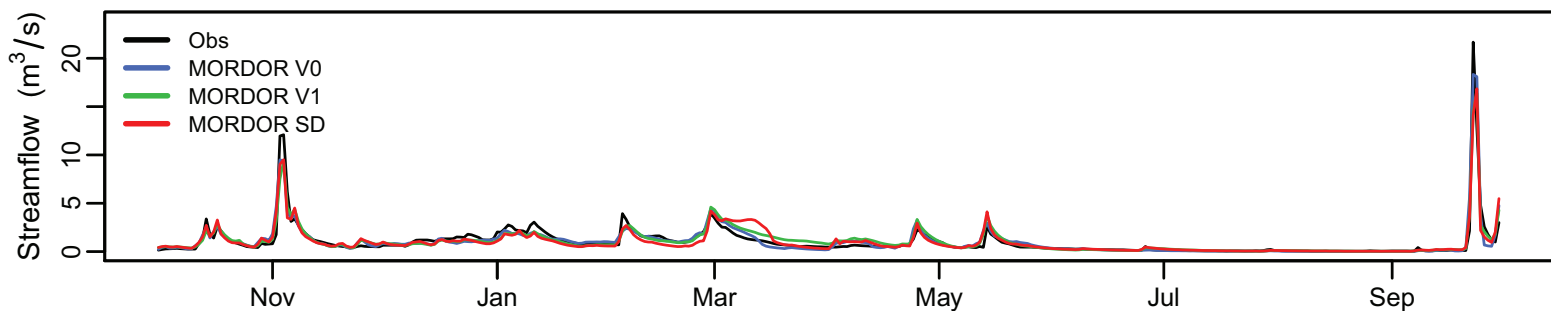

Year 1995

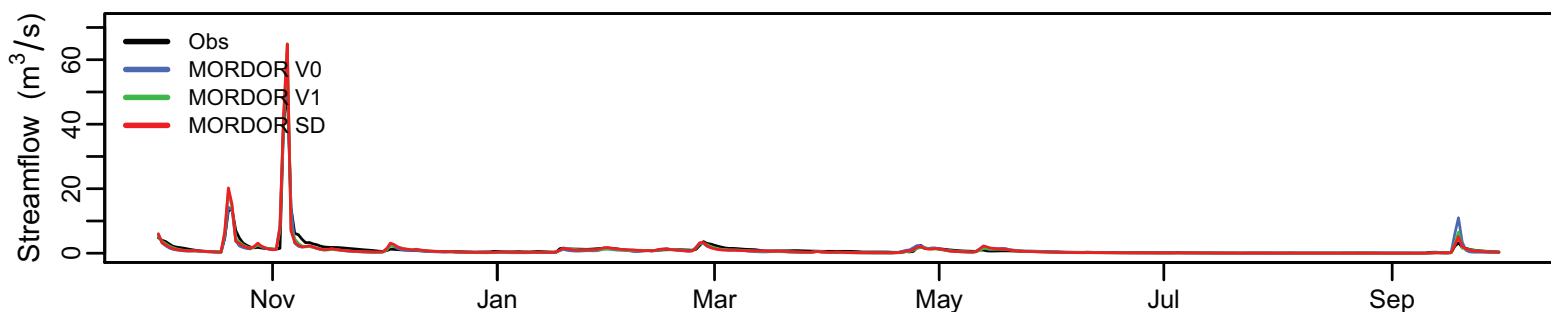

Year 1996

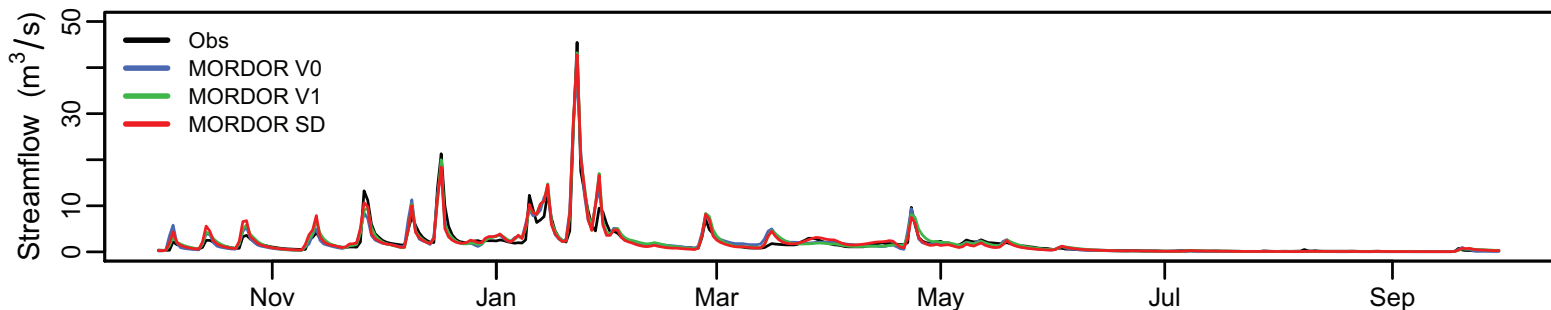

Year 1997

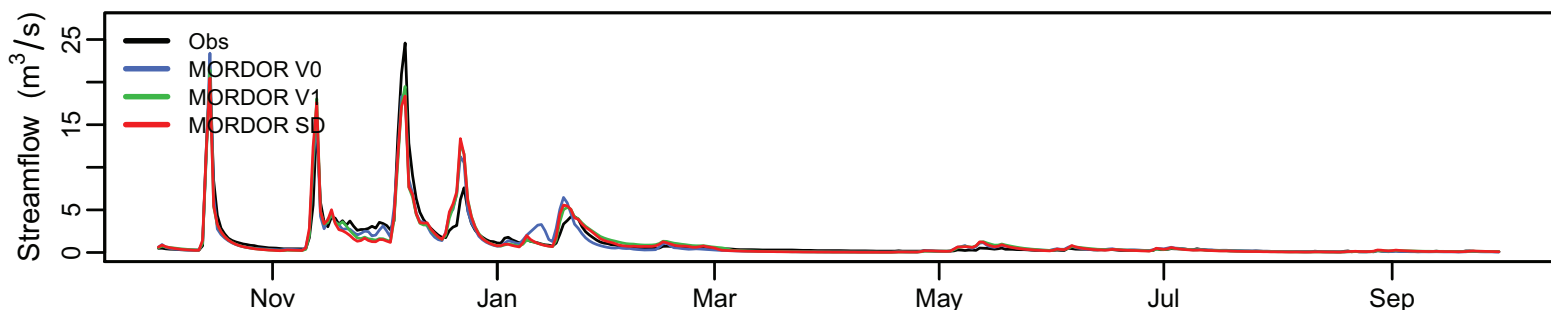

# Breze@Meyrueis

Year 1998

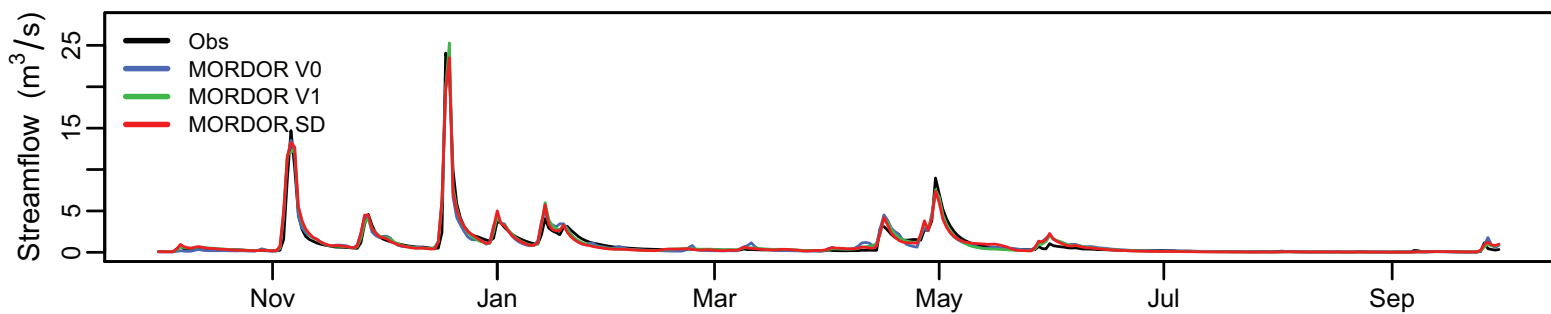

Year 1999

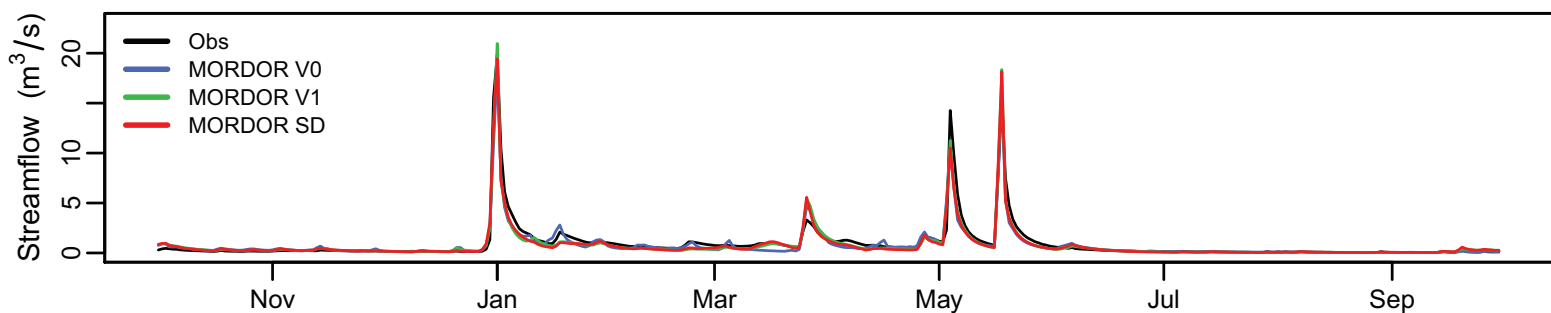

Year 2000

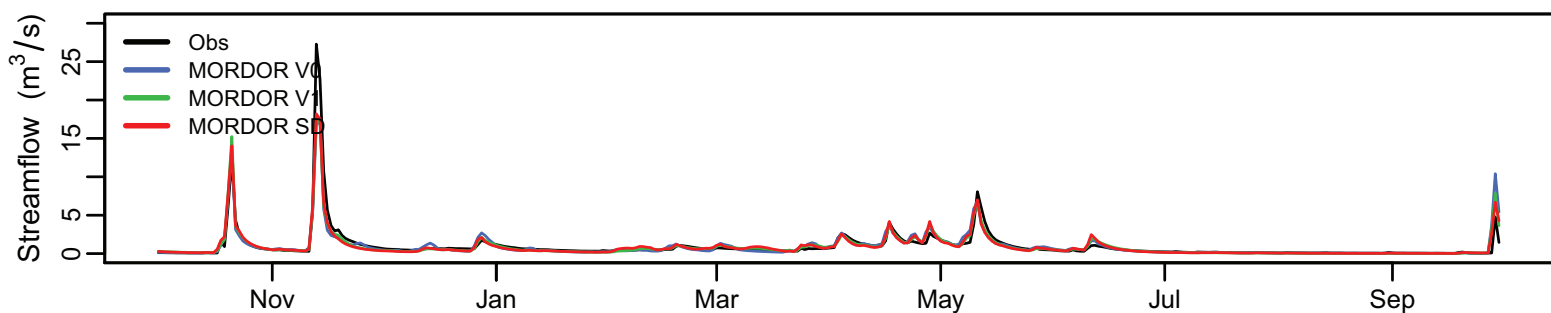

Year 2001

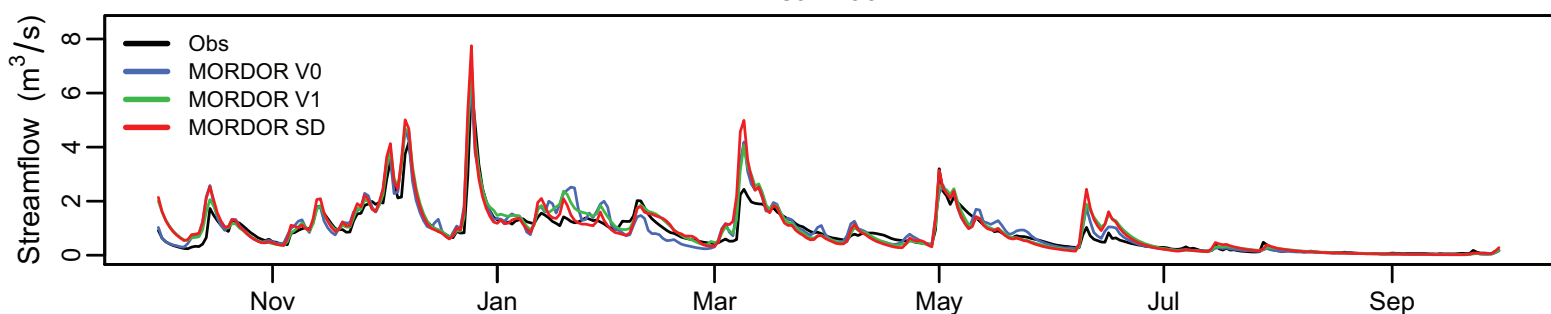

Year 2002

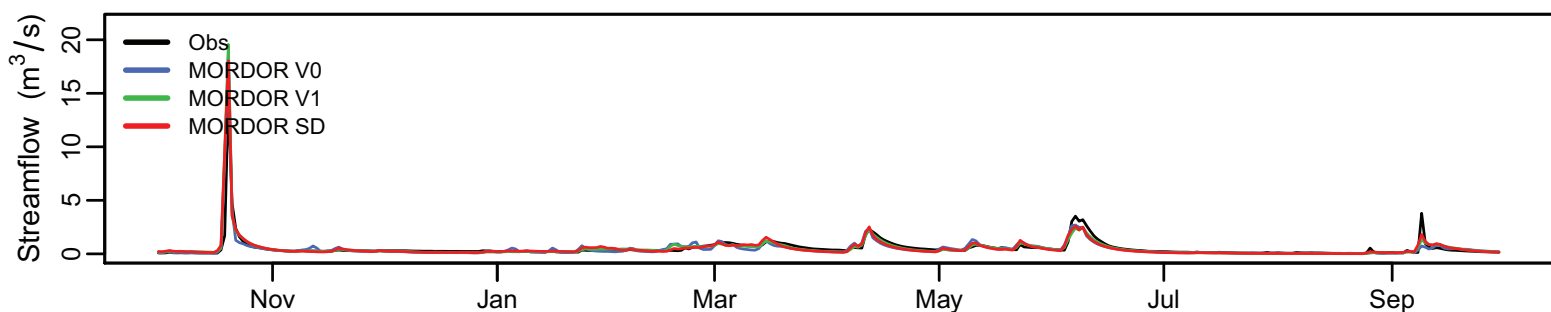

Year 2003

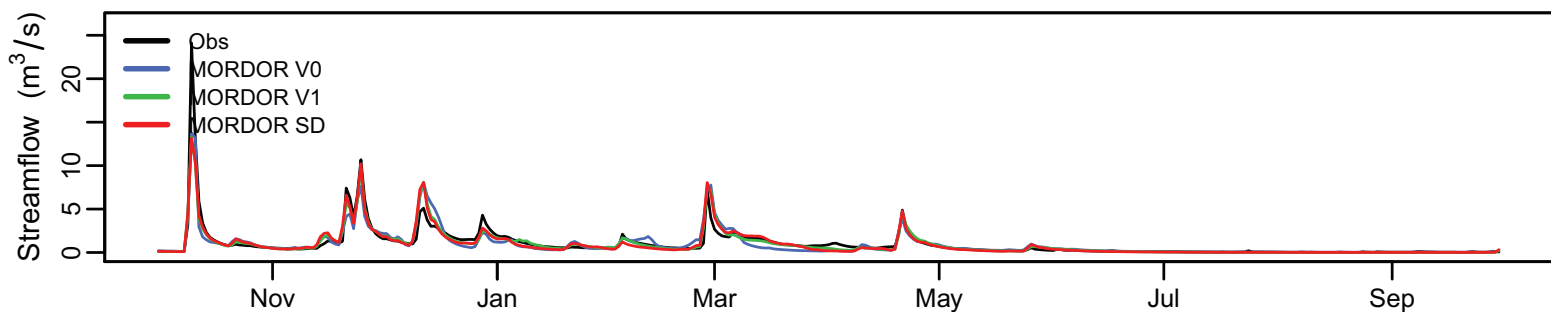

# Breze@Meyrueis

Year 2004

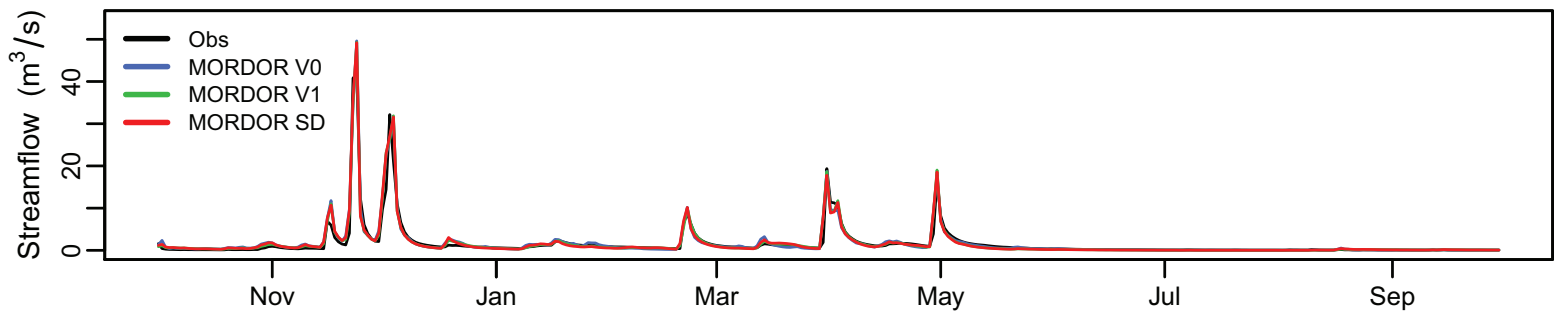

Year 2005

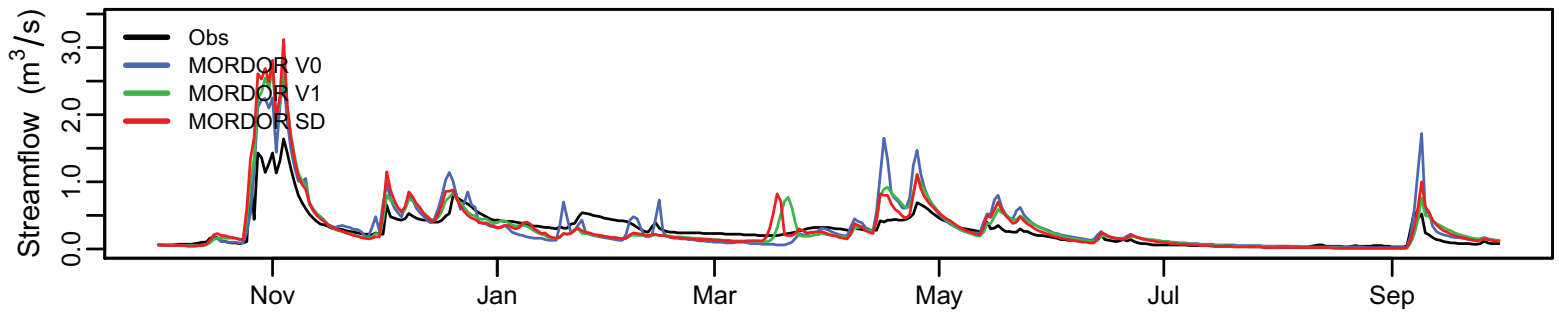

Year 2006

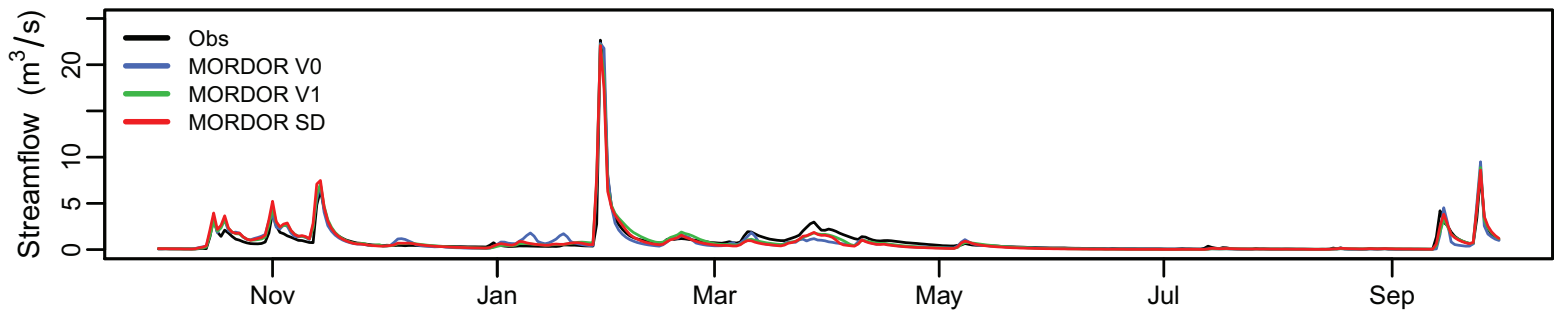

# Bromme@Brommat

Year 1990

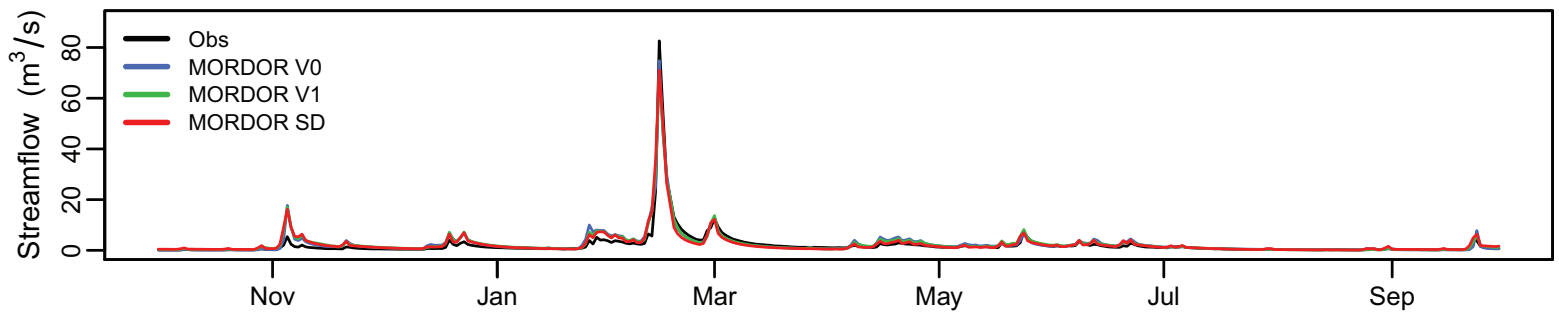

Year 1991

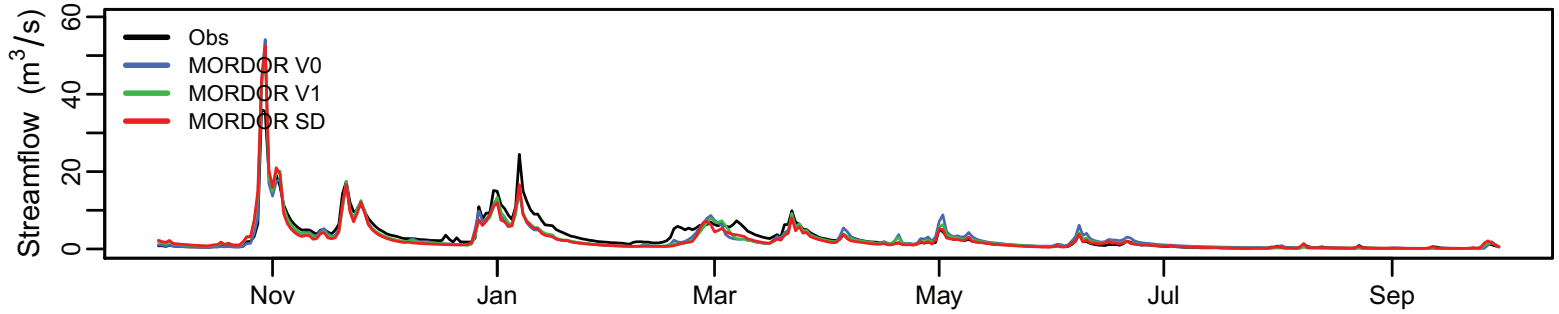

Year 1992

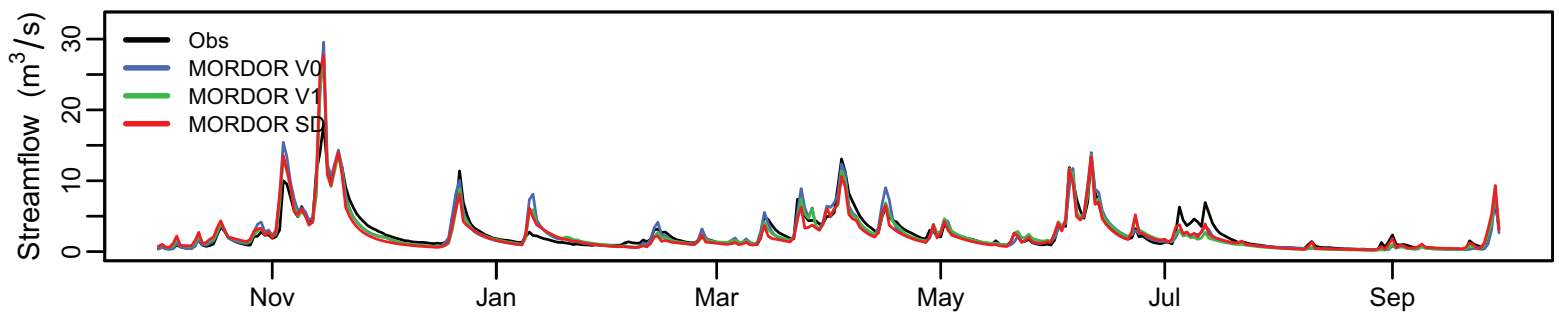

Year 1993

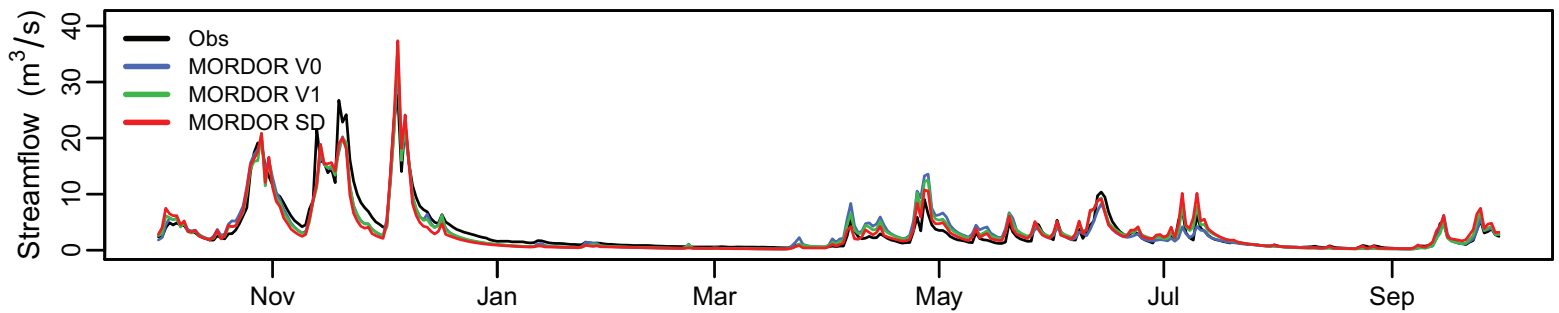

Year 1994

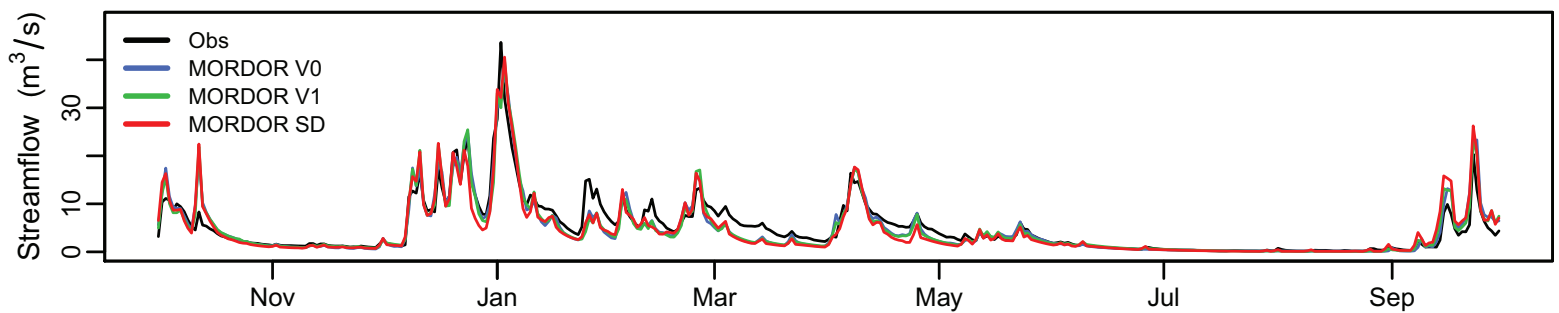

Year 1995

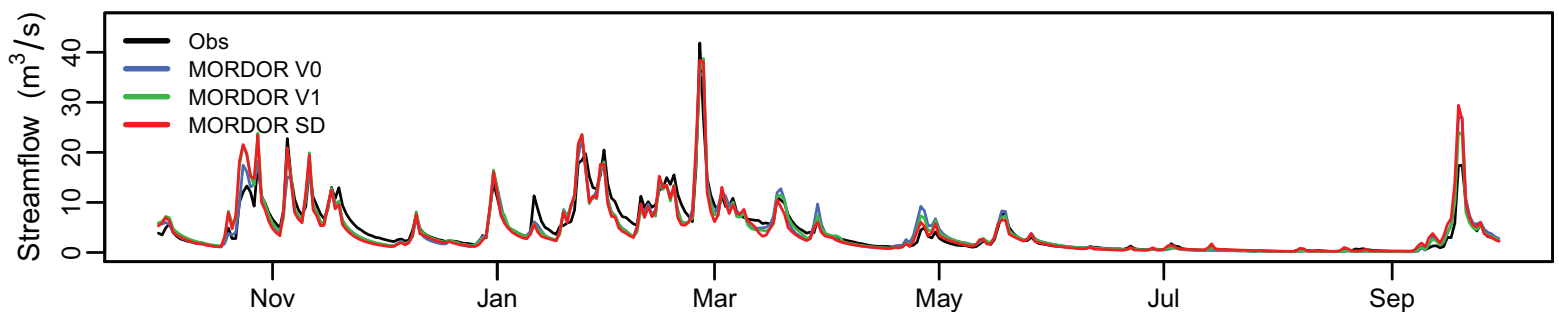

# Bromme@Brommat

Year 1996

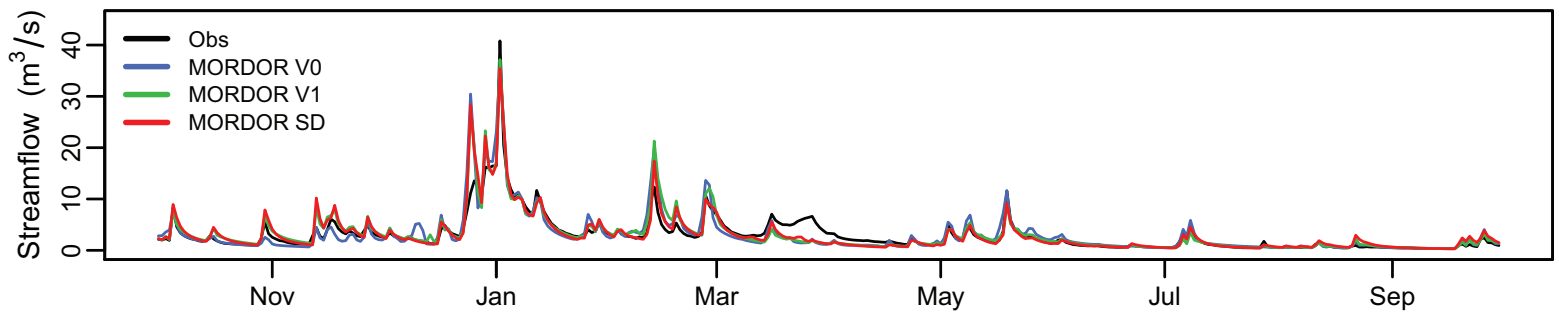

Year 1997

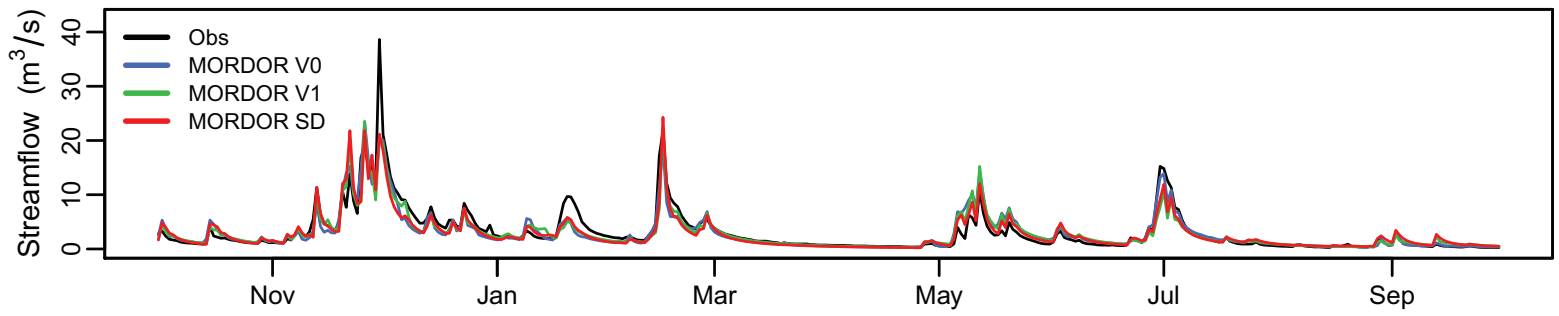

Year 1998

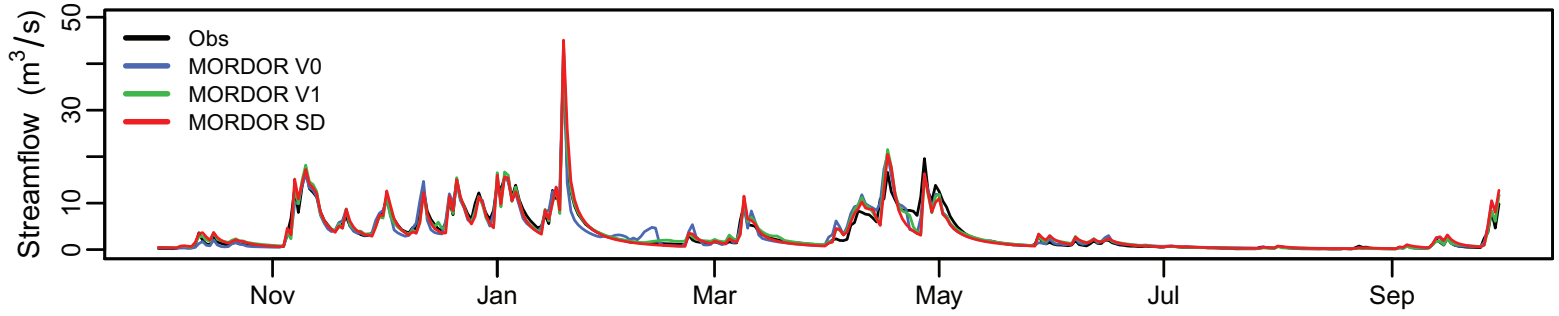

Year 1999

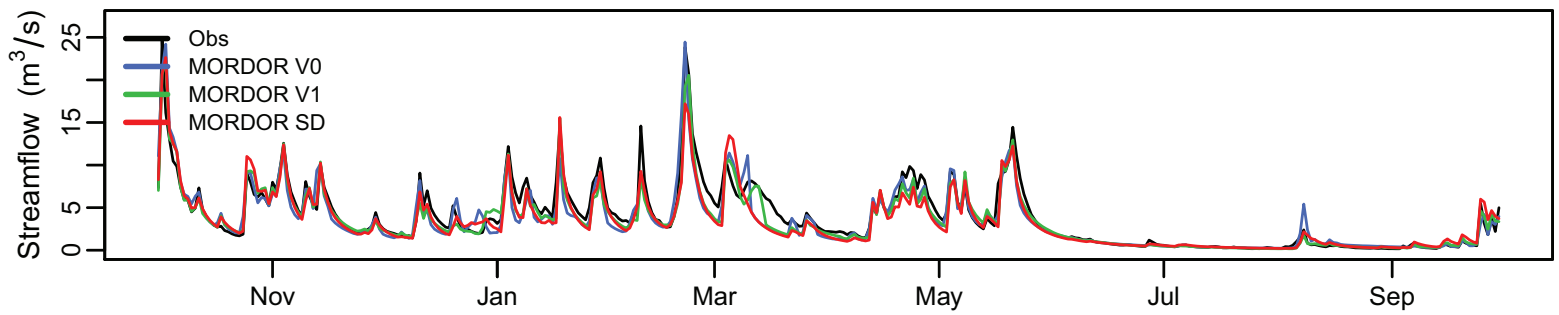

Year 2000

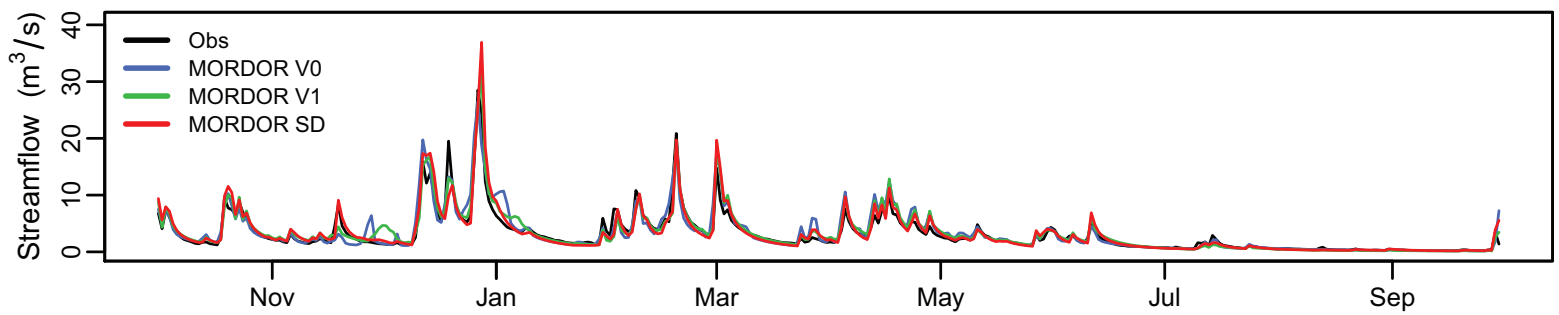

# Ceze@Bagnols

Year 1995

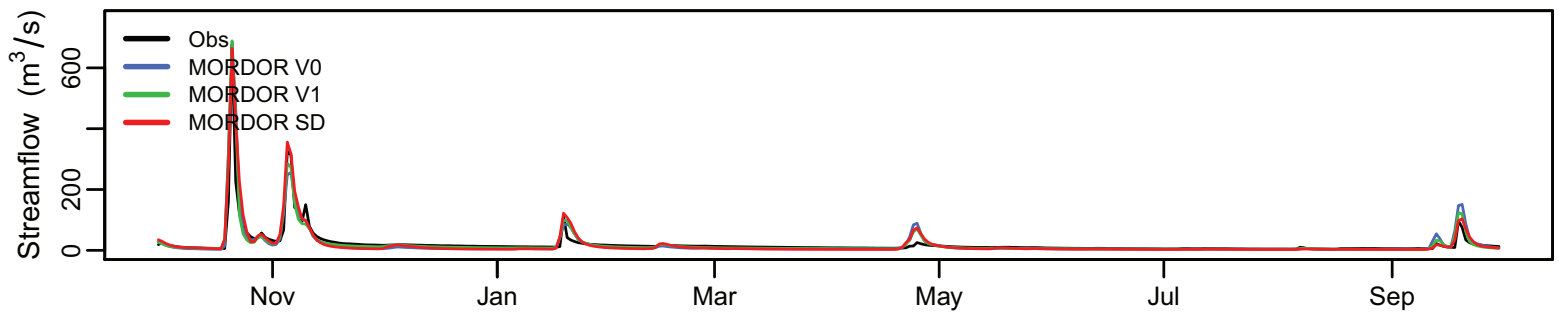

Year 1996

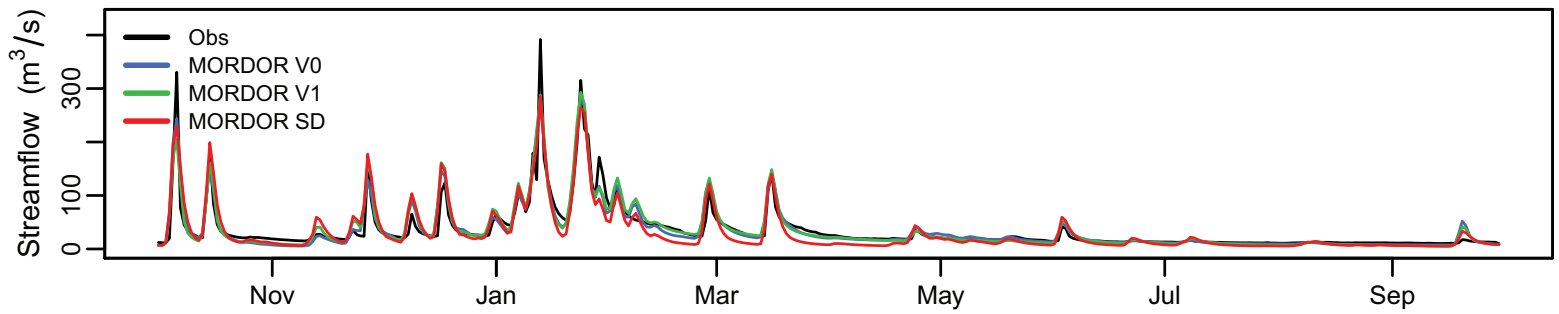

Year 1997

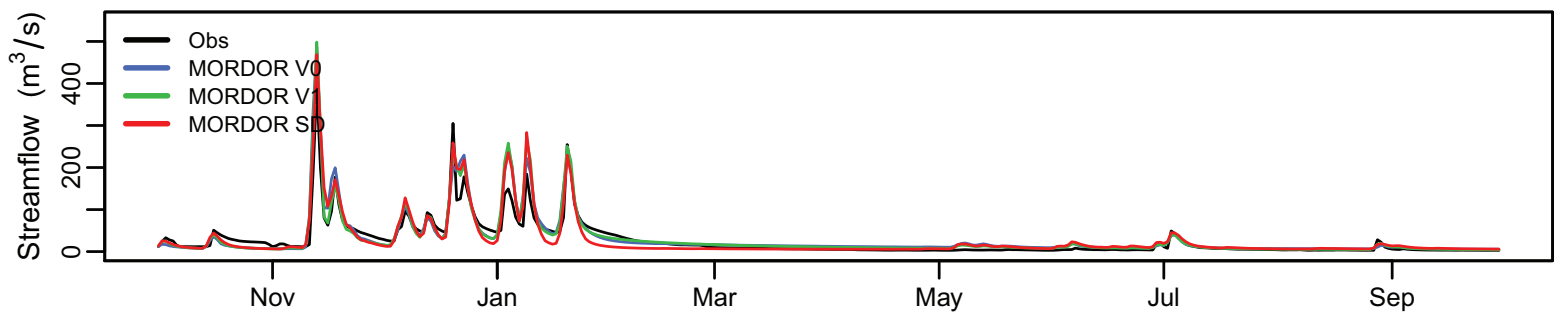

Year 1998

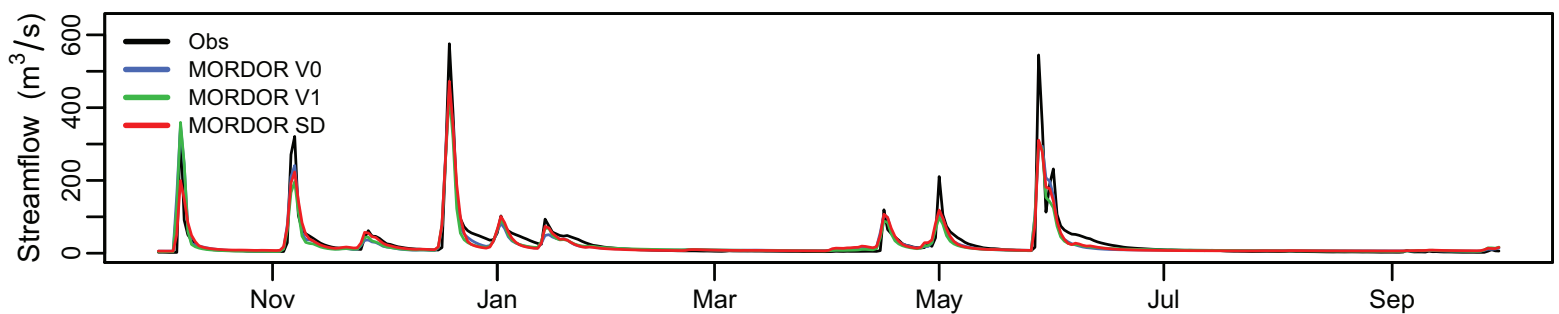

Year 1999

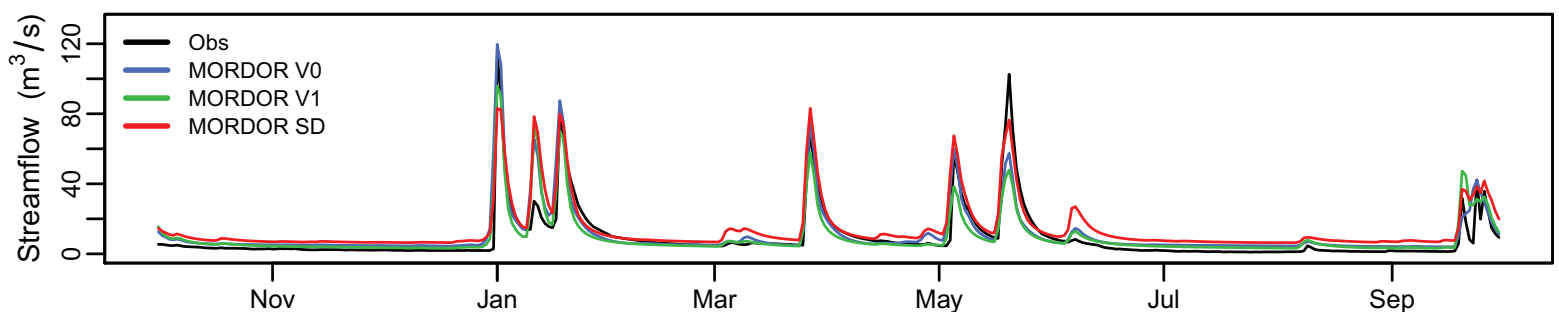

Year 2000

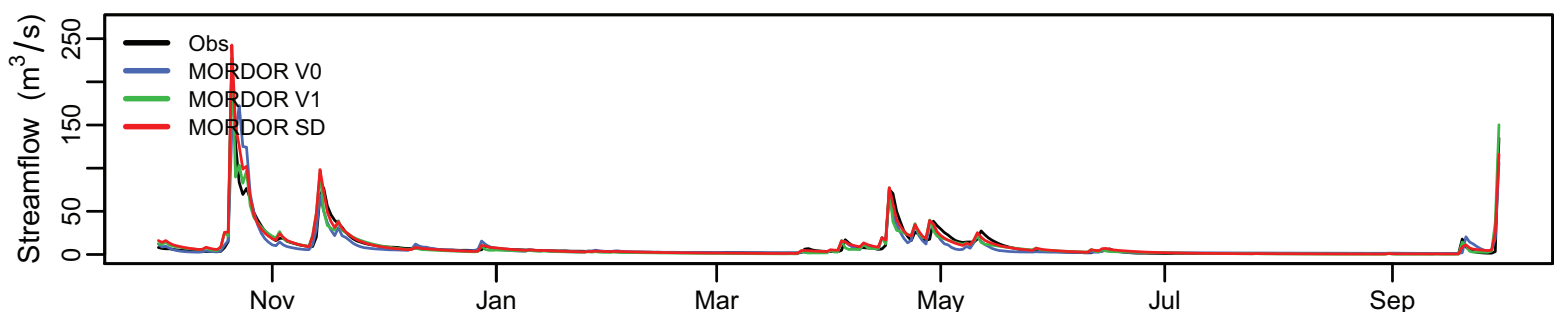

# Ceze@Bagnols

Year 2001

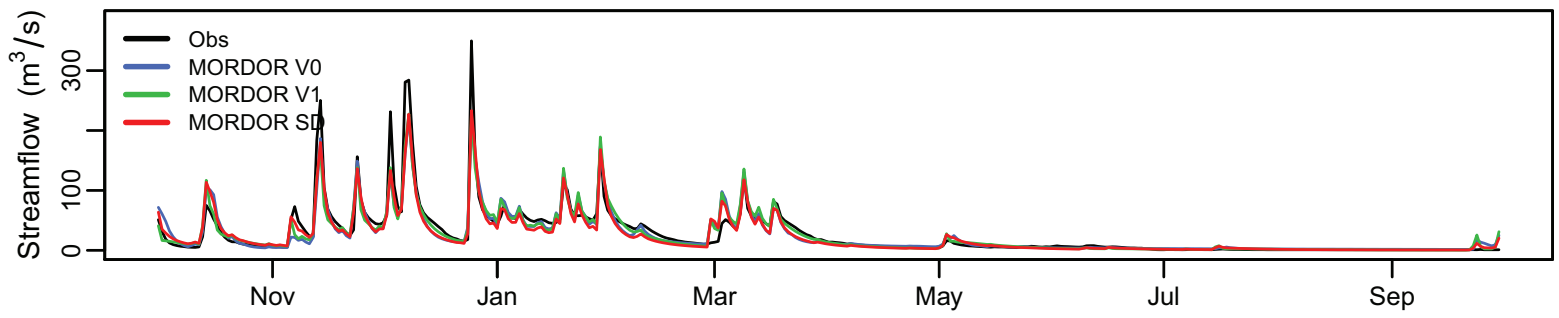

Year 2002

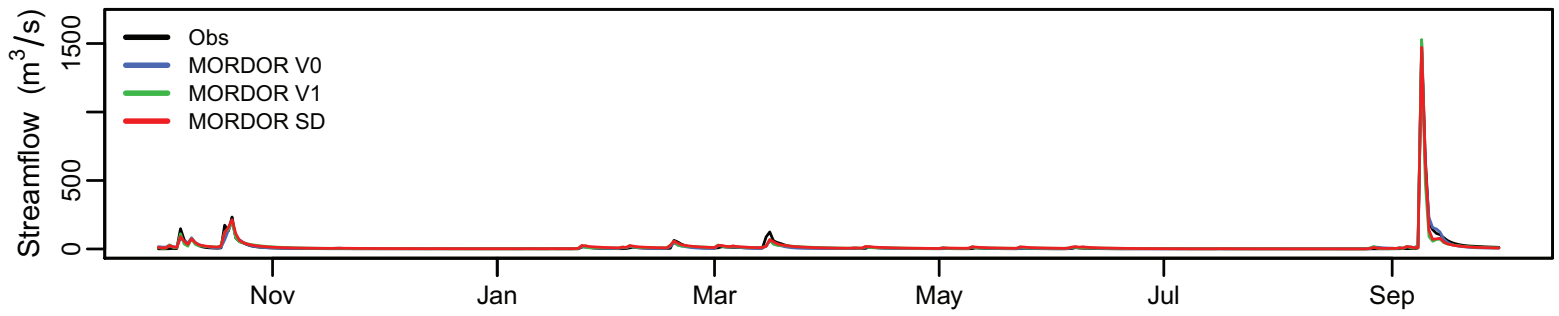

Year 2003

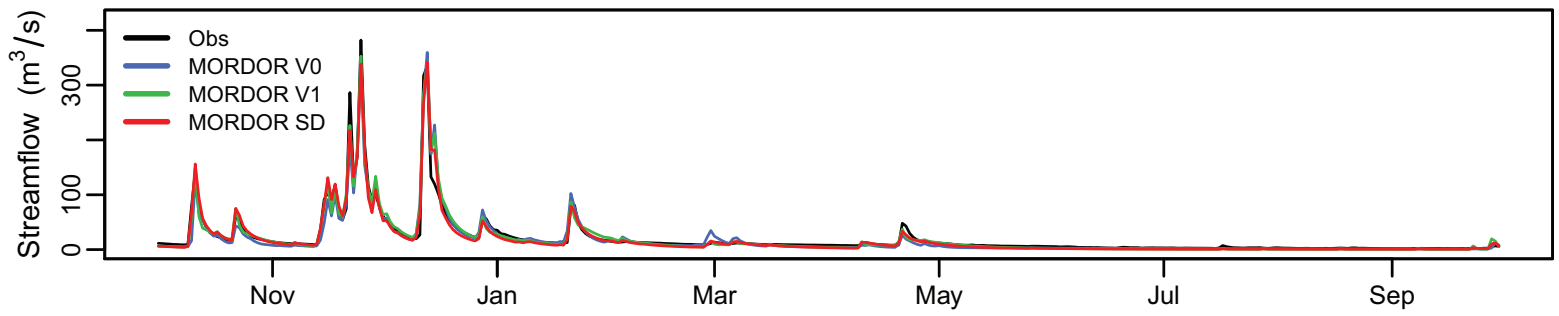

Year 2004

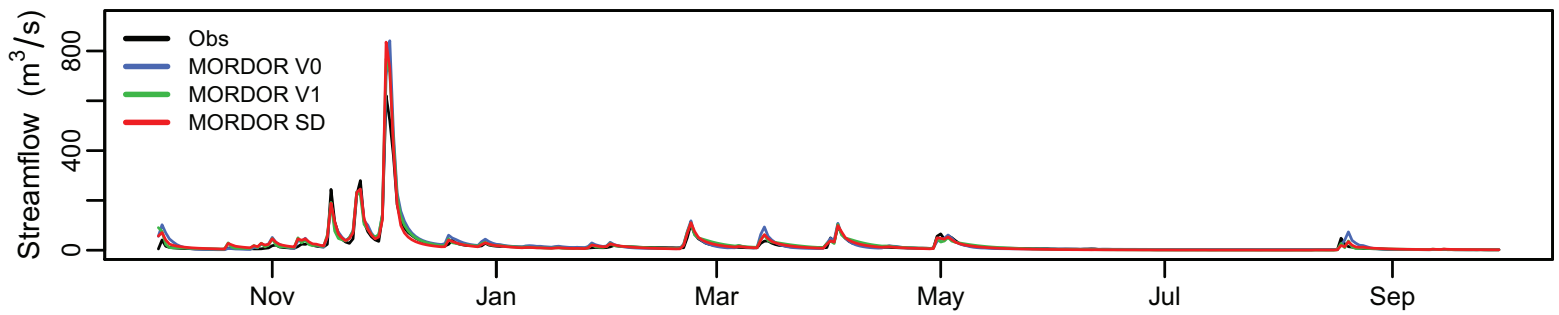

# Chassezac@SteMarguerite

Year 1969

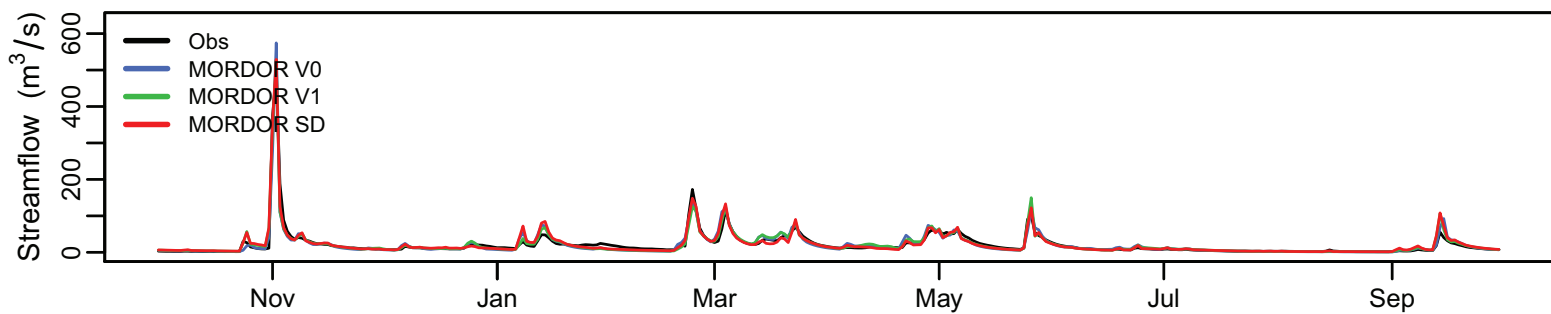

Year 1970

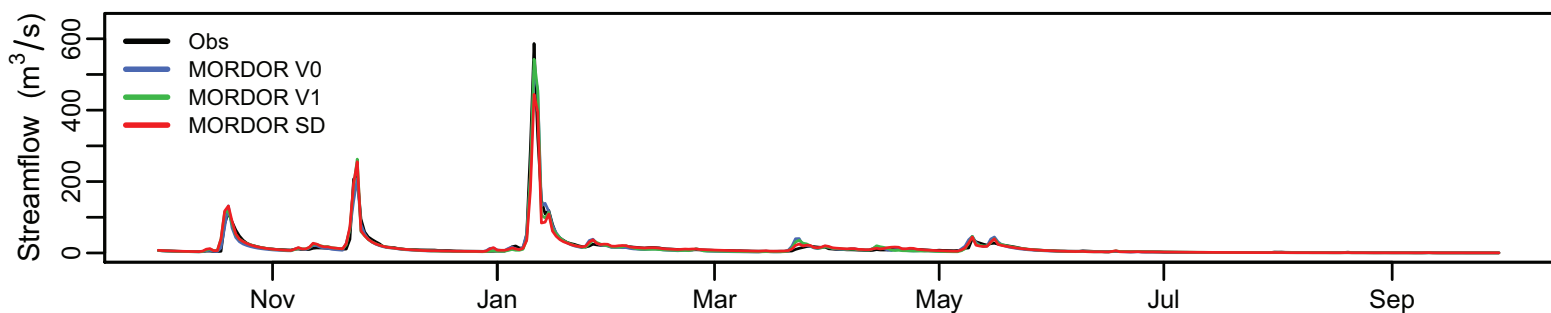

Year 1971

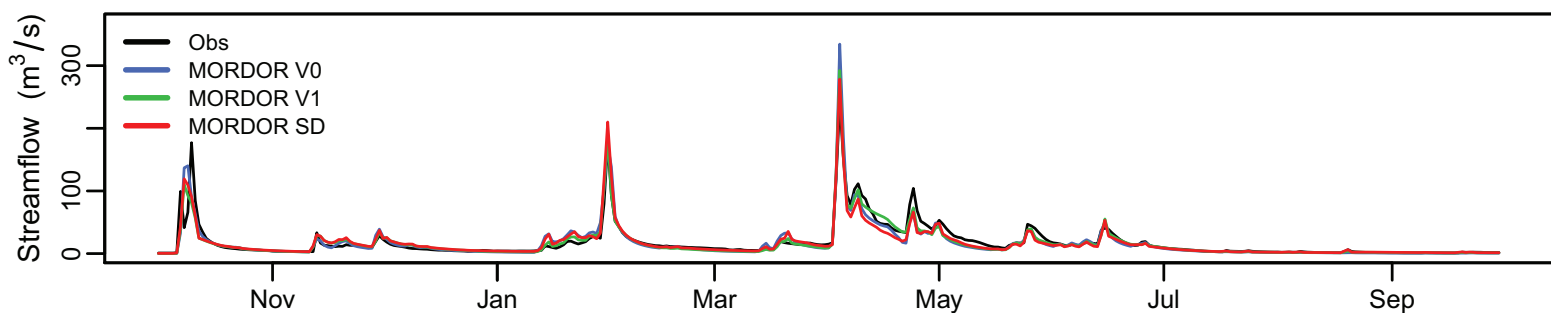

Year 1972

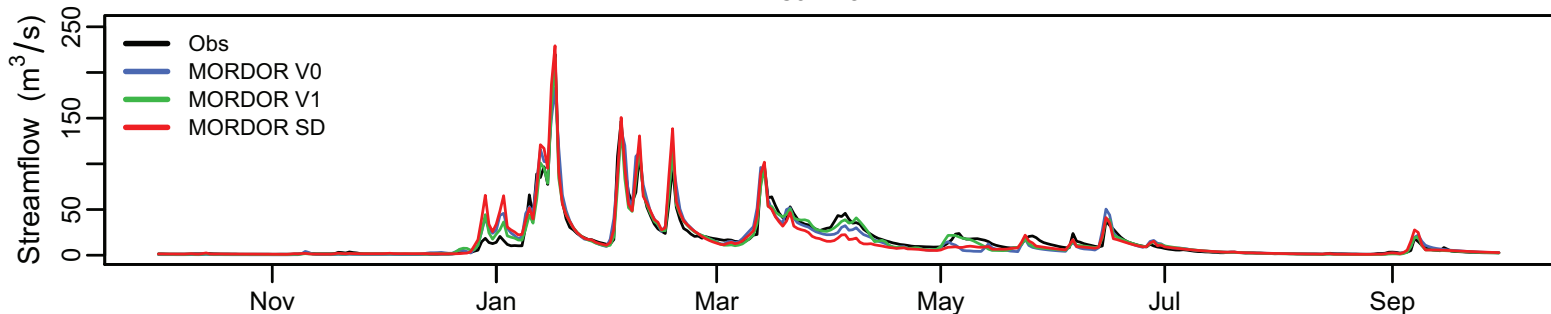

Year 1973

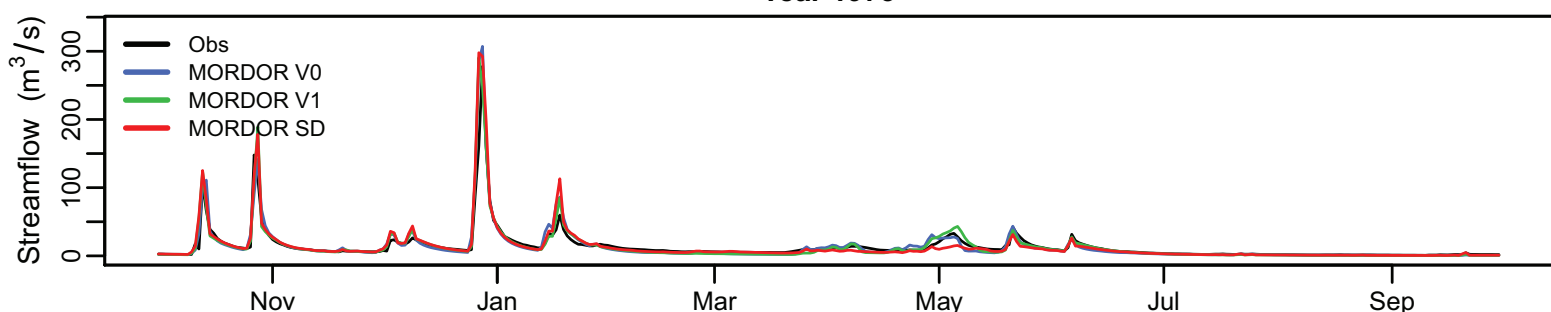

Year 1974

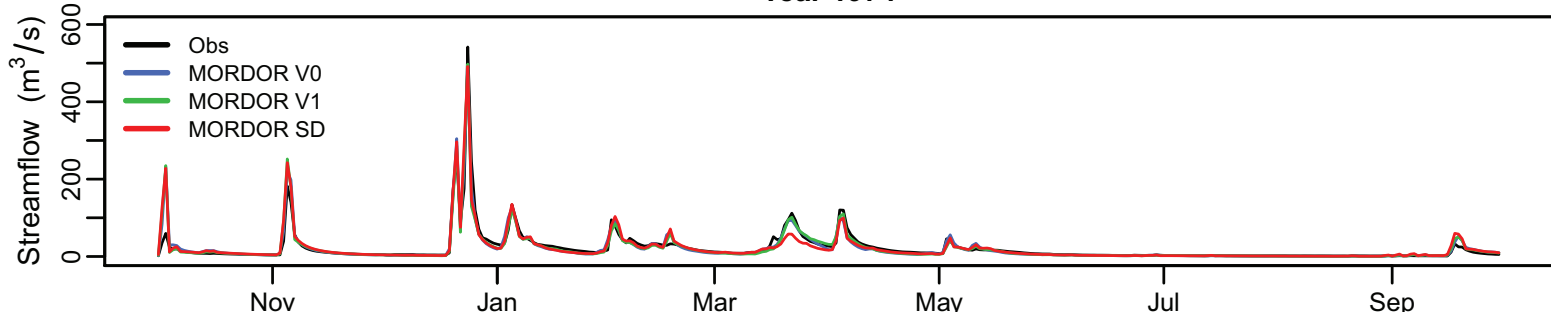



# Chassezac@SteMarguerite

Year 1975

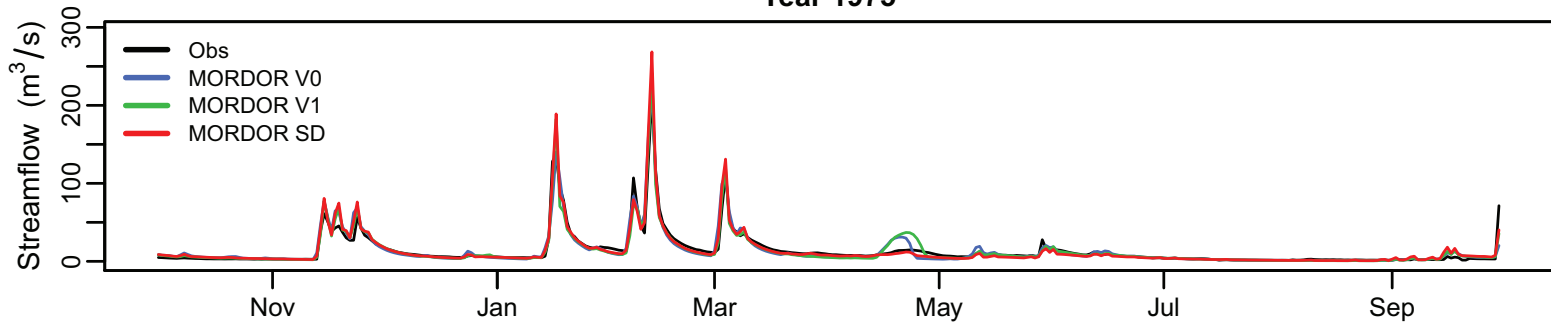

Year 1976

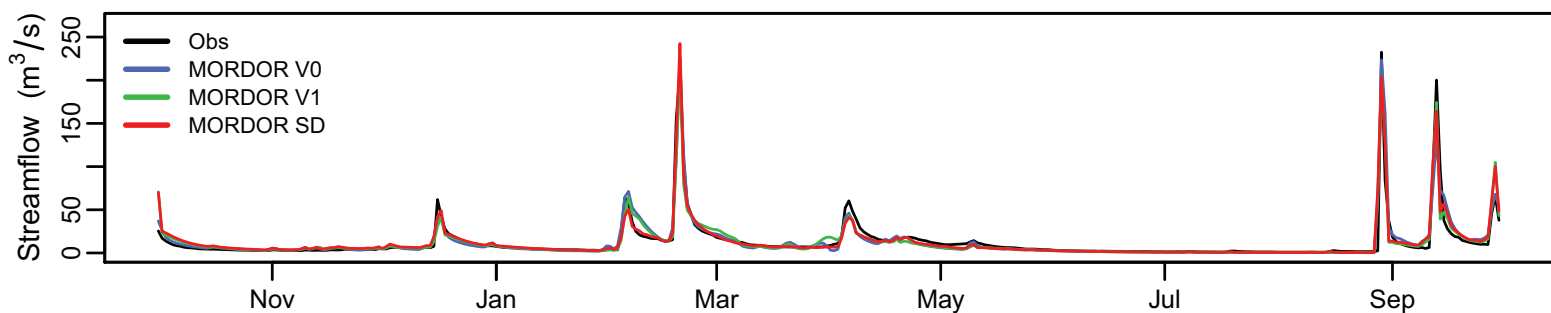

Year 1977

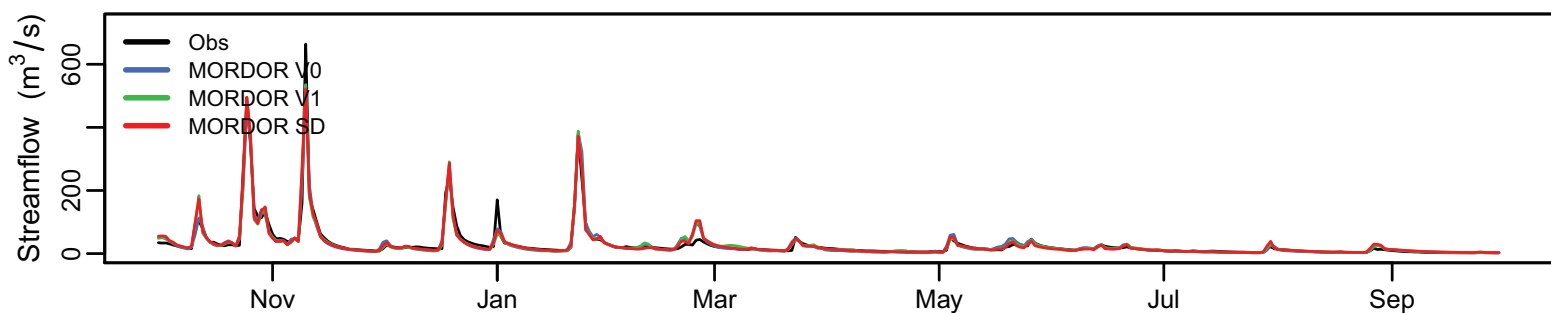

Year 1978

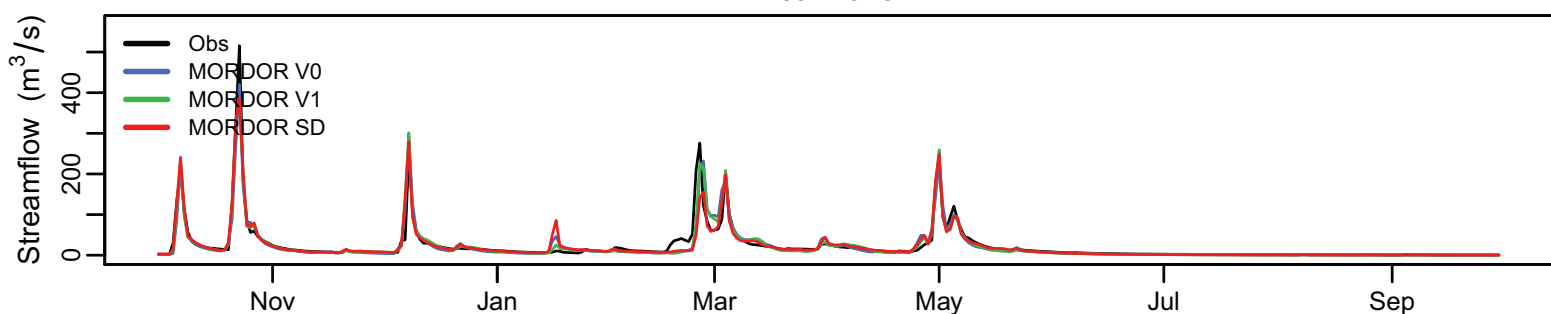

Year 1979

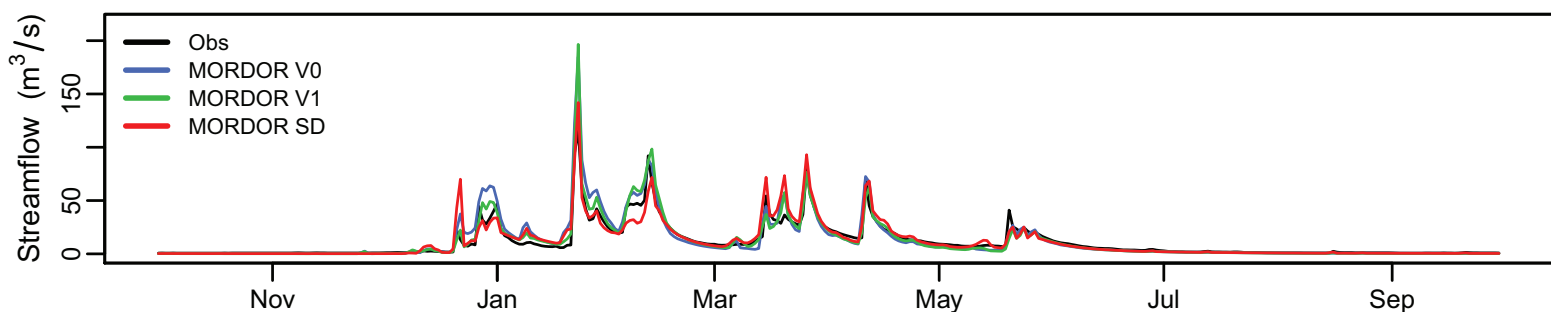

Year 1980

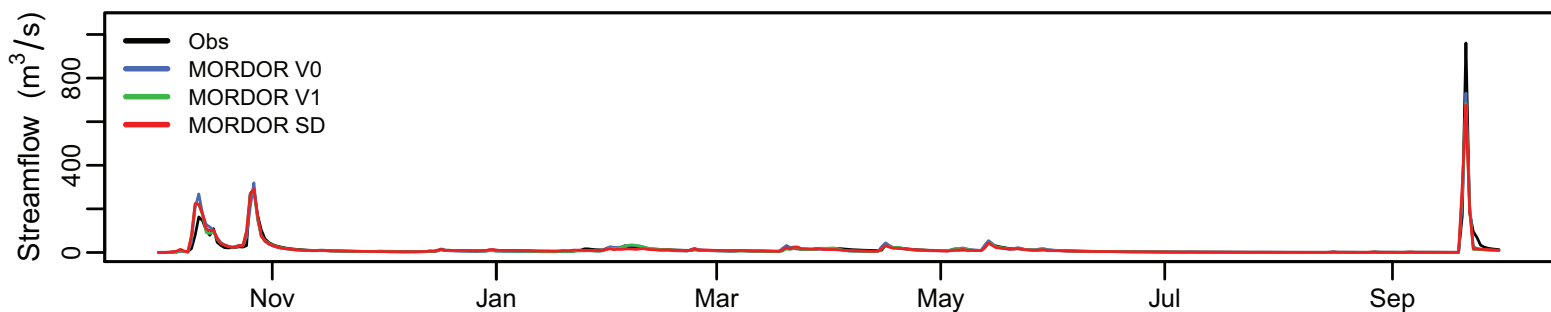

# Chassezac@SteMarguerite

Year 1981

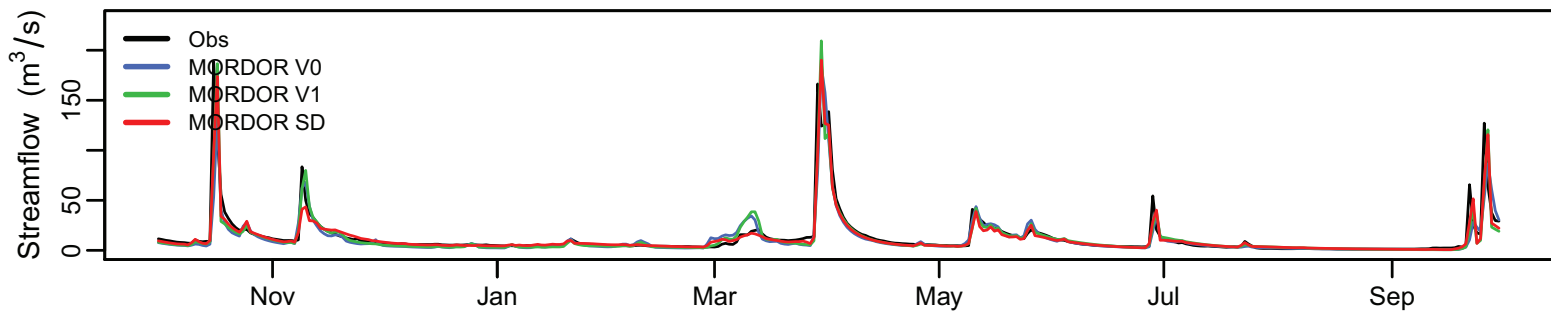

Year 1982

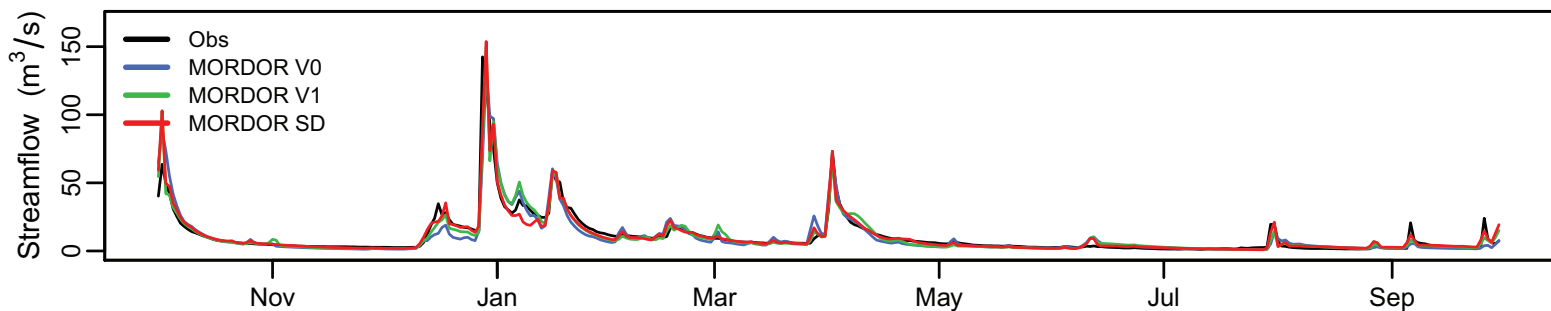

Year 1983

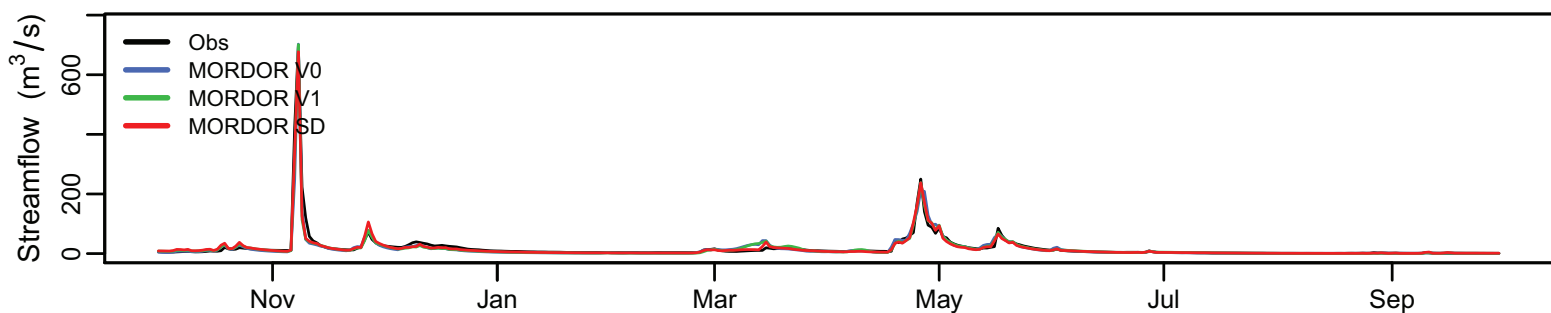

Year 1984

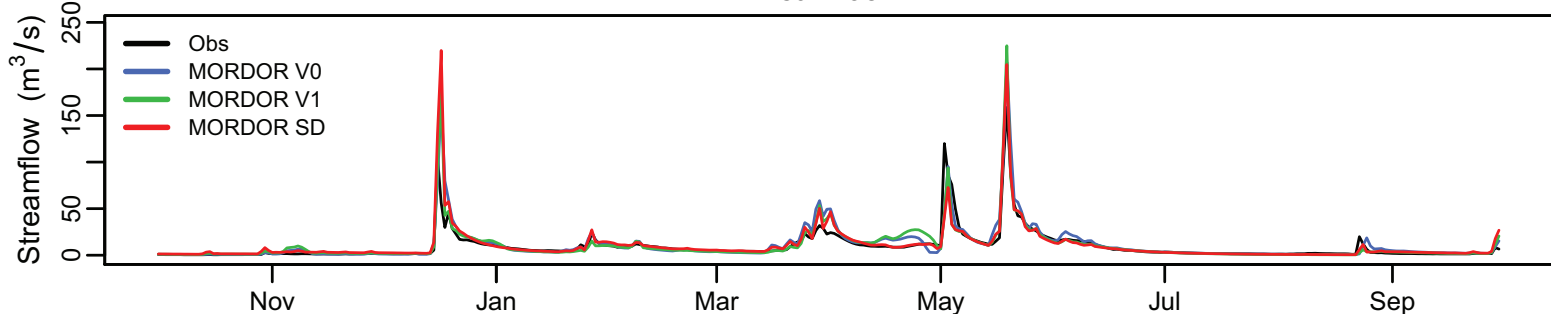

Year 1985

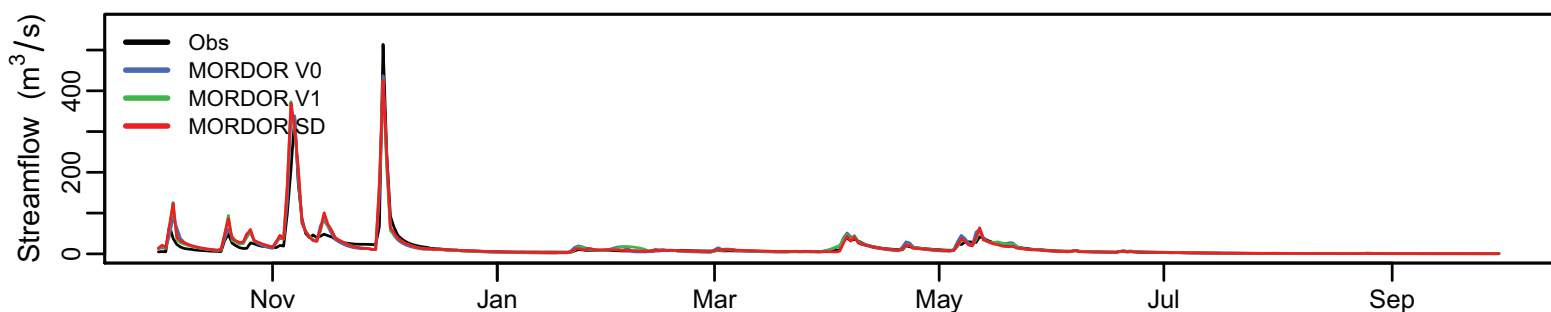

Year 1986

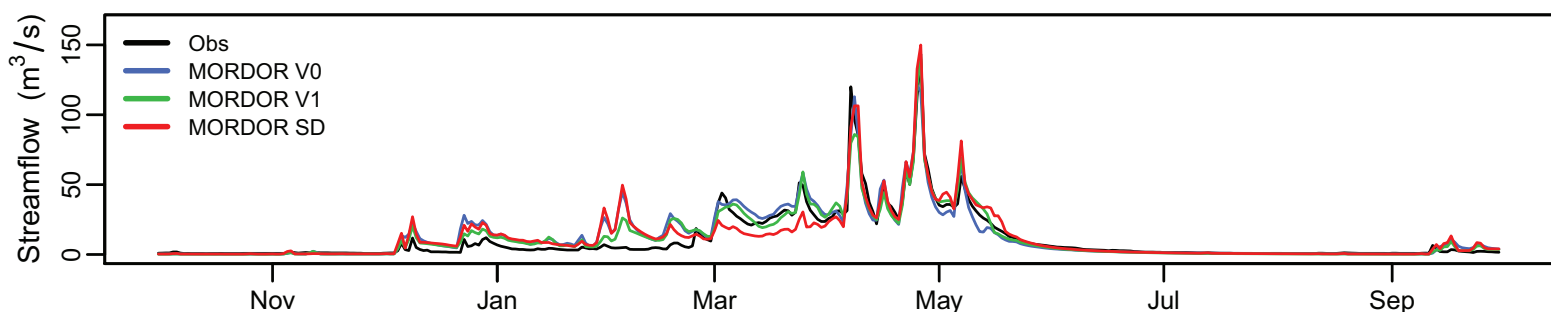

# Chassezac@SteMarguerite

Year 1987

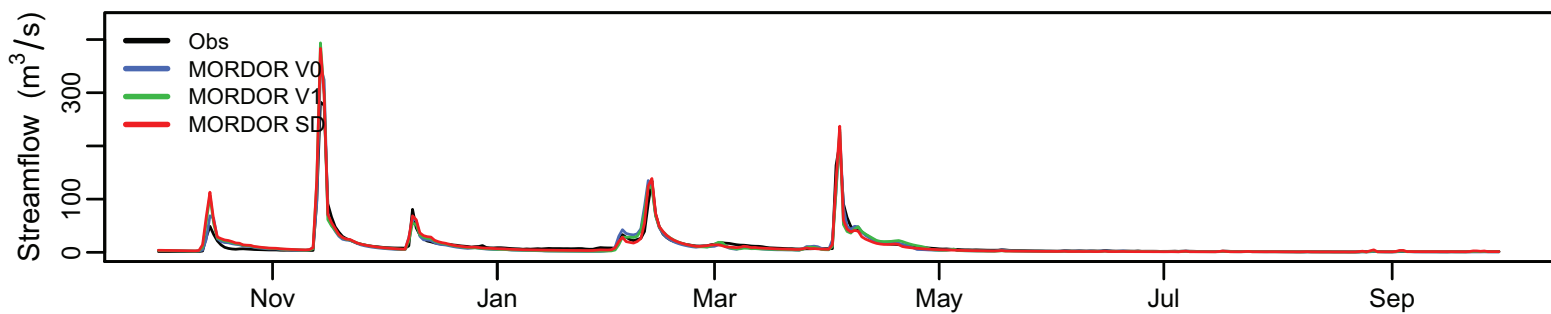

Year 1988

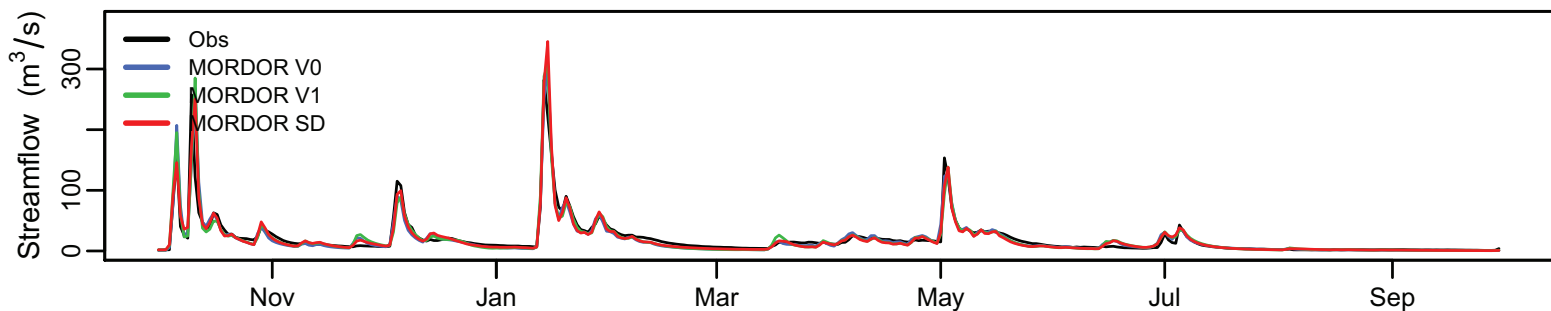

Year 1989

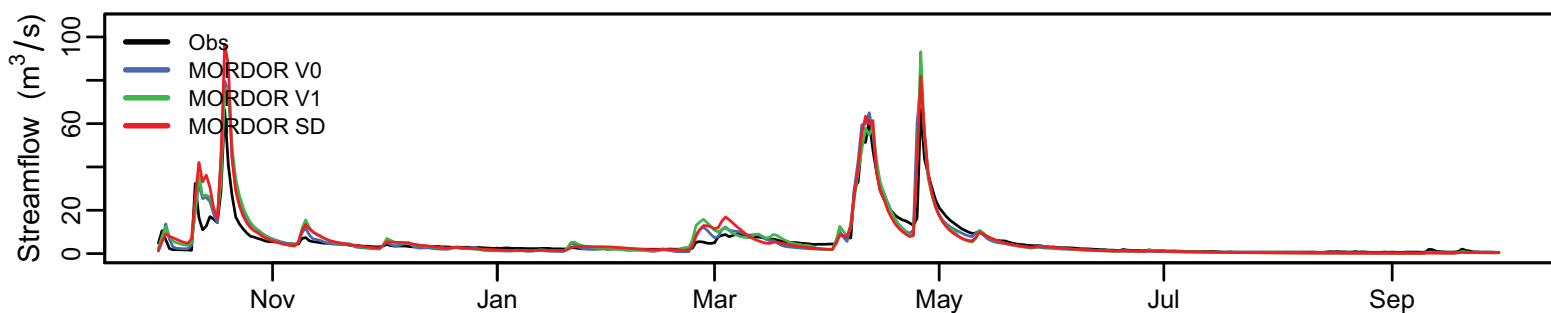

Year 1990

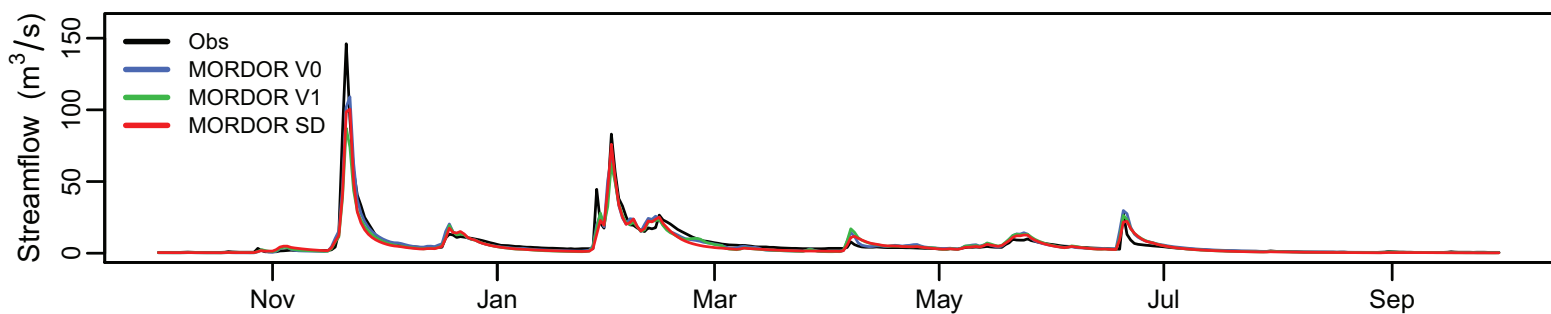

Year 1991

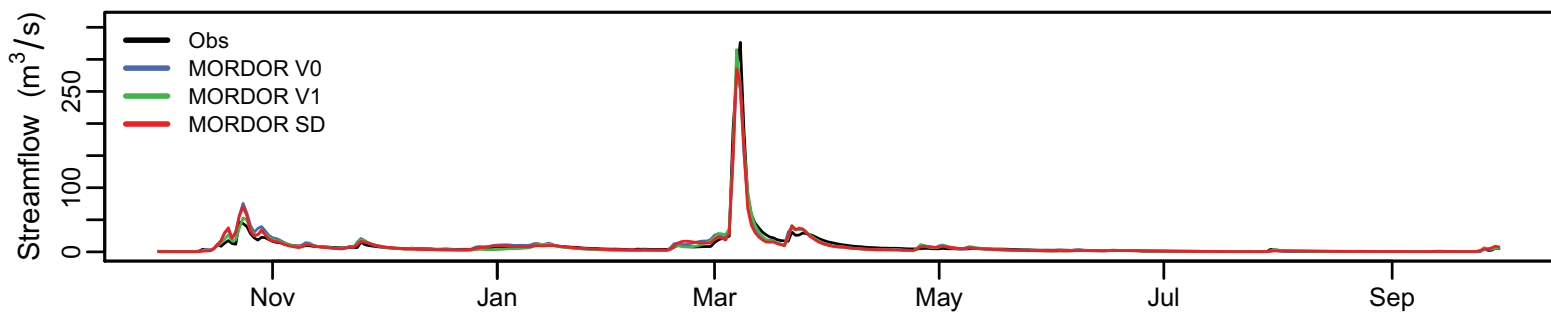

Year 1992

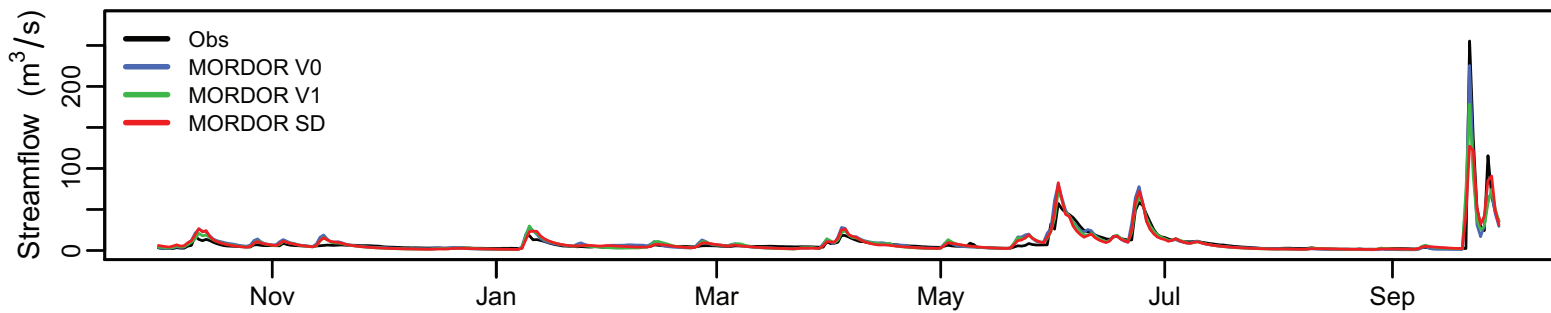

# Chassezac@SteMarguerite

Year 1993

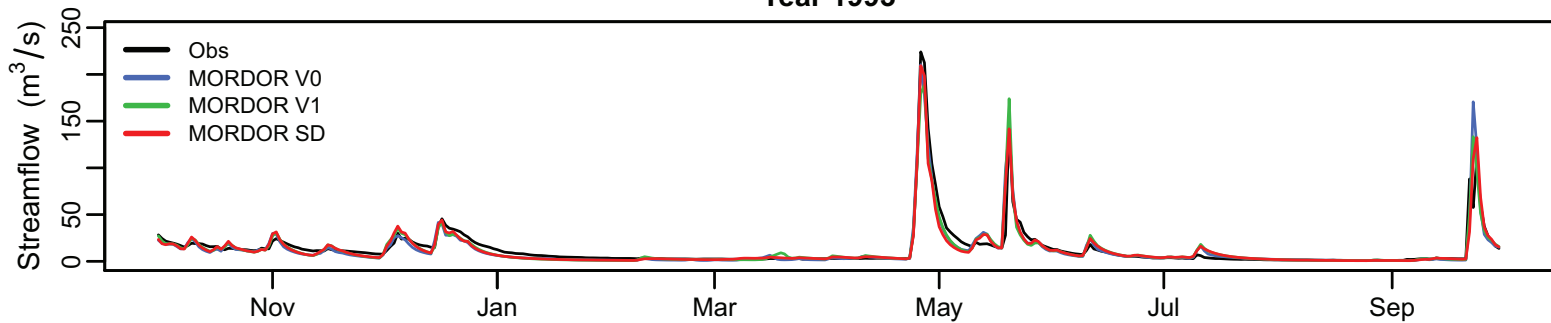

Year 1994

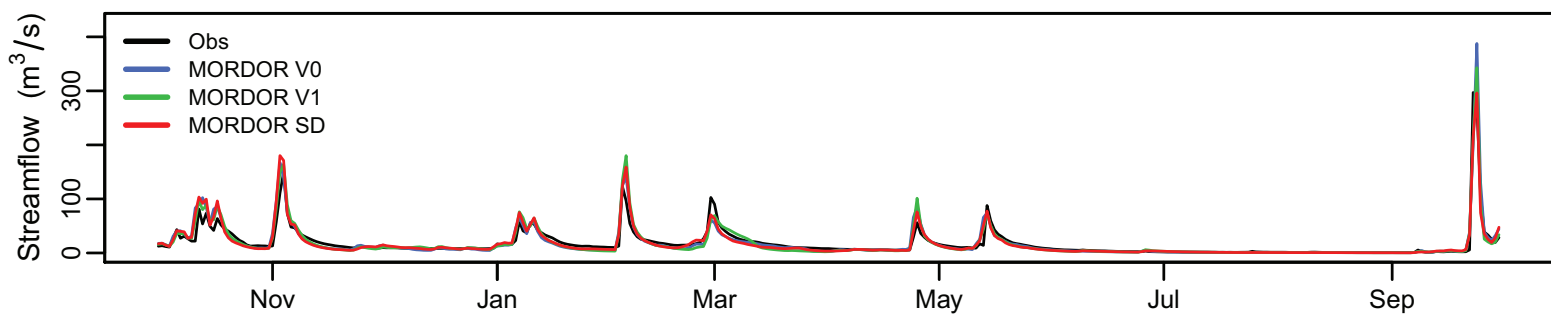

Year 1995

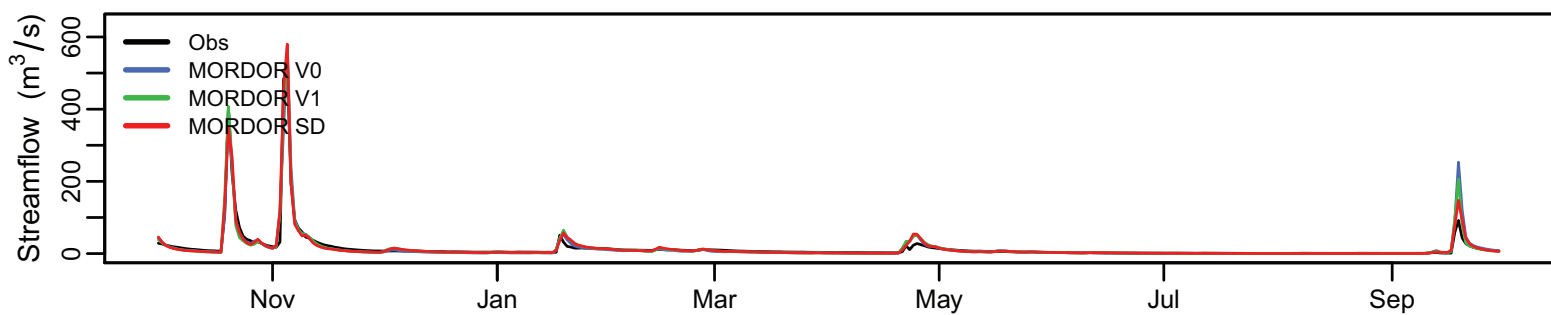

Year 1996

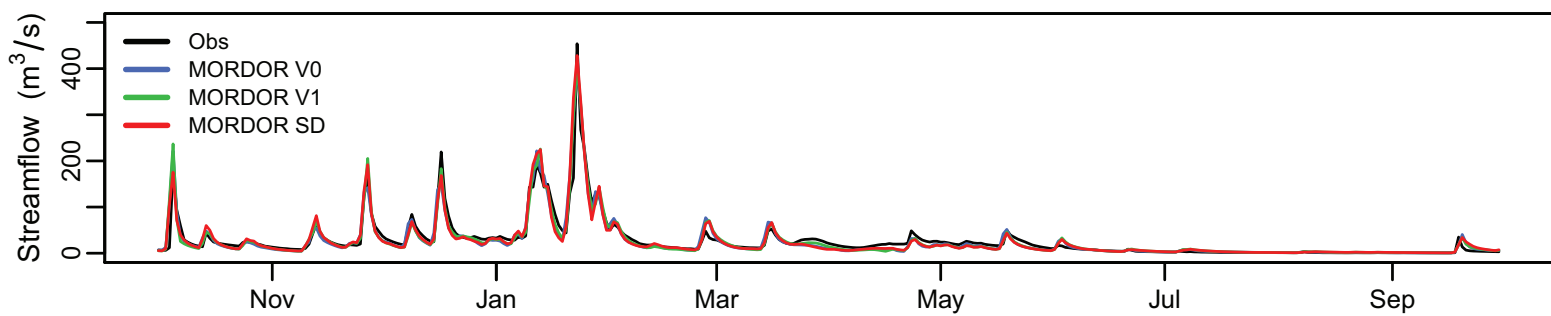

Year 1997

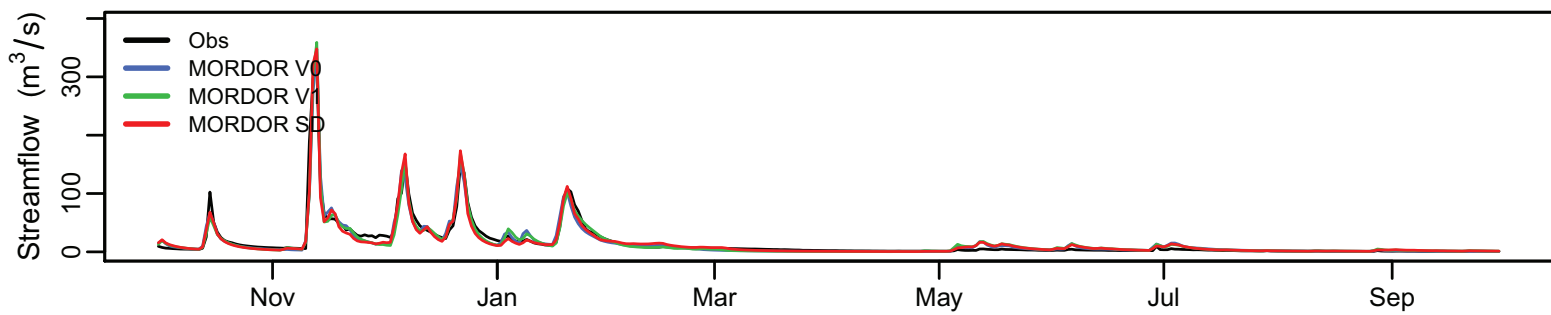

Year 1998

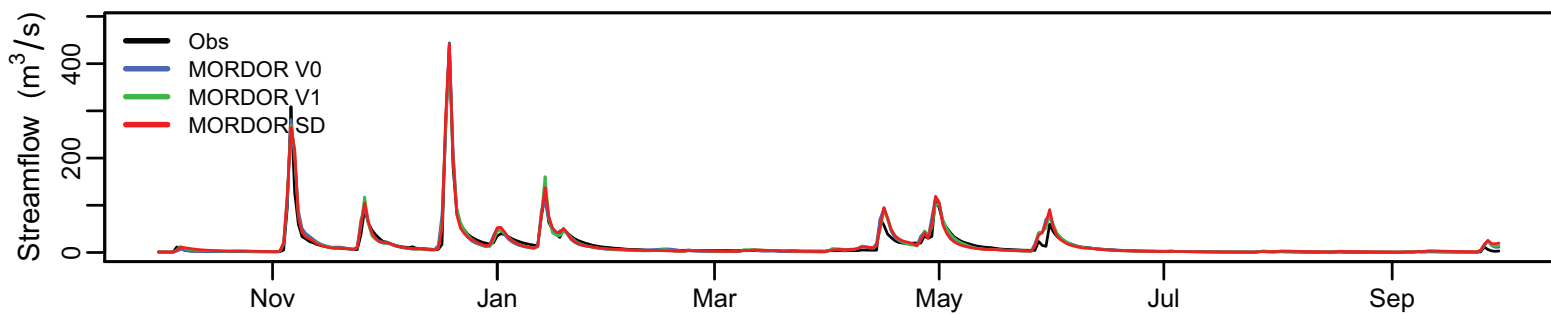

# Chassezac@SteMarguerite

Year 1999

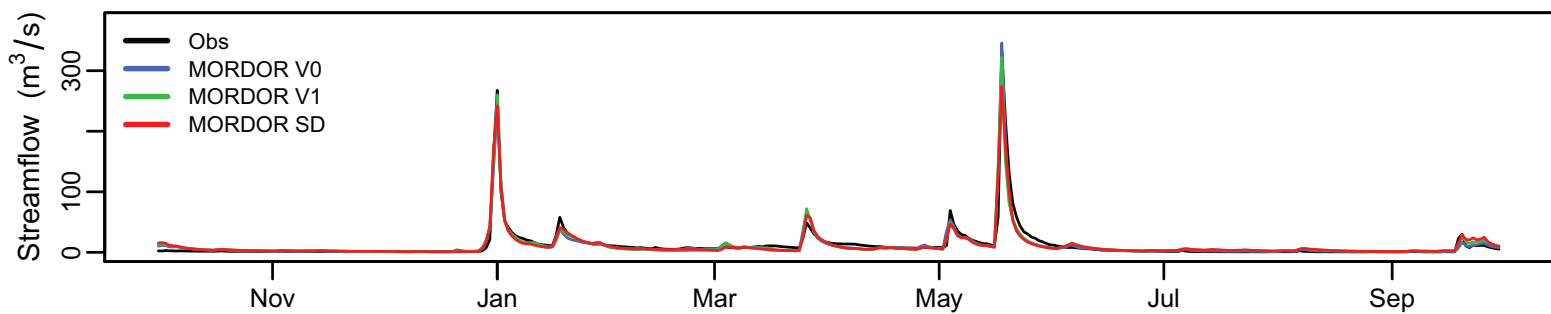

Year 2000

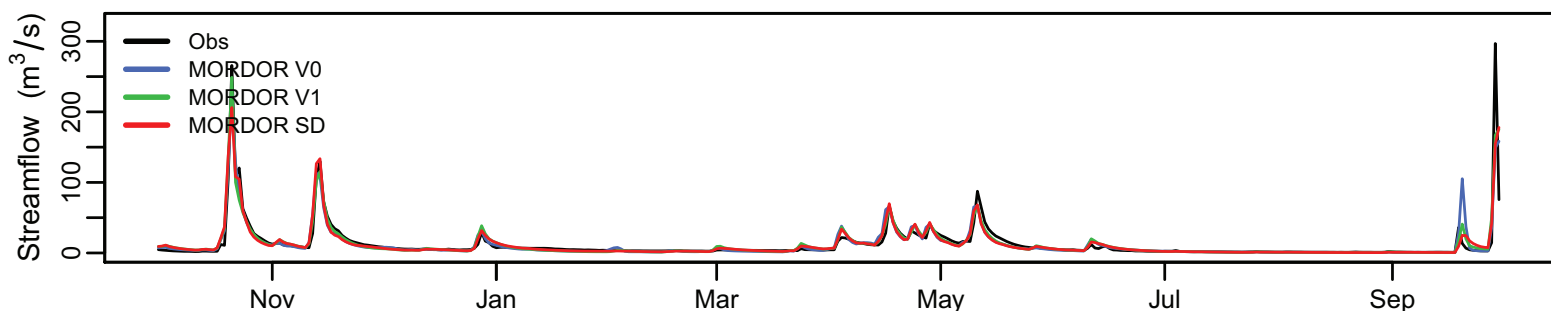

Year 2001

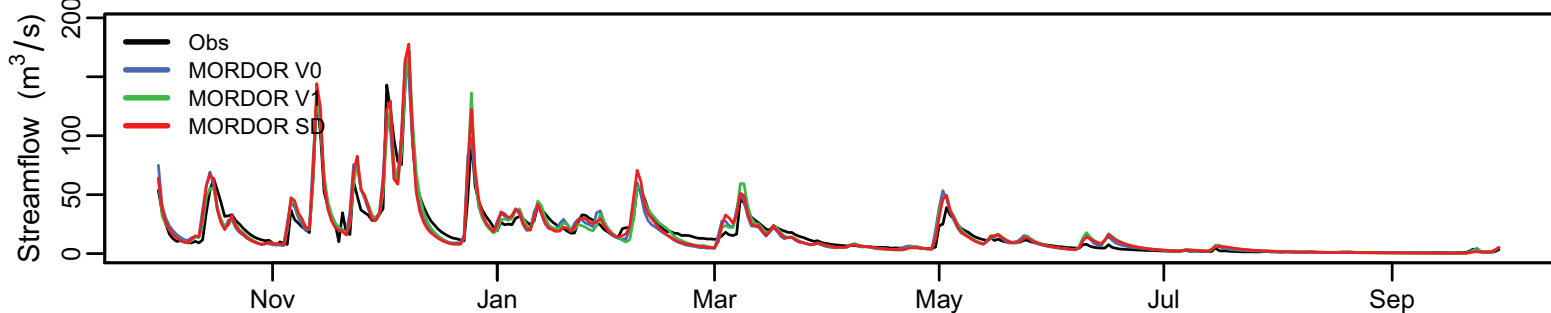

Year 2002

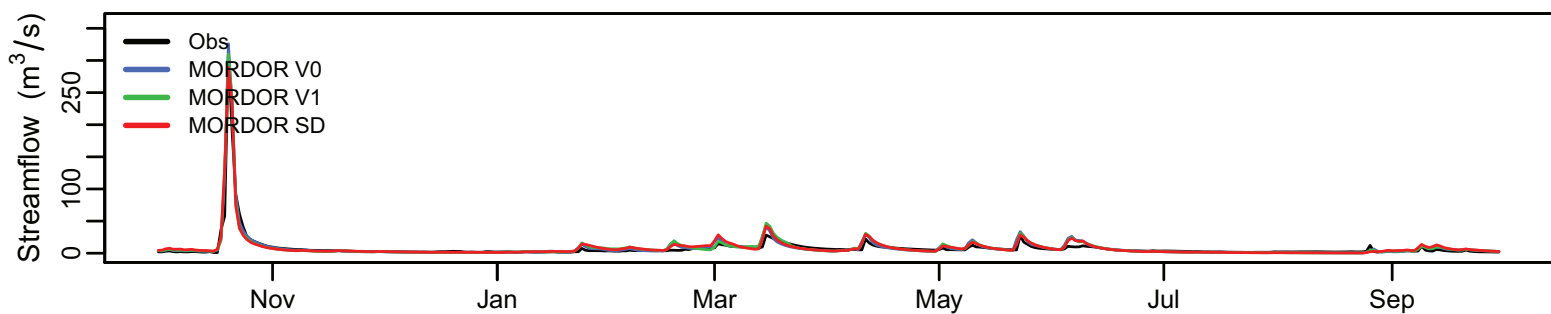

Year 2003

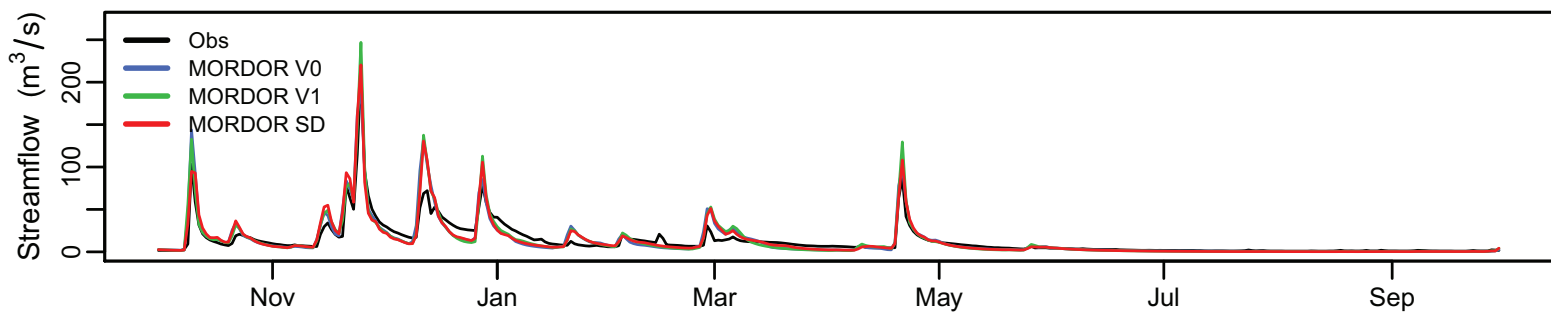

Year 2004

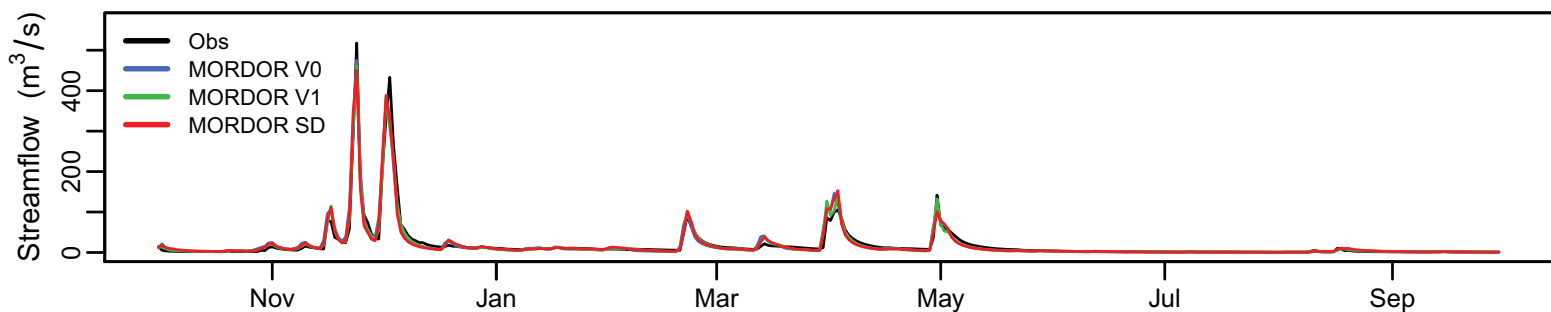

# Chassezac@SteMarguerite

Year 2005

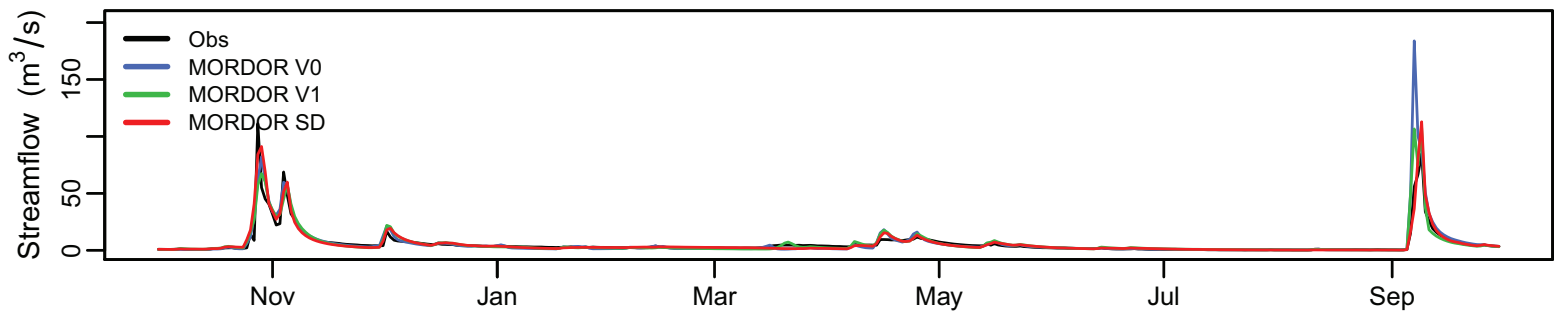

Year 2006

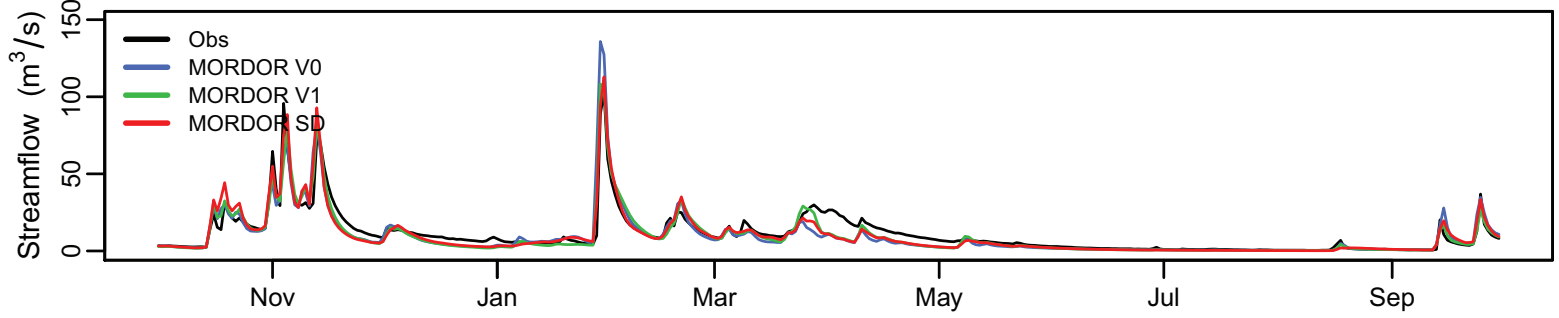

# Creuse@Age

Year 1961

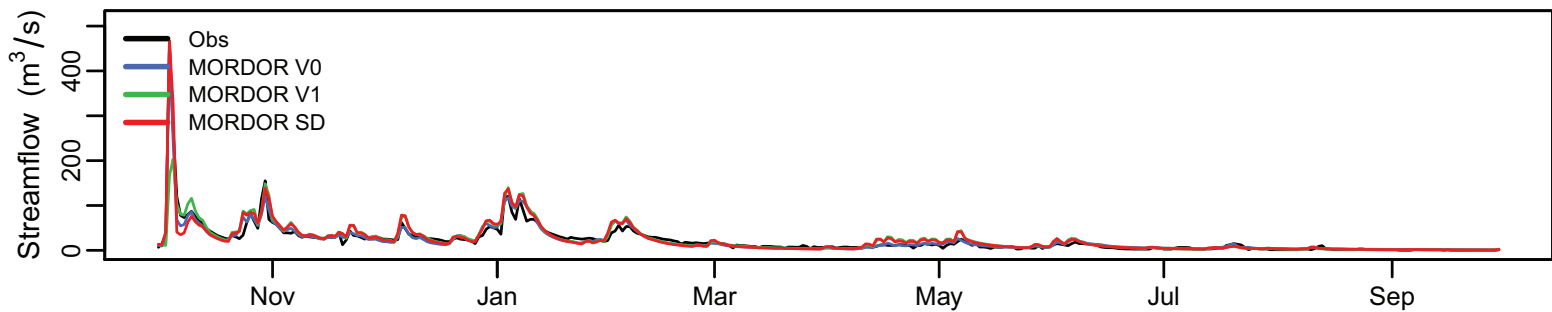

Year 1962

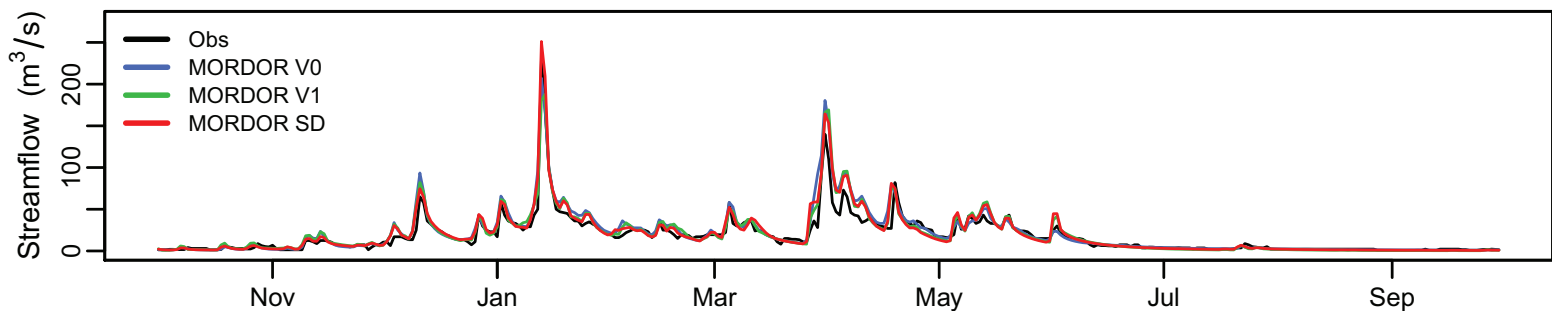

Year 1963

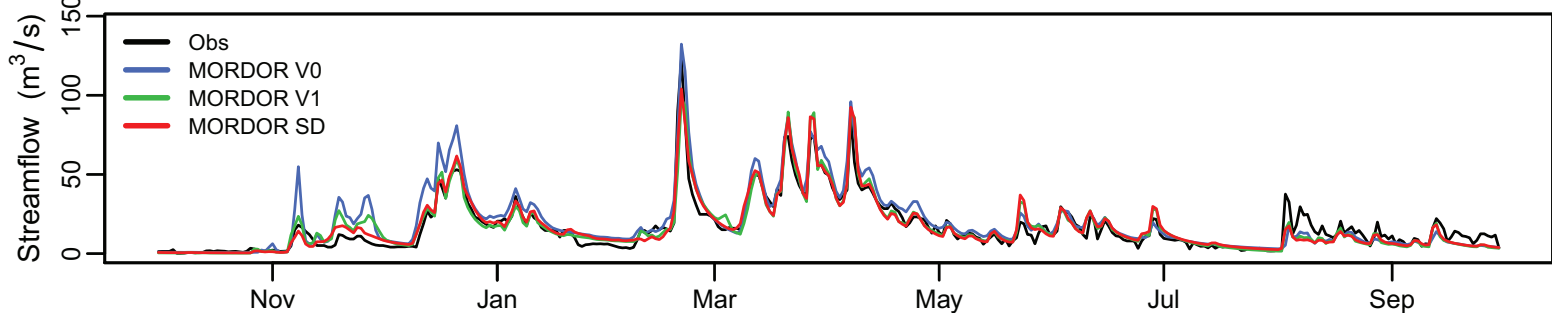

Year 1964

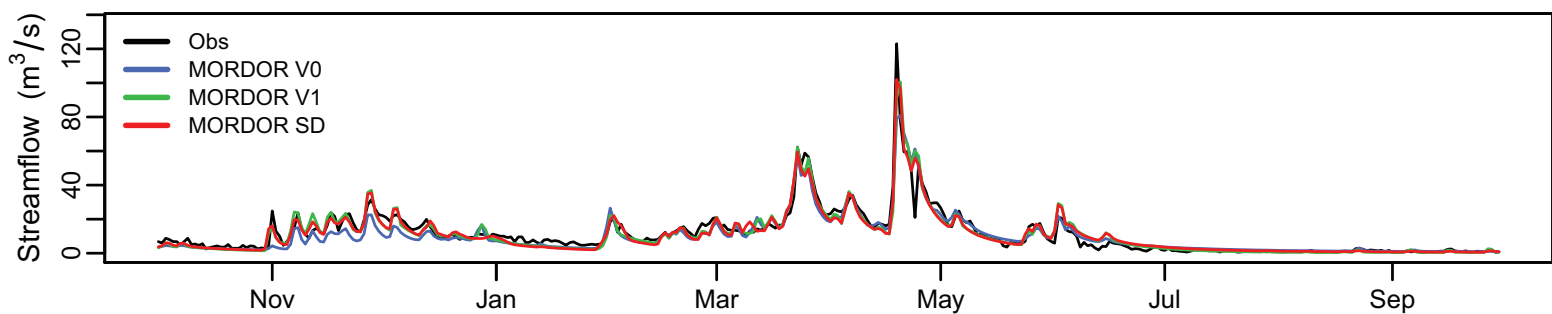

Year 1965

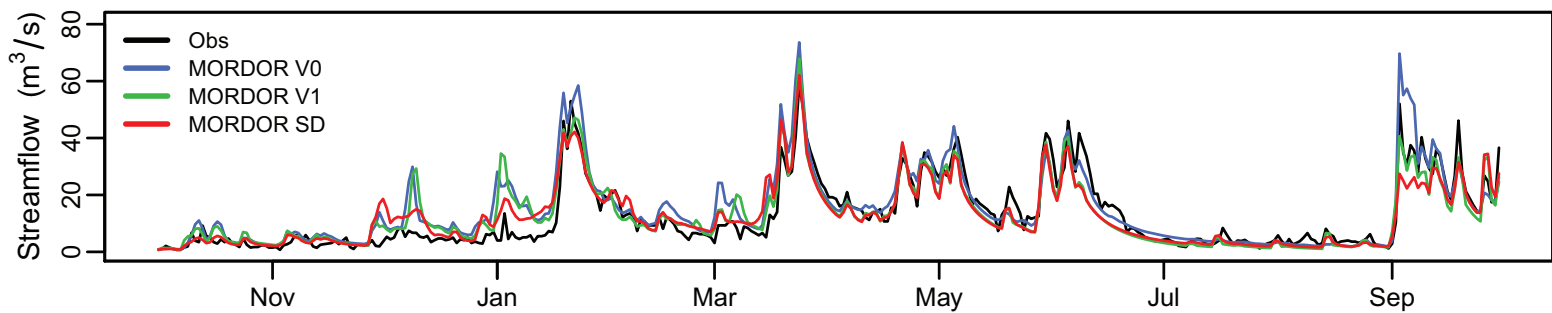

Year 1966

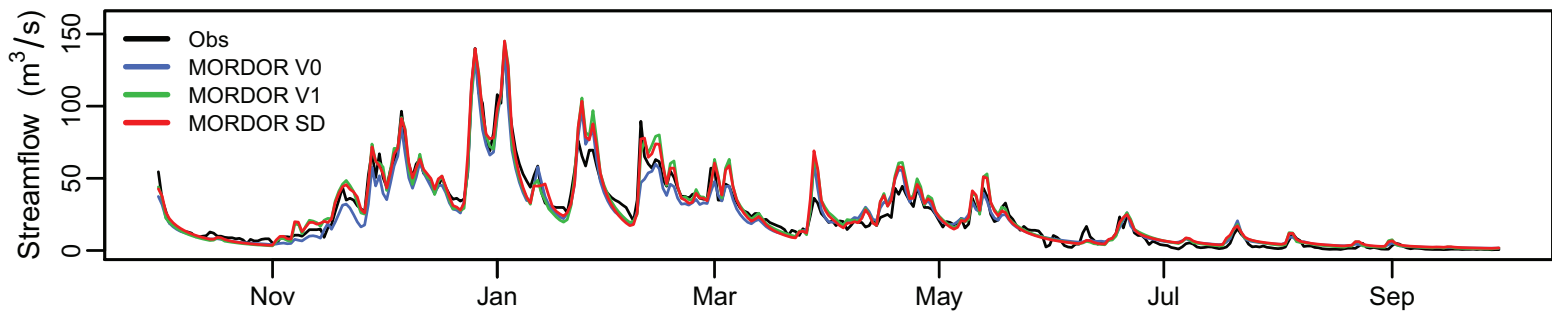

# Creuse@Age

Year 1967

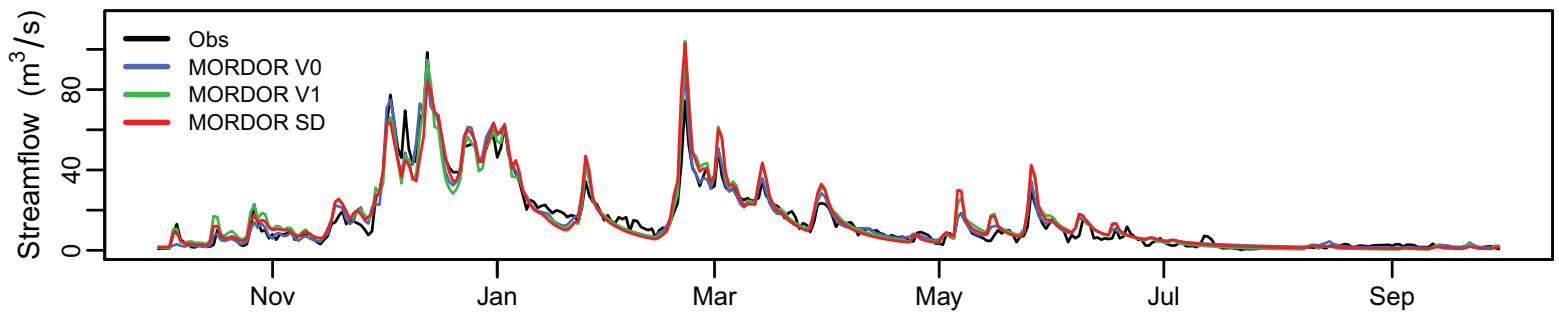

Year 1968

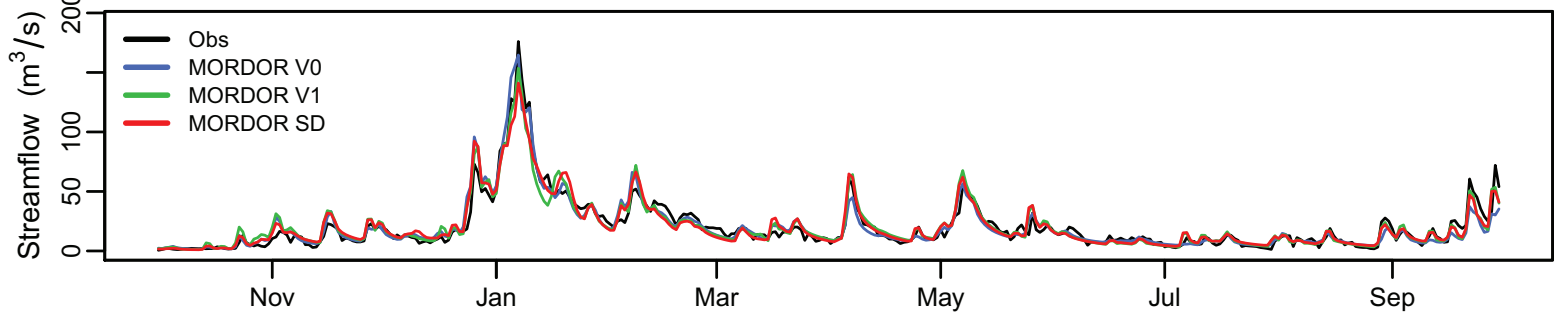

Year 1969

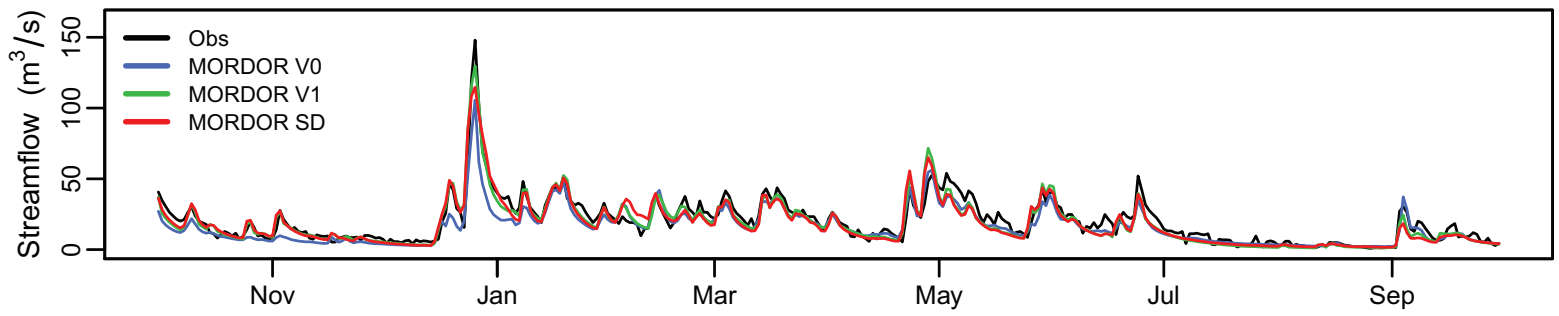

Year 1970

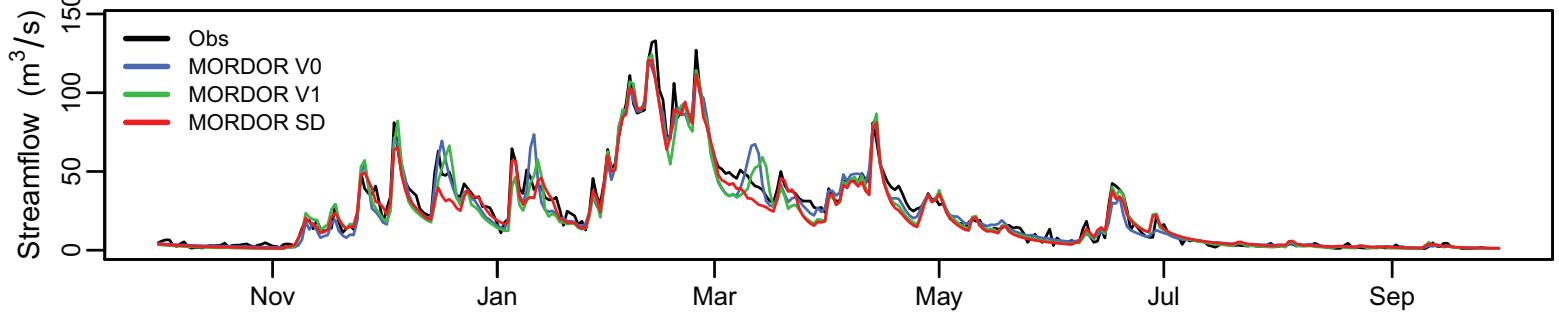

Year 1971

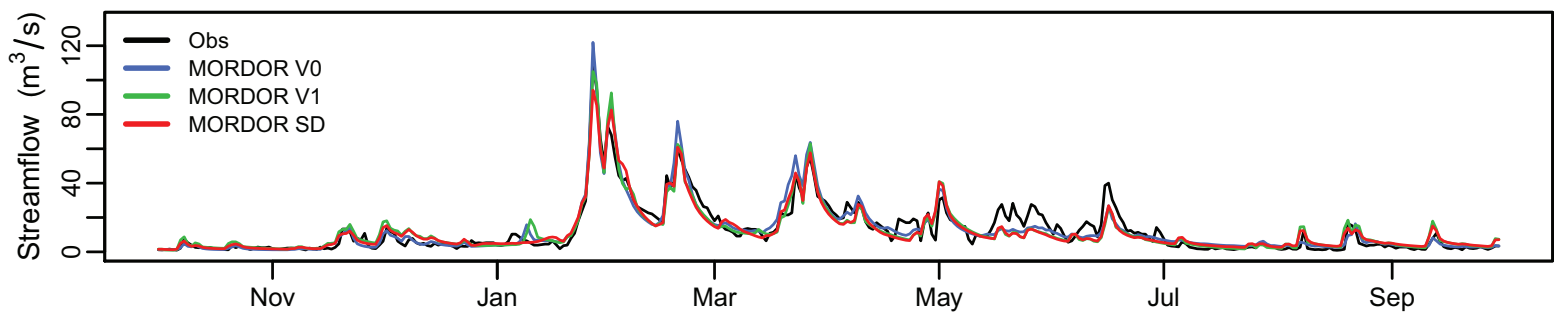

Year 1972

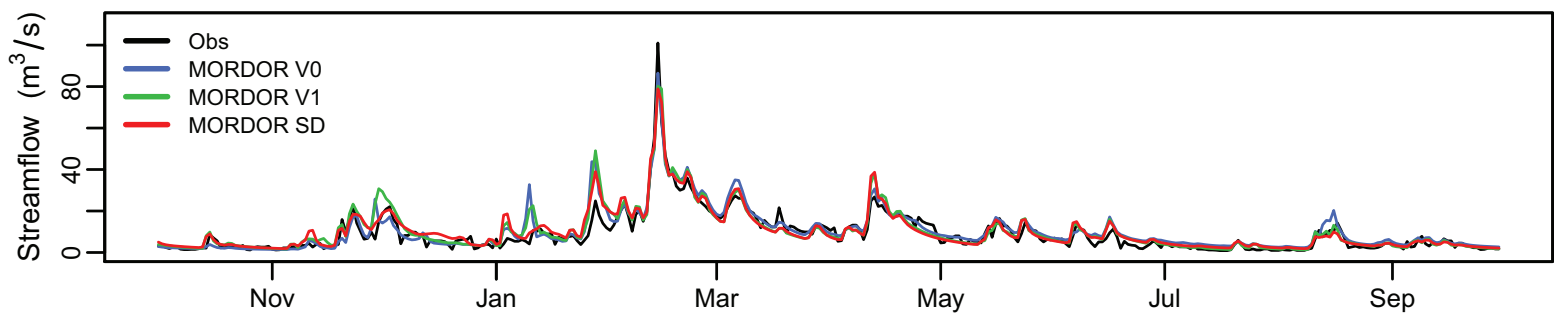



# Creuse@Age

Year 1973

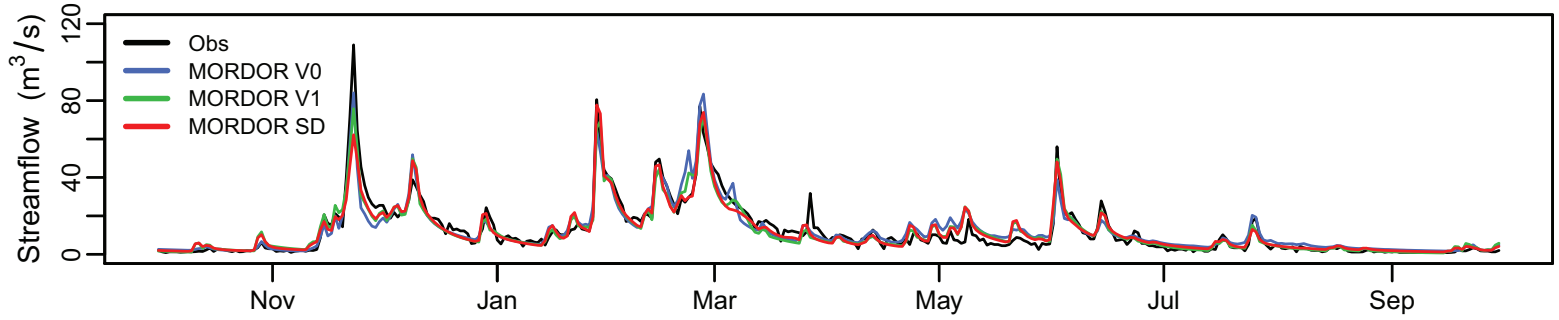

Year 1974

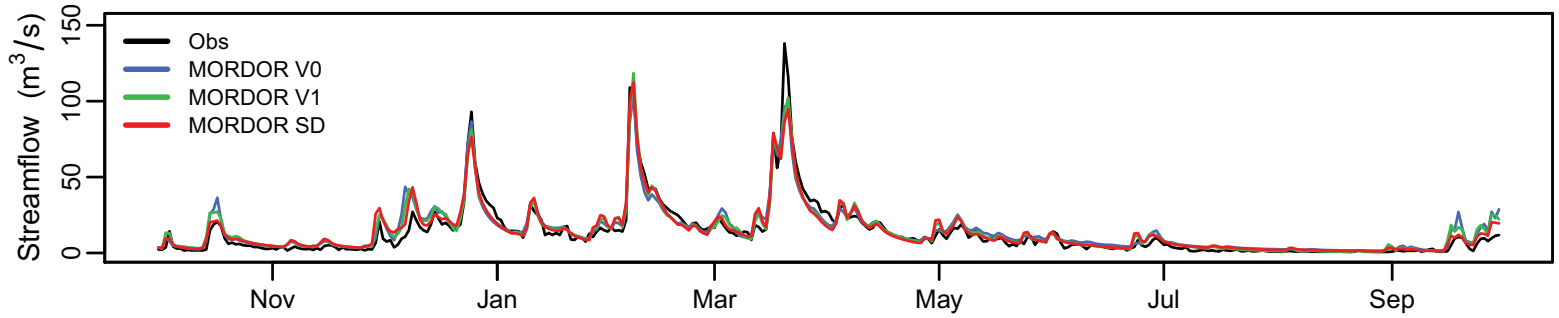

Year 1975

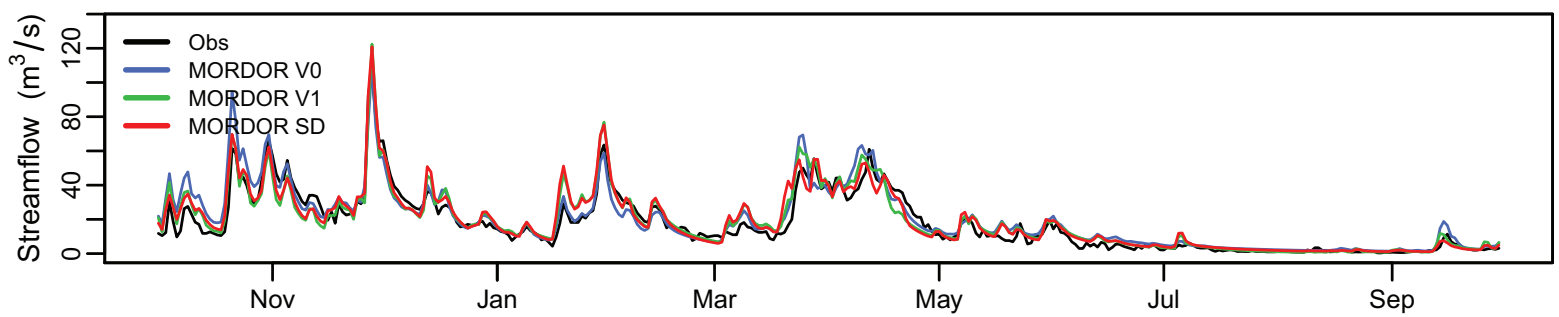

Year 1976

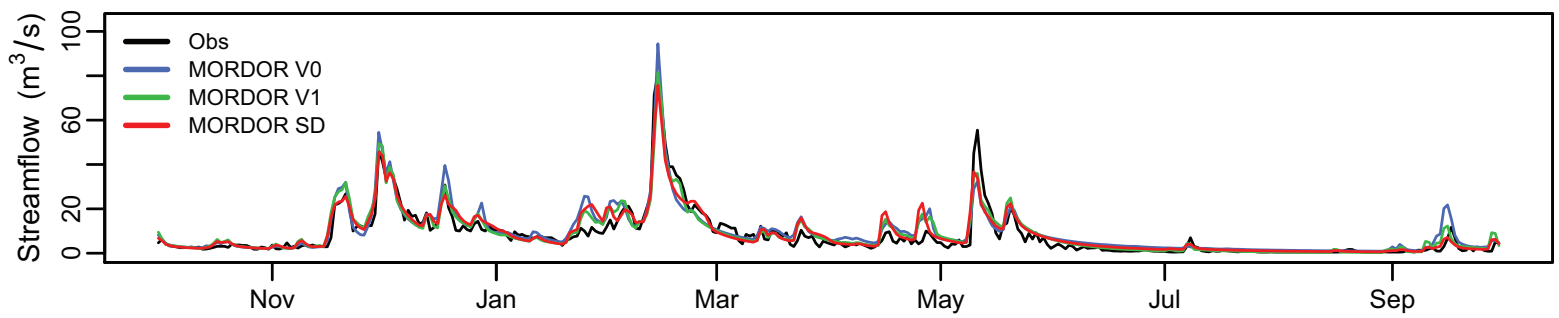

Year 1977

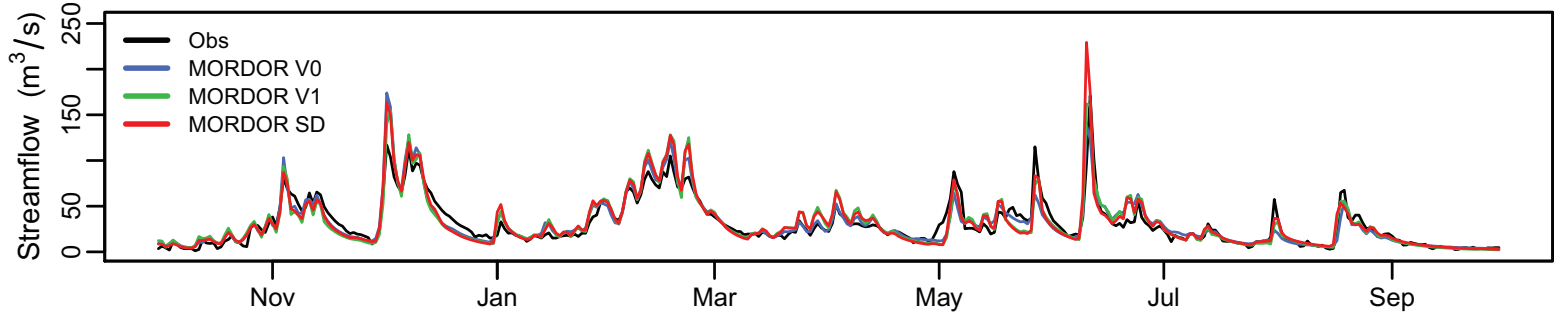

Year 1978

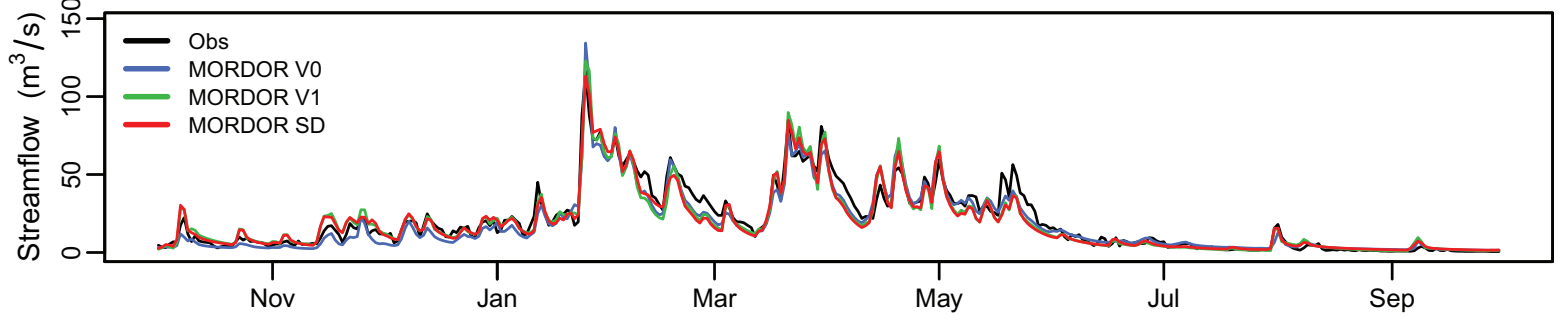

# Creuse@Age

Year 1979

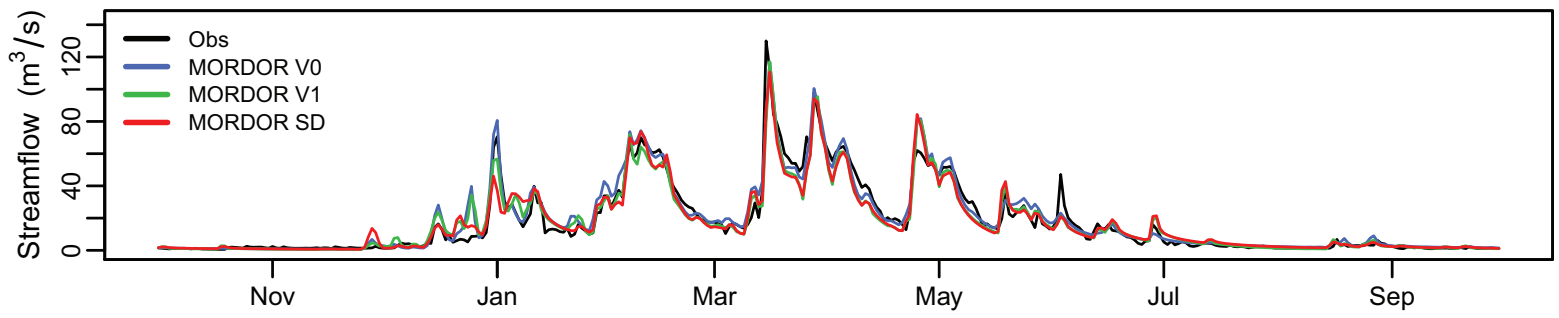

Year 1980

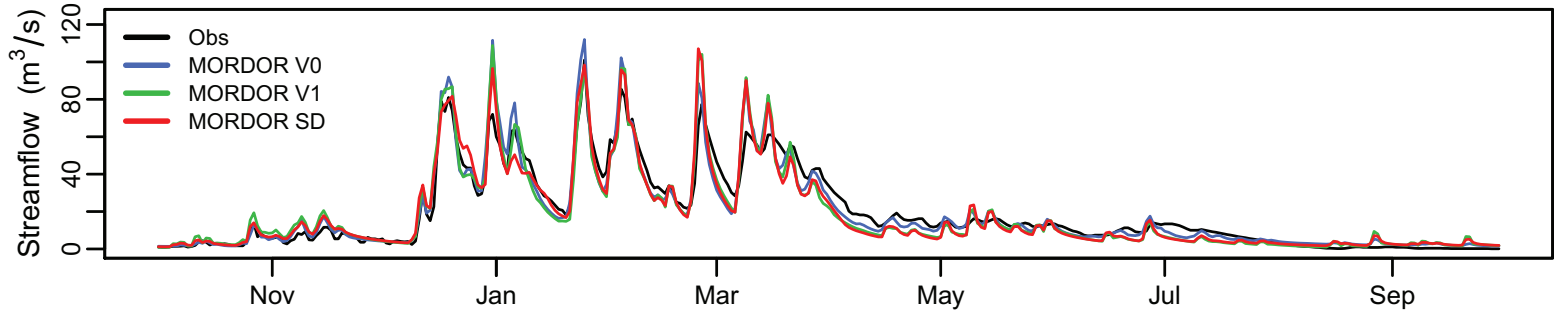

Year 1981

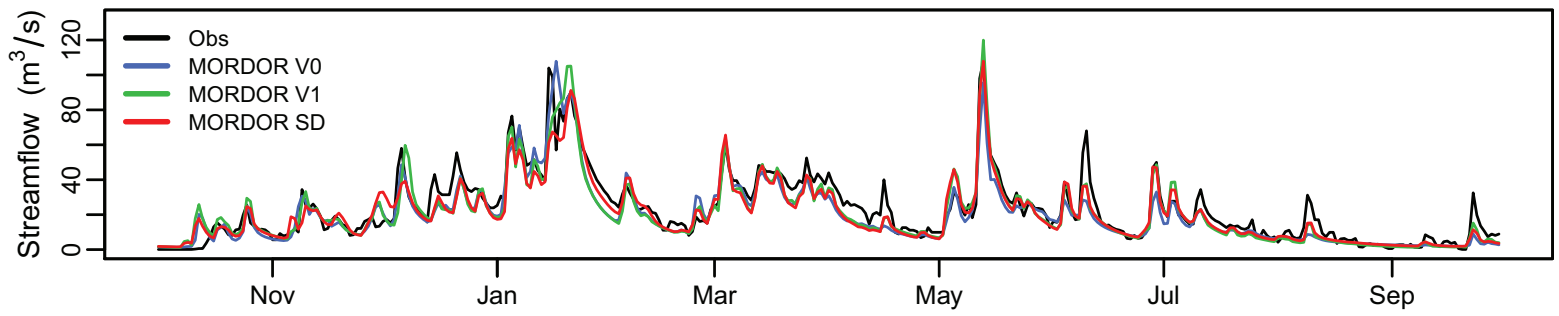

Year 1982

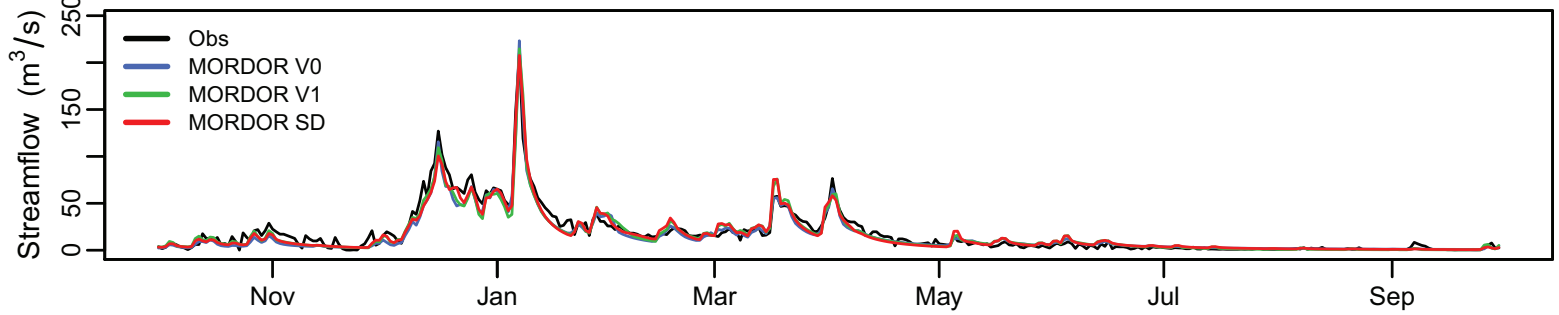

Year 1983

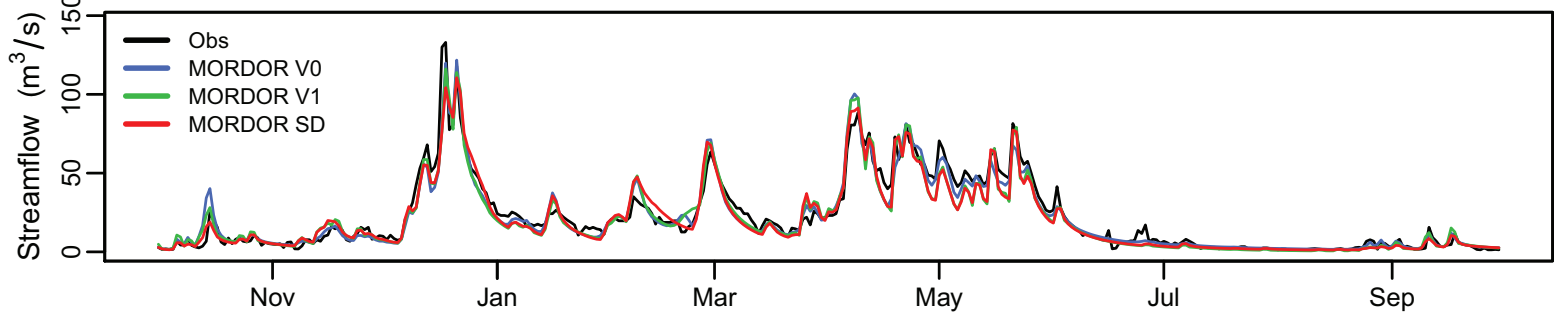

Year 1984

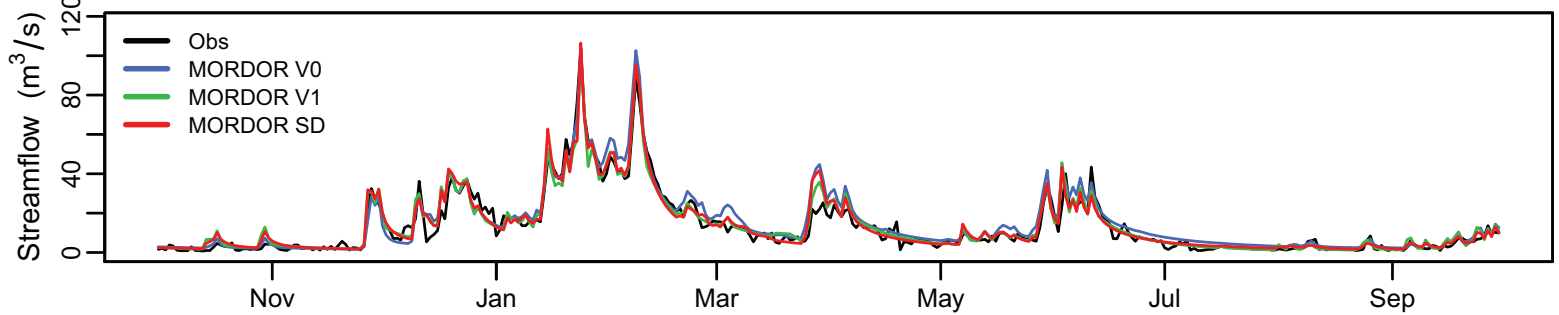

# Creuse@Age

Year 1985

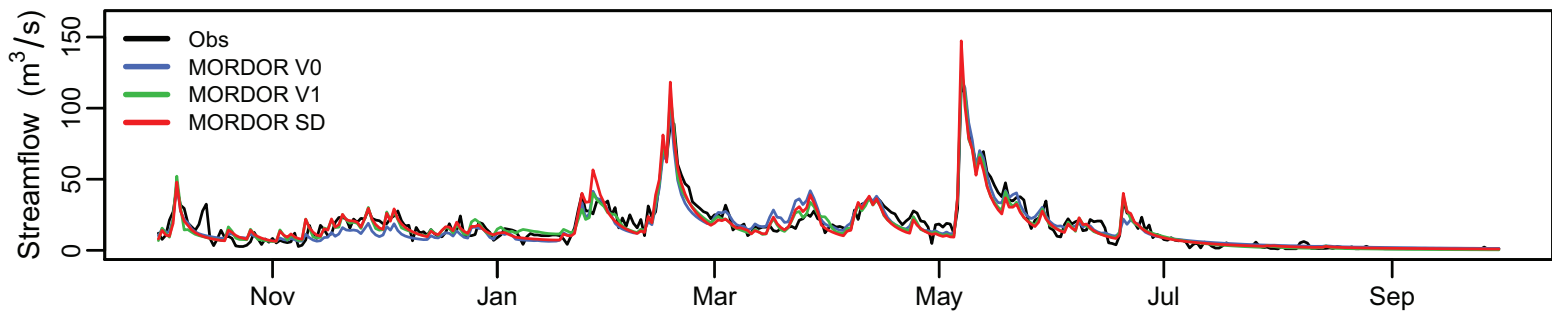

Year 1986

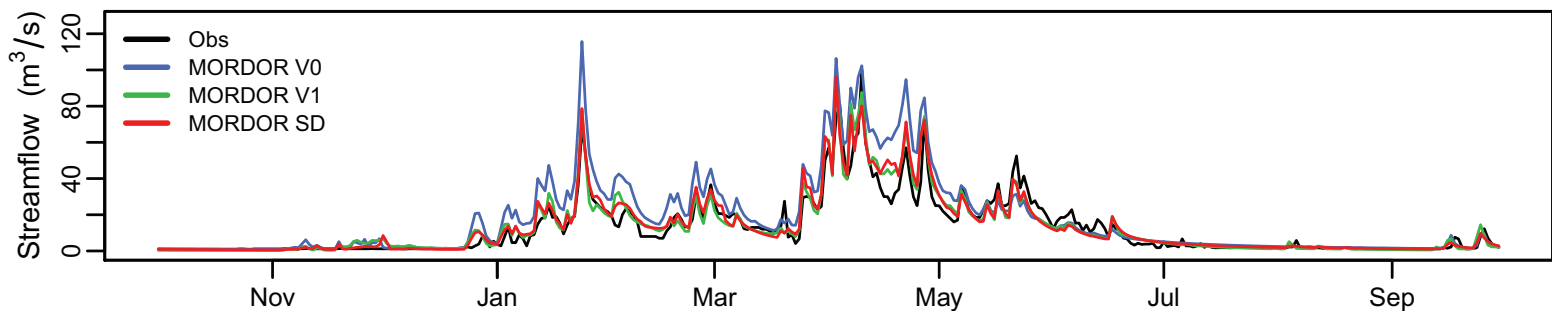

Year 1987

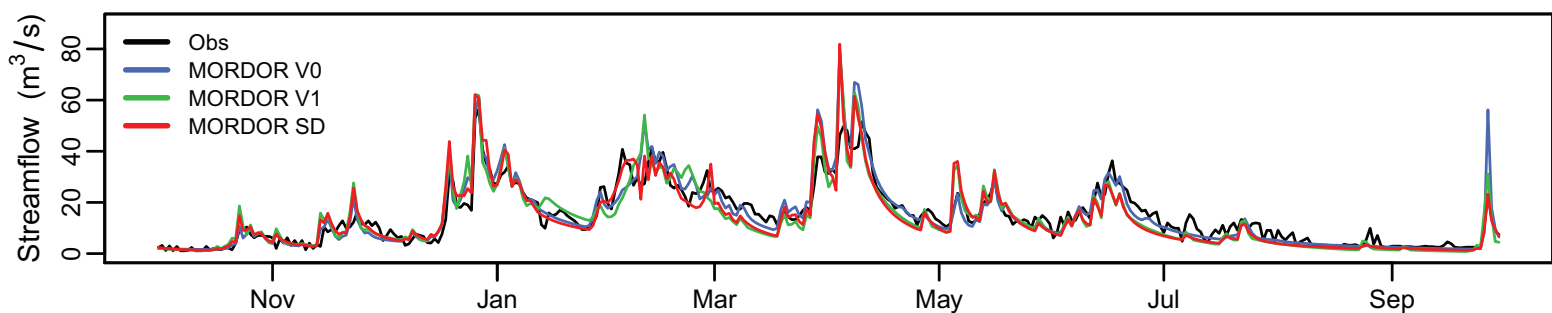

Year 1988

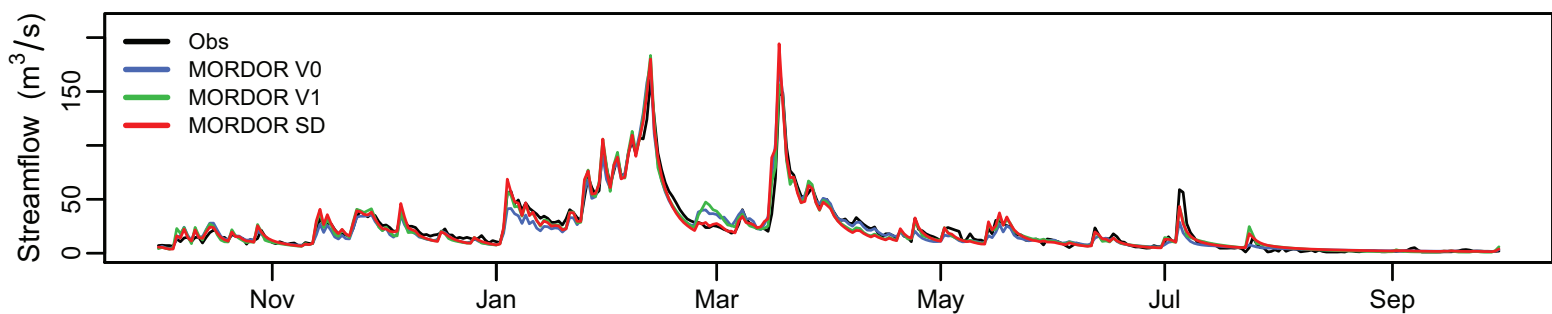

Year 1989

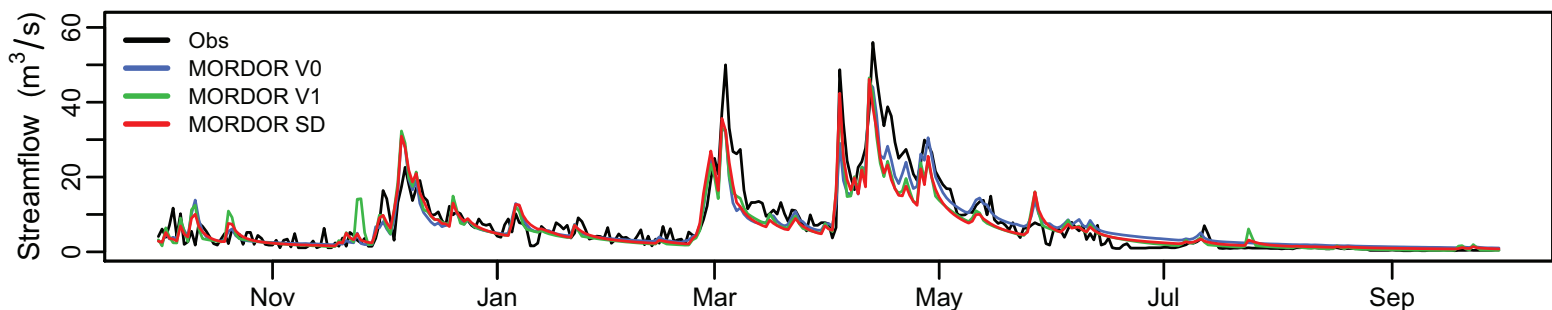

Year 1990

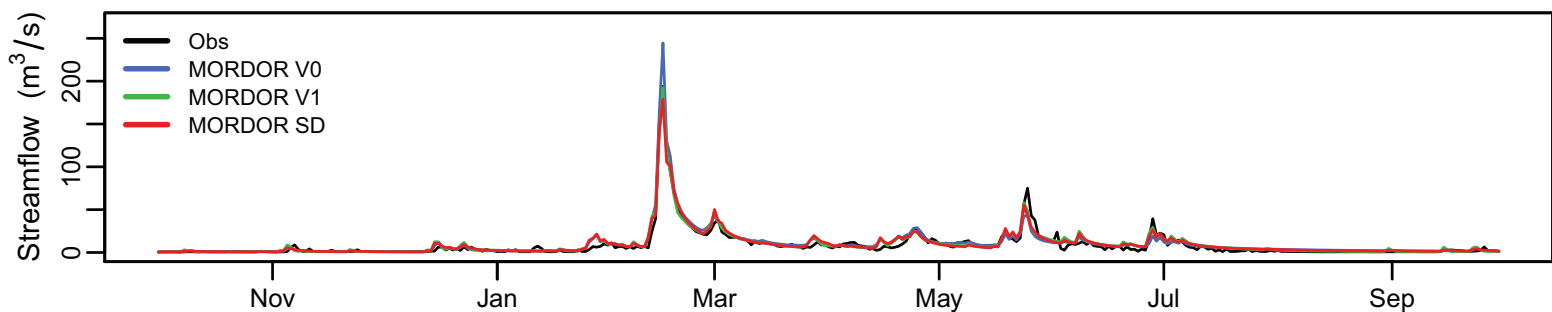

# Creuse@Age

Year 1991

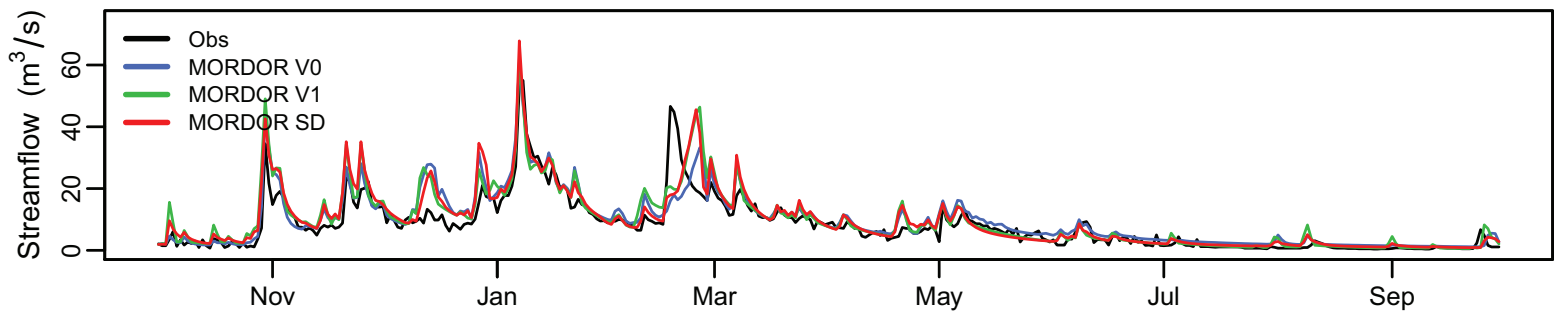

Year 1992

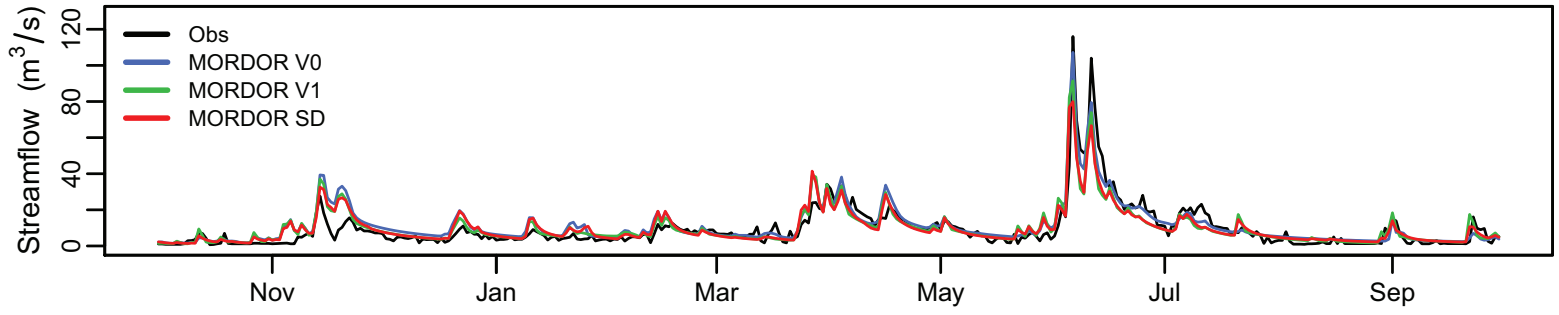

Year 1993

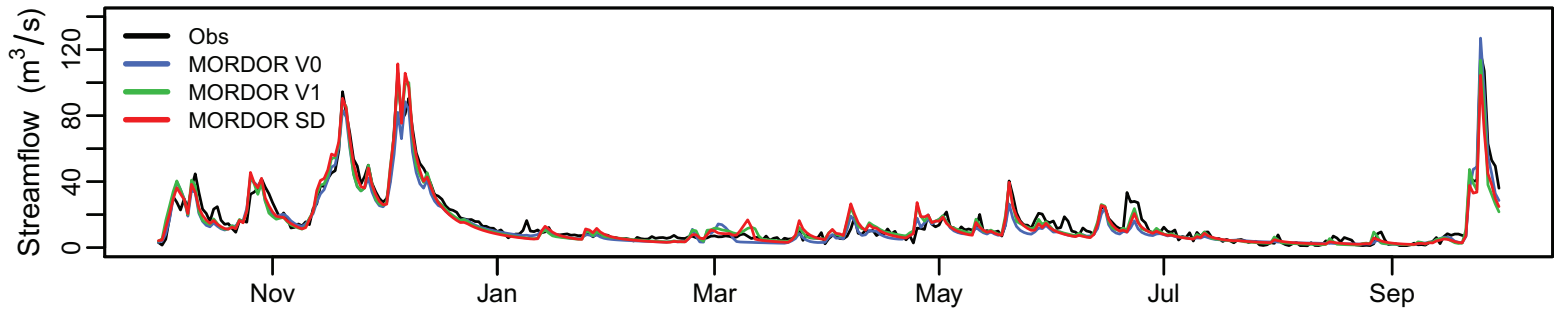

Year 1994

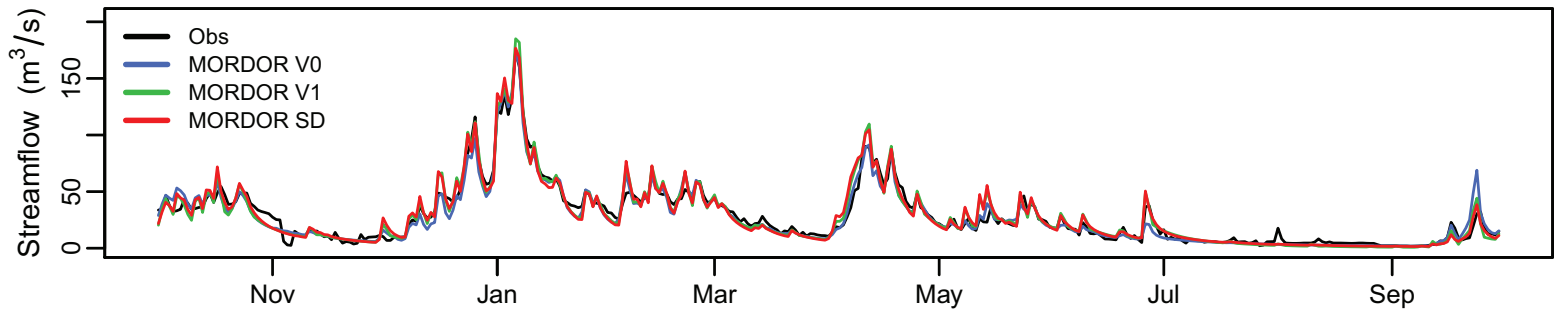

Year 1995

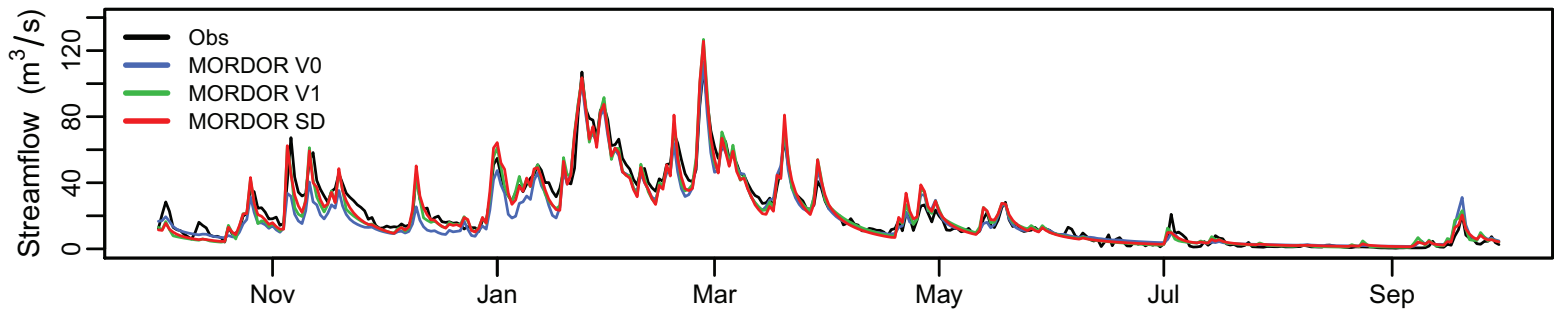

Year 1996

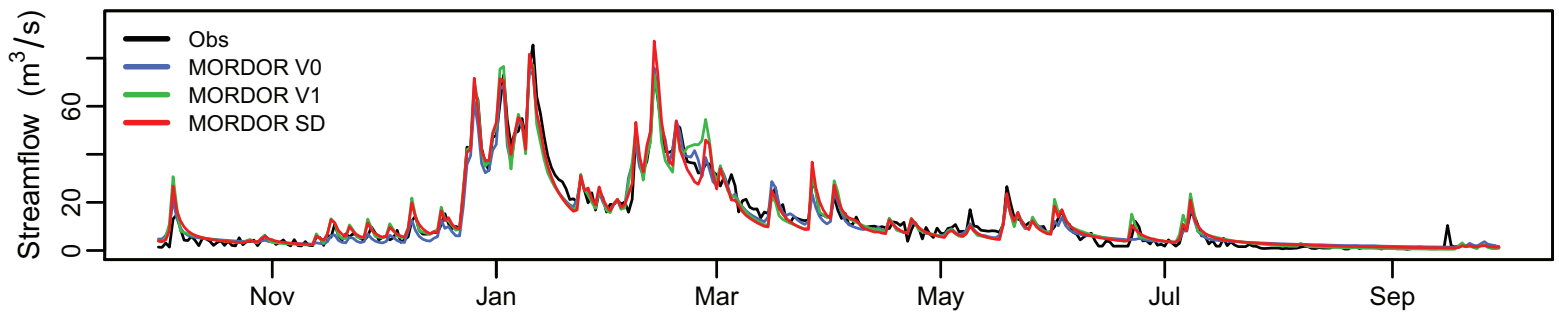

# Creuse@Age

Year 1997

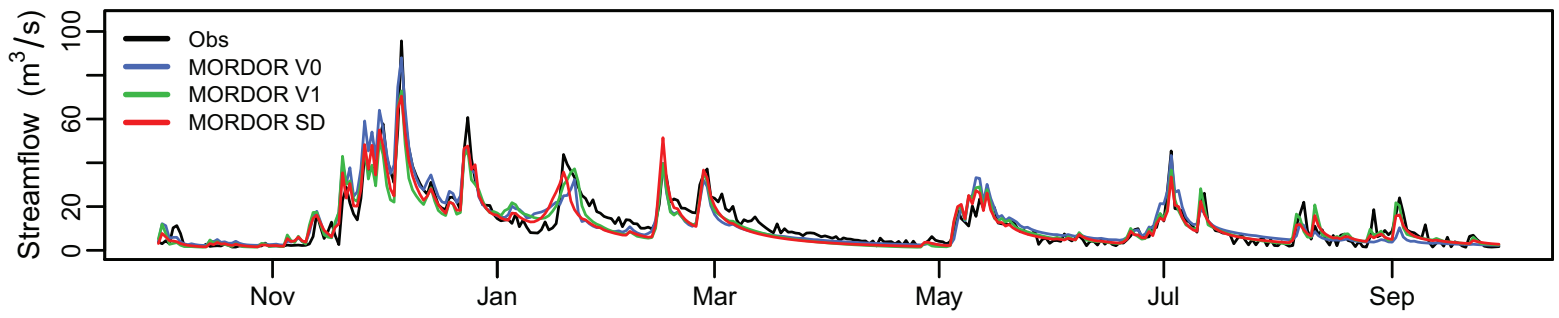

Year 1998

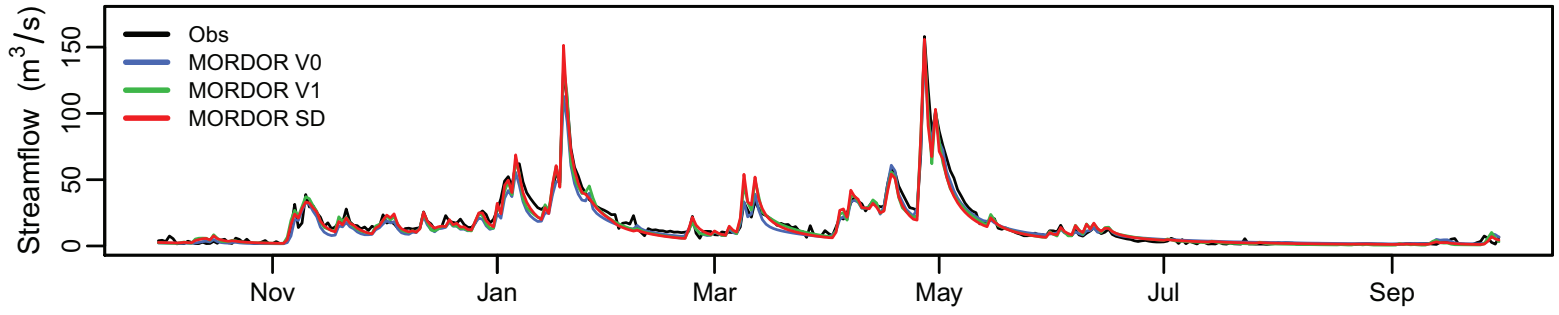

Year 1999

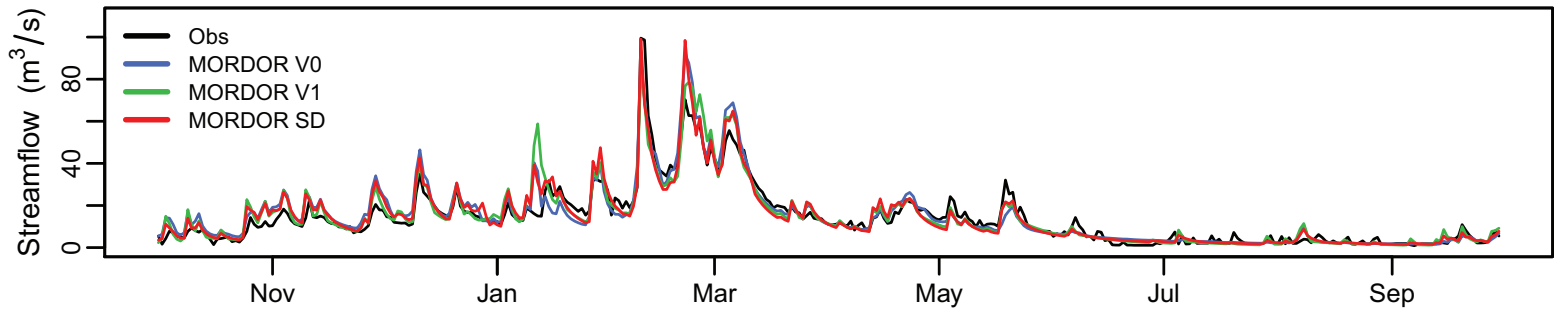

Year 2000

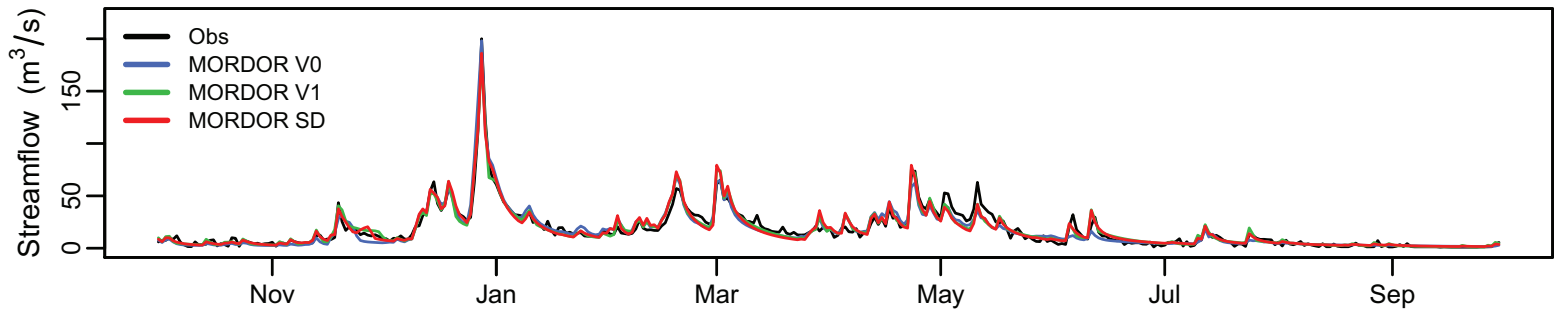

Year 2001

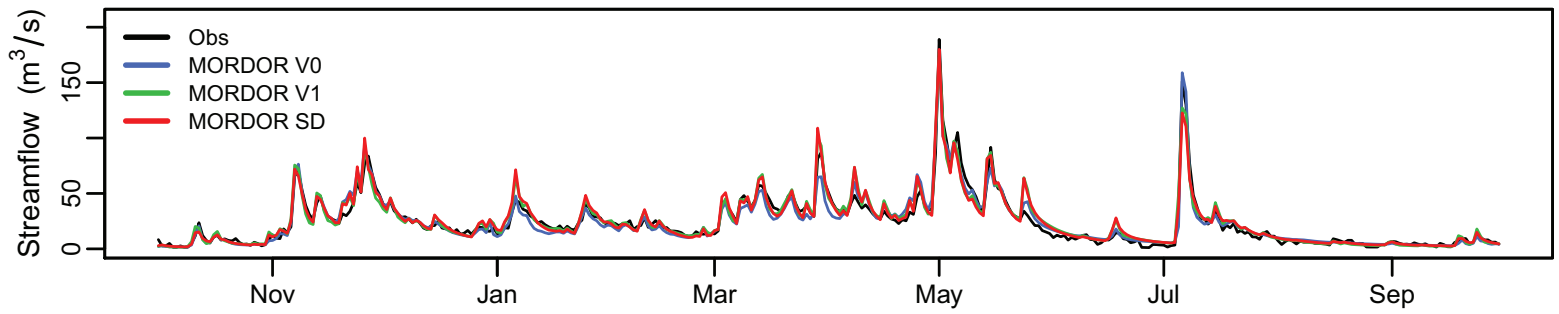

Year 2002

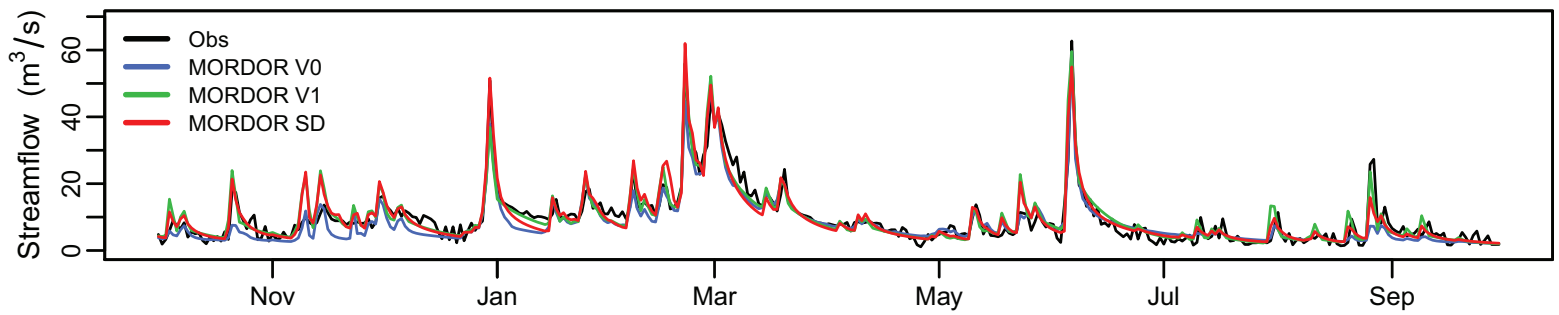

# Creuse@Age

Year 2003

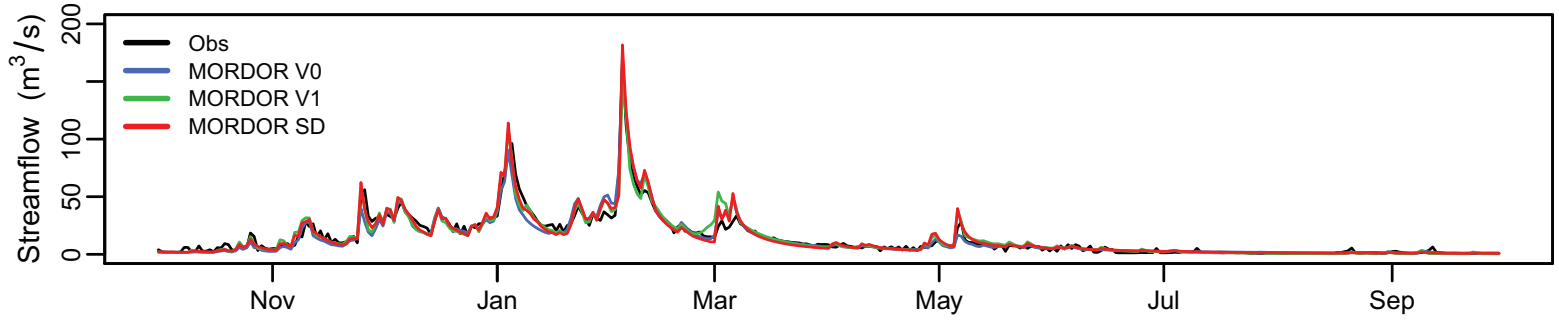

Year 2004

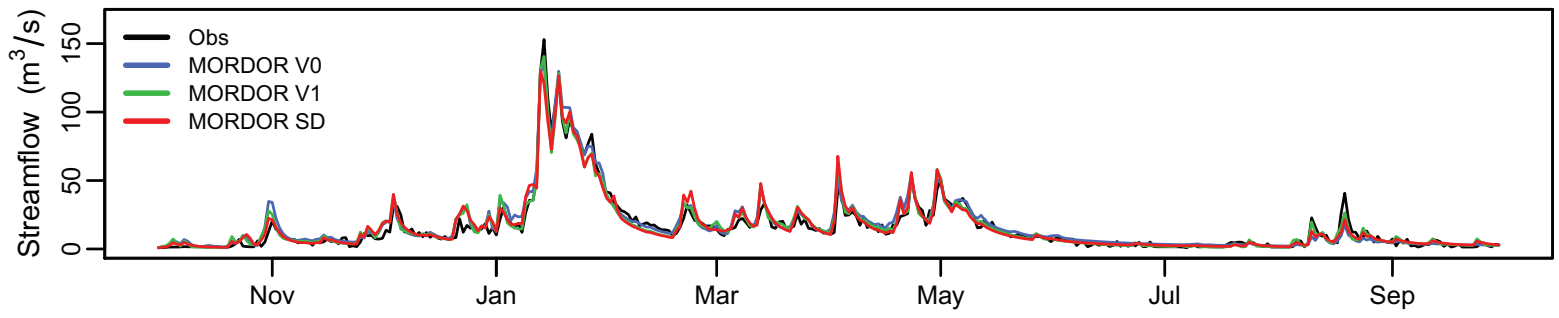

Year 2005

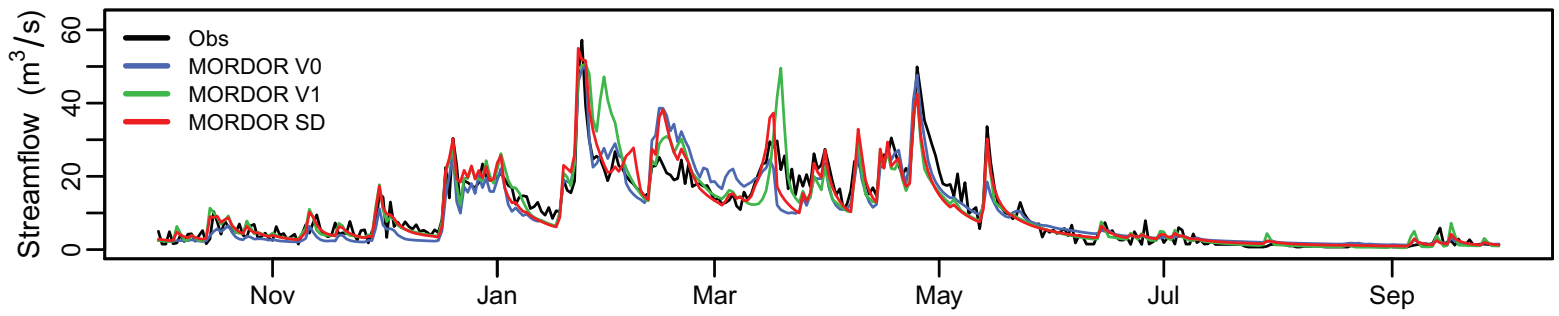

# Dordogne@Bort

Year 1980

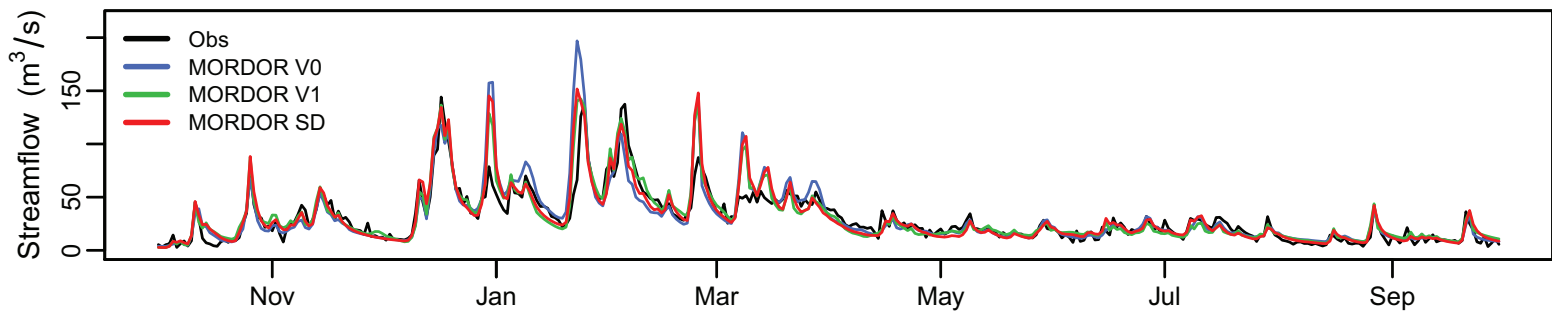

Year 1981

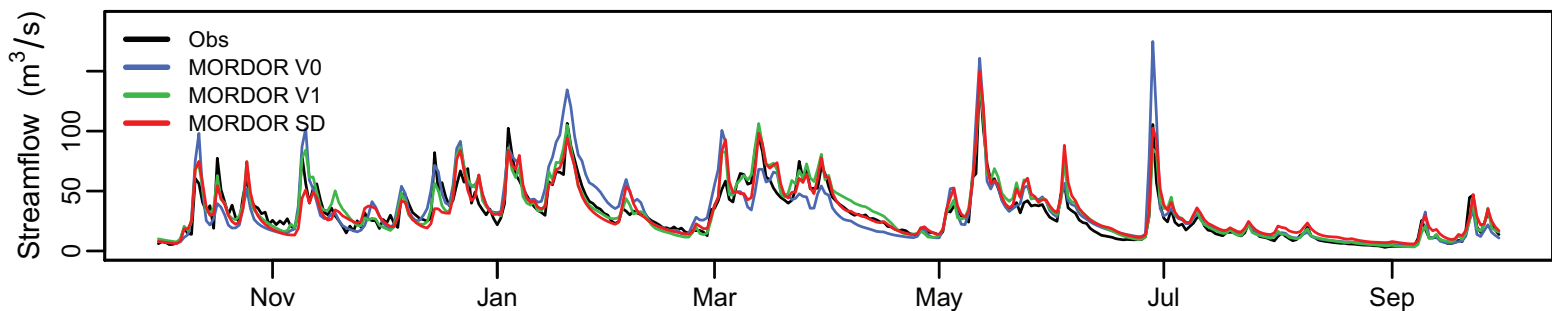

Year 1982

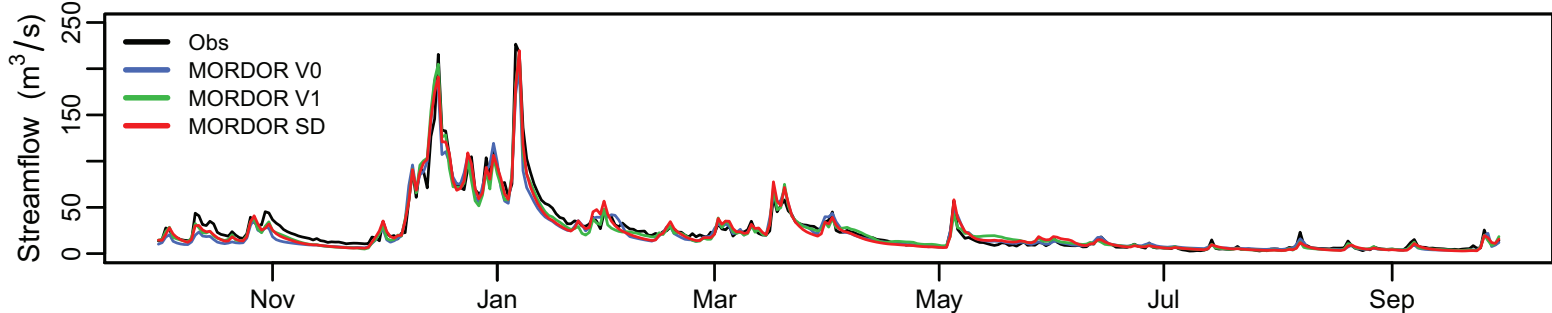

Year 1983

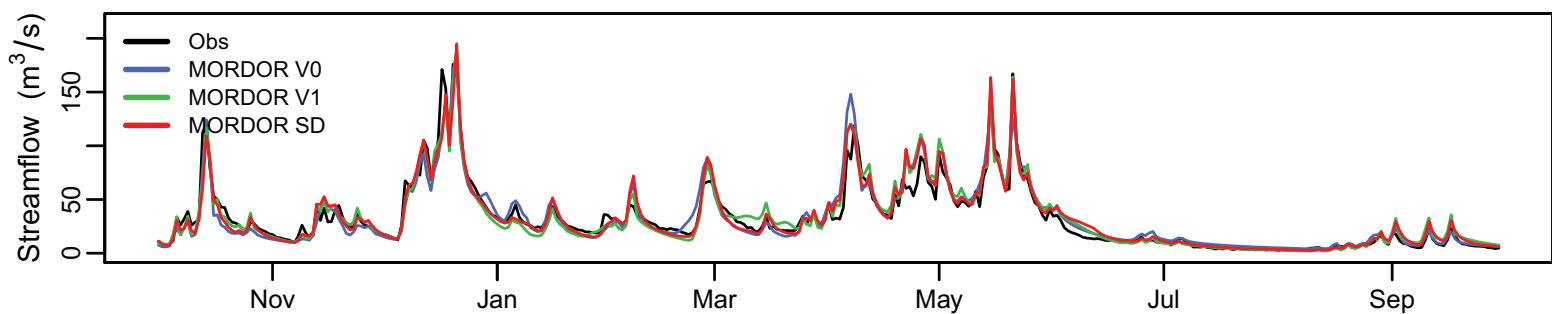

Year 1984

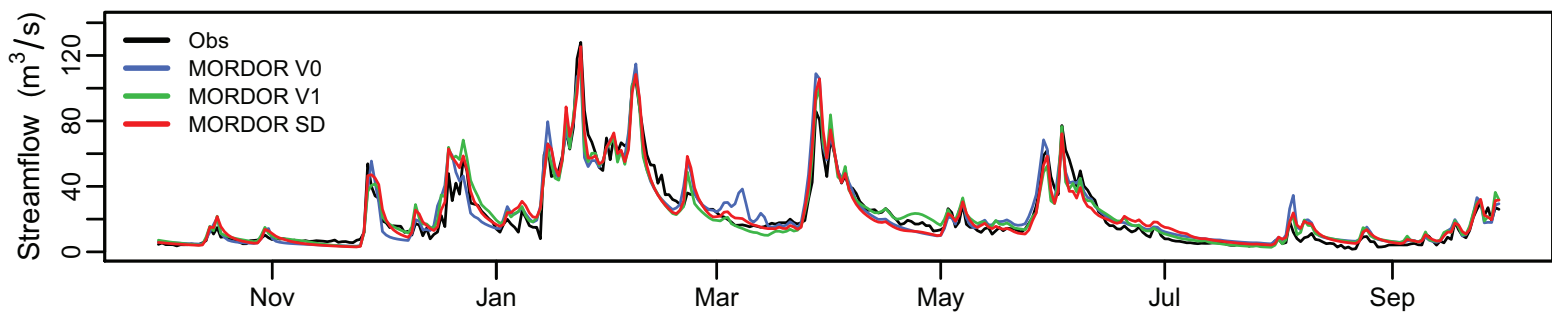

Year 1985

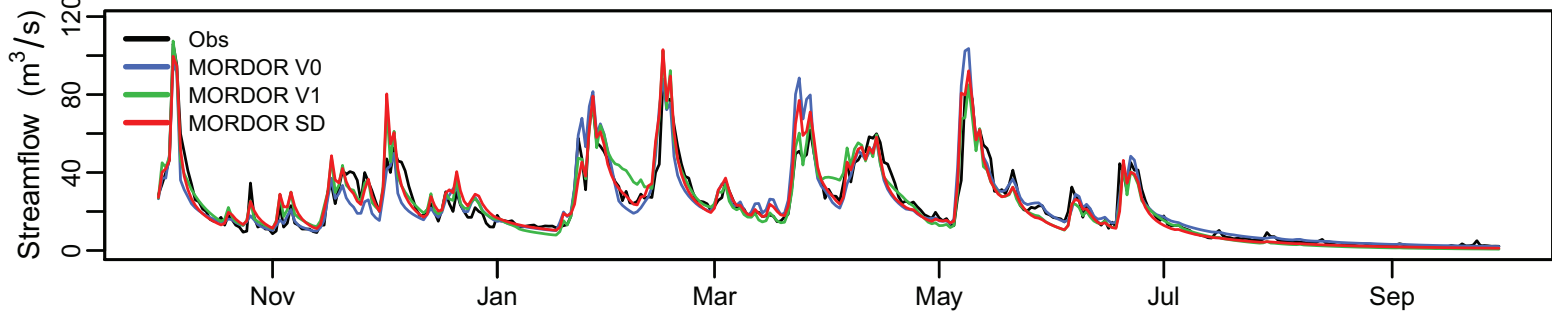

# Dordogne@Bort

Year 1986

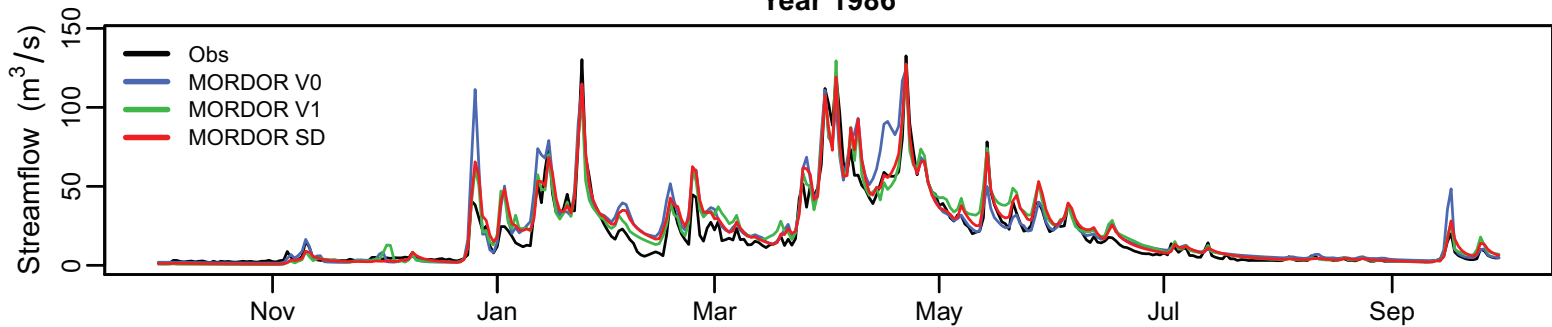

Year 1987

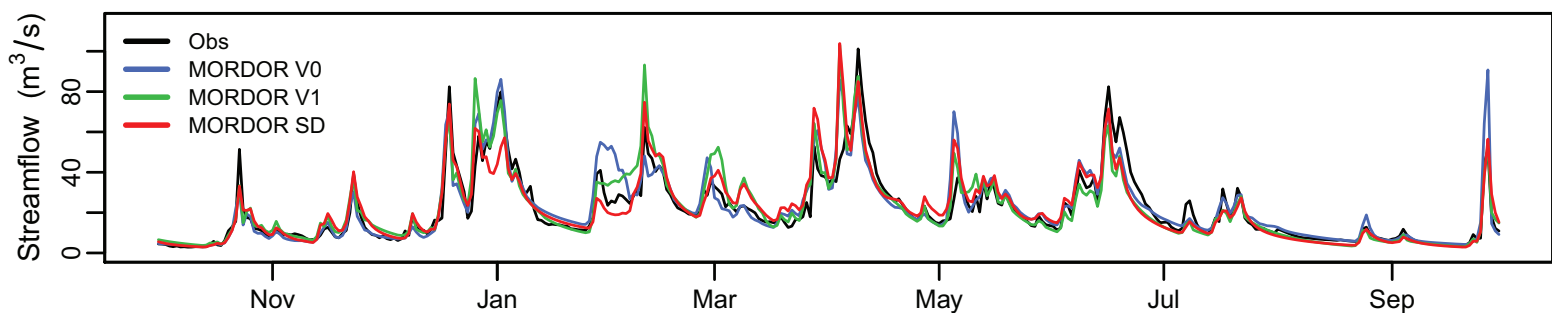

Year 1988

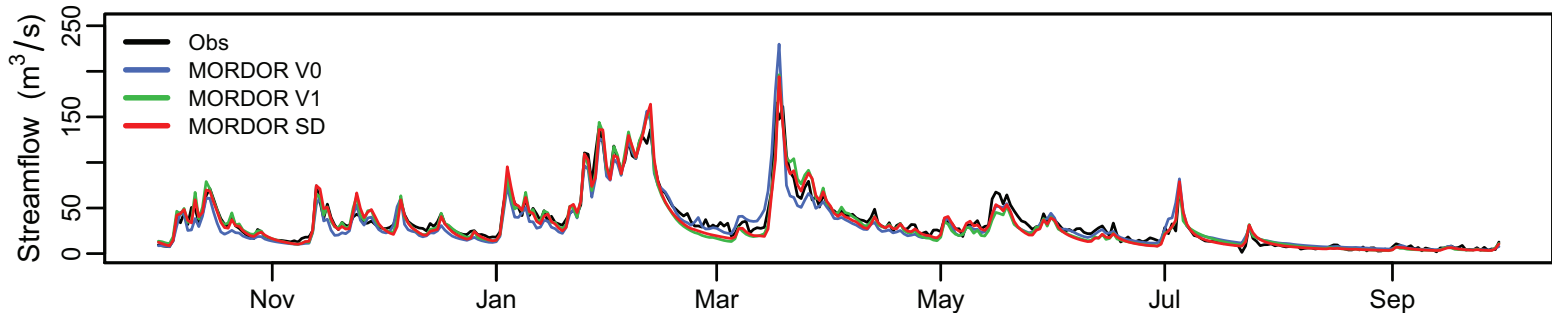

Year 1989

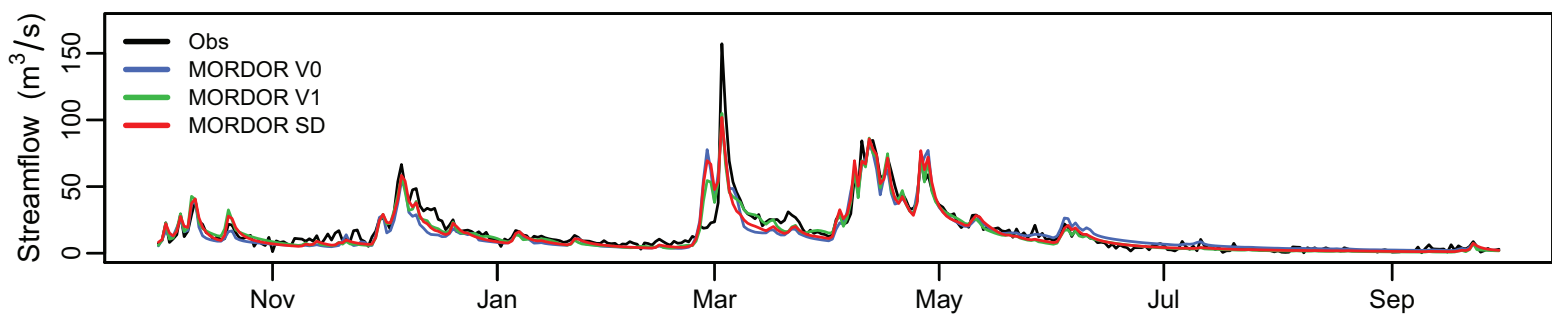

Year 1990

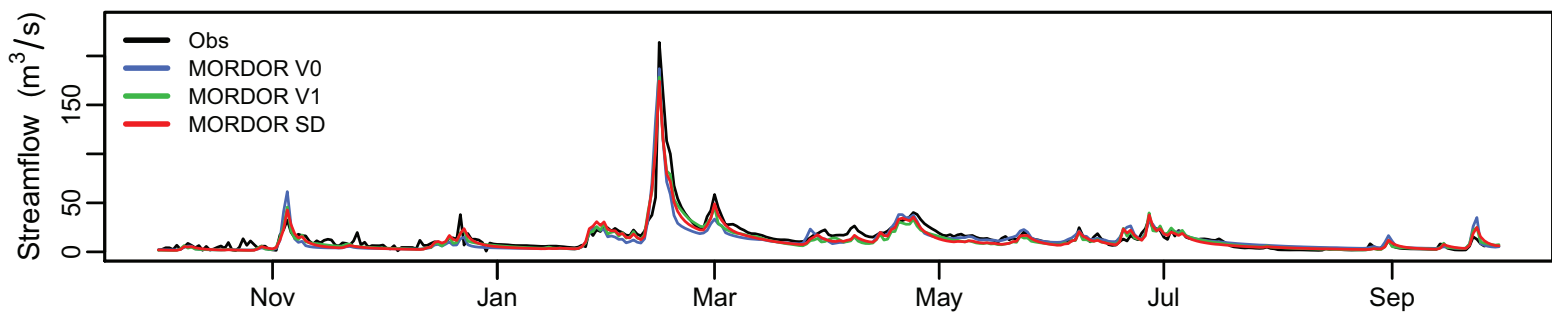

Year 1991

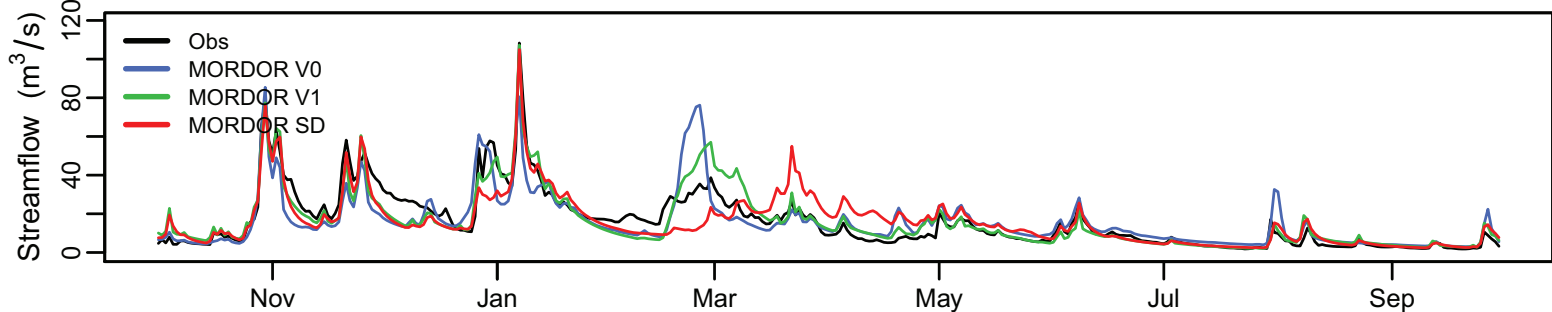



# Dordogne@Bort

Year 1992

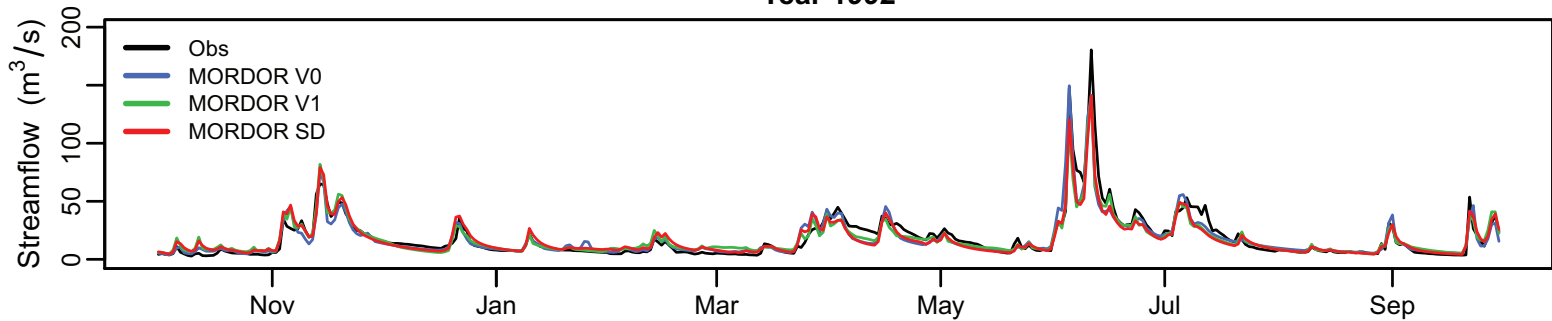

Year 1993

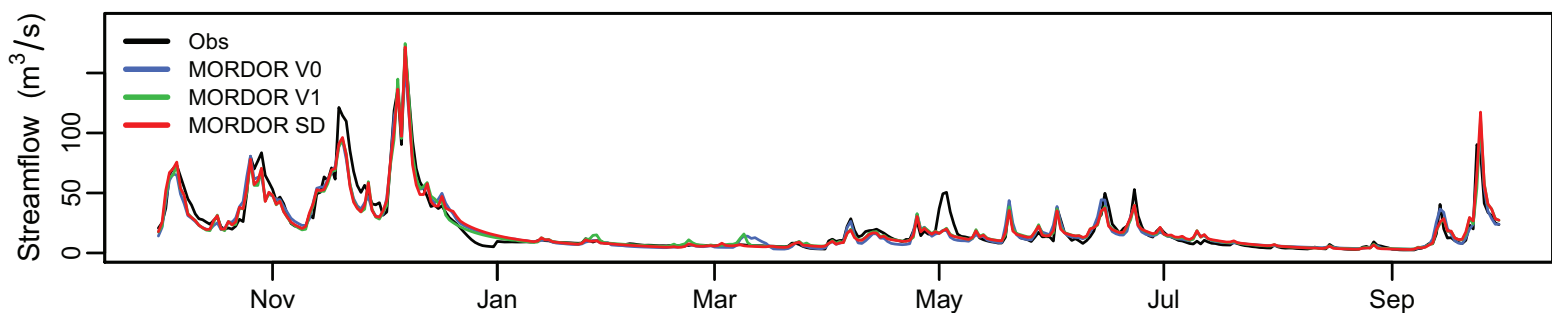

Year 1994

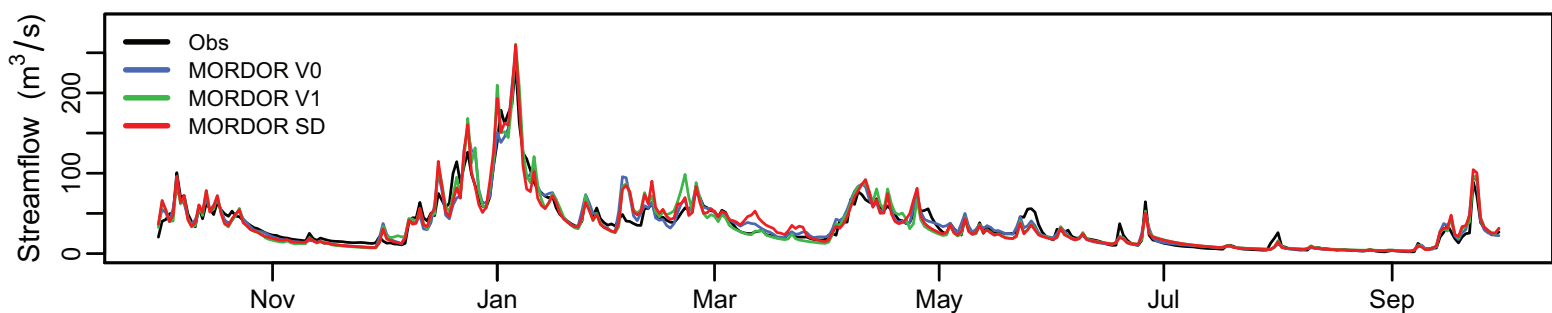

Year 1995

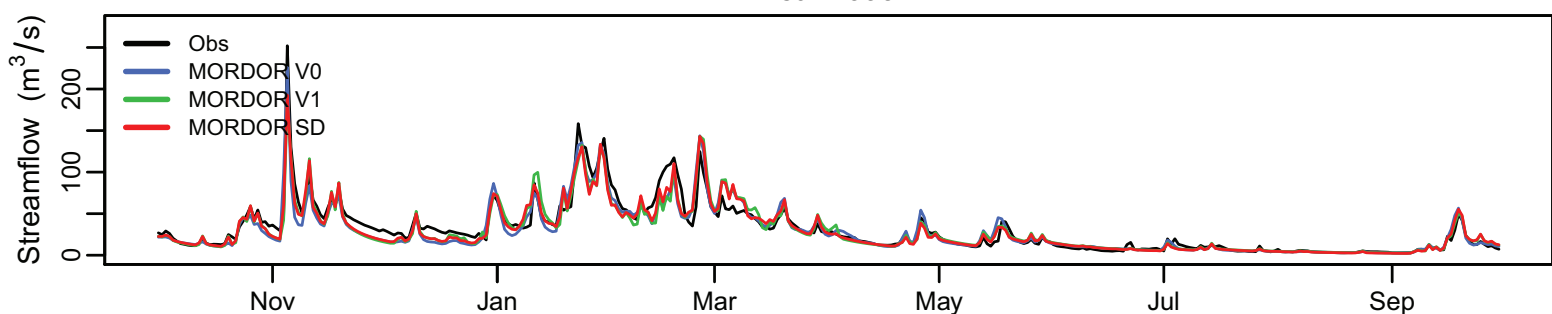

Year 1996

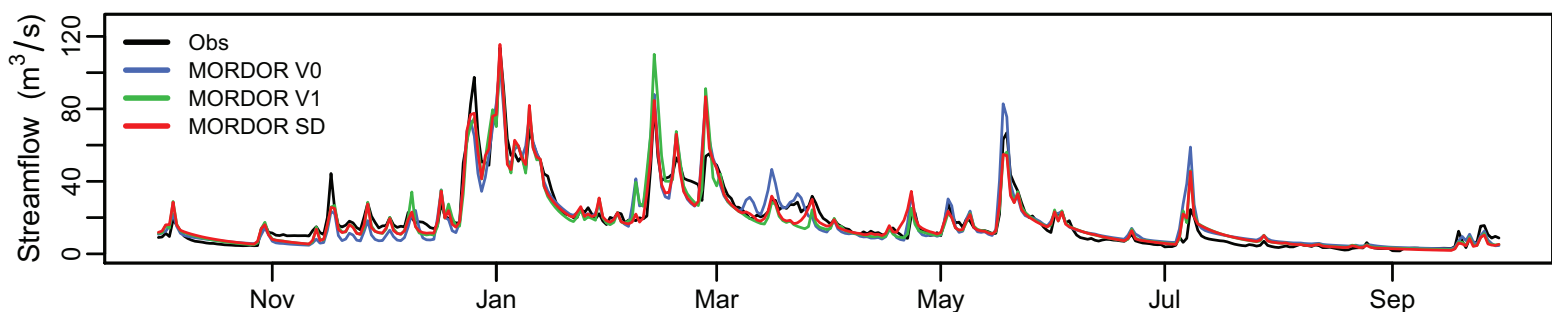

Year 1997

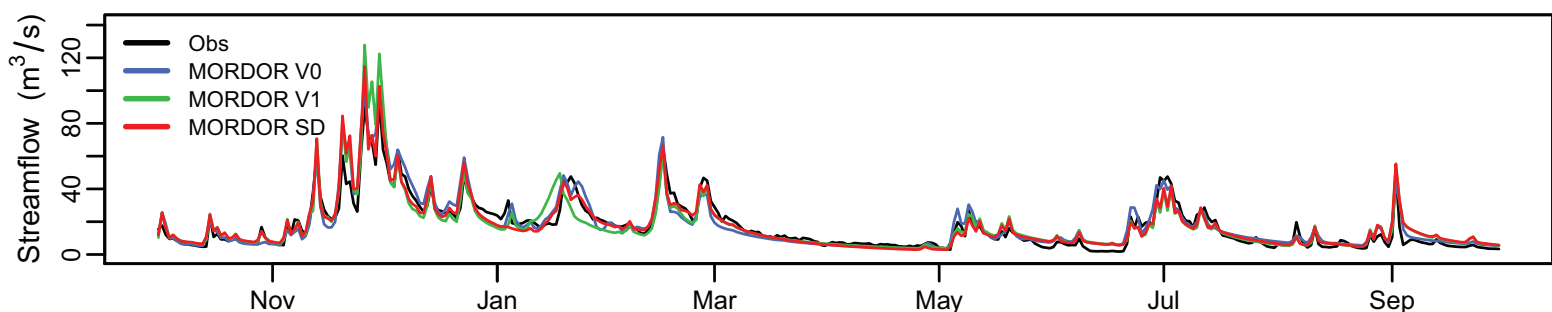

# Dordogne@Bort

Year 1998

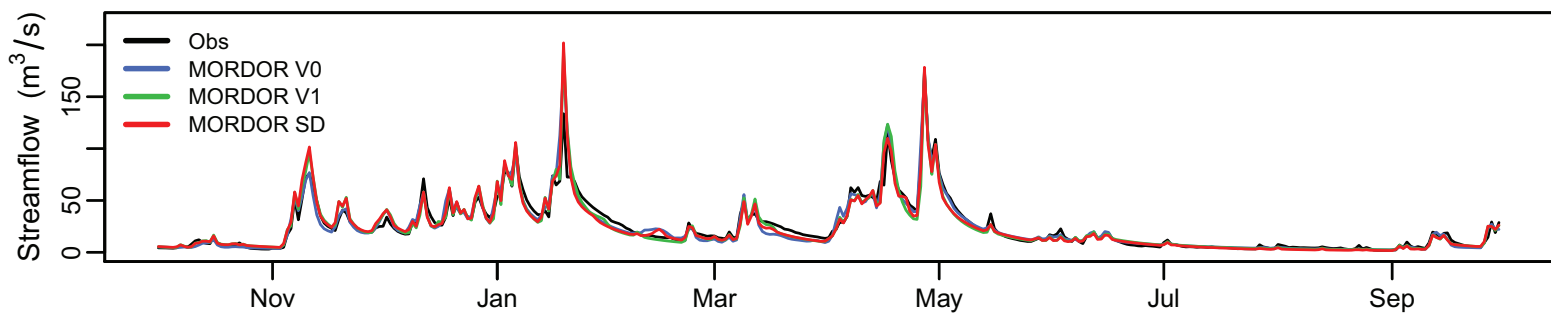

Year 1999

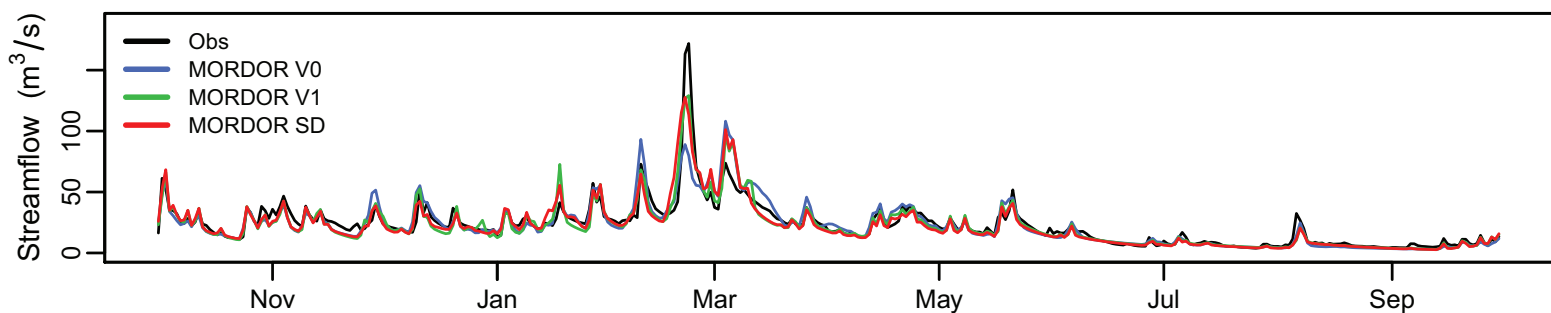

Year 2000

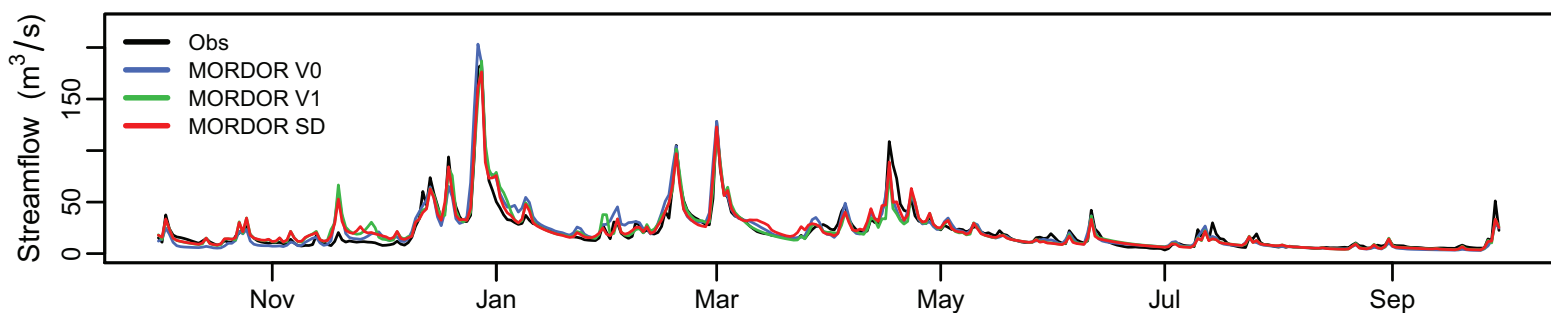

Year 2001

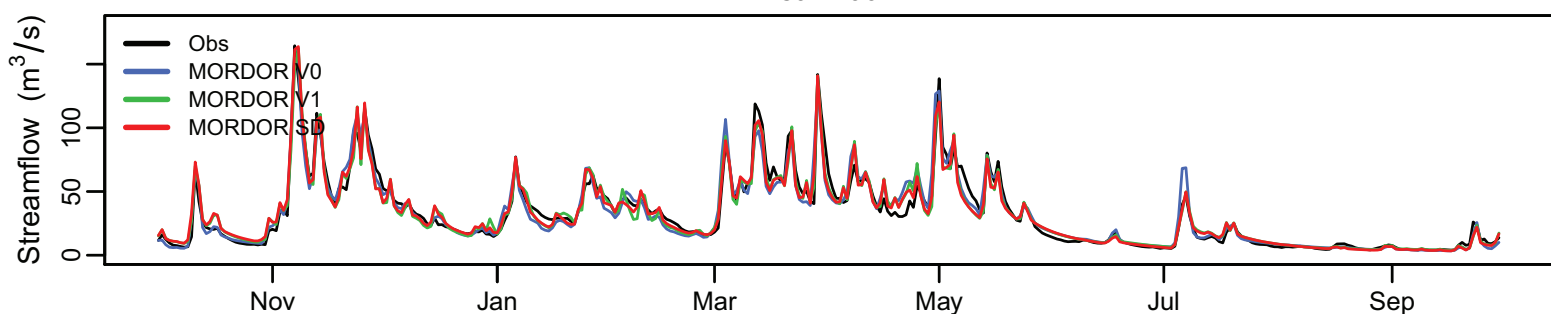

Year 2002

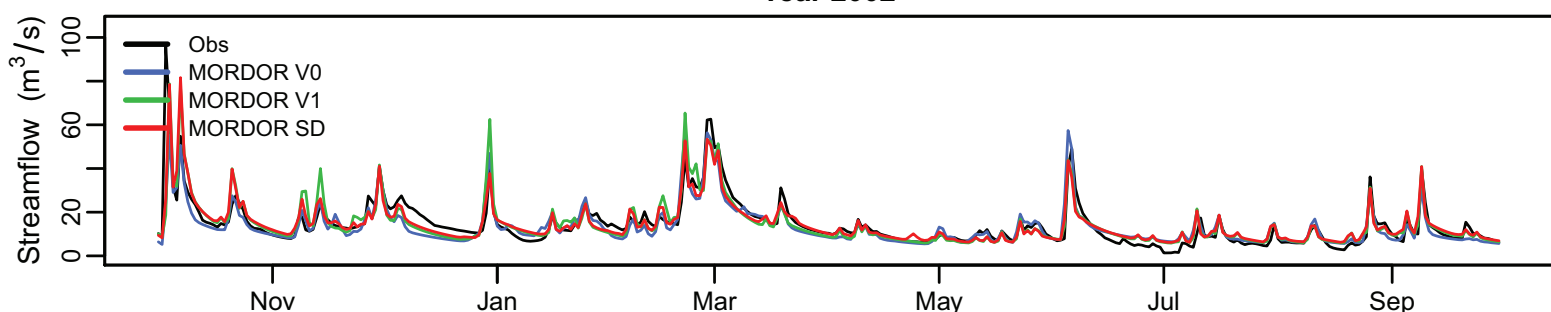

Year 2003

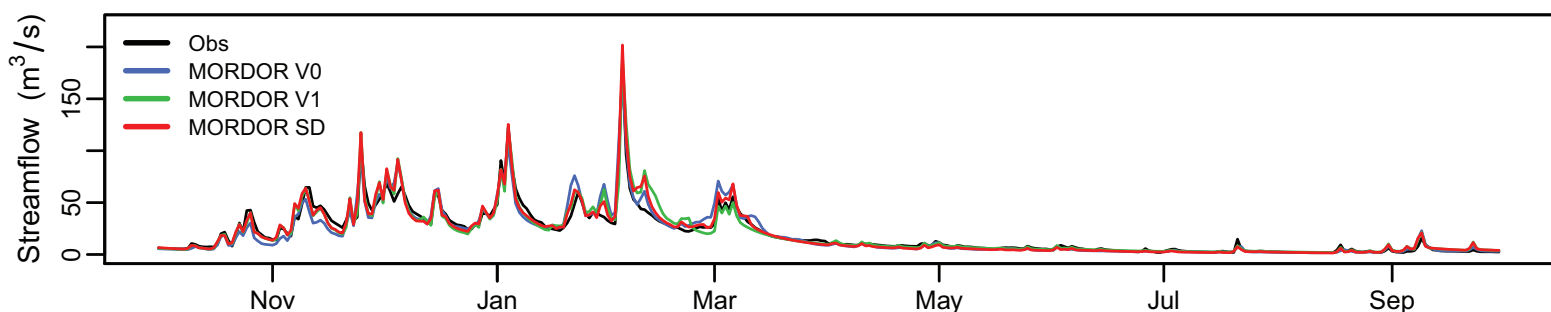

# Dordogne@Bort

Year 2004

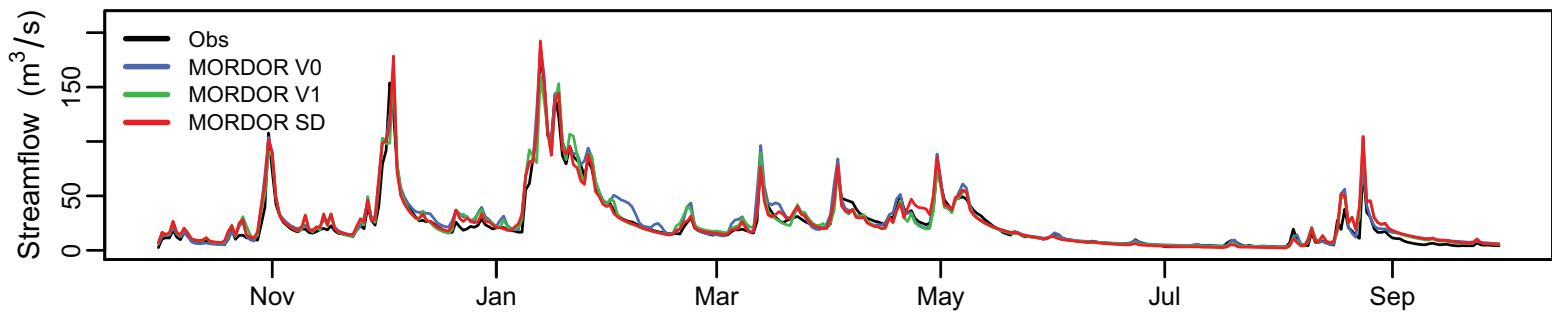

Year 2005

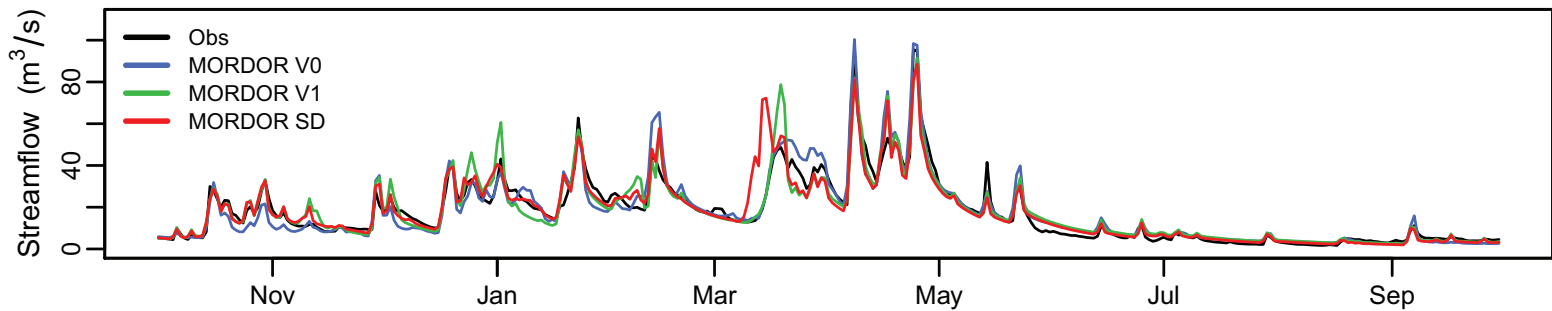

# Doubs@Brenet

Year 1963

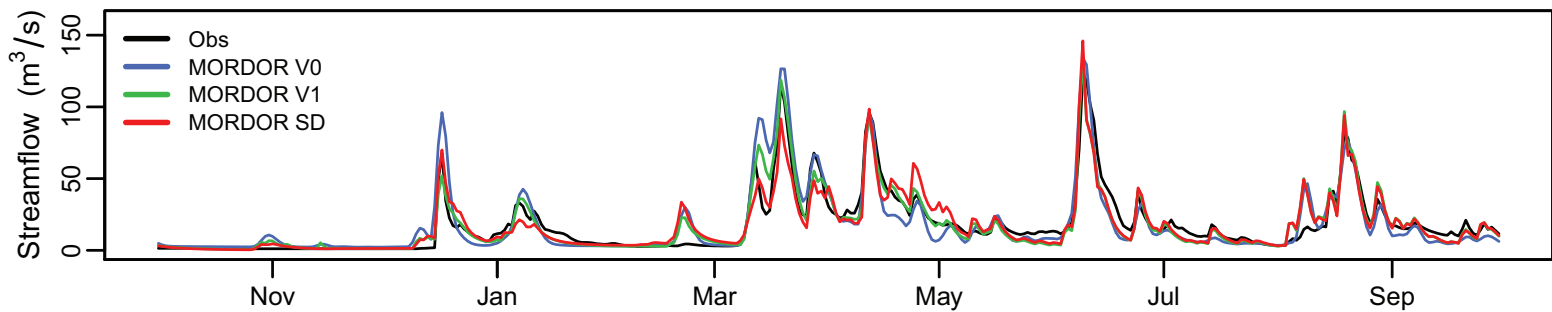

Year 1964

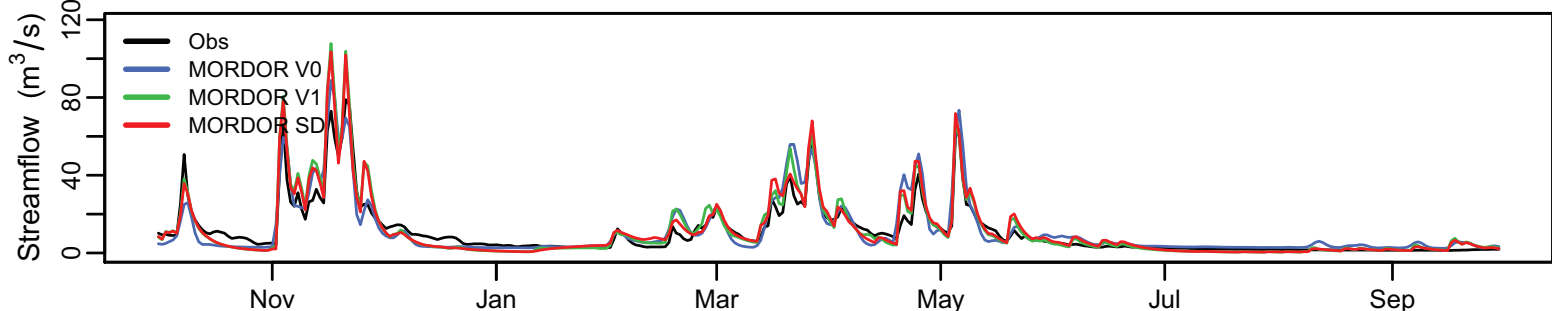

Year 1965

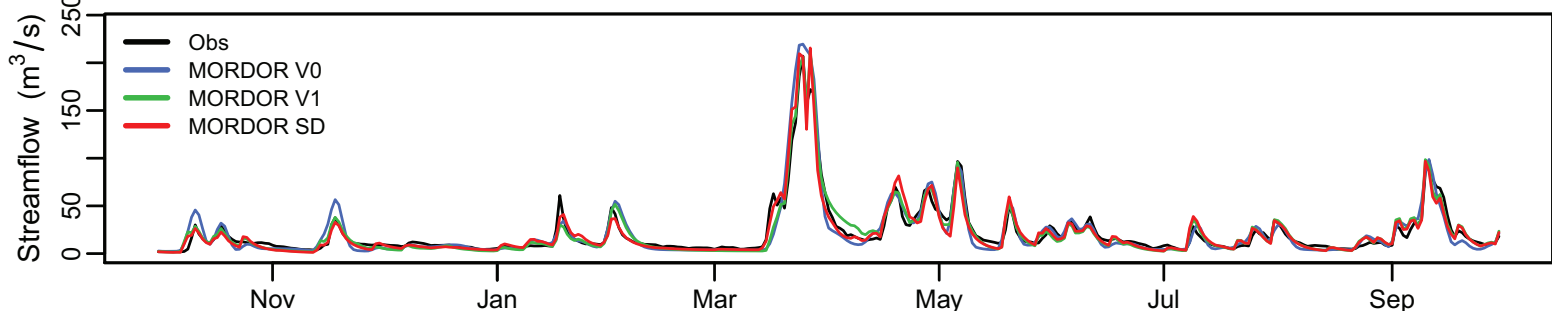

Year 1966

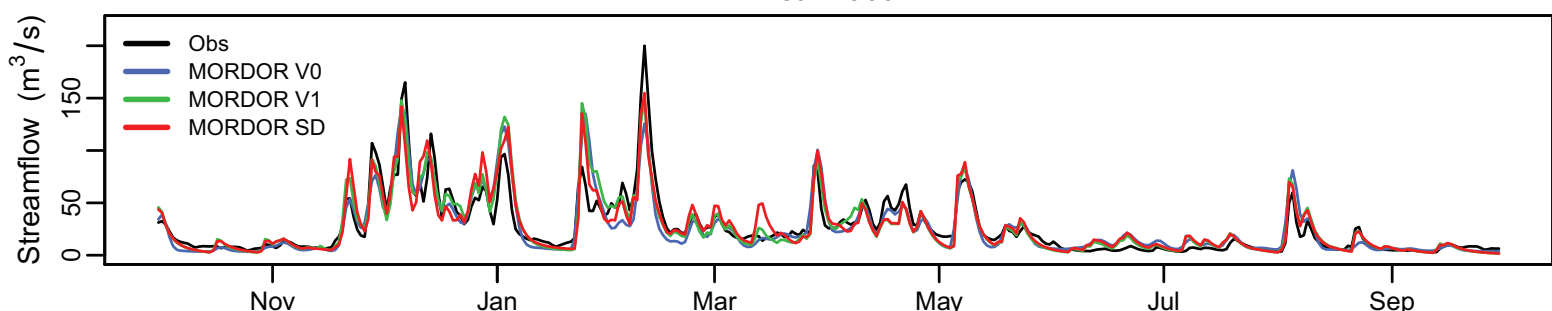

Year 1967

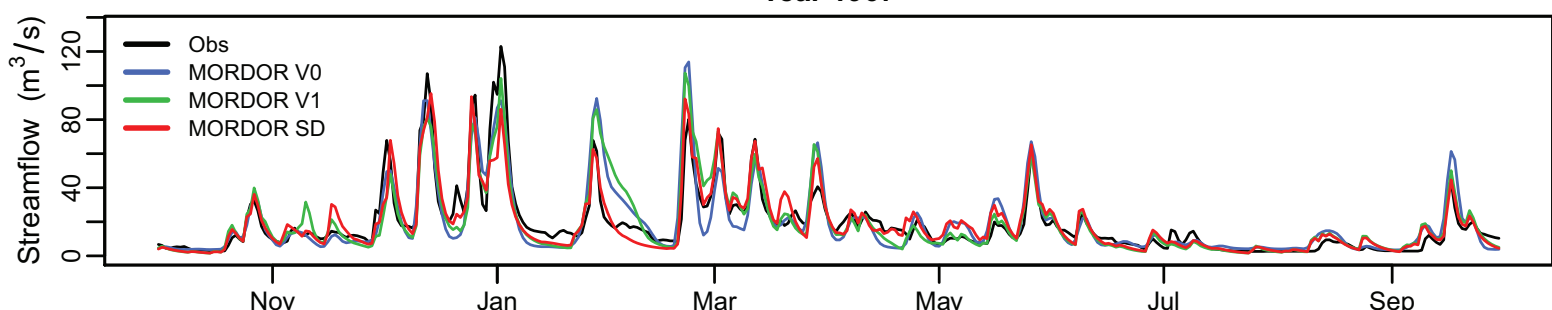

Year 1968

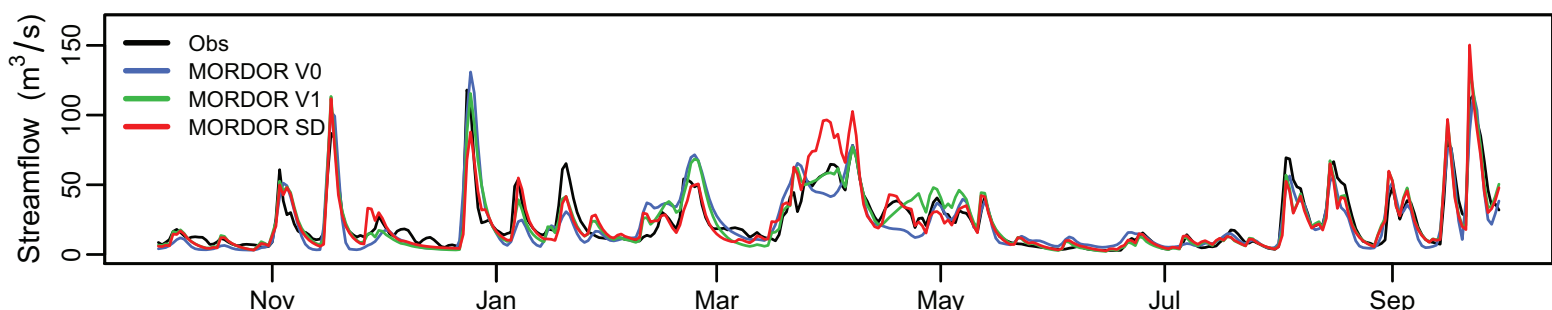

# Doubs@Brenet

Year 1969

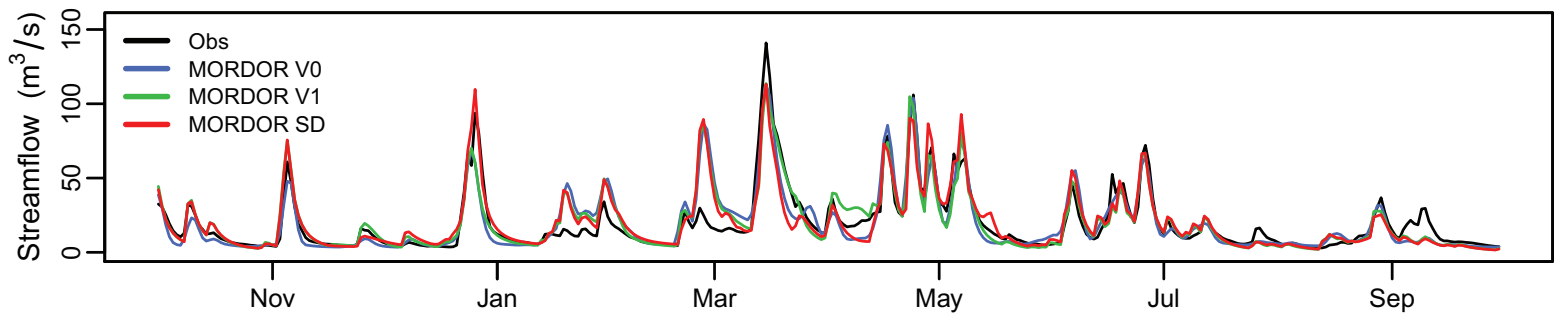

Year 1970

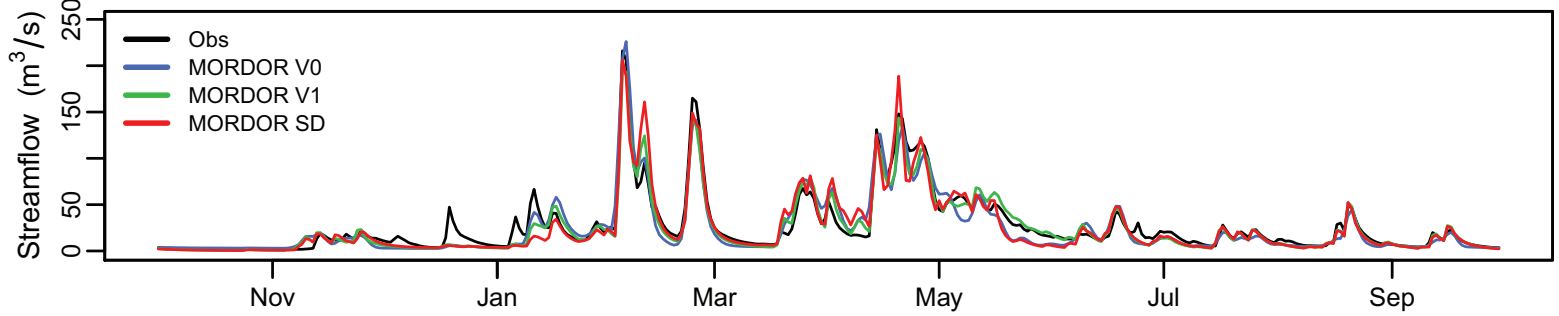

Year 1971

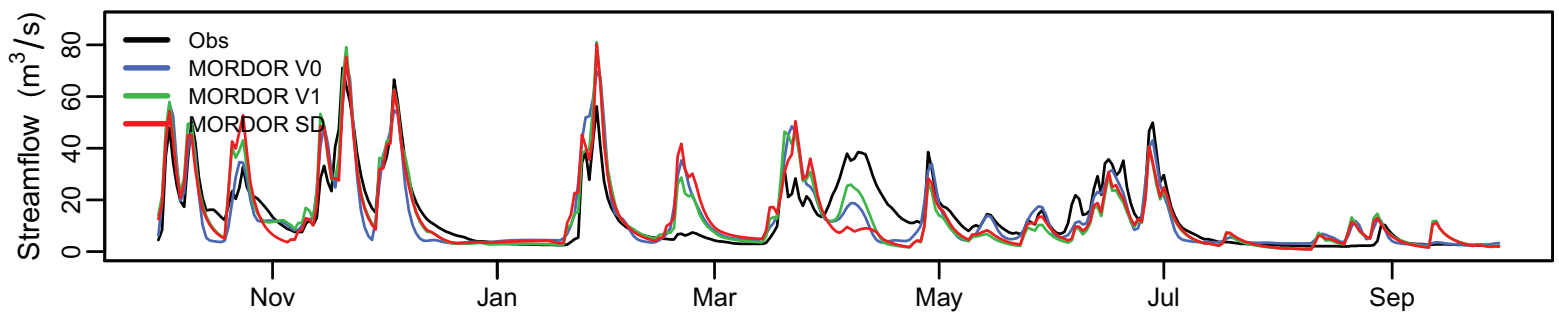

Year 1972

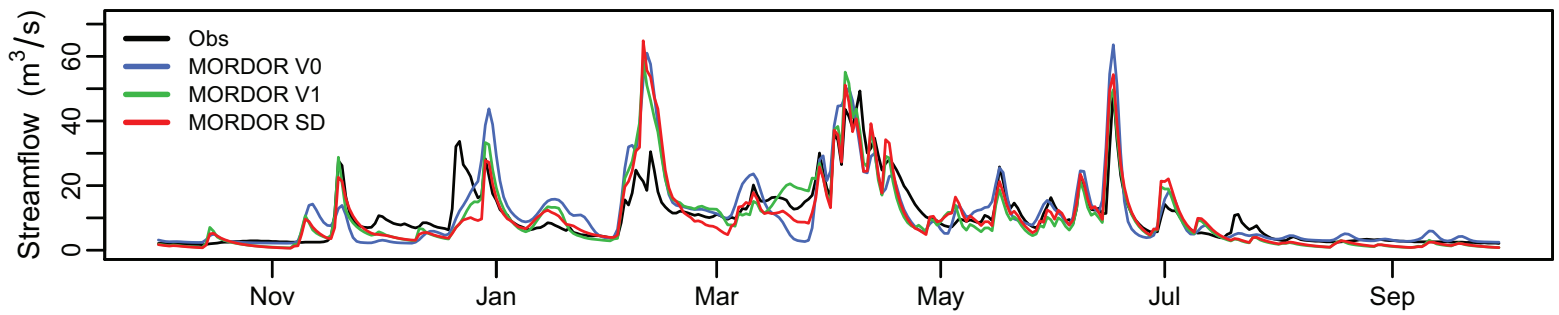

Year 1973

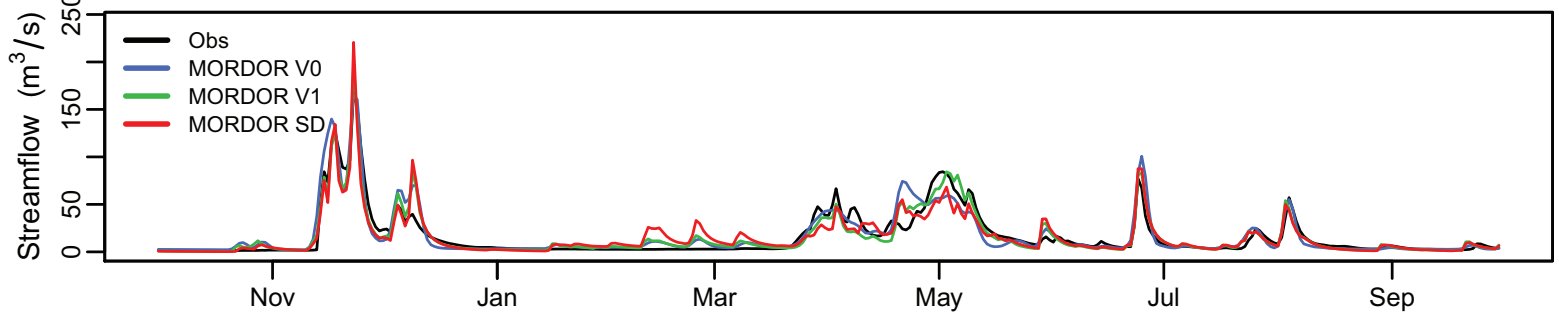

Year 1974

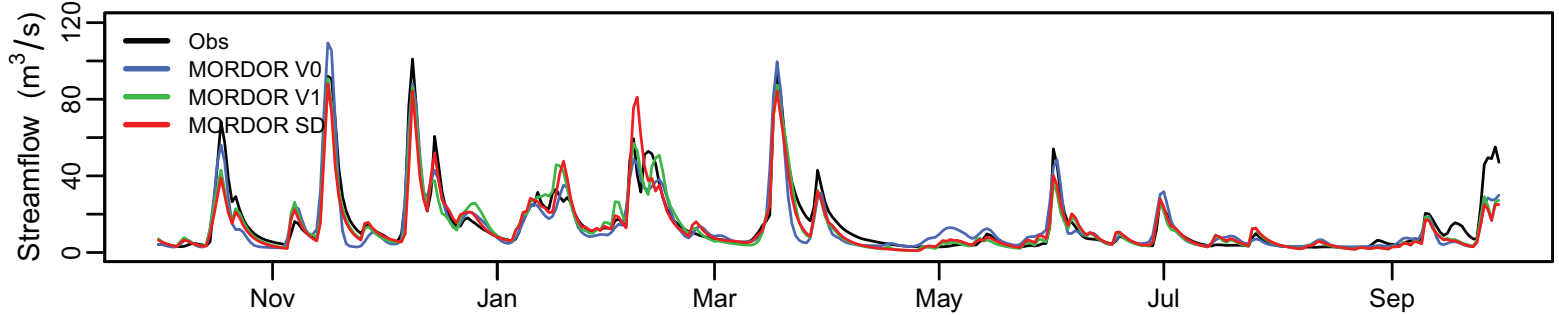

# Doubs@Brenet

Year 1975

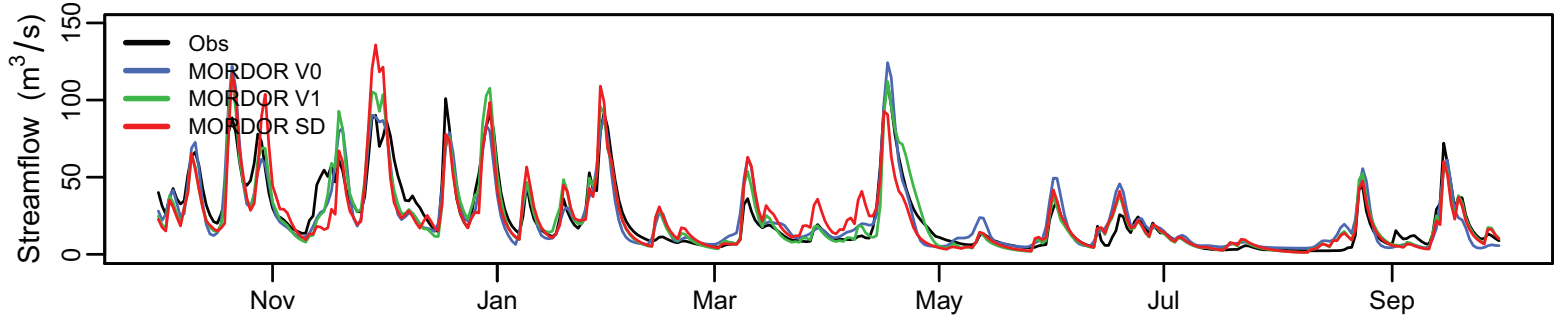

Year 1976

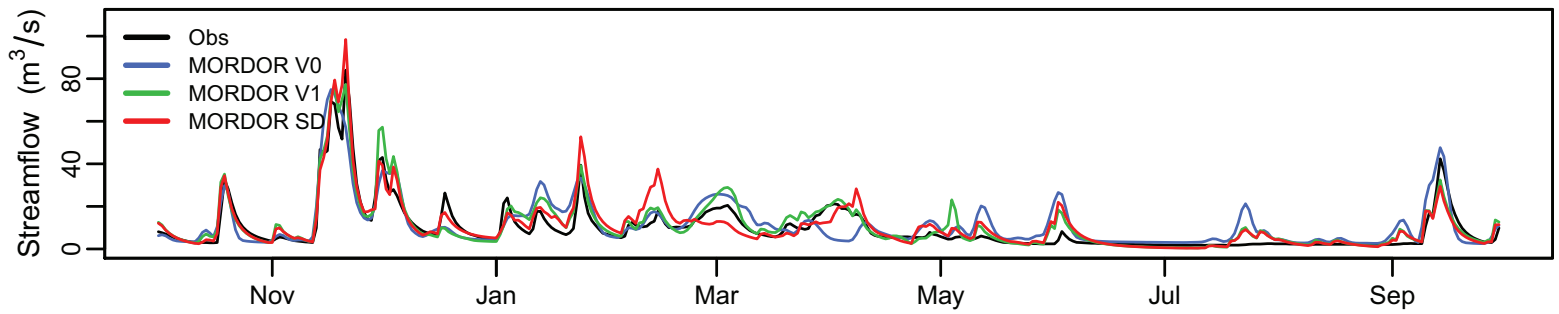

Year 1977

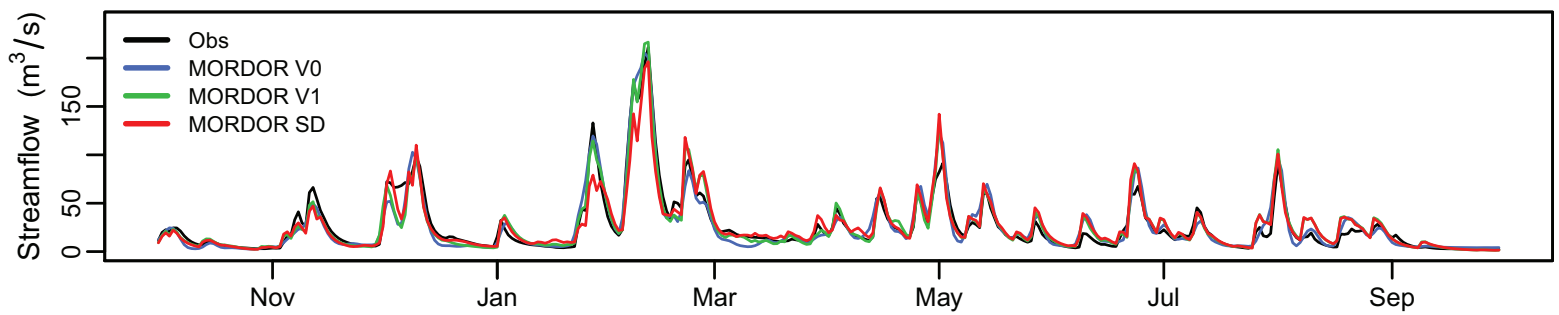

Year 1978

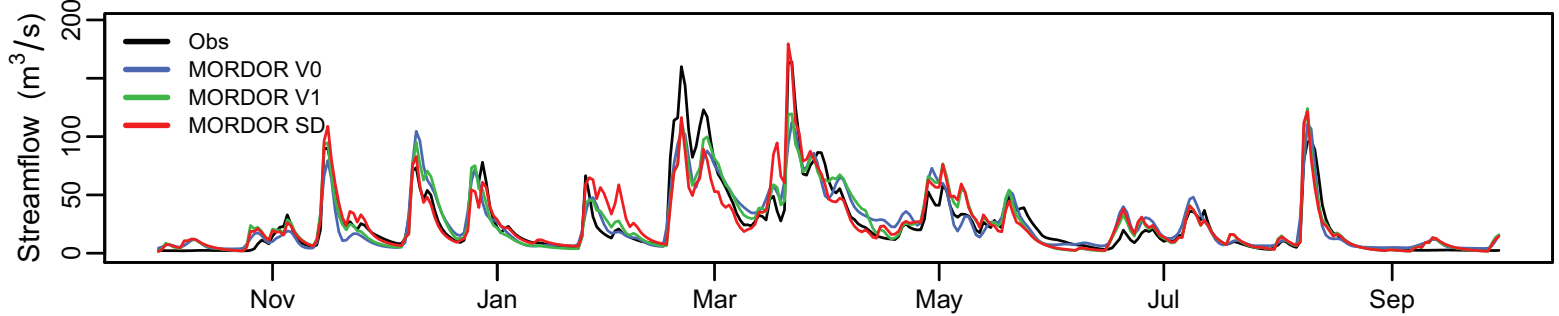

Year 1979

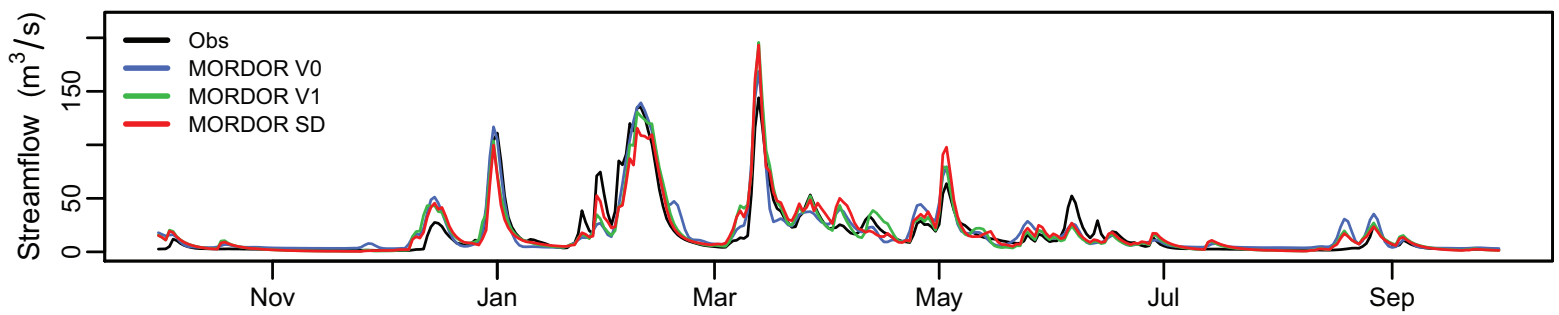

Year 1980

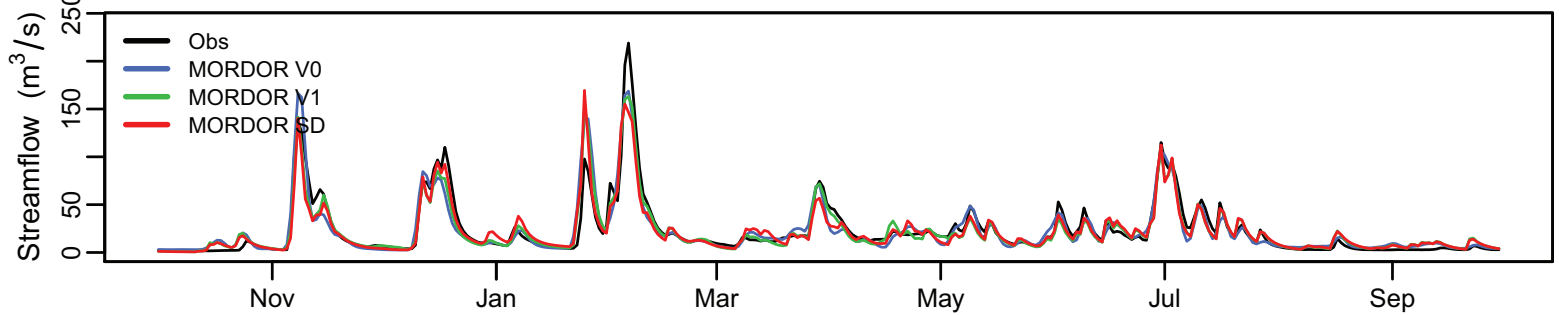

# Doubs@Brenet

Year 1981

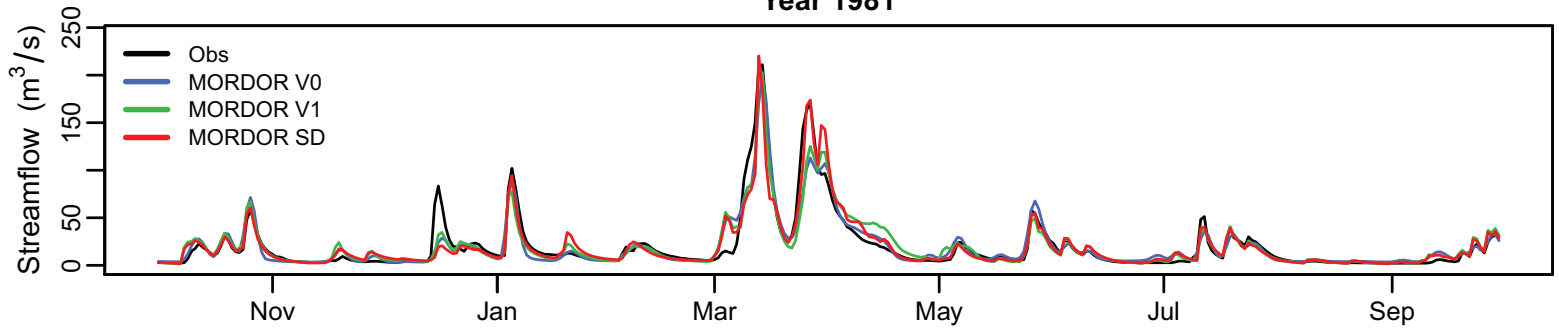

Year 1982

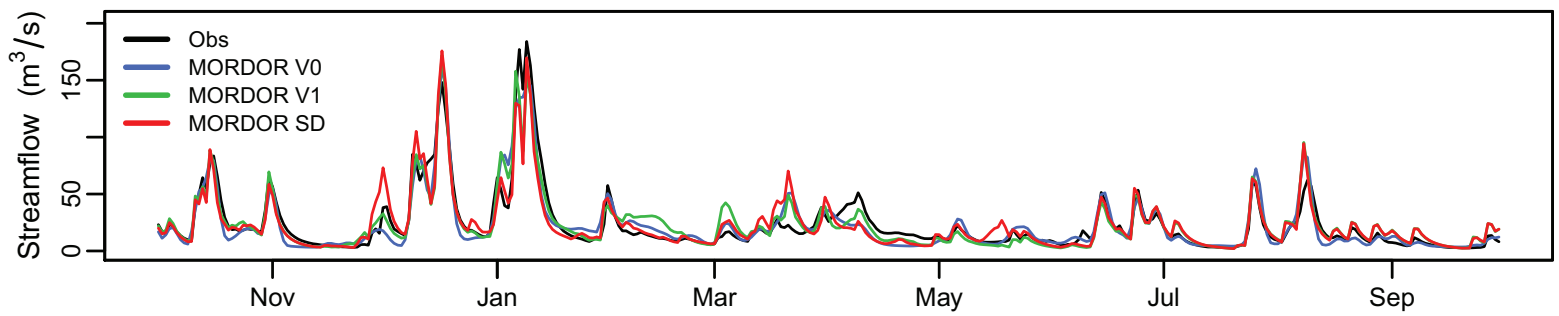

Year 1983

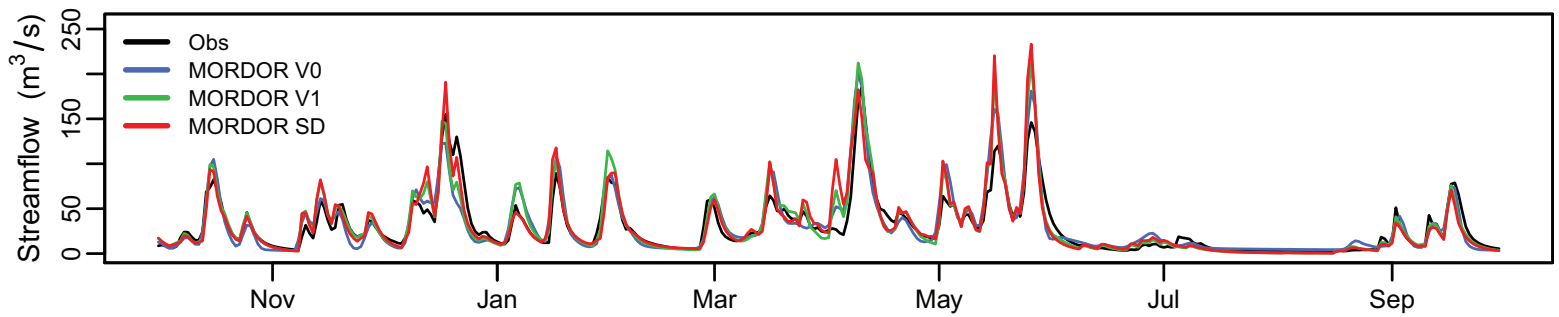

Year 1984

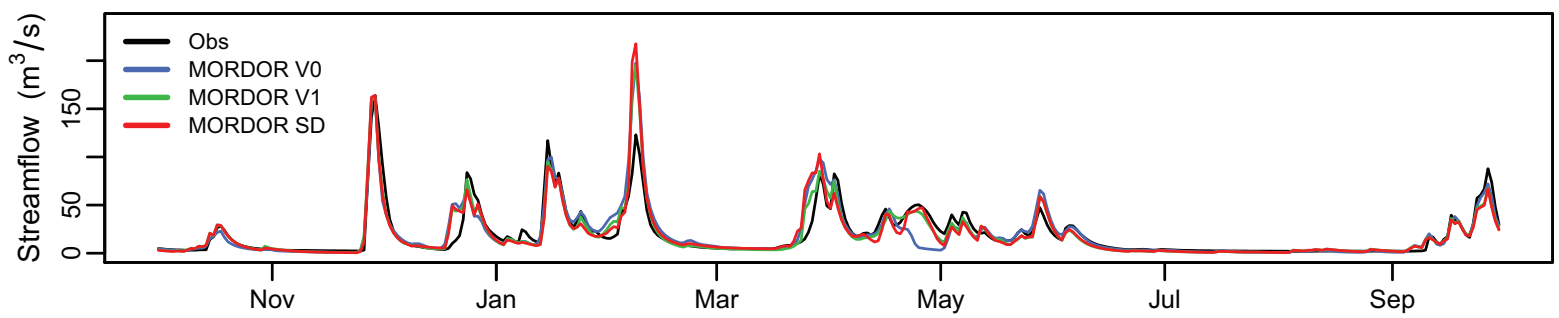

Year 1985

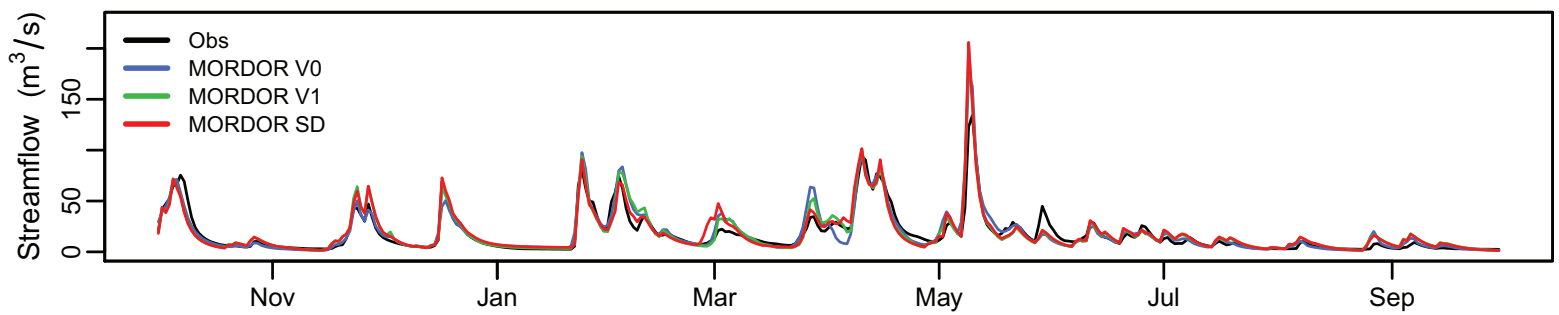

Year 1986

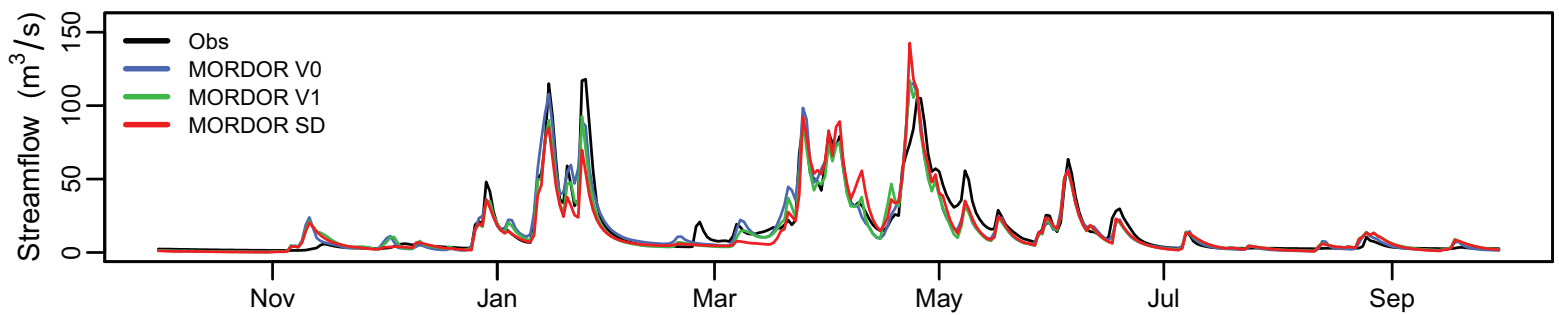

# Doubs@Brenet

Year 1987

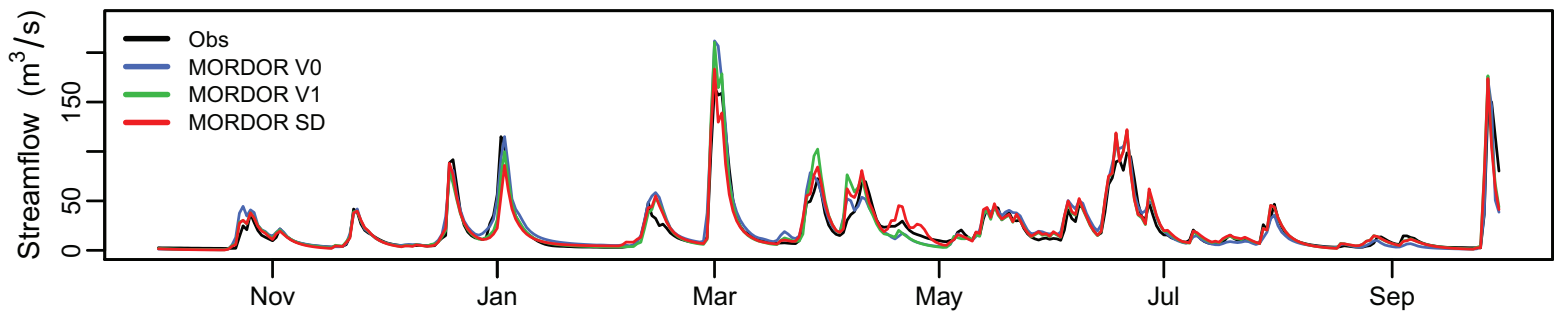

Year 1988

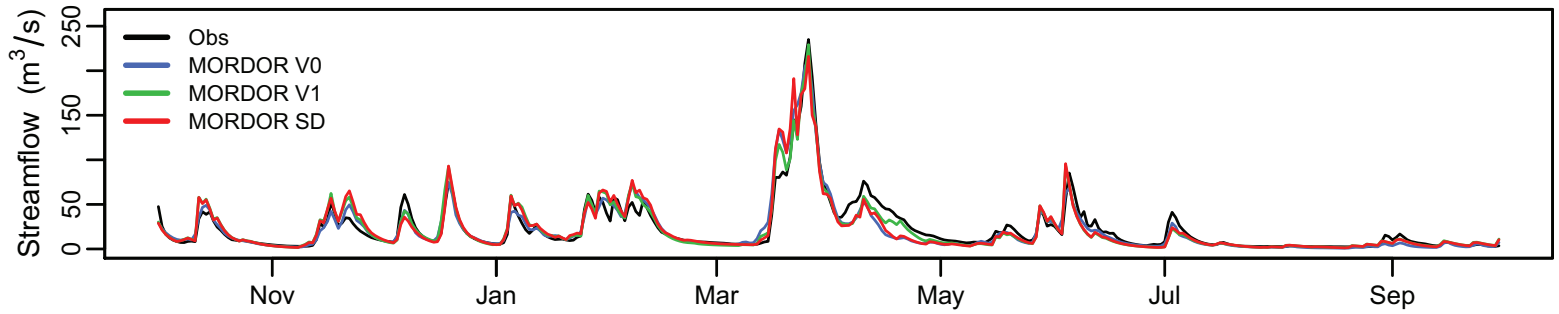

Year 1989

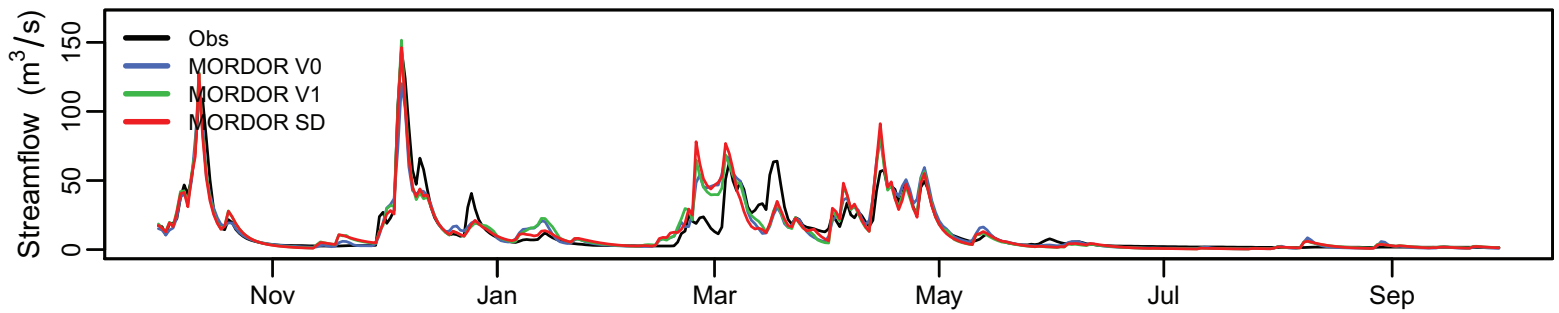

Year 1990

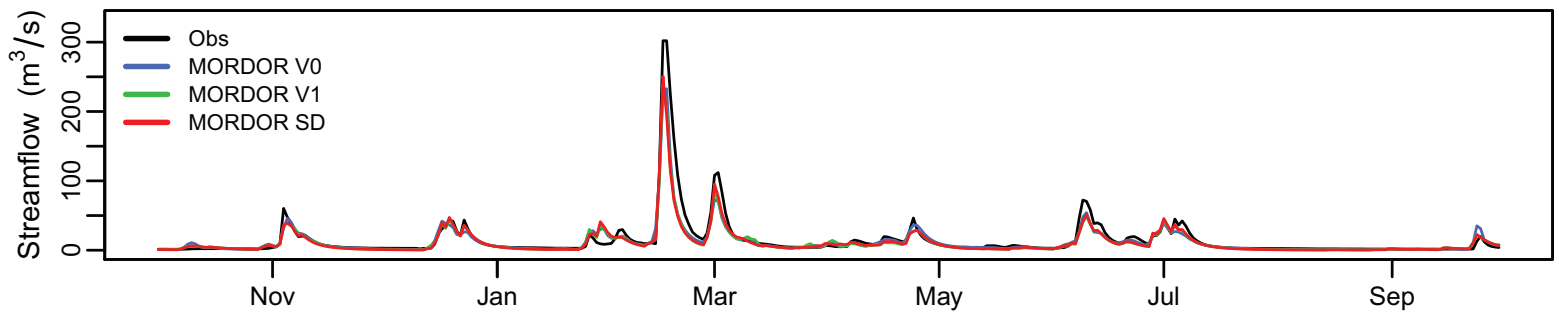

Year 1991

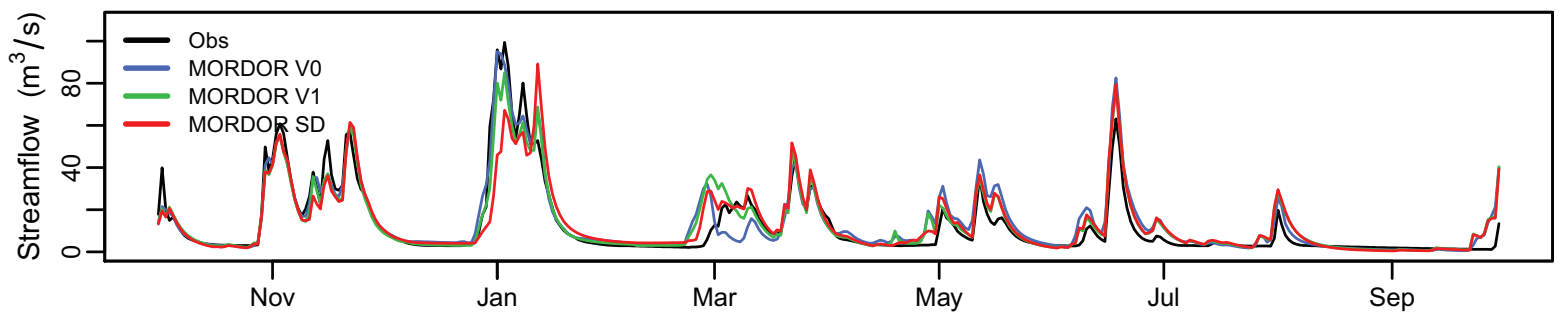

Year 1992

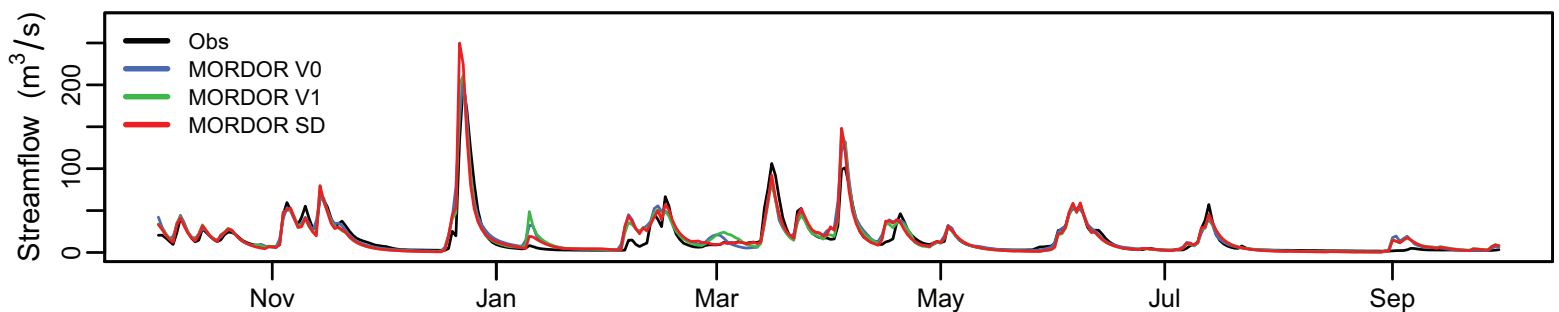



# Doubs@Brenet

Year 1993

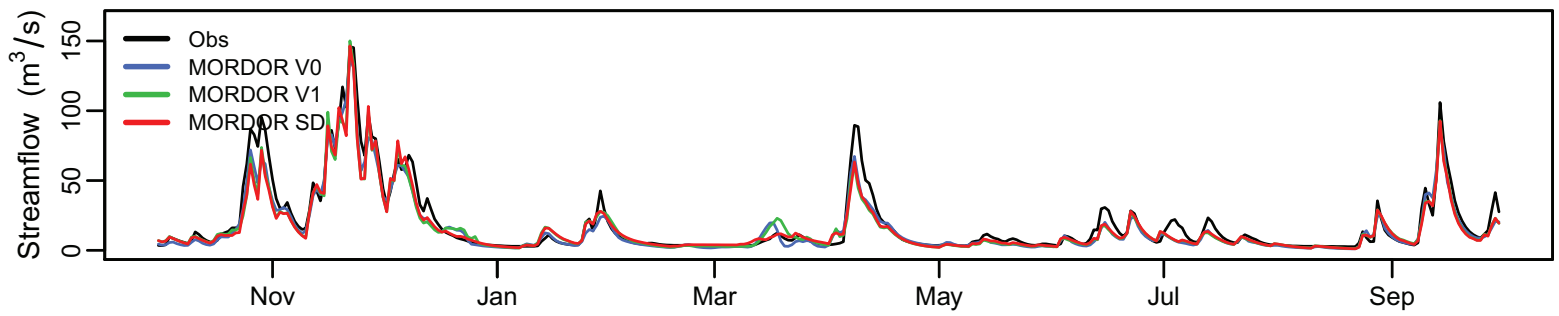

Year 1994

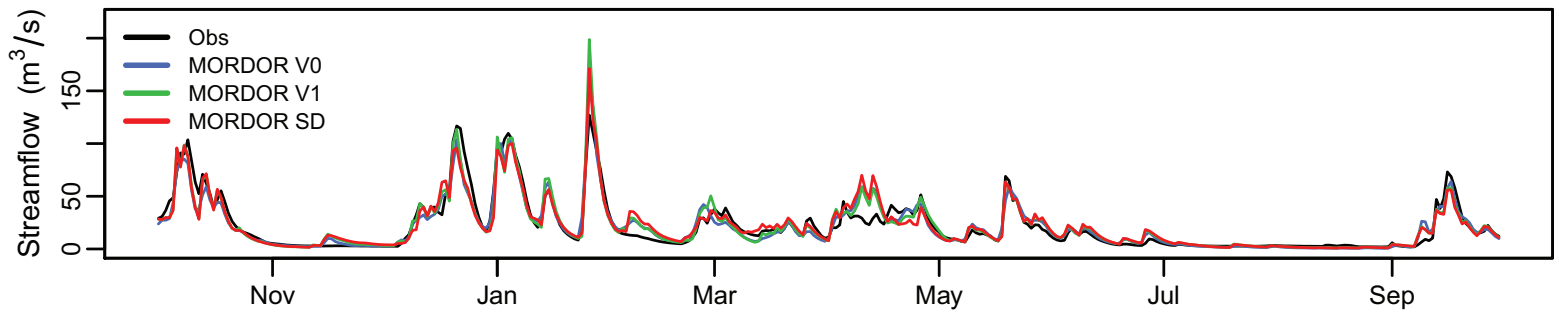

Year 1995

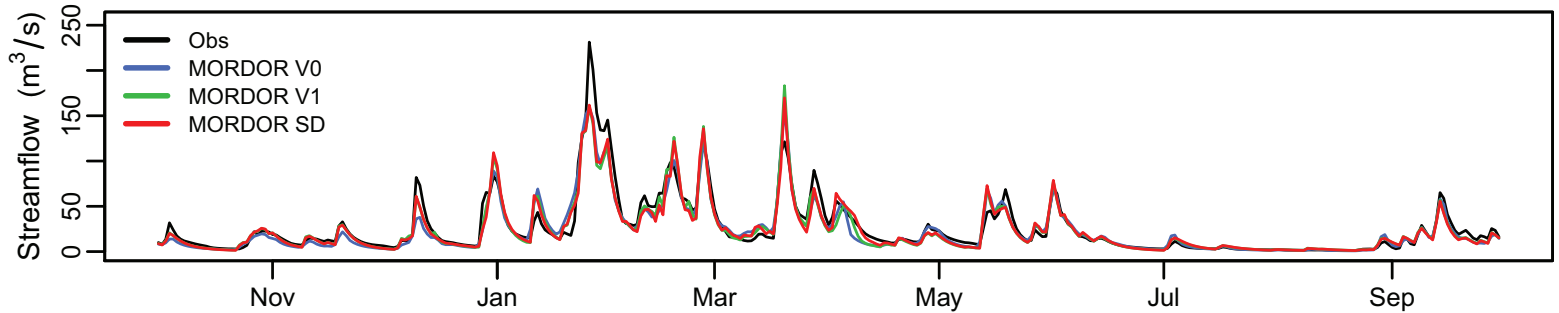

Year 1996

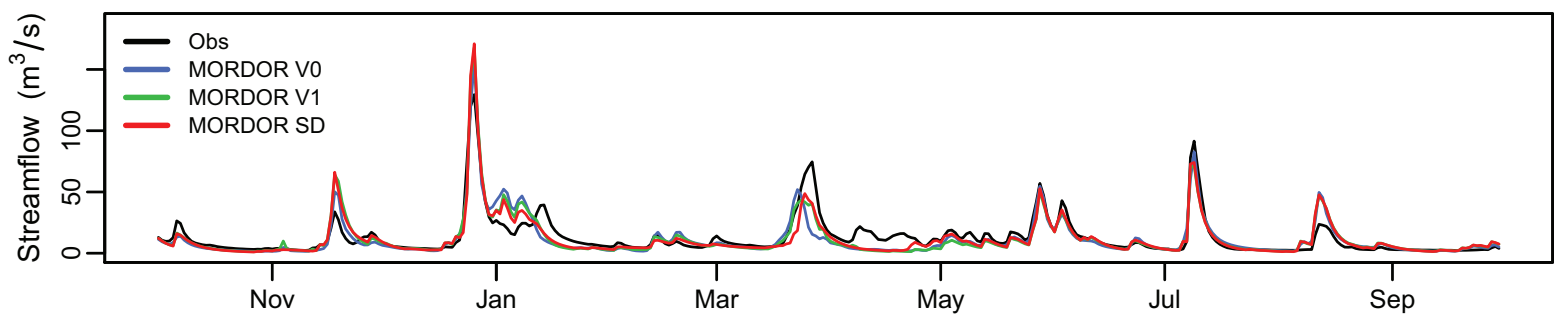

Year 1997

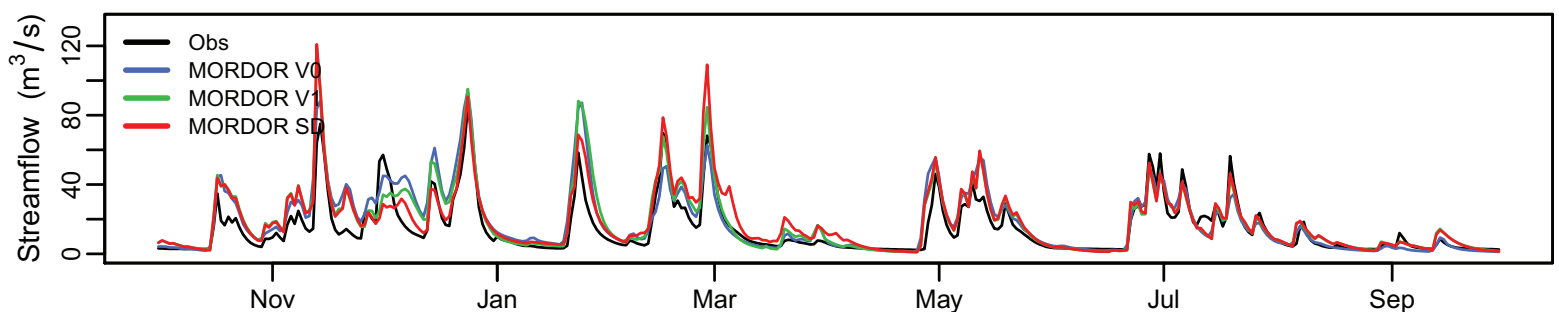

Year 1998

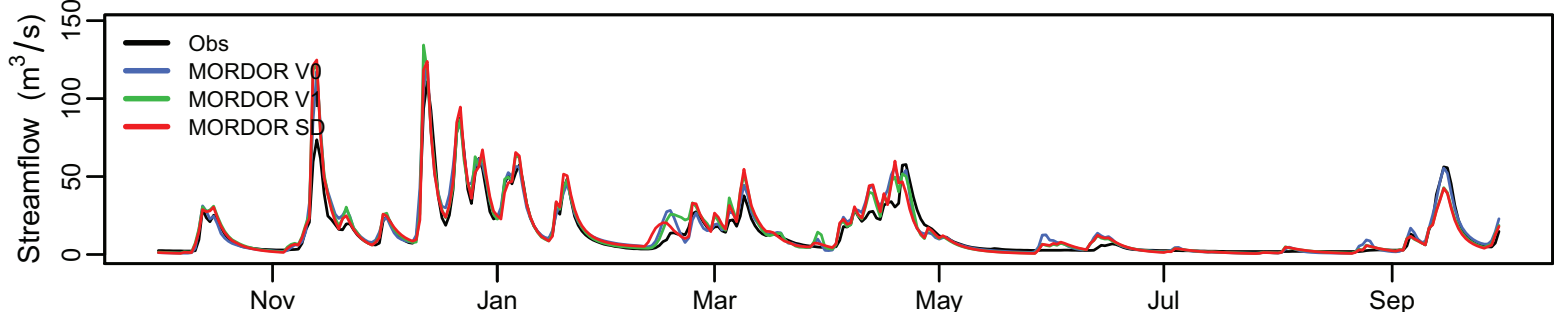

# Doubs@Brenet

Year 1999

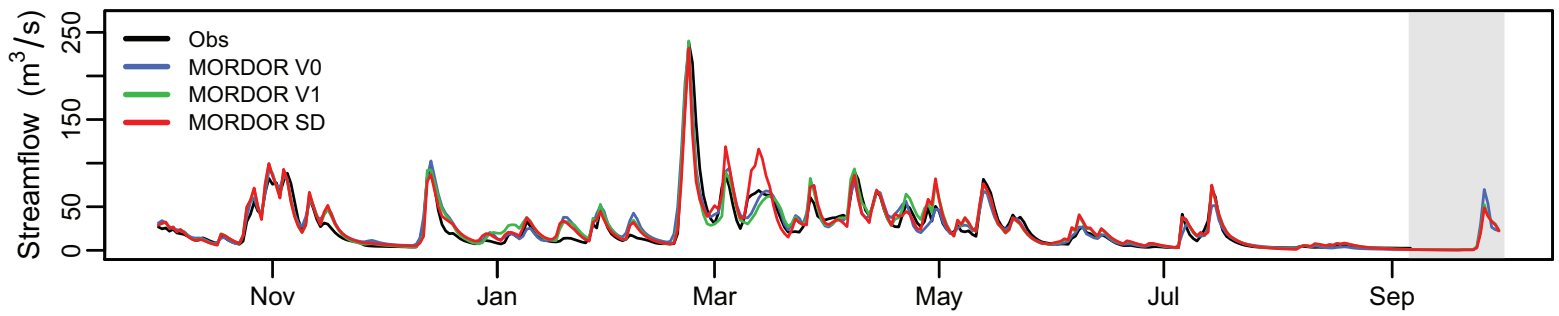

Year 2000

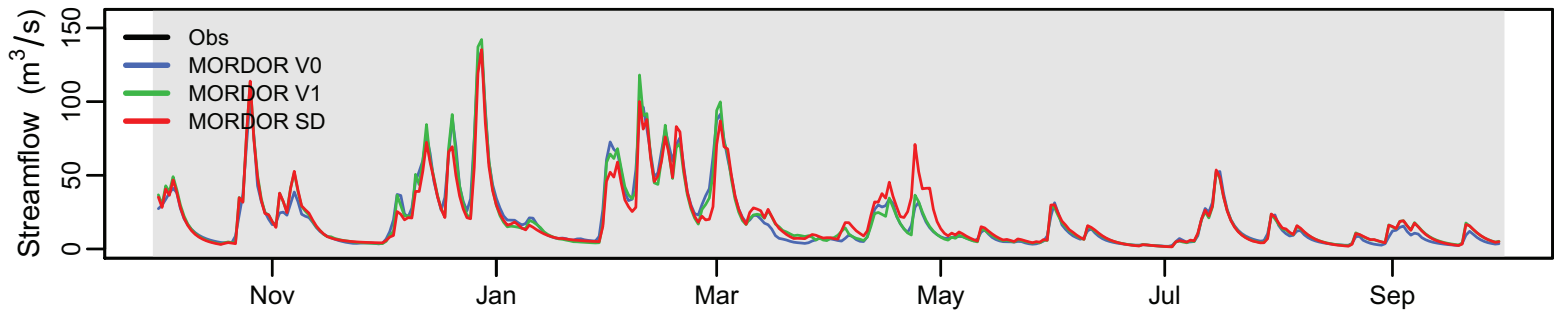

Year 2001

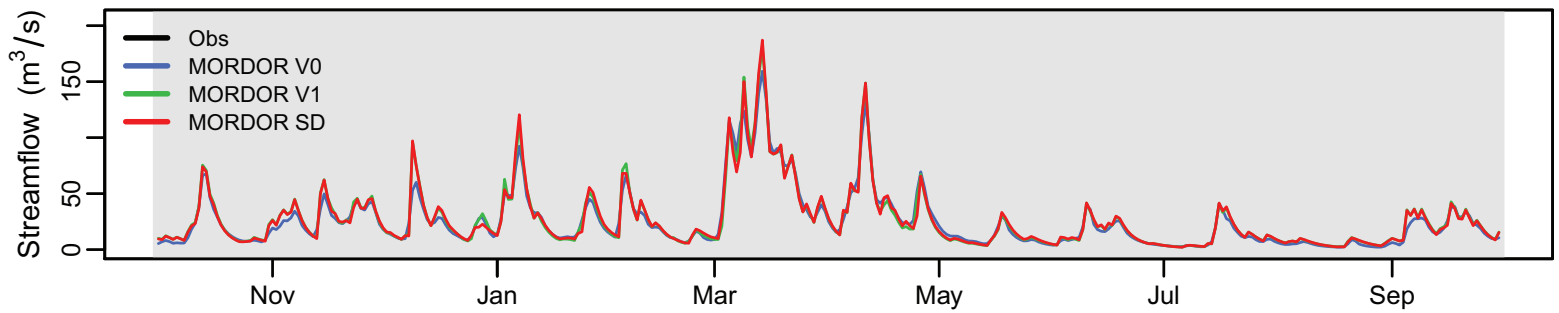

Year 2002

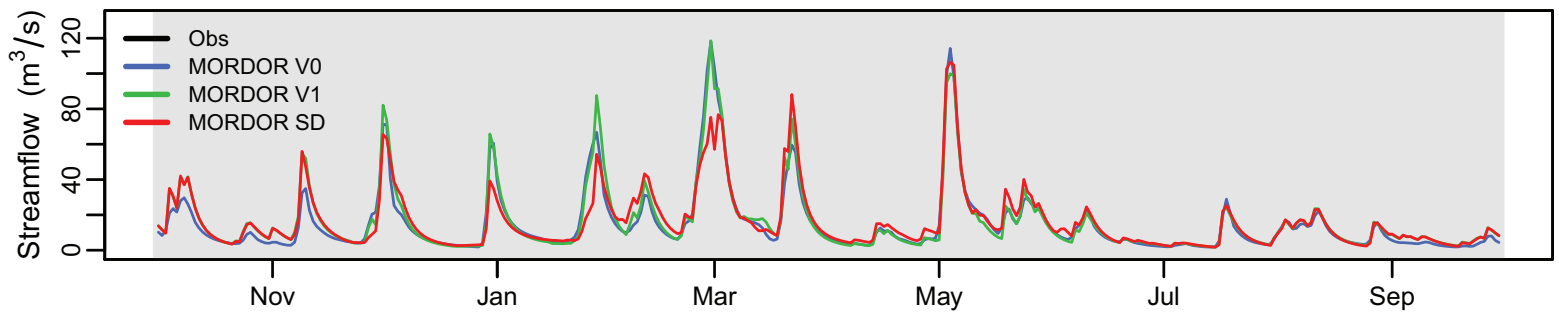

Year 2003

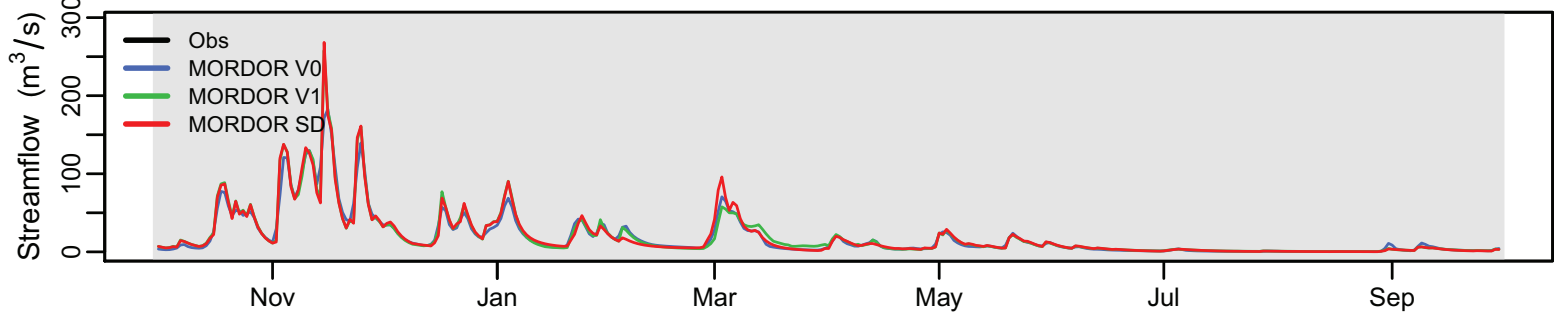

Year 2004

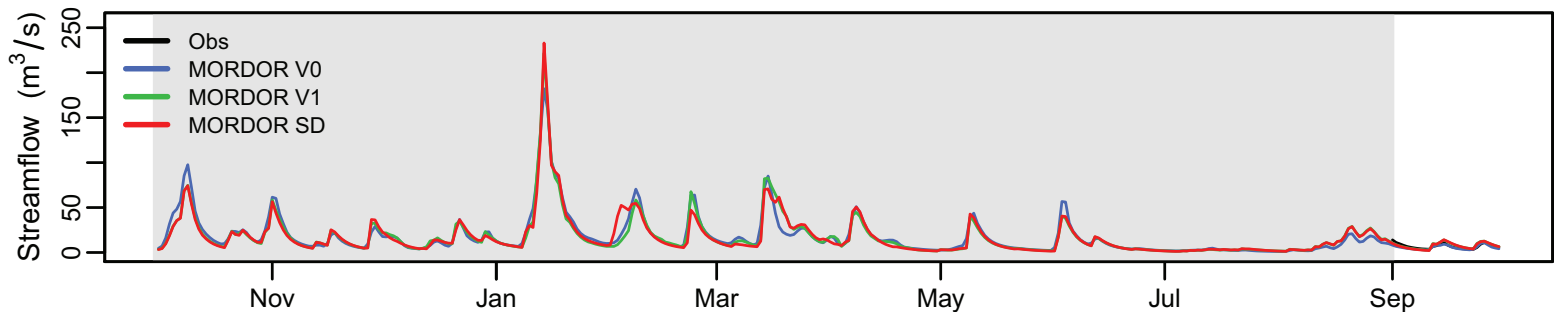

# Doubs@Neublans

Year 1968

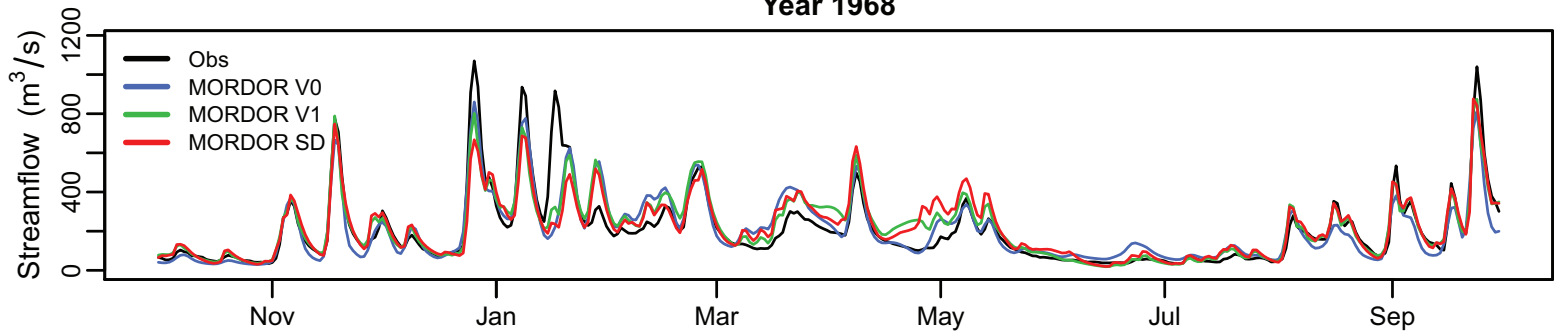

Year 1969

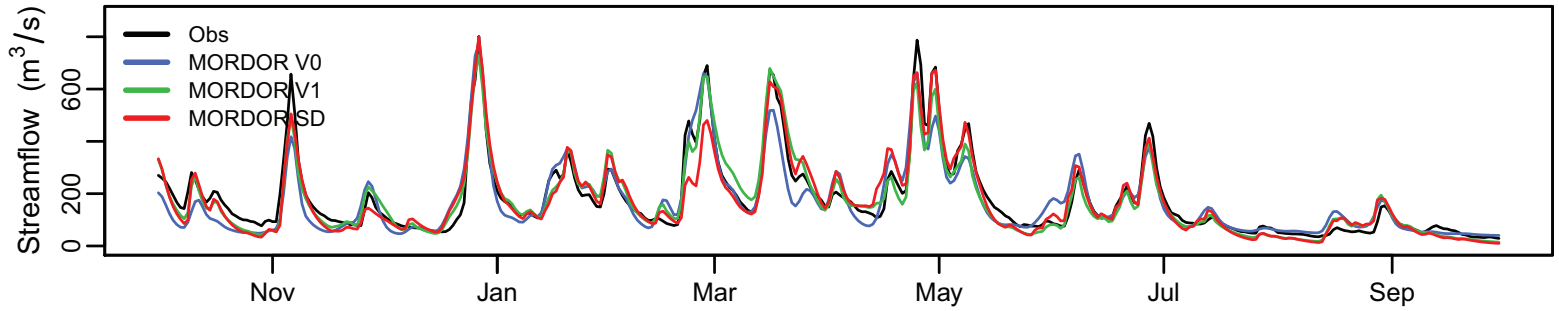

Year 1970

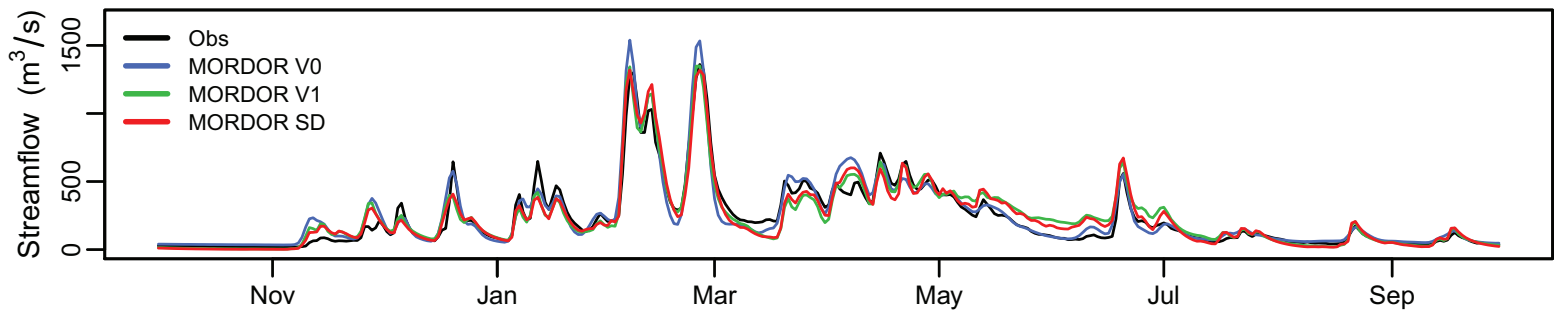

Year 1971

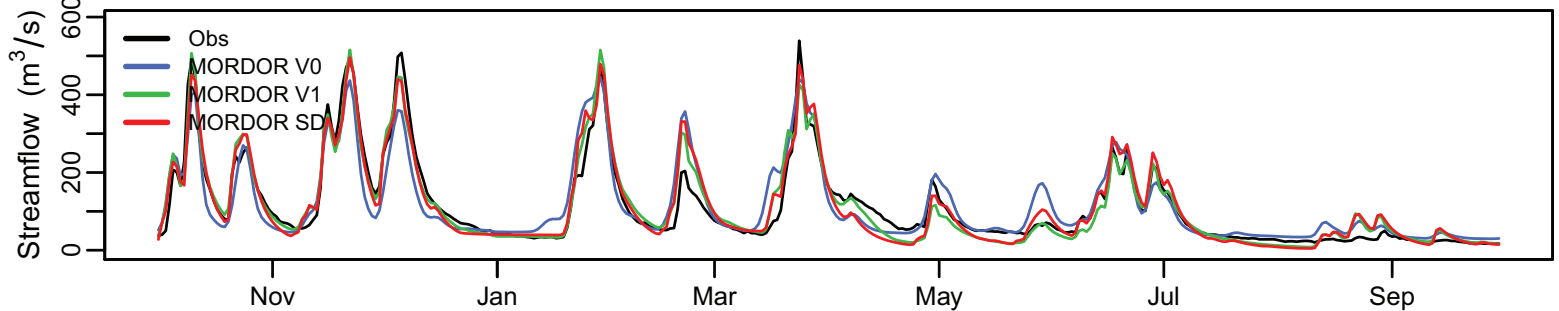

Year 1972

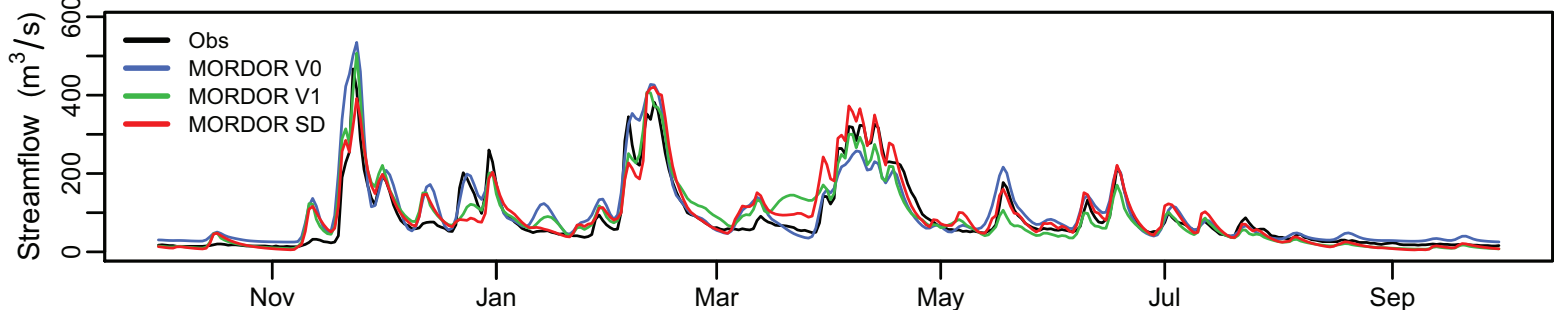

Year 1973

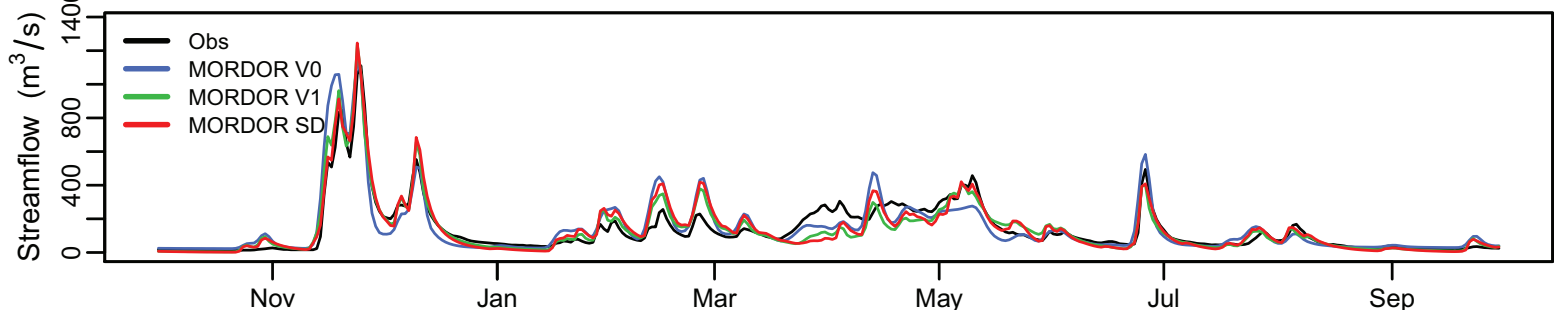

# Doubs@Neublans

Year 1974

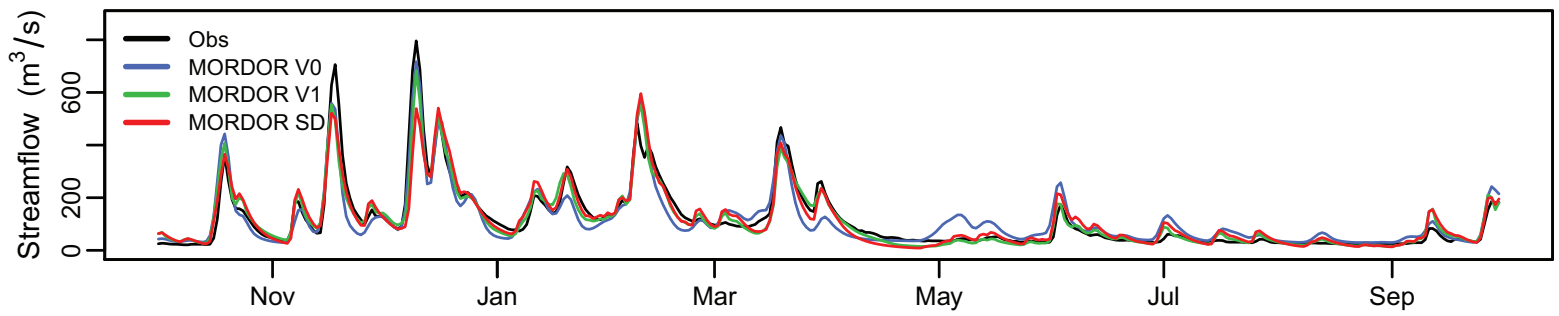

Year 1975

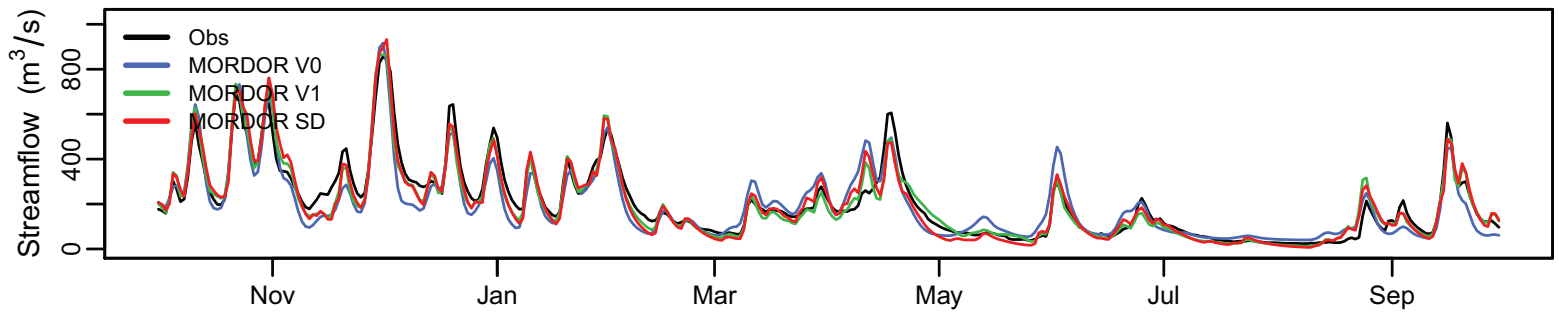

Year 1976

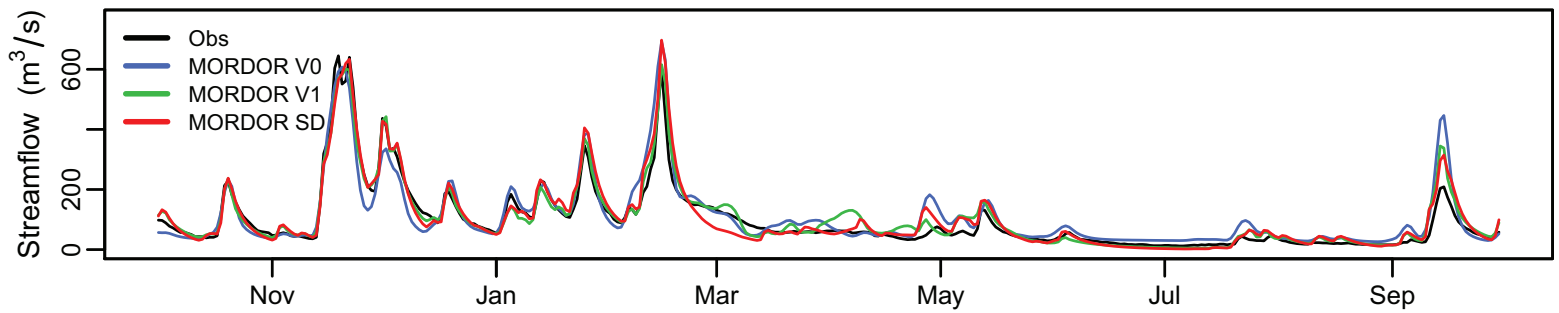

Year 1977

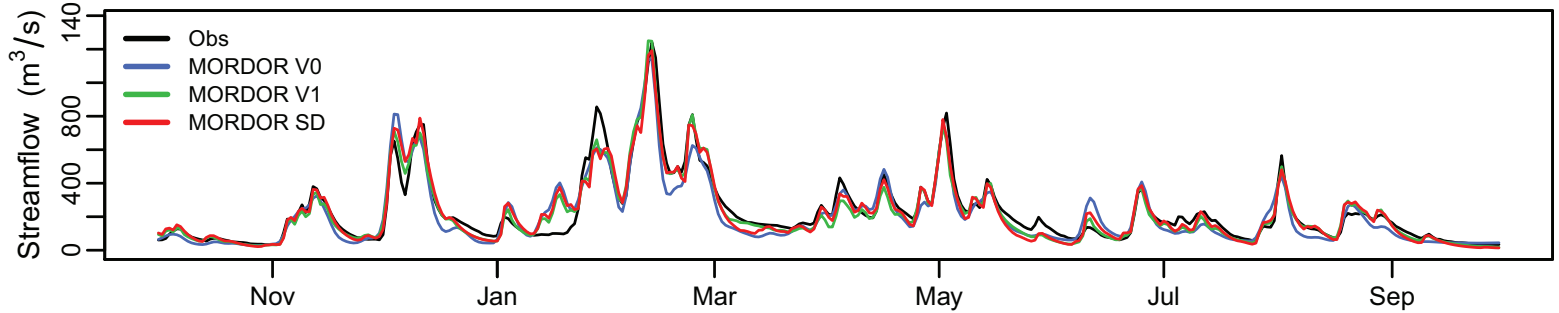

Year 1978

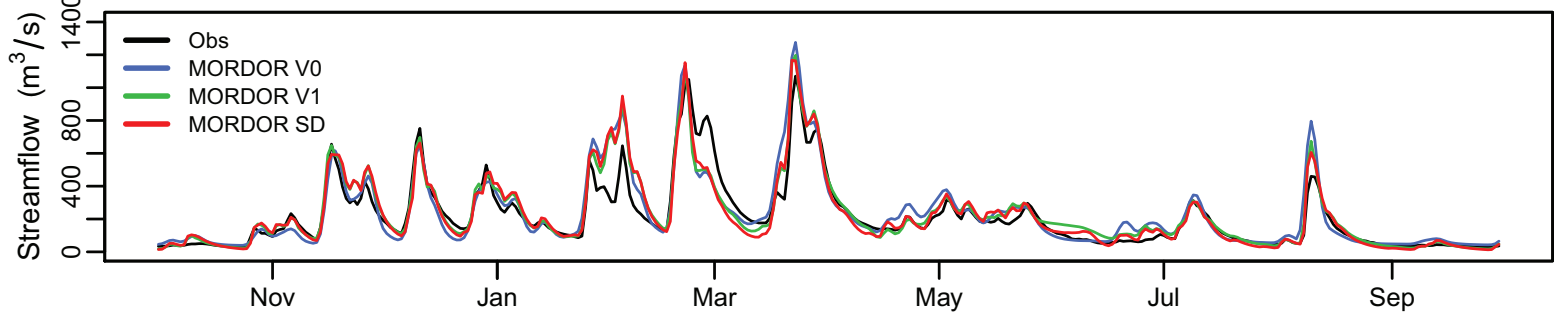

Year 1979

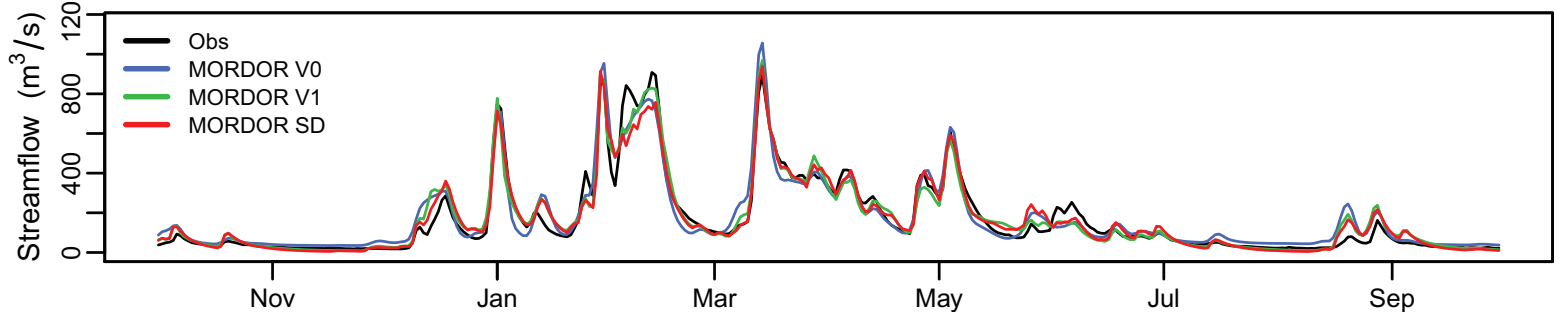

# Doubs@Neublans

Year 1980

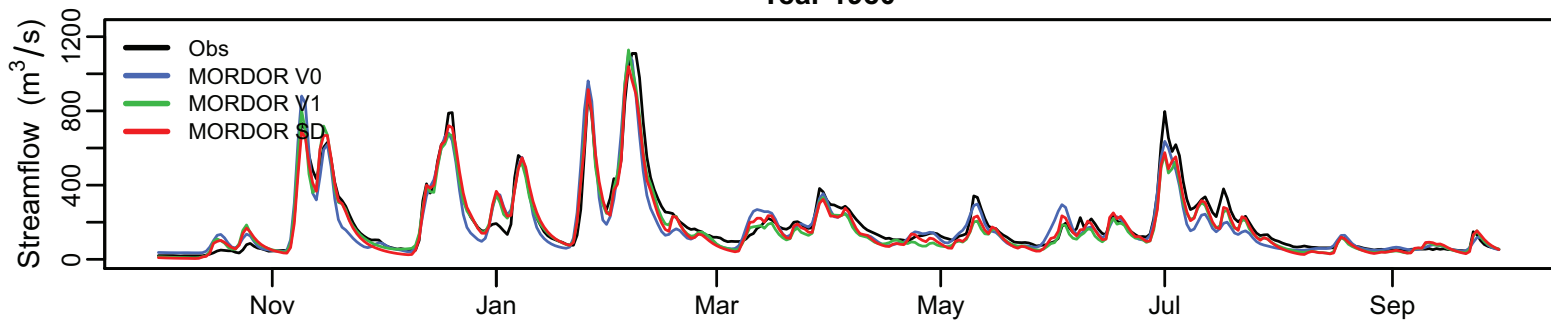

Year 1981

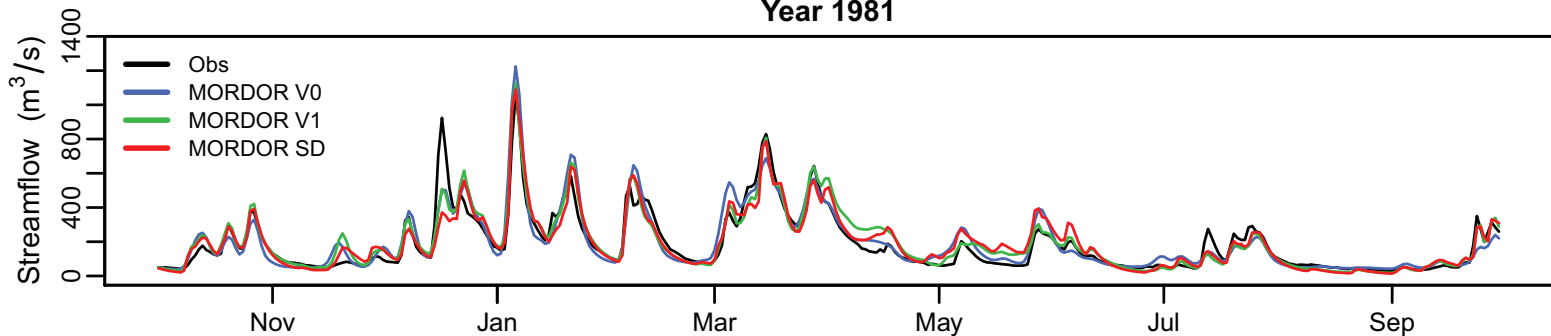

Year 1982

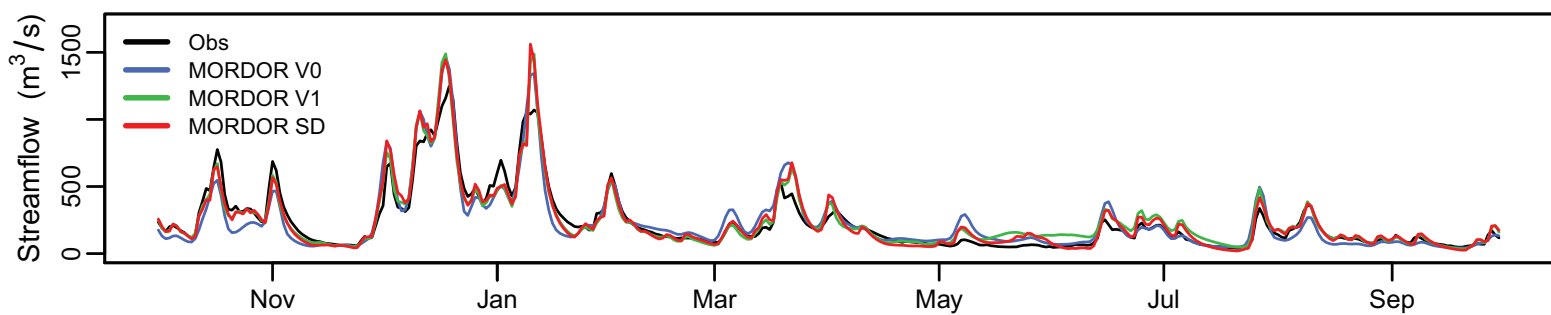

Year 1983

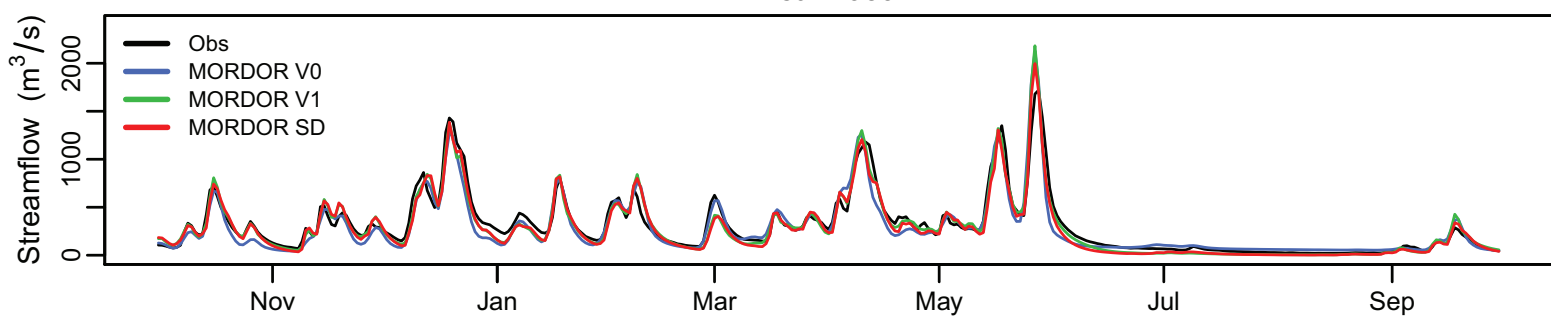

Year 1984

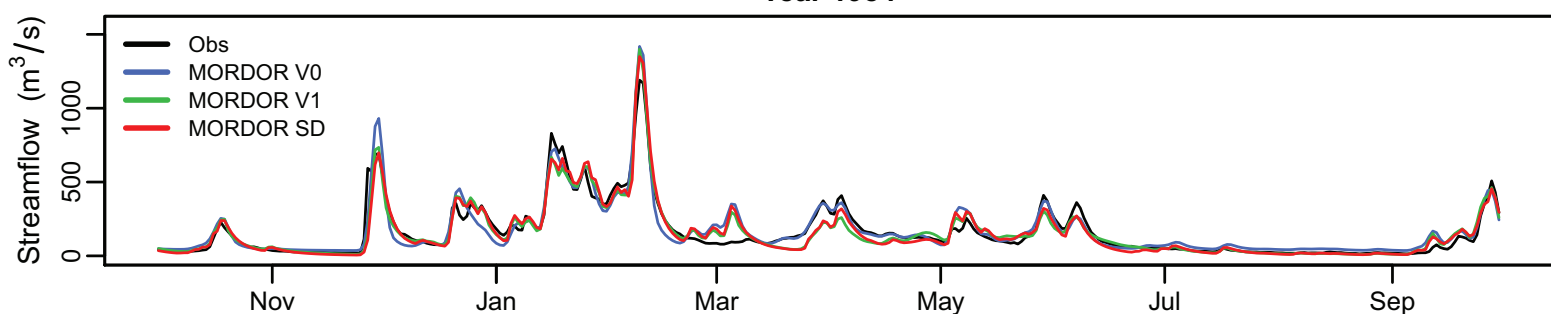

Year 1985

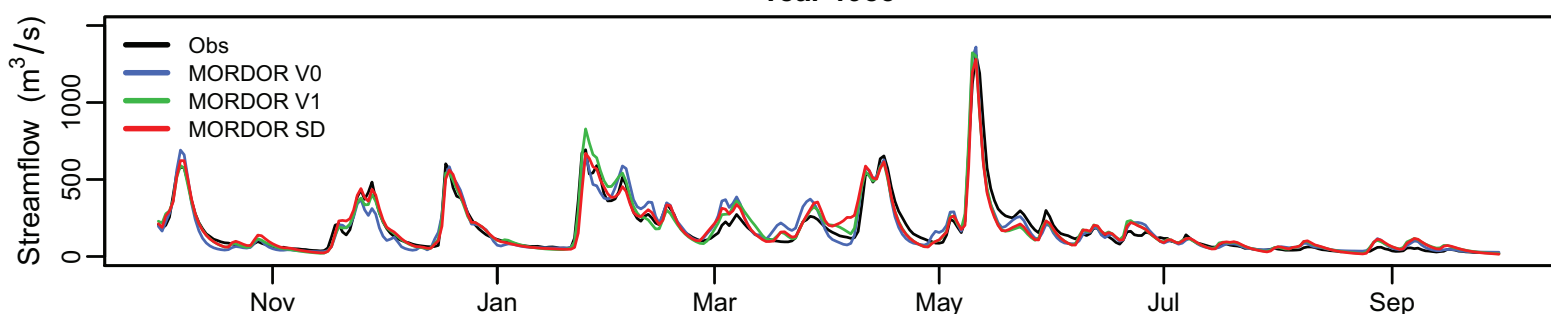

# Doubs@Neublans

Year 1986

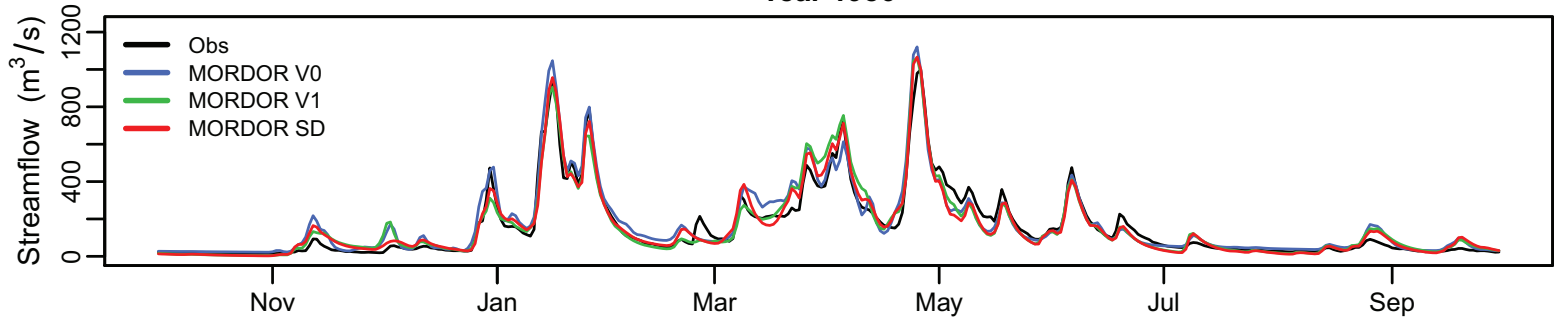

Year 1987

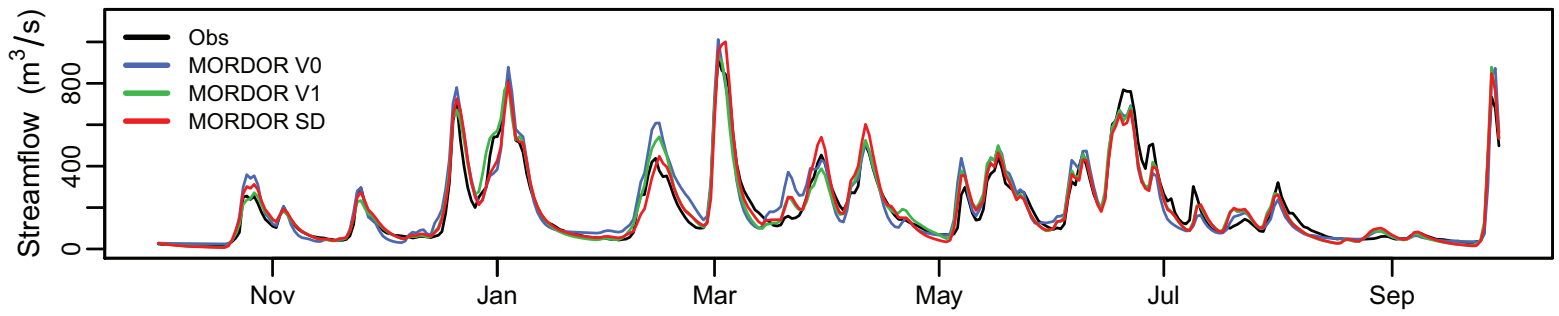

Year 1988

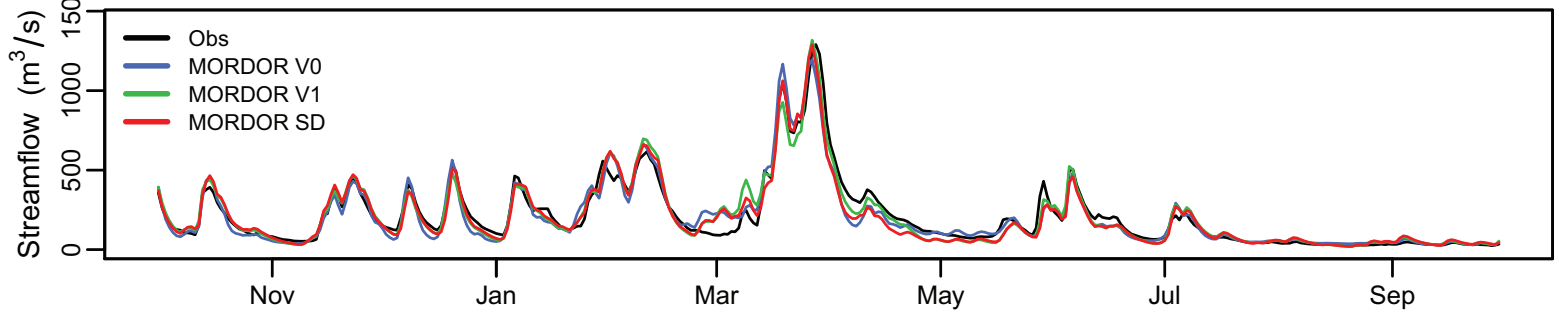

Year 1989

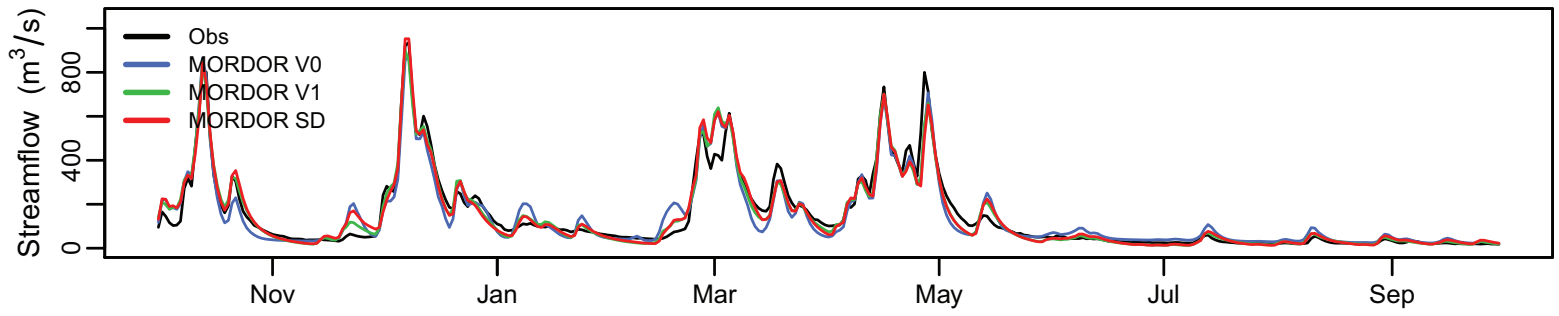

Year 1990

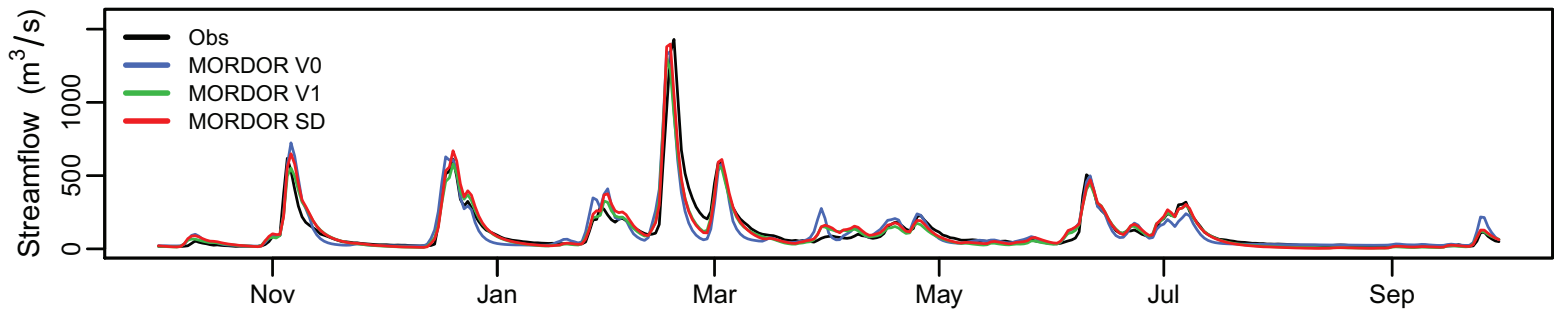

Year 1991

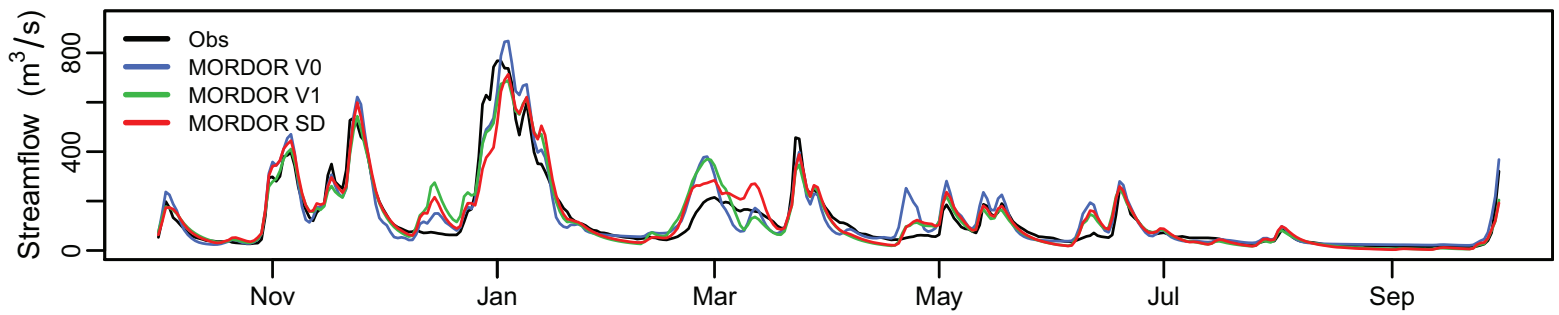

# Doubs@Neublans

Year 1992

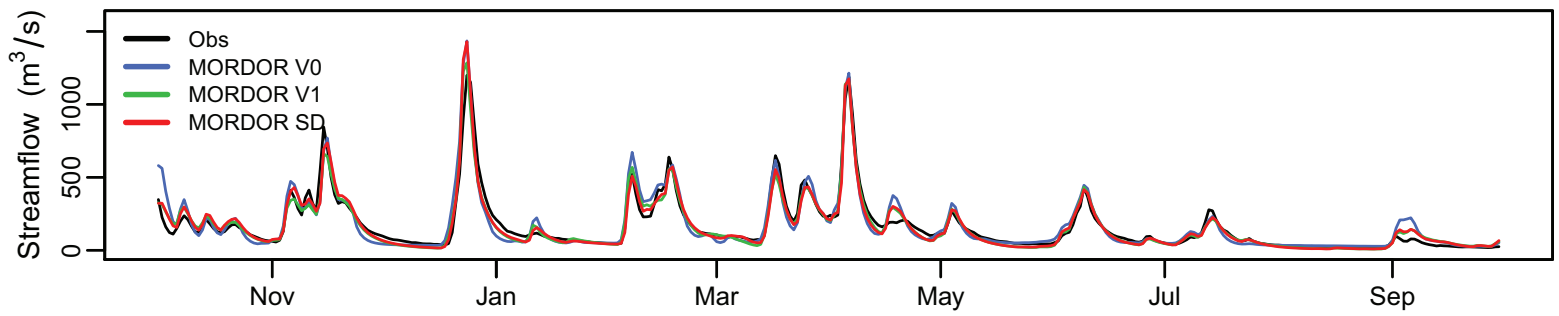

Year 1993

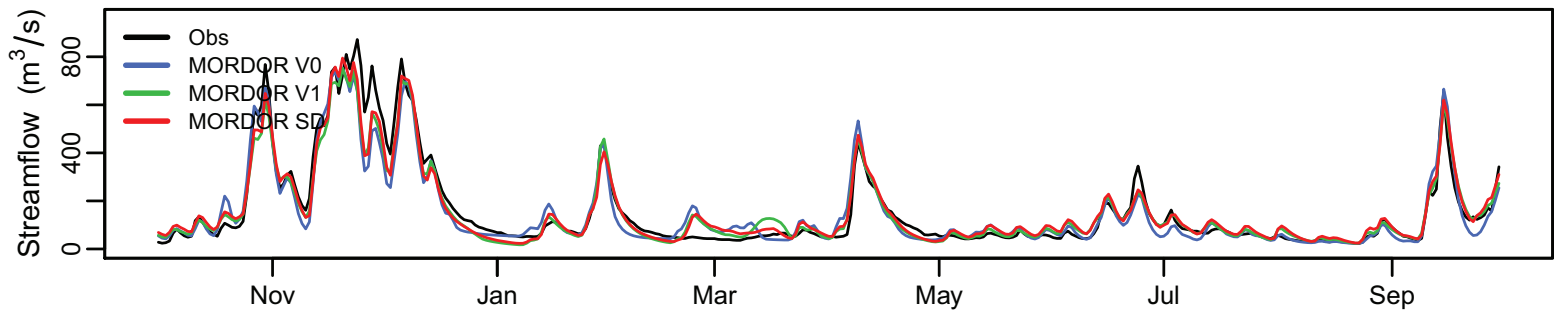

Year 1994

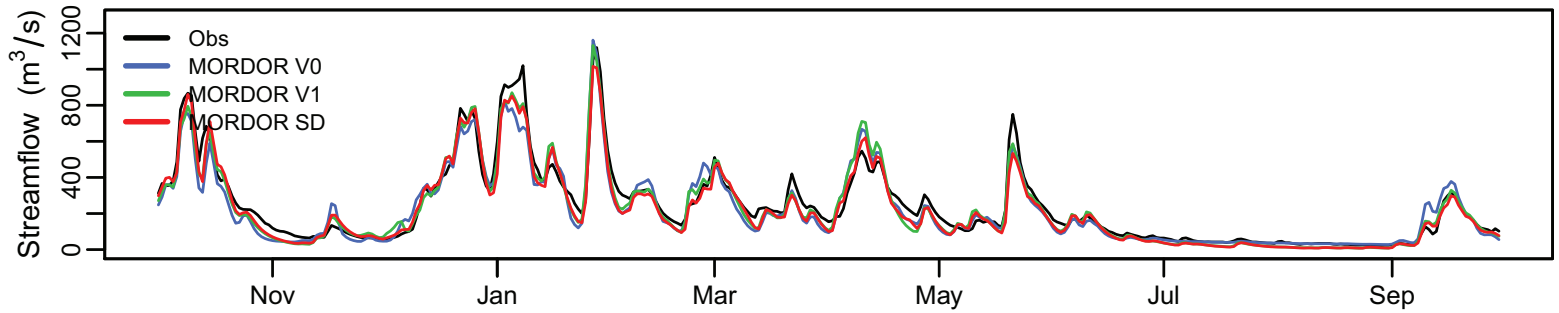

Year 1995

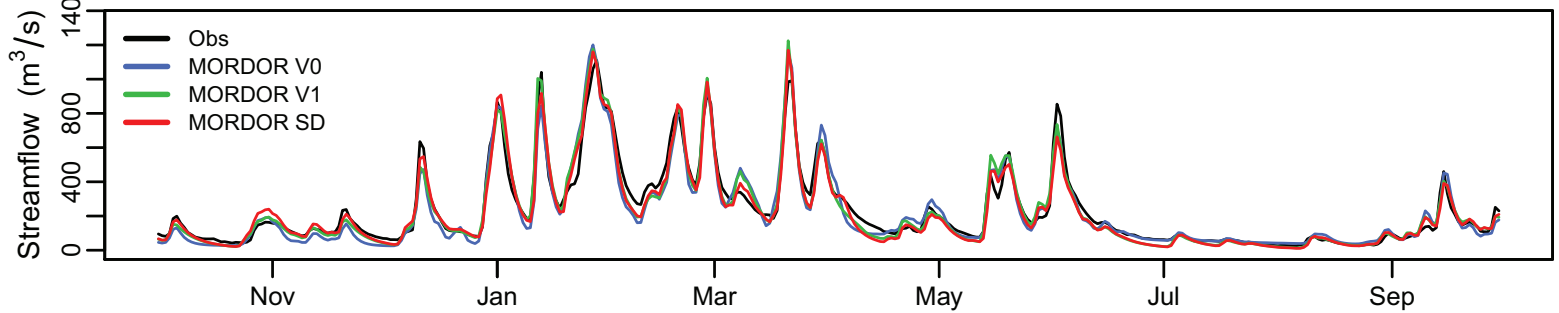

Year 1996

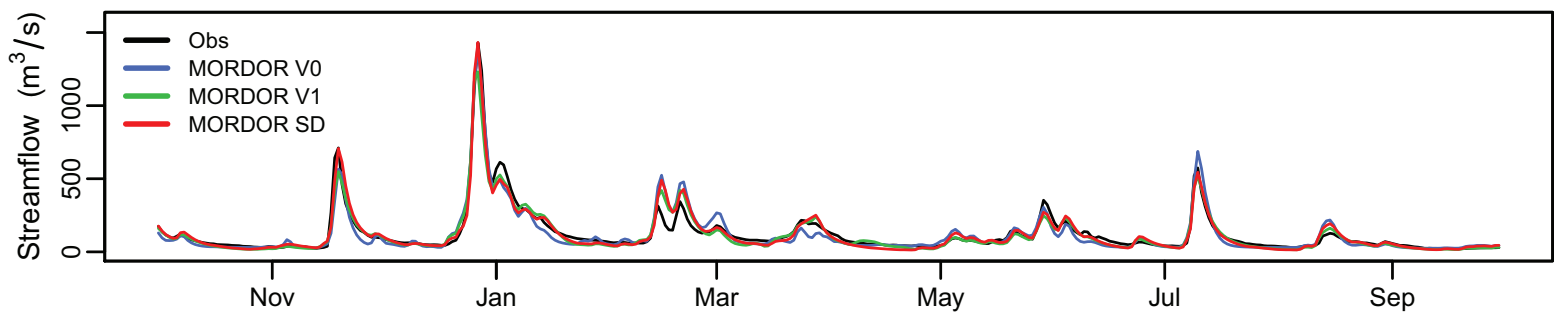

Year 1997

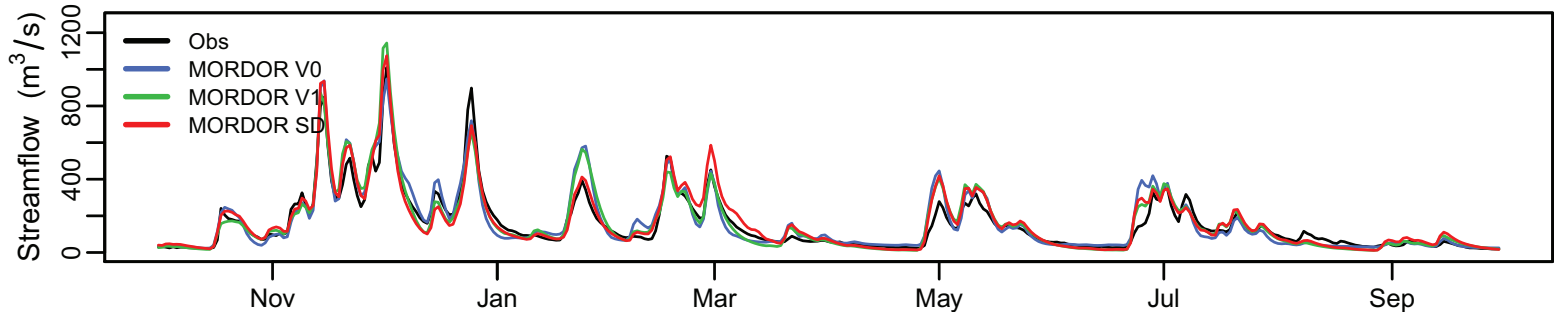

# Doubs@Neublans

Year 1998

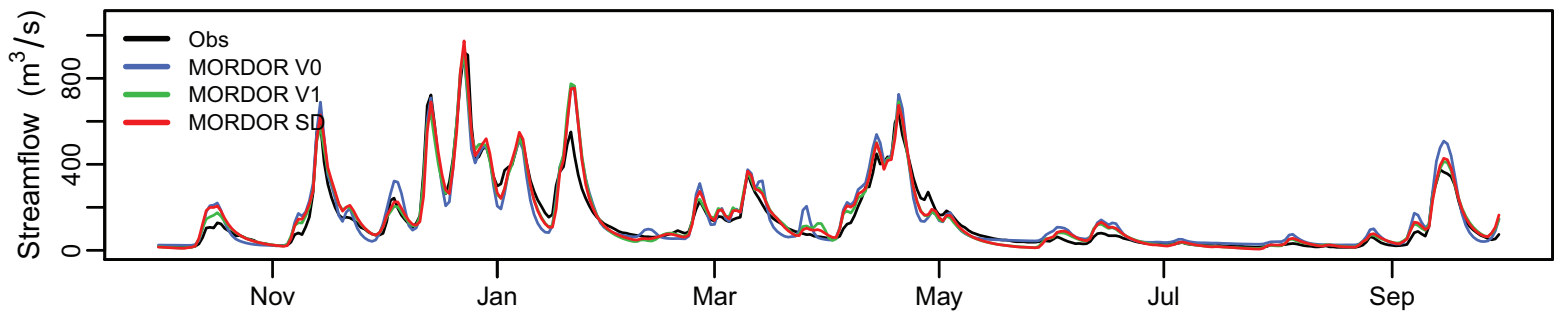

Year 1999

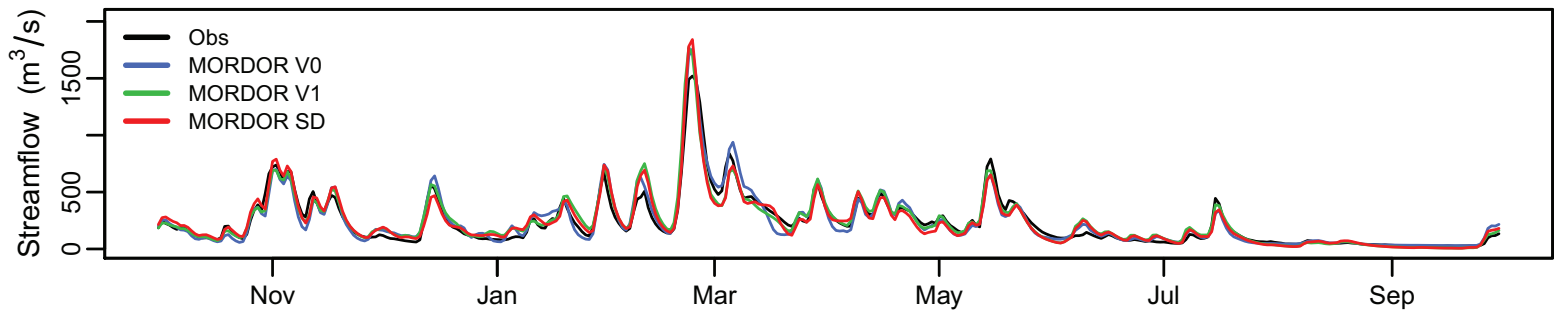

Year 2000

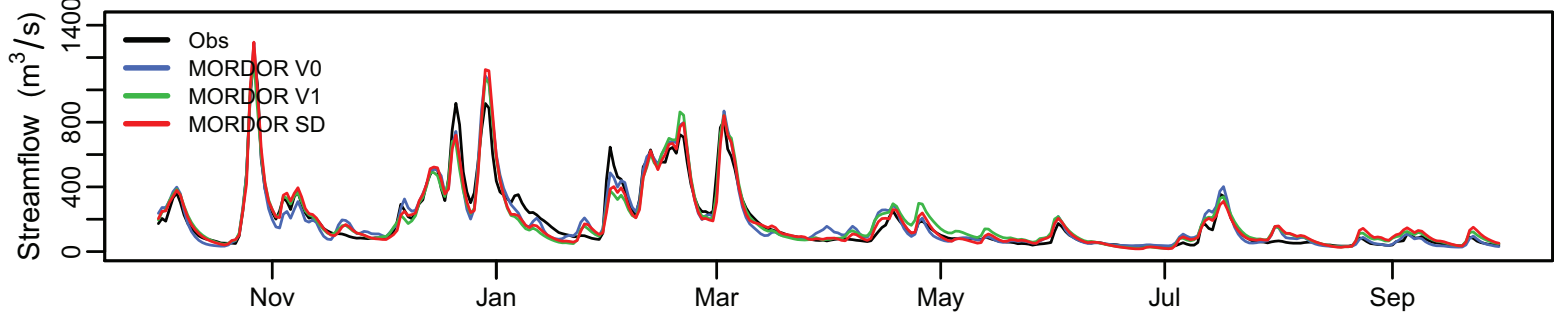

Year 2001

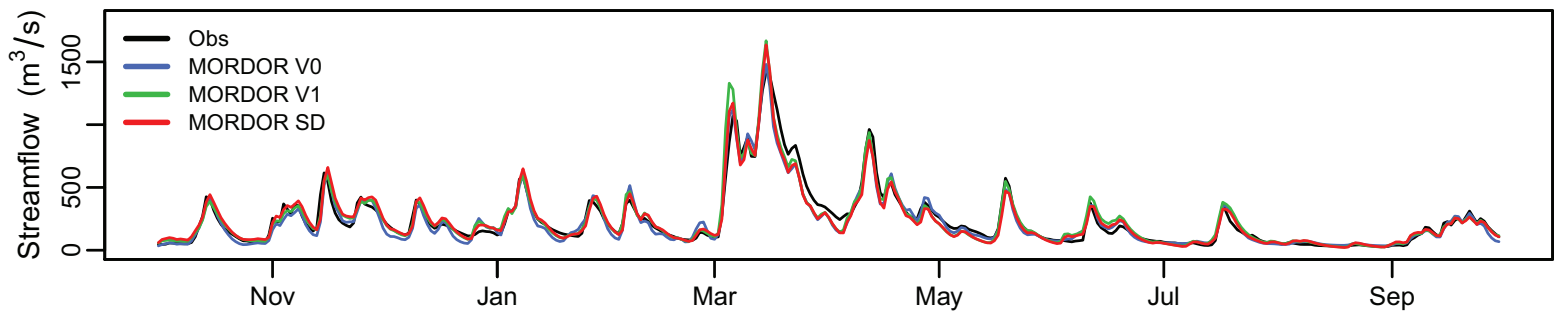



# Drac@Sautet

Year 1970

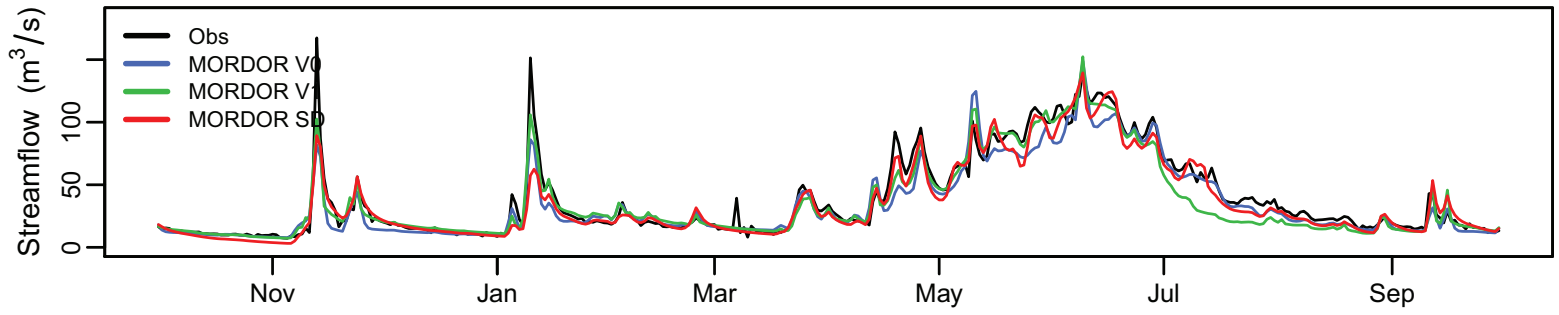

Year 1971

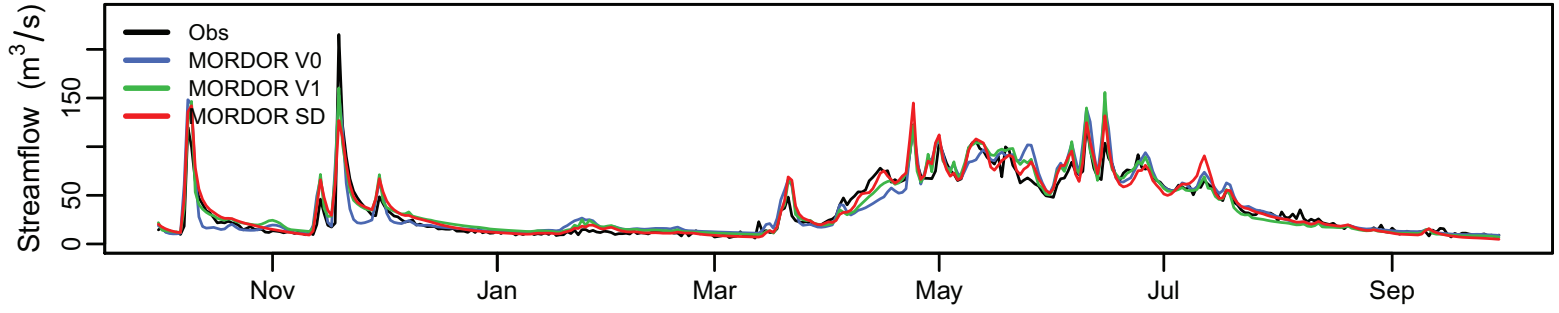

Year 1972

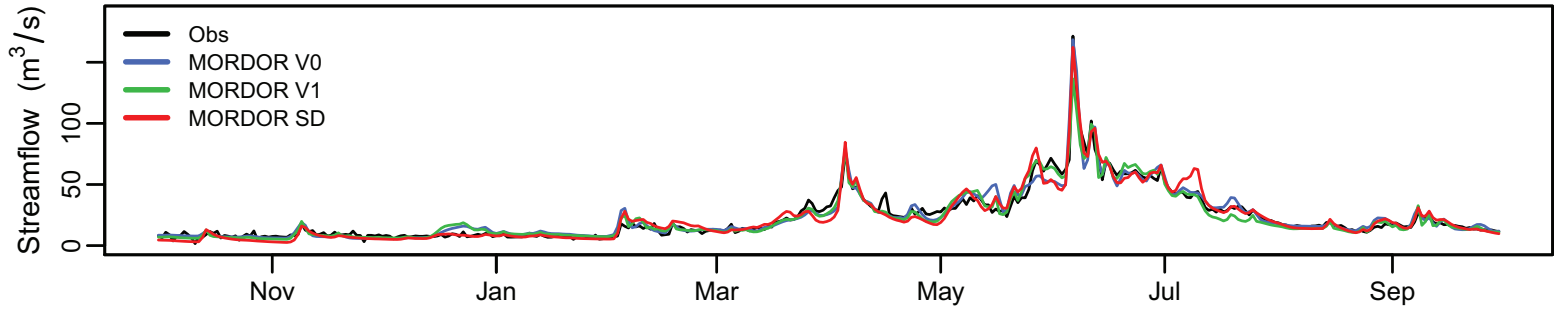

Year 1973

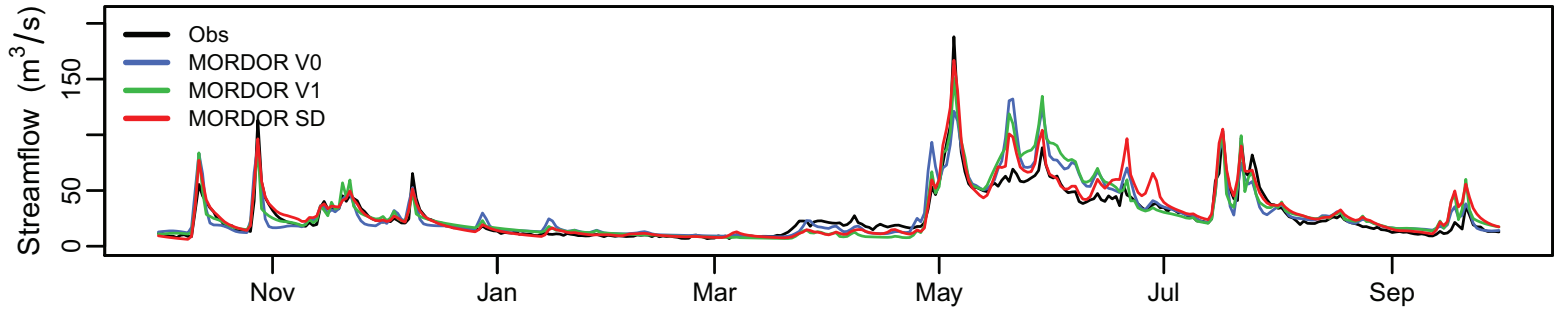

Year 1974

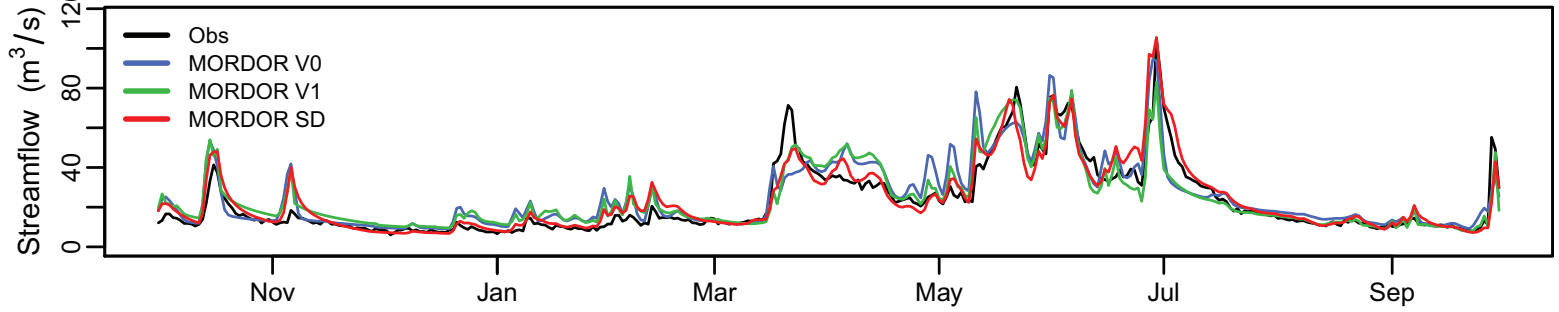

Year 1975

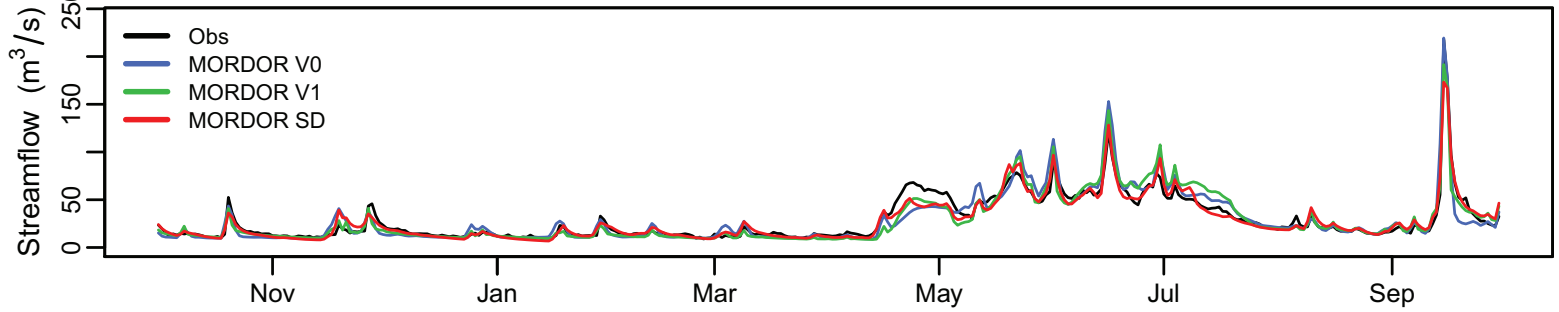

# Drac@Sautet

Year 1976

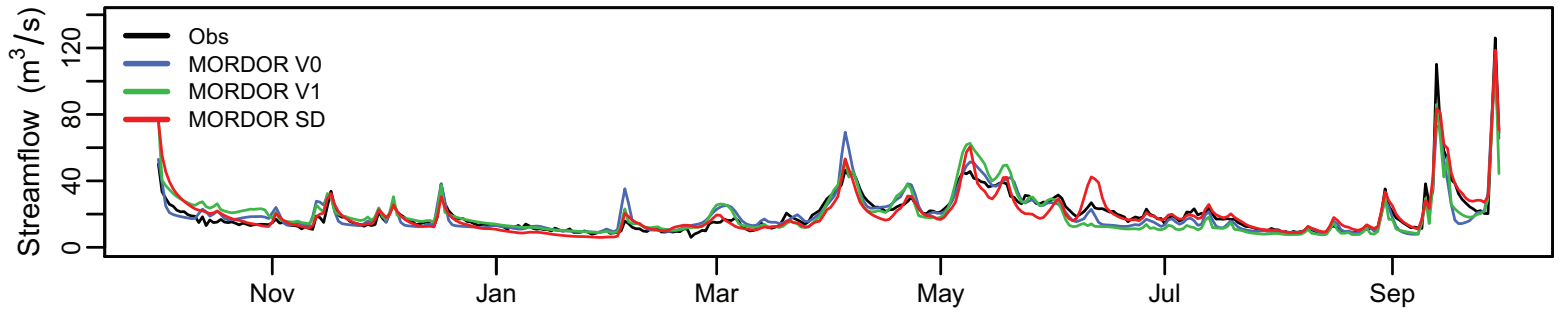

Year 1977

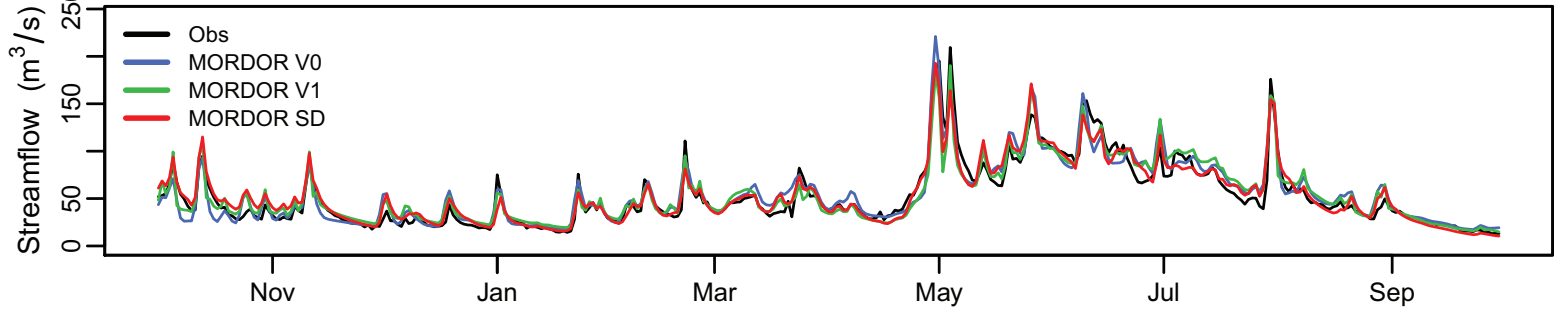

Year 1978

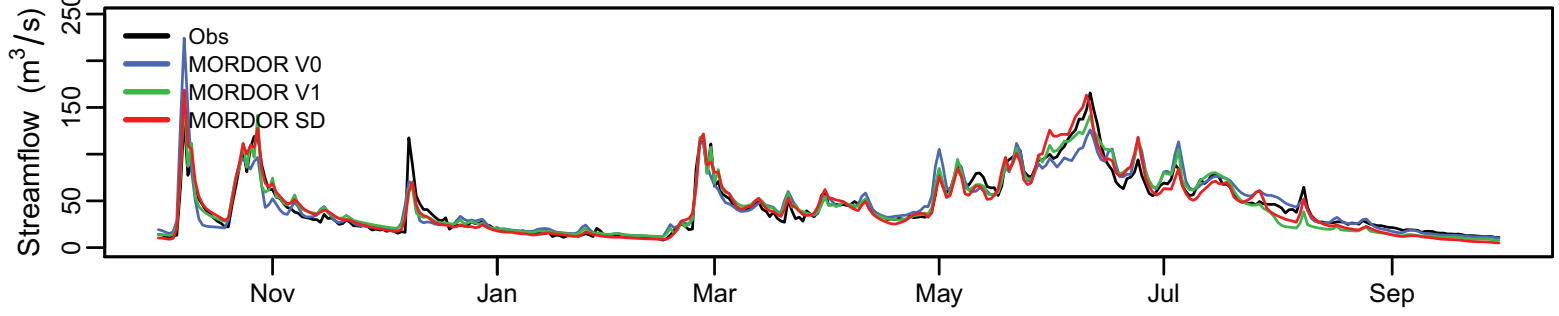

Year 1979

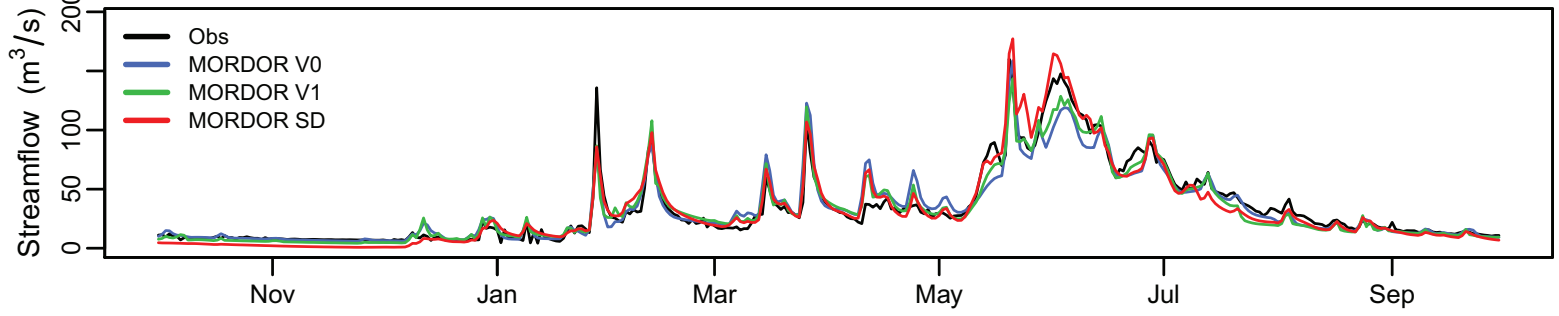

Year 1980

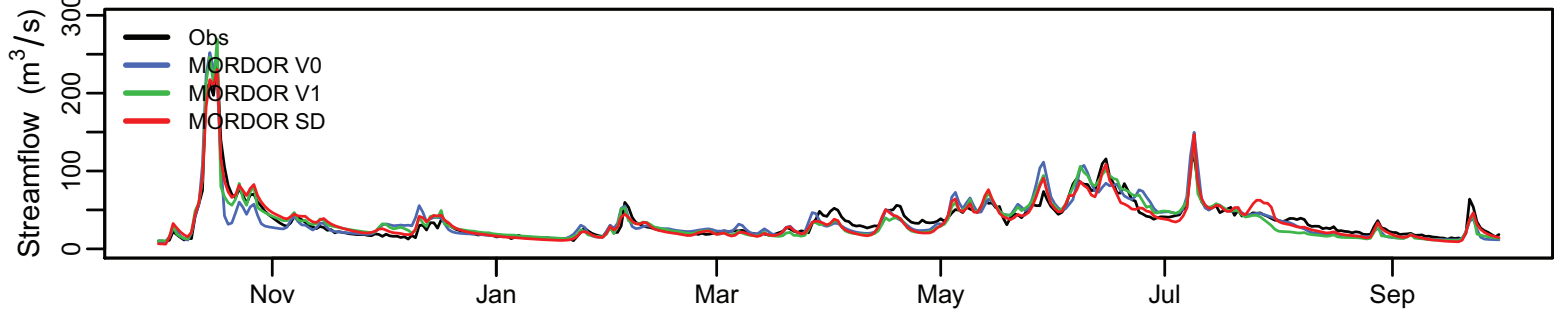

Year 1981

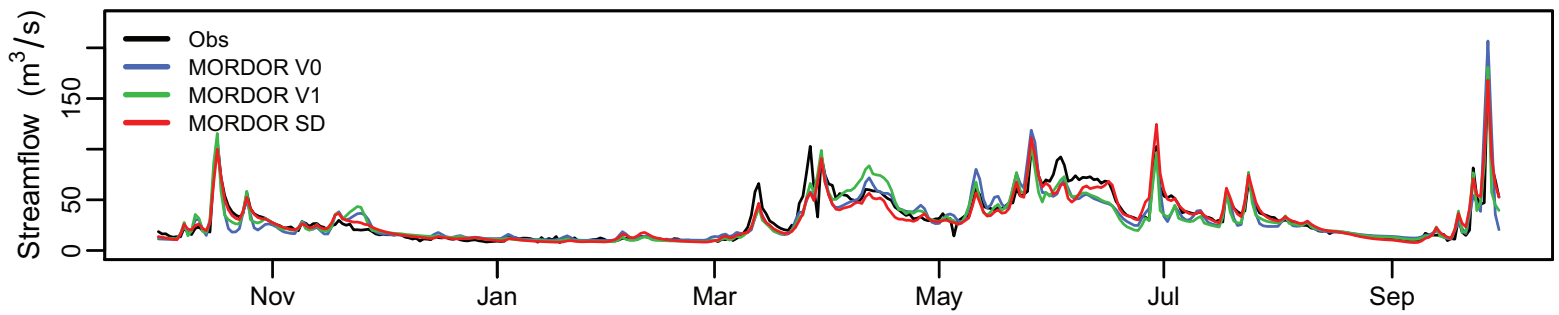

# Drac@Sautet

Year 1982

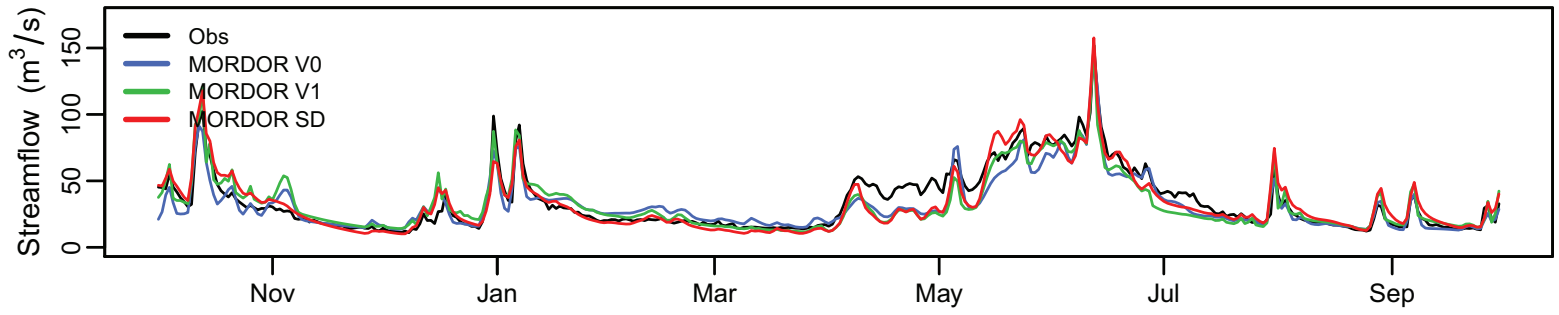

Year 1983

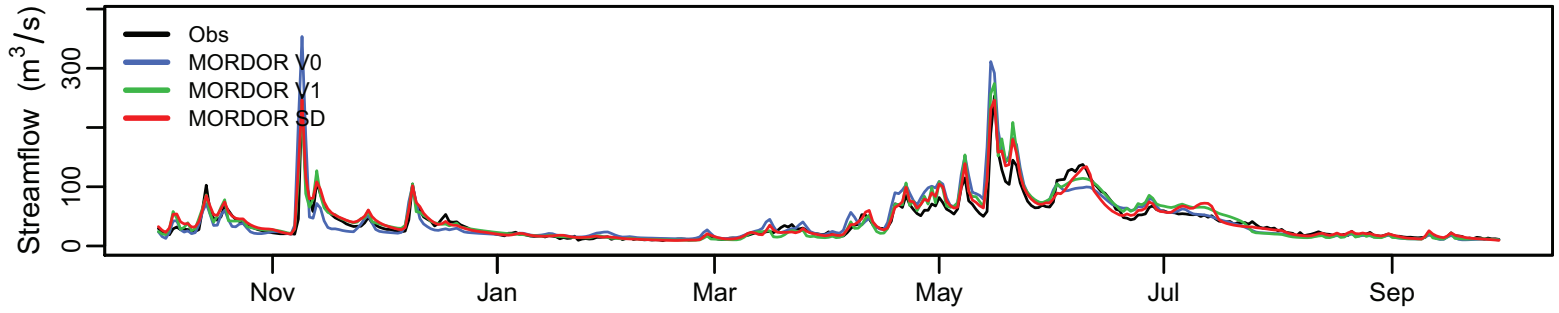

Year 1984

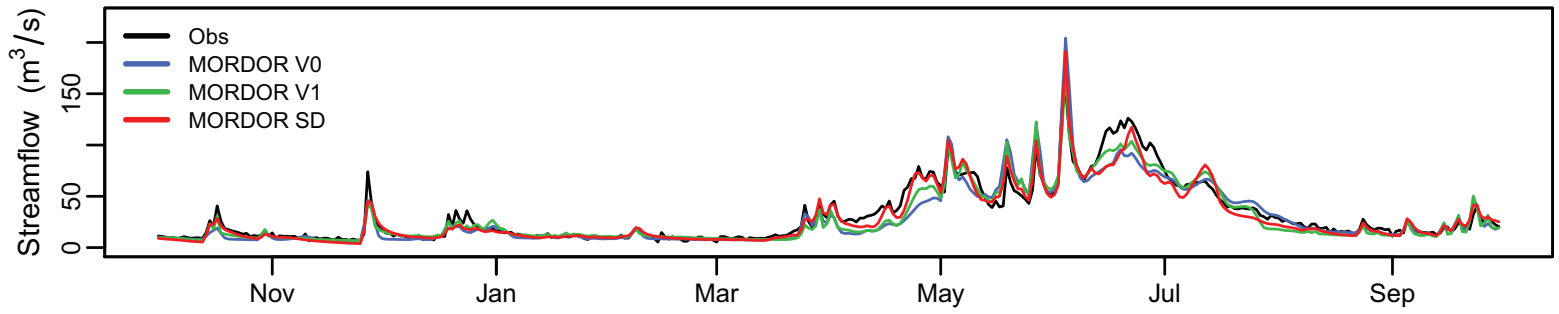

Year 1985

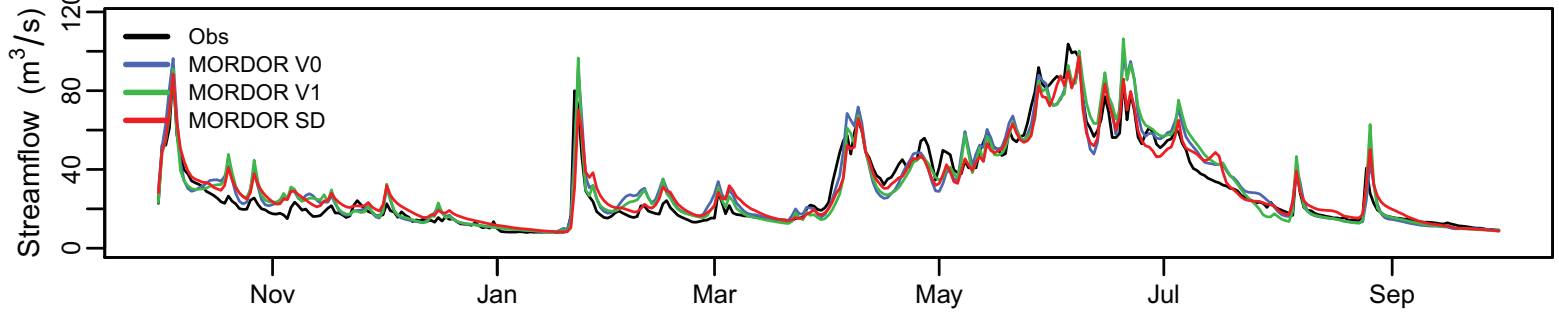

Year 1986

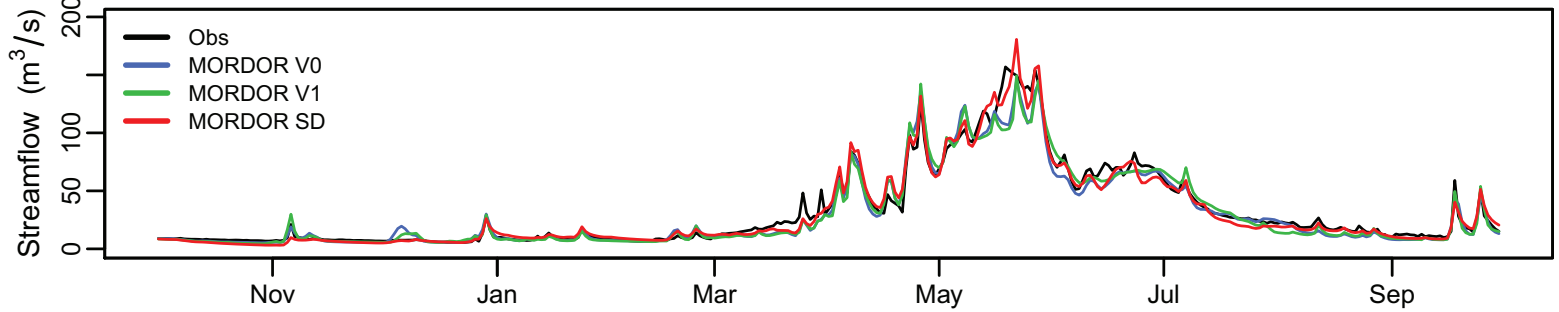

Year 1987

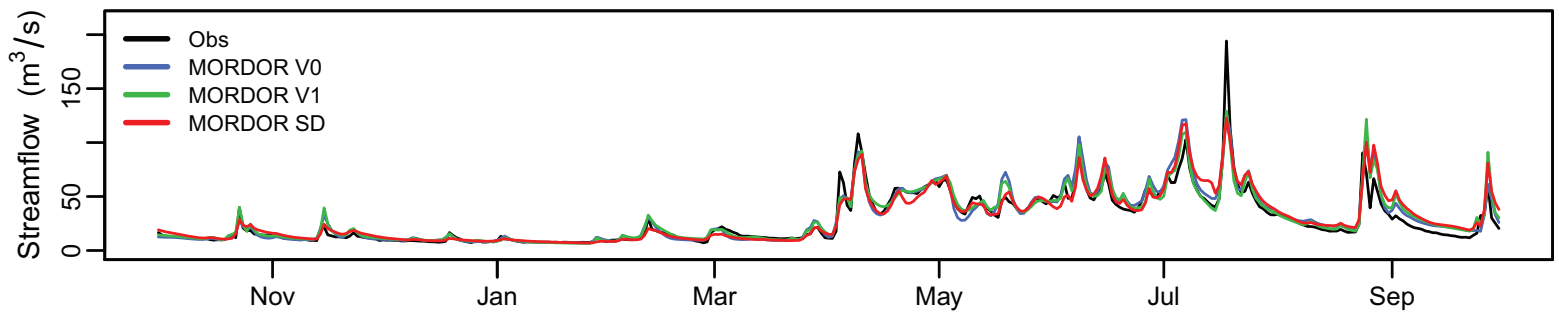

# Drac@Sautet

Year 1988

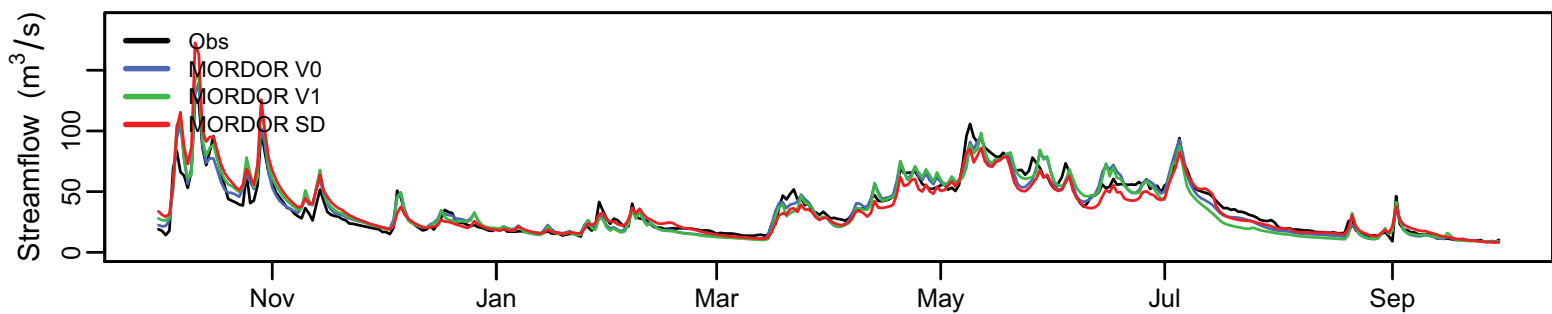

Year 1989

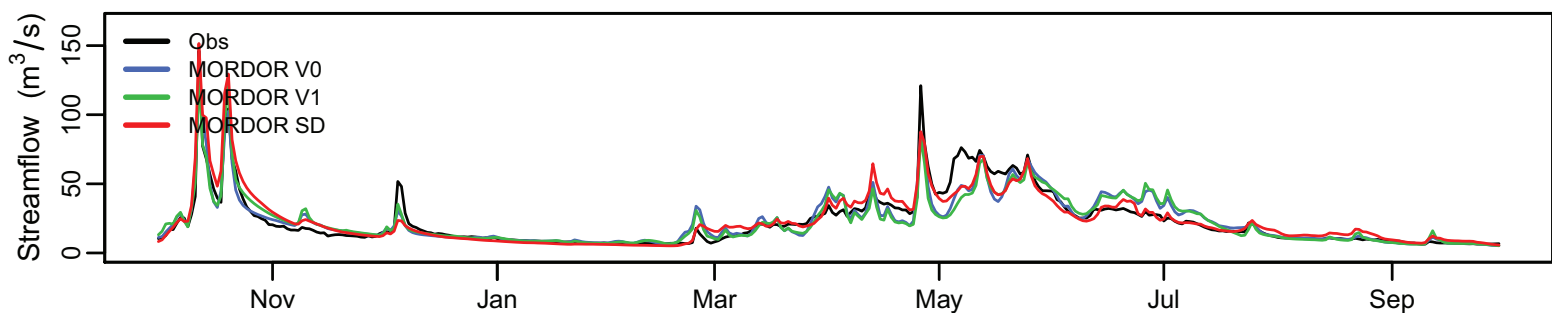

Year 1990

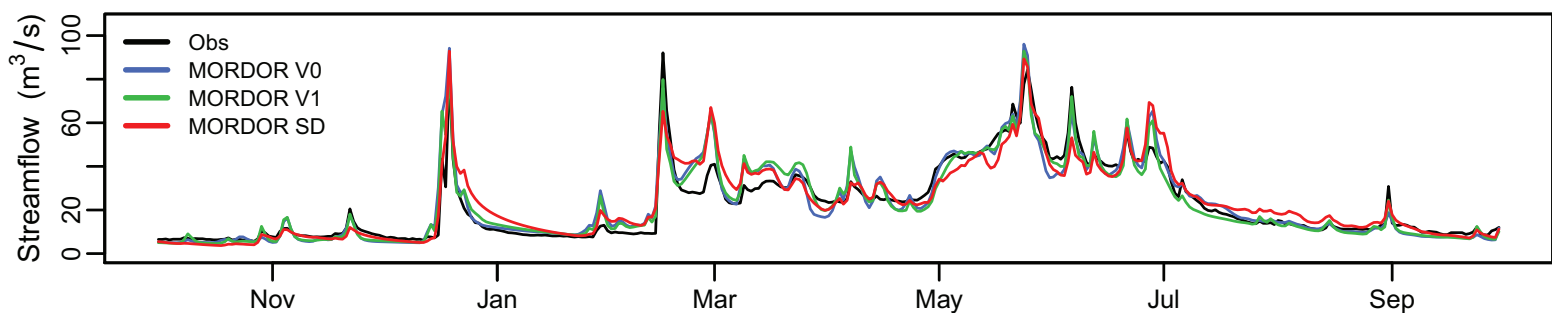

Year 1991

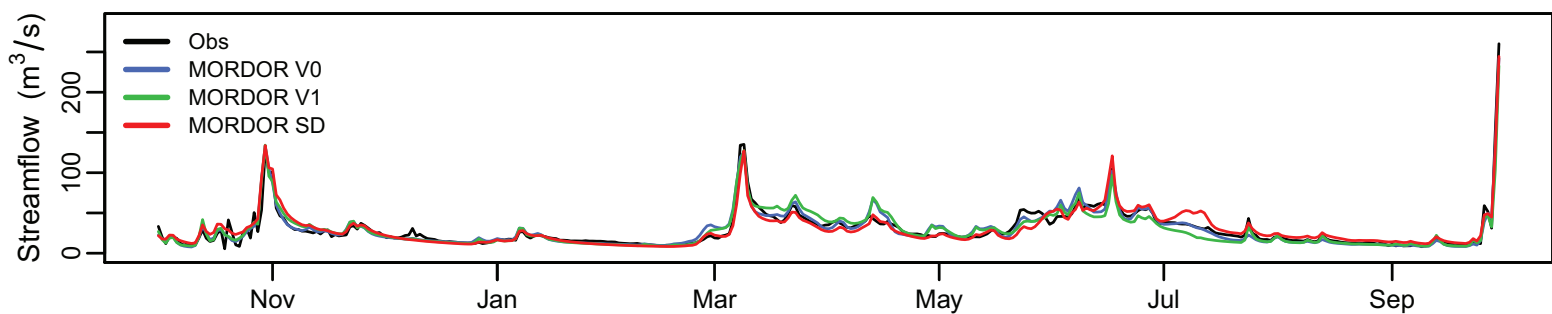

Year 1992

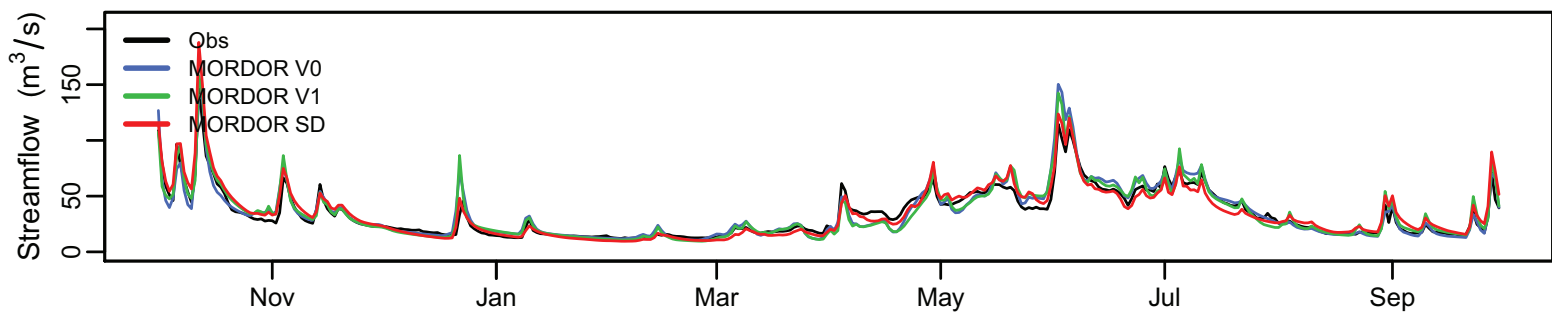

Year 1993

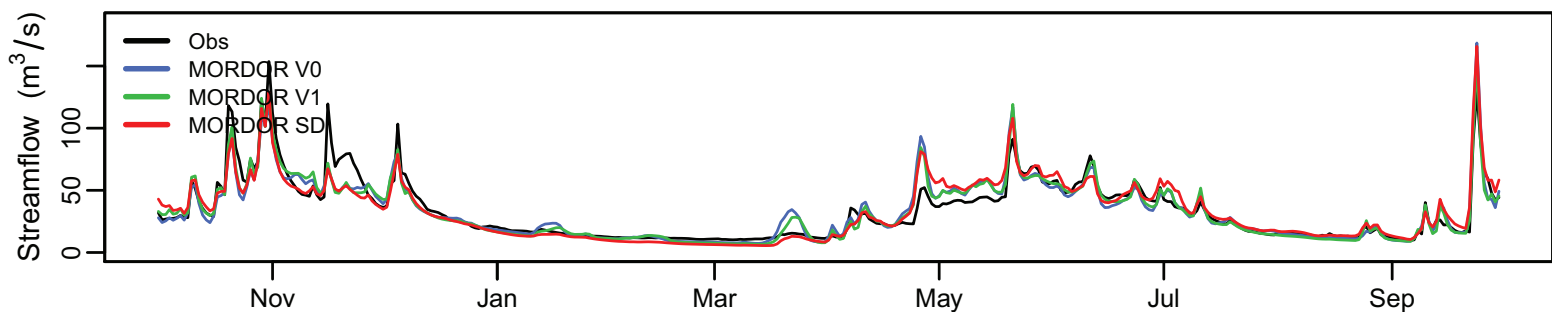

# Drac@Sautet

Year 1994

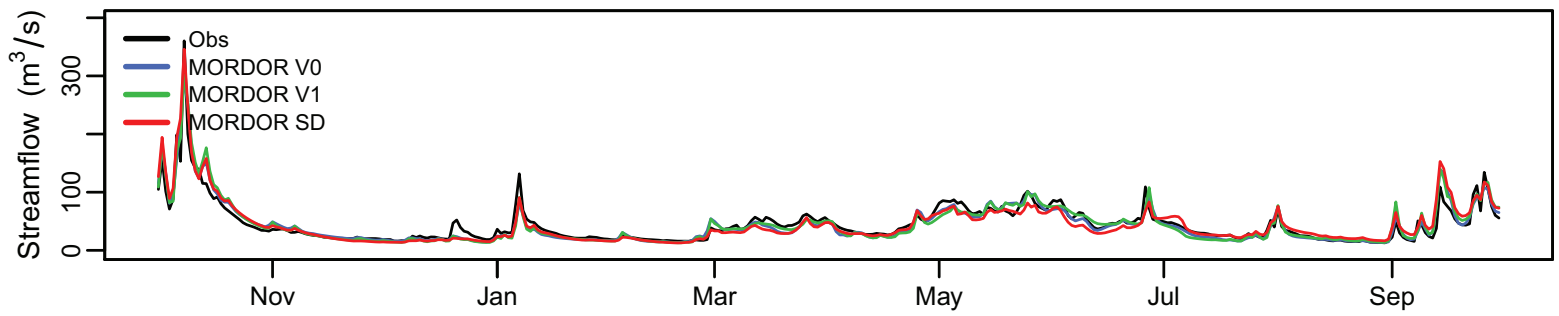

Year 1995

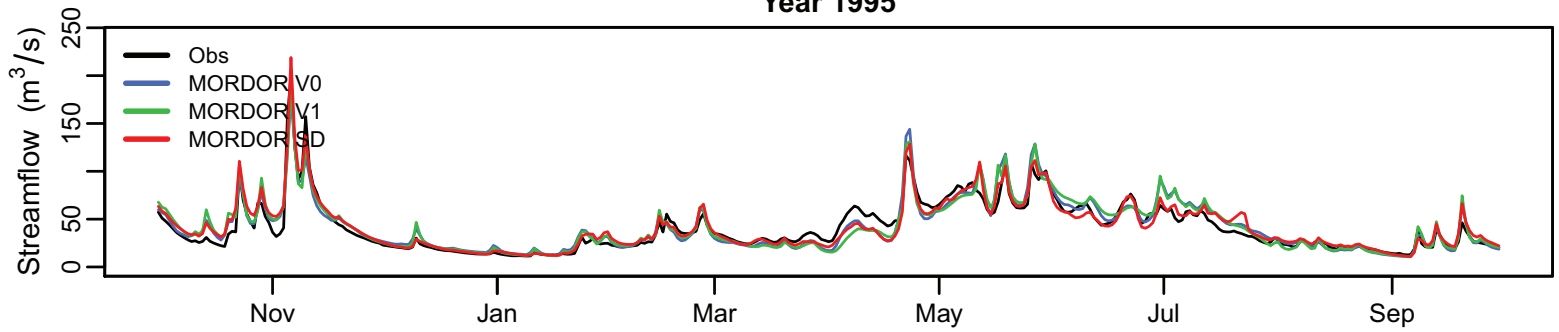

Year 1996

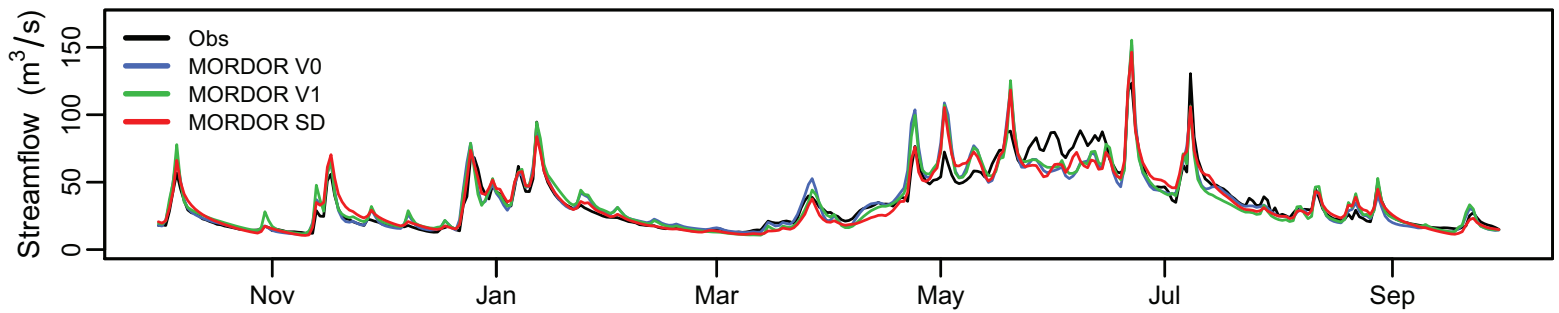

Year 1997

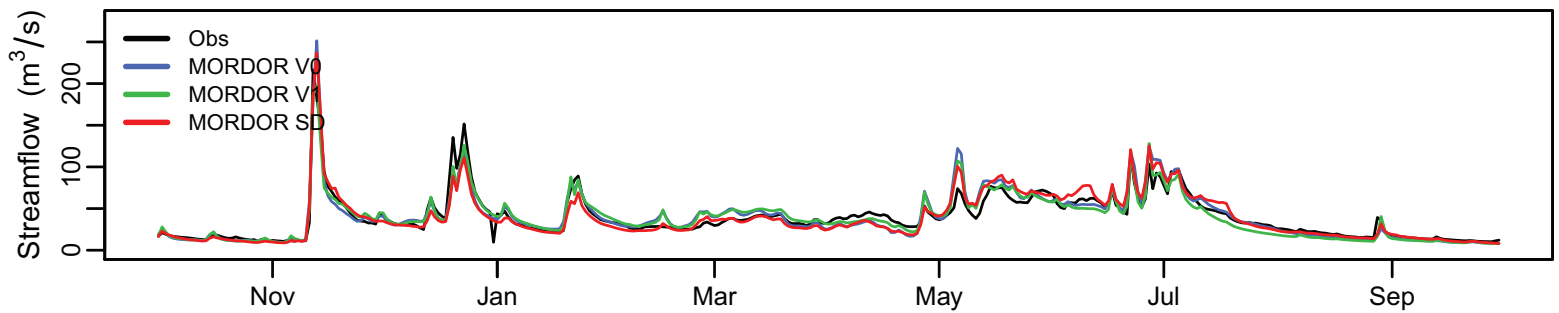

Year 1998

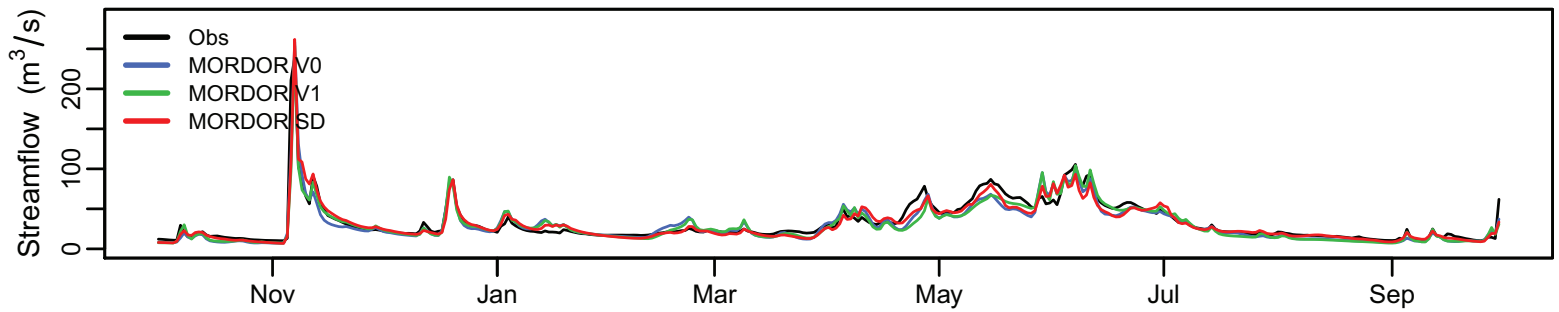

Year 1999

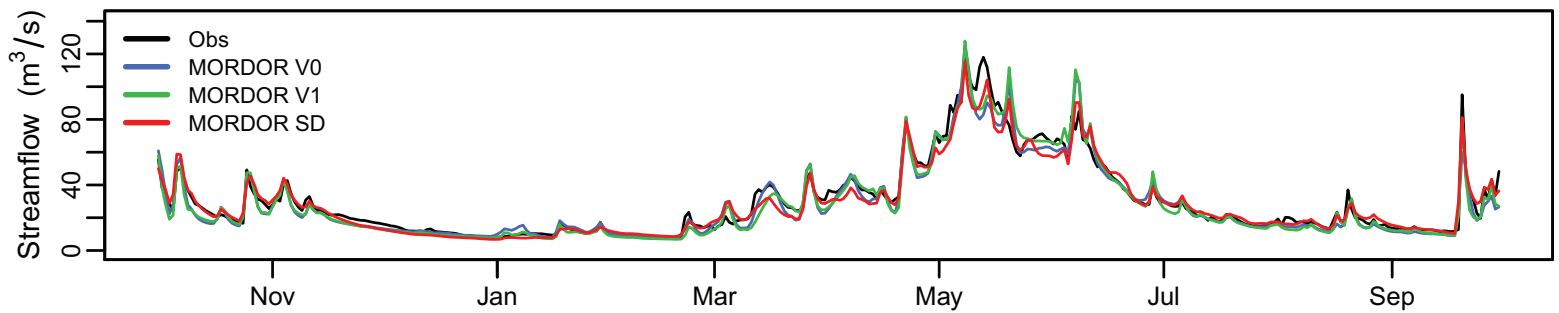

# Durance@Clapiere

Year 1983

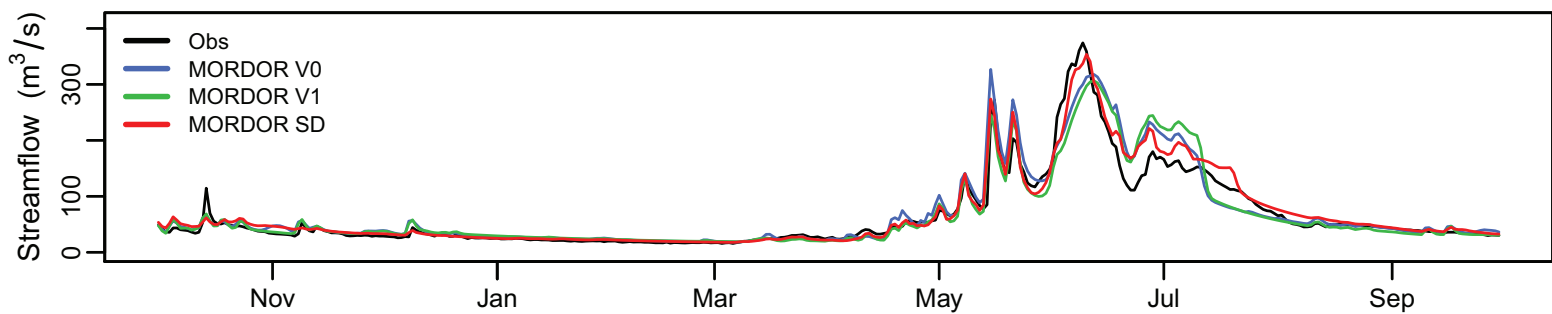

Year 1984

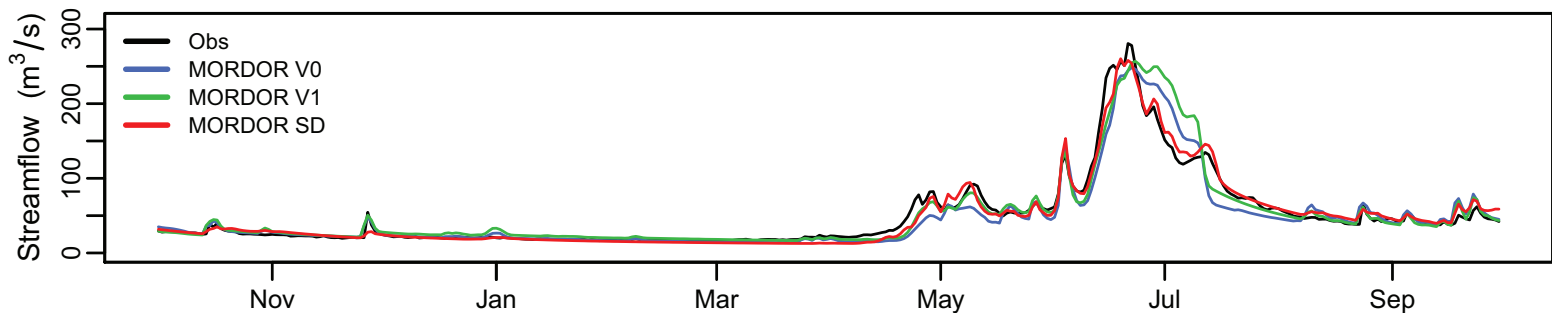

Year 1985

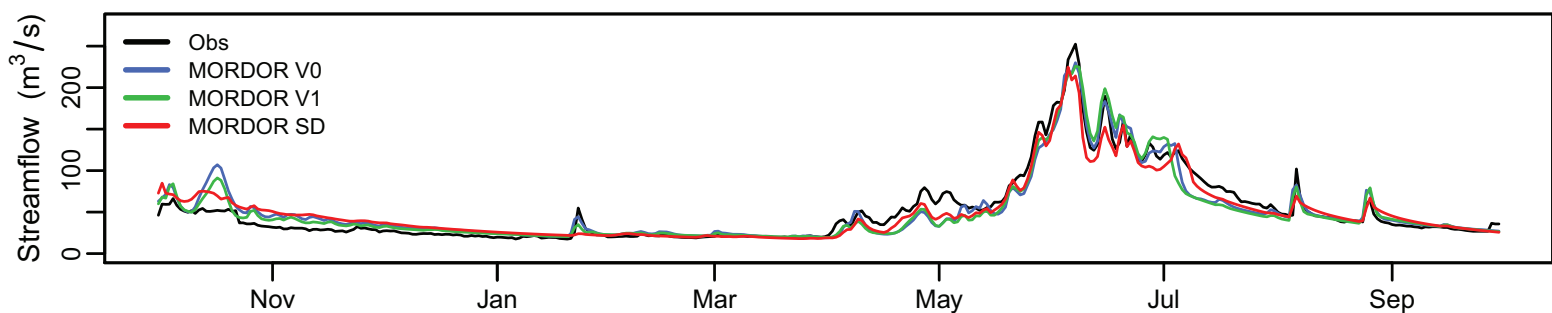

Year 1986

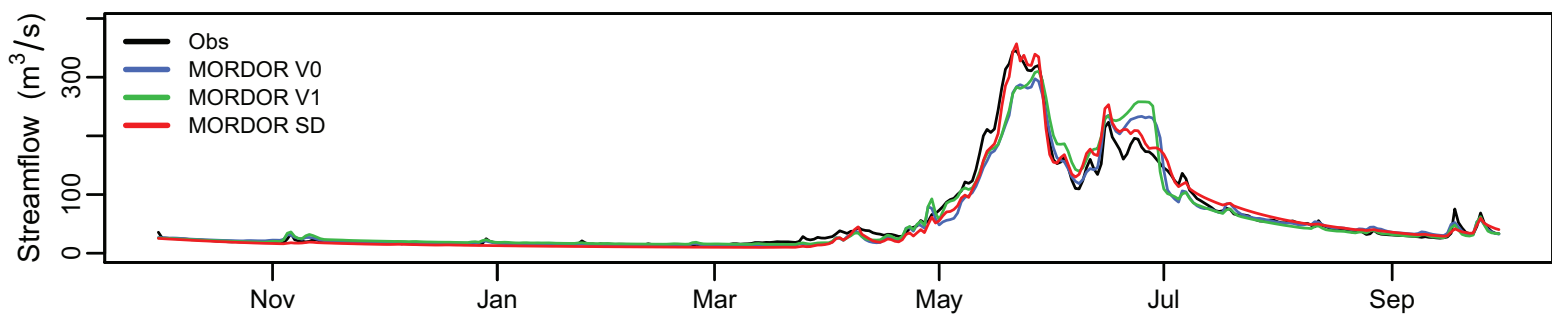

Year 1987

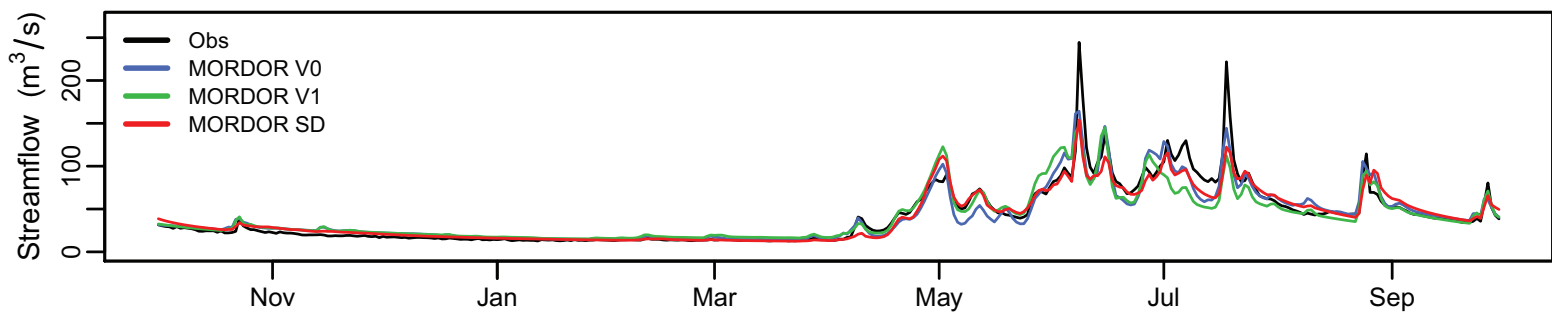

Year 1988

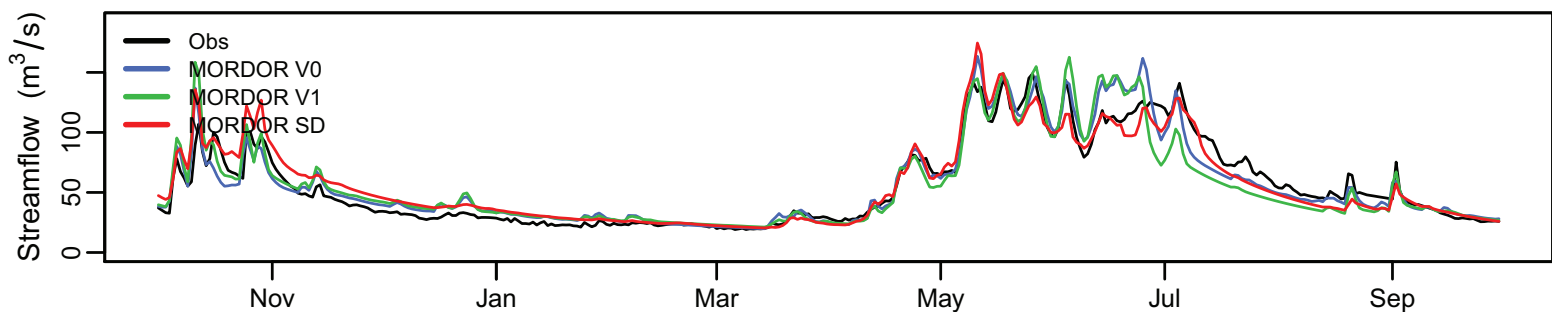

# Durance@Clapiere

Year 1989

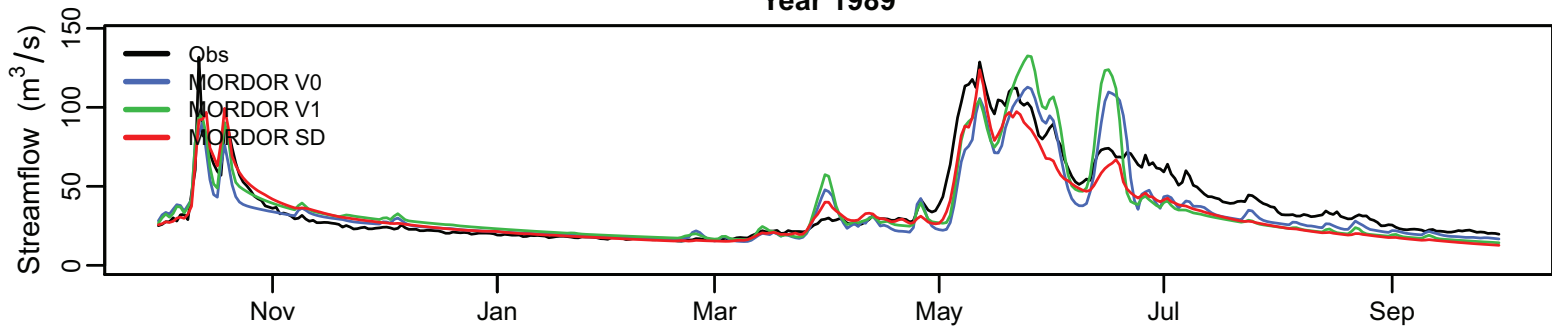

Year 1990

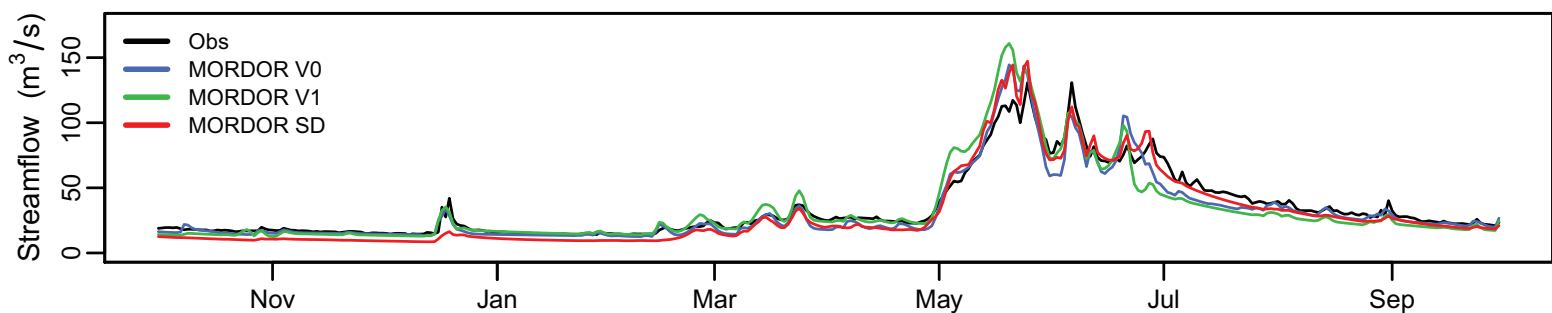

Year 1991

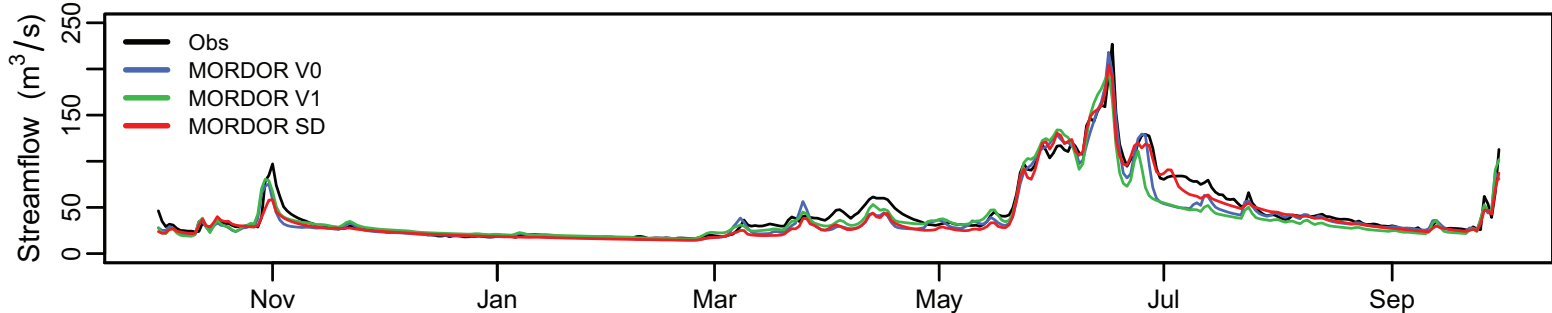

Year 1992

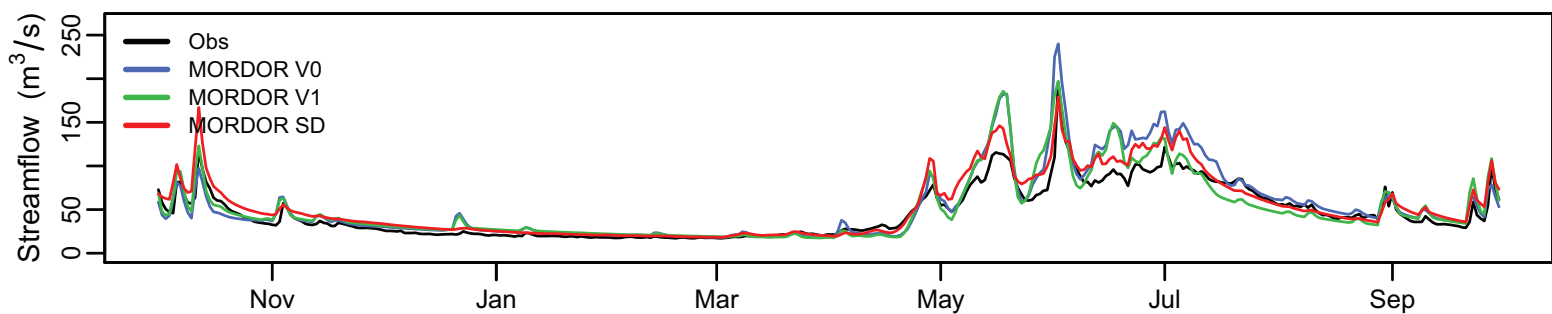

Year 1993

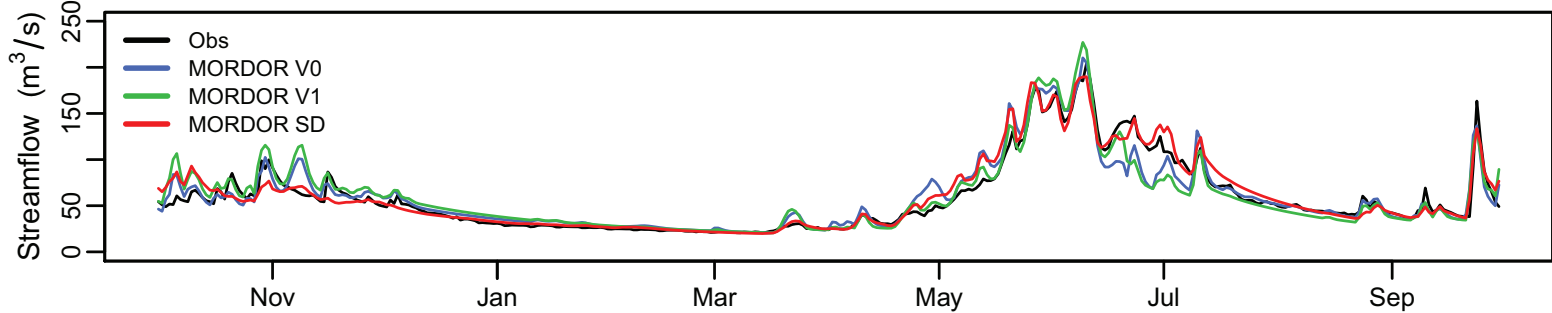

Year 1994

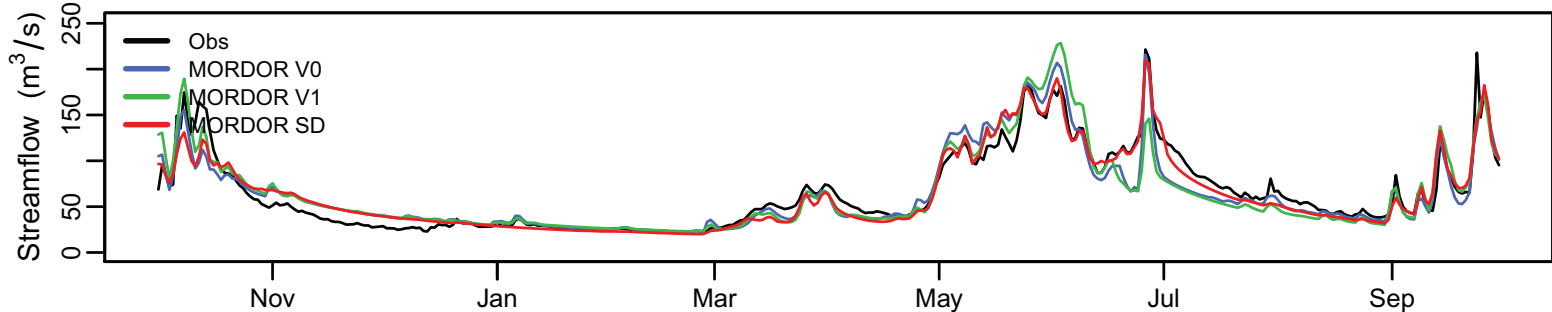

# Durance@Clapiere

Year 1995

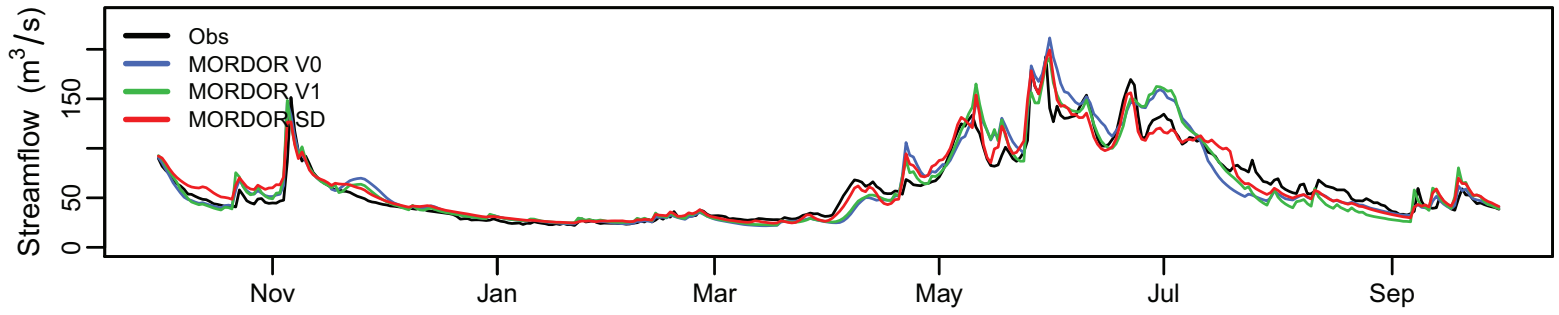

Year 1996

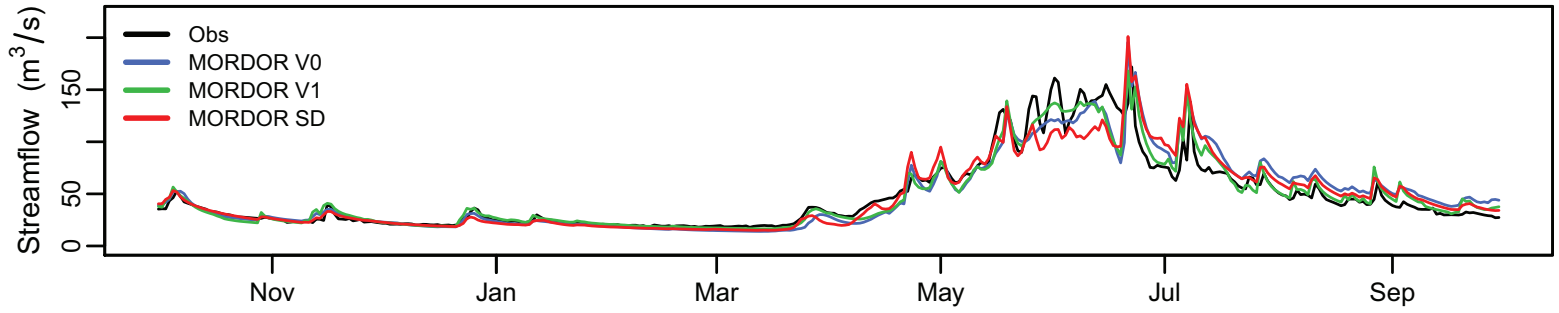

Year 1997

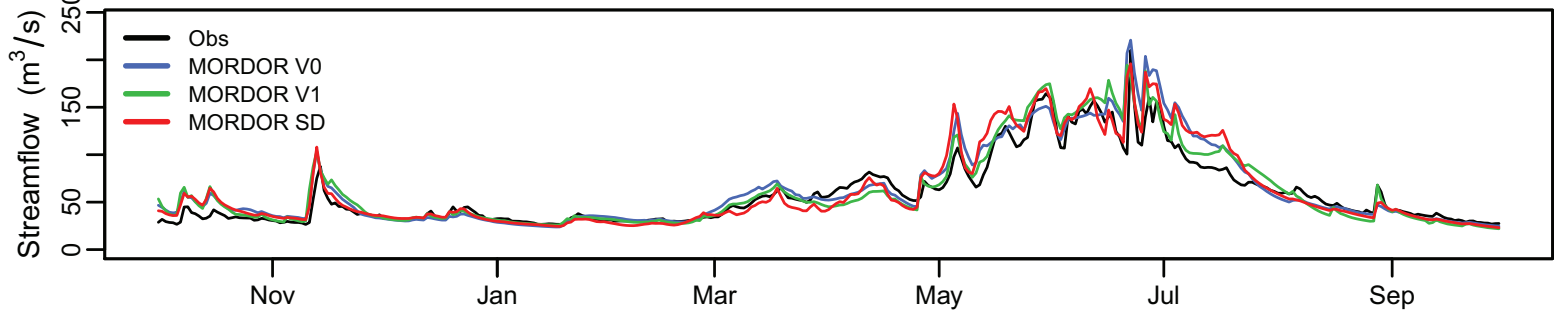

Year 1998

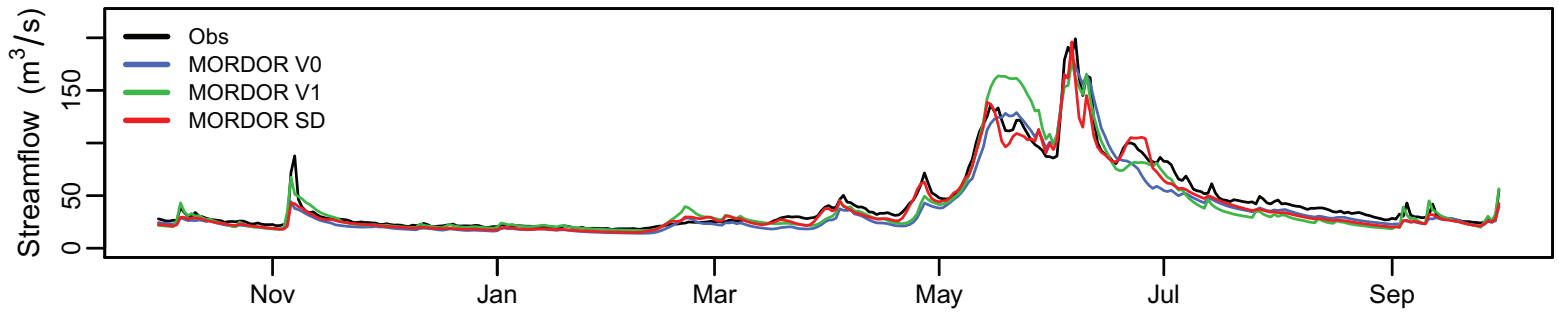

Year 1999

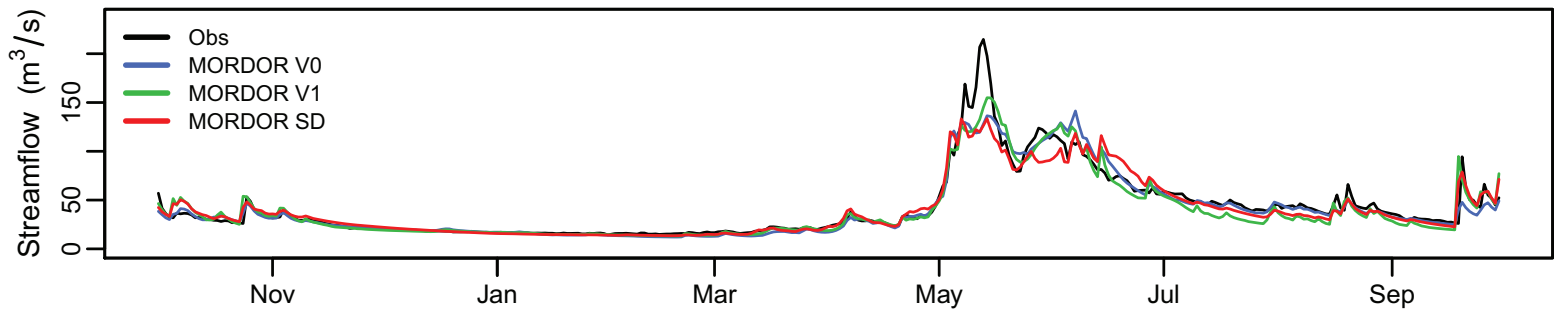

Year 2000

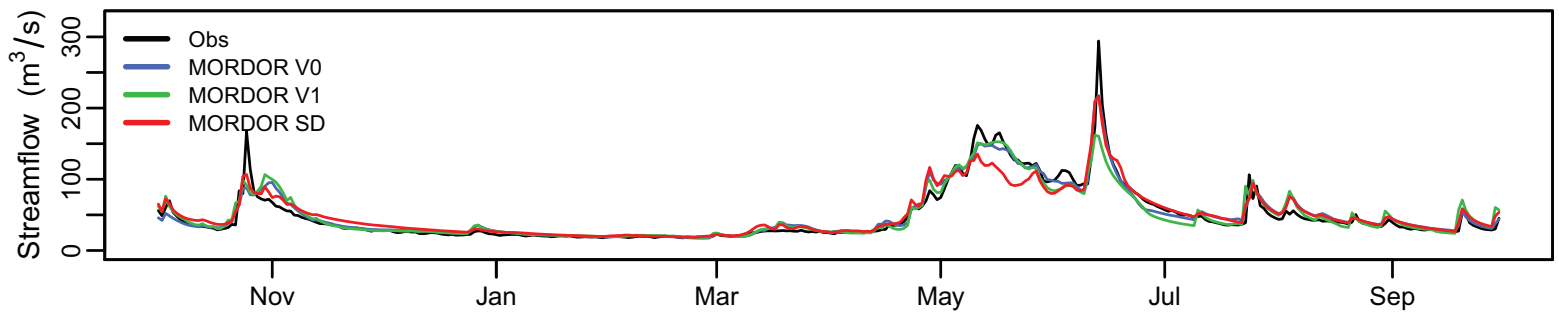



# Durance@Clapiere

Year 2001

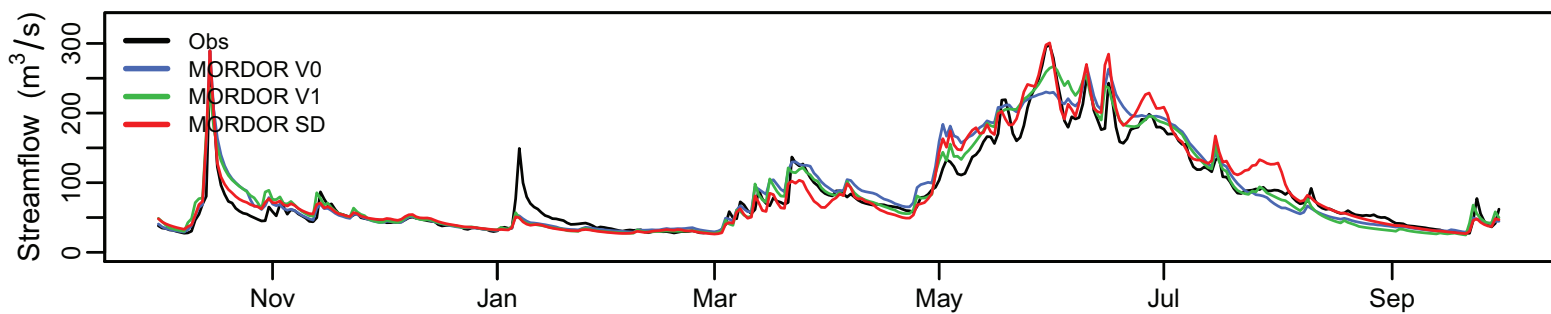

Year 2002

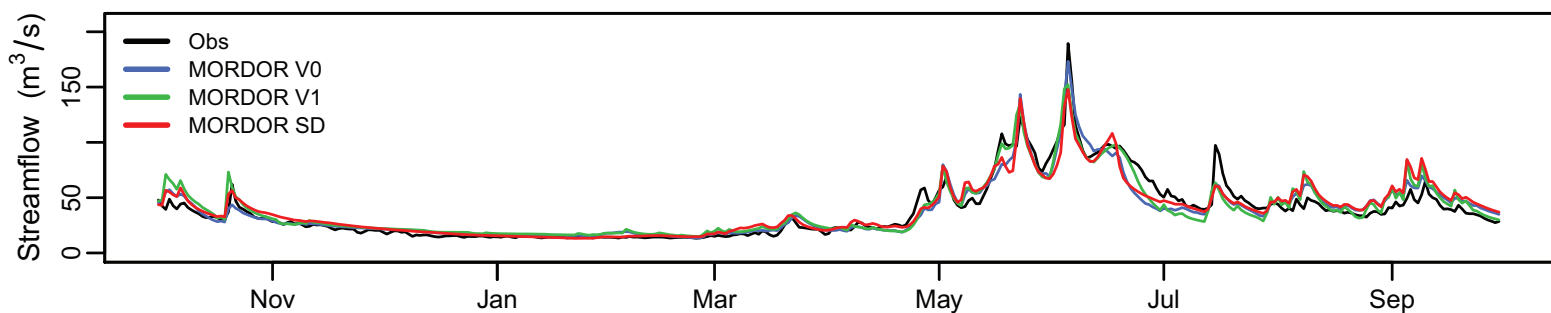

Year 2003

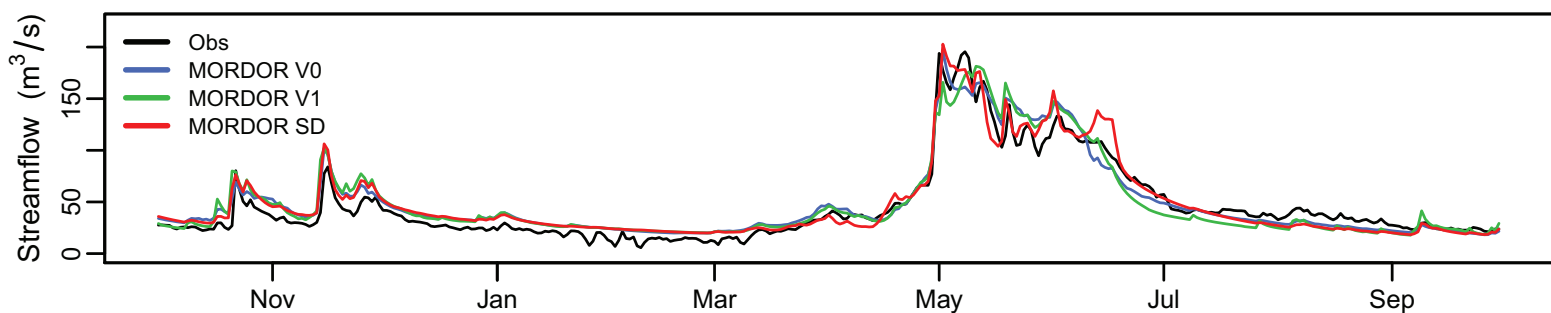

Year 2004

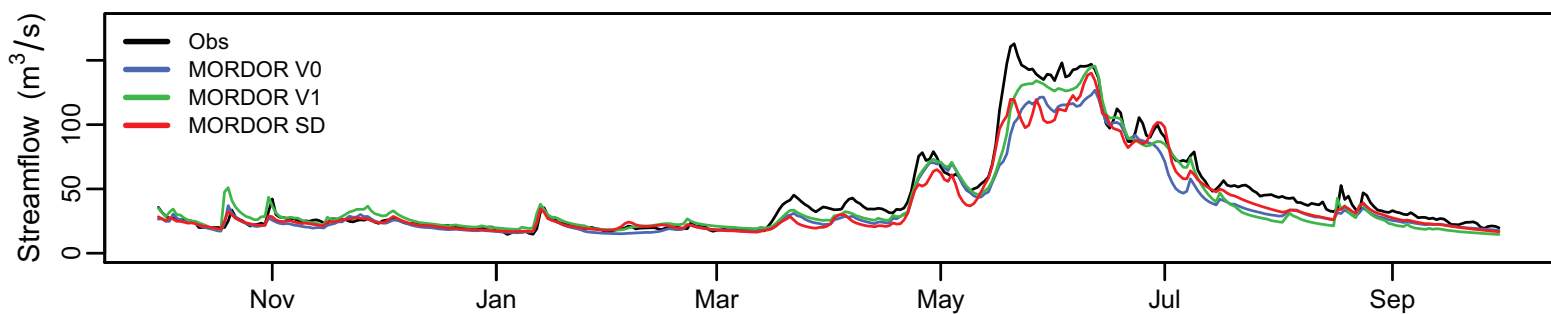

Year 2005

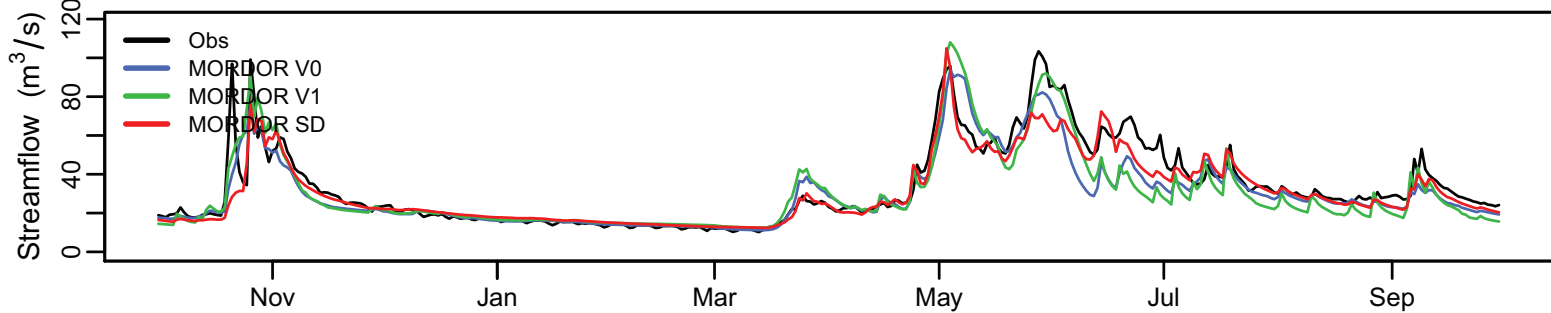

# Eyrieux@Pontpierre

Year 1999

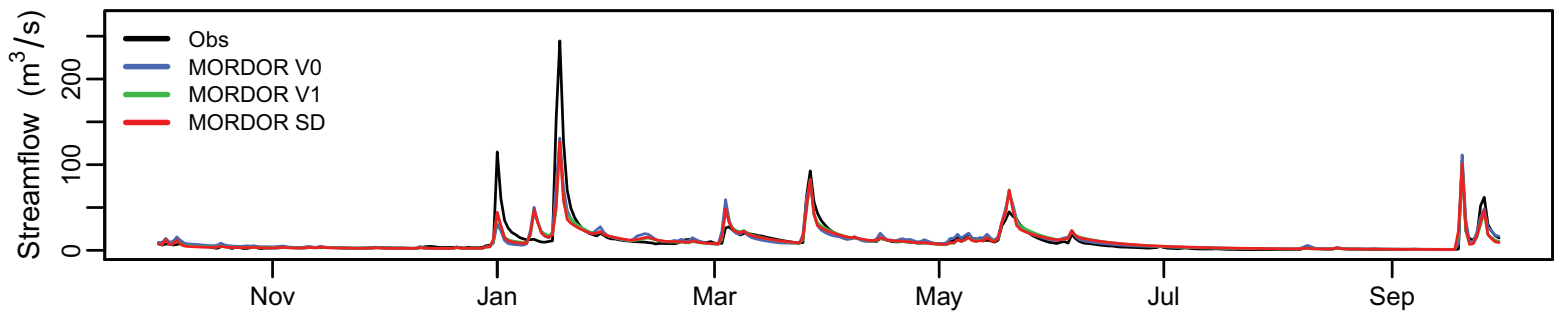

Year 2000

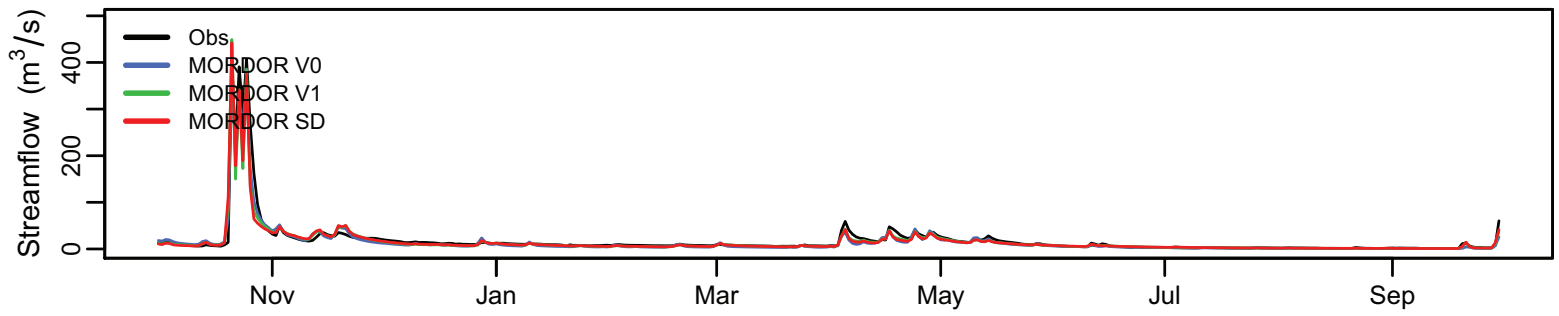

Year 2001

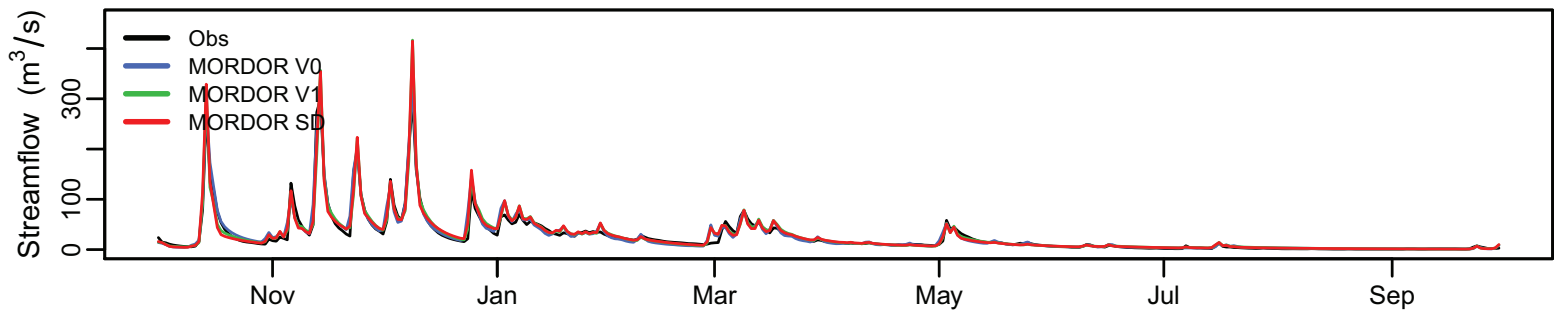

Year 2002

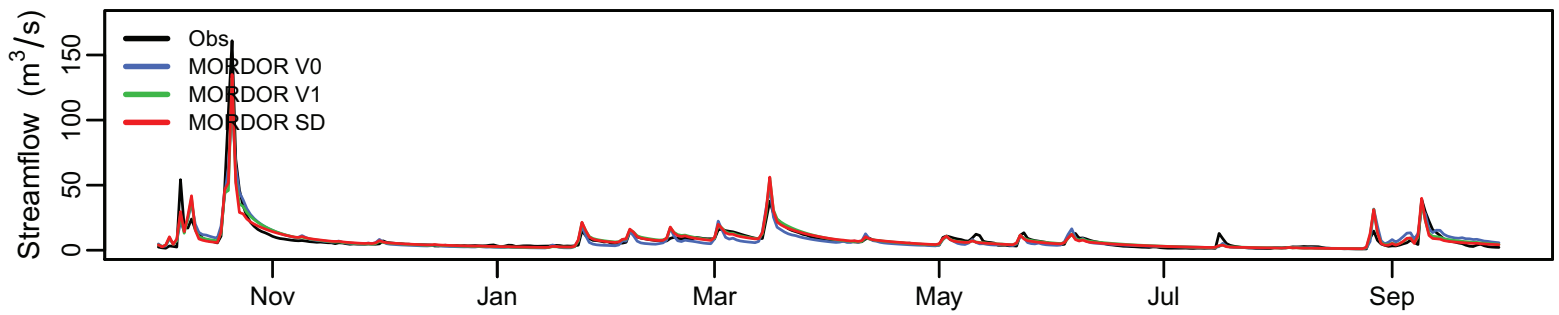

Year 2003

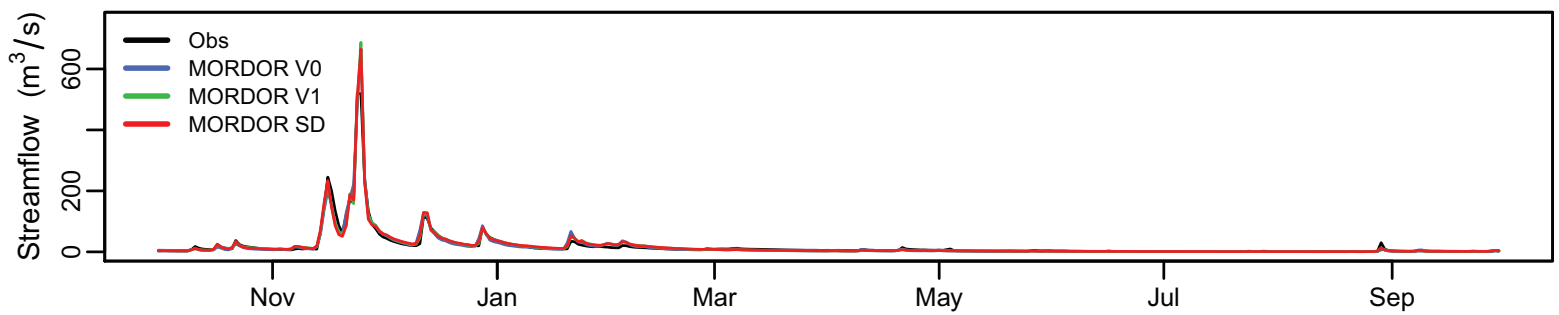

Year 2004

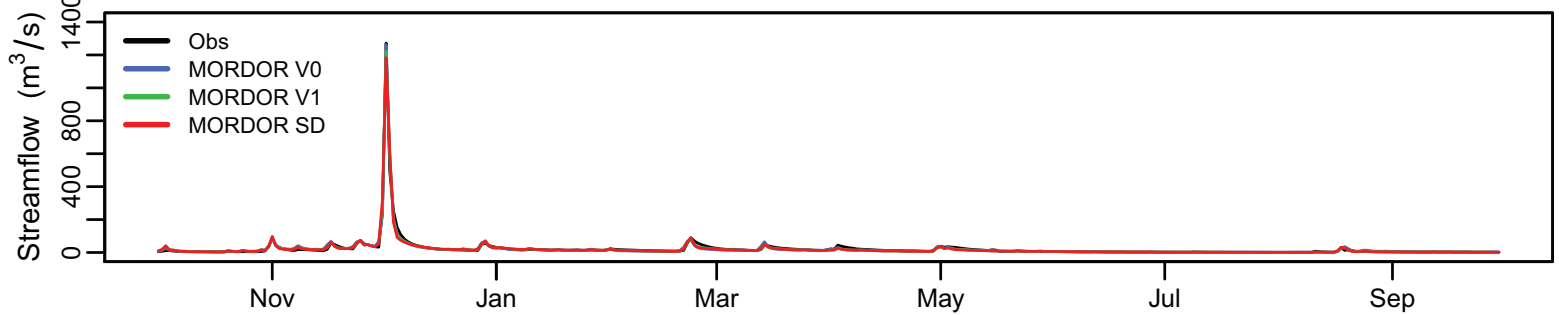

# Eyrieux@Pontpierre

Year 2005

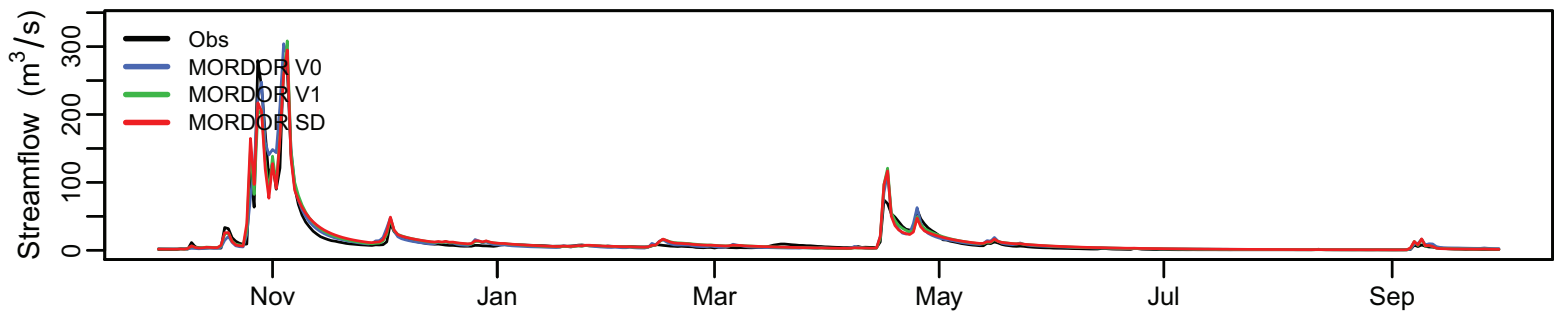

Year 2006

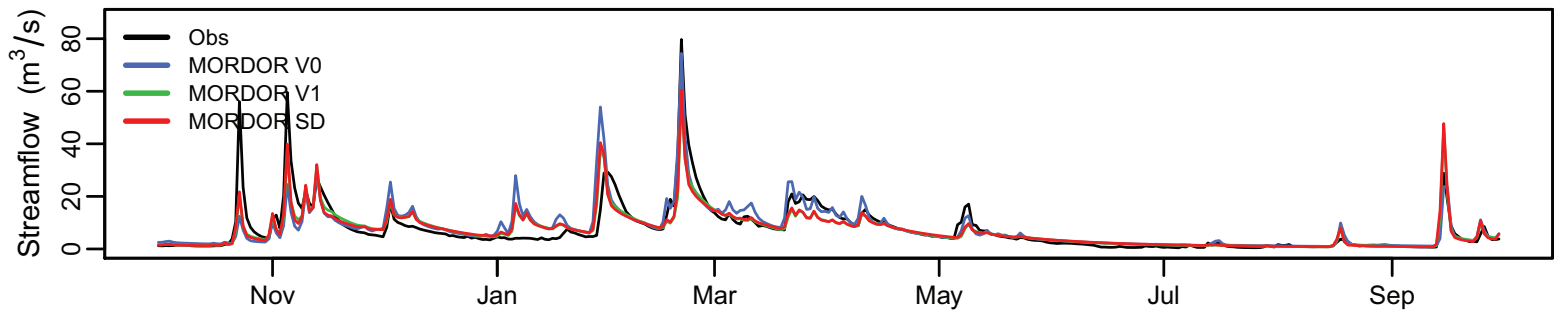

Year 2007

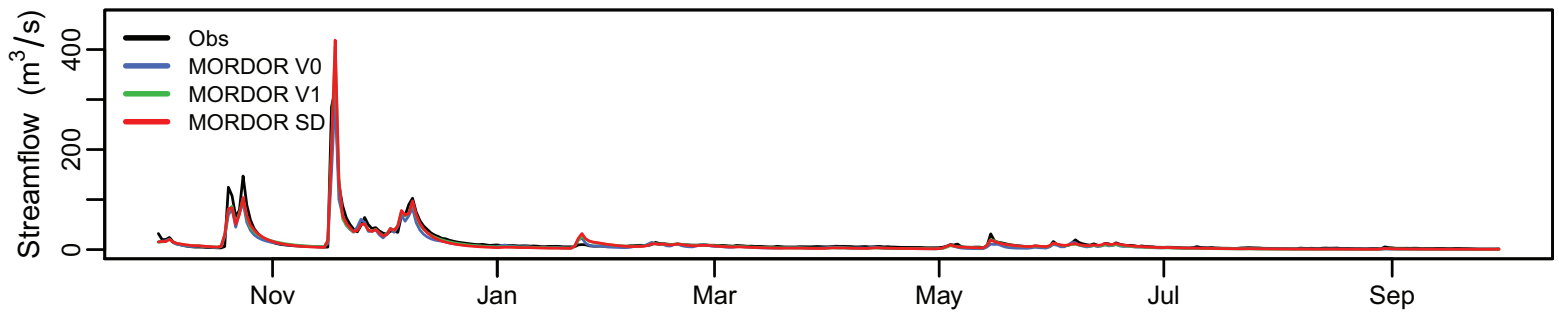

Year 2008

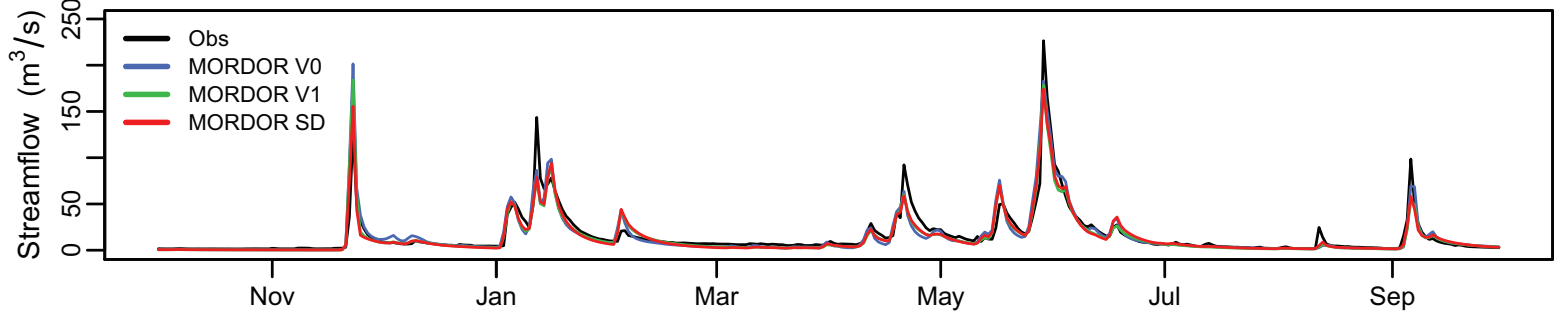

Year 2009

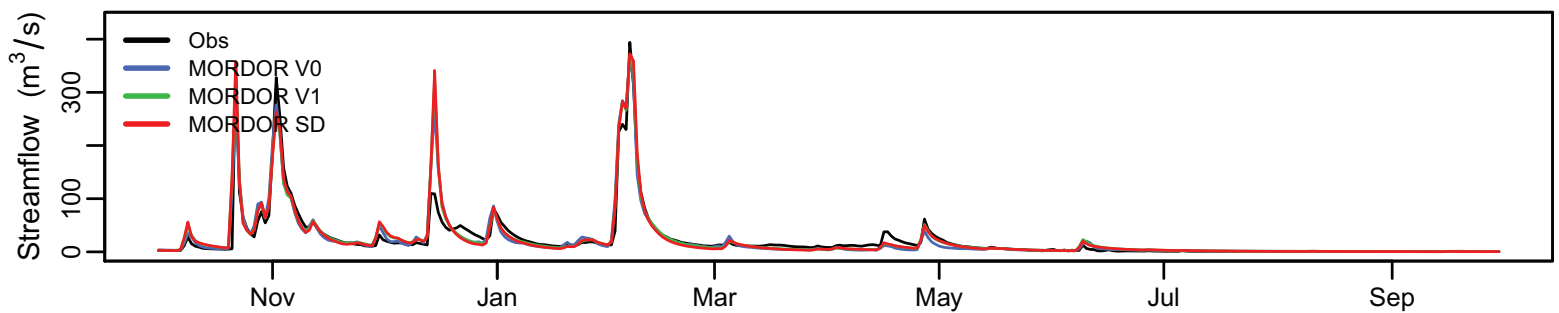

Year 2010

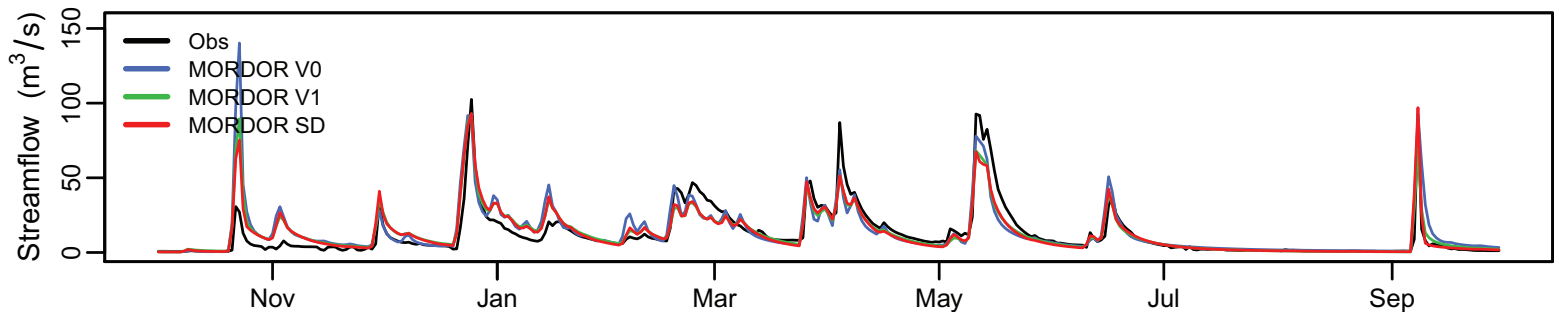

# Eyrieux@Pontpierre

Year 2011

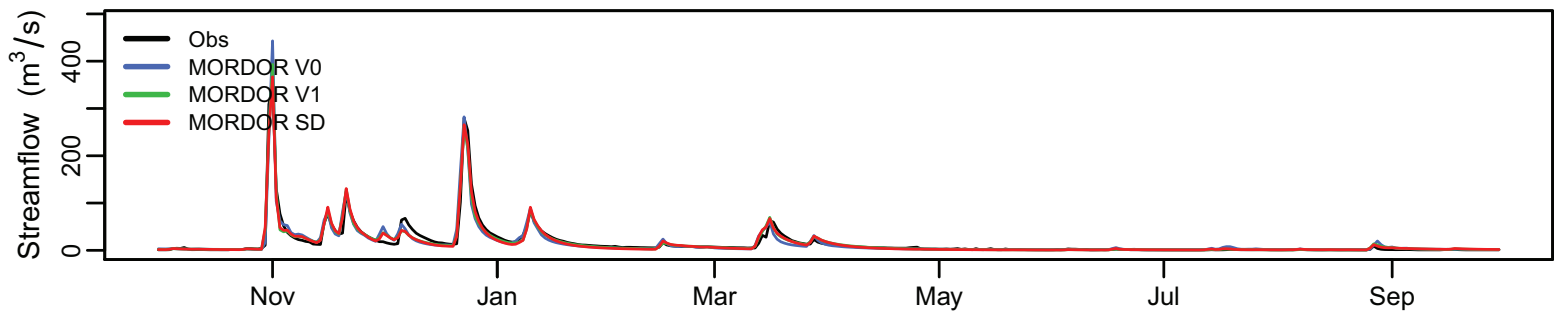

Year 2012

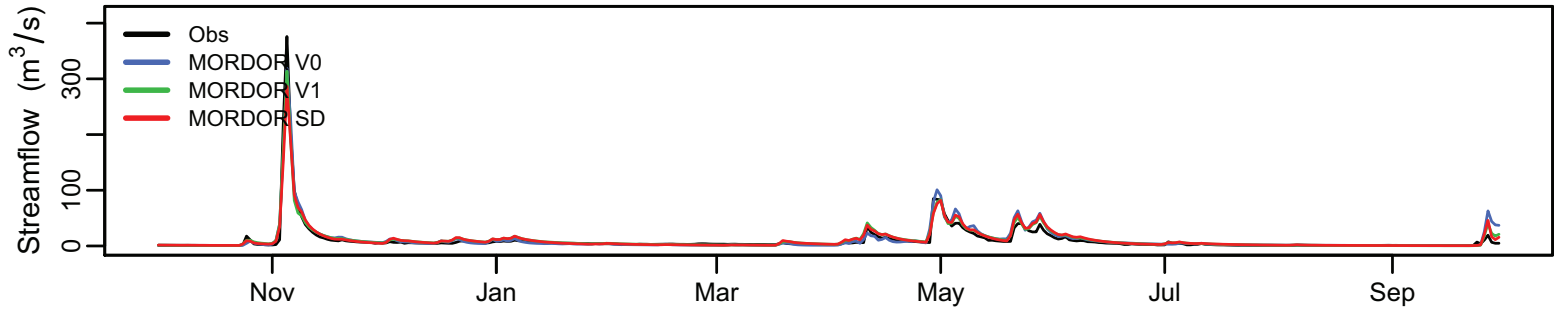

Year 2013

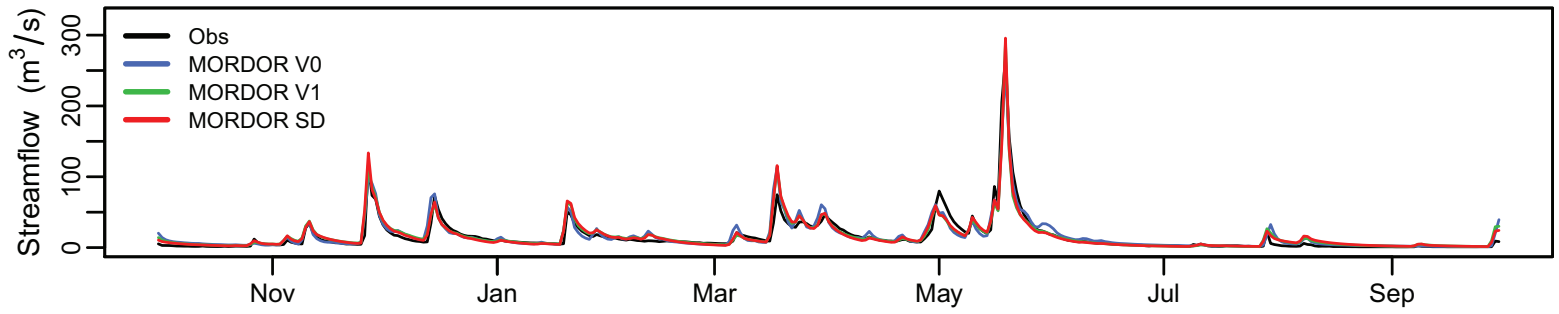

# Gage@Gagell

Year 1993

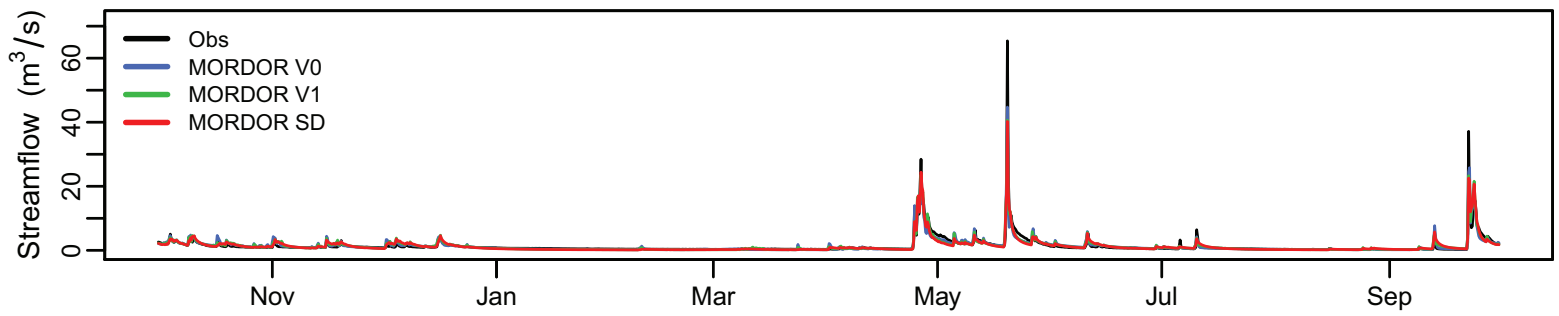

Year 1994

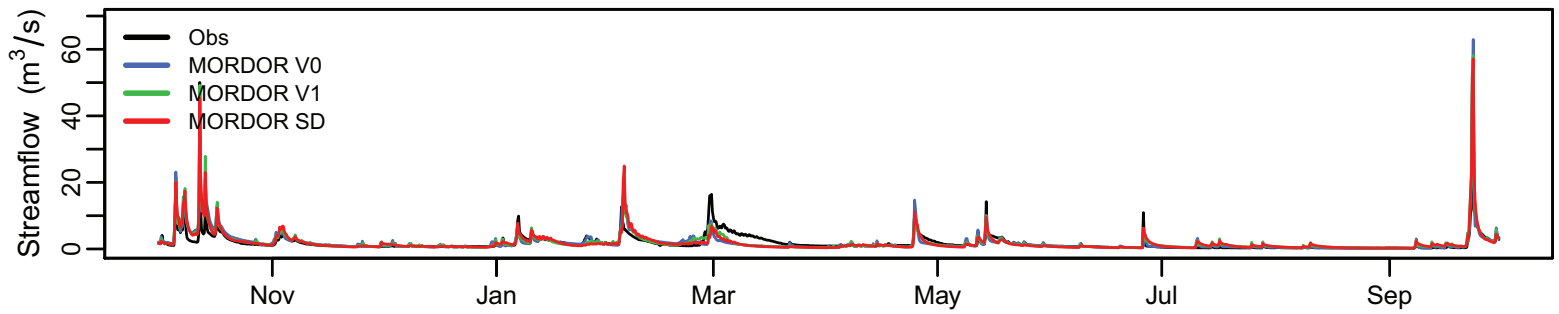

Year 1995

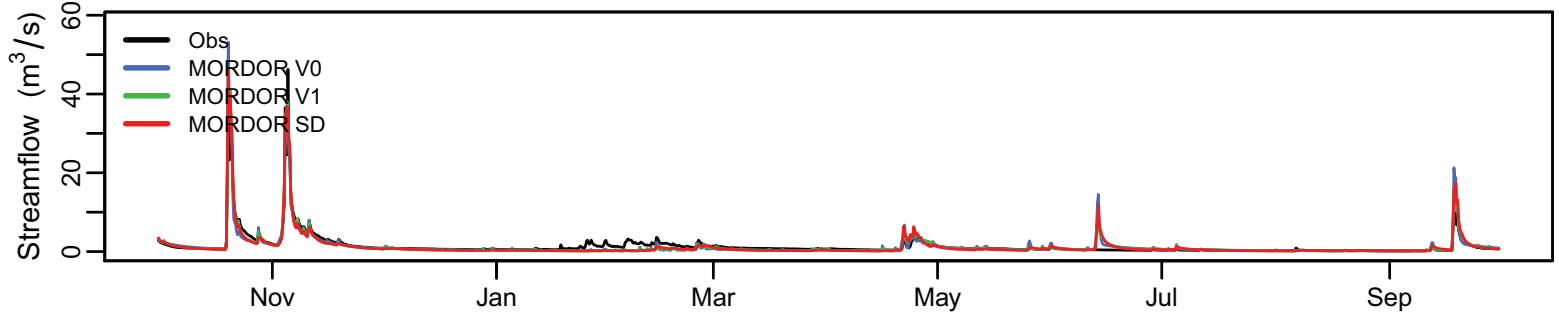

Year 1996

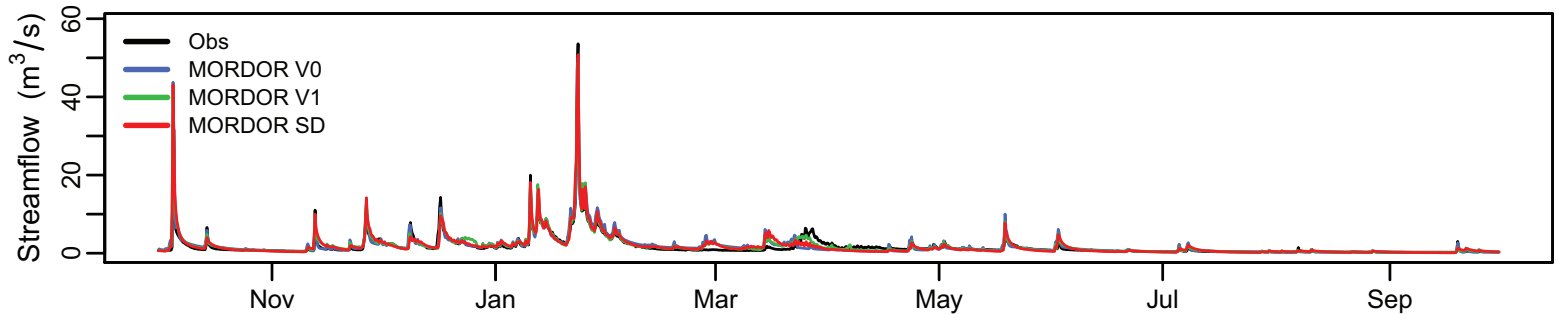

Year 1997

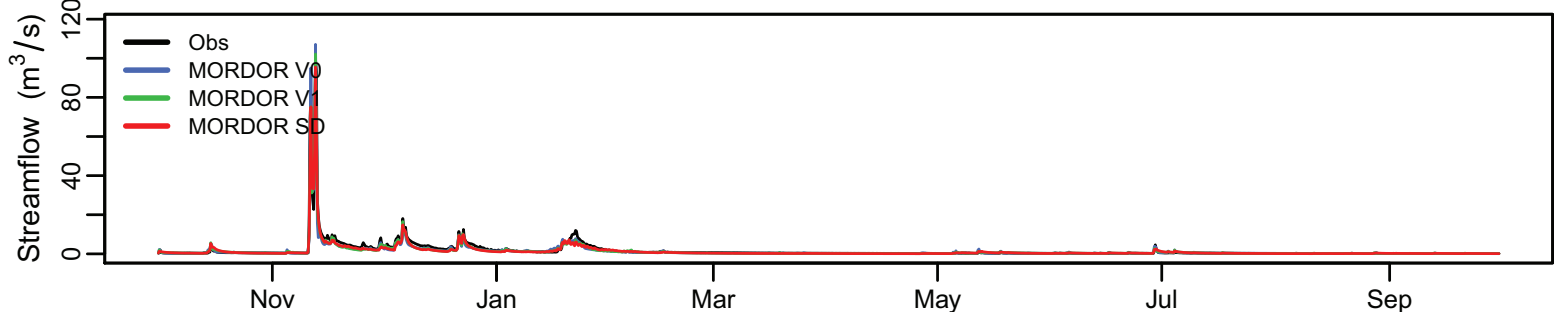

Year 1998

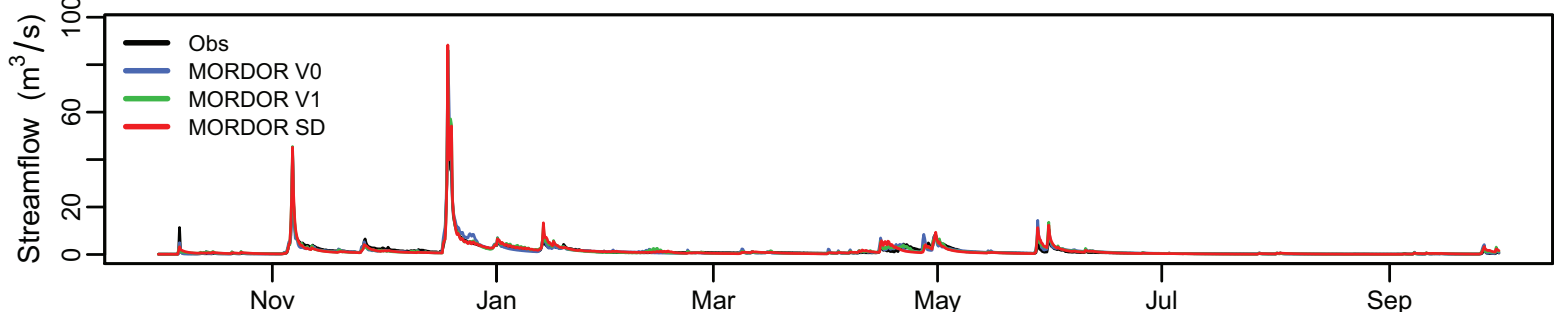

# Gage@Gagell

Year 1999

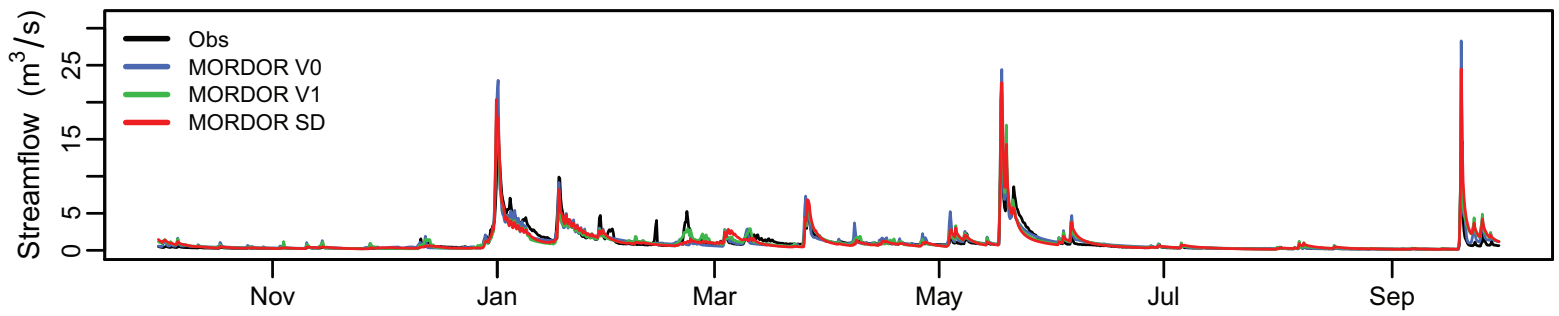

Year 2000

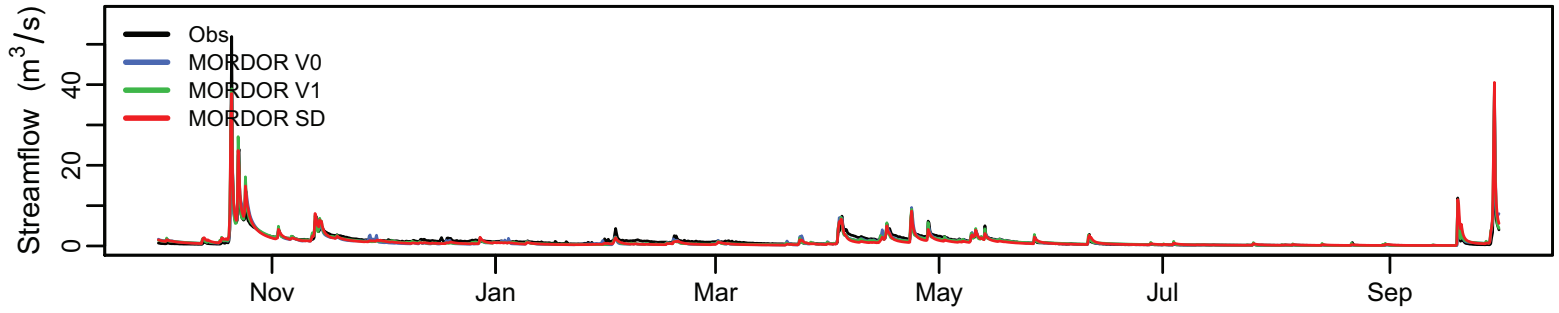

Year 2001

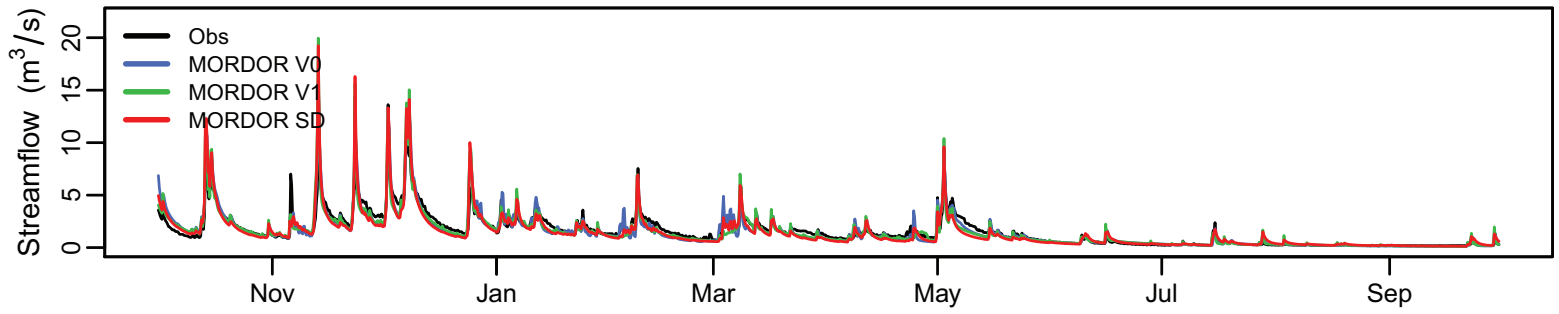

Year 2002

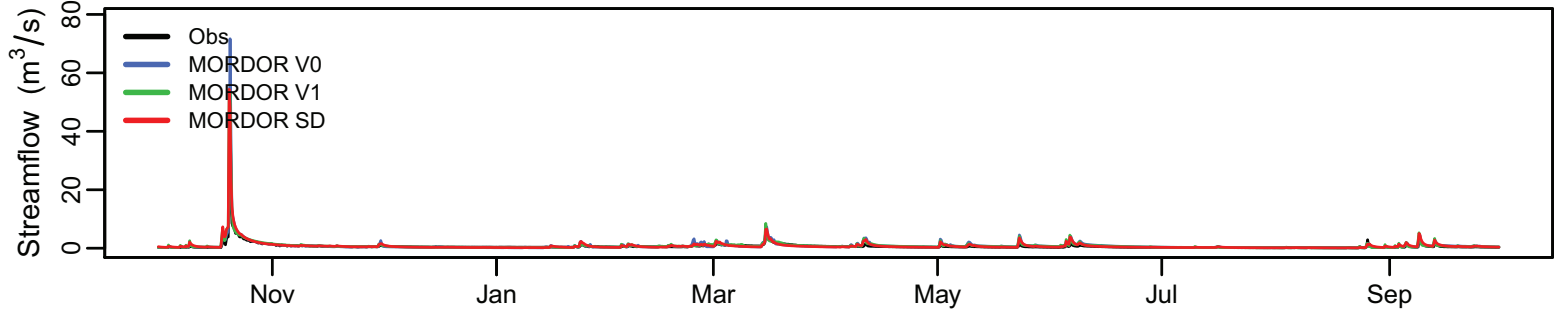

Year 2003

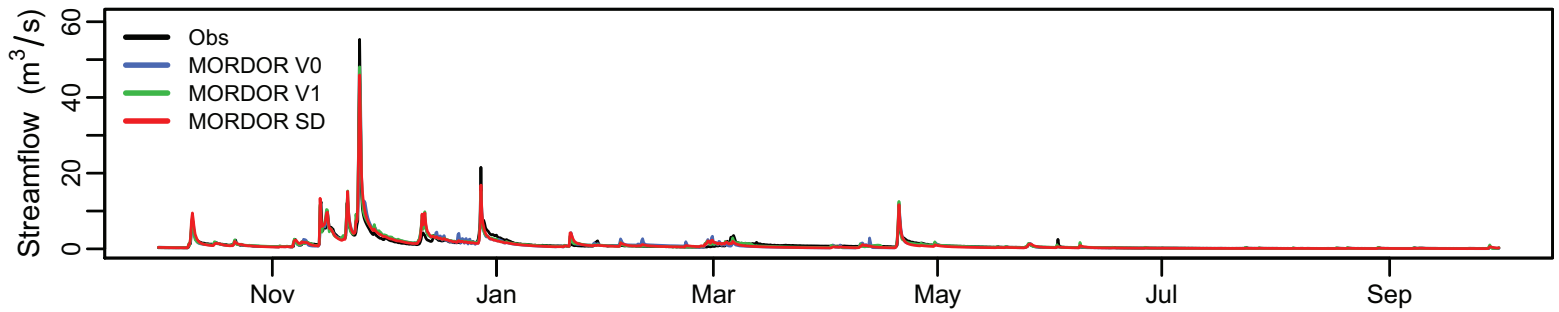

Year 2004

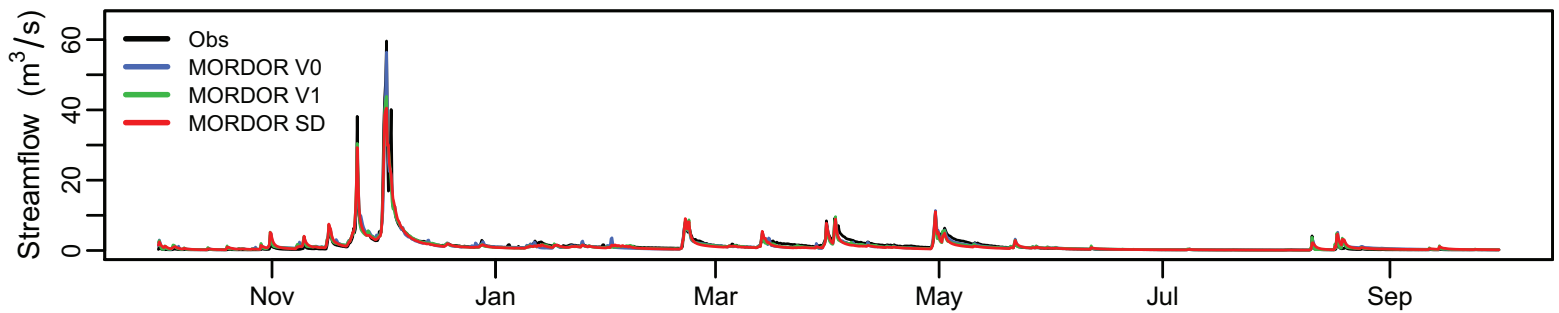

# Gage@Gagell

Year 2005

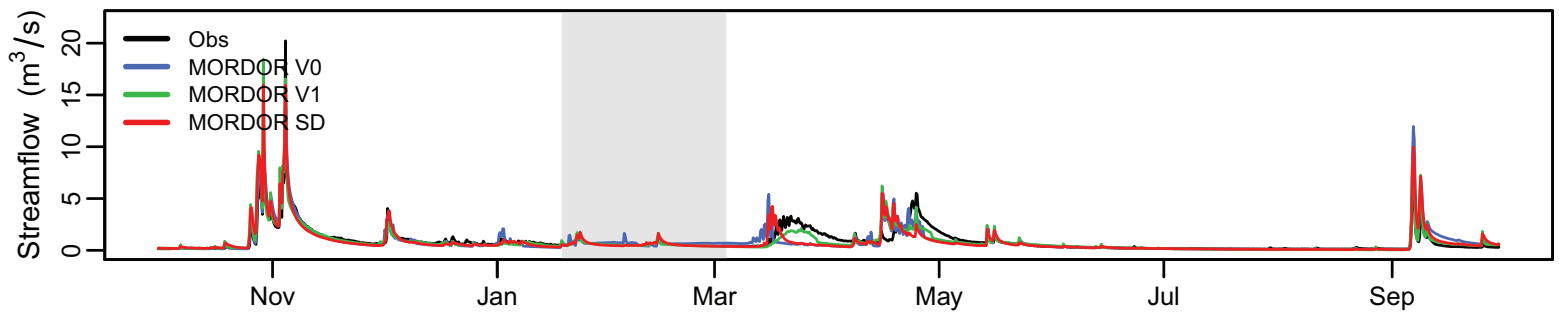

# Gardon@Corbes

Year 1987

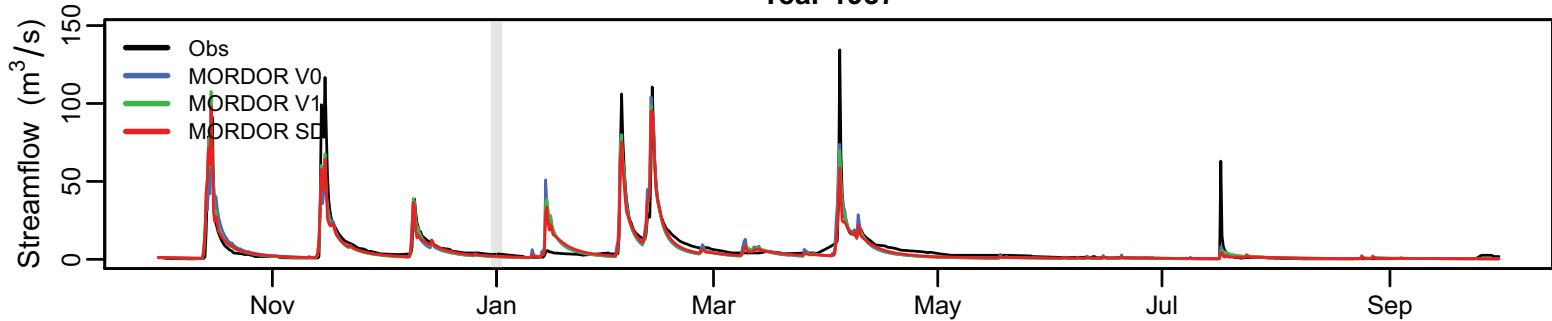

Year 1988

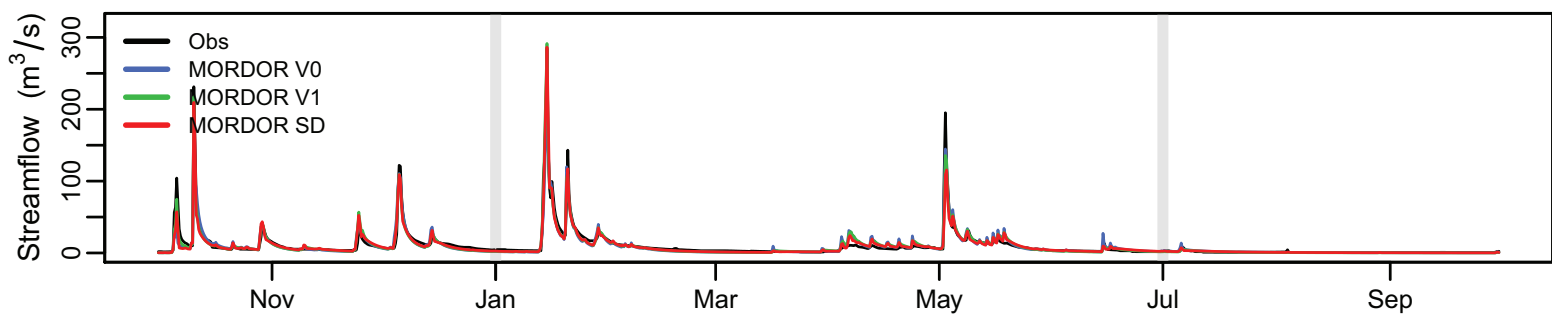

Year 1989

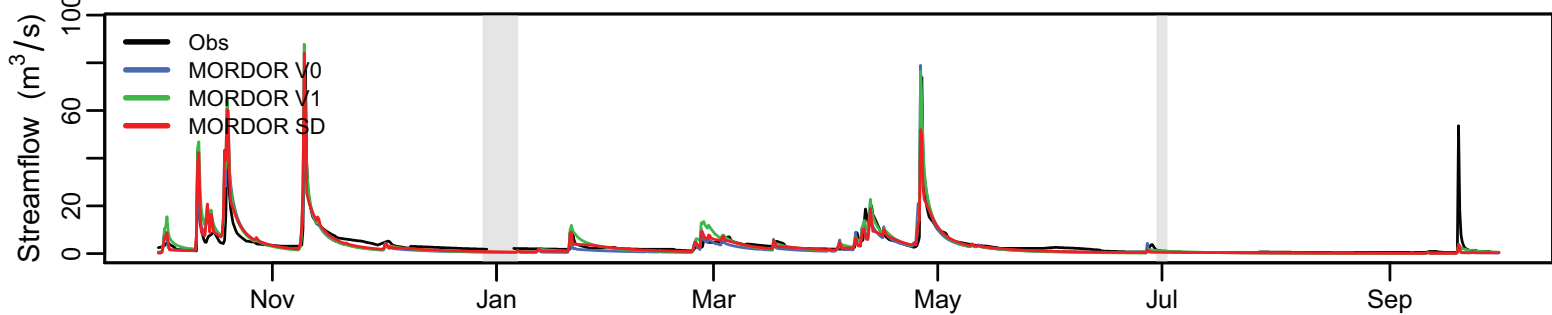

Year 1990

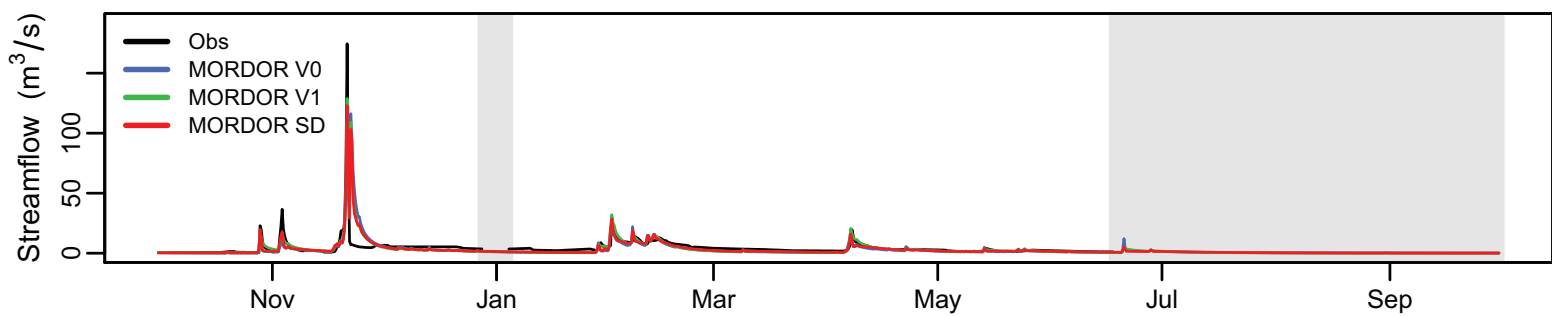

Year 1991

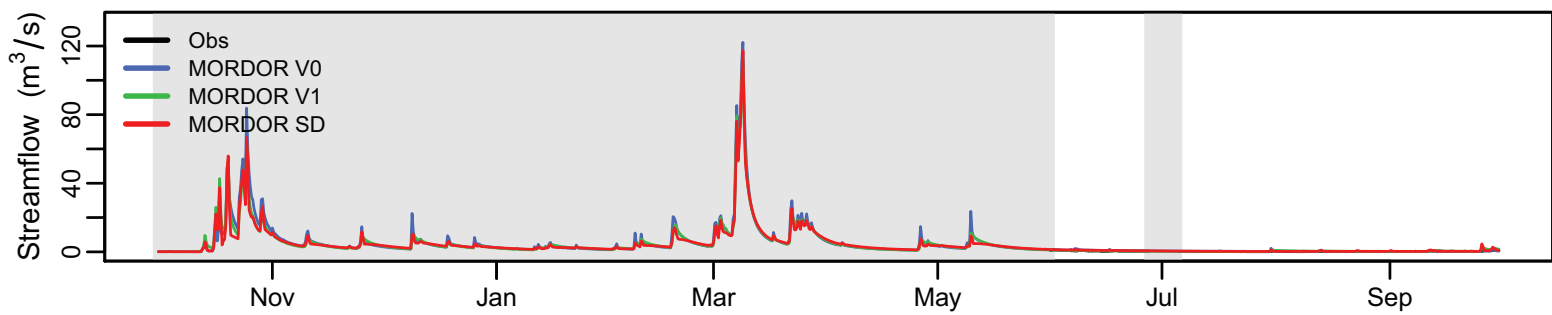

Year 1992

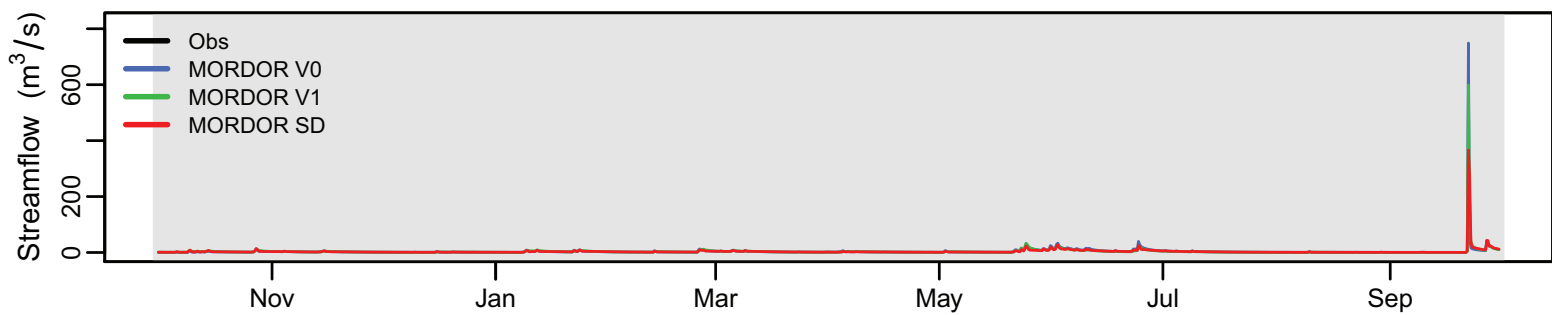



# Gardon@Corbes

Year 1993

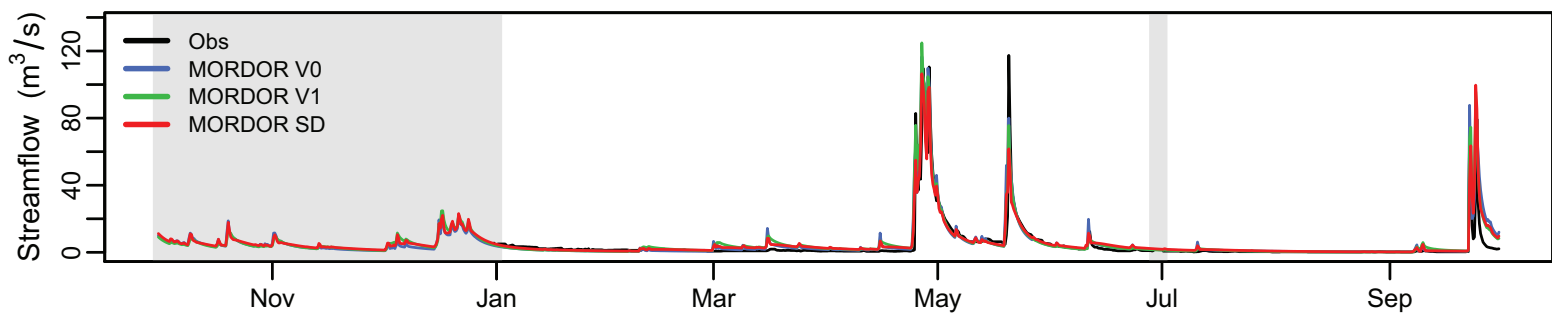

Year 1994

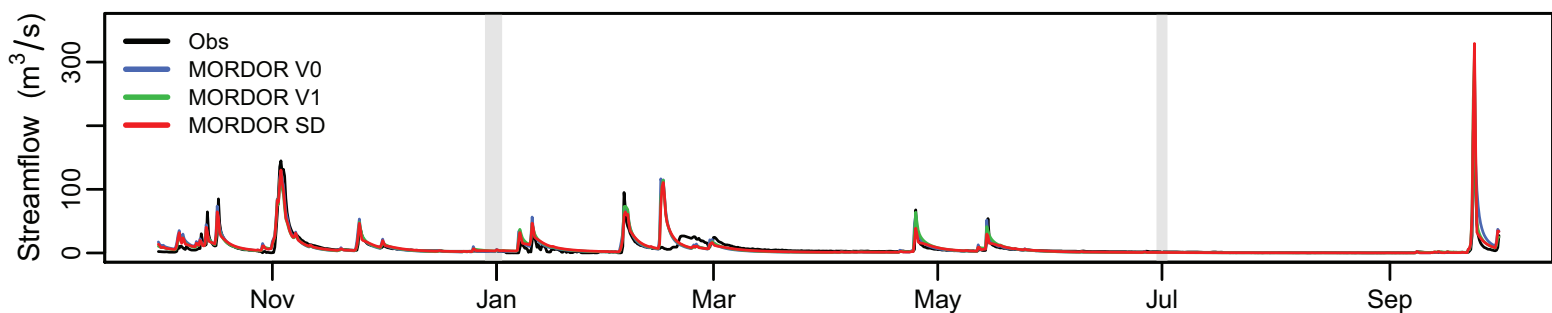

Year 1995

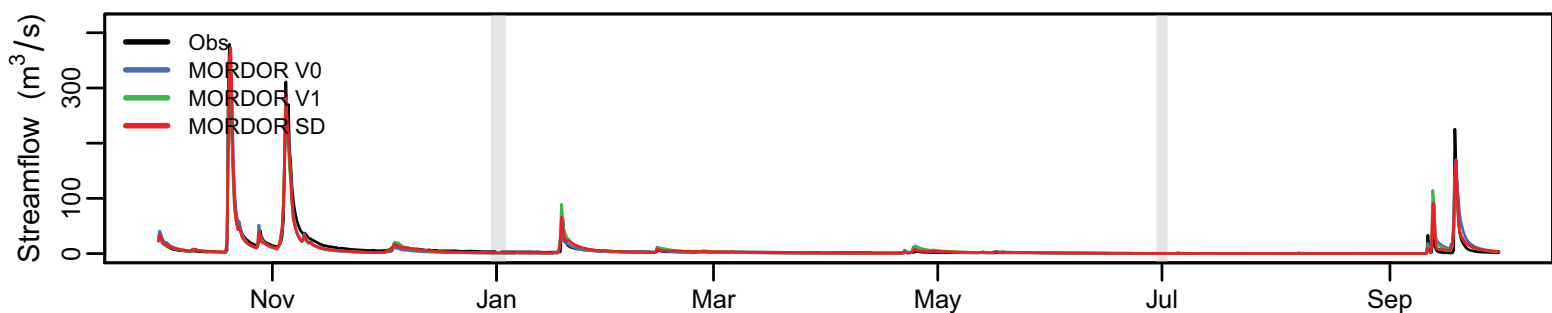

Year 1996

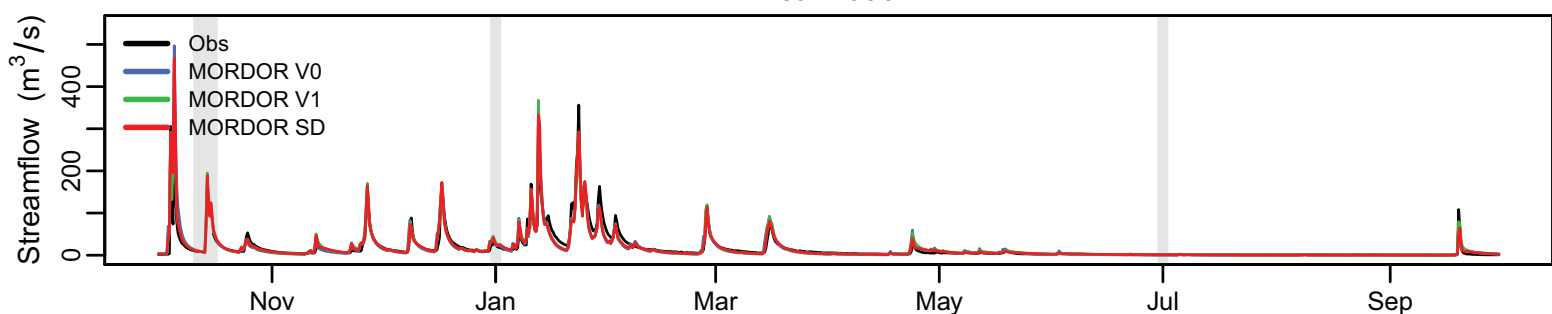

Year 1997

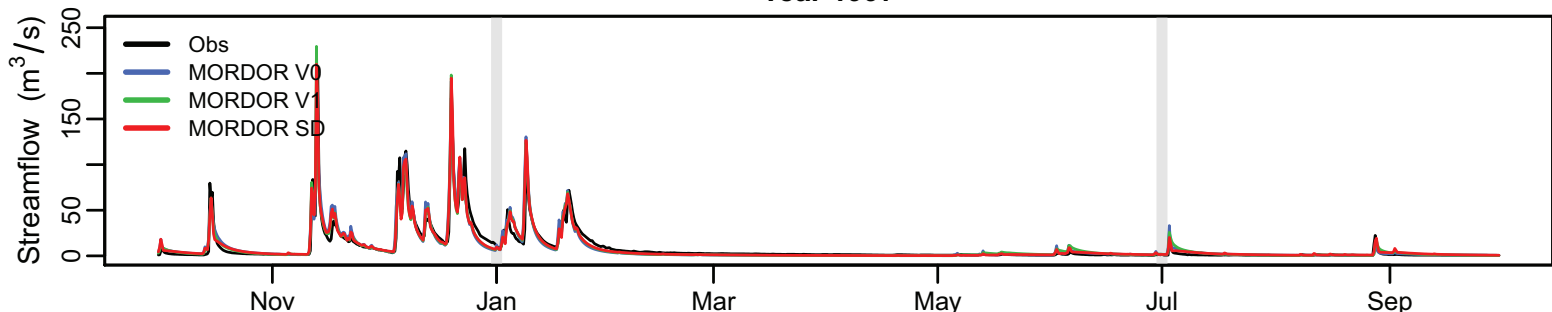

Year 1998

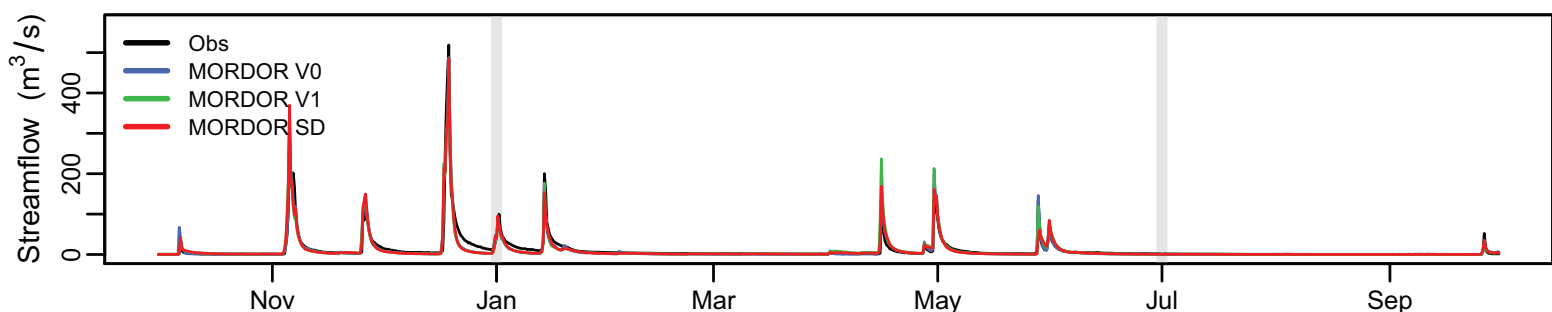

# Gardon@Corbes

Year 1999

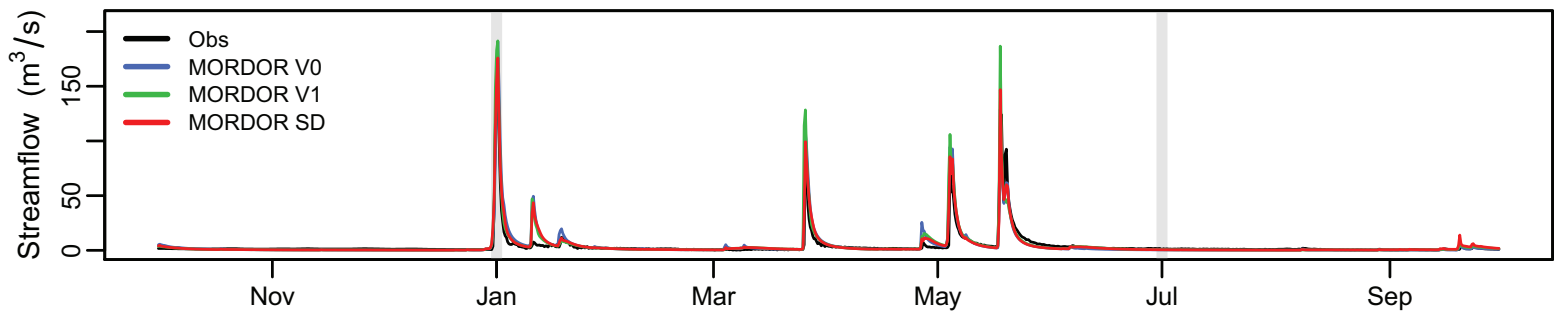

Year 2000

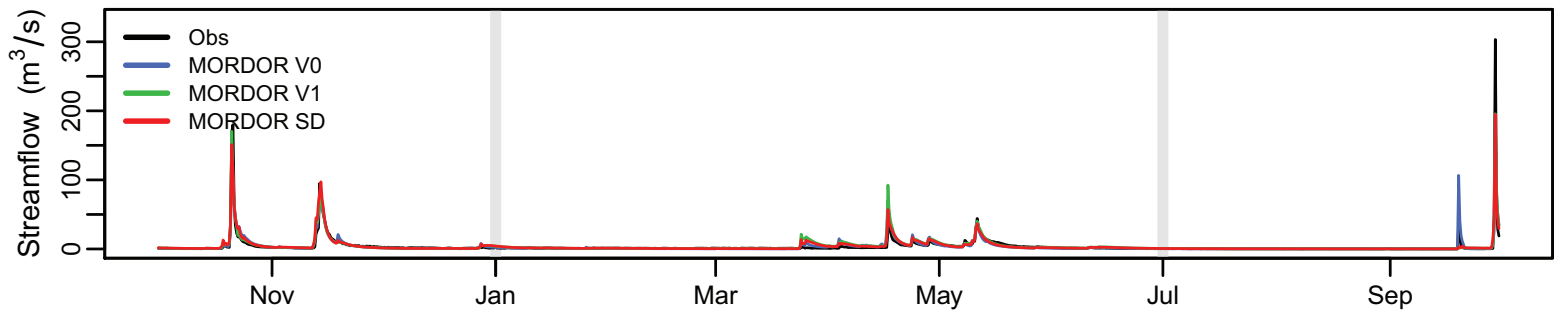

Year 2001

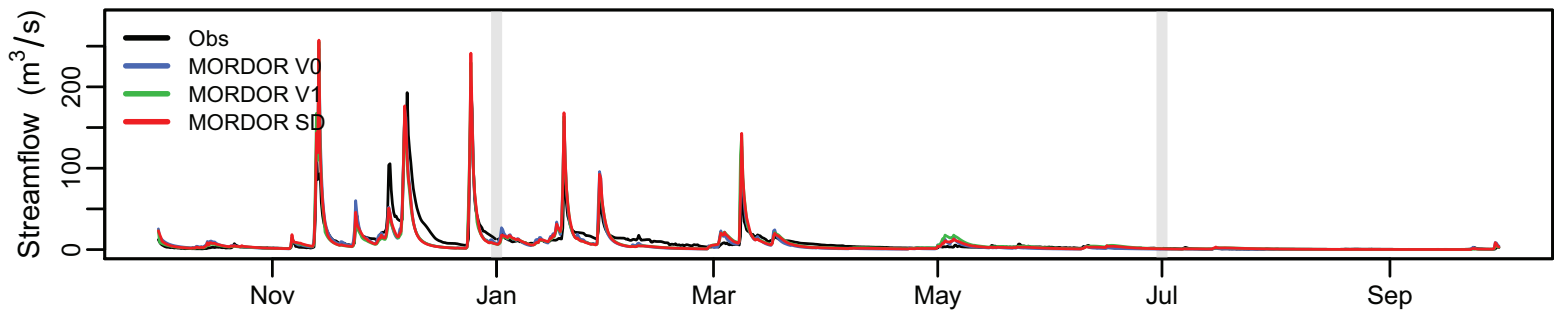

Year 2002

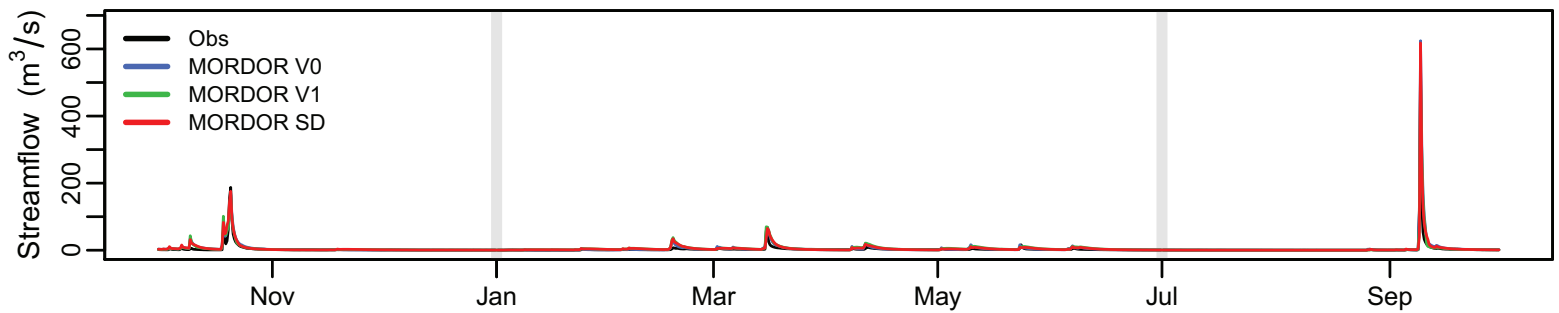

Year 2003

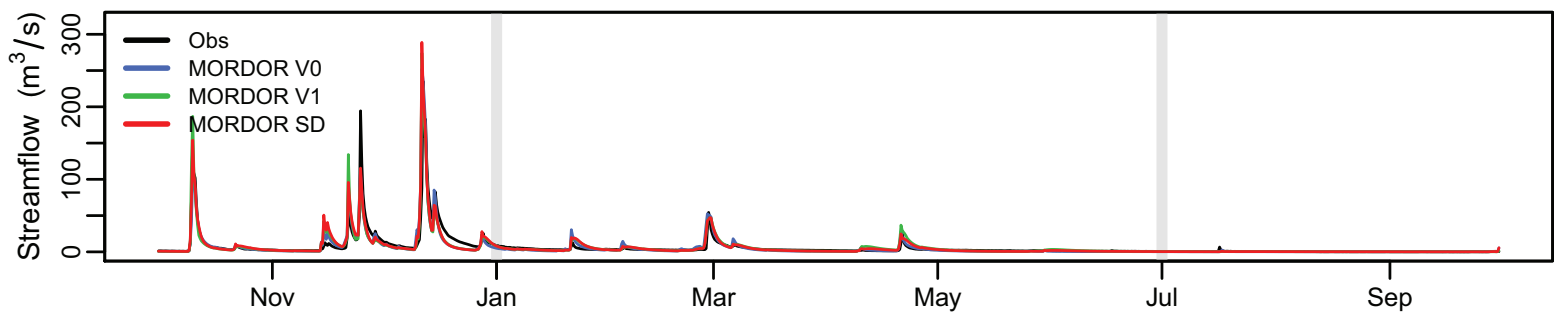

Year 2004

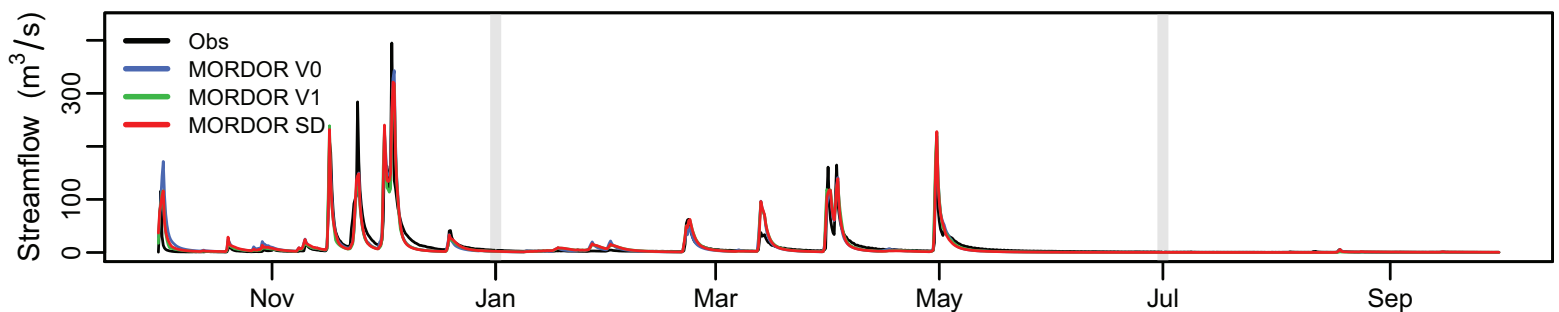

# Gardon@Corbes

Year 2005

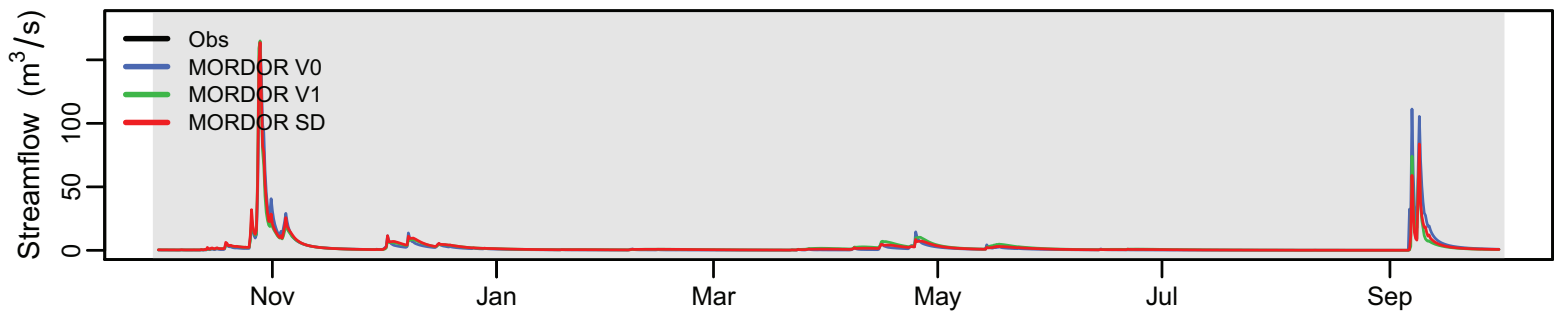

Year 2006

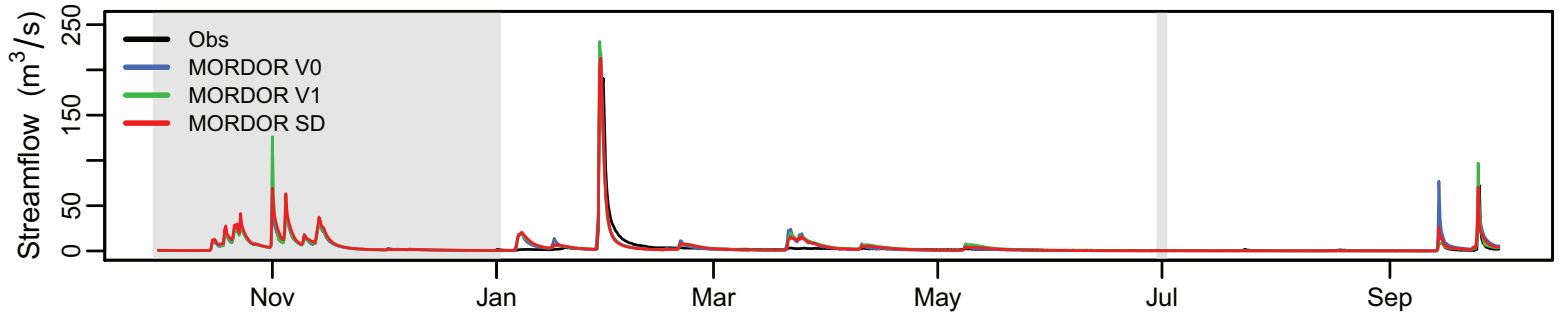

Year 2007

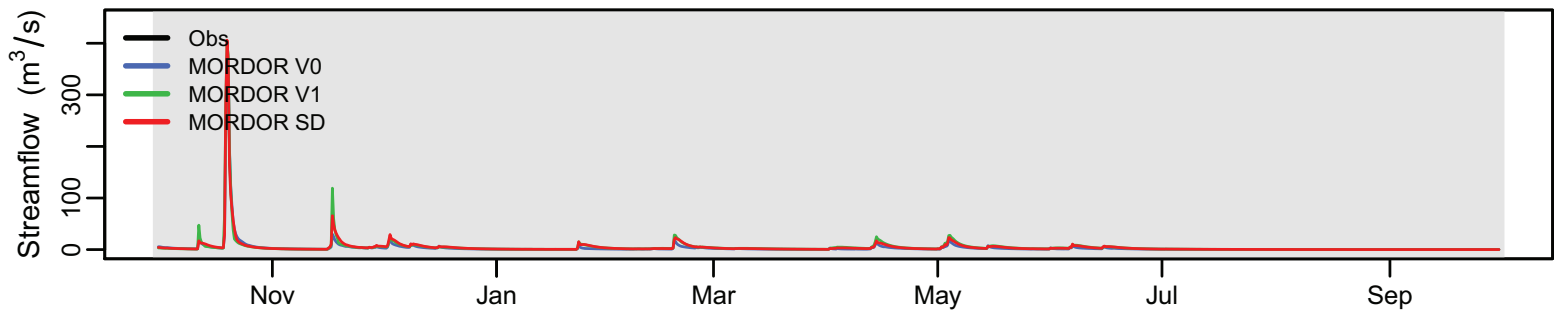

# Gardon@Generargues

Year 1987

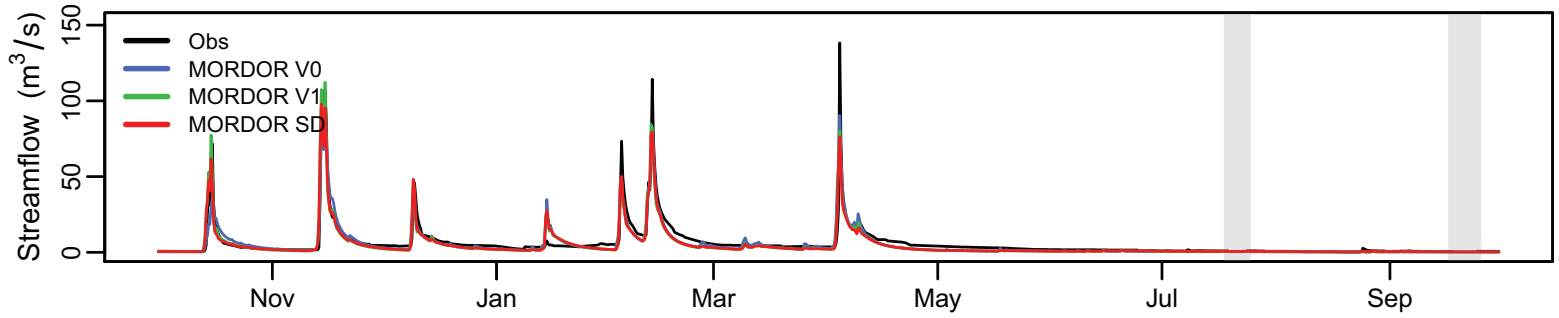

Year 1988

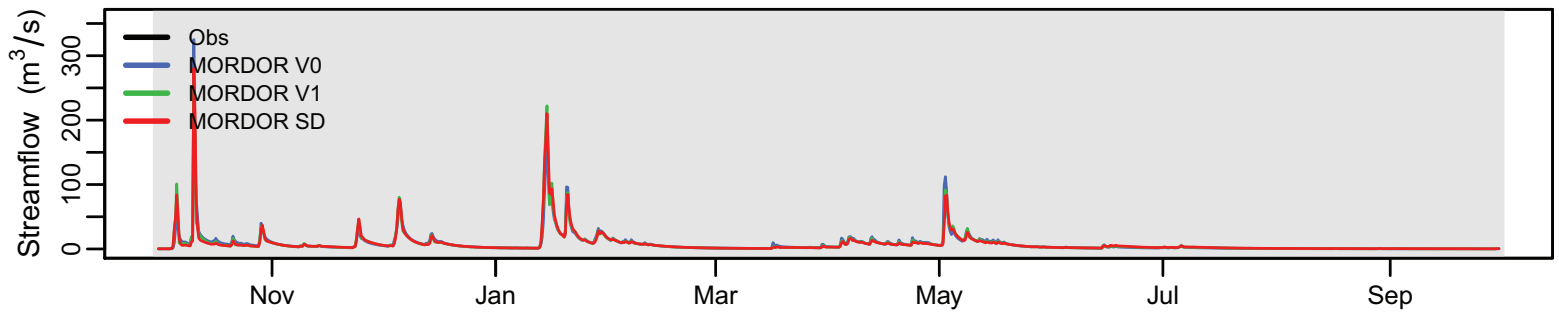

Year 1989

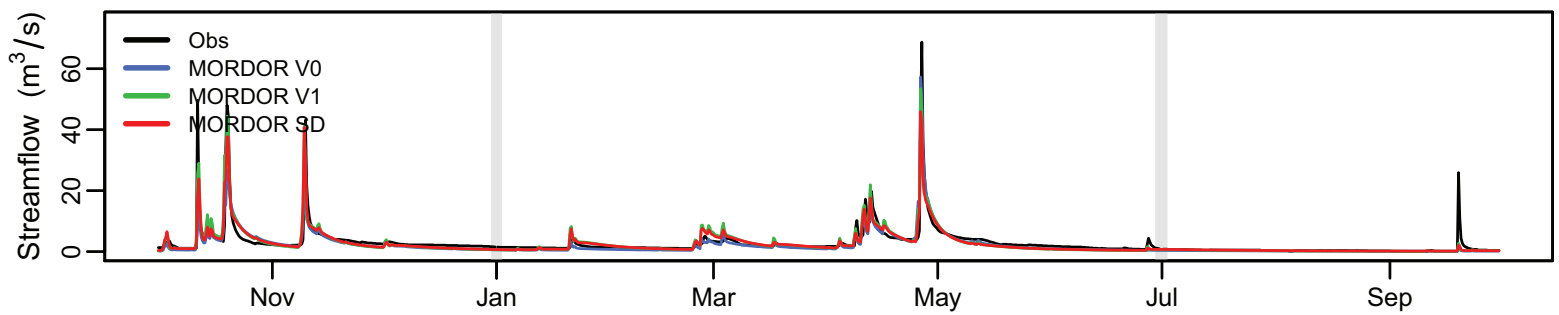

Year 1990

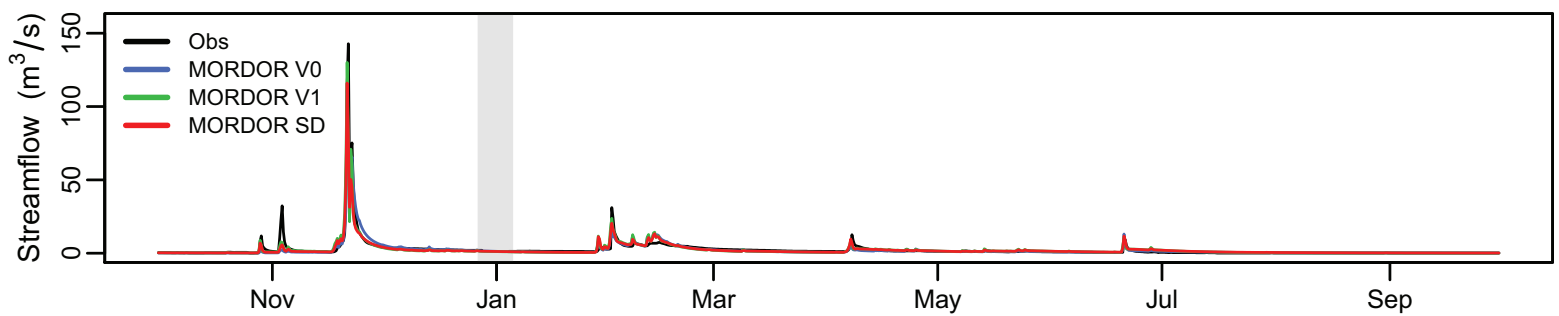

Year 1991

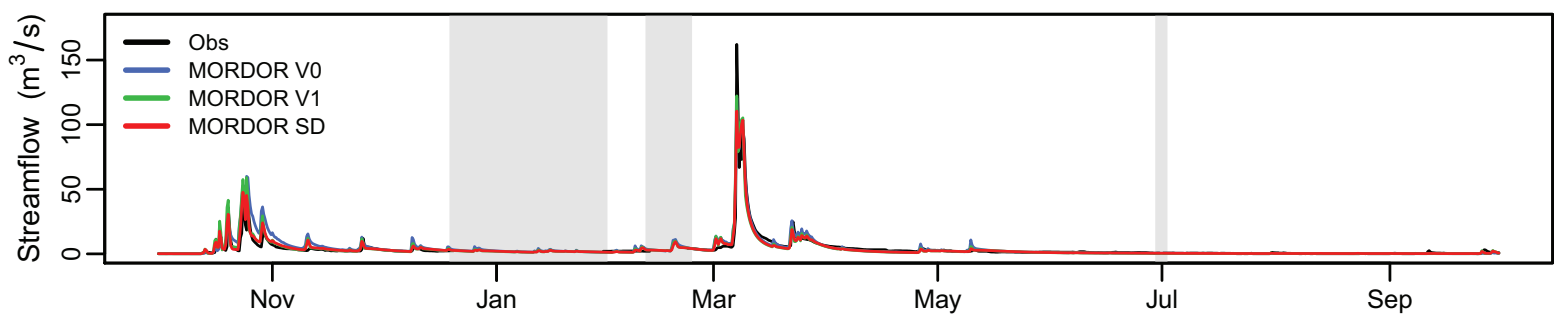

Year 1992

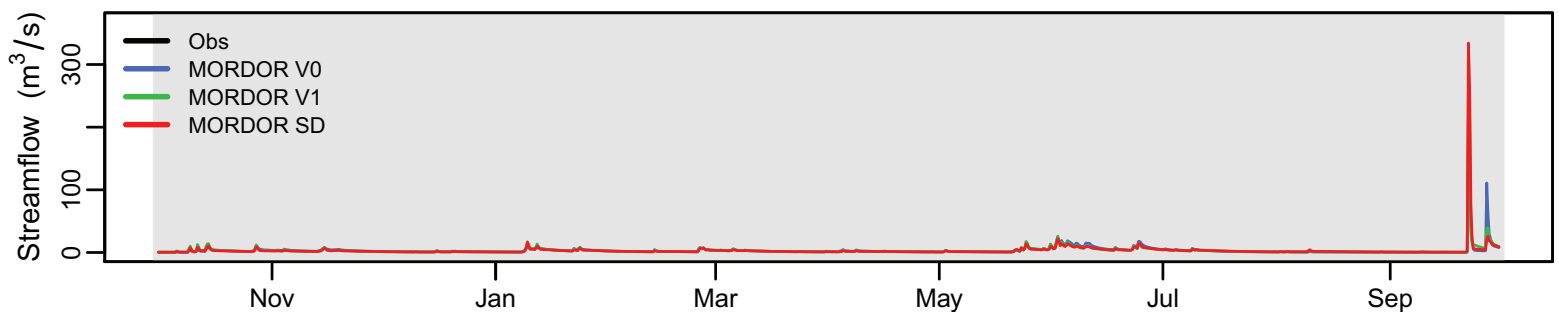

# Gardon@Generargues

Year 1993

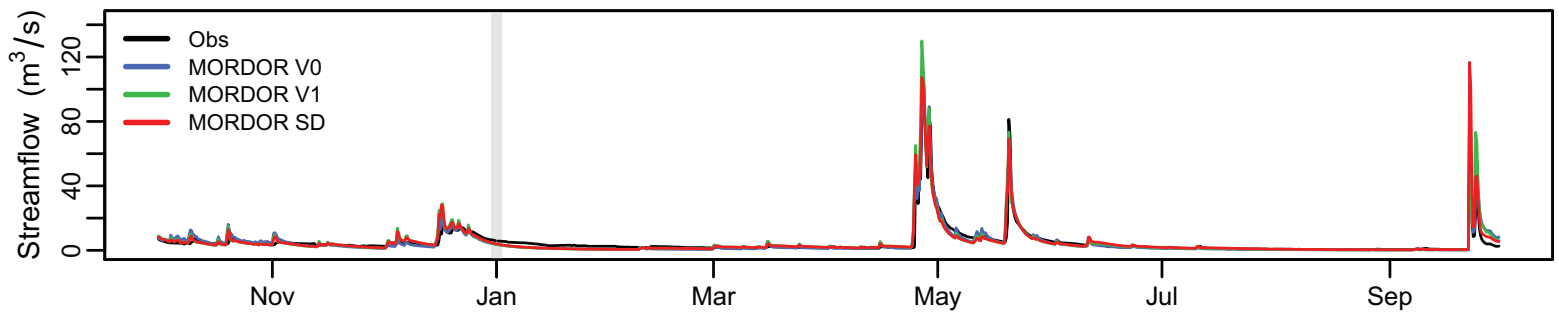

Year 1994

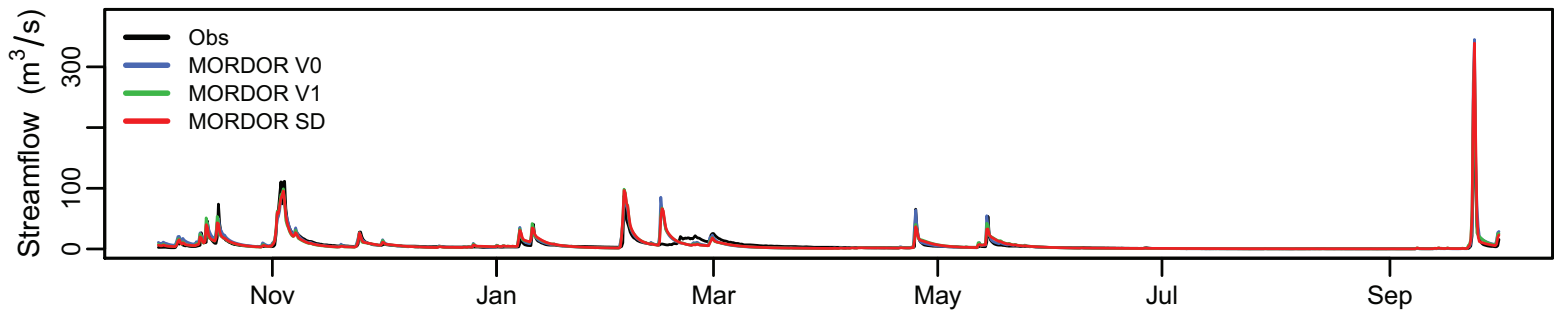

Year 1995

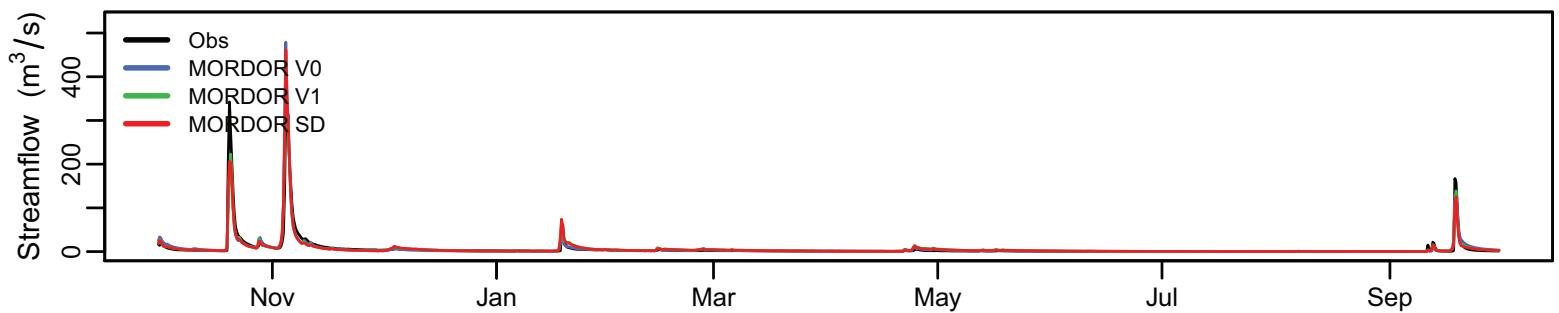

Year 1996

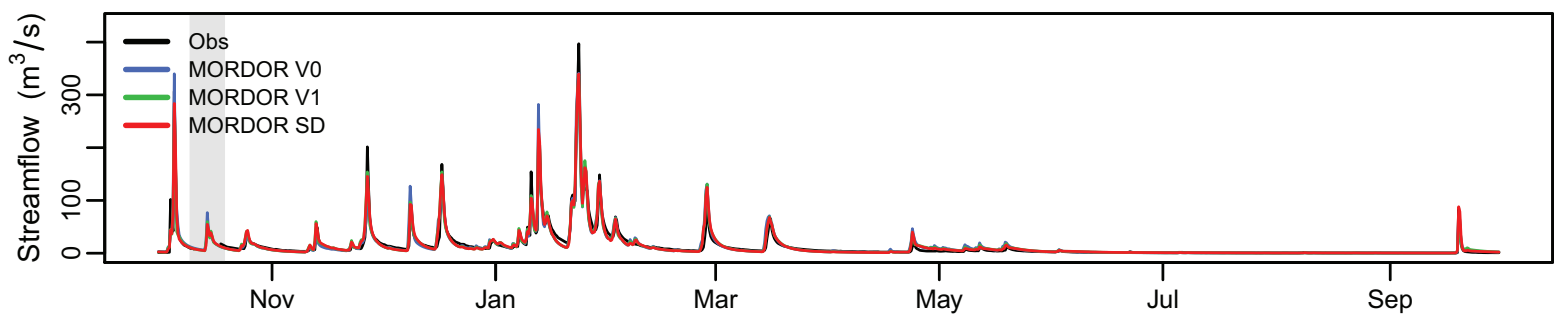

Year 1997

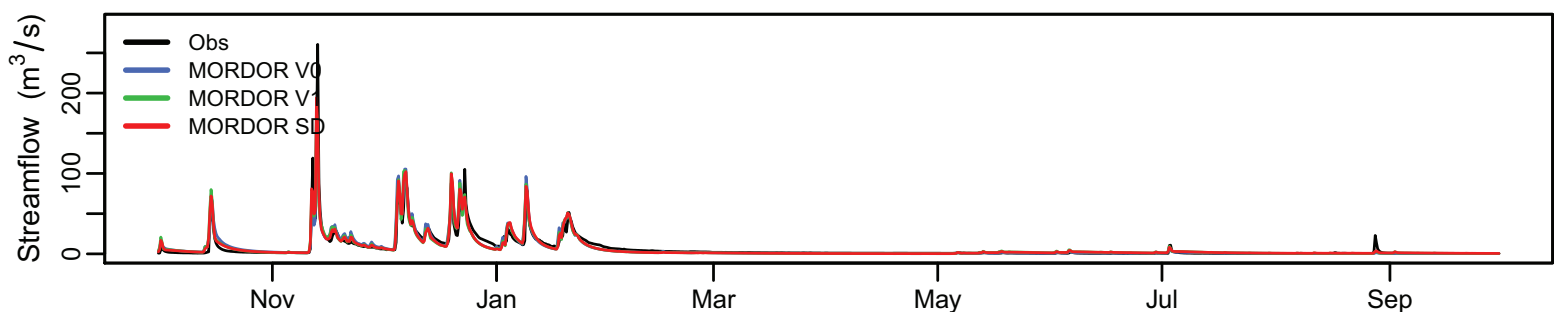

Year 1998

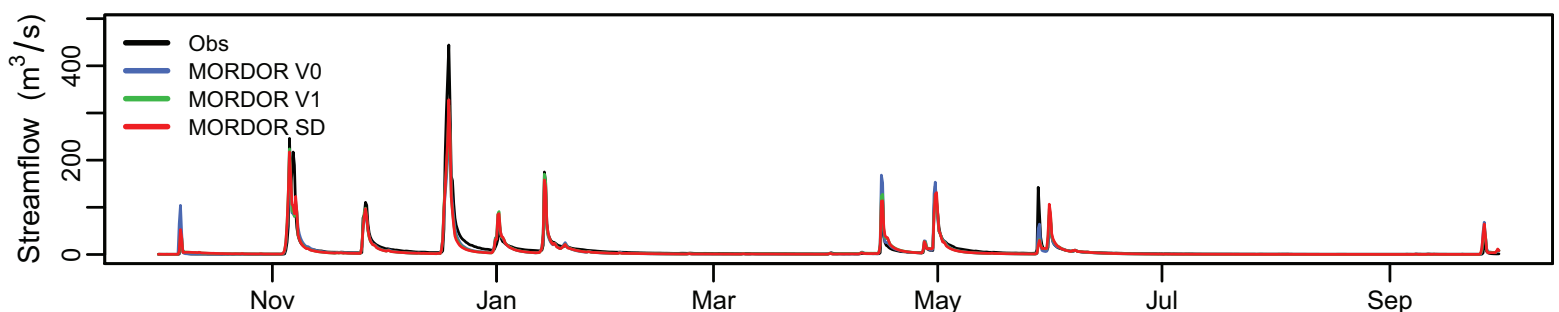

# Gardon@Generargues

Year 1999

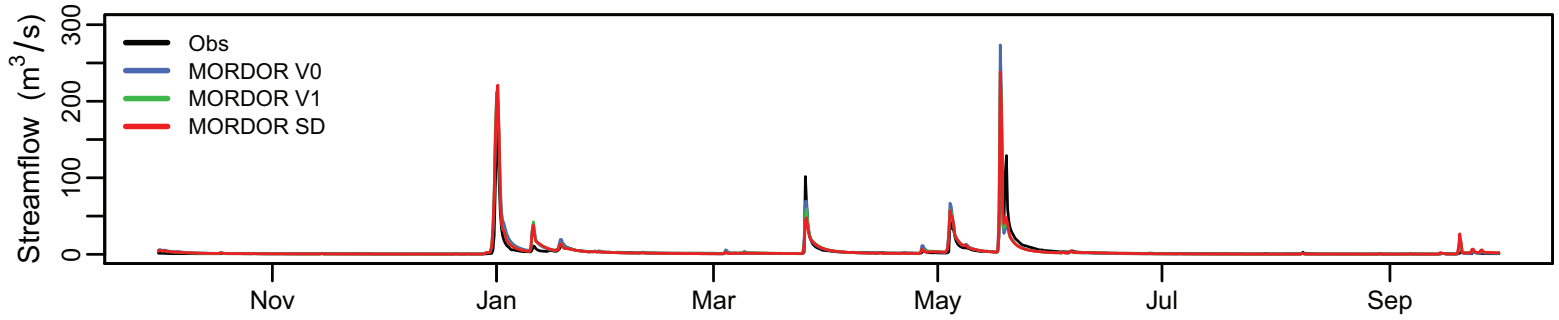

Year 2000

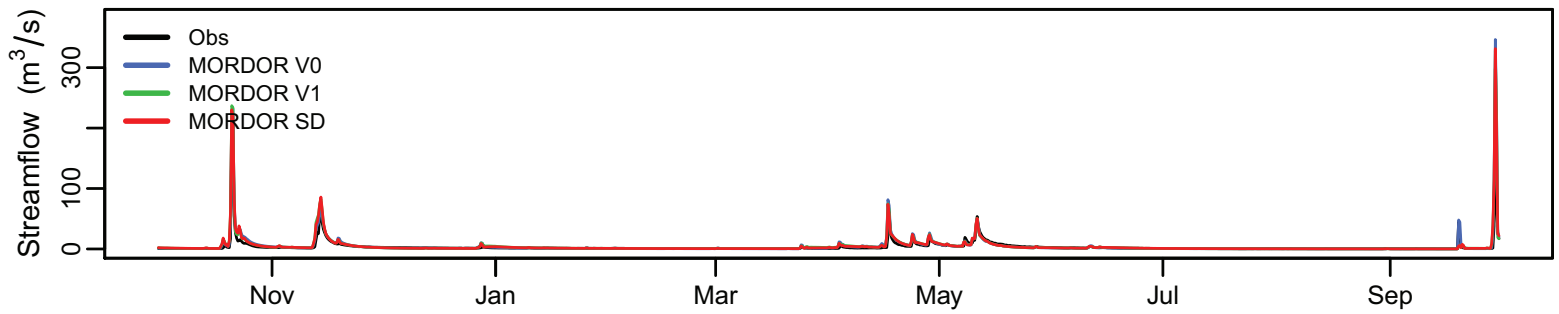

Year 2001

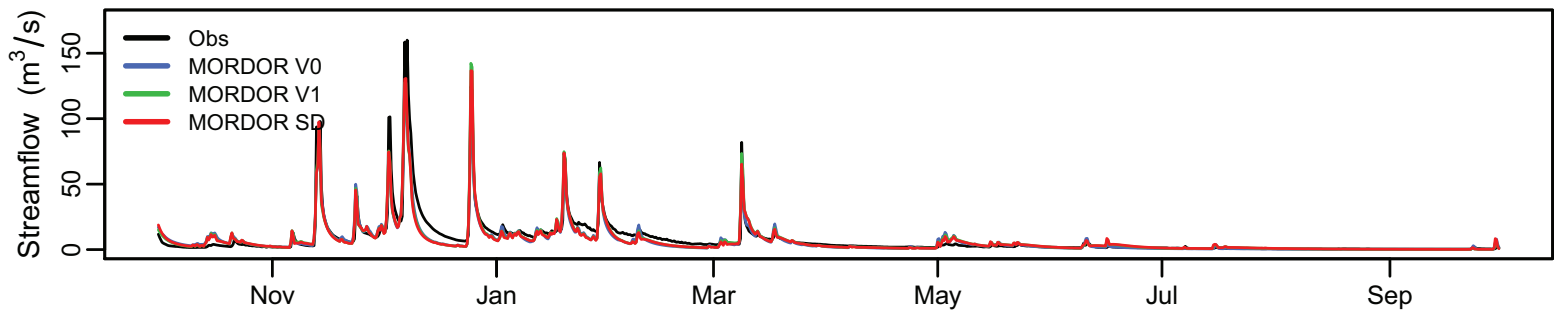

Year 2002

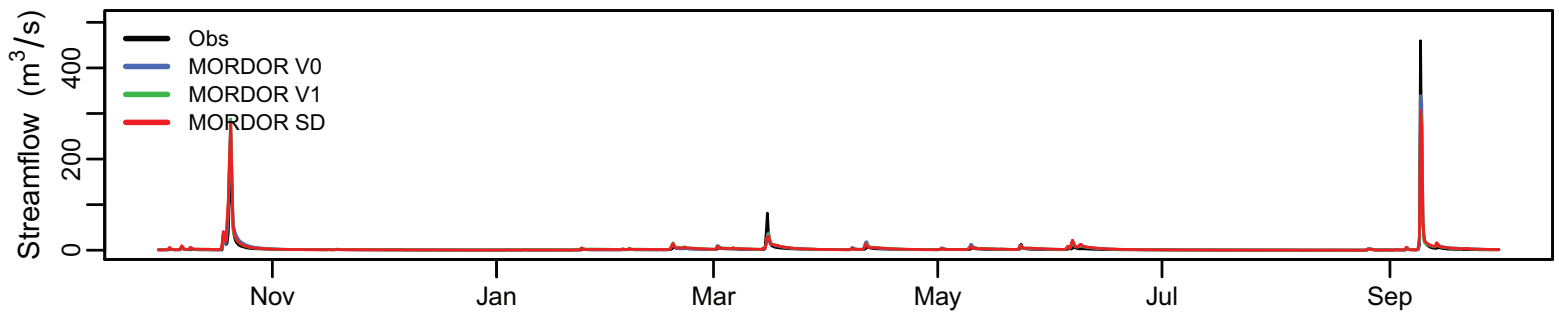

Year 2003

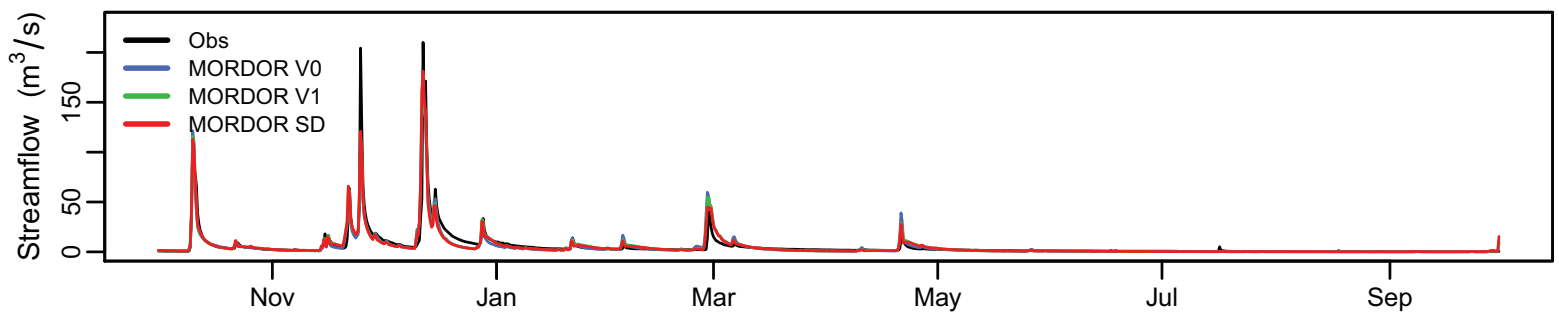

Year 2004

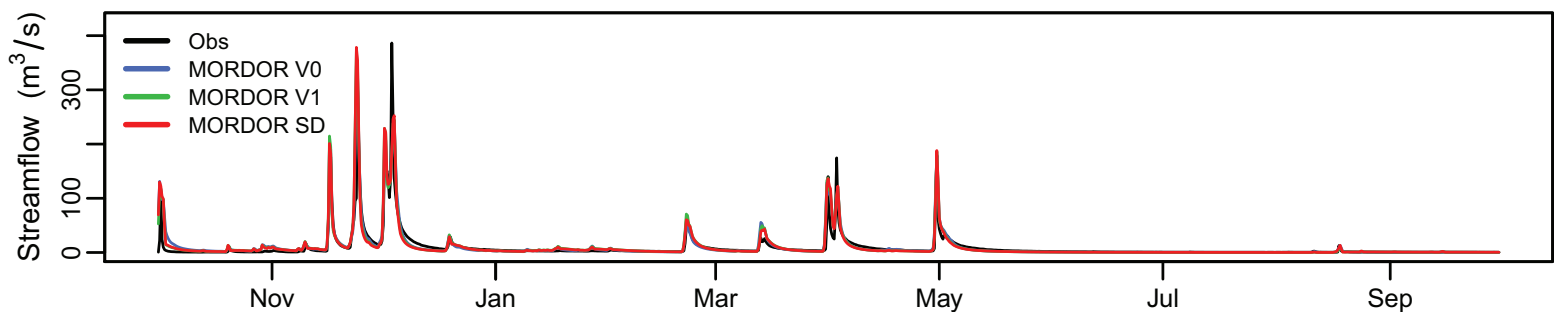

# Gardon@Generargues

Year 2005

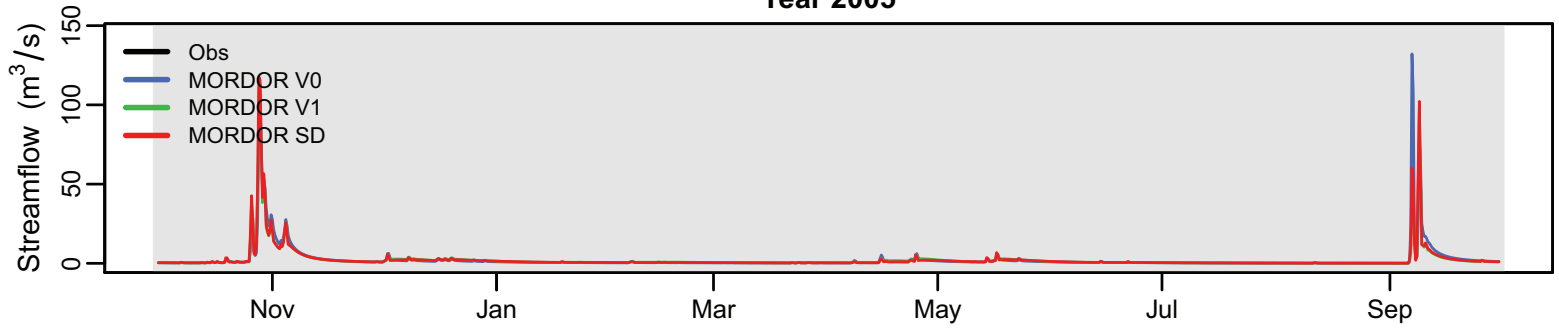

Year 2006

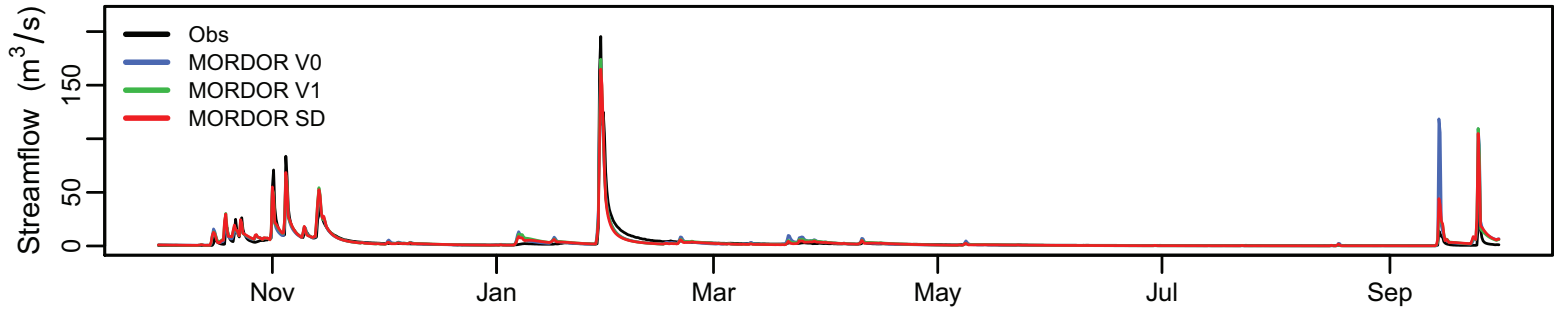

Year 2007

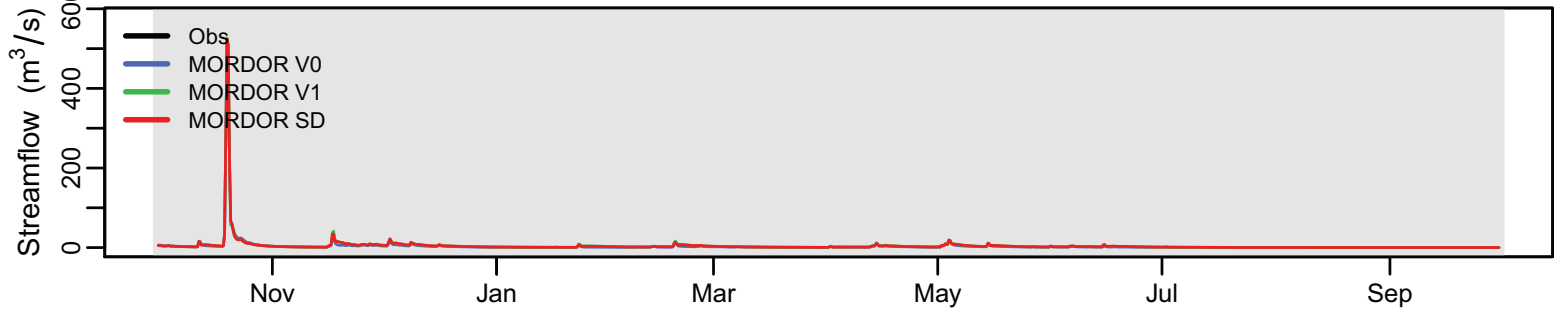

Year 2008

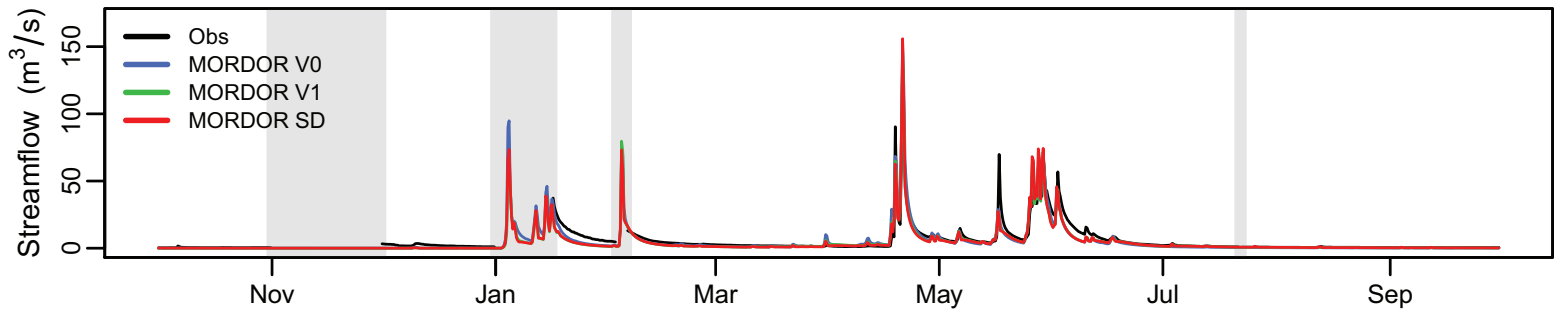

# GaveEstaubé@Gloriettes

Year 1988

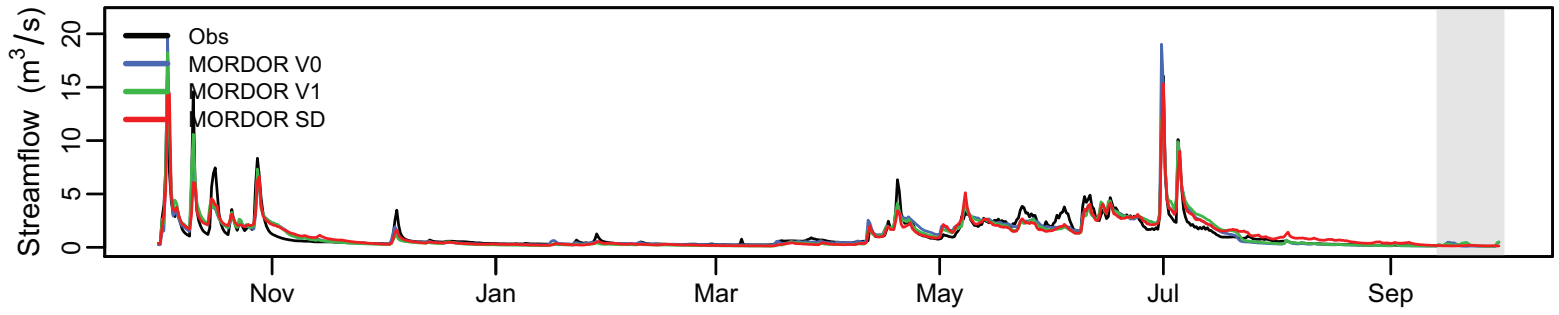

Year 1989

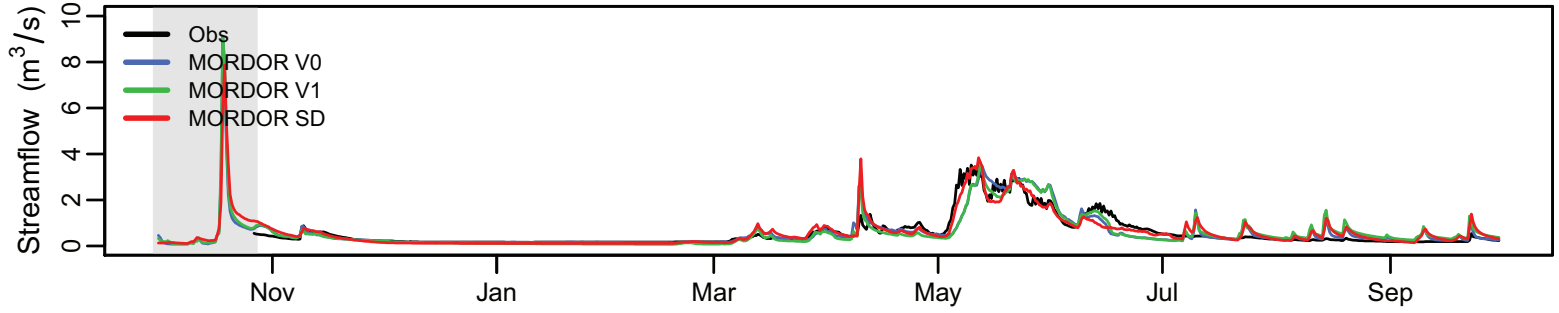

Year 1990

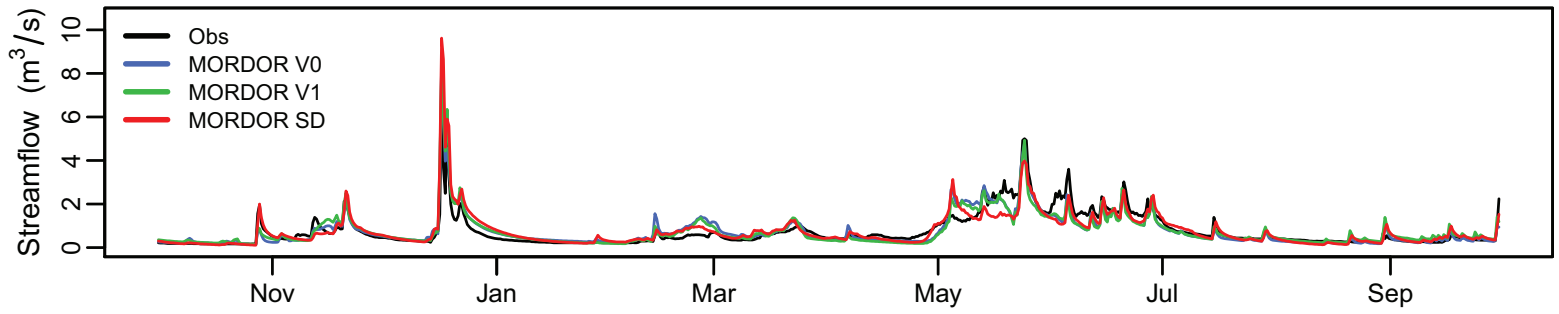

Year 1991

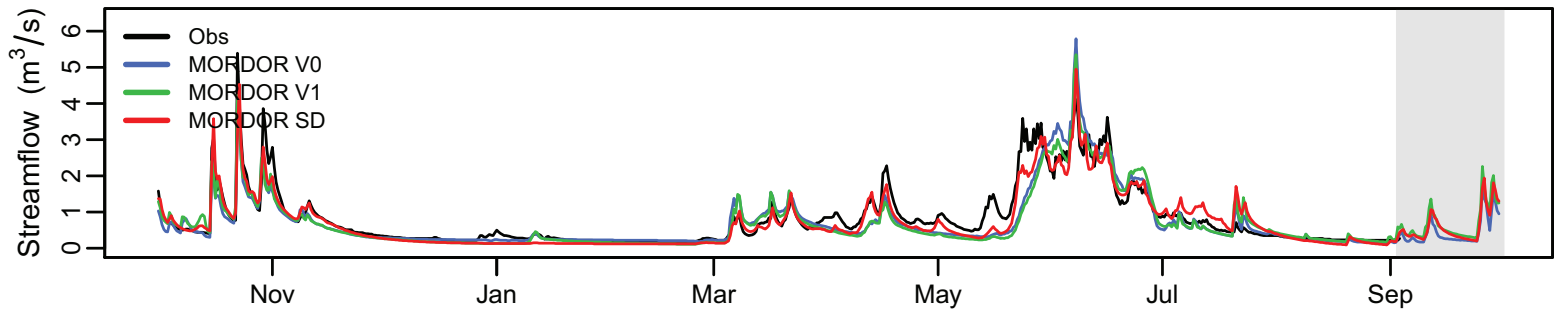

Year 1992

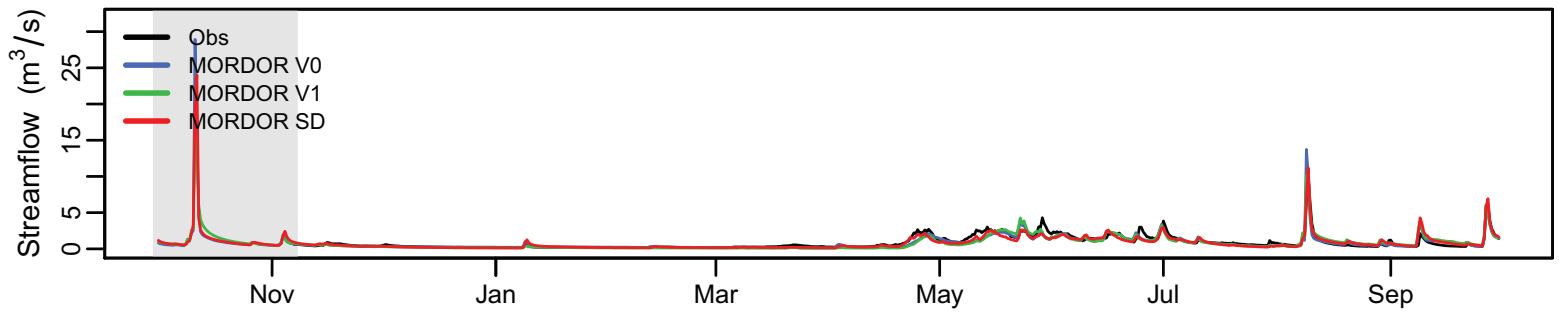

Year 1993

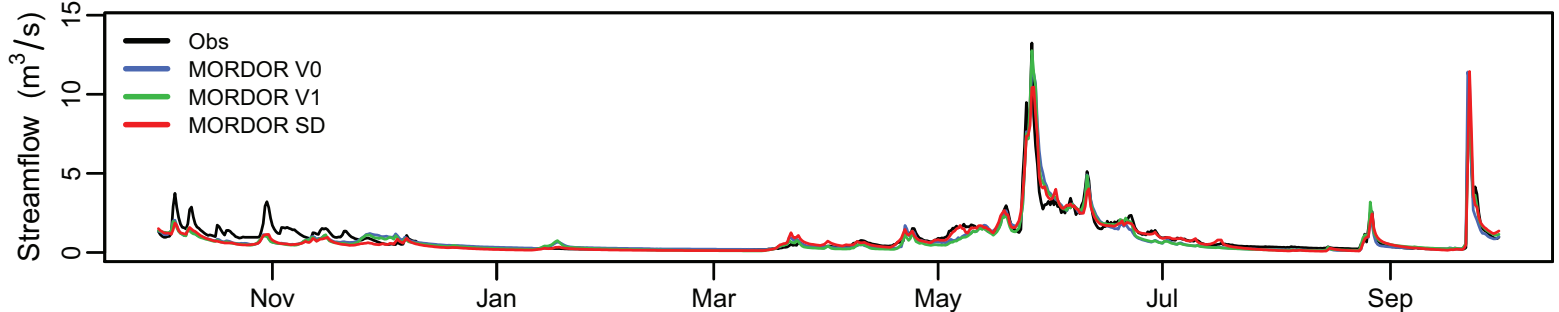



# GaveEstaube@Gloriettes

Year 1994

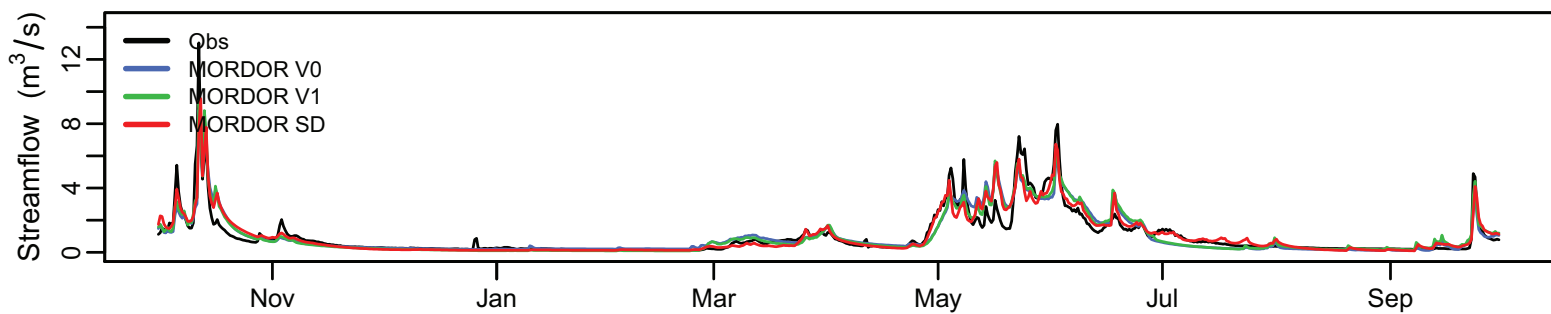

Year 1995

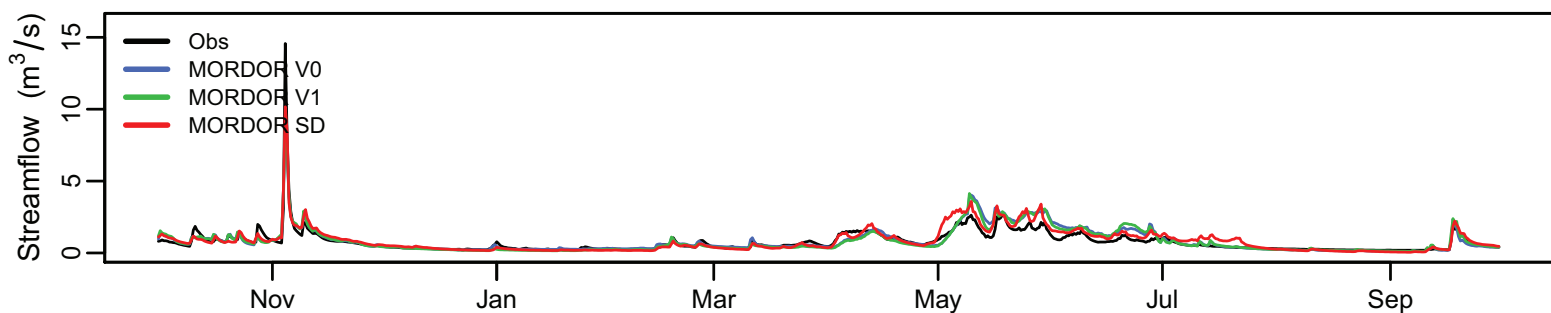

Year 1996

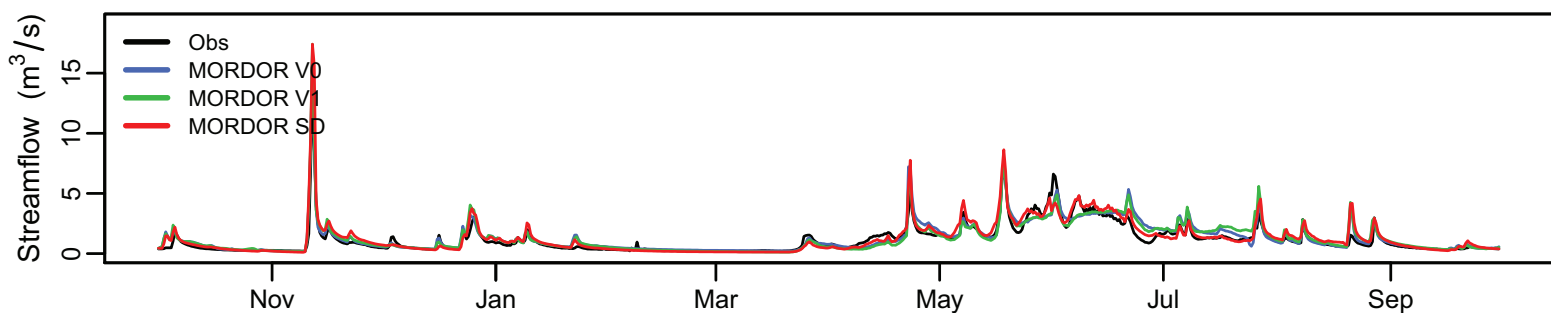

Year 1997

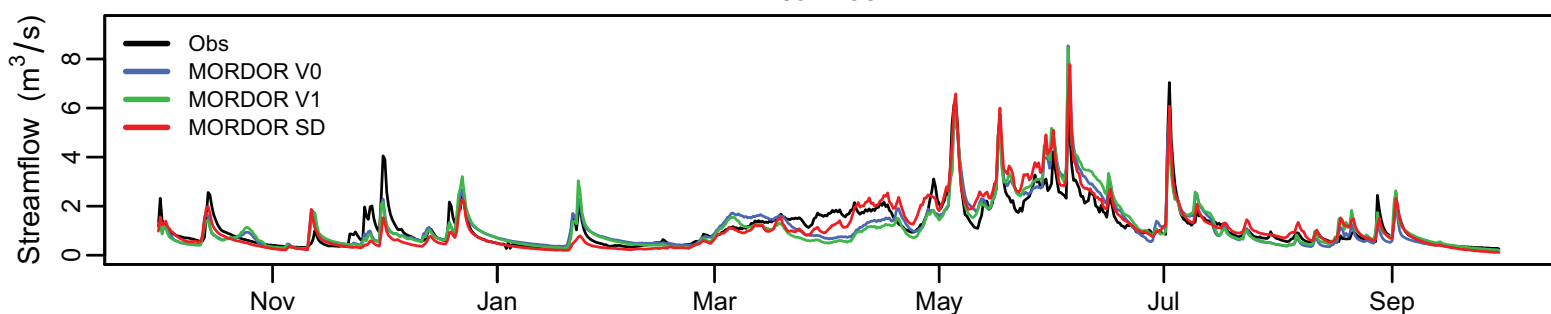

Year 1998

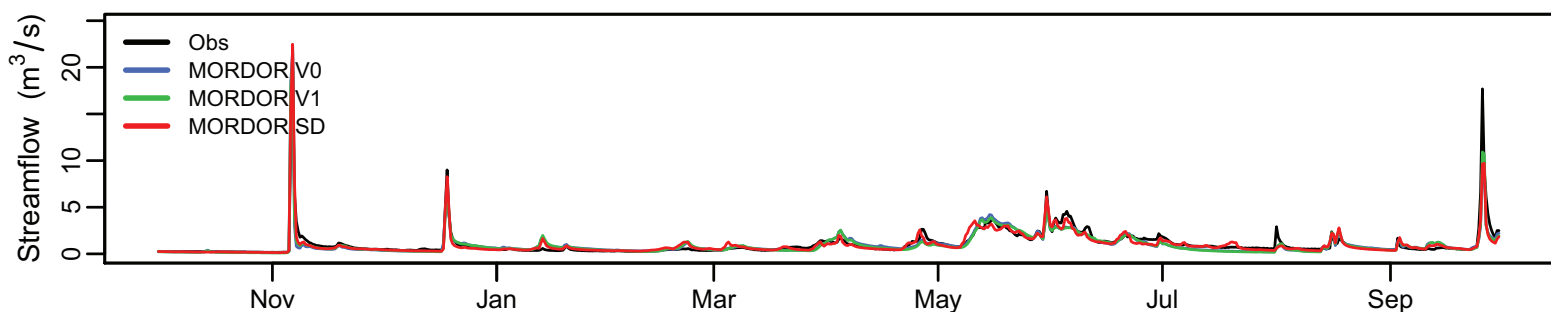

Year 1999

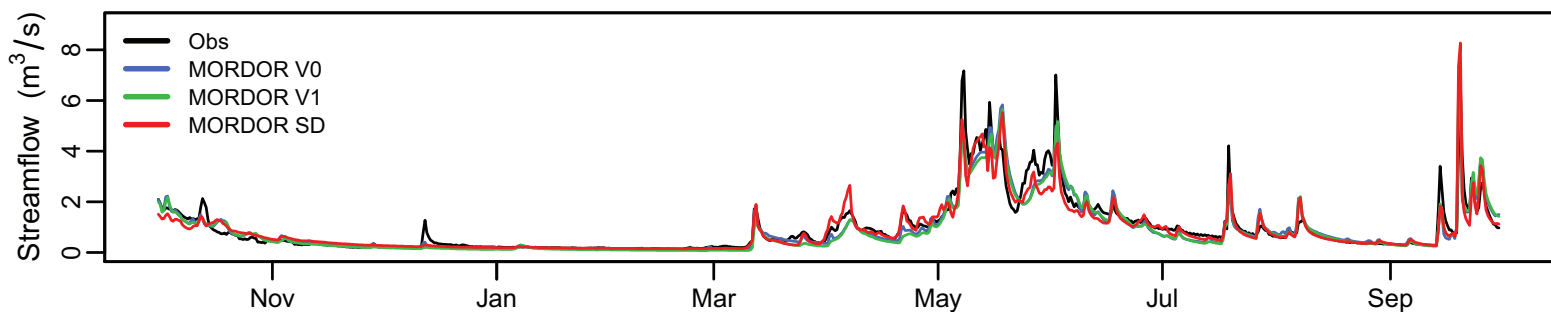

# GaveEstaubé@Gloriettes

Year 2000

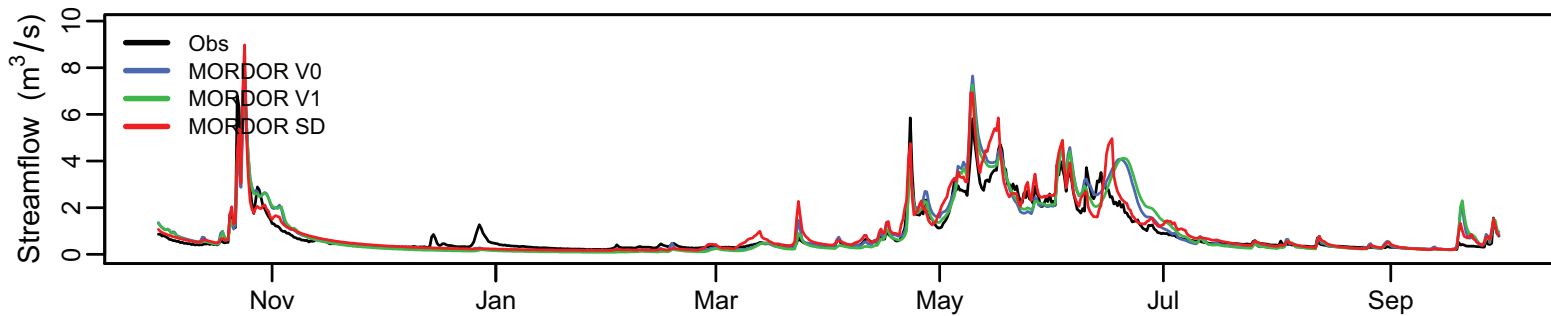

Year 2001

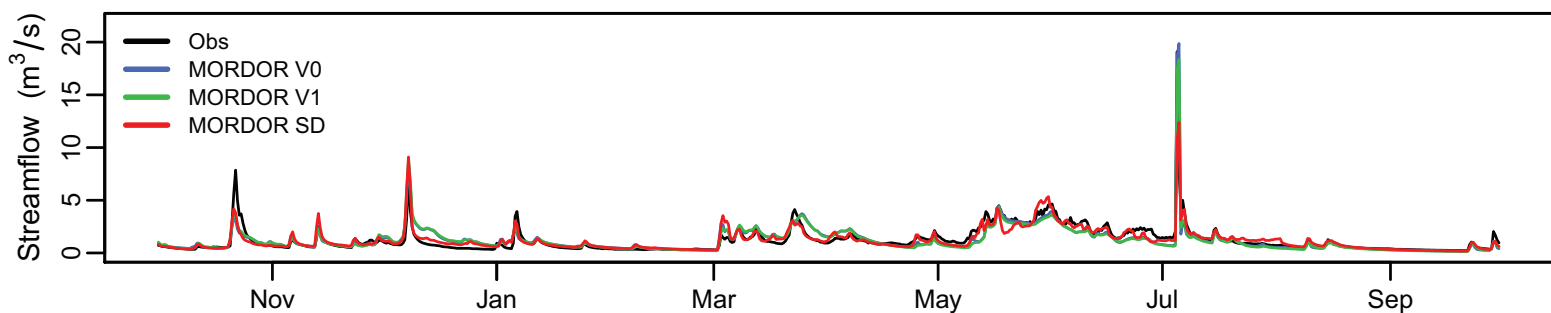

Year 2002

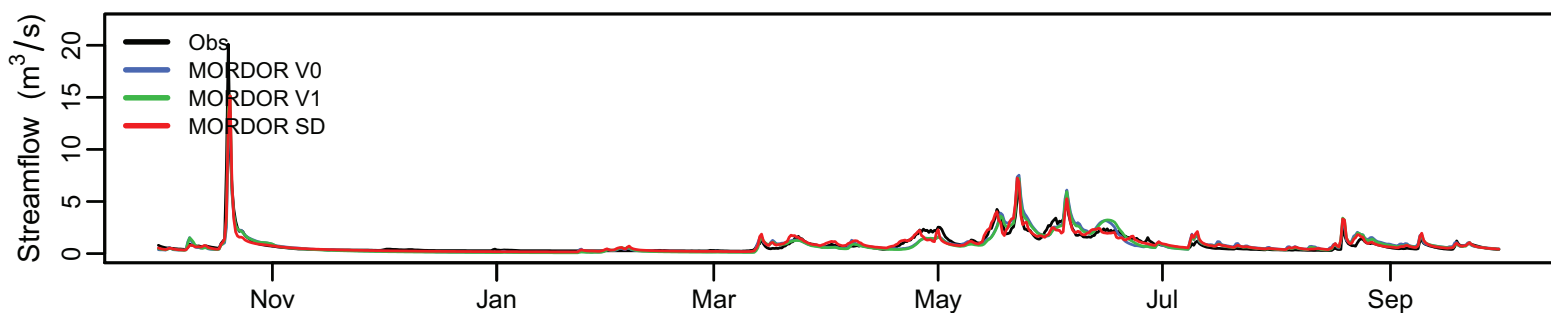

Year 2003

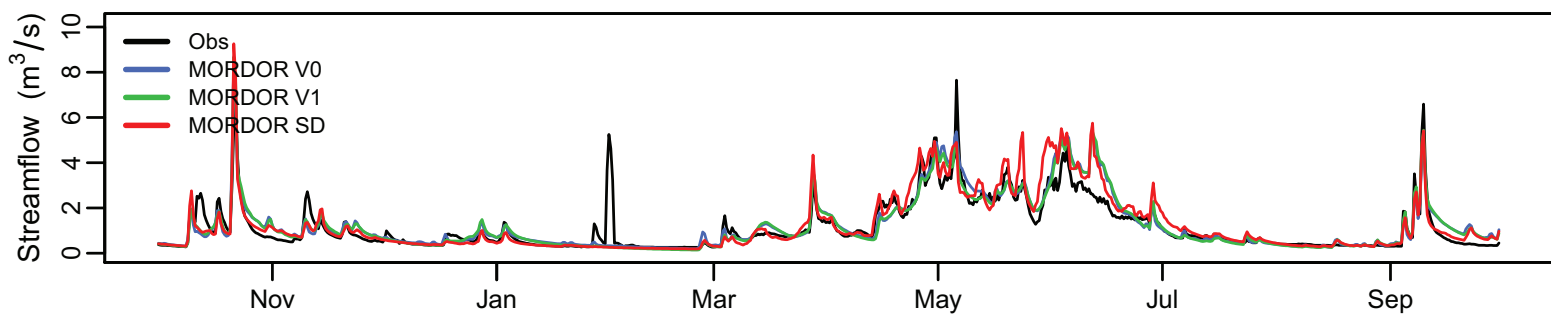

Year 2004

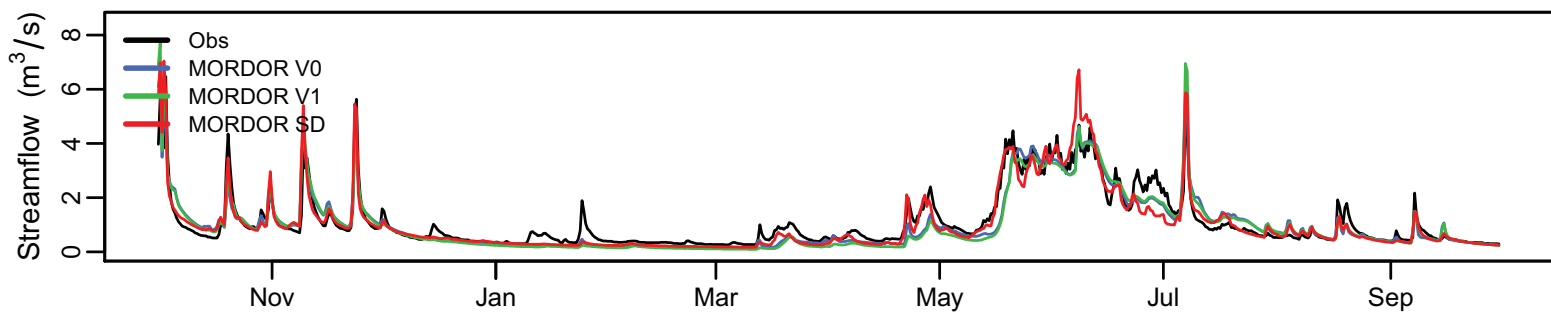

Year 2005

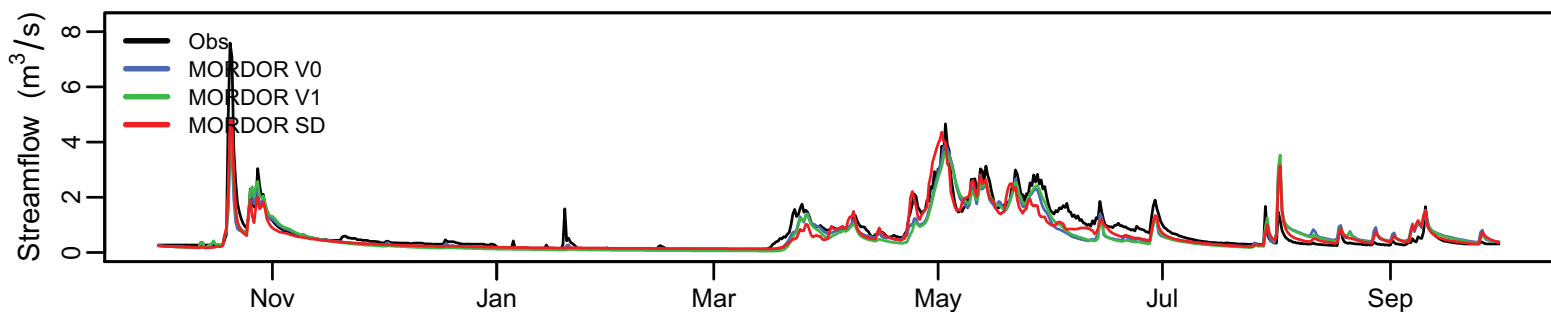

# GaveEstaubé@Gloriettes

Year 2006

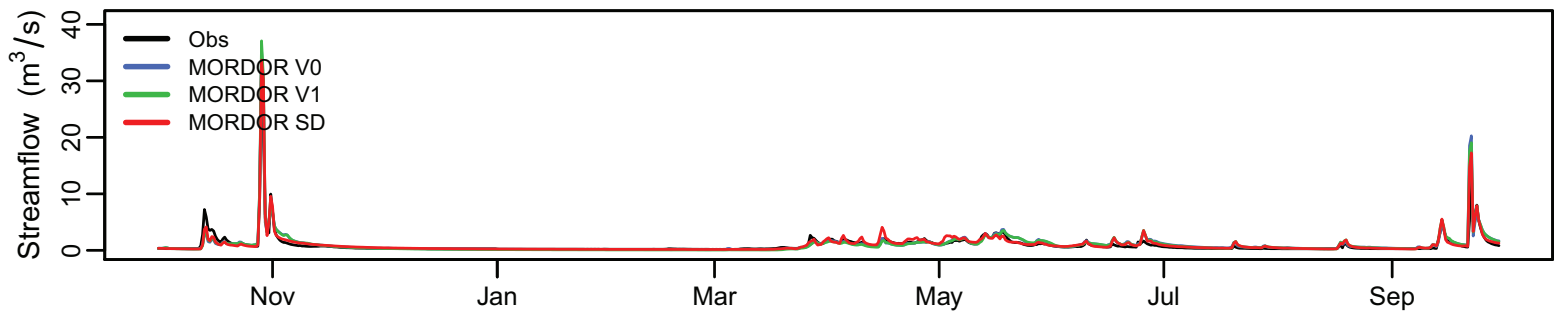

# Goussant@PontRolland

Year 1994

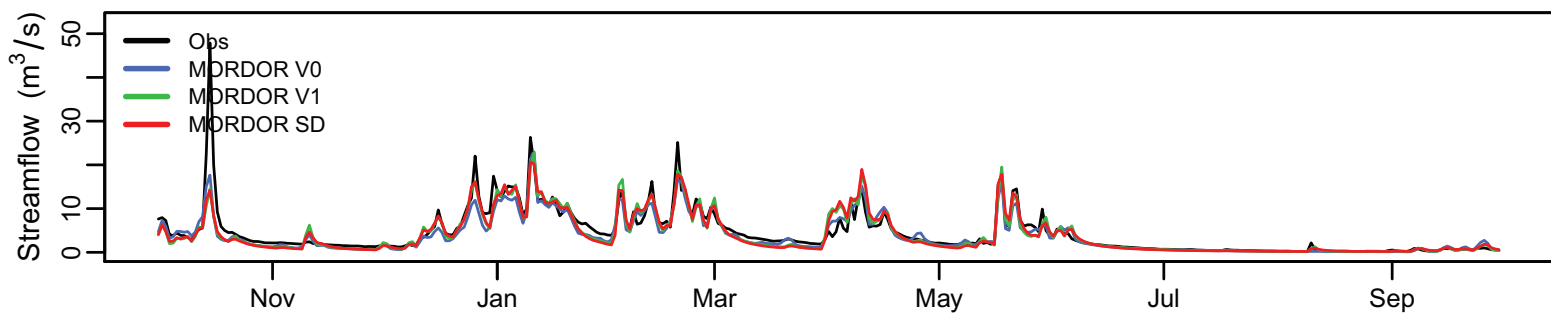

Year 1995

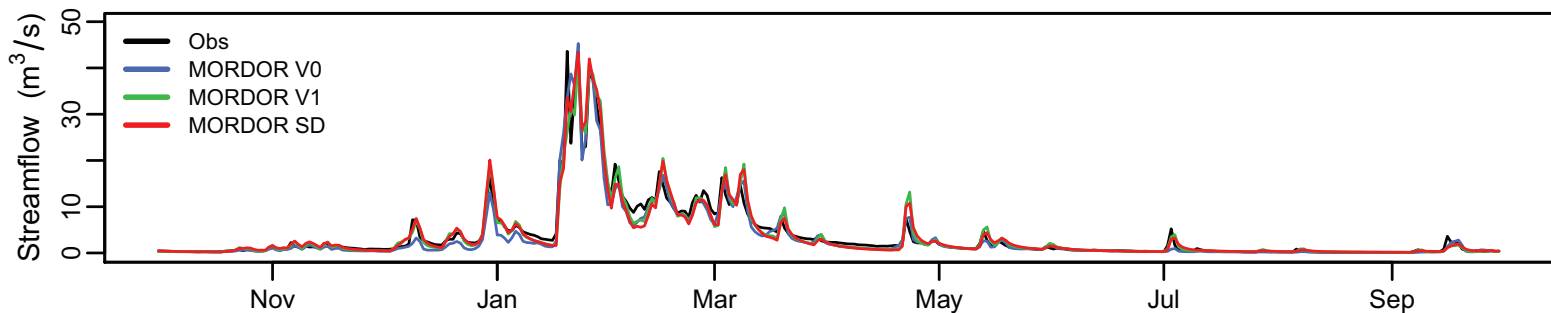

Year 1996

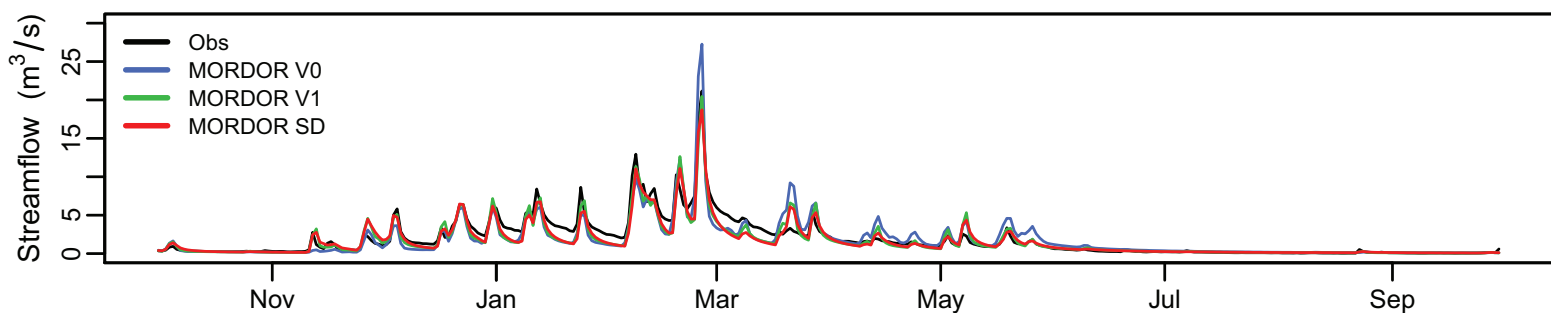

Year 1997

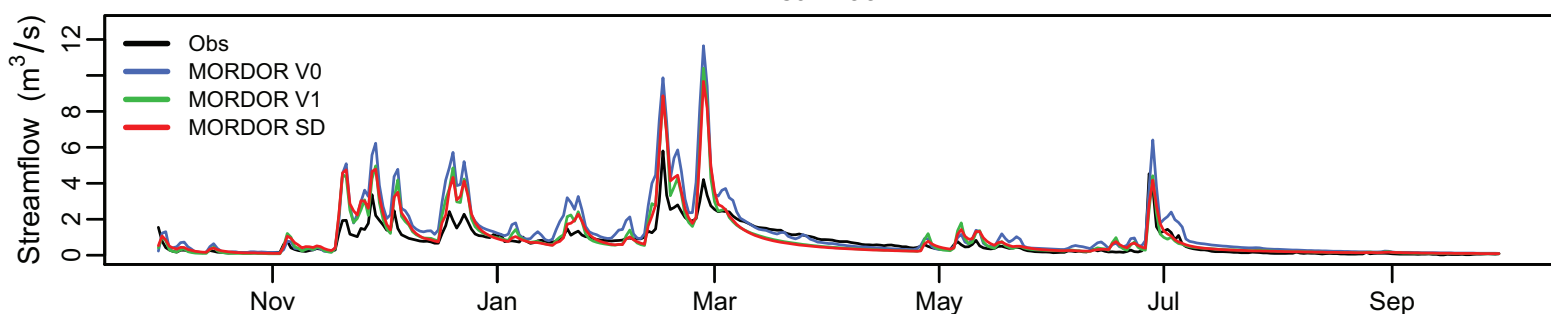

Year 1998

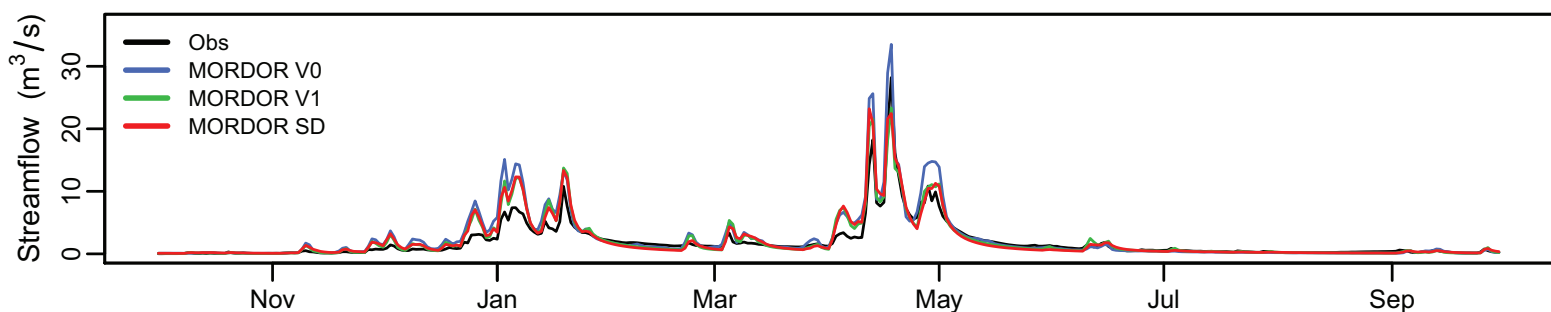

Year 1999

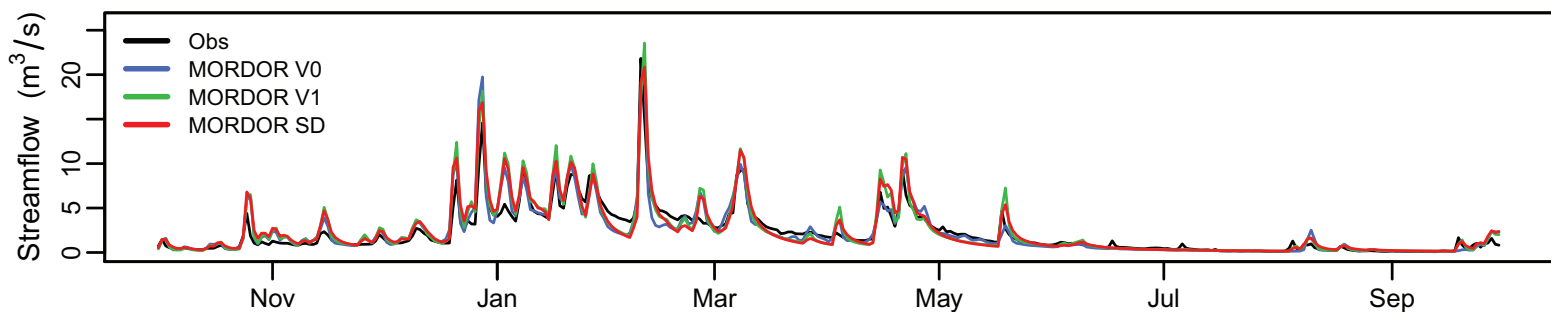

# Goussant@PontRolland

Year 2000

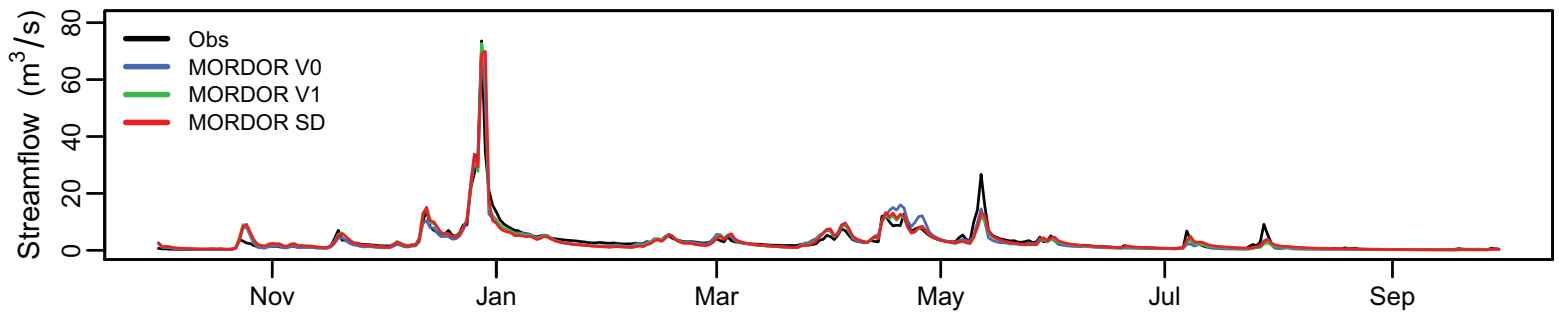

Year 2001

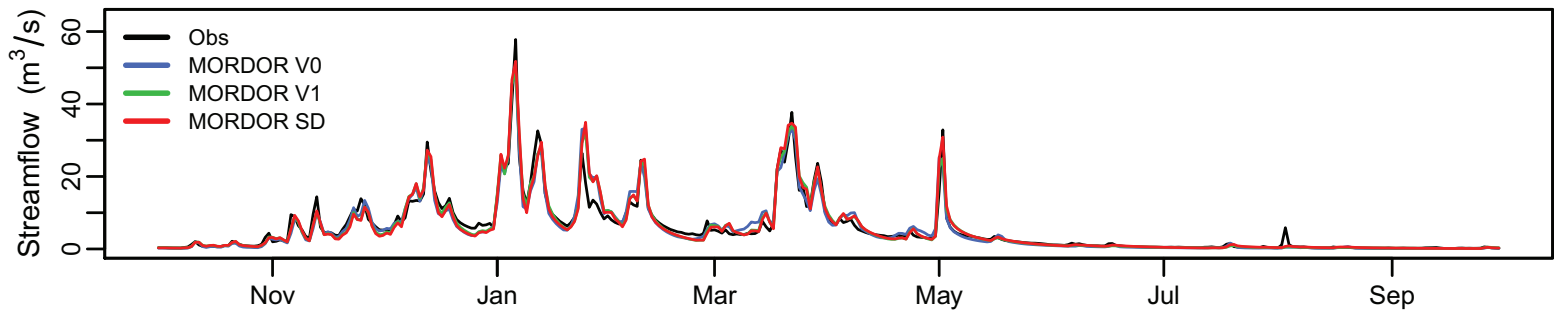

Year 2002

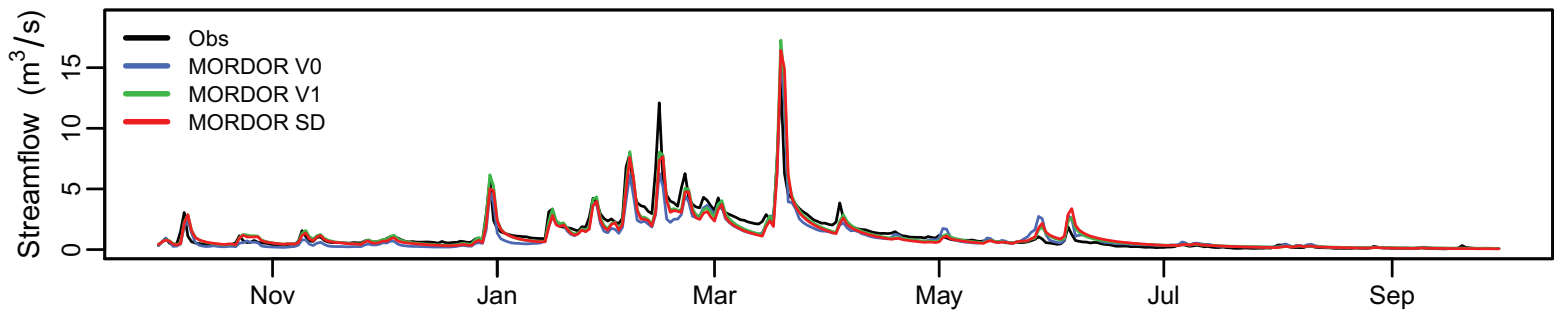

Year 2003

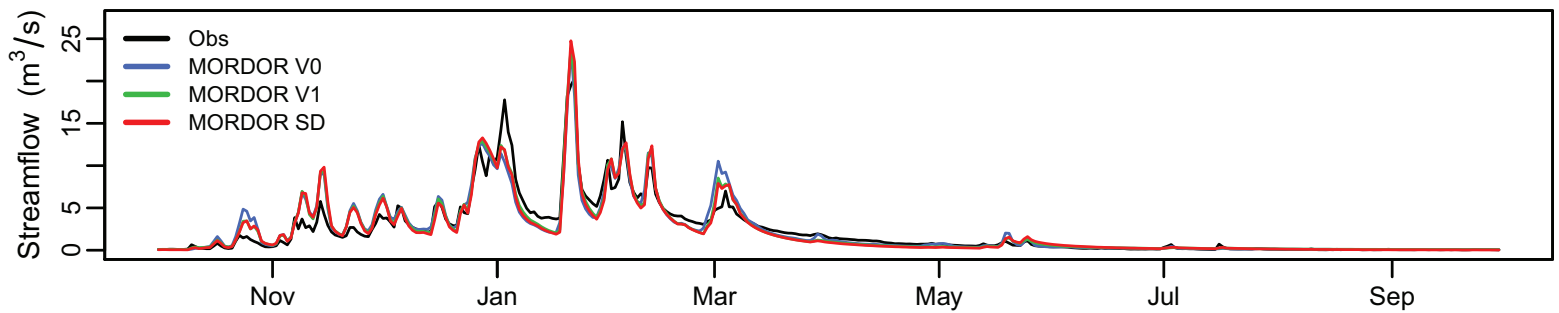

Year 2004

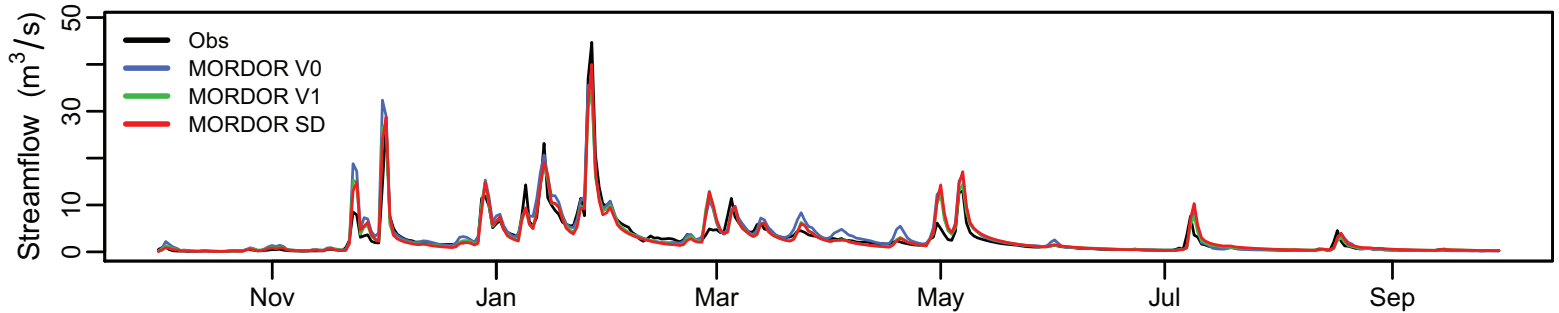

# Loire@Basset

Year 1957

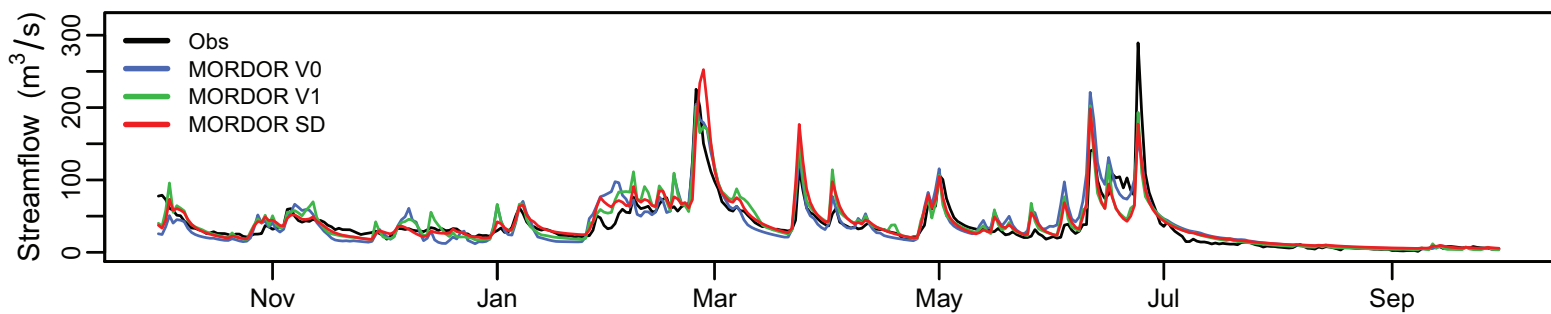

Year 1958

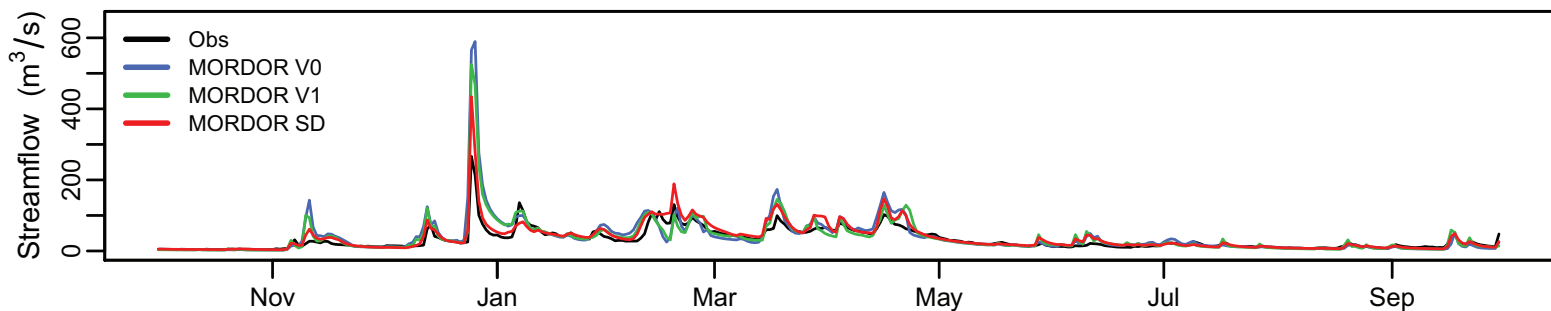

Year 1959

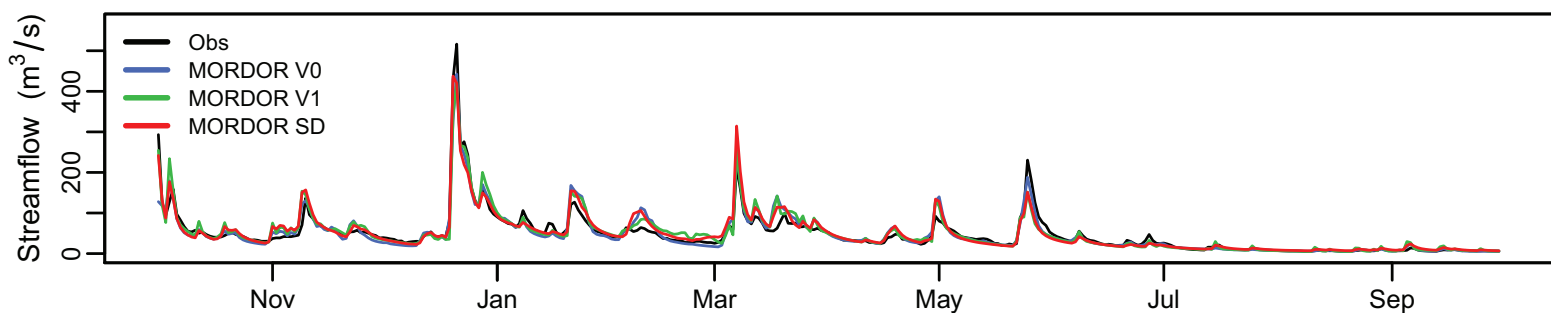

Year 1960

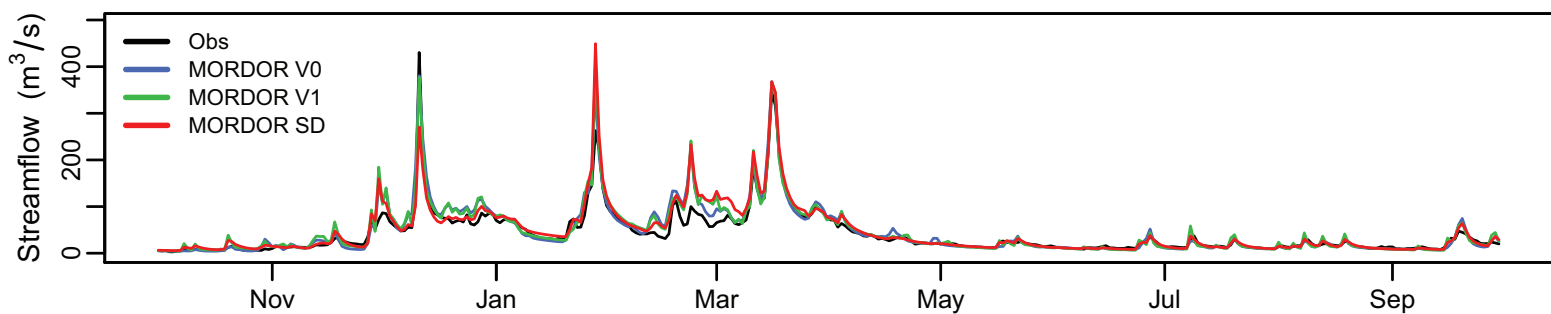

Year 1961

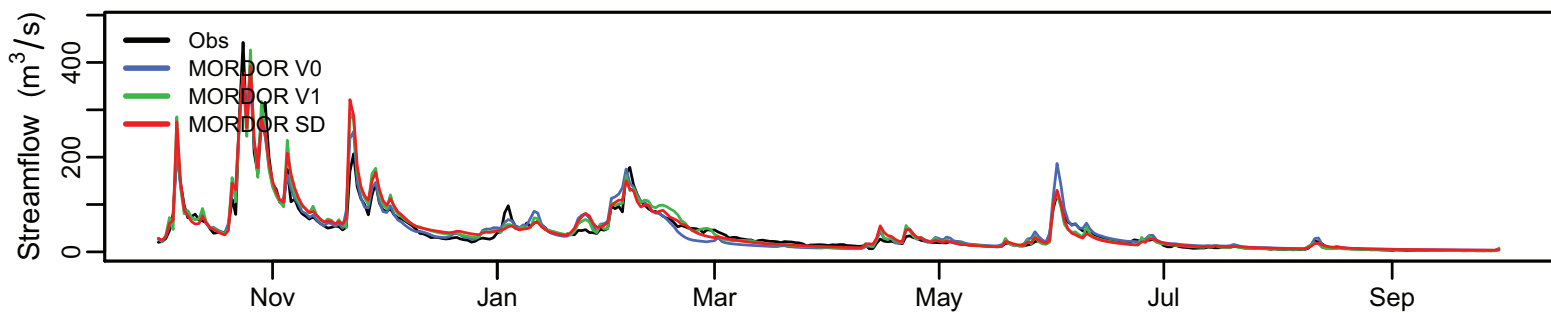

Year 1962

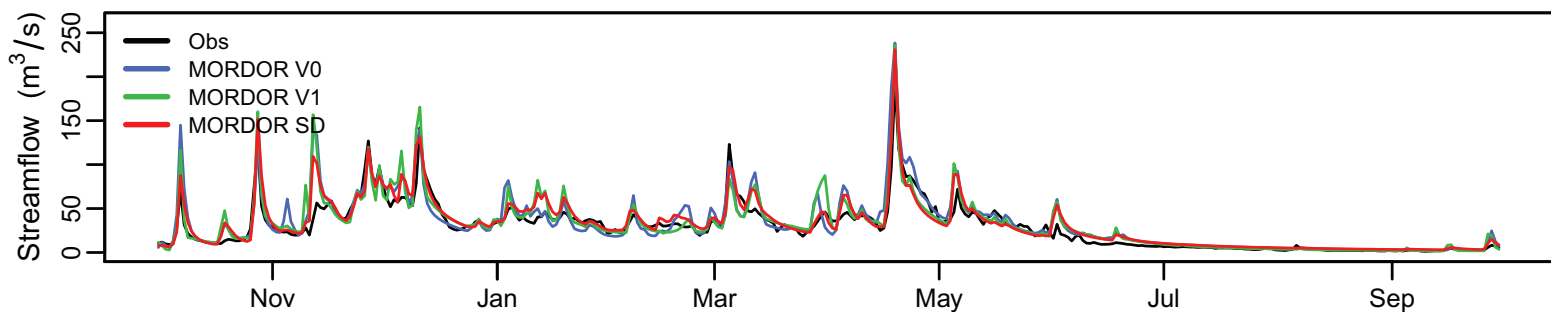

# Loire@Basset

Year 1963

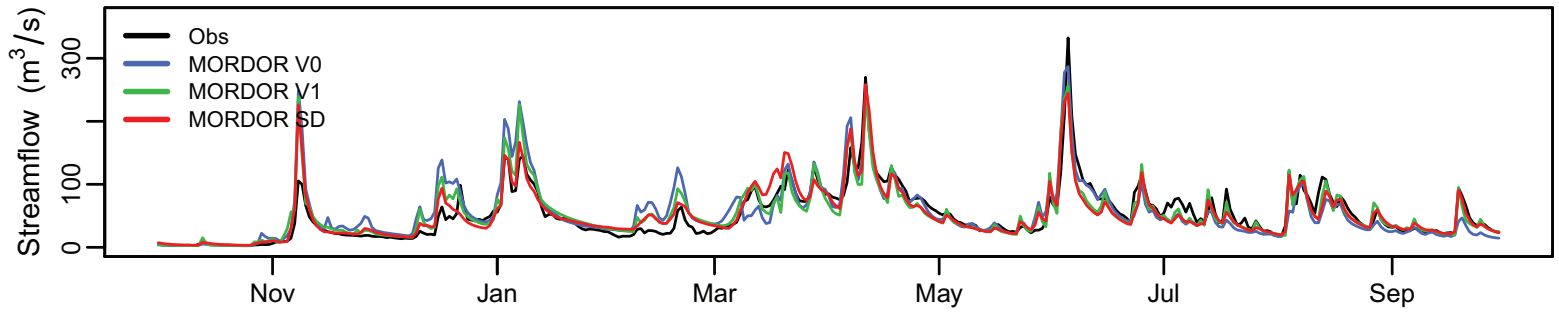

Year 1964

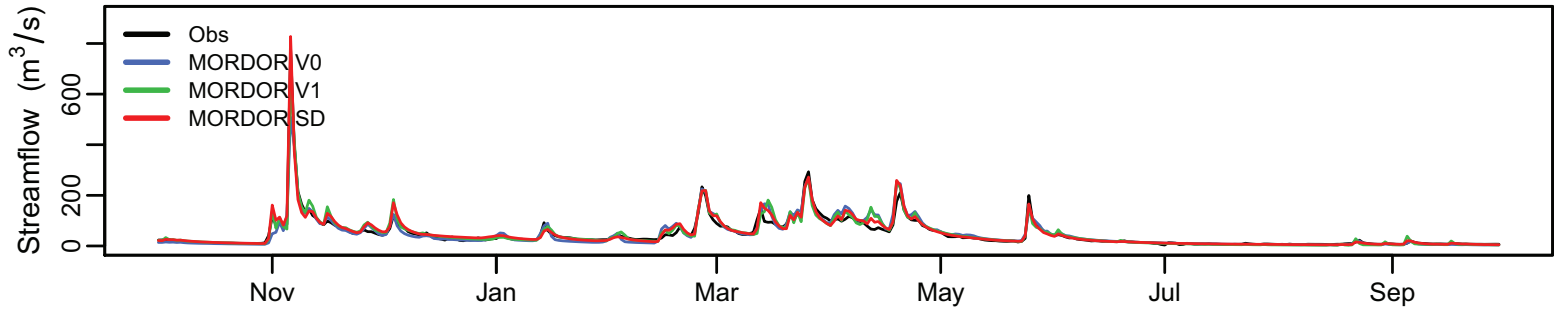

Year 1965

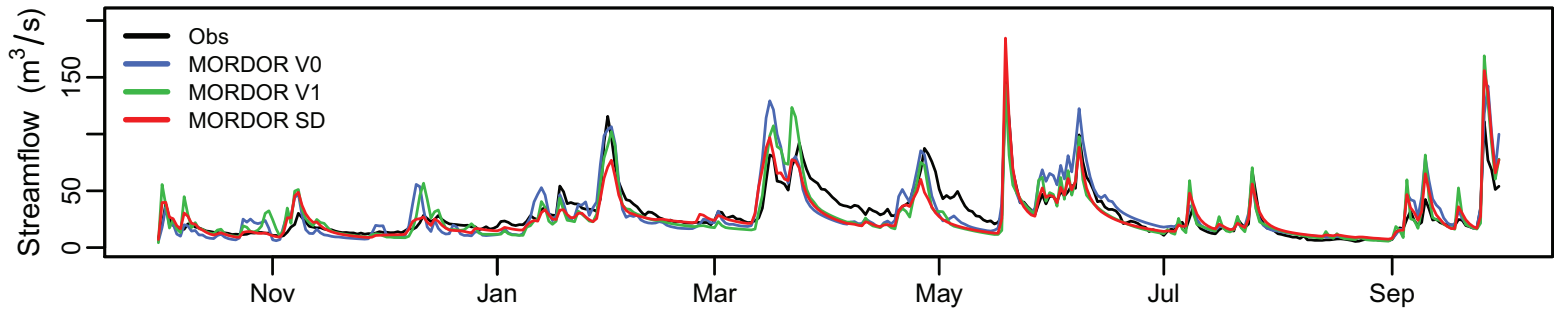

Year 1966

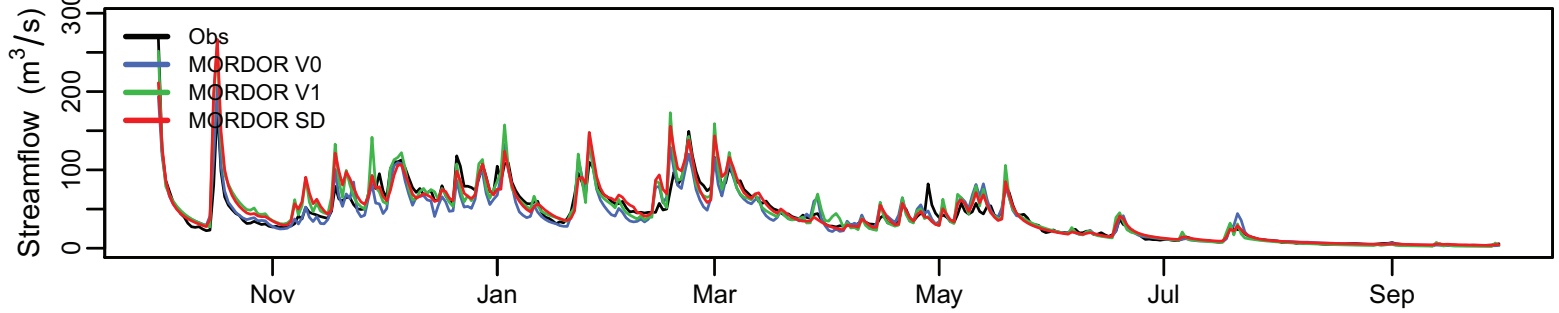

Year 1967

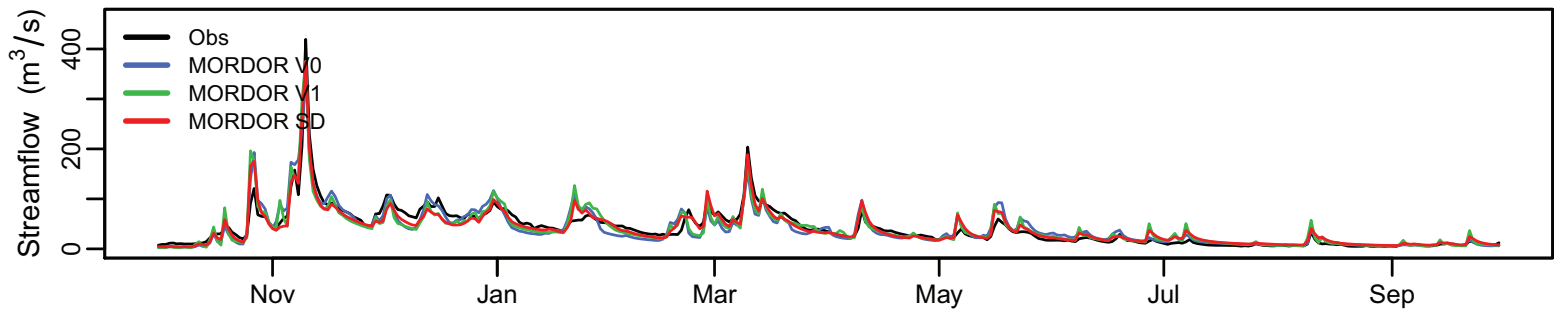

Year 1968

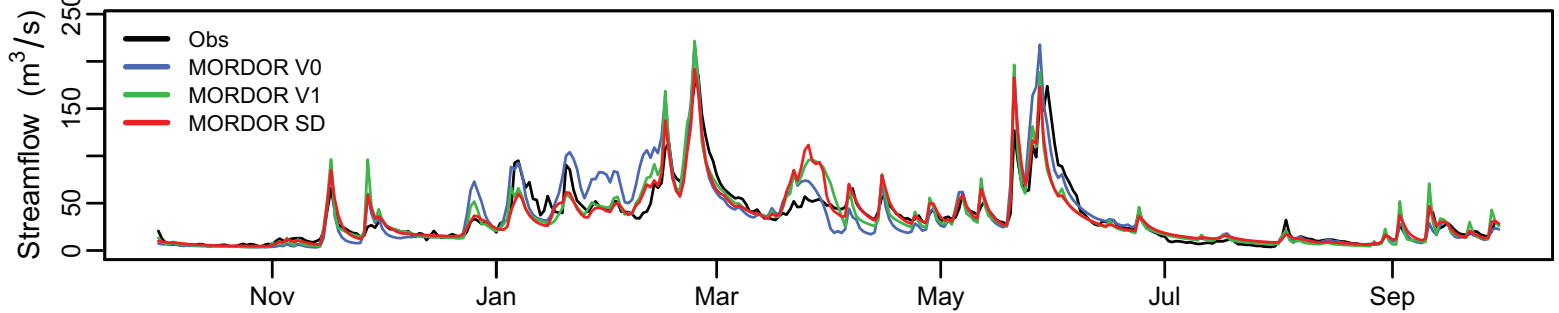

# Loire@Basset

Year 1969

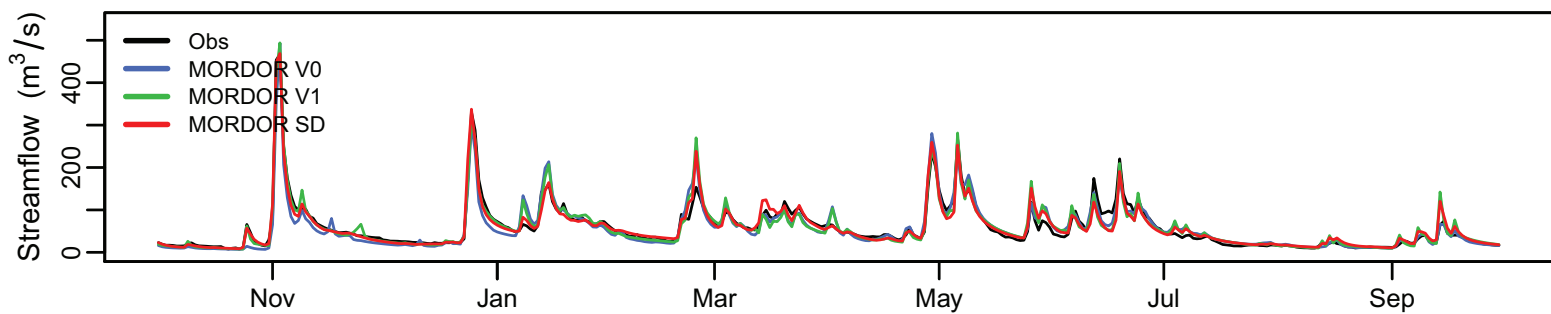

Year 1970

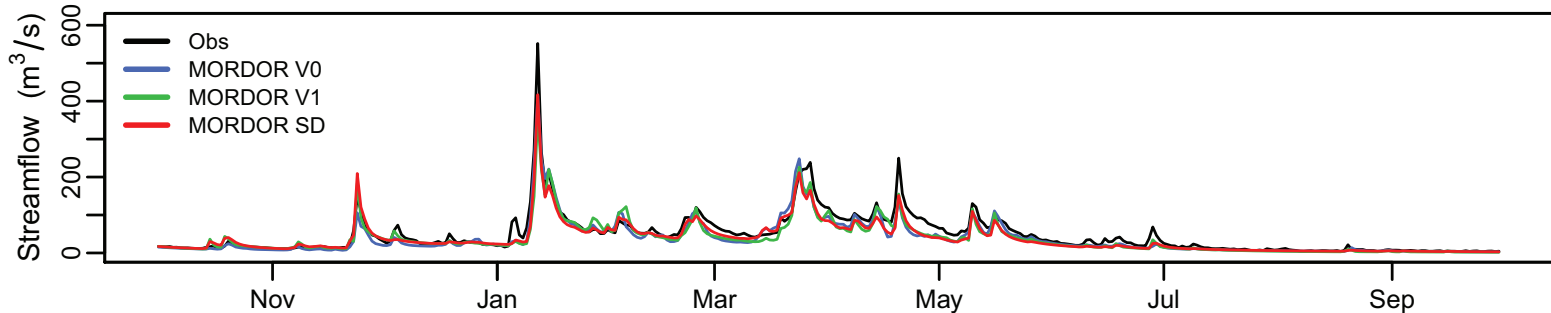

Year 1971

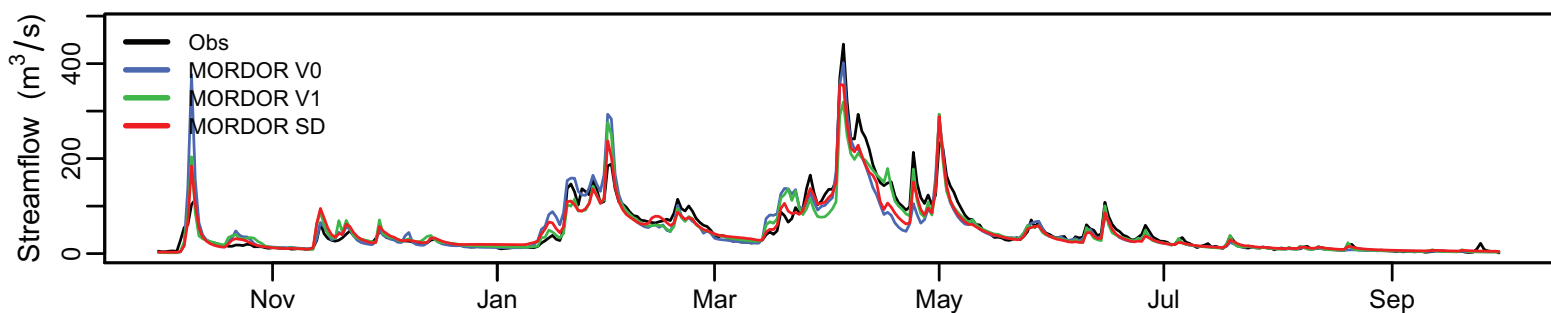

Year 1972

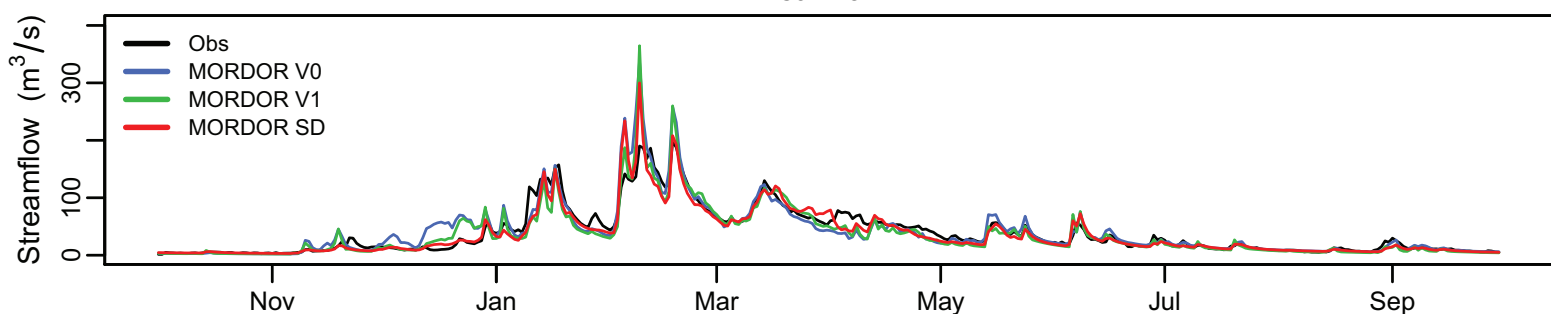

Year 1973

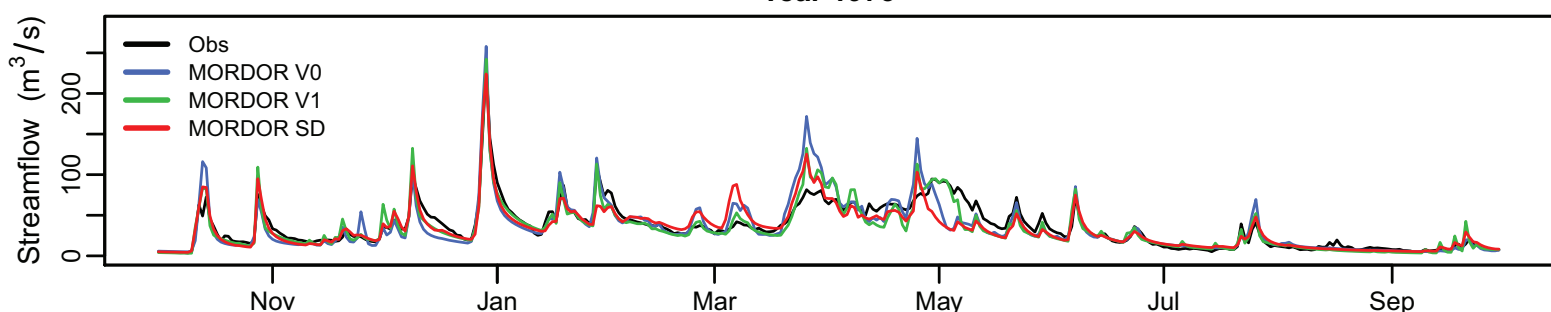

Year 1974

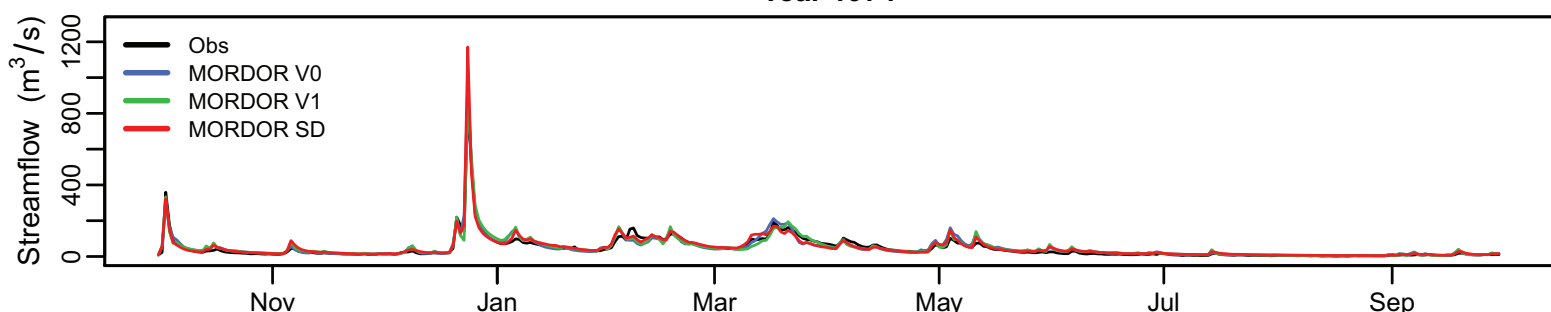



# Loire@Basset

Year 1975

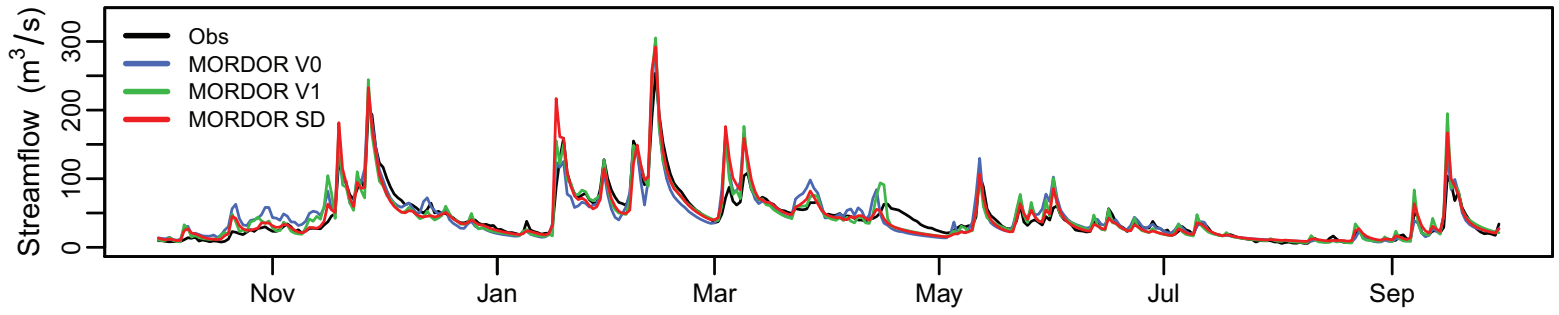

Year 1976

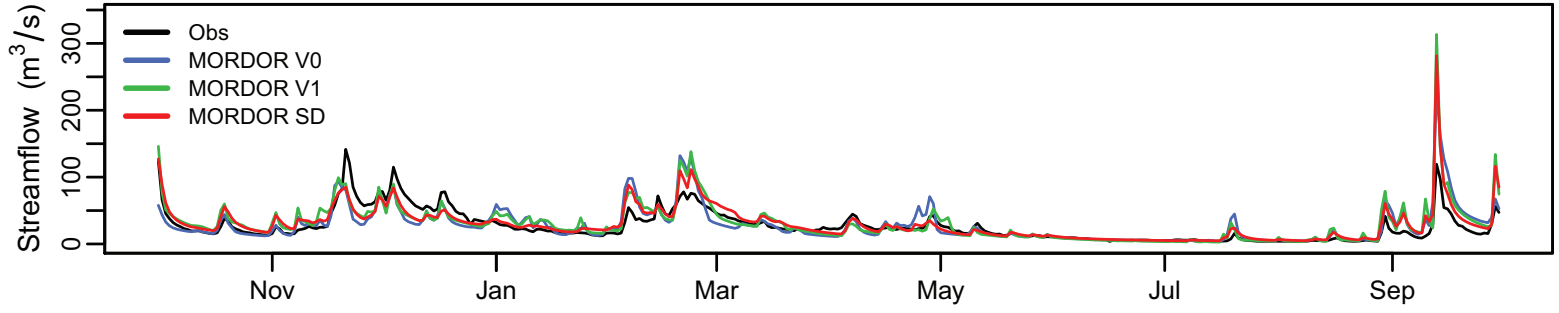

Year 1977

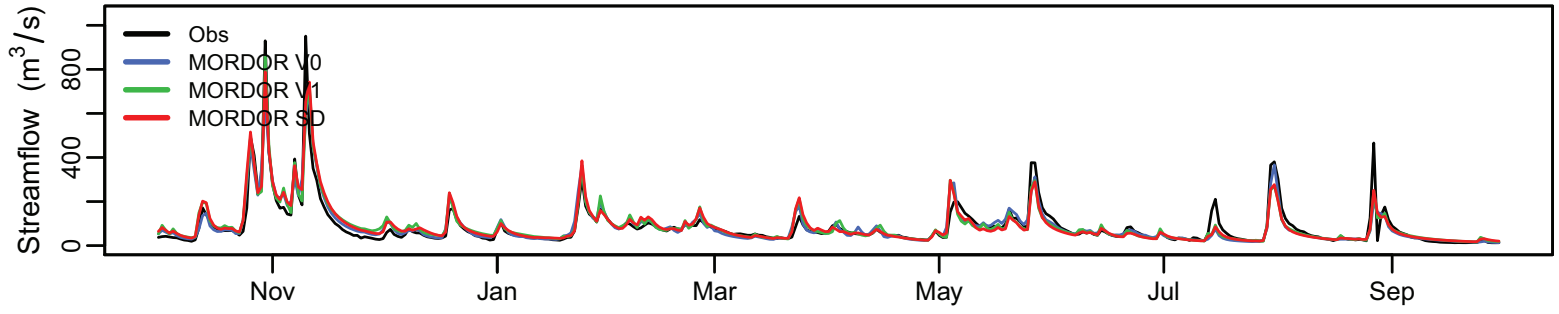

Year 1978

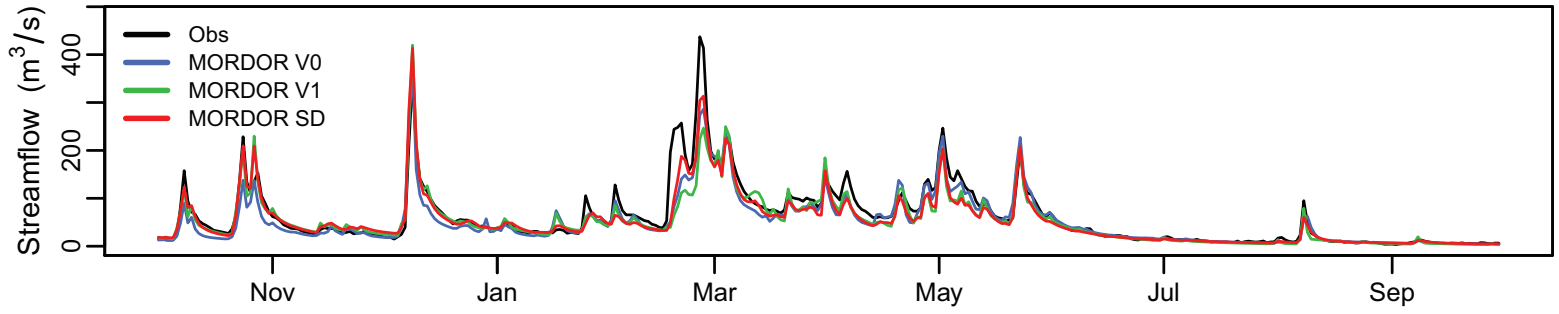

Year 1979

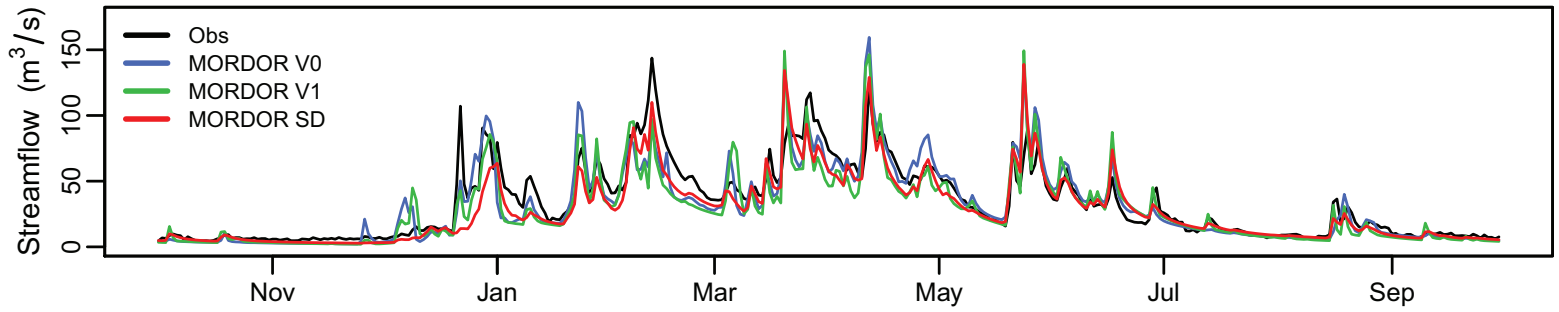

Year 1980

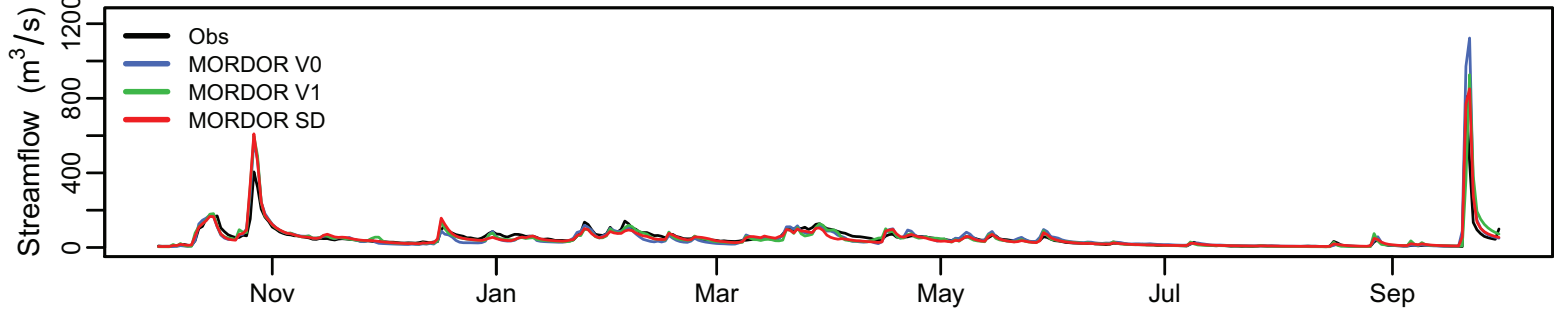

# Loire@Basset

Year 1981

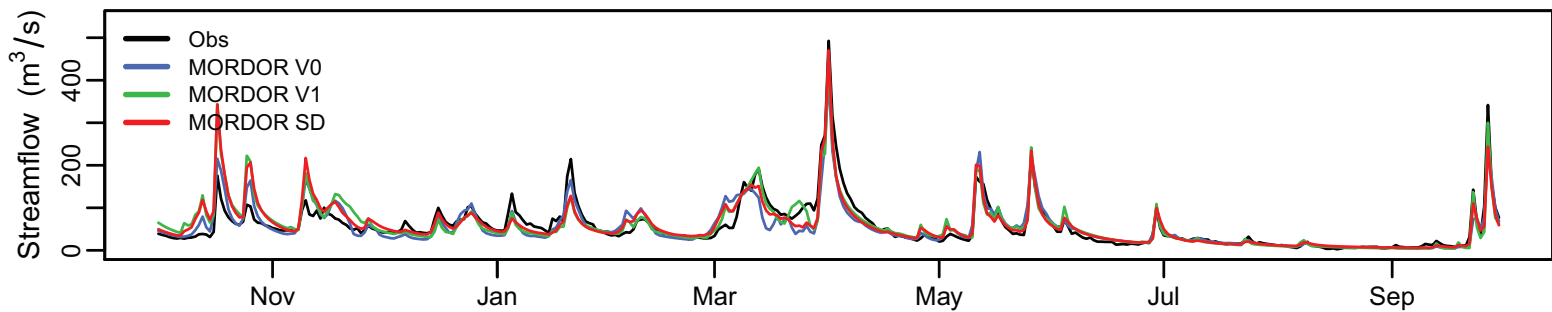

Year 1982

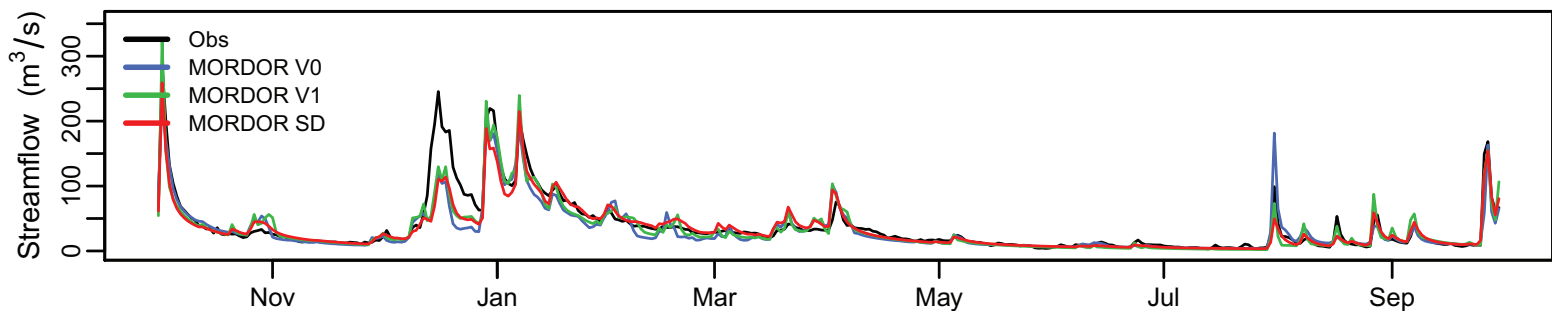

Year 1983

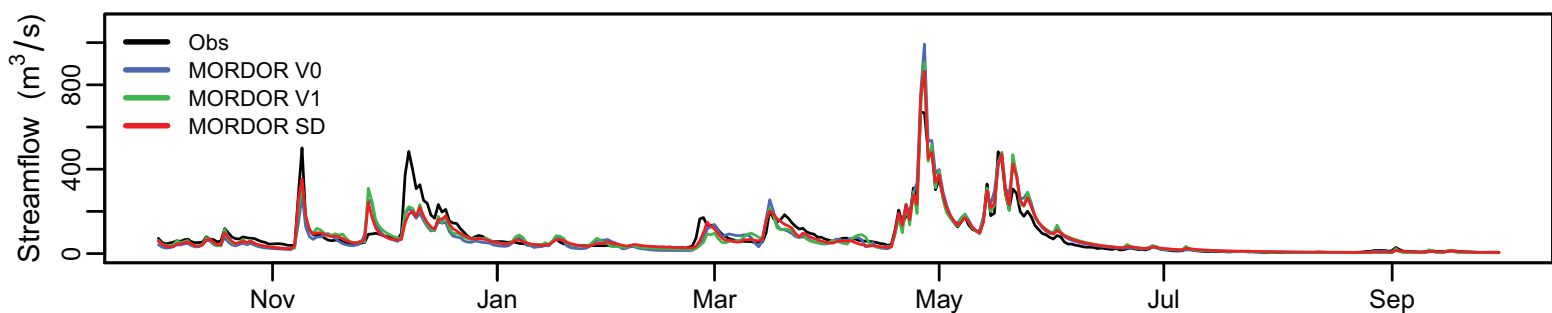

Year 1984

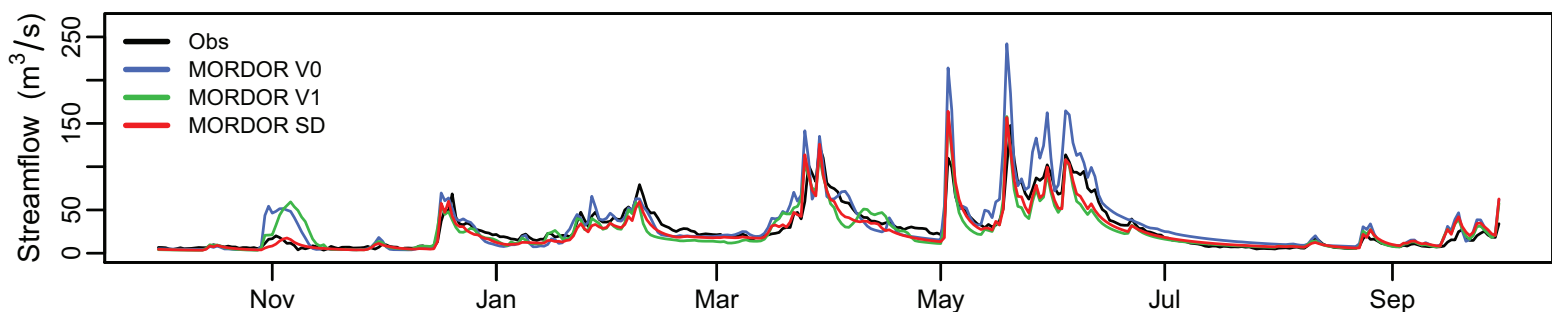

Year 1985

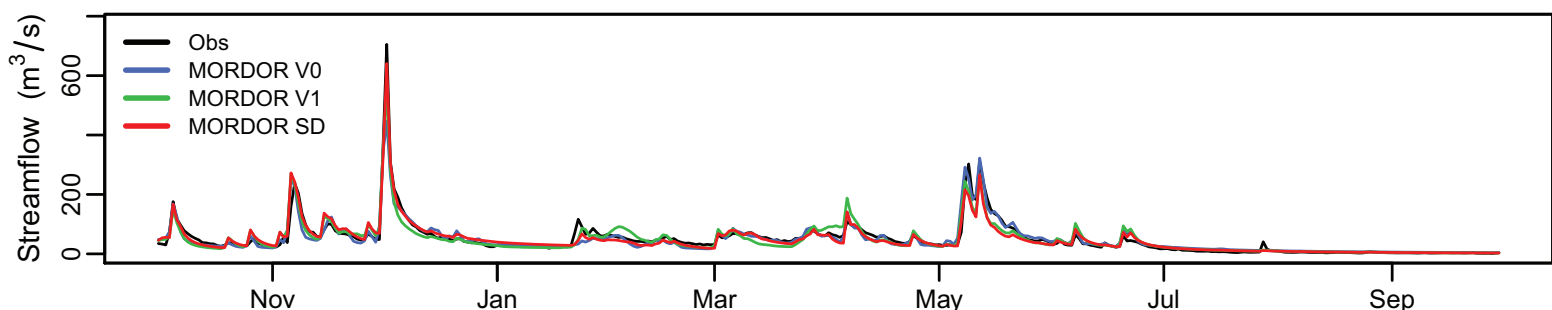

Year 1986

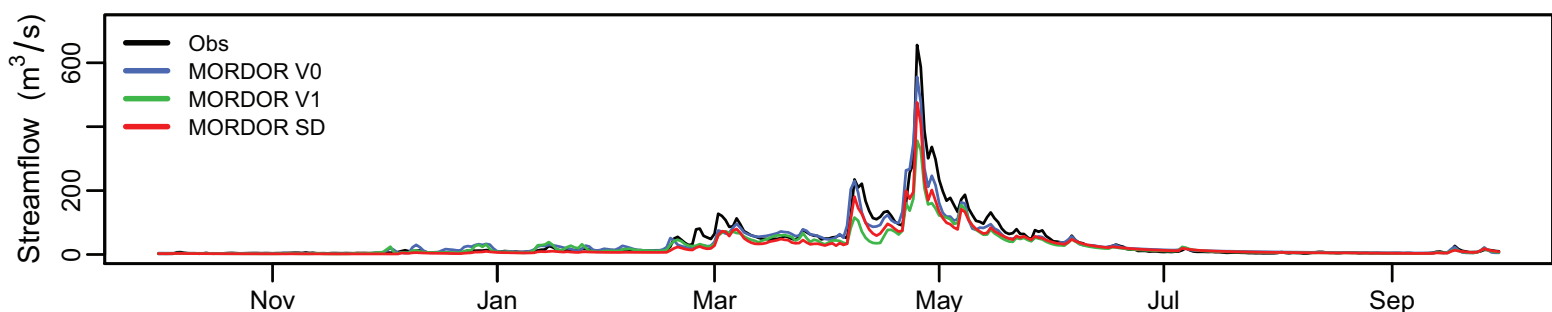

# Loire@Basset

Year 1987

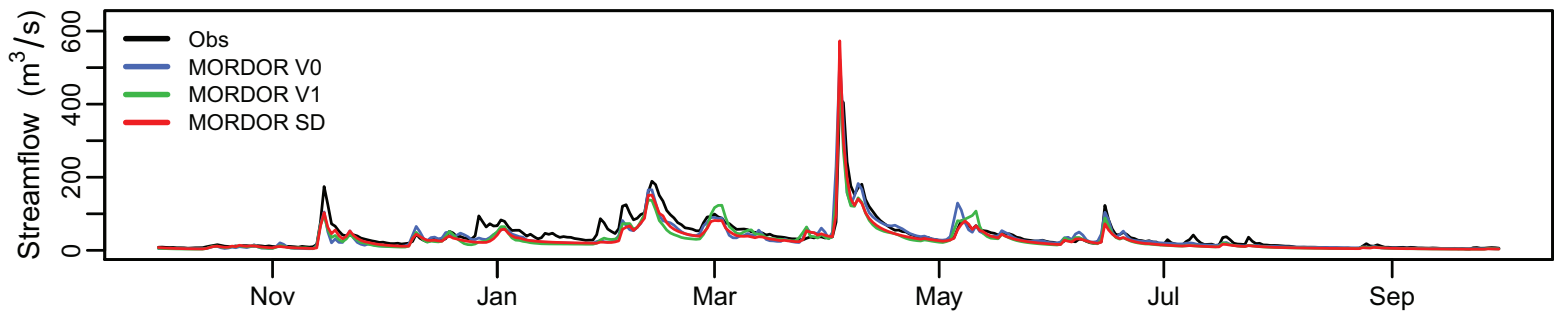

Year 1988

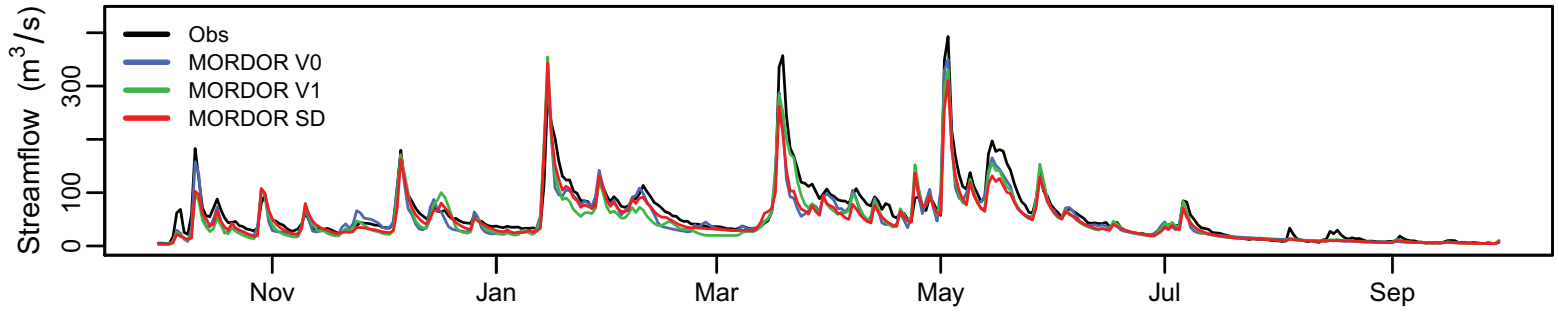

Year 1989

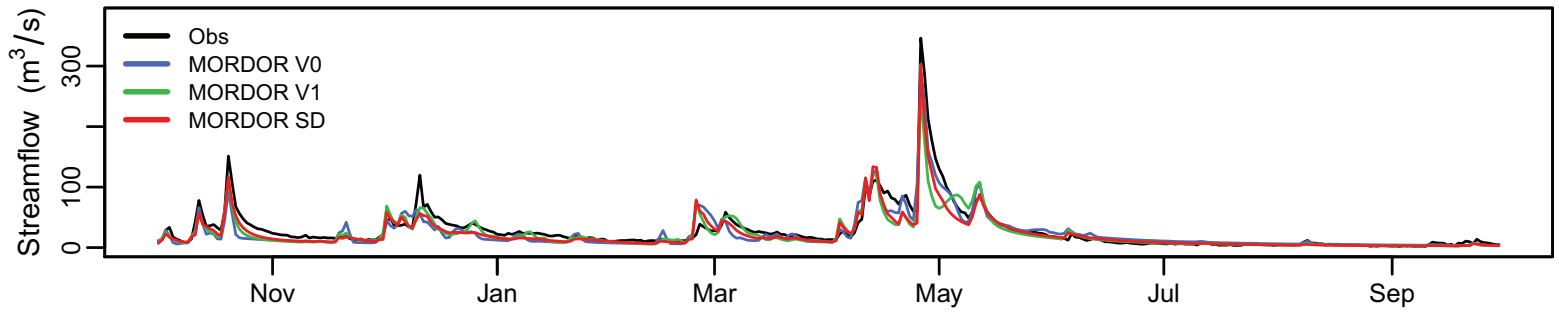

Year 1990

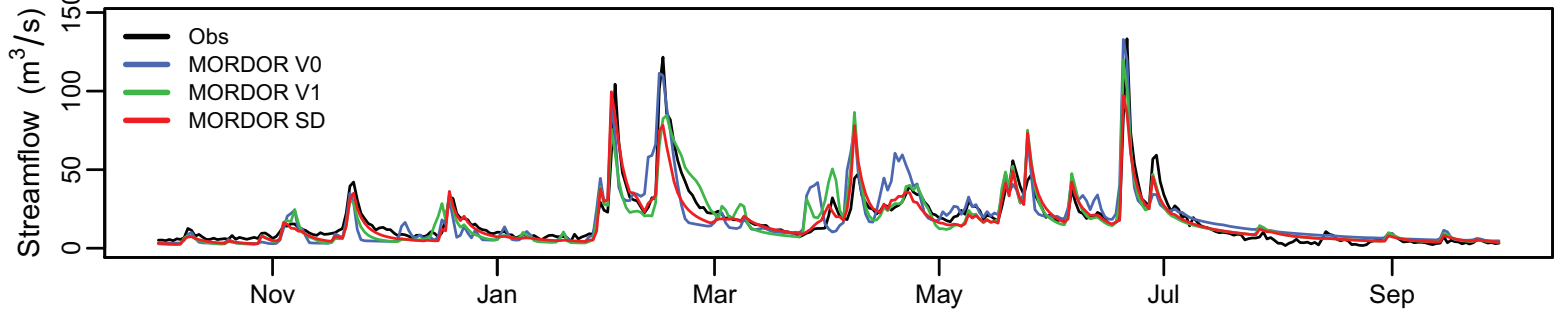

Year 1991

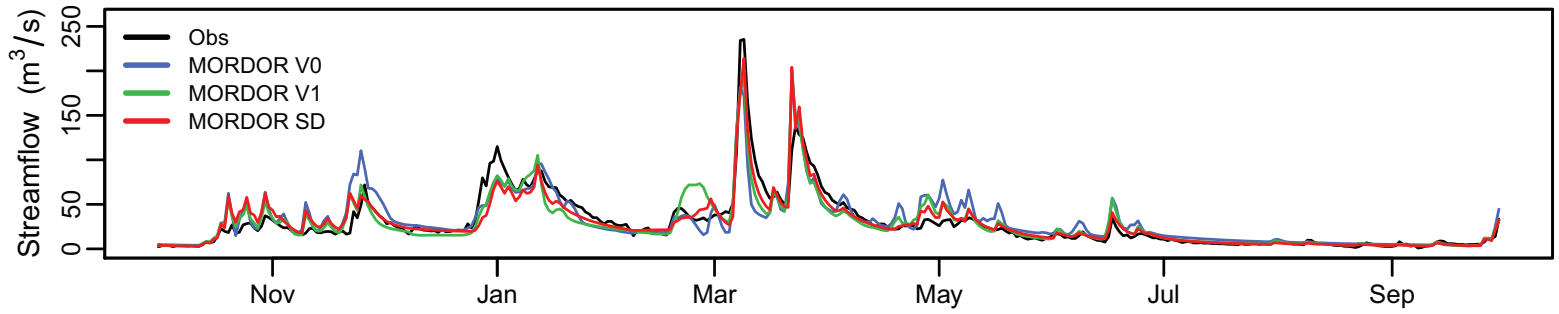

Year 1992

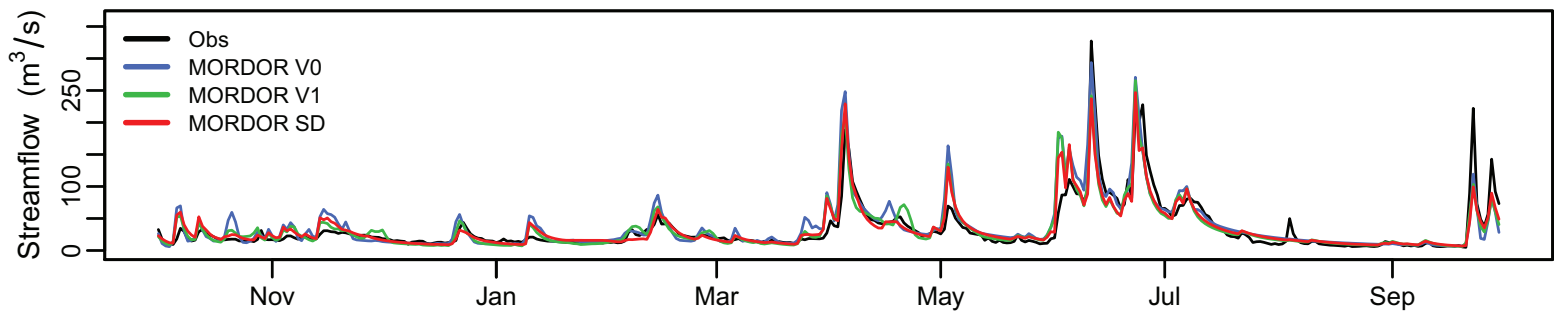

# Loire@Basset

Year 1993

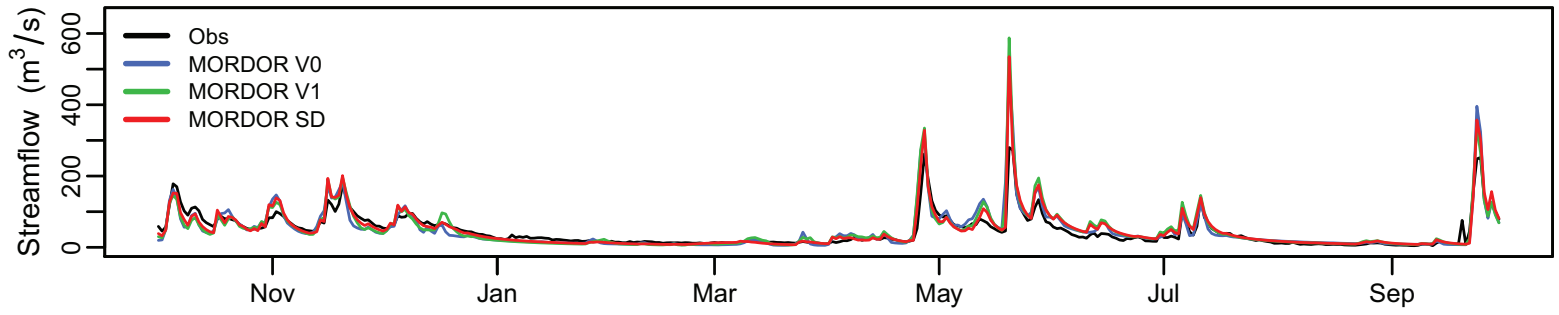

Year 1994

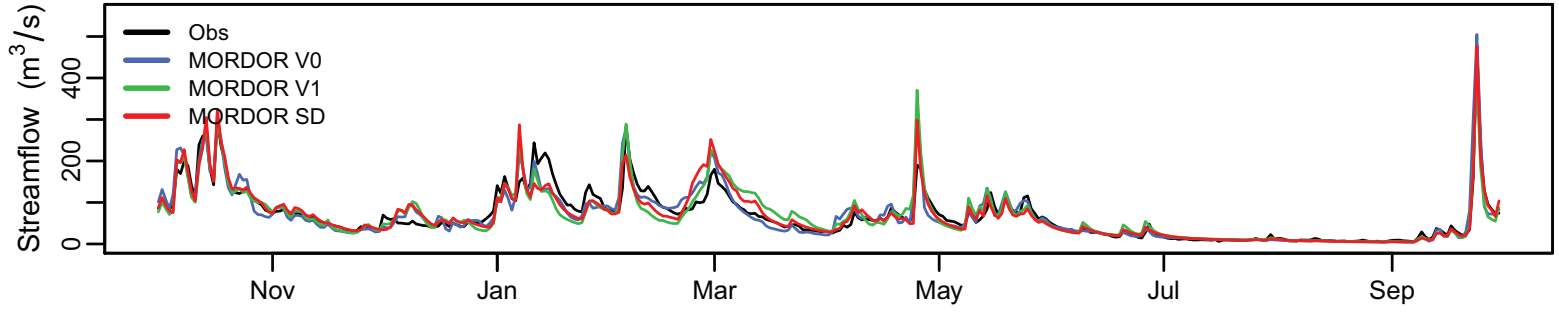

Year 1995

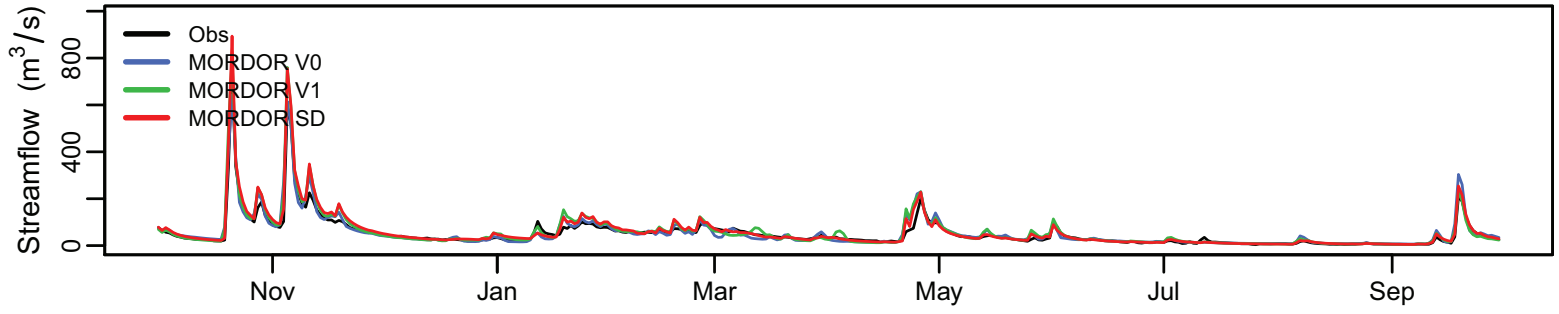

Year 1996

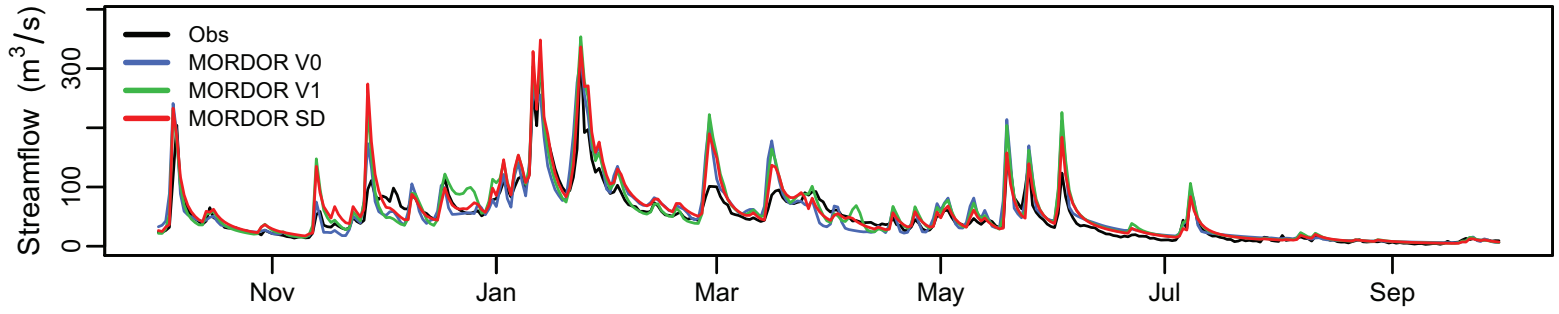

Year 1997

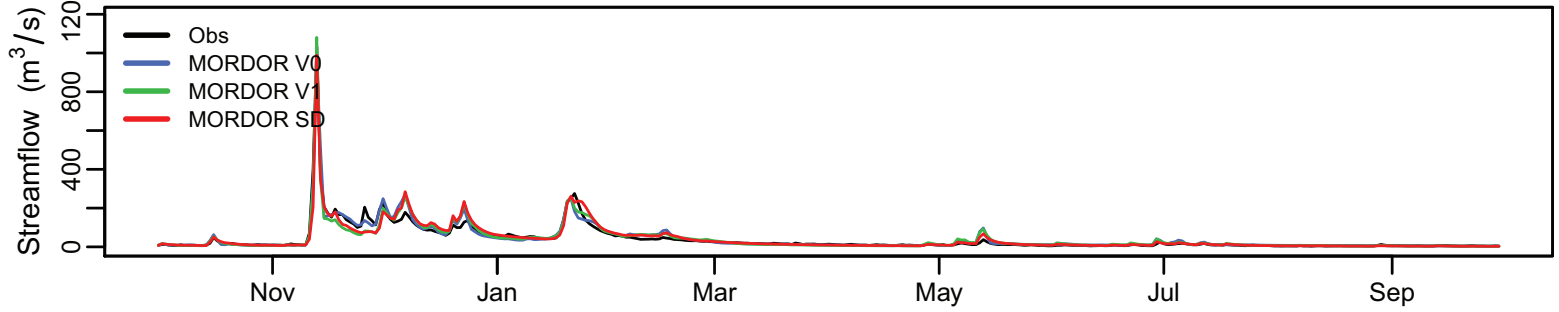

Year 1998

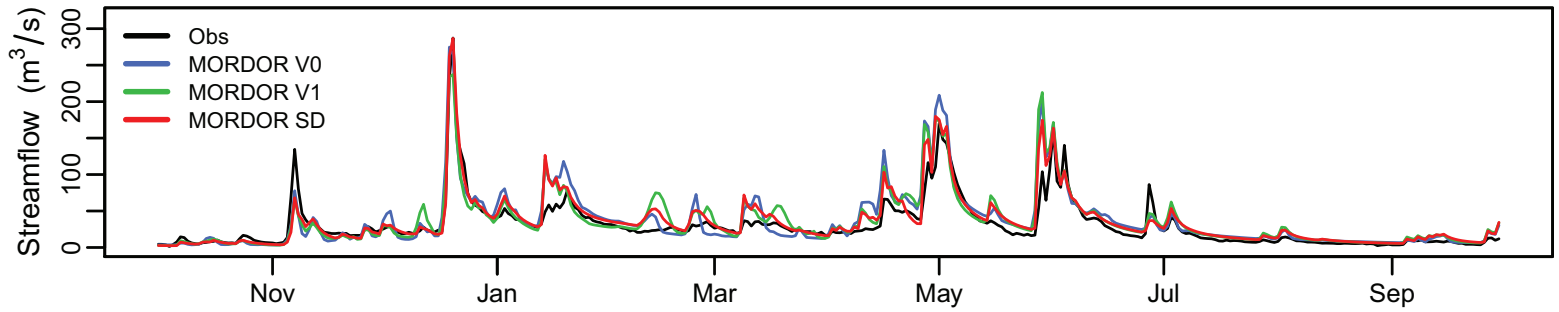

# Loire@Basset

Year 1999

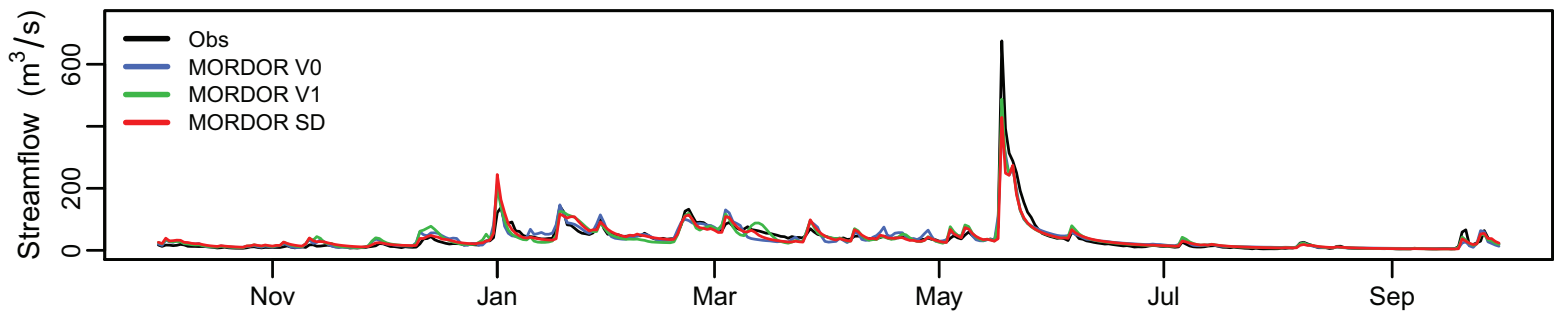

Year 2000

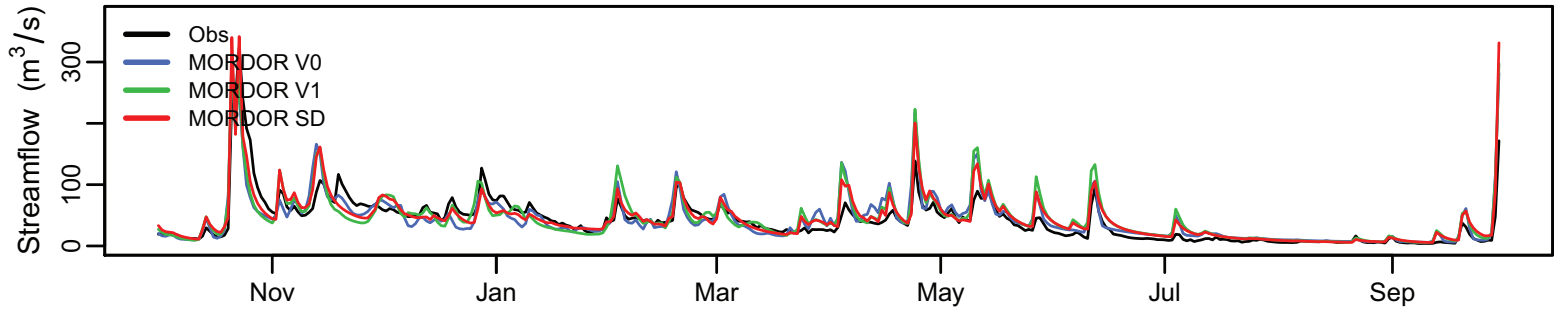

Year 2001

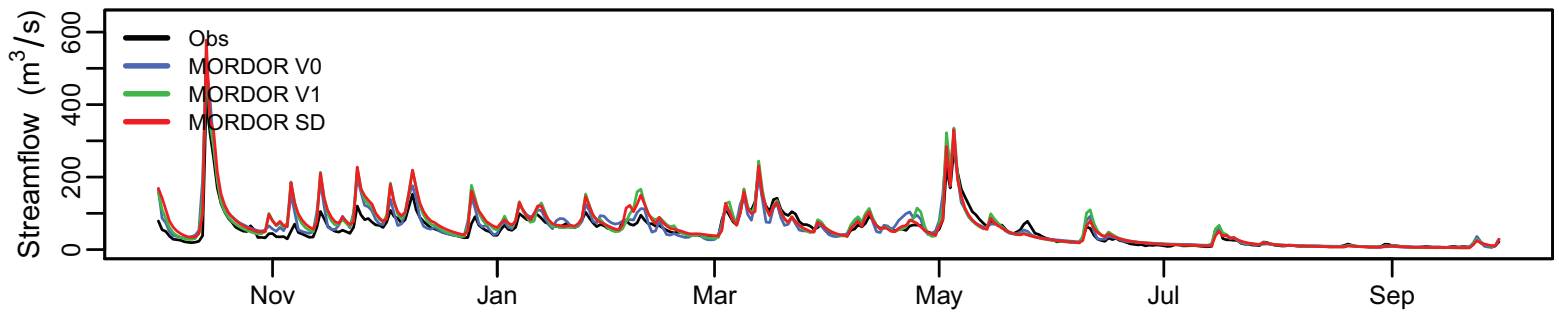

Year 2002

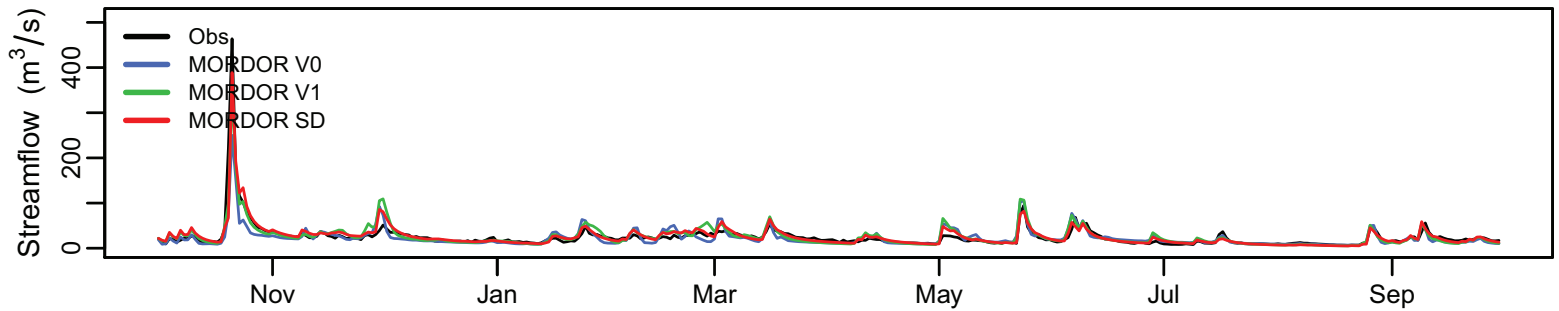

Year 2003

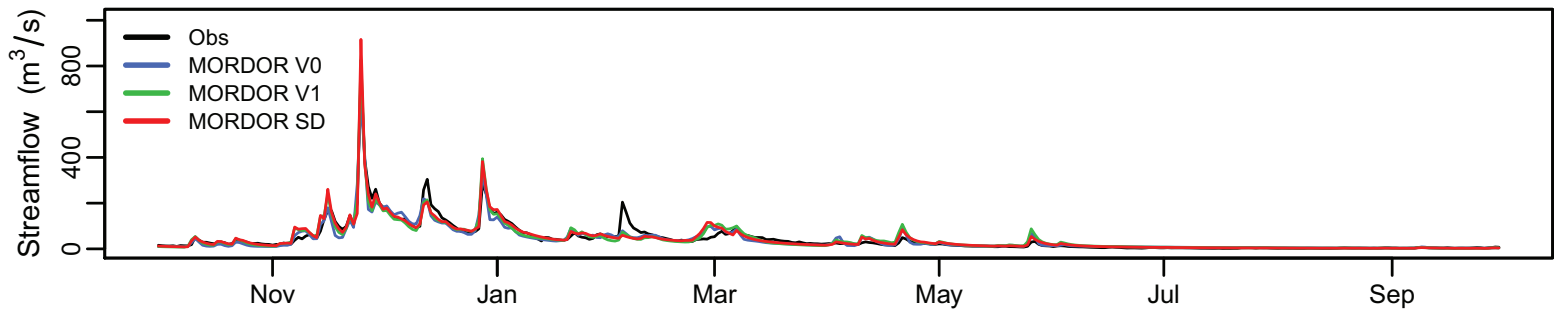

Year 2004

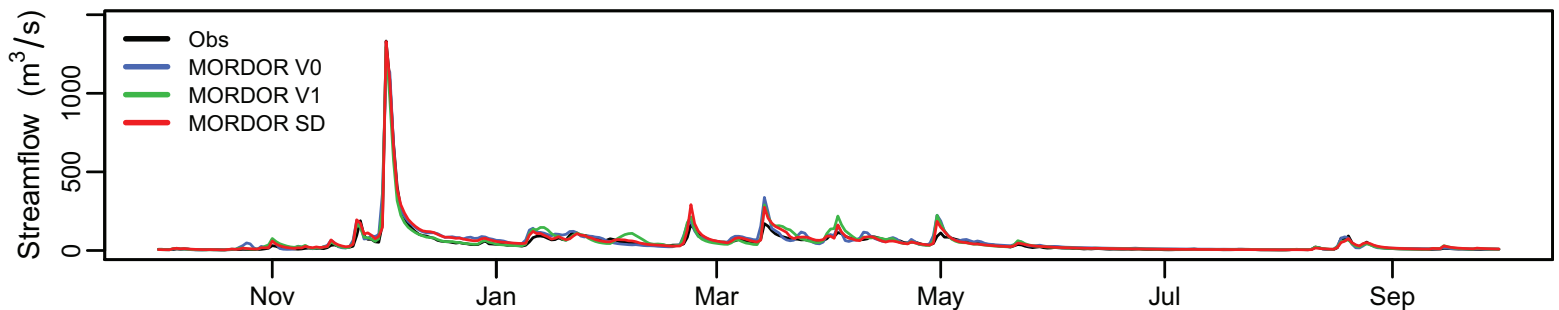

# Loire@Basset

Year 2005

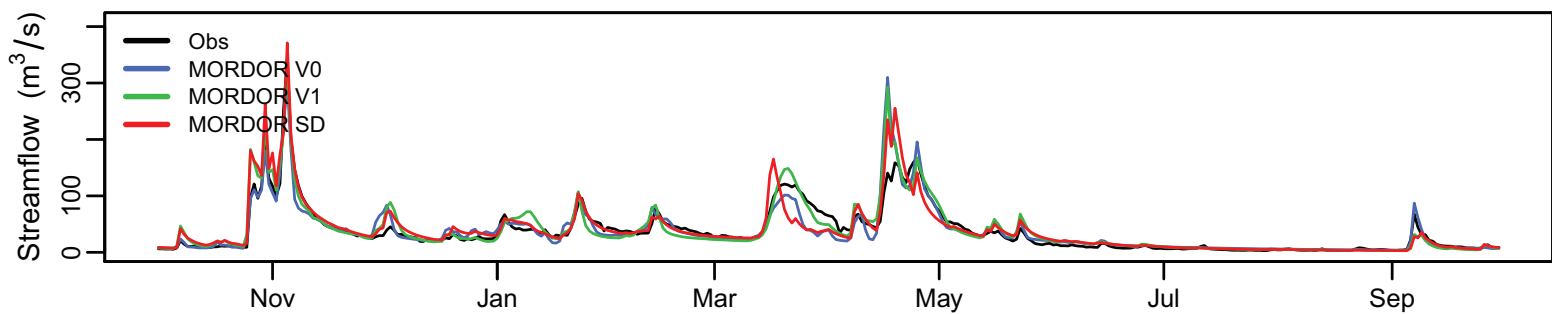

Year 2006

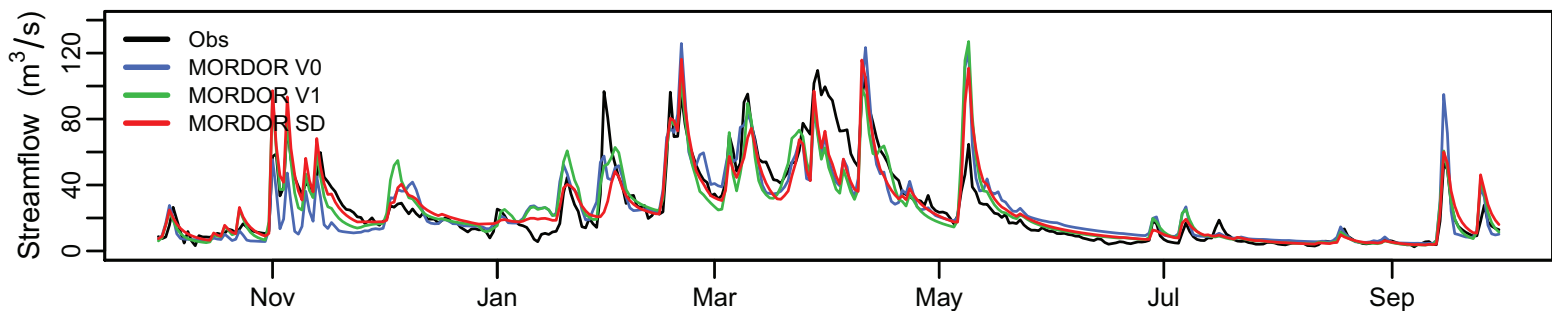

Year 2007

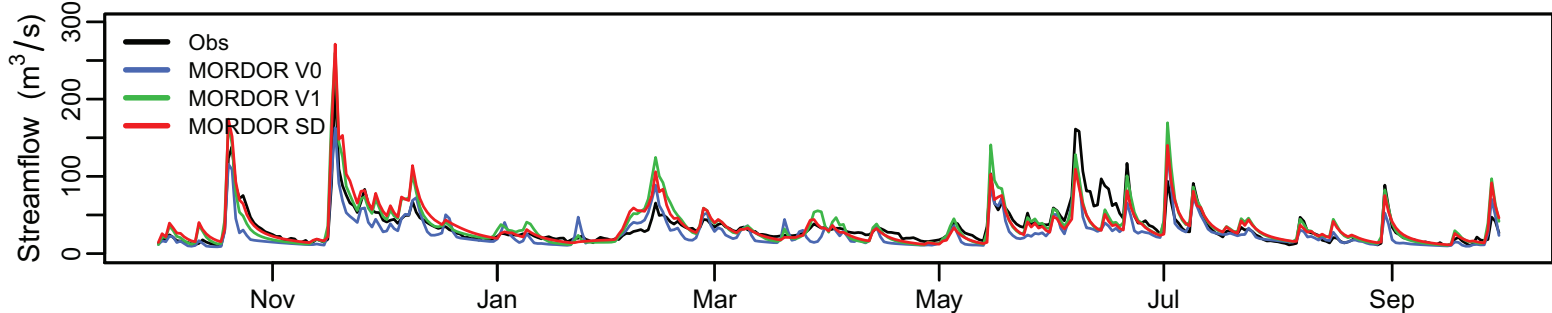

Year 2008

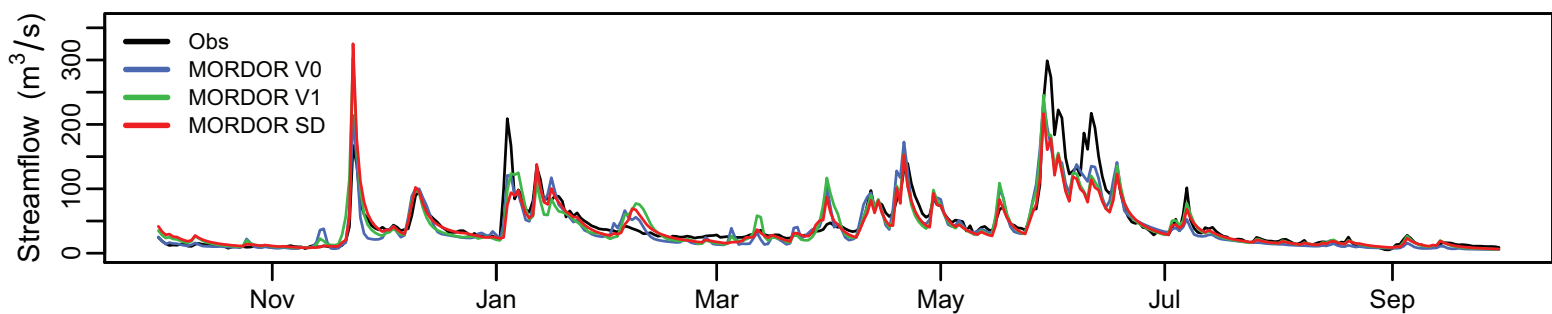

Year 2009

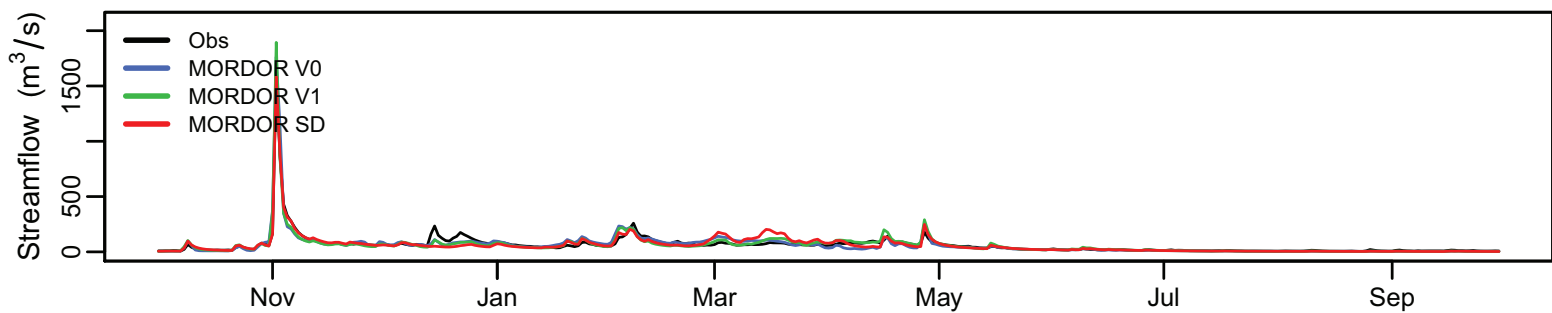

Year 2010

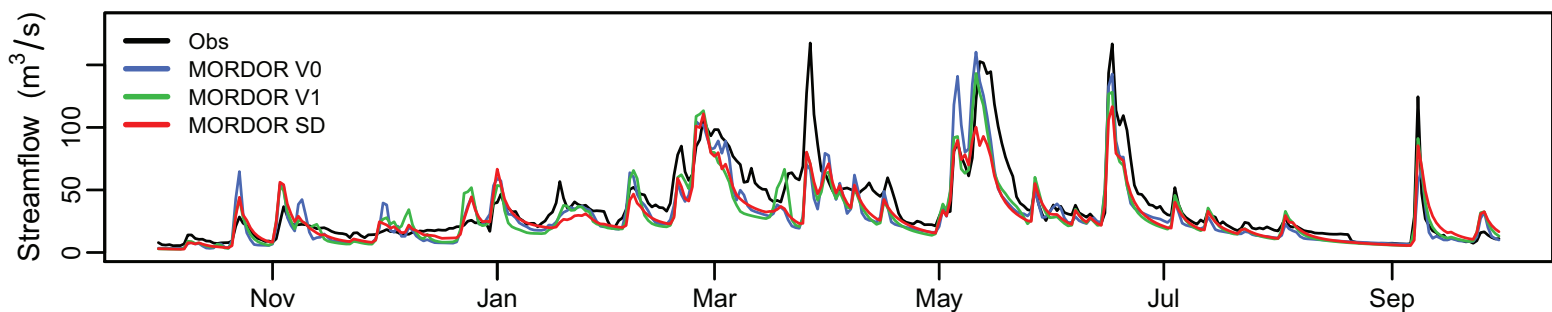

# Loire@LaPalisse

Year 1993

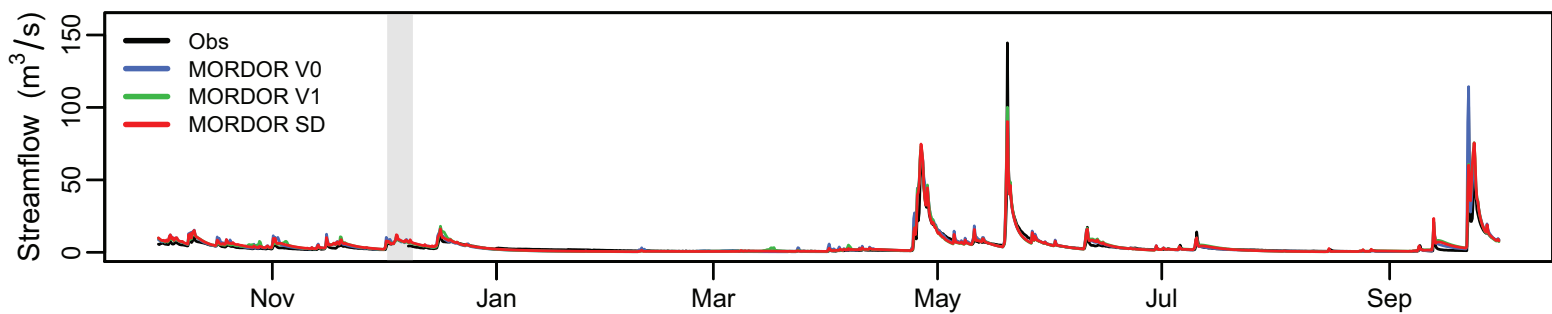

Year 1994

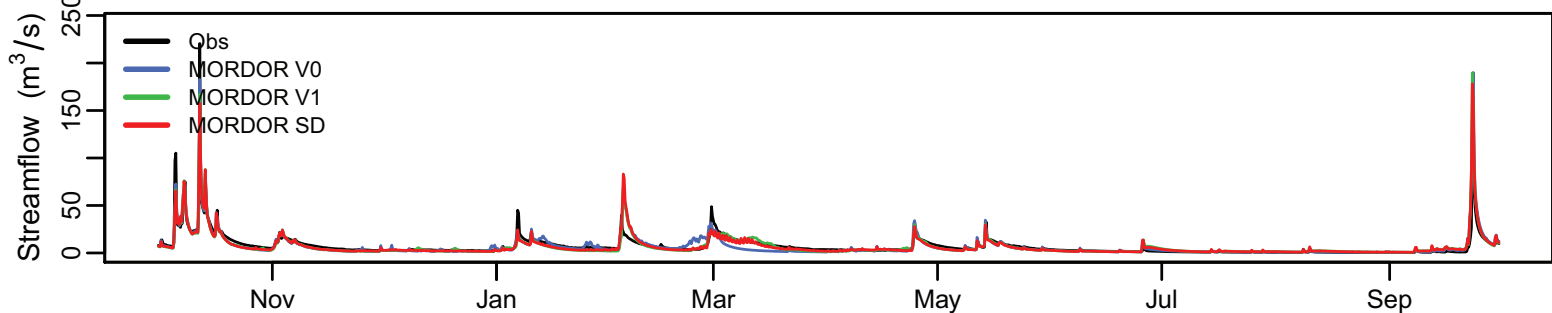

Year 1995

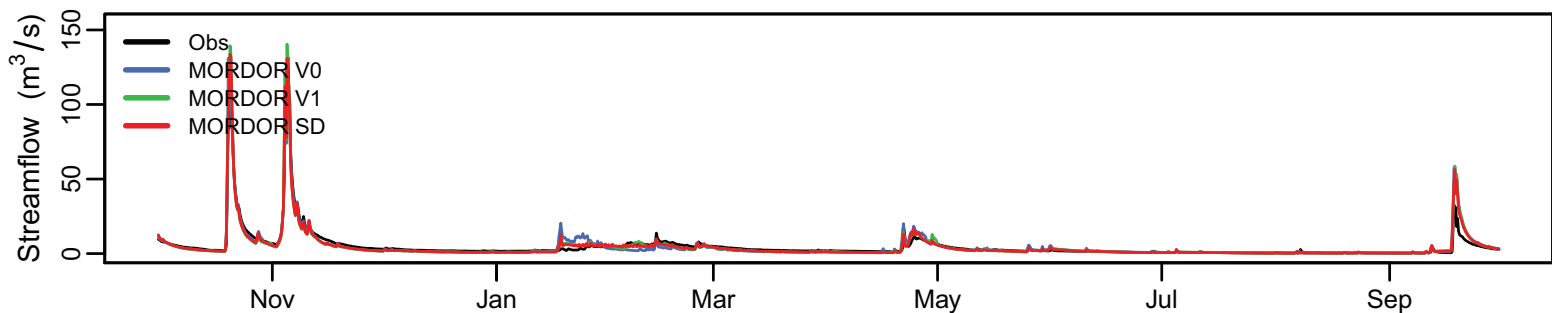

Year 1996

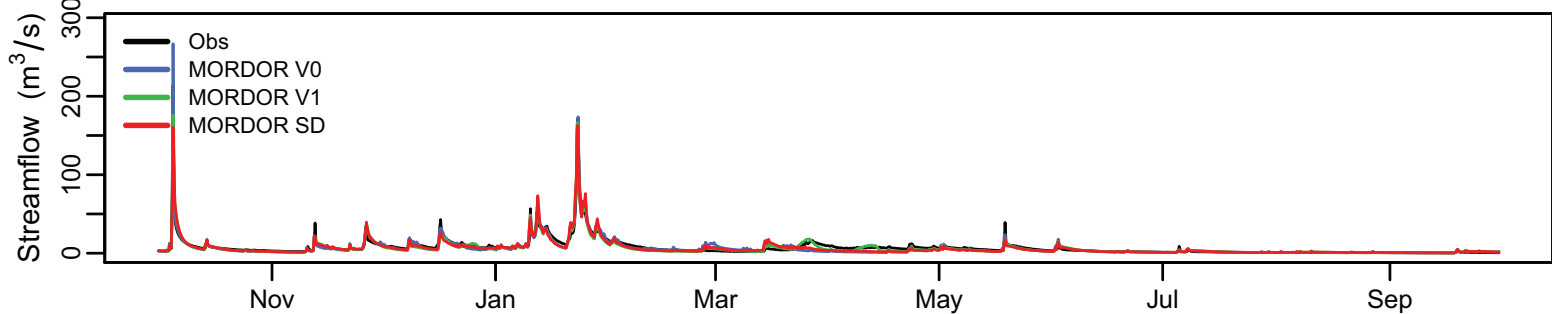

Year 1997

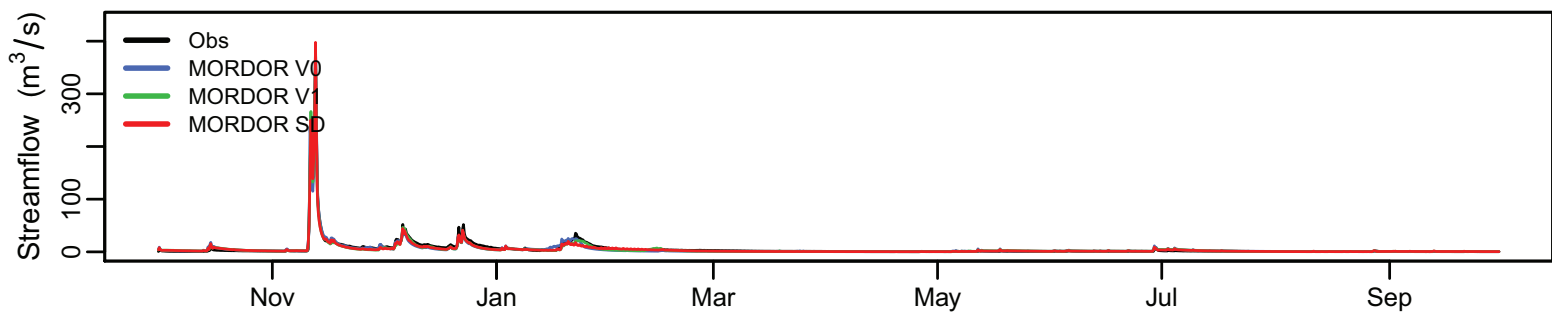

Year 1998

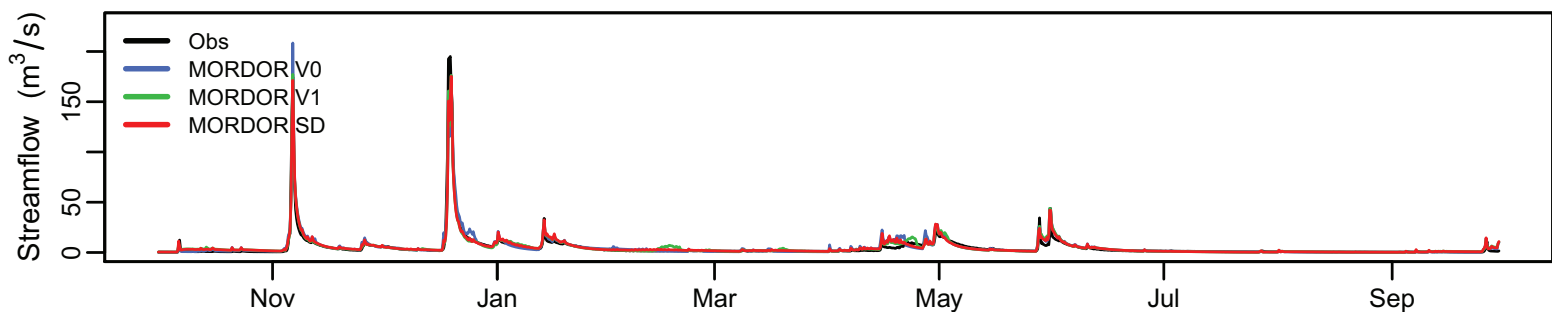

# Loire@LaPalisse

Year 1999

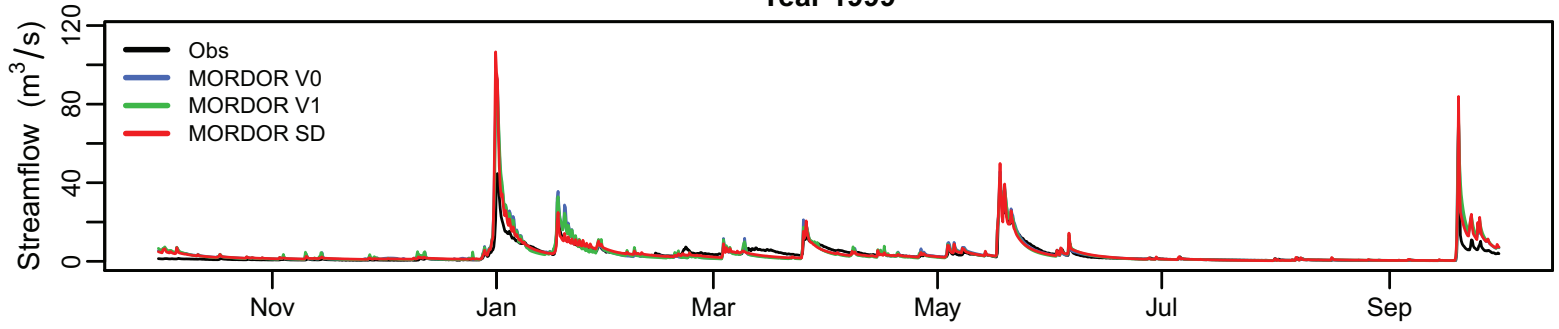

Year 2000

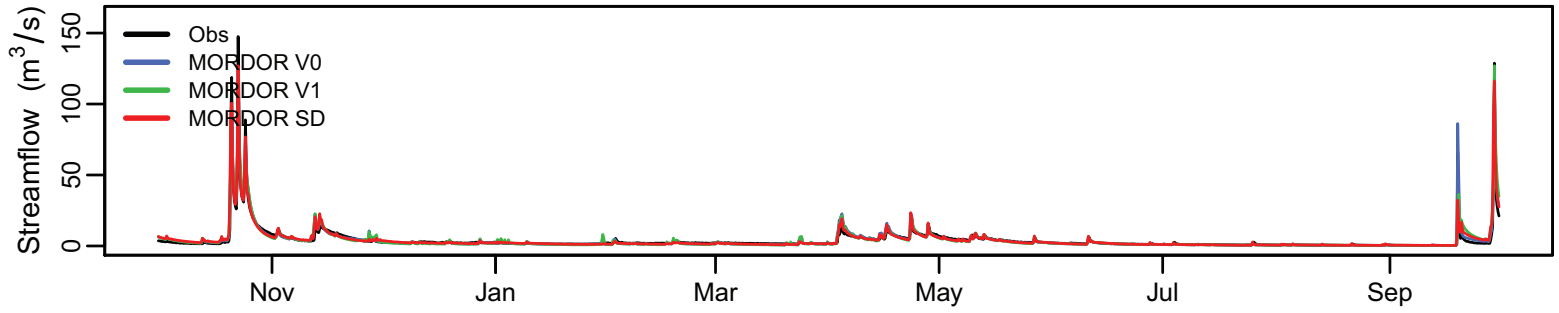

Year 2001

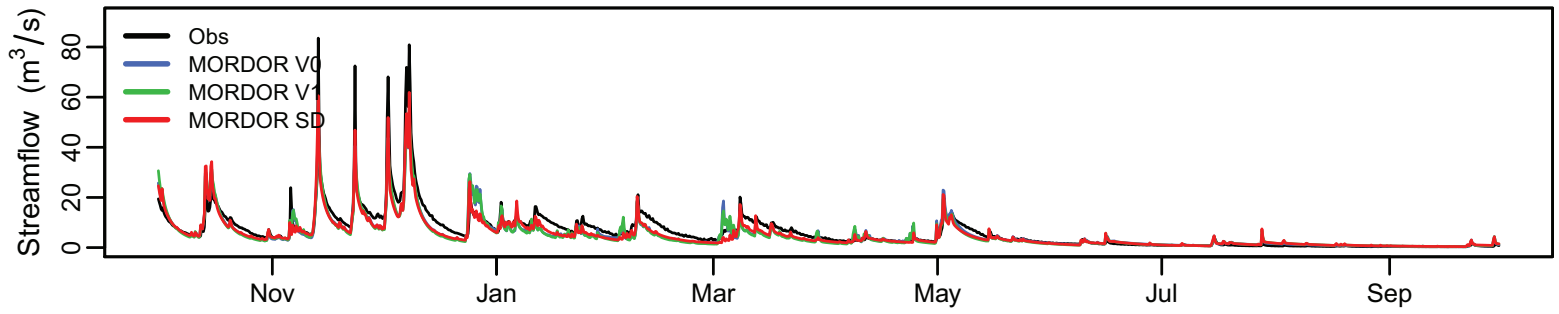

Year 2002

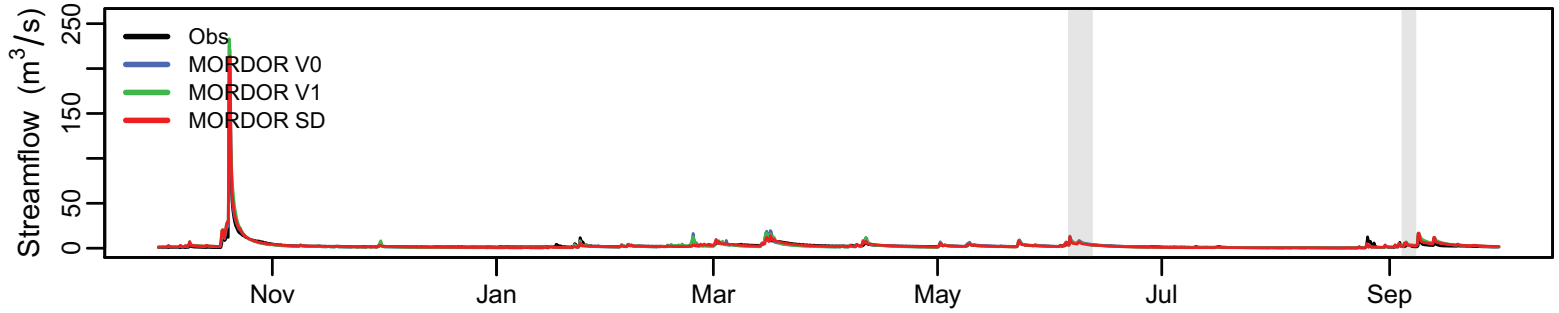

Year 2003

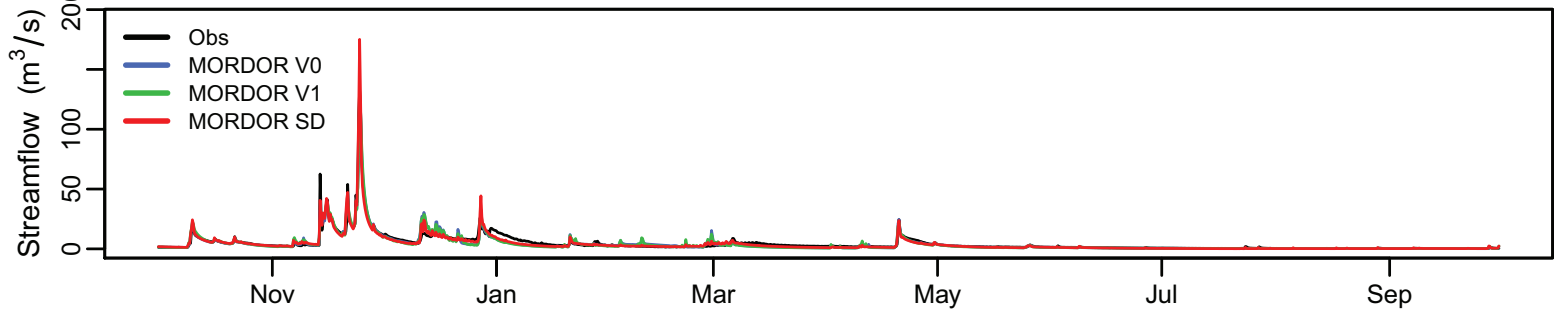

Year 2004

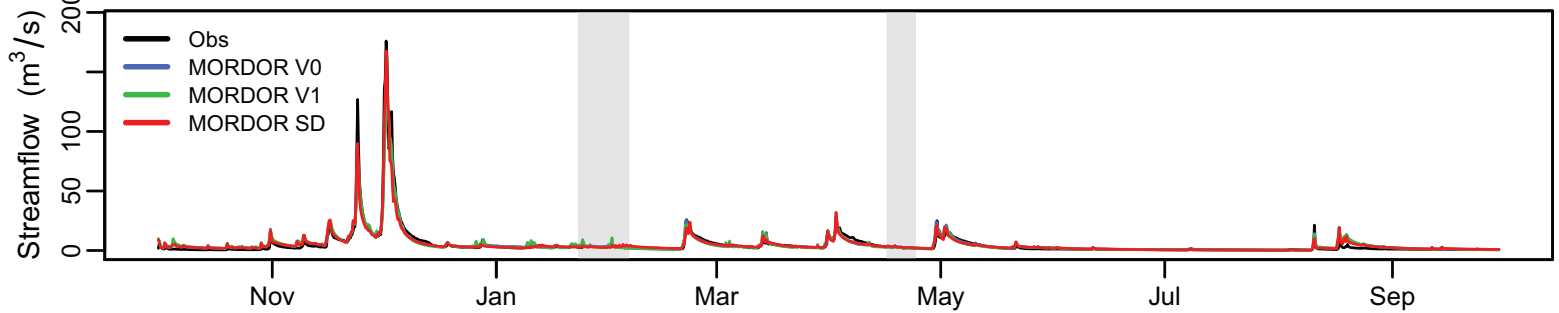



# Lot@Castelnau

Year 1983

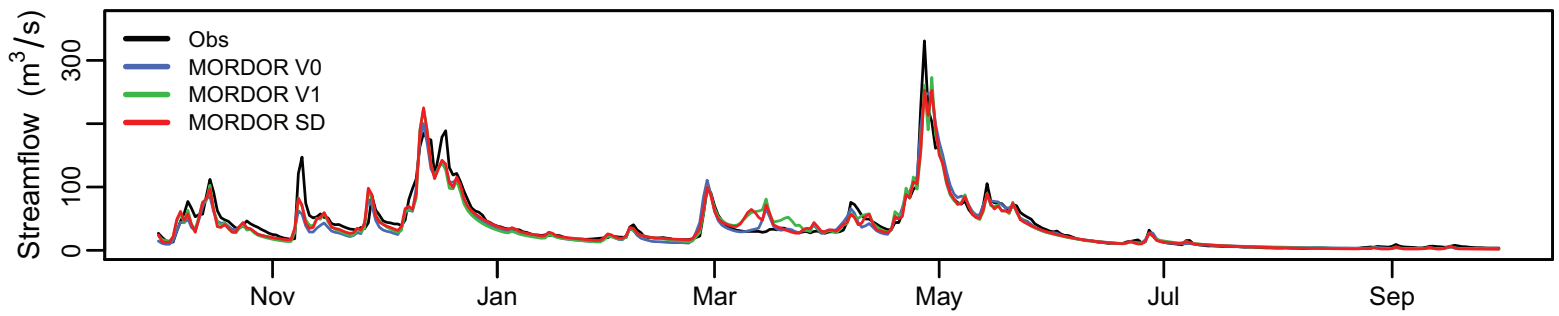

Year 1984

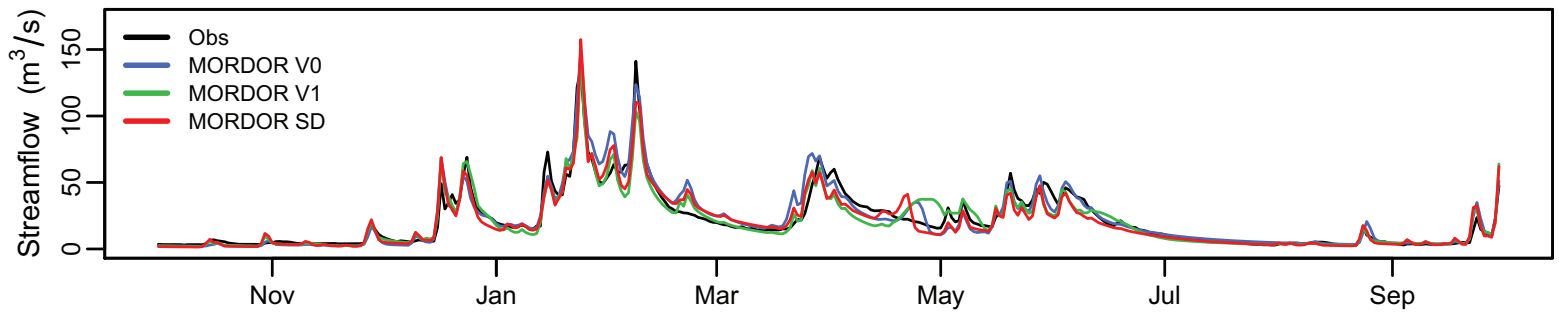

Year 1985

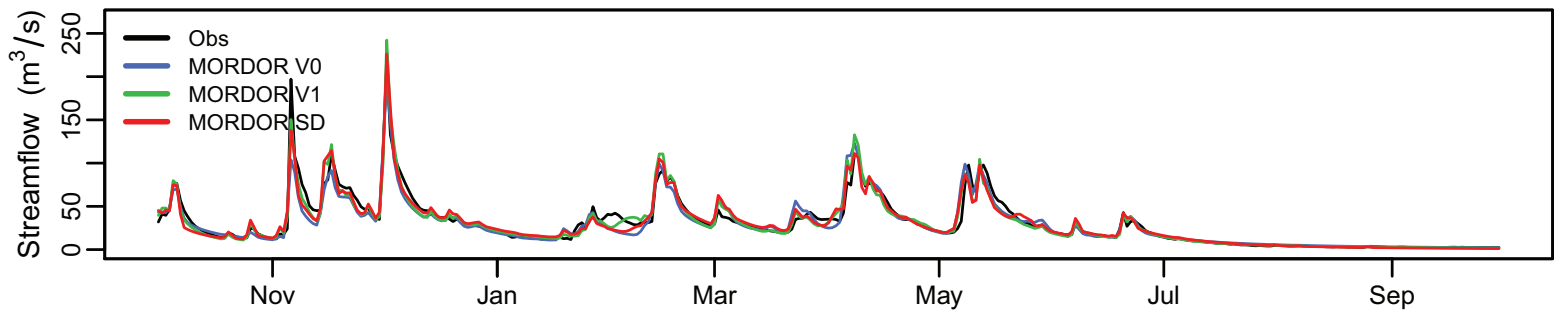

Year 1986

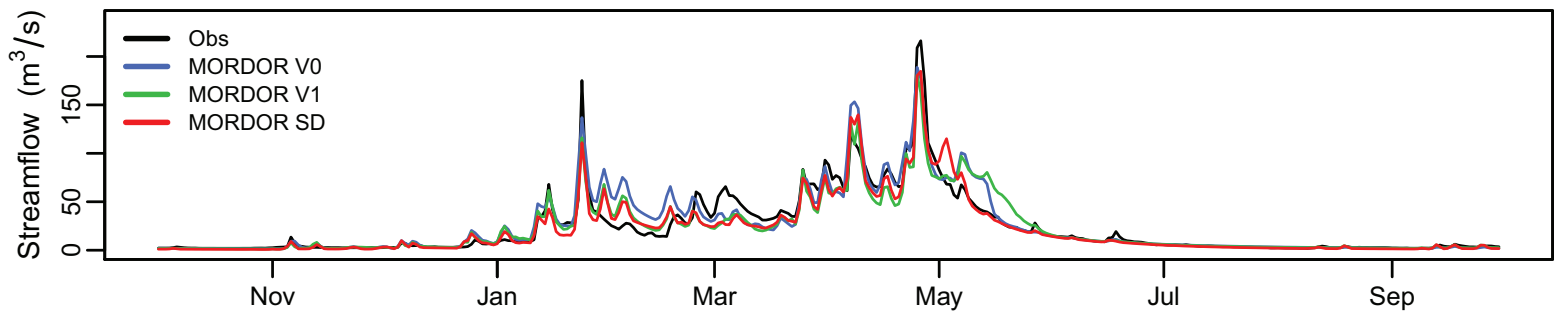

Year 1987

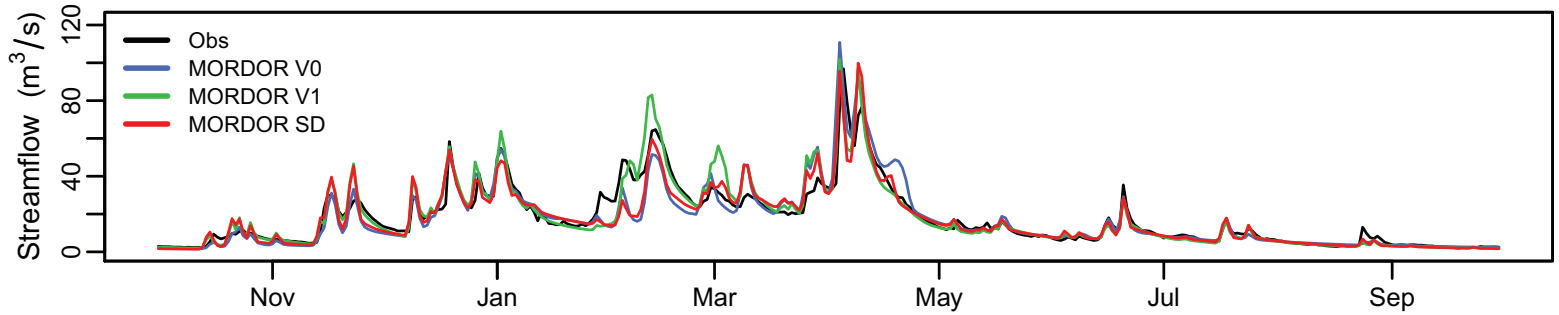

Year 1988

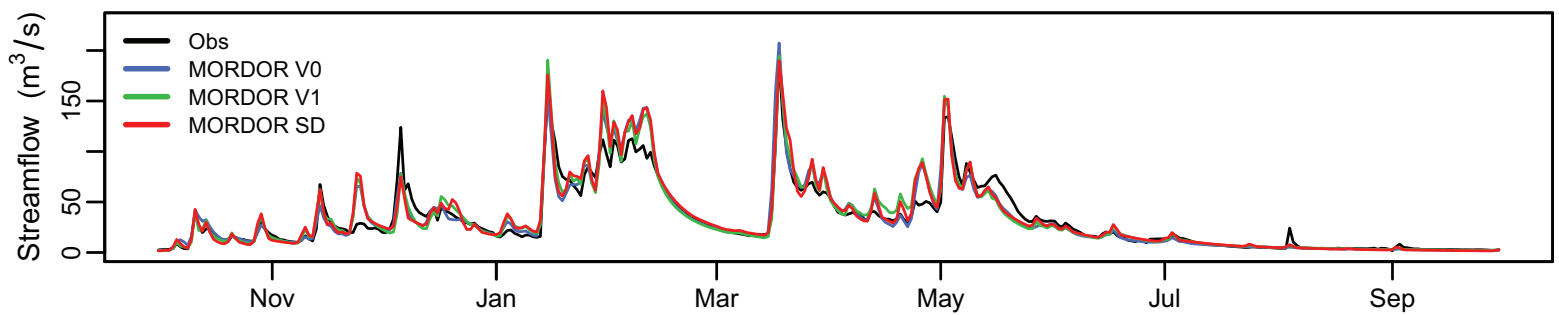

# Lot@Castelnau

Year 1989

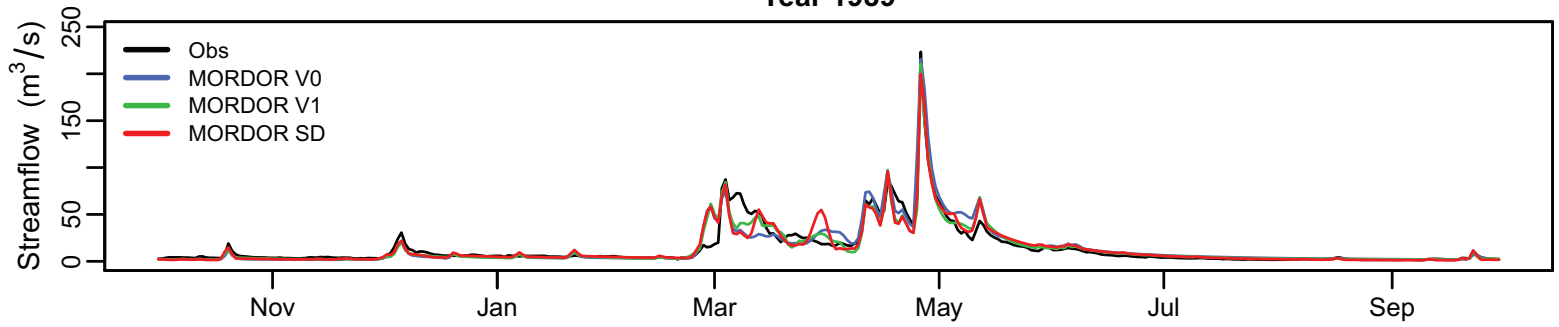

Year 1990

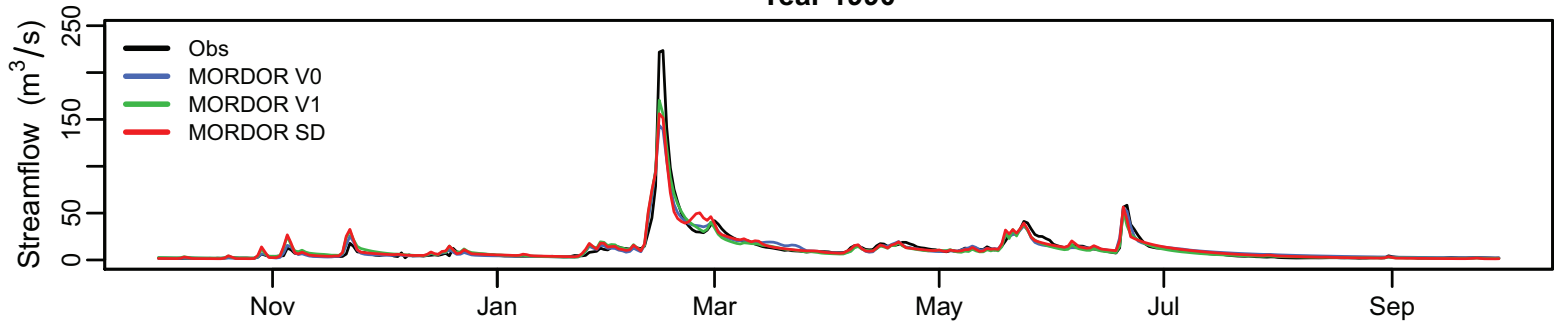

Year 1991

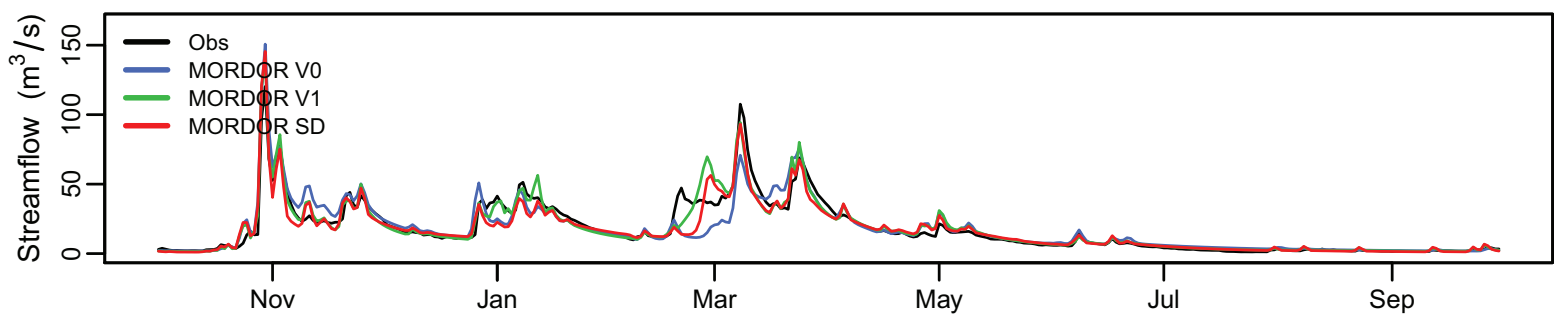

Year 1992

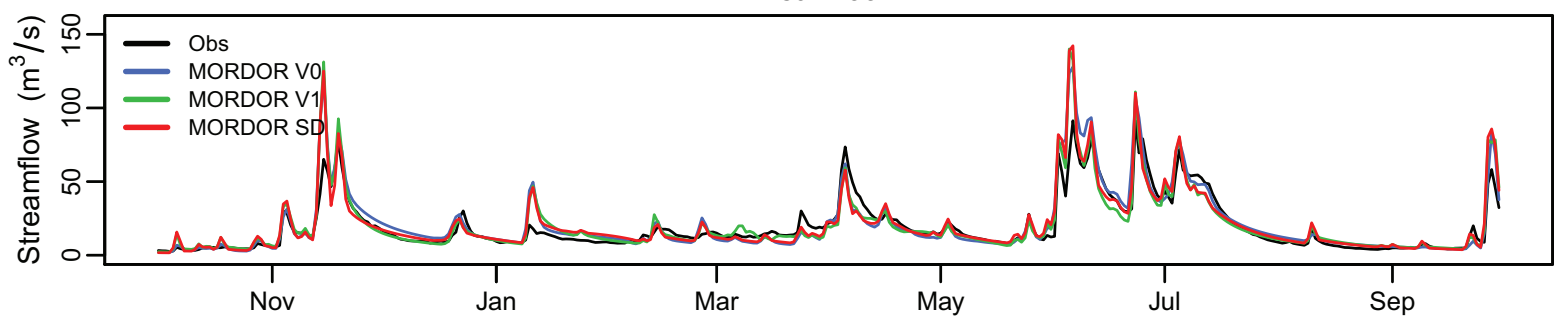

Year 1993

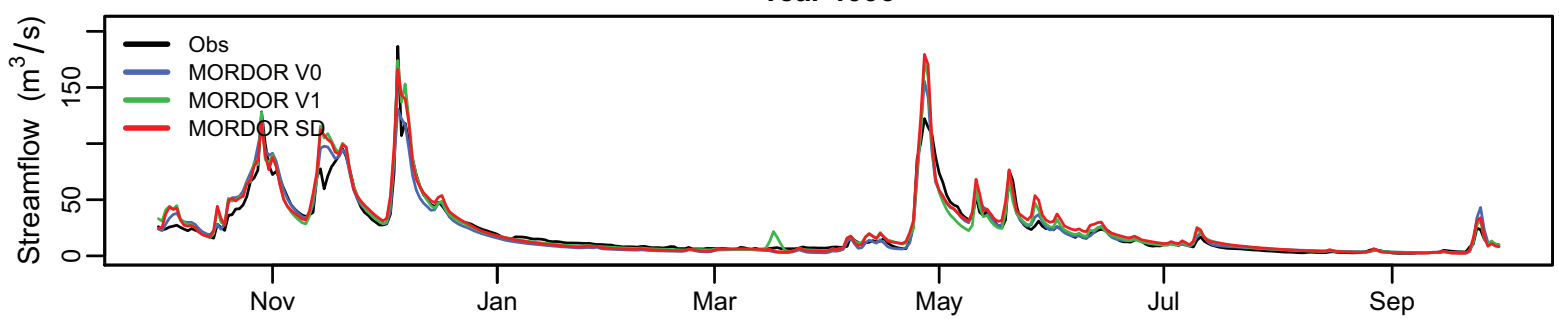

Year 1994

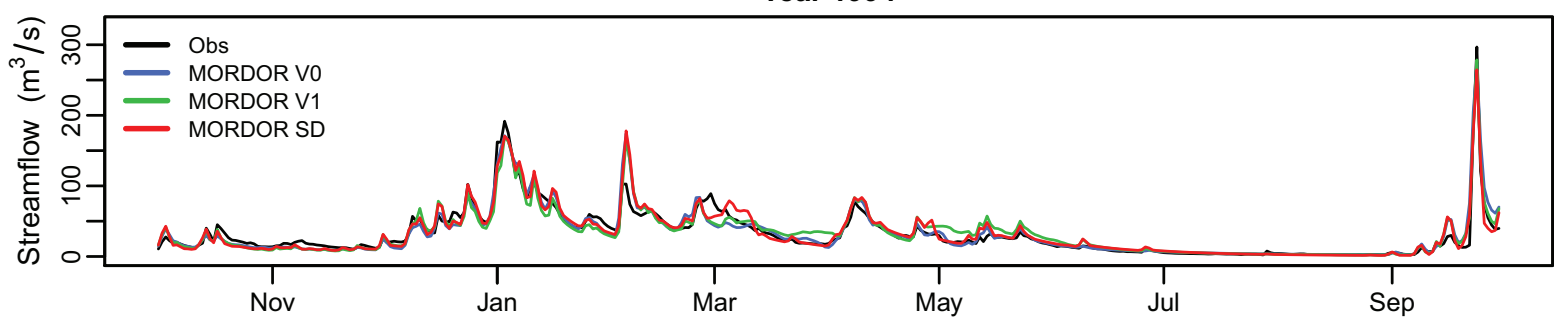

# Lot@Castelnau

Year 1995

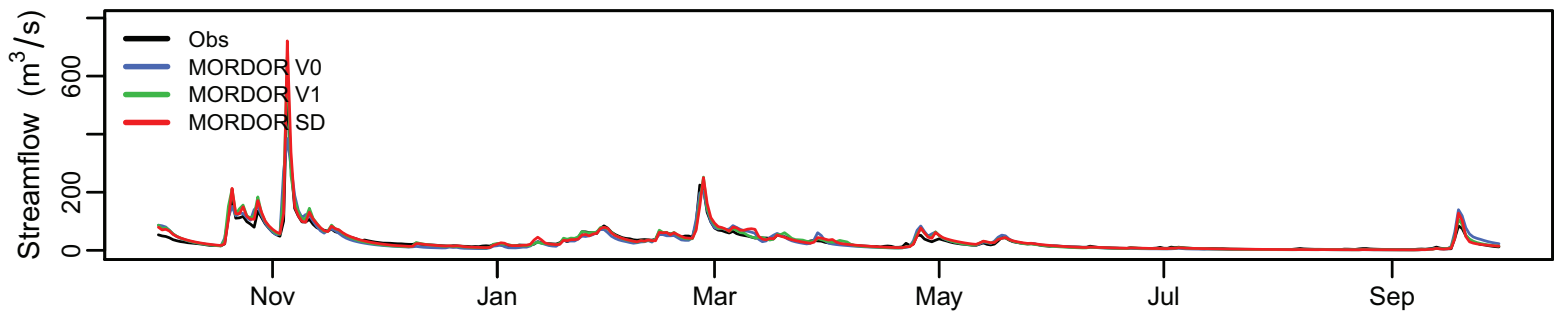

Year 1996

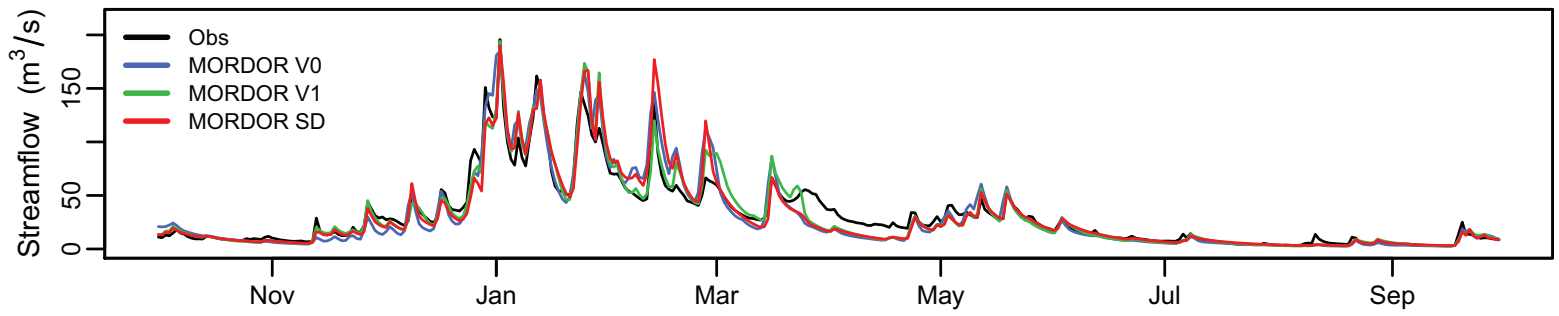

Year 1997

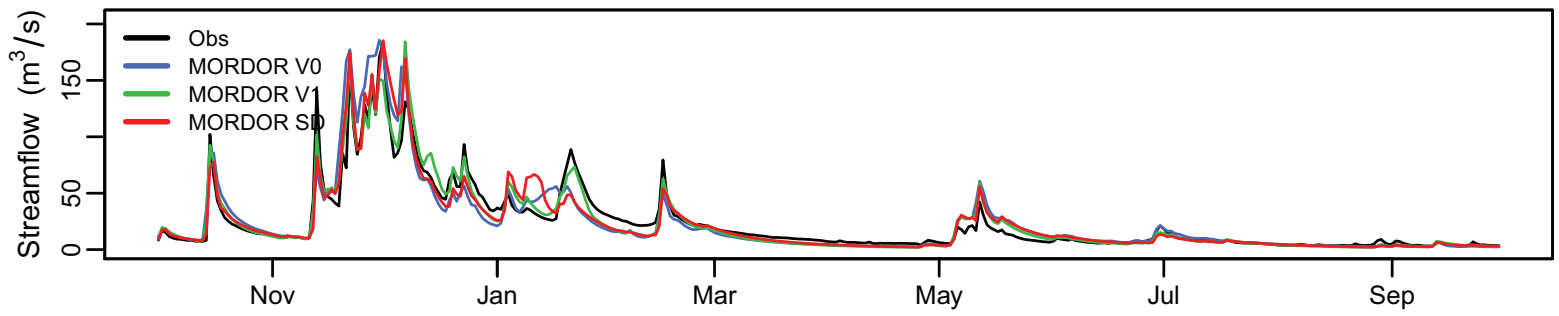

Year 1998

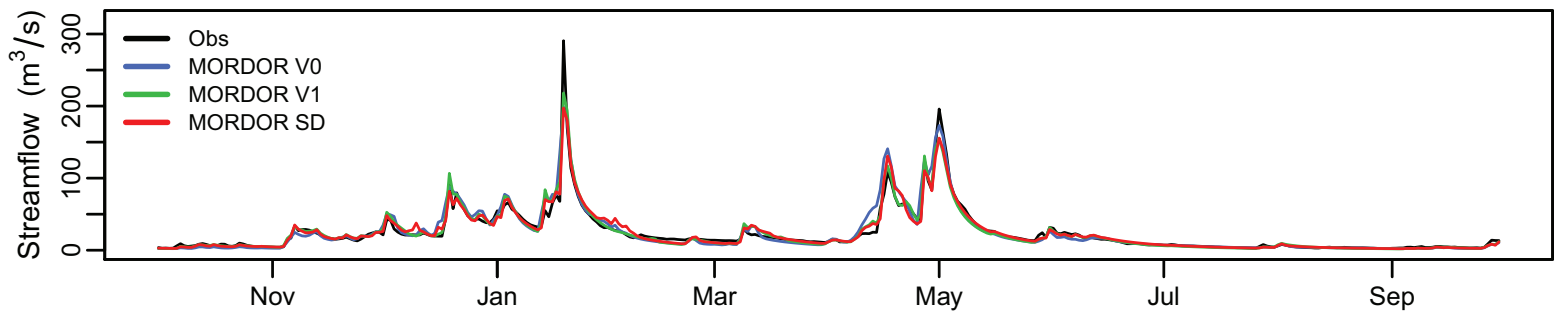

Year 1999

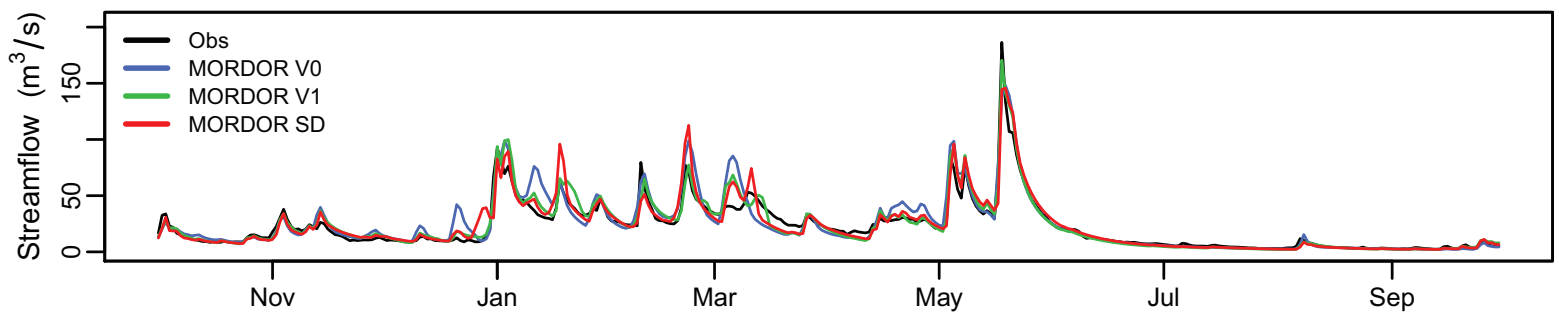

Year 2000

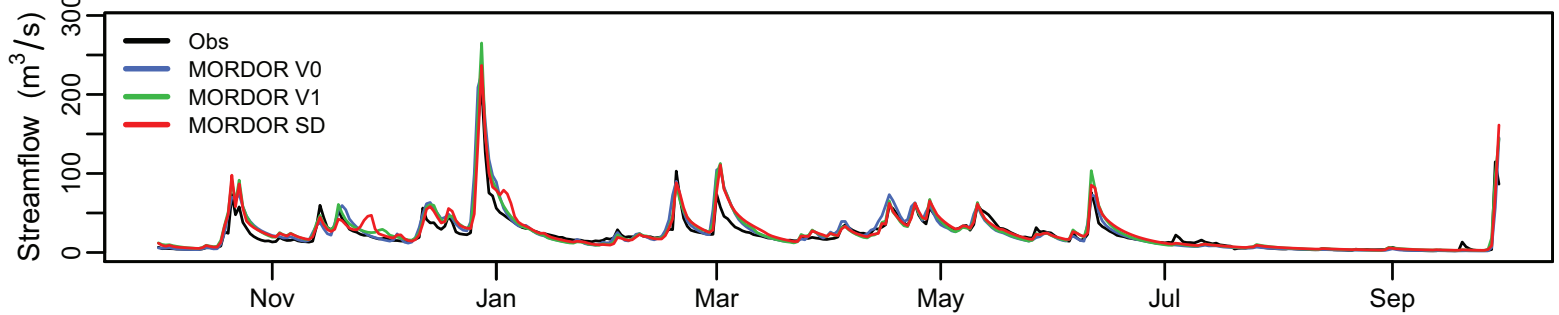

# Lot@Castelnau

Year 2001

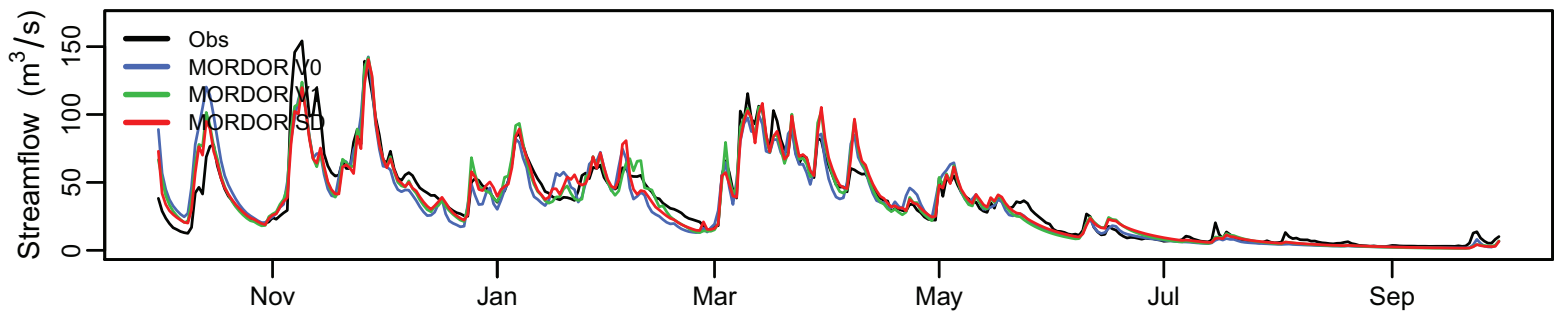

Year 2002

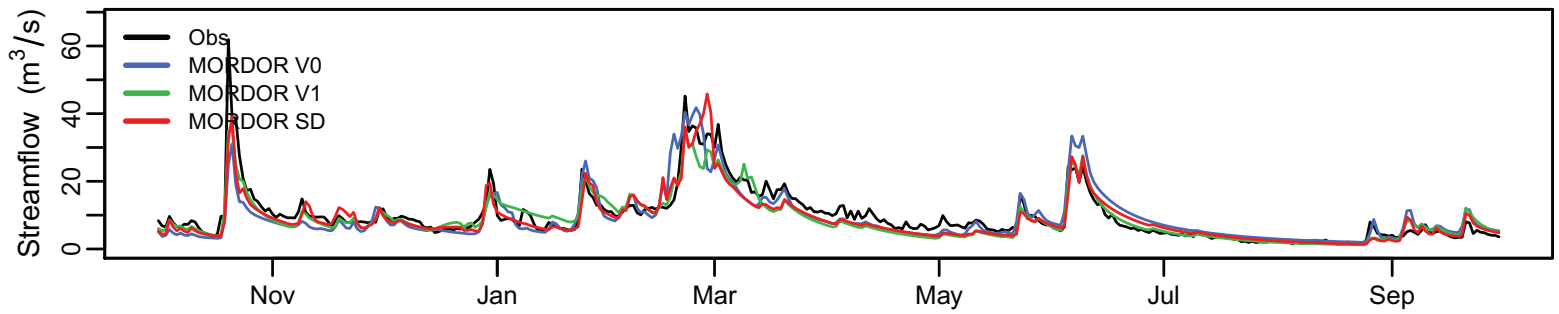

Year 2003

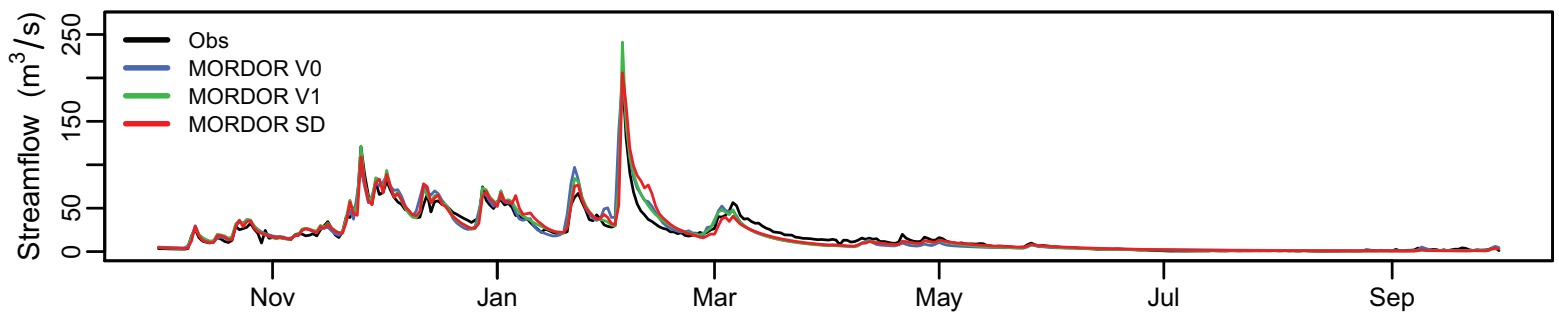

Year 2004

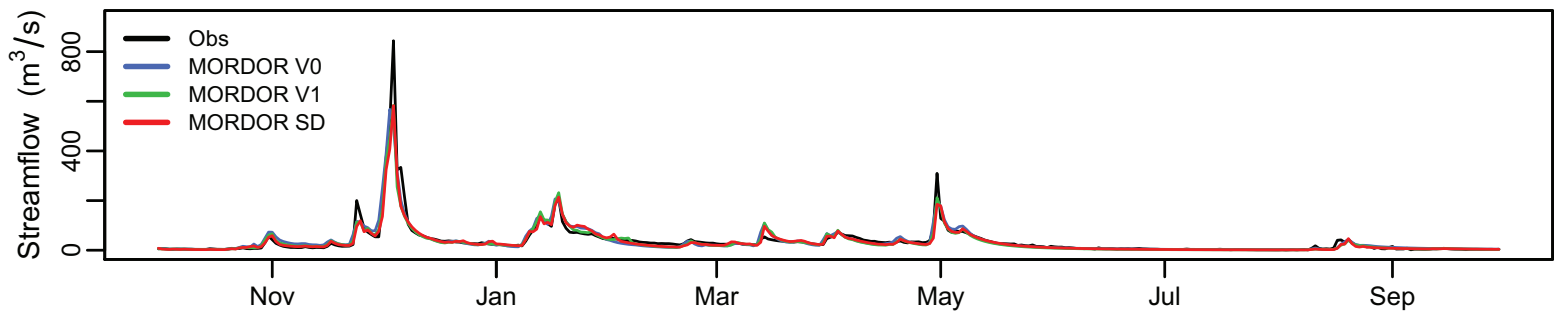

Year 2005

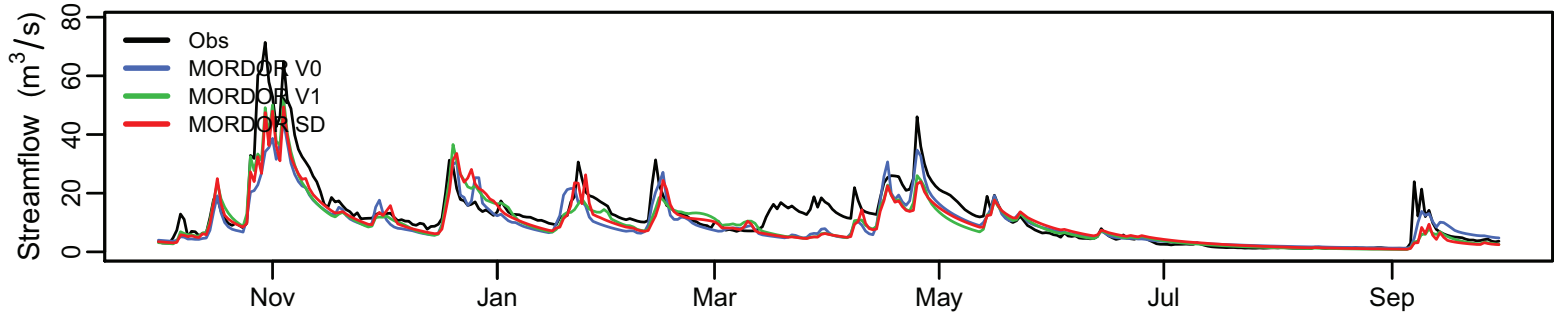

# Mimente@Florac

Year 1986

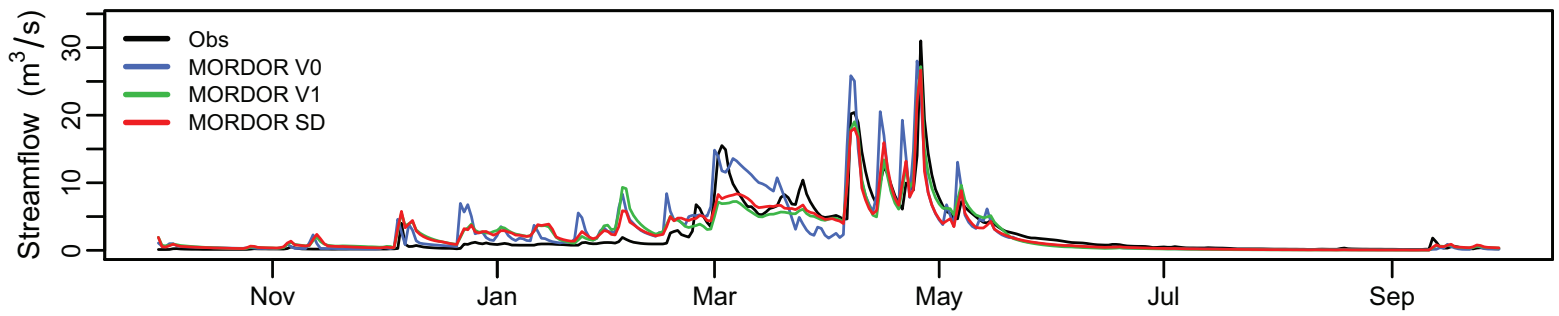

Year 1987

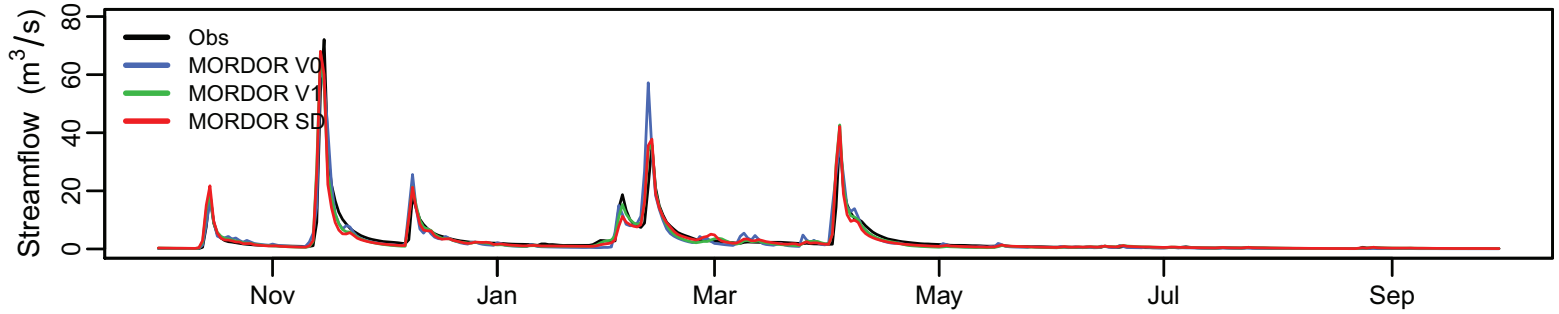

Year 1988

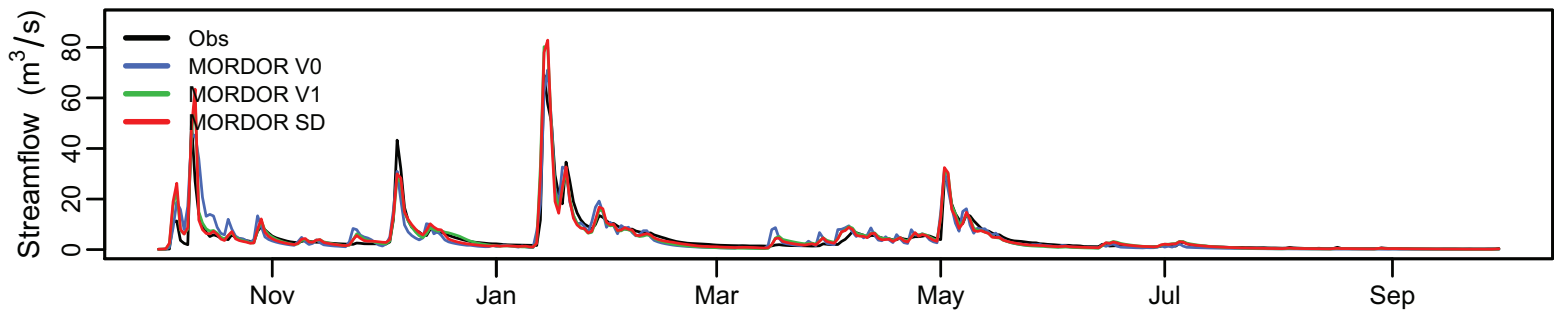

Year 1989

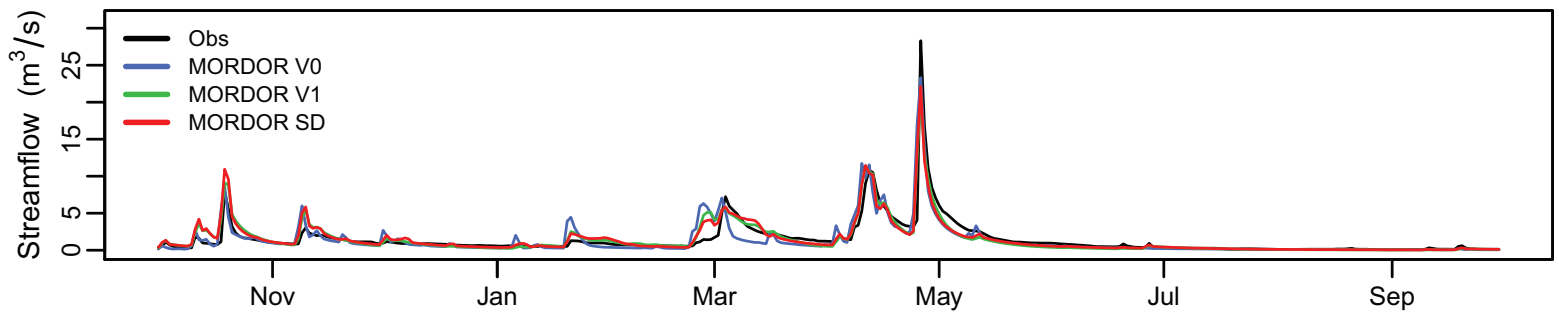

Year 1990

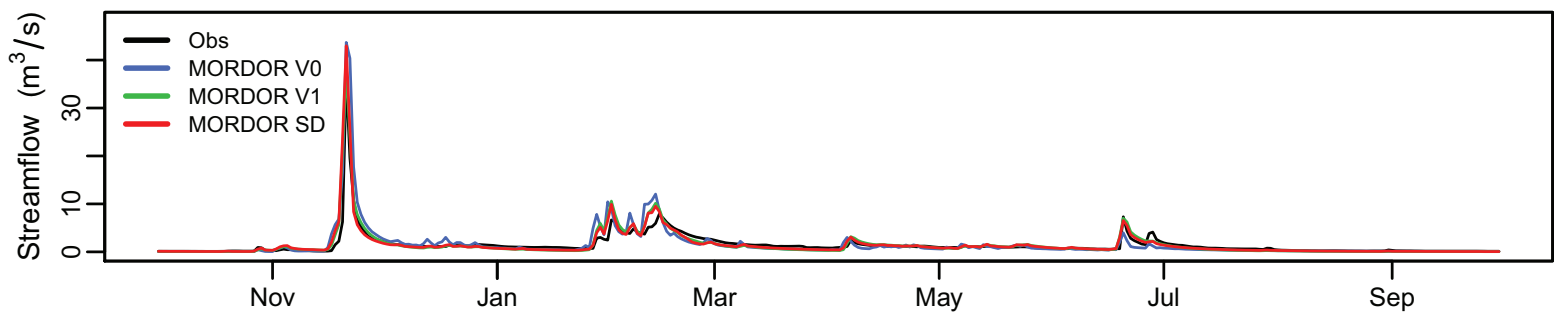

Year 1991

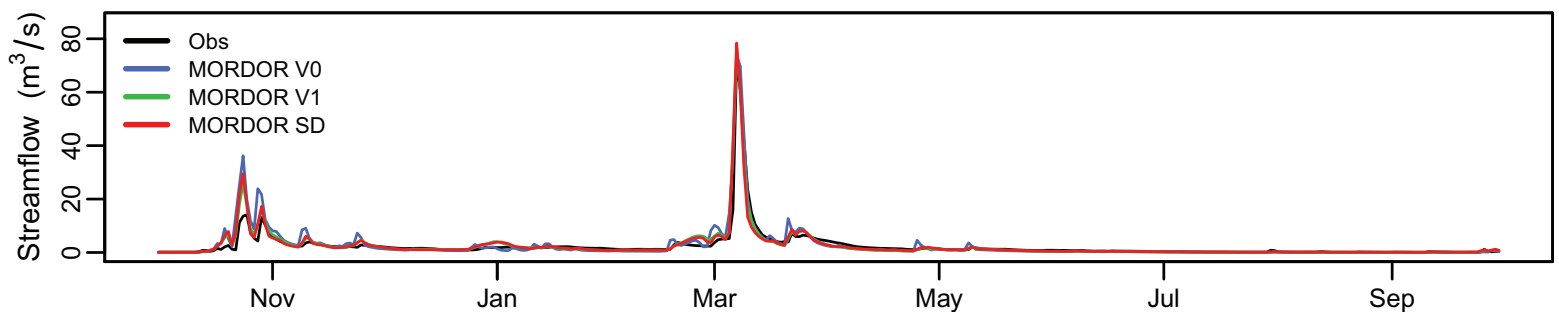

# Mimente@Florac

Year 1992

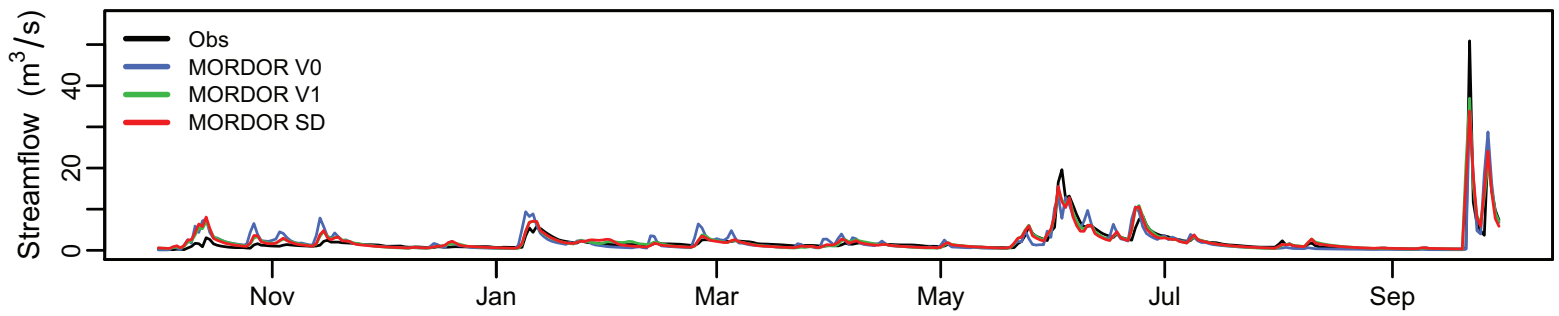

Year 1993

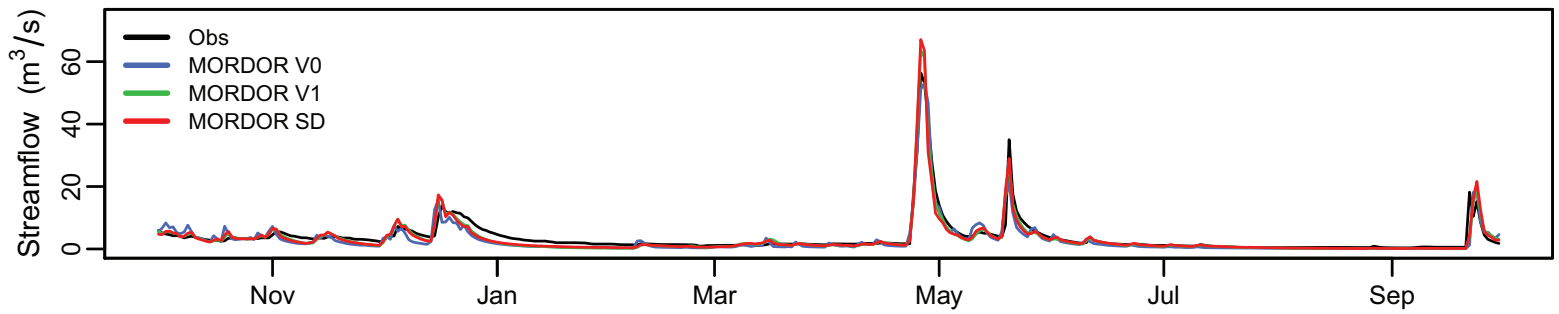

Year 1994

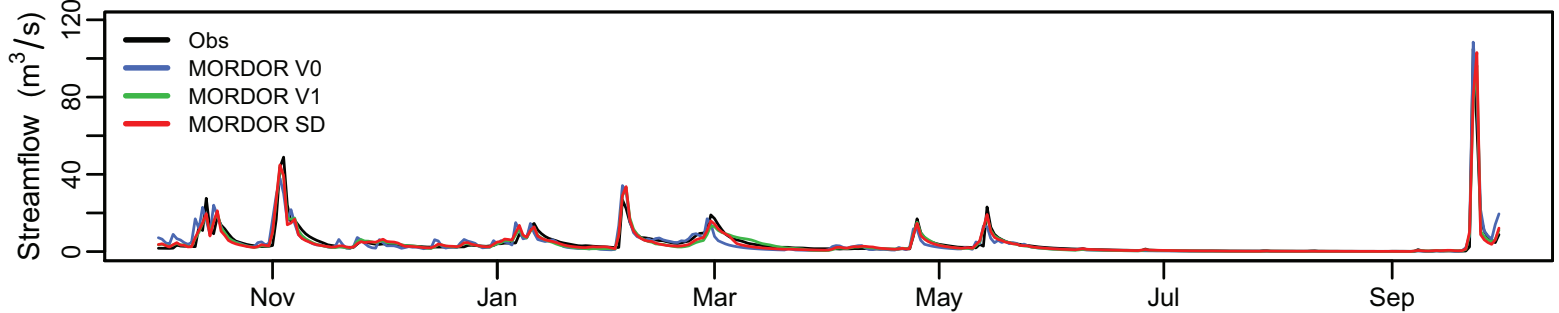

Year 1995

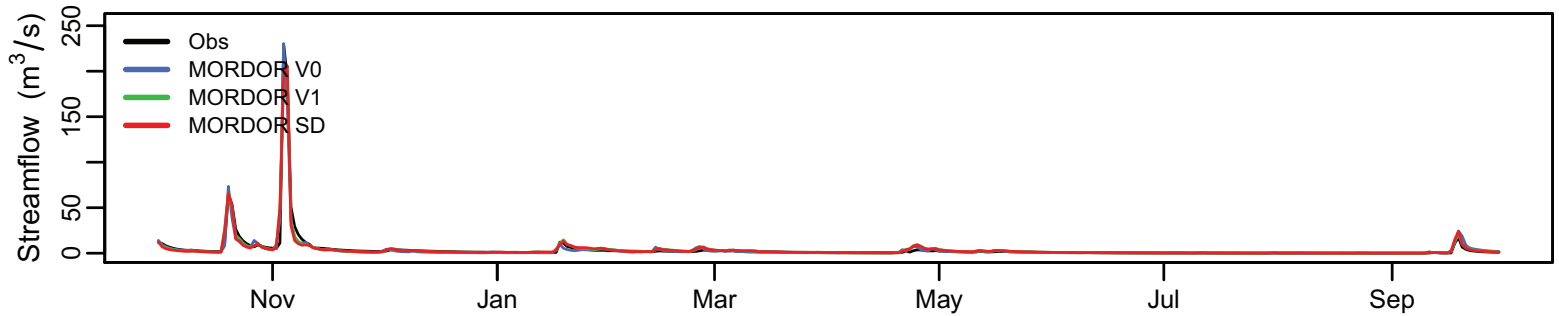

Year 1996

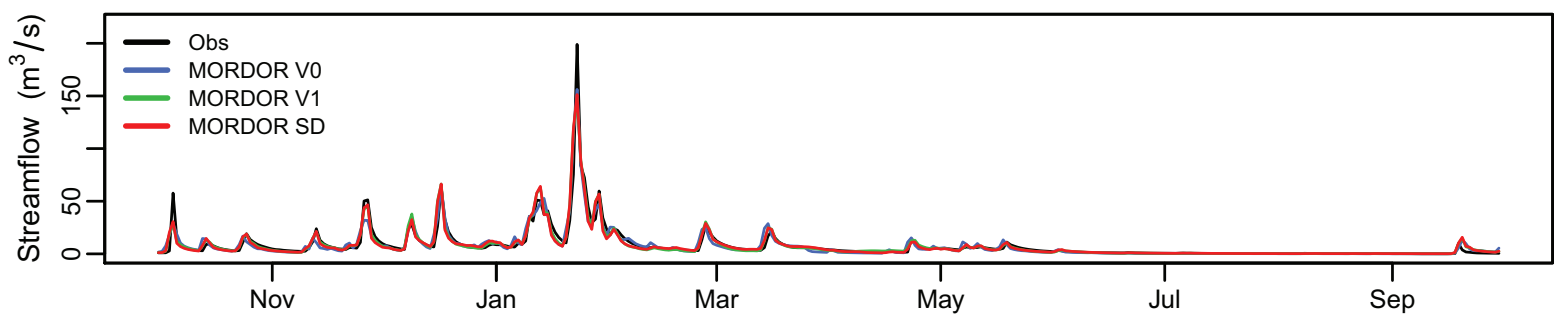

Year 1997

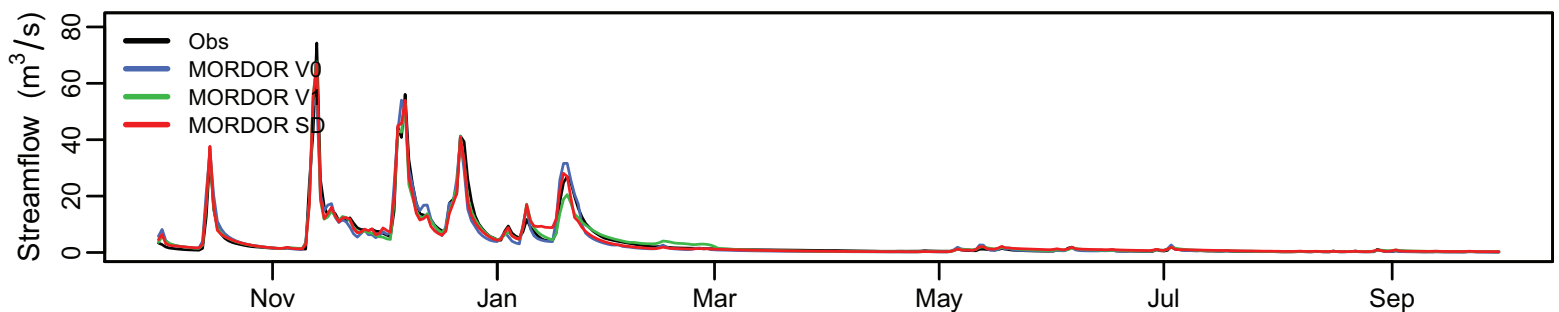

# Mimente@Florac

Year 1998

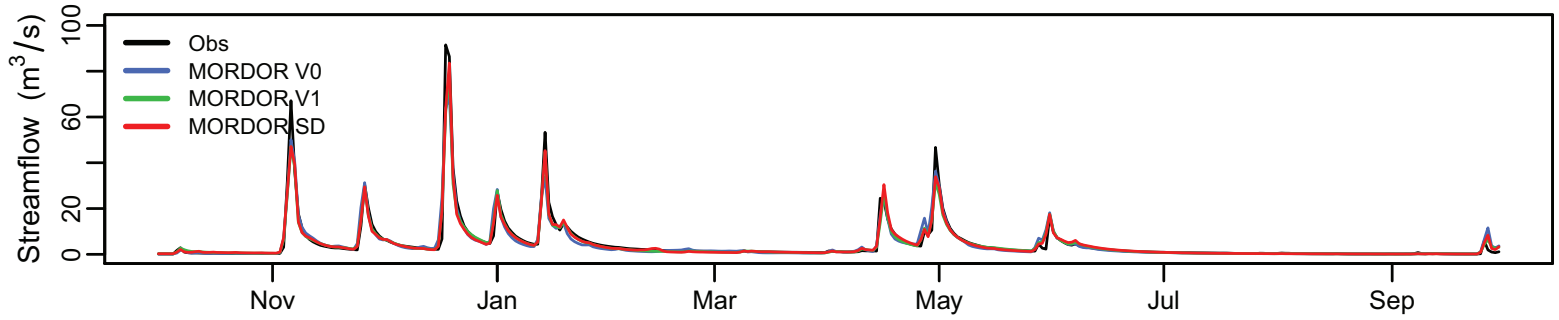

Year 1999

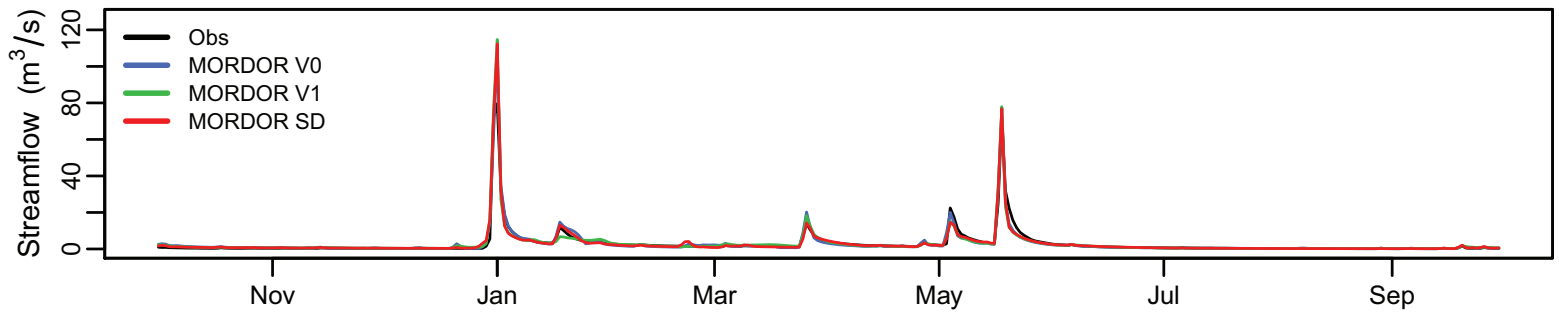

Year 2000

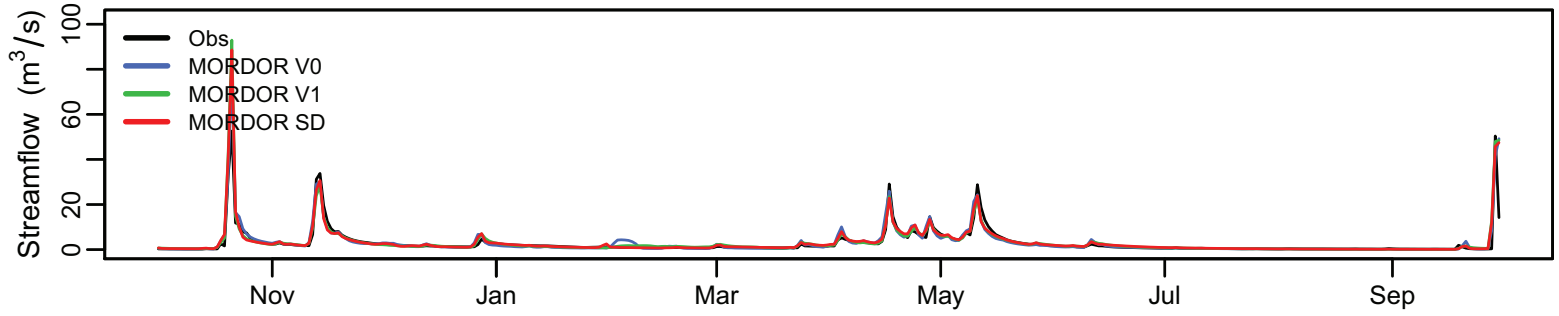

Year 2001

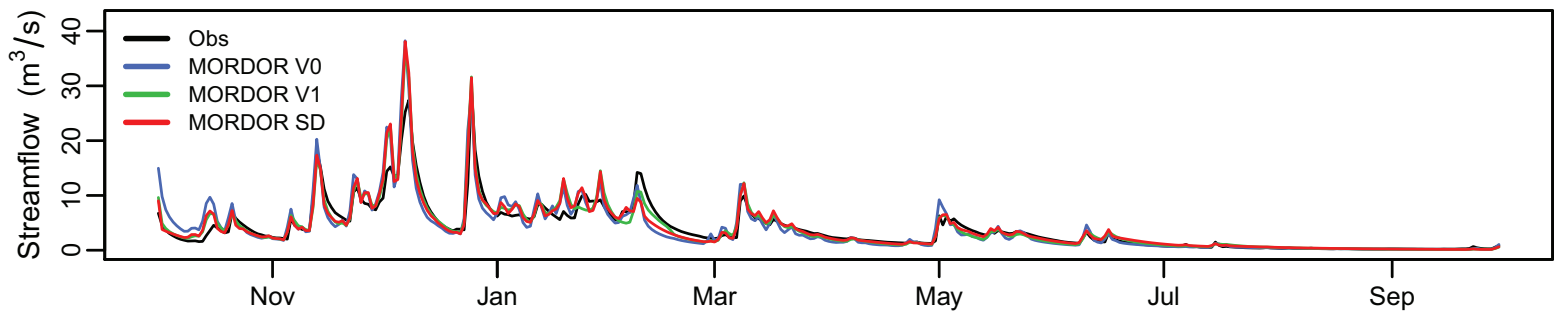

Year 2002

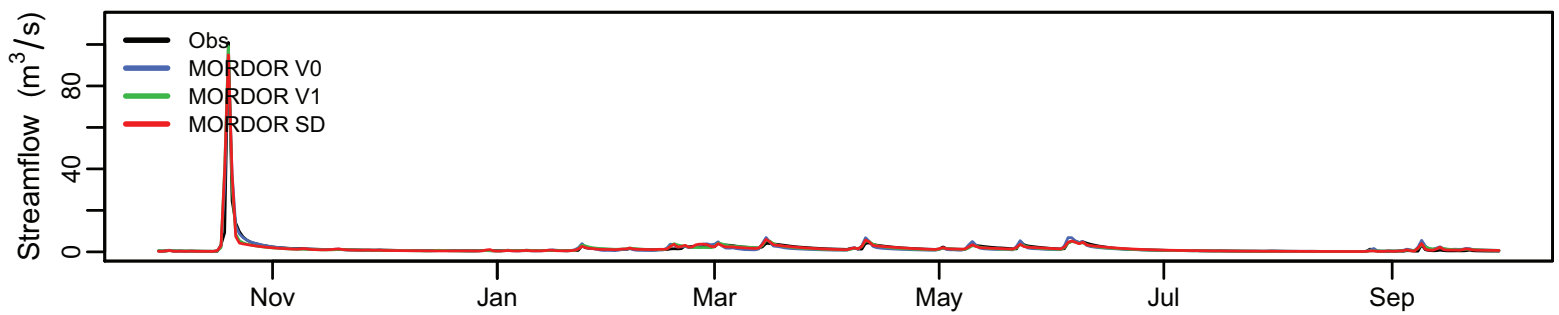

Year 2003

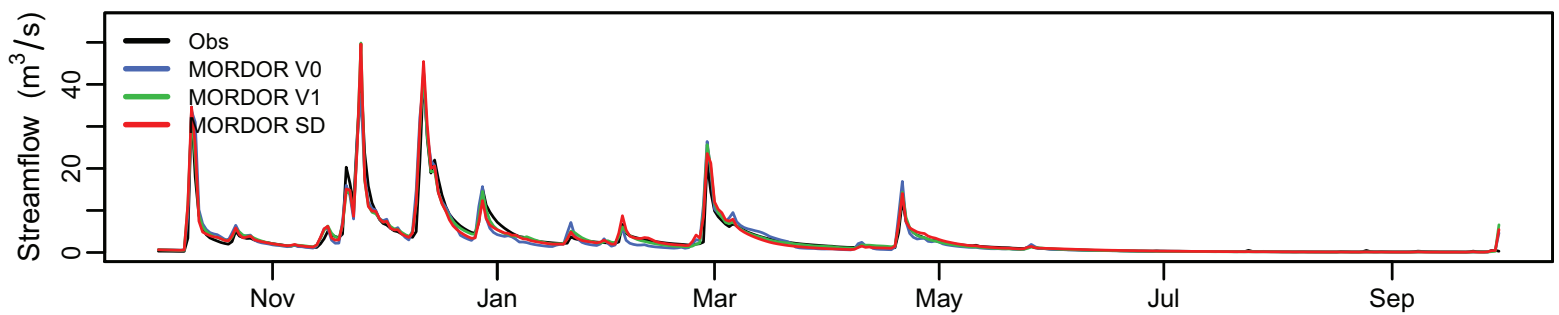

# Mimente@Florac

Year 2004

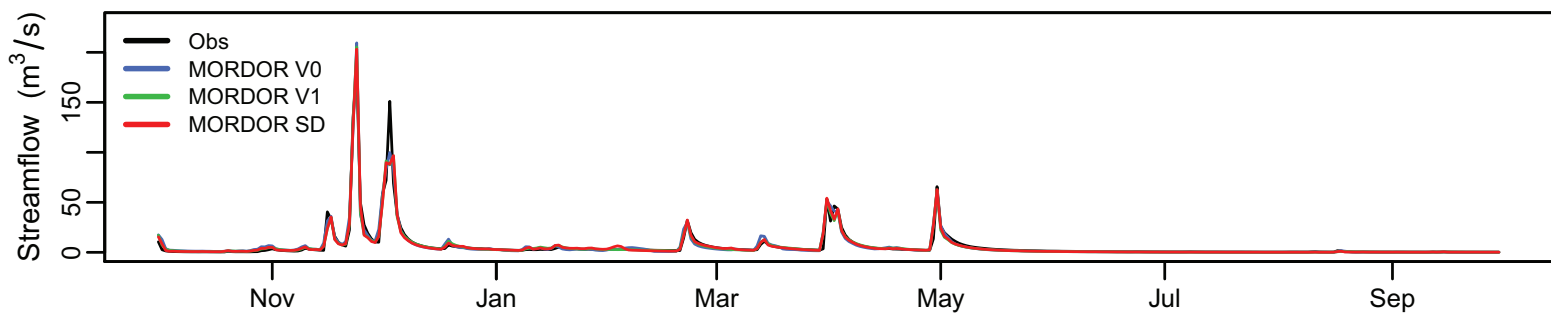

Year 2005

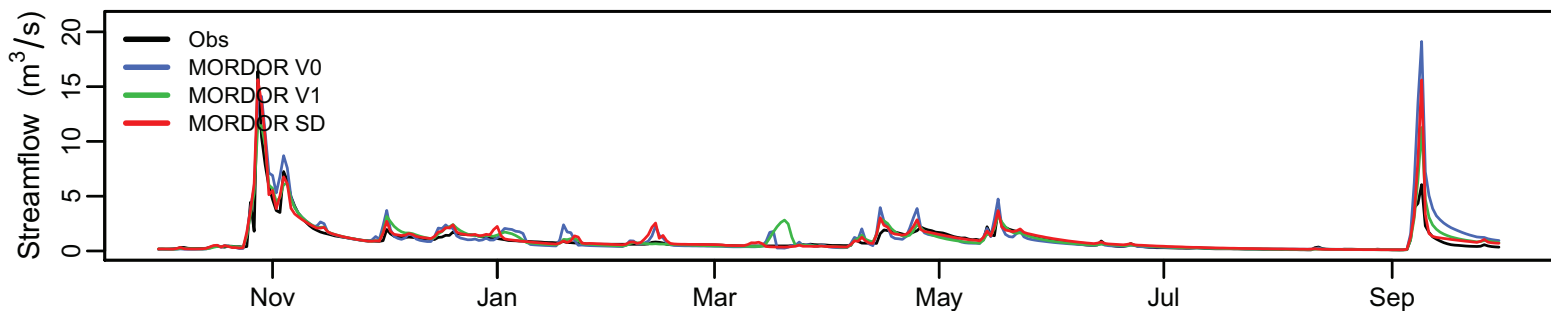

Year 2006

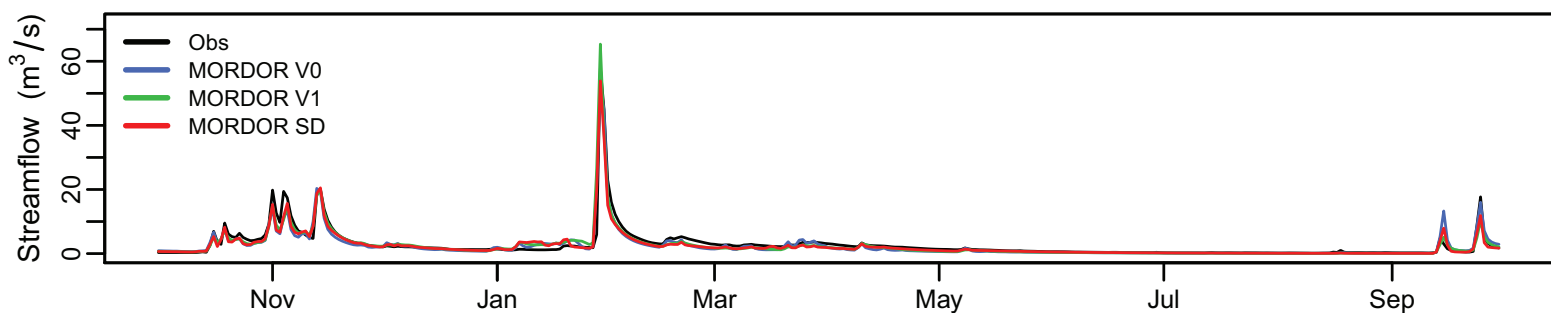



# Montane@Eyrein

Year 1959

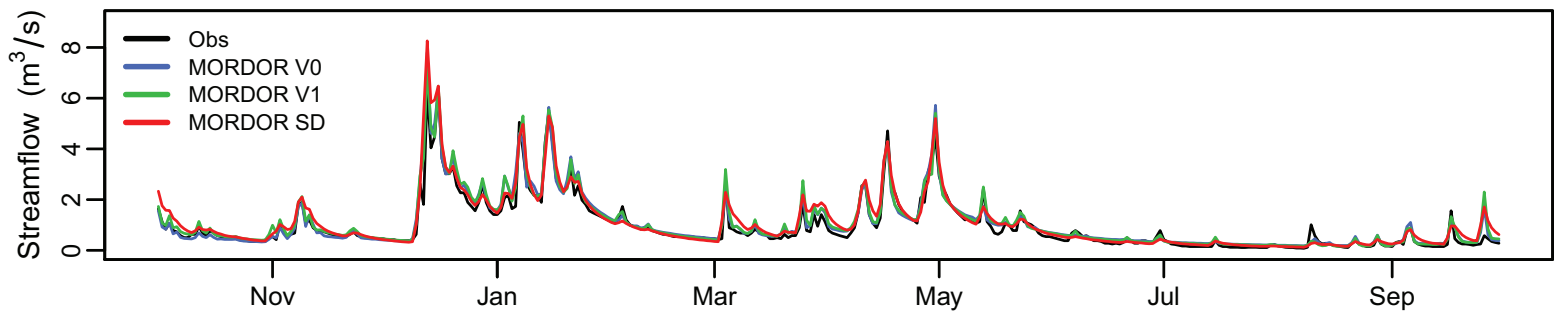

Year 1960

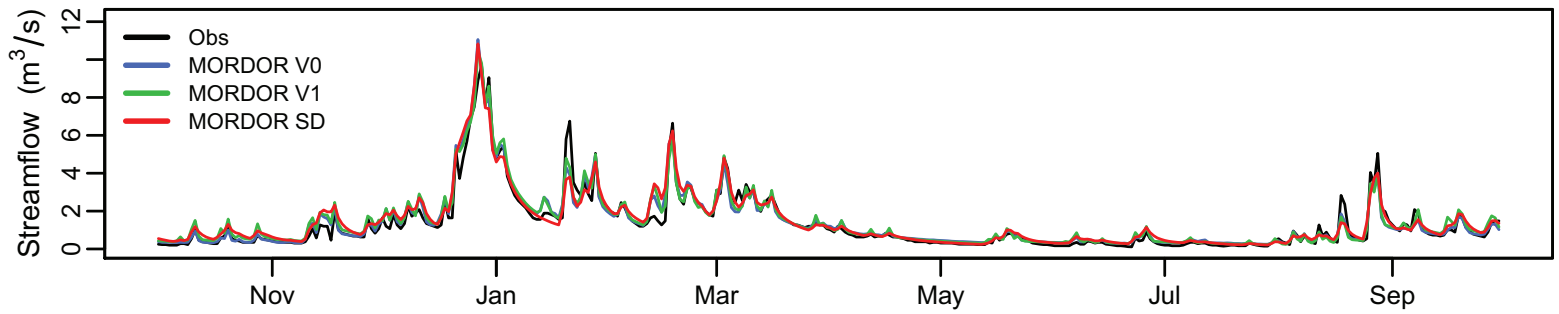

Year 1961

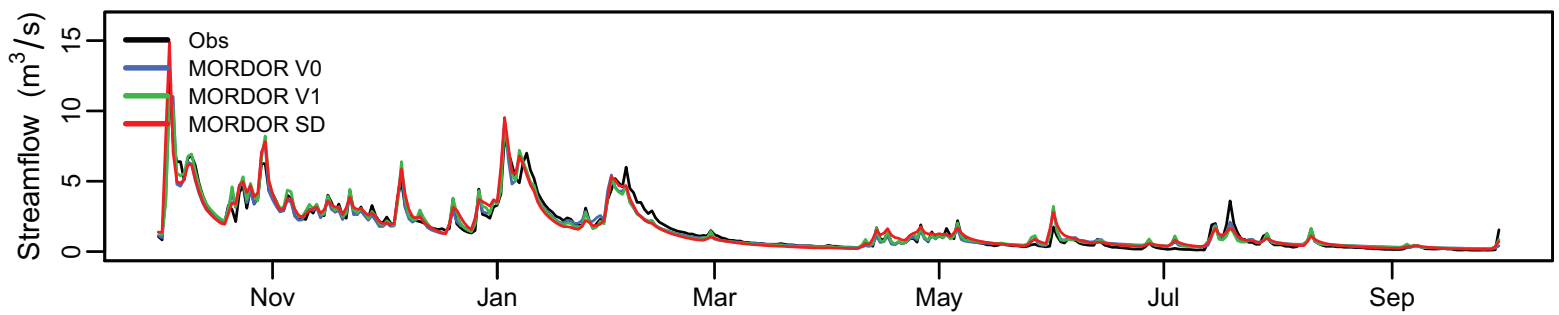

Year 1962

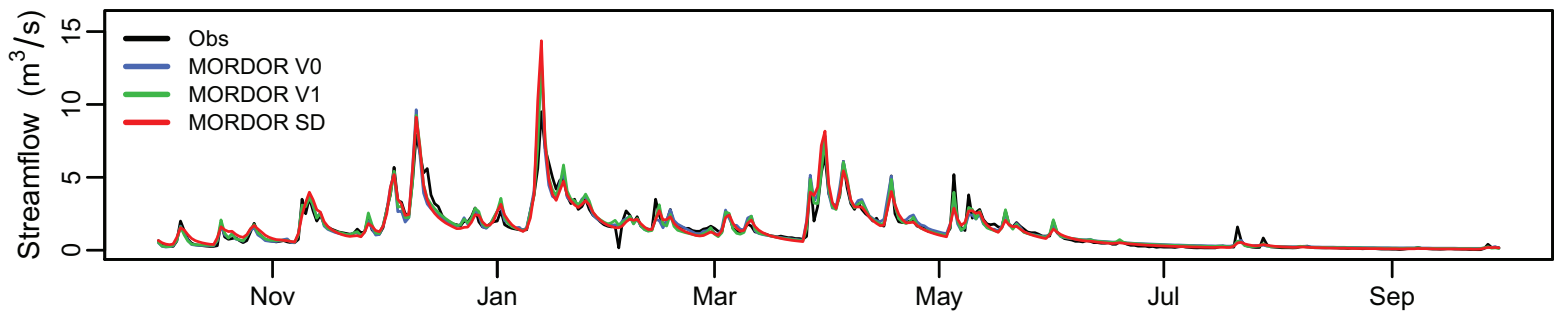

Year 1963

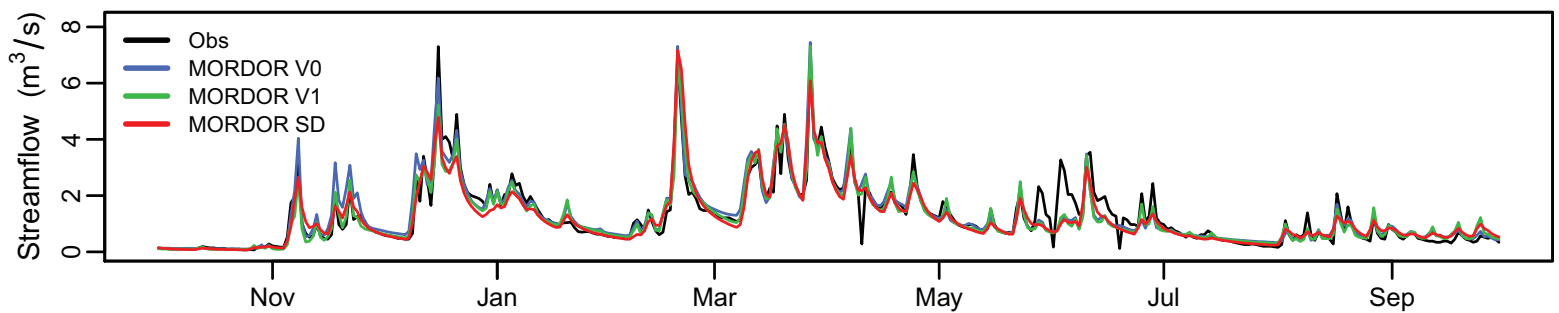

Year 1964

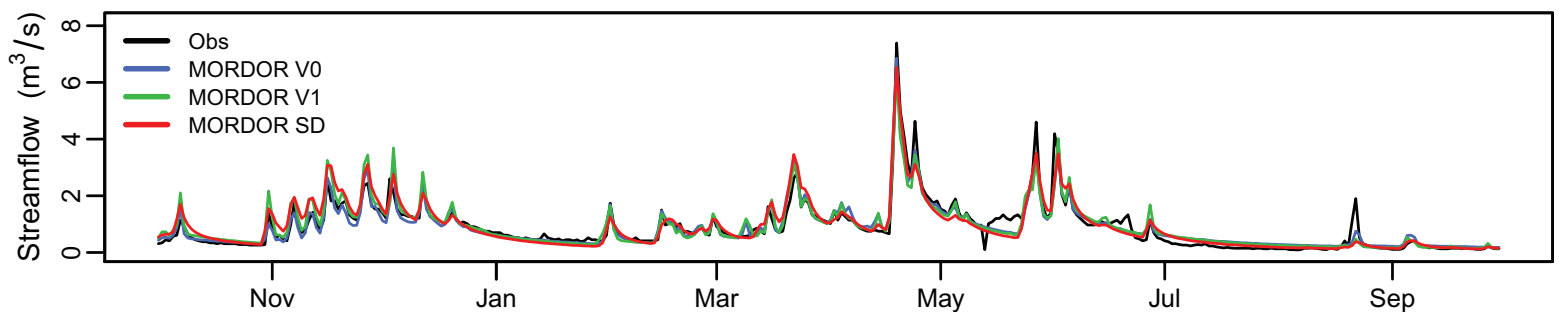

# Montane@Eyrein

Year 1965

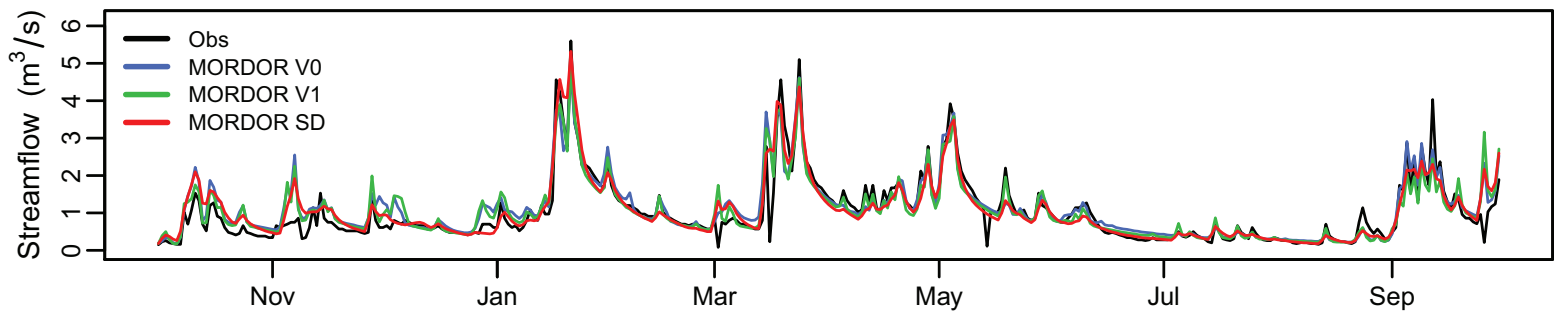

Year 1966

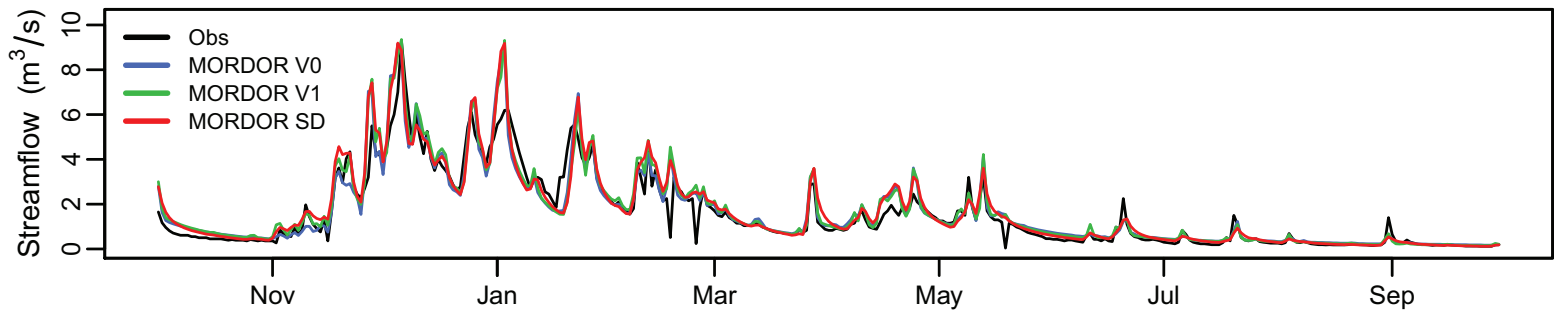

Year 1967

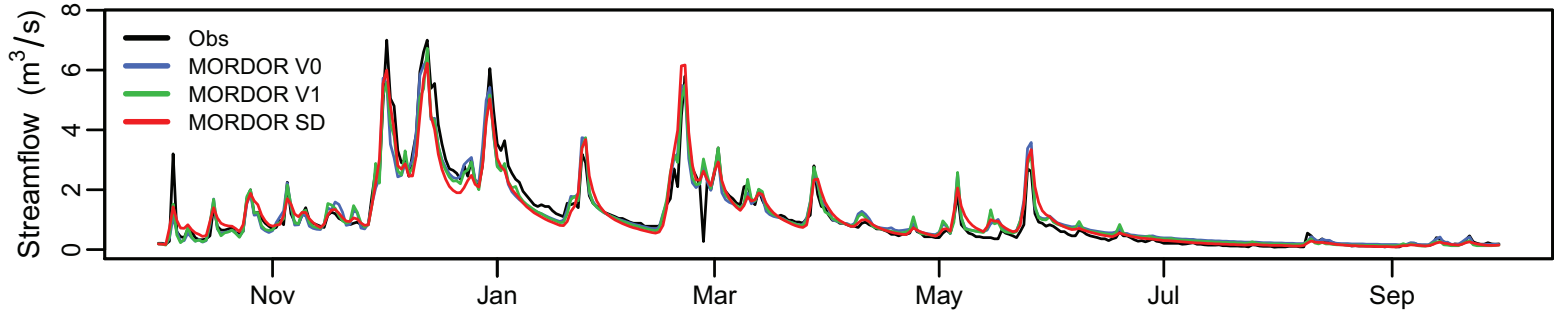

Year 1968

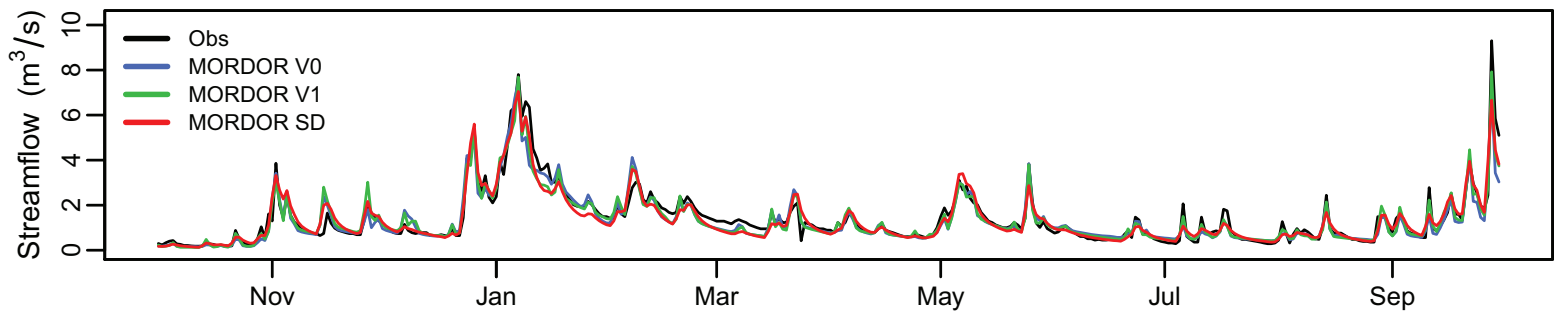

Year 1969

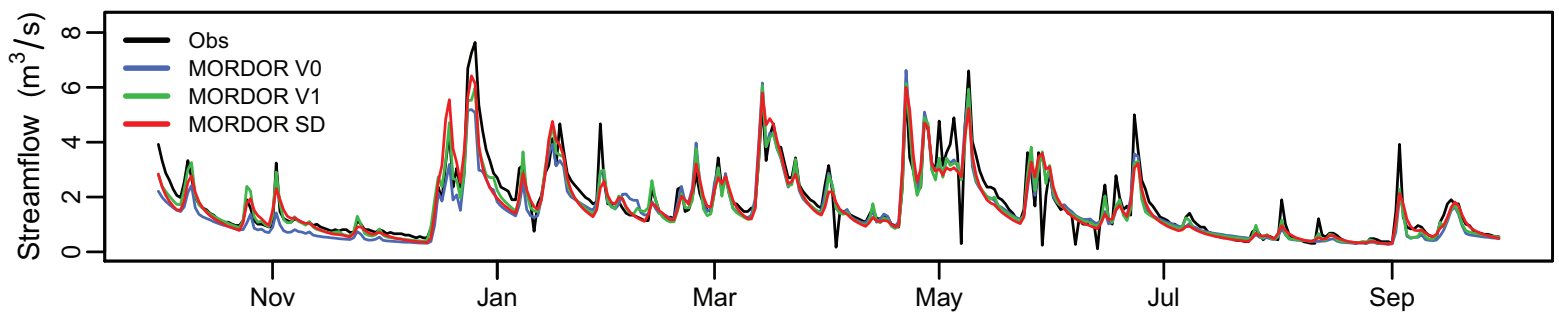

Year 1970

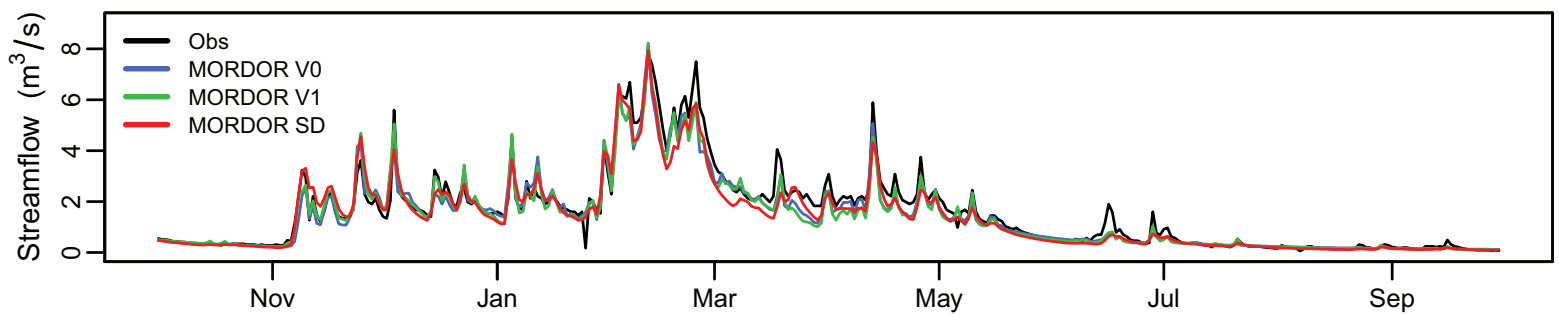

# Montane@Eyrein

Year 1971

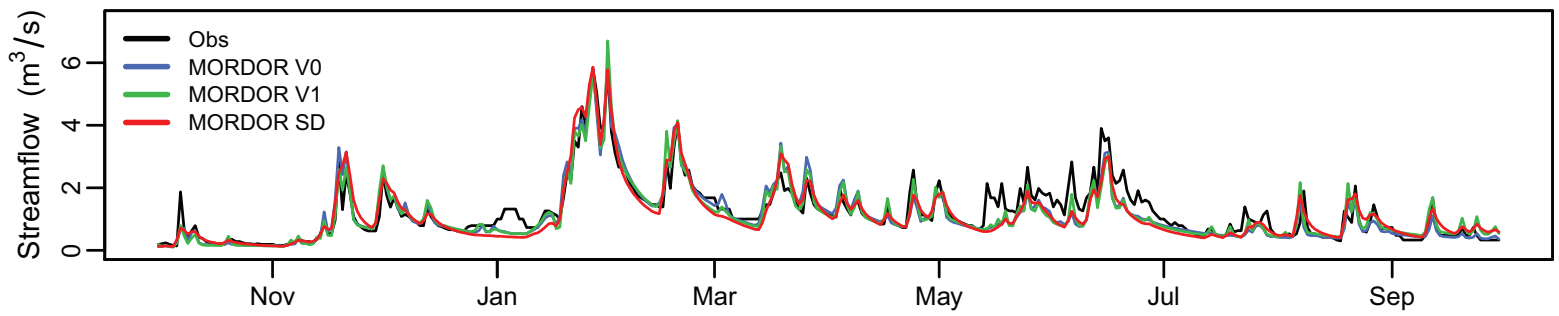

Year 1972

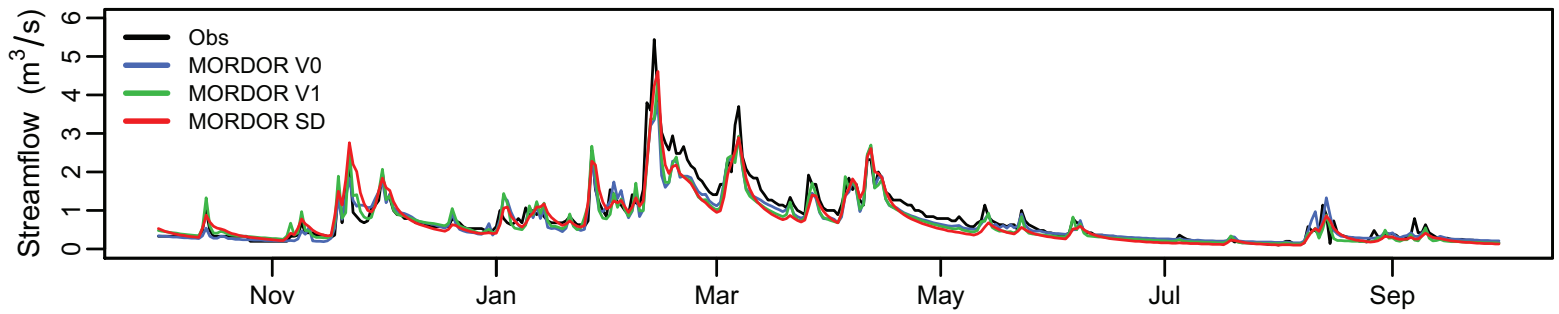

Year 1973

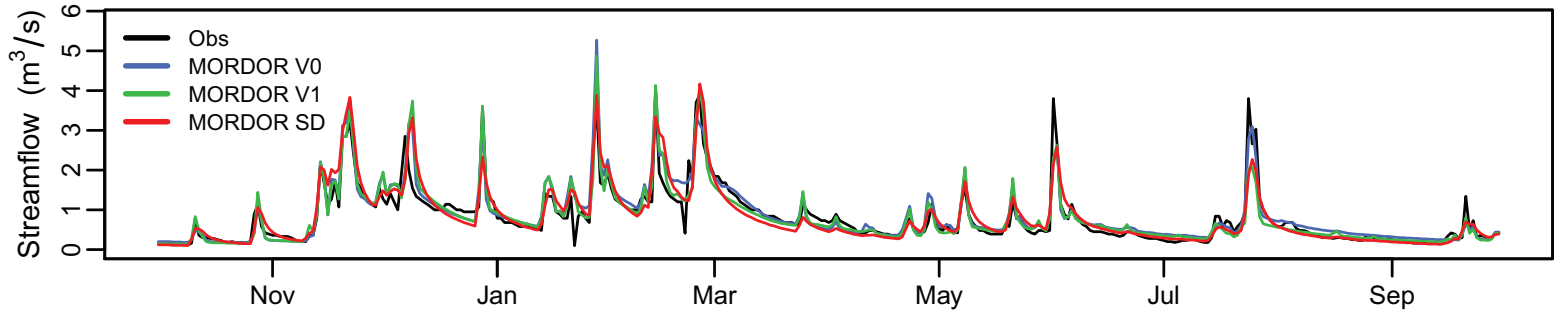

Year 1974

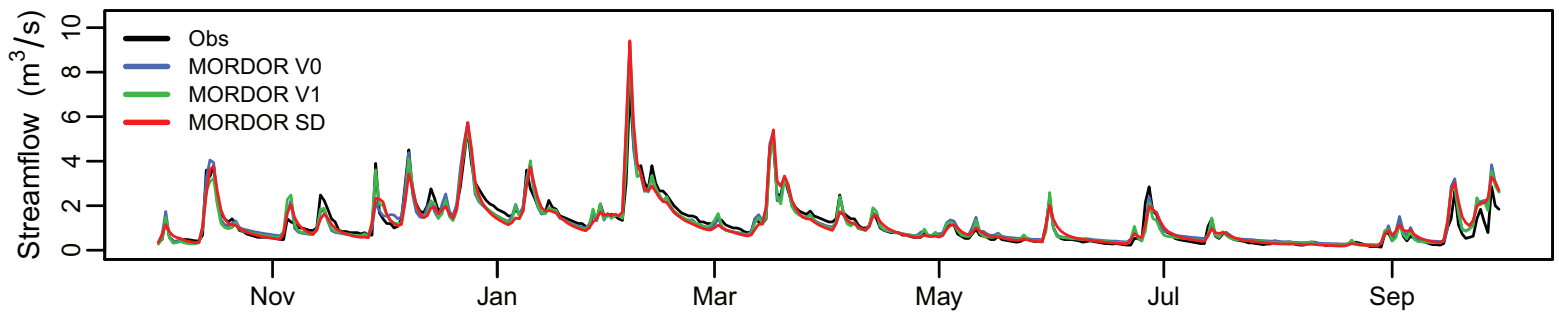

Year 1975

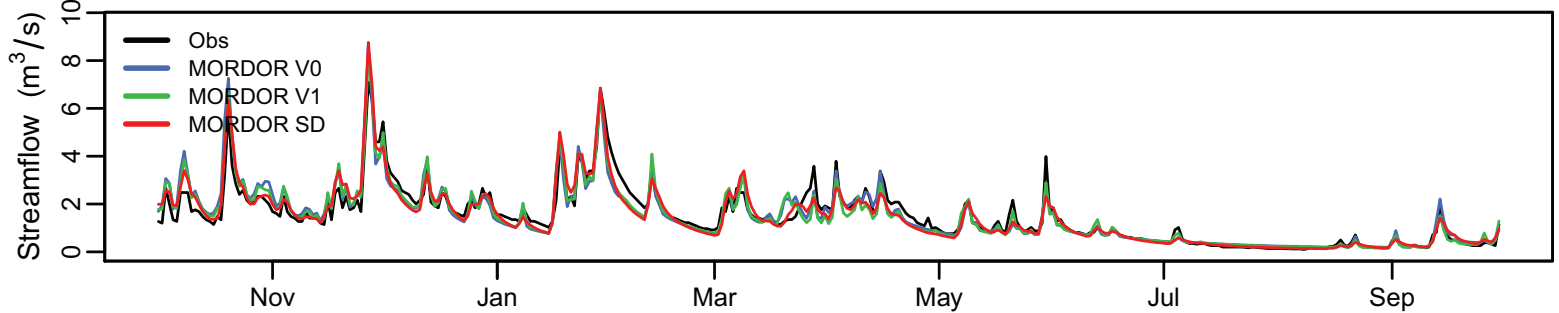

Year 1976

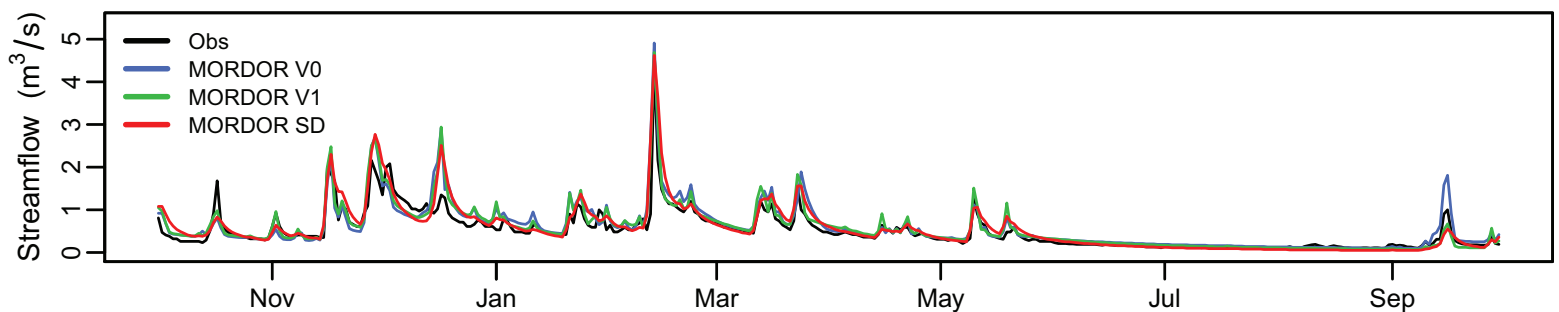

# Montane@Eyrein

Year 1977

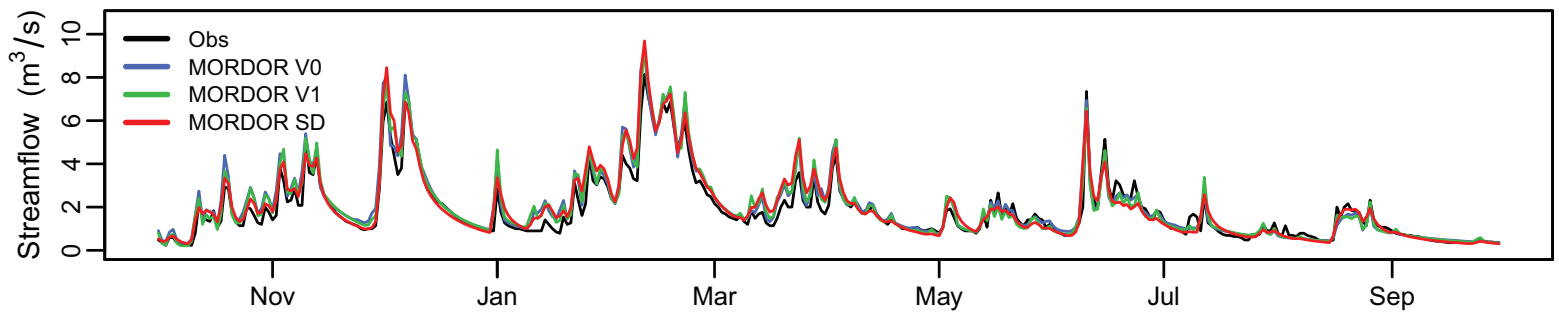

Year 1978

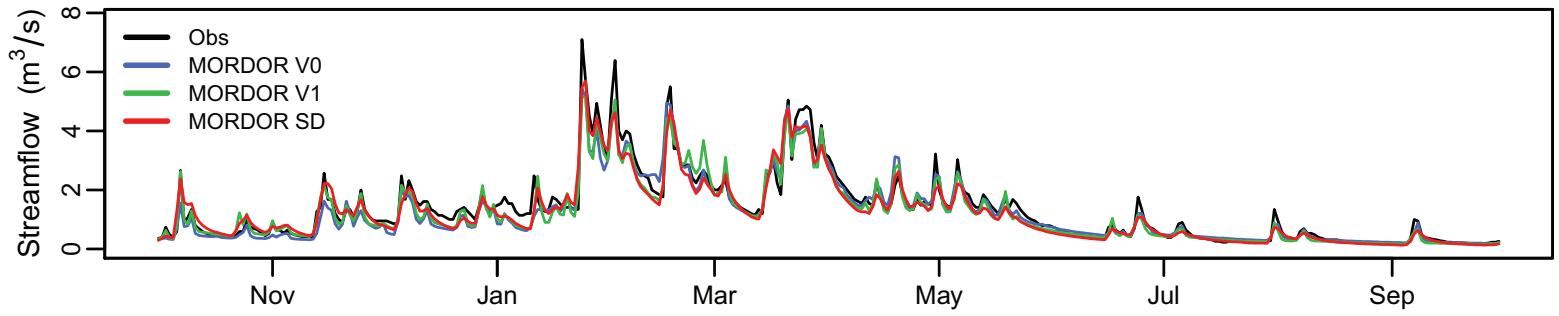

Year 1979

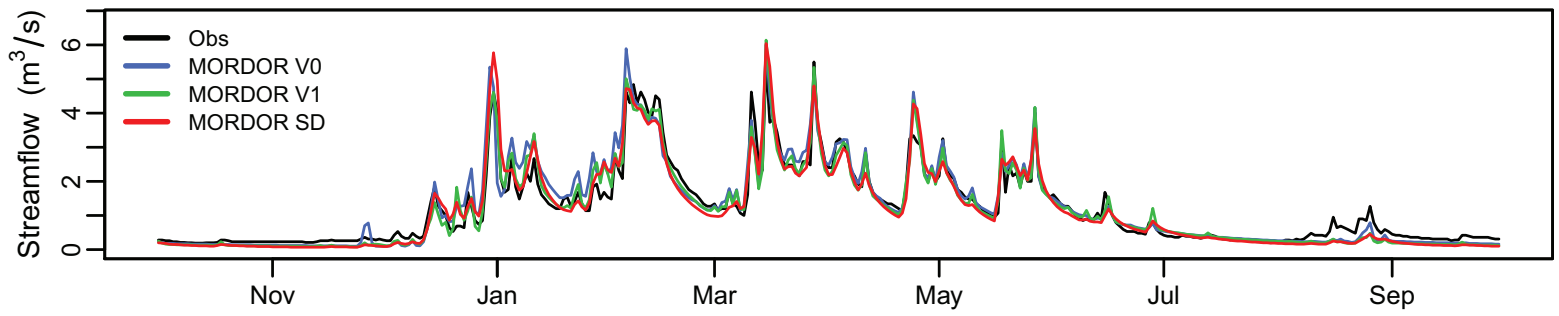

Year 1980

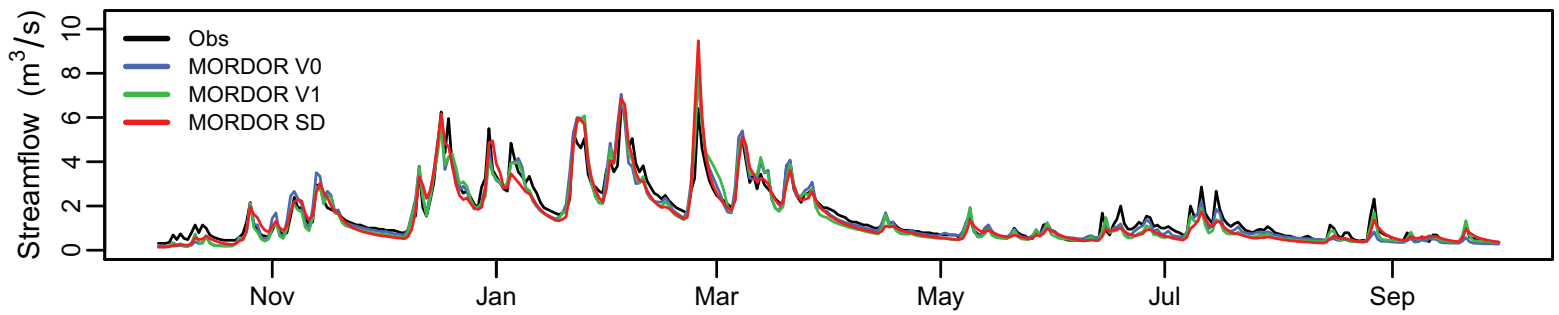

Year 1981

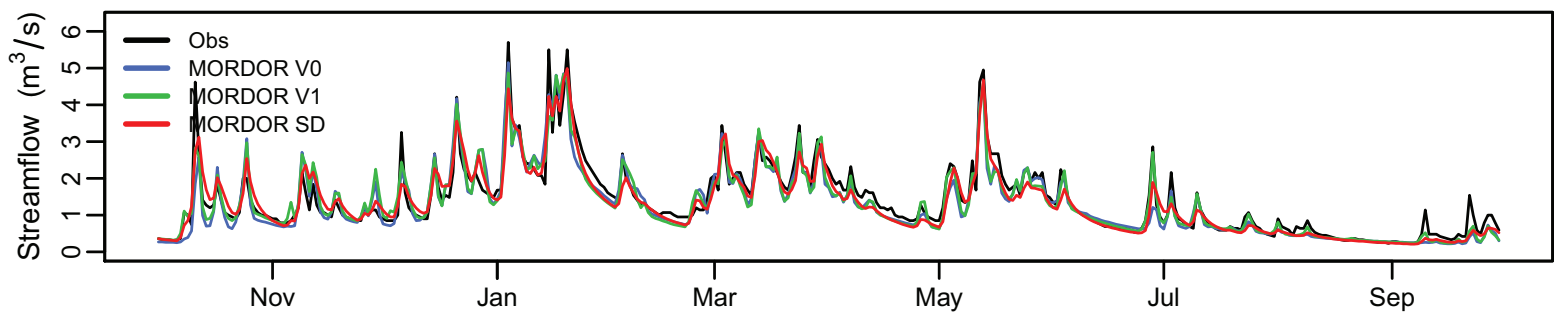

Year 1982

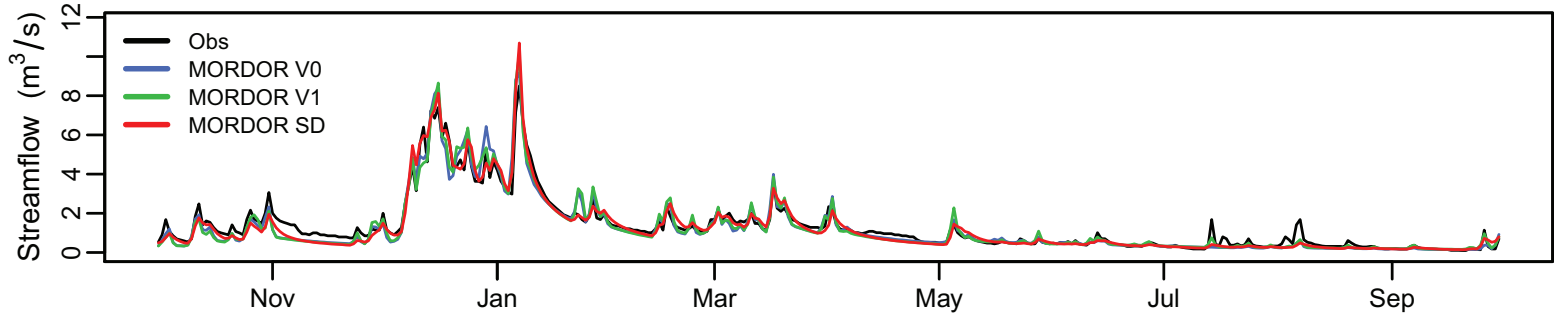

# Montane@Eyrein

Year 1983

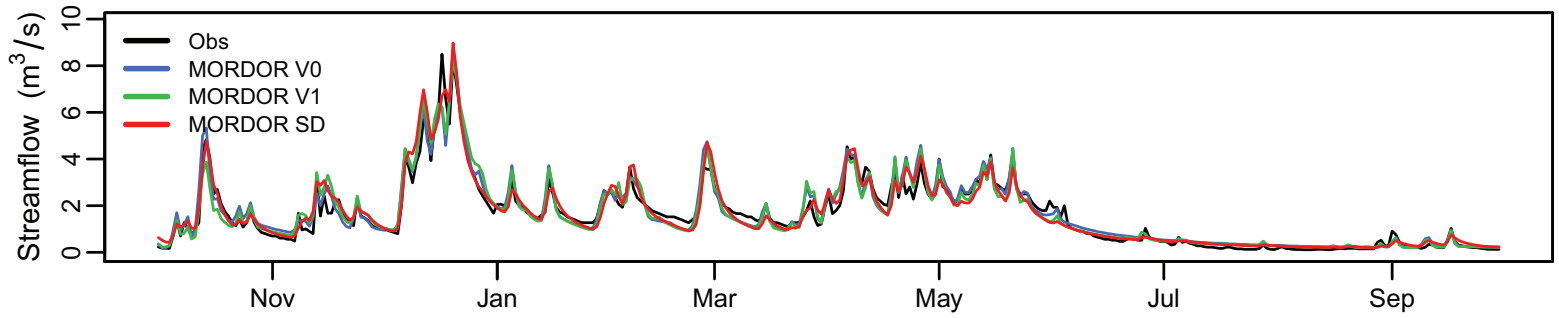

Year 1984

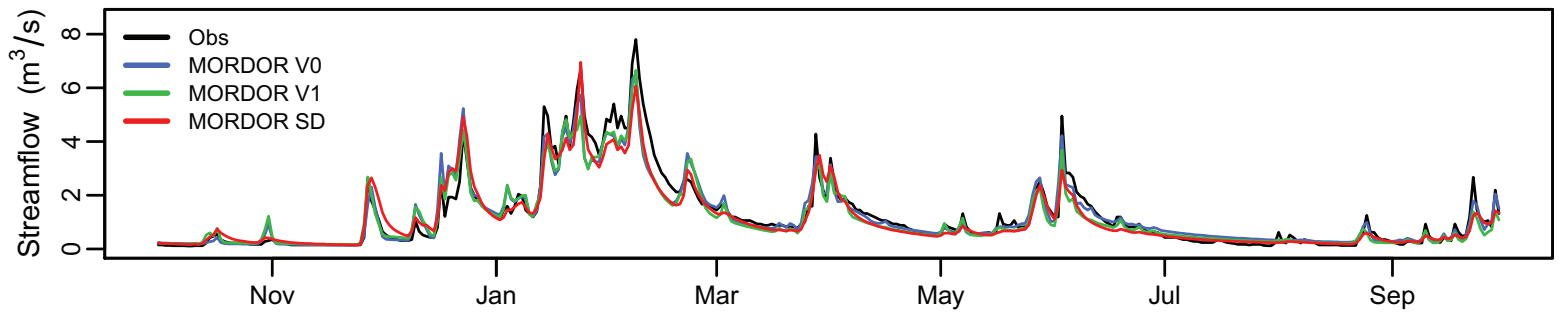

Year 1985

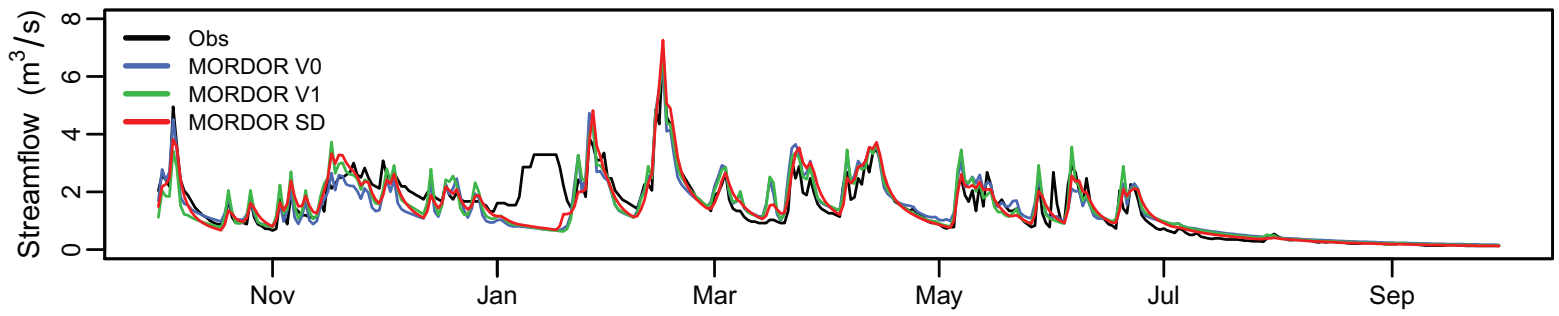

Year 1986

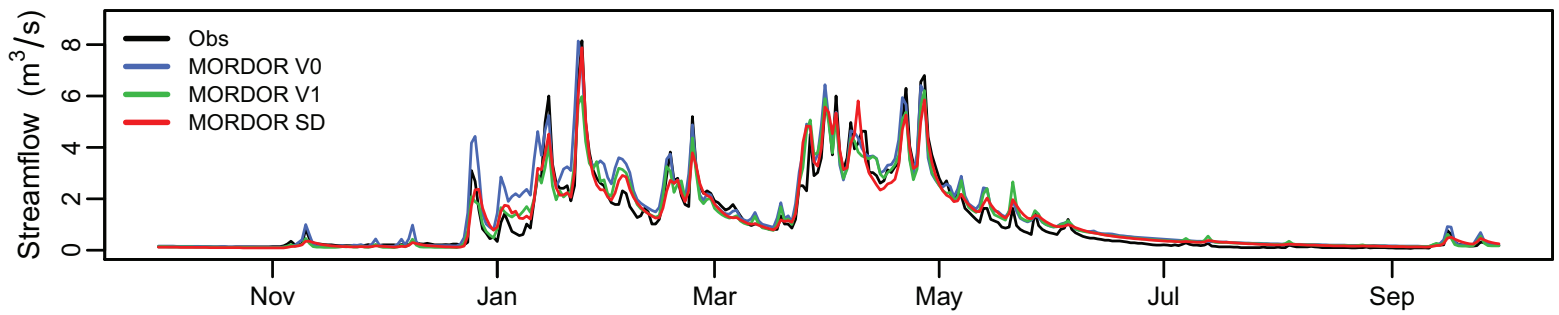

Year 1987

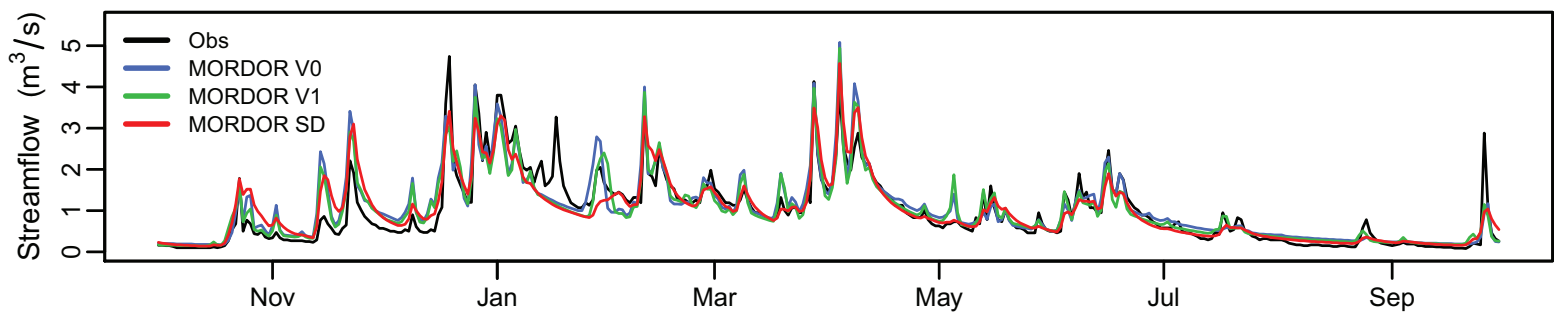

Year 1988

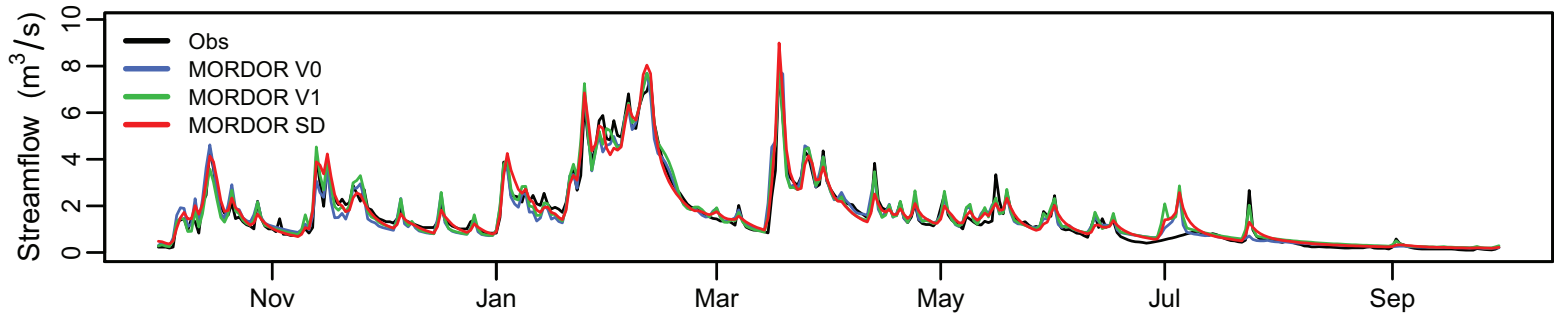

# Montane@Eyrein

Year 1989

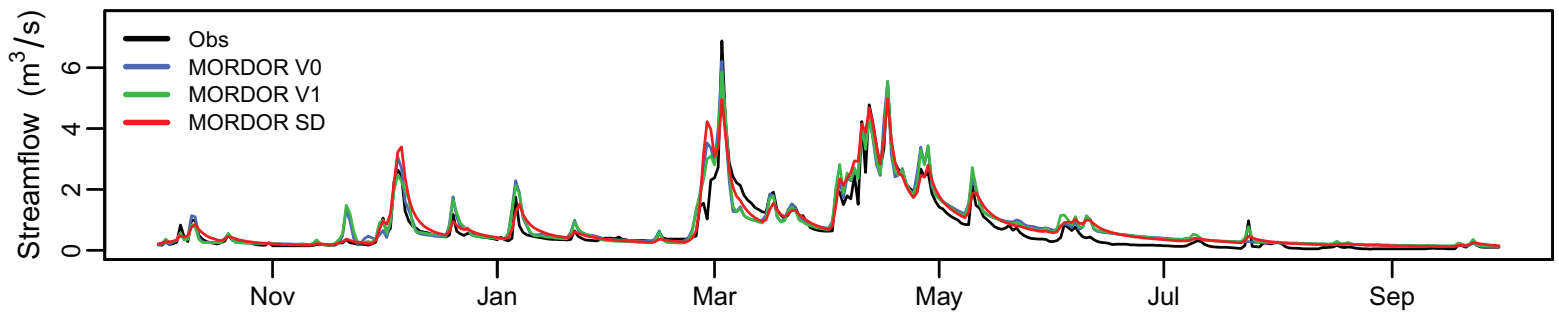

Year 1990

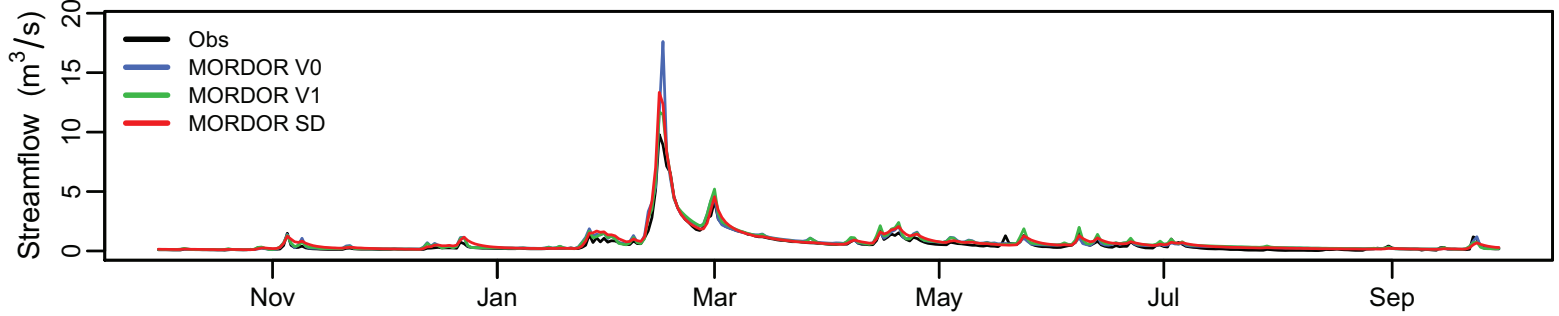

Year 1991

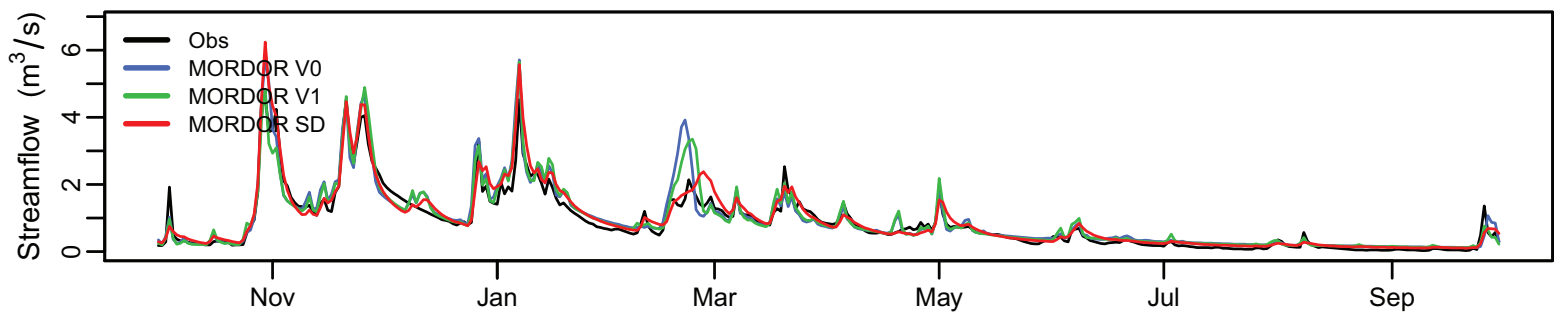

Year 1992

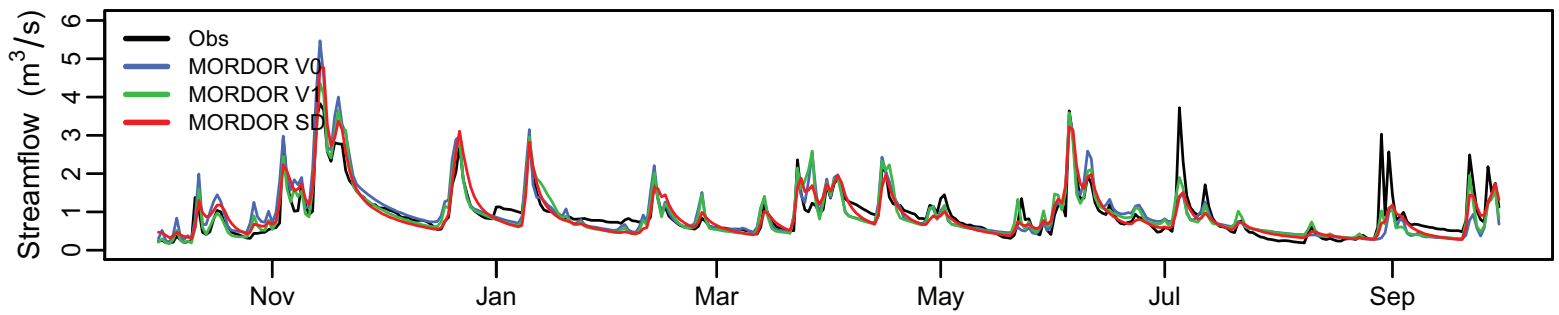

Year 1993

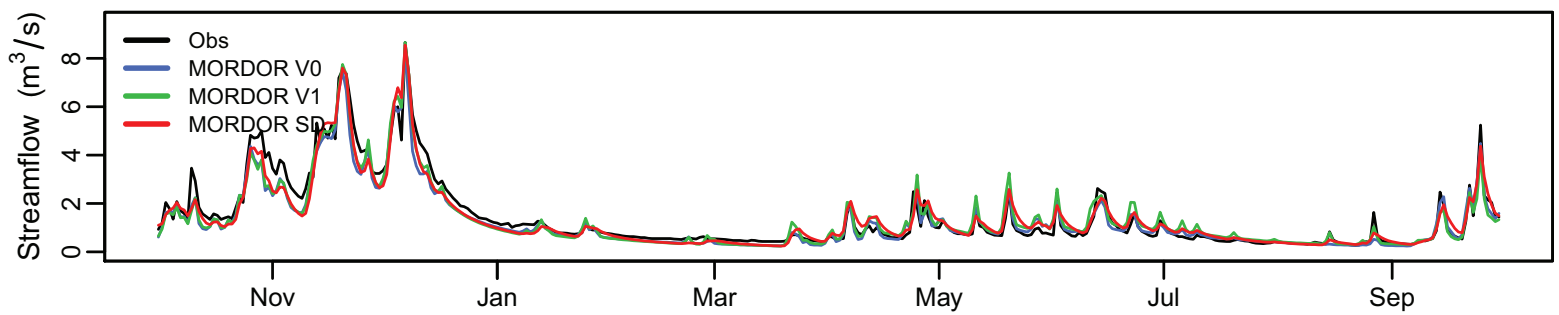

Year 1994

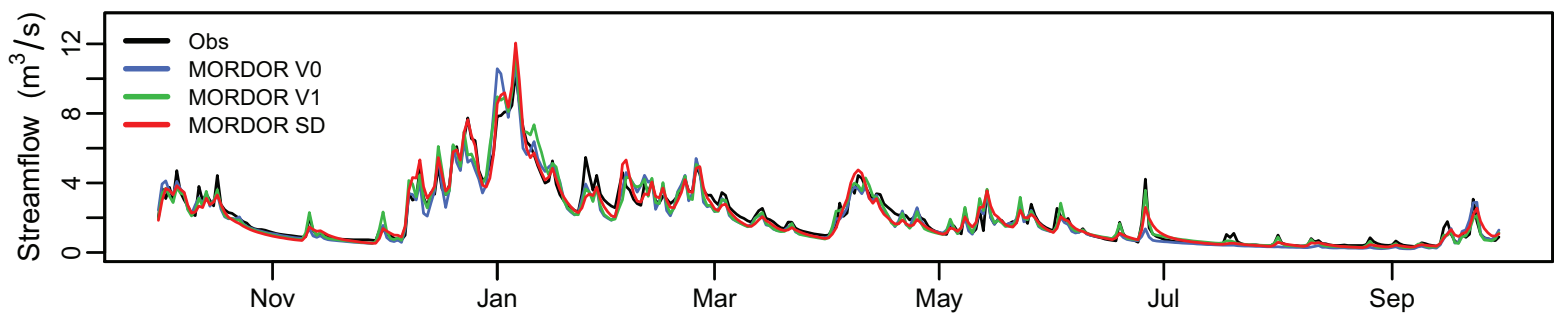

# Montane@Eyrein

Year 1995

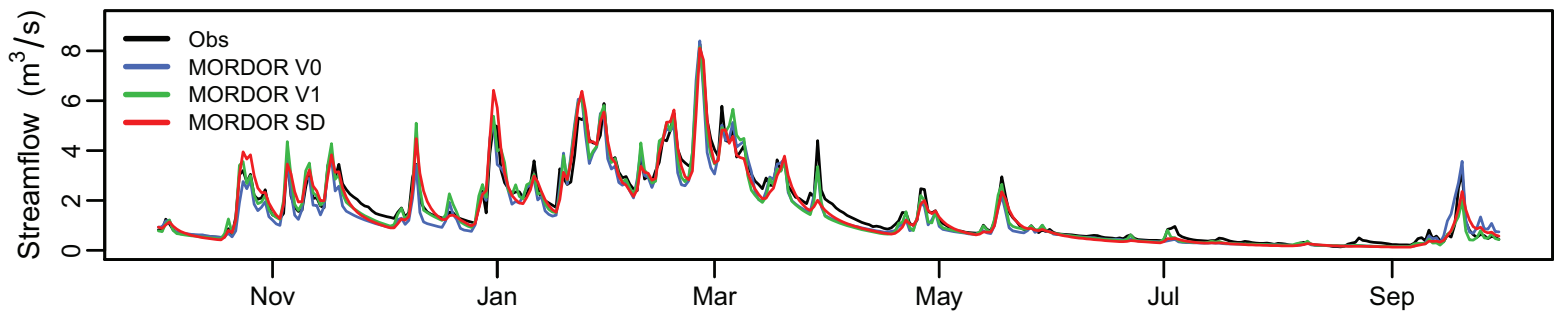

Year 1996

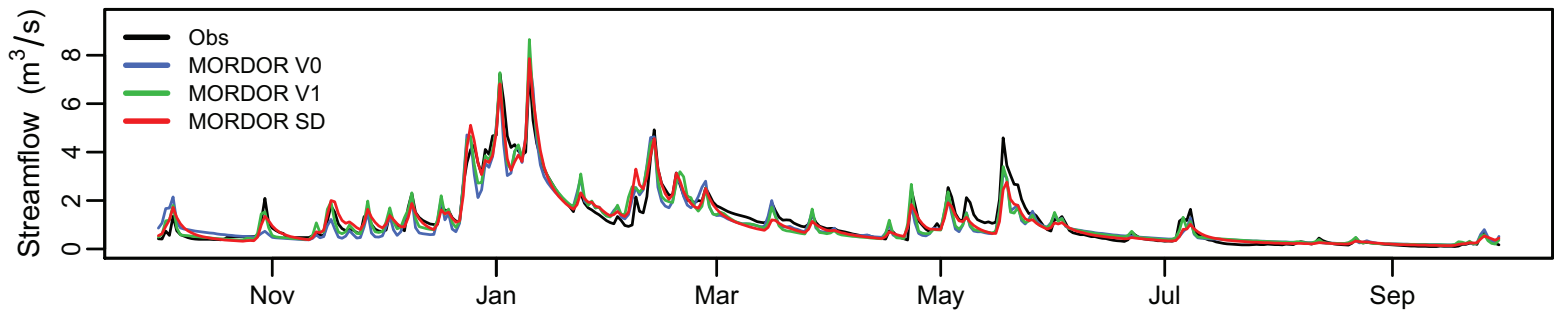

Year 1997

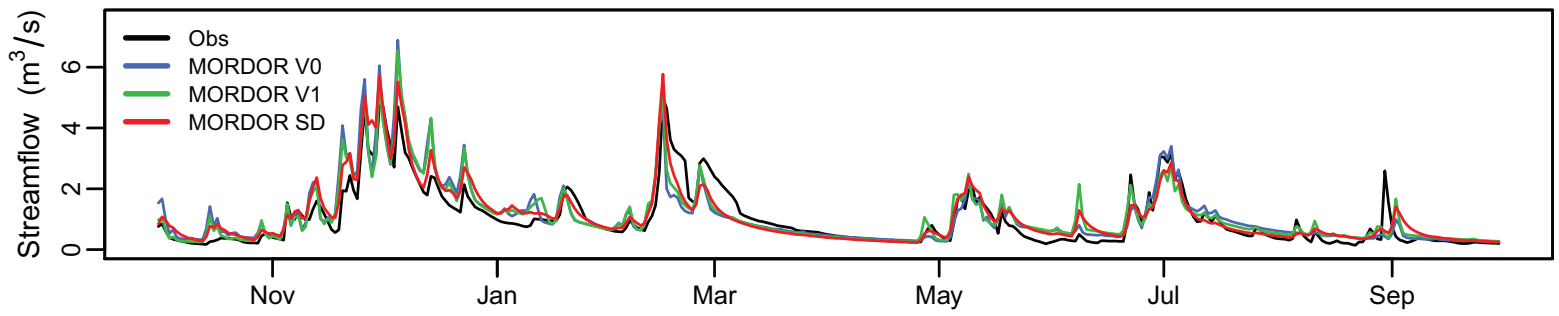

Year 1998

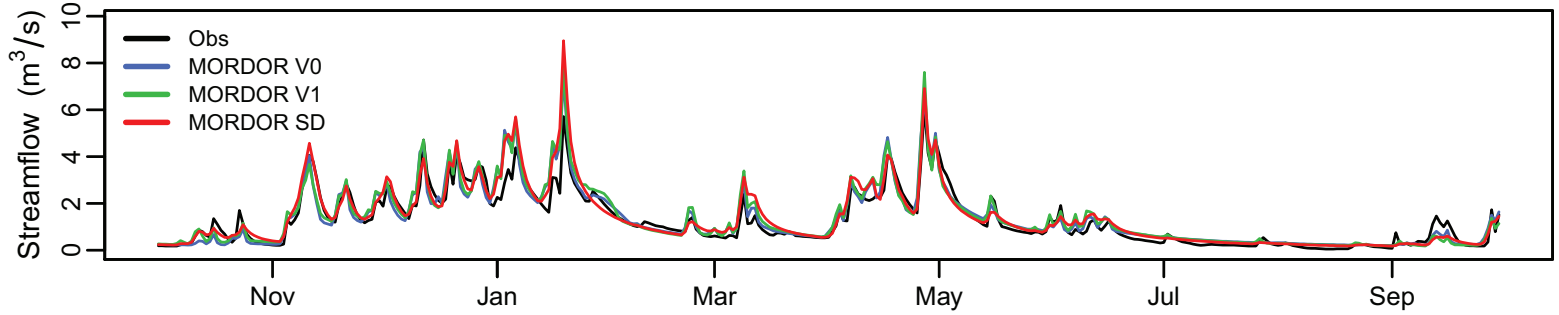

Year 1999

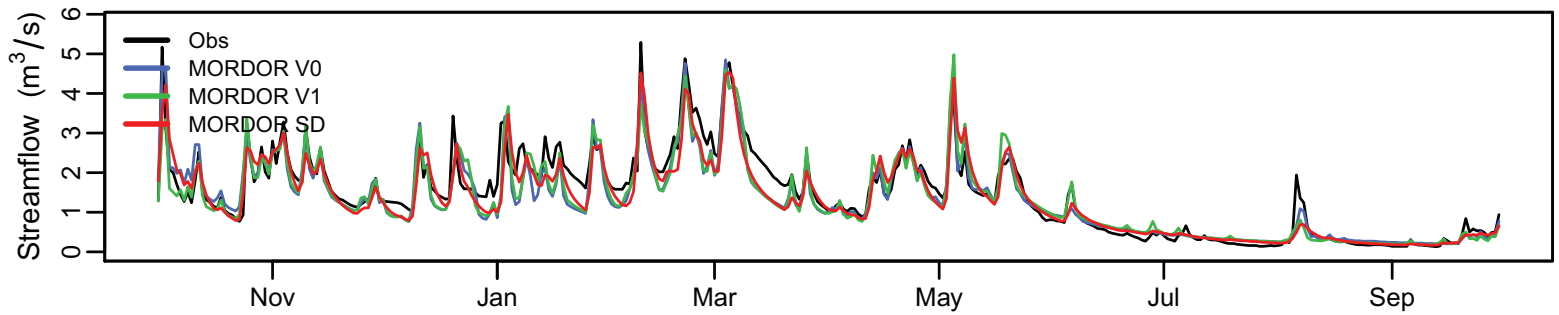

# Oriege@Campauleil

Year 1961

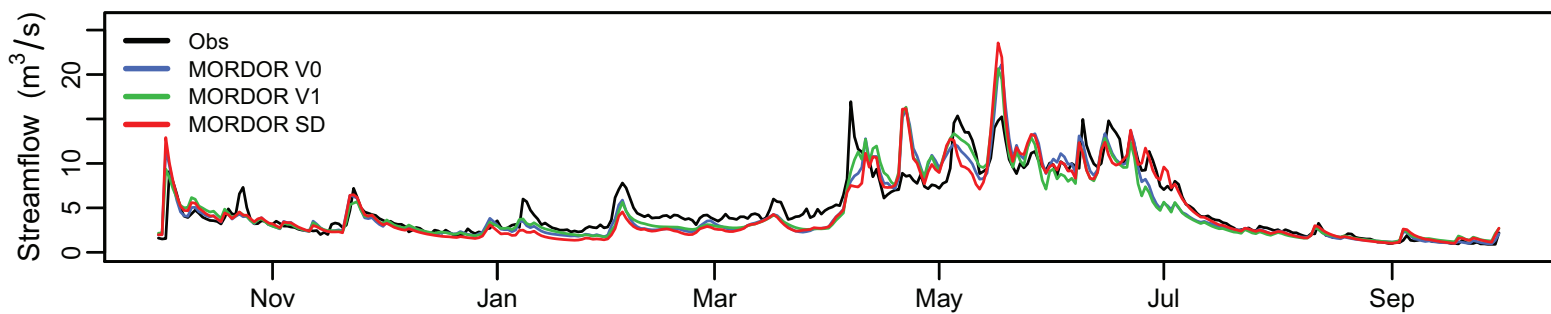

Year 1962

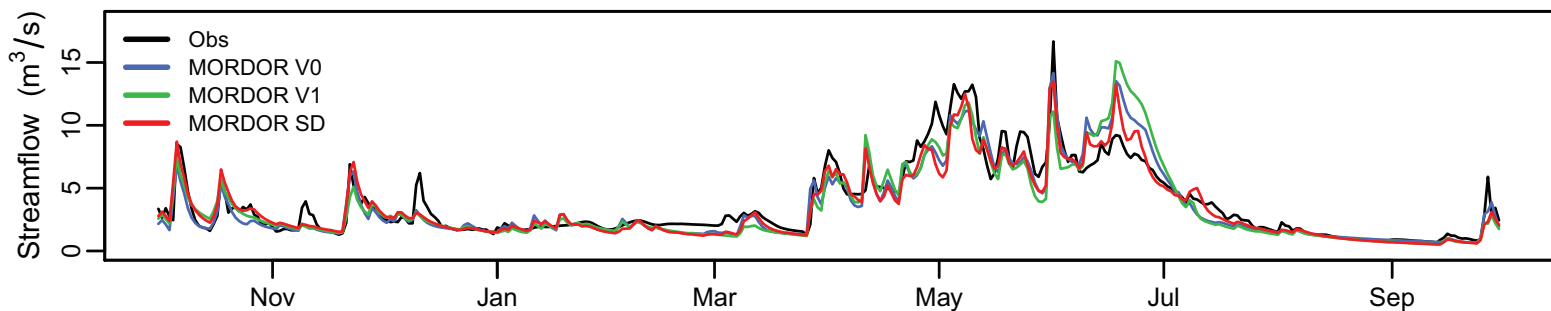

Year 1963

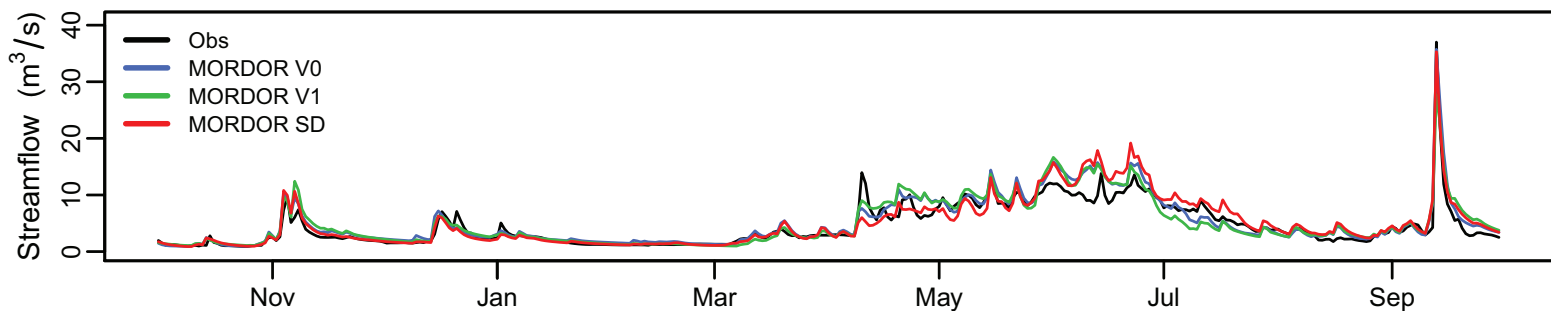

Year 1964

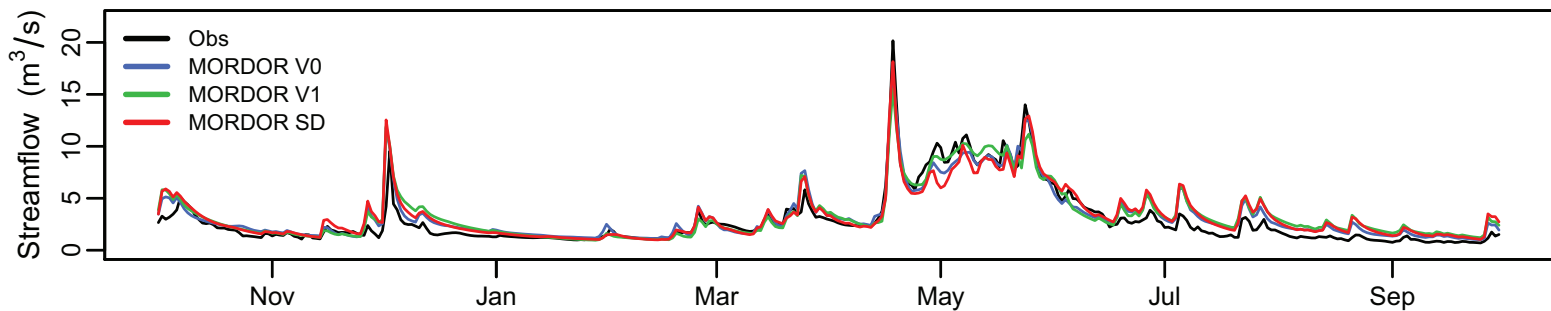

Year 1965

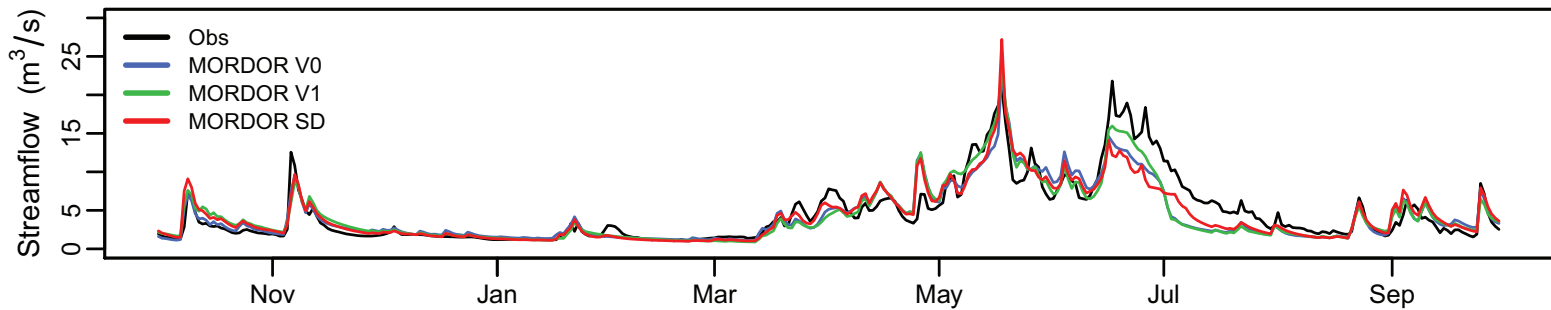

Year 1966

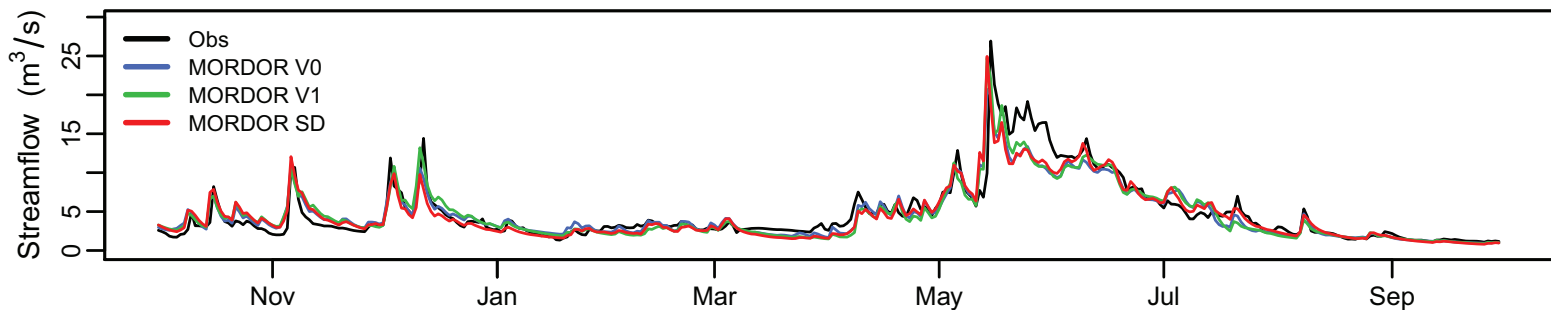



# Oriege@Campauleil

Year 1967

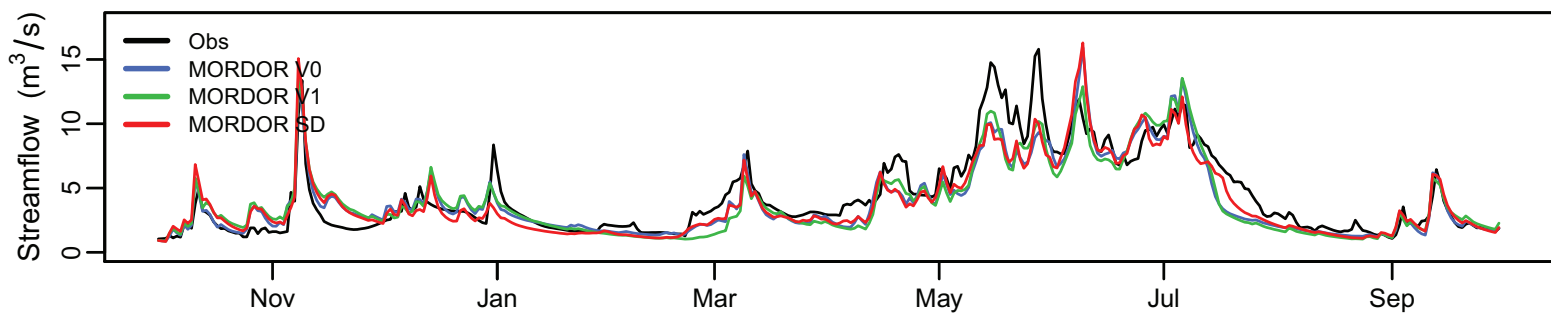

Year 1968

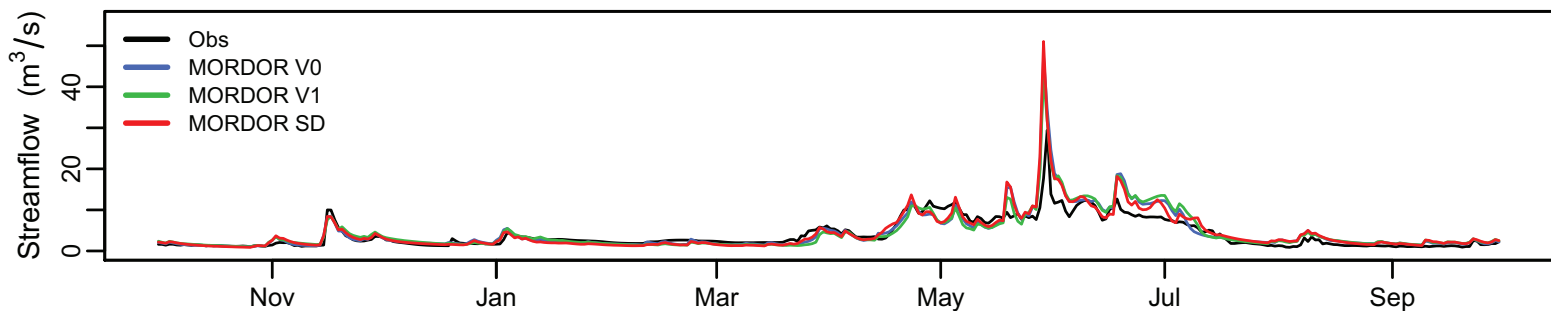

Year 1969

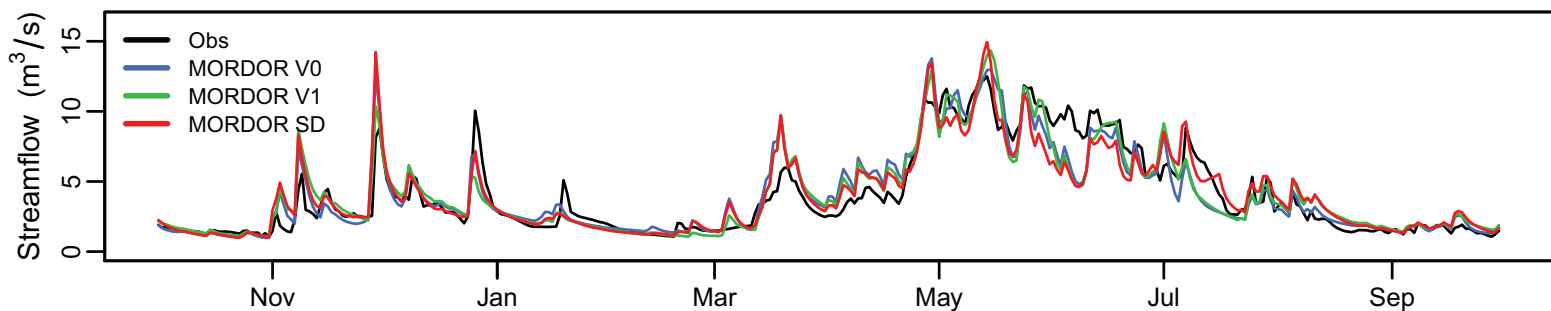

Year 1970

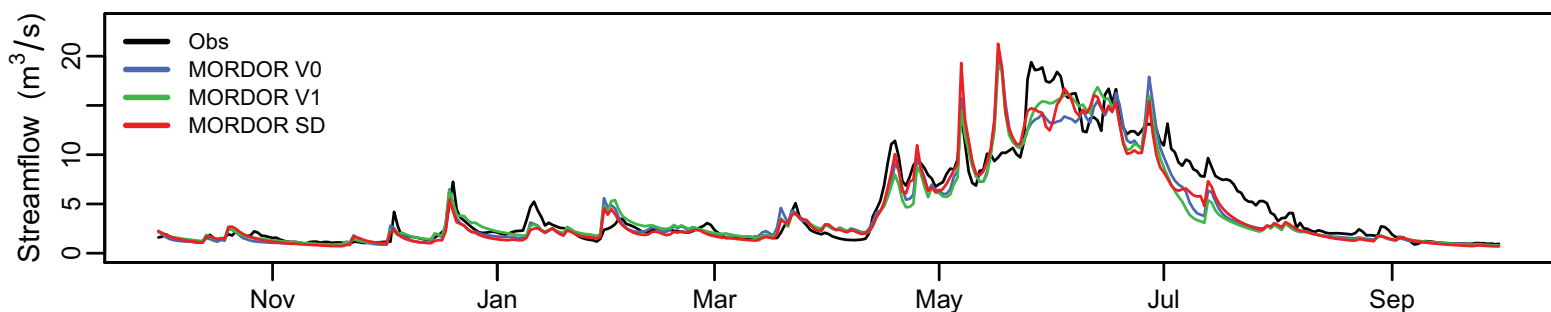

Year 1971

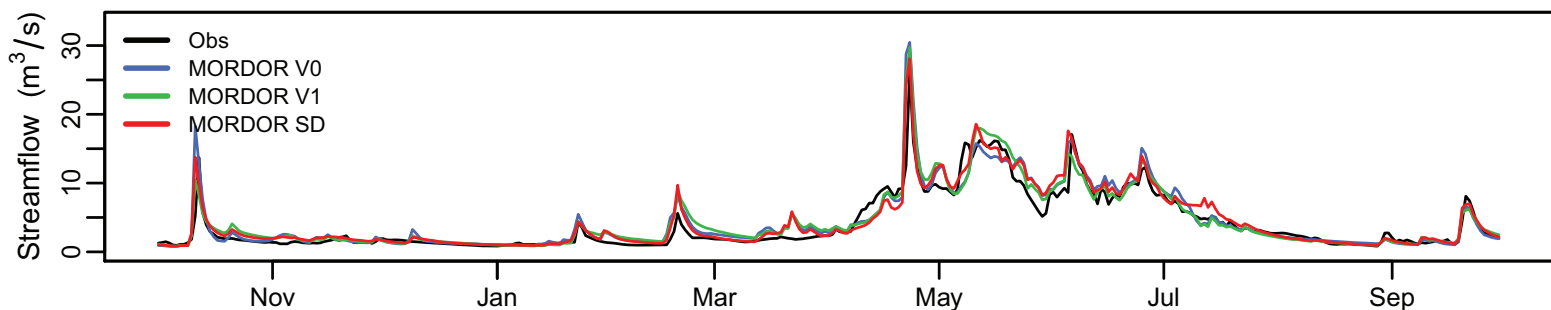

Year 1972

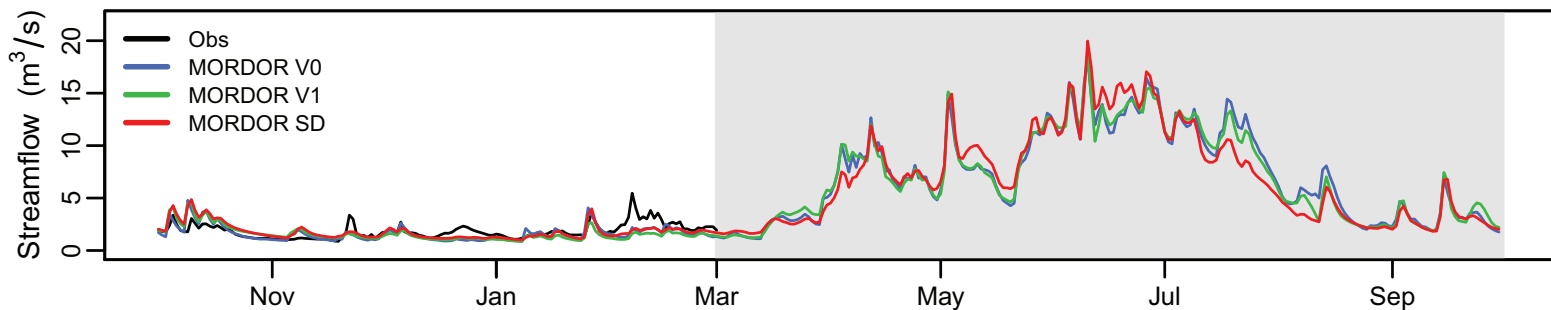

# Oriege@Campauleil

Year 1973

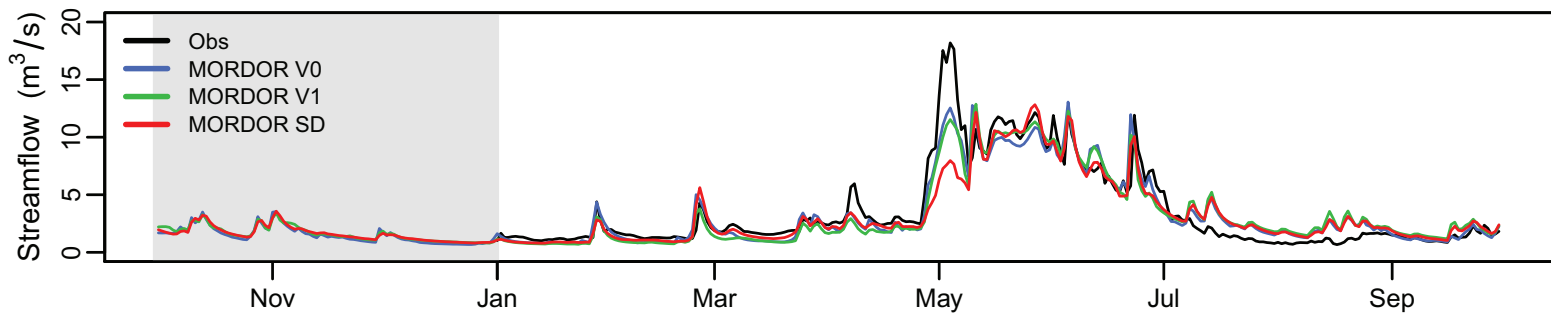

Year 1974

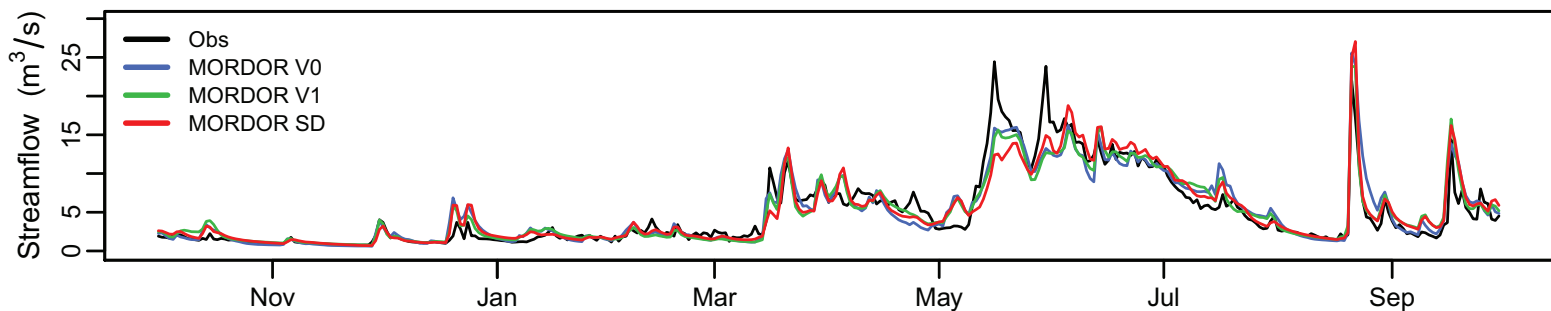

Year 1975

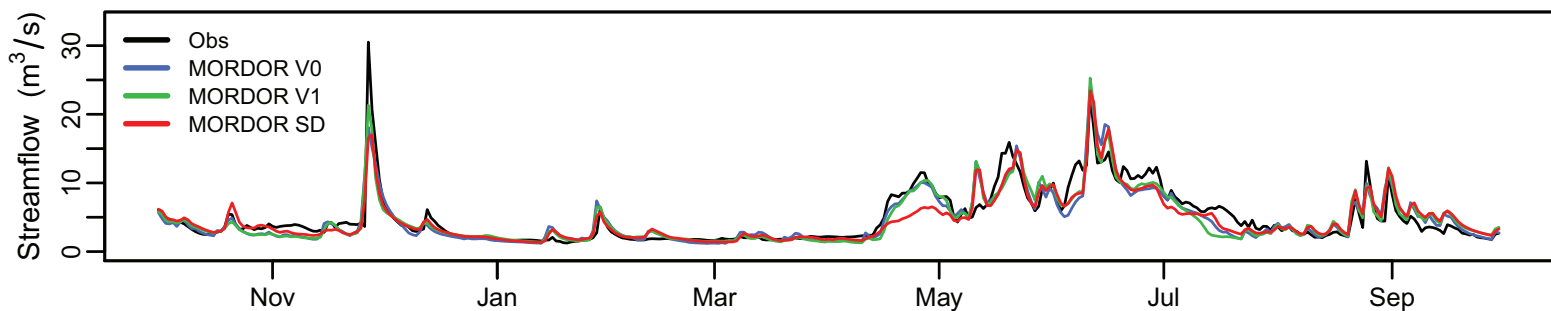

Year 1976

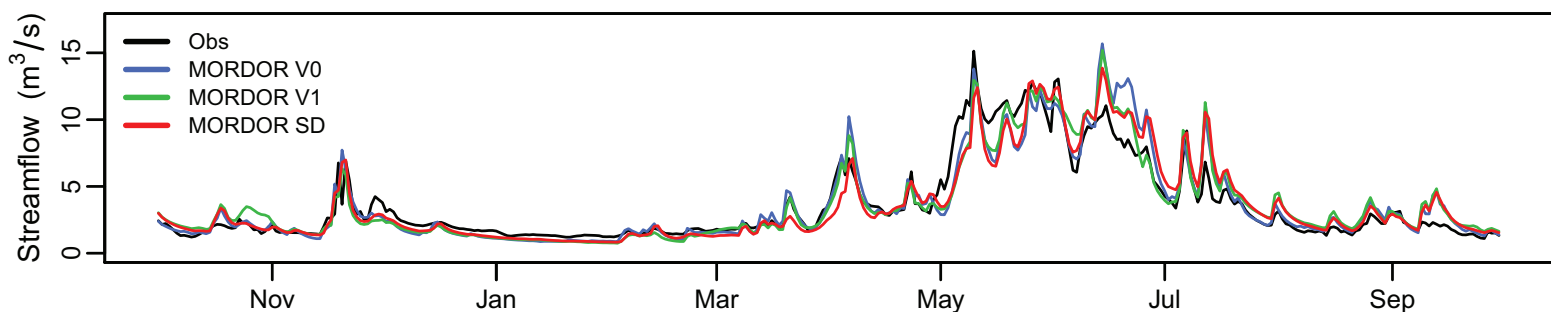

Year 1977

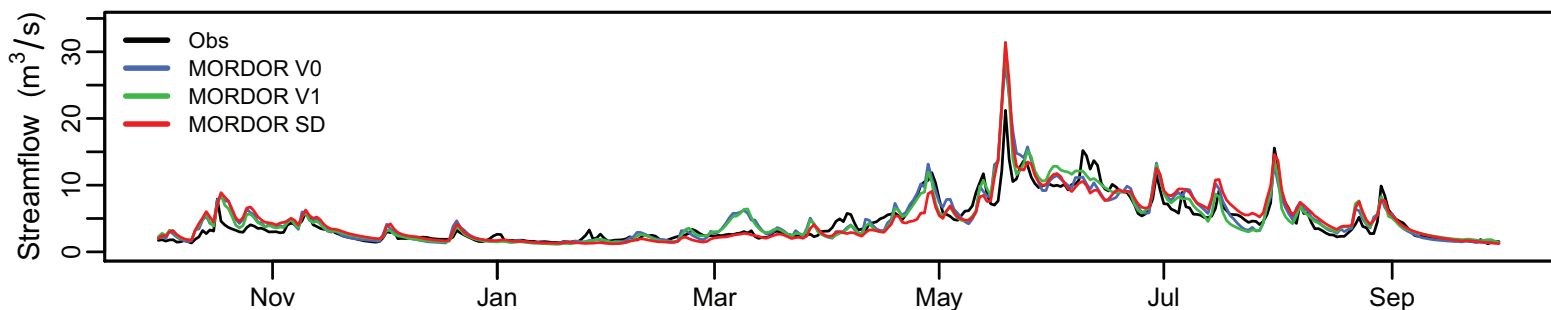

Year 1978

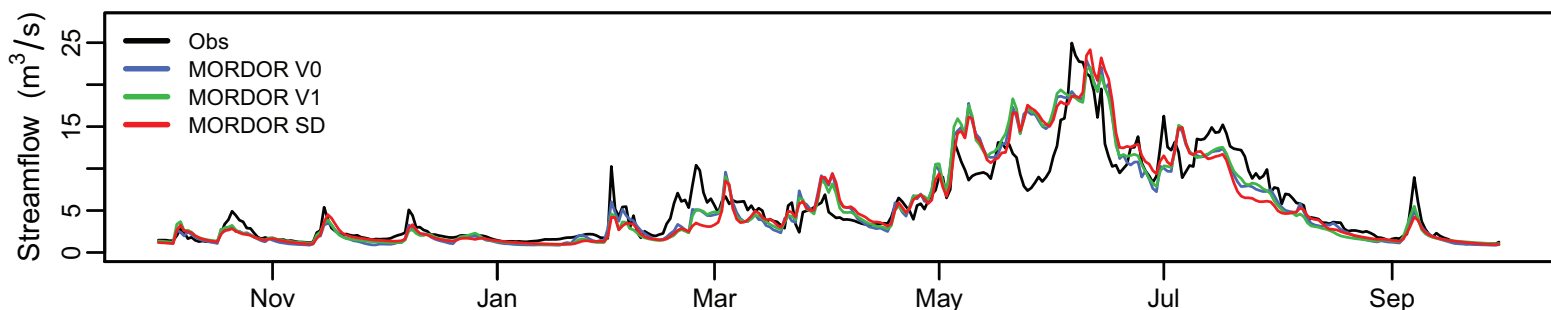

# Oriege@Campauleil

Year 1979

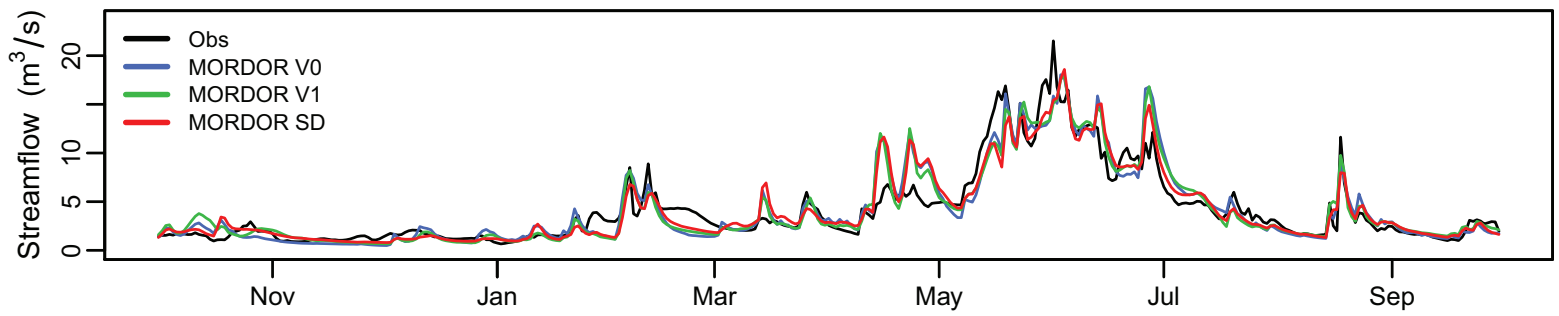

Year 1980

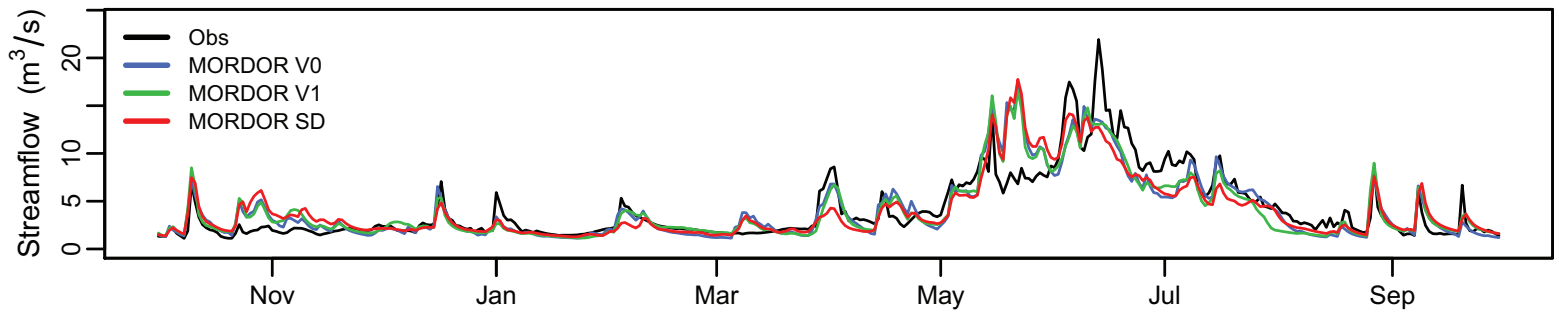

Year 1981

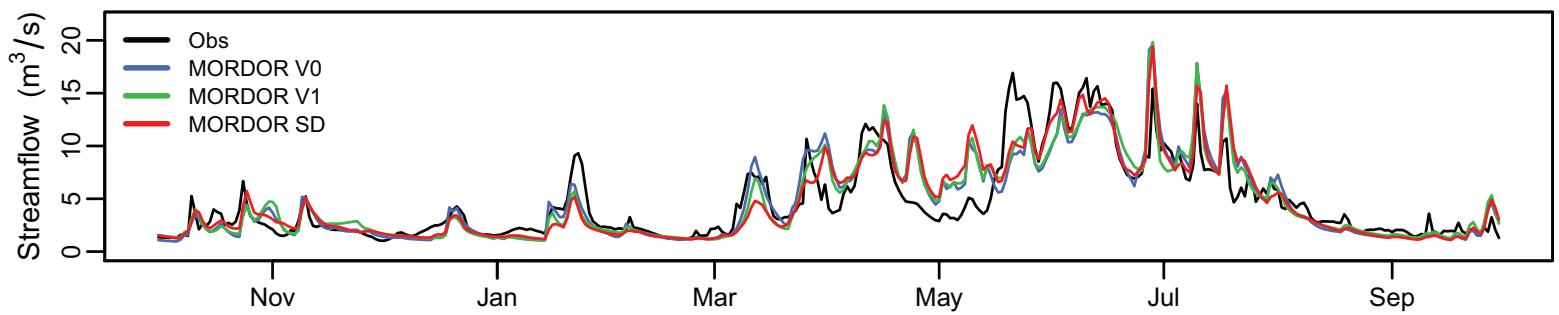

Year 1982

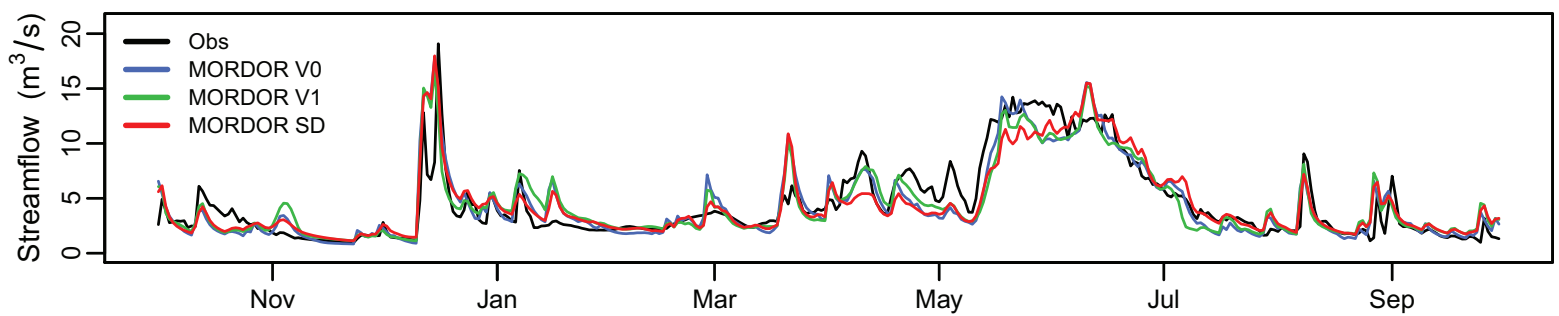

# Ouveze@Bedarrides

Year 1997

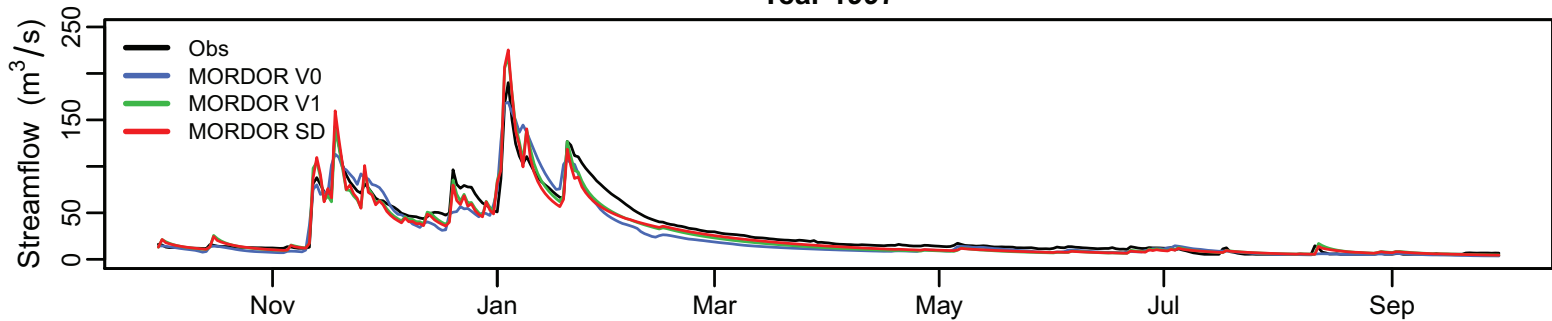

Year 1998

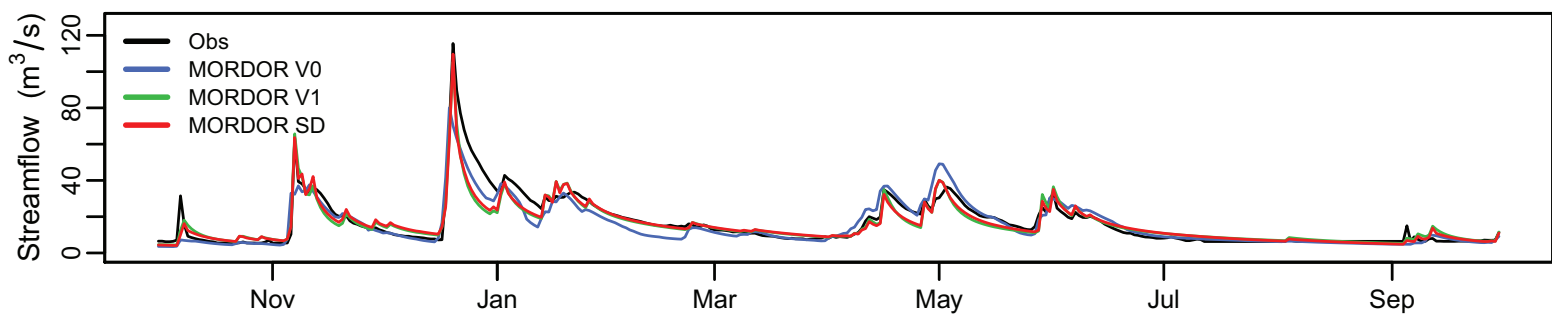

Year 1999

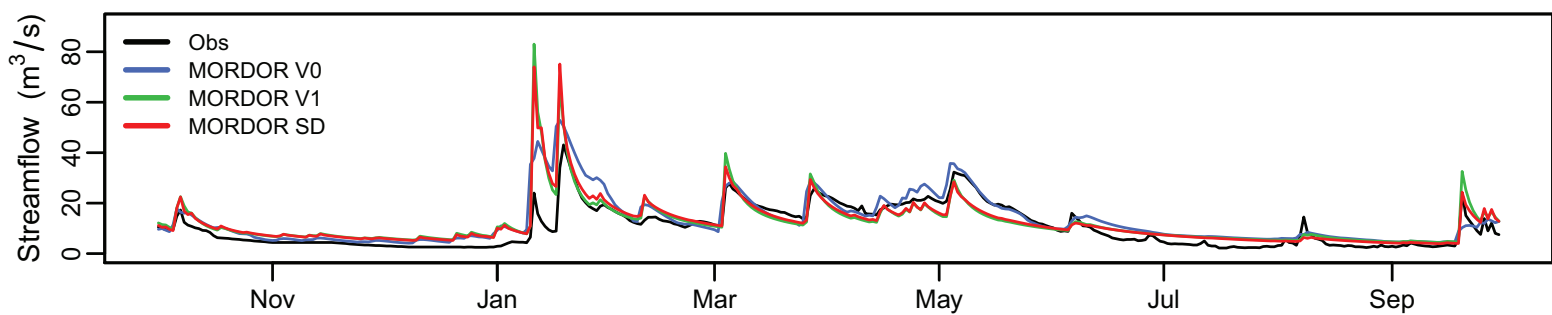

Year 2000

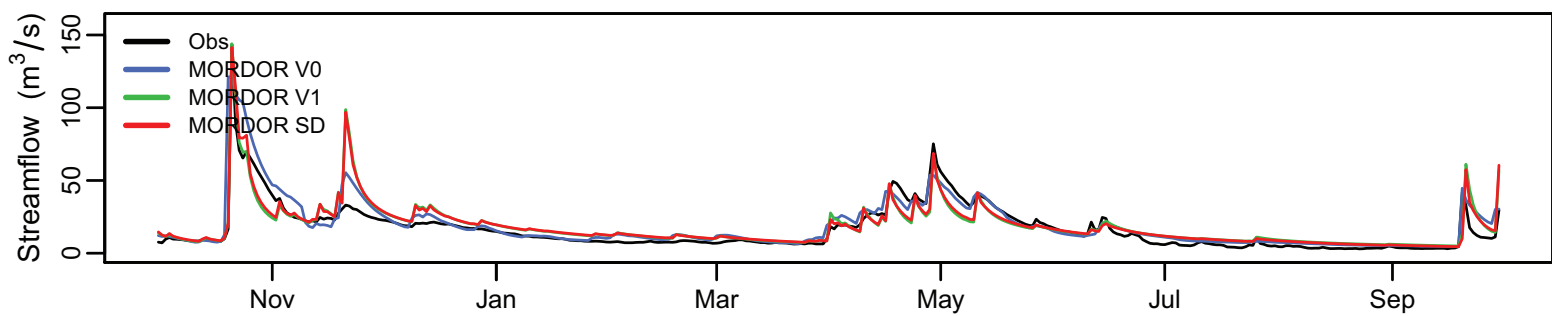

Year 2001

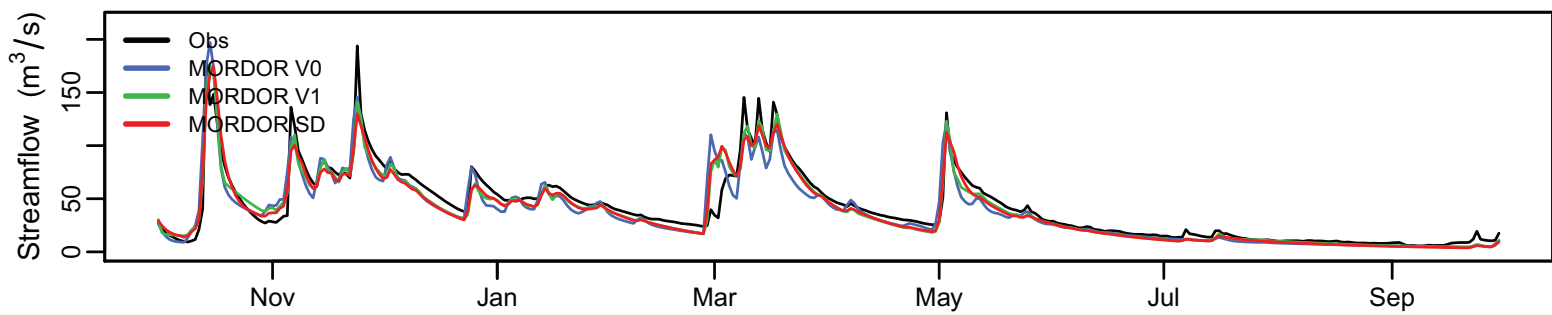

Year 2002

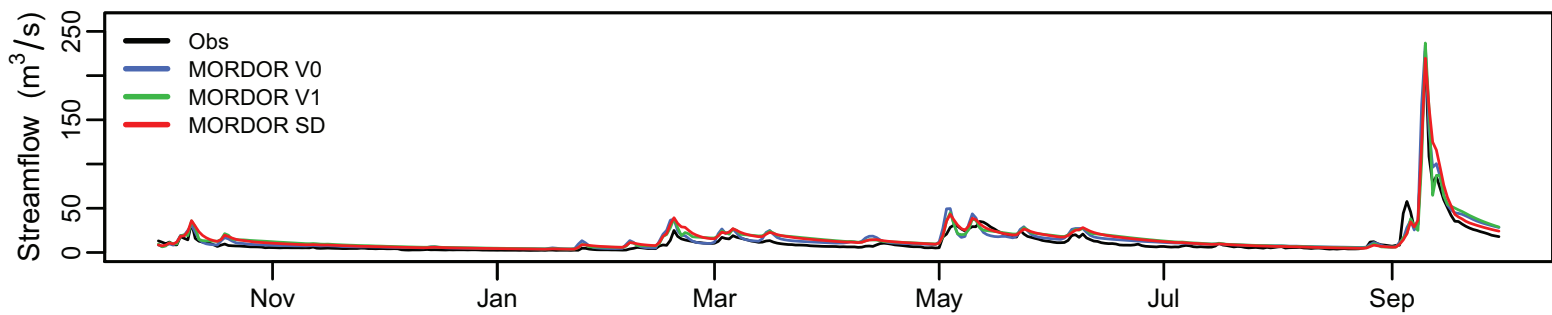

# Ouveze@Bedarrides

Year 2003

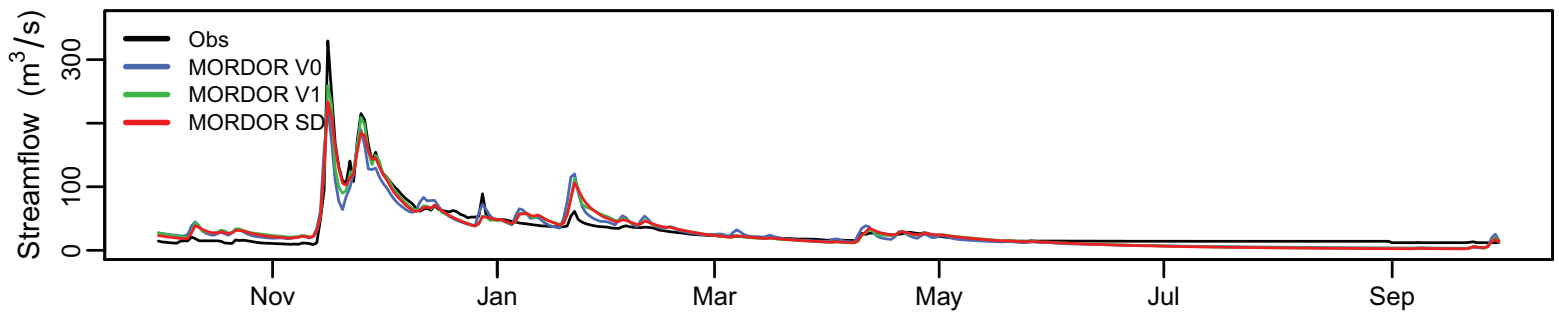

Year 2004

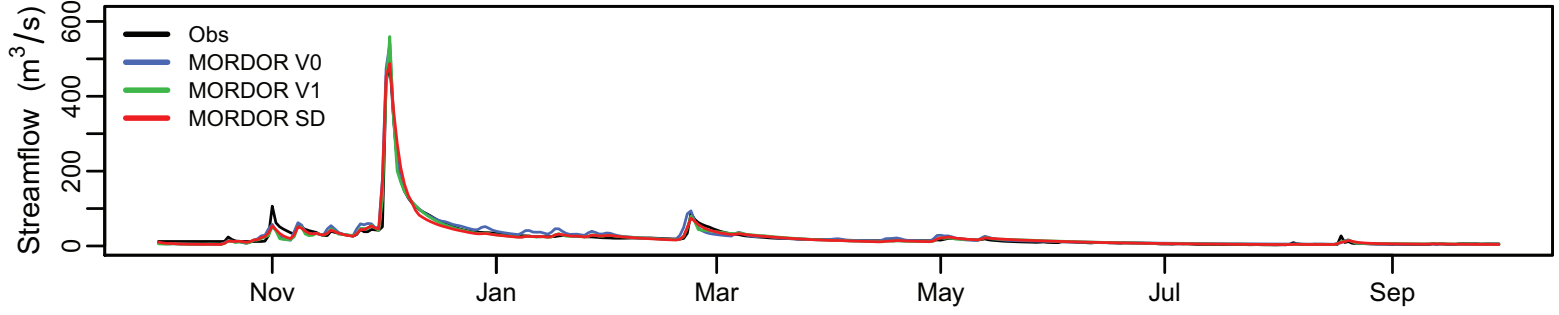

# Rizzanese@Barrage

Year 1994

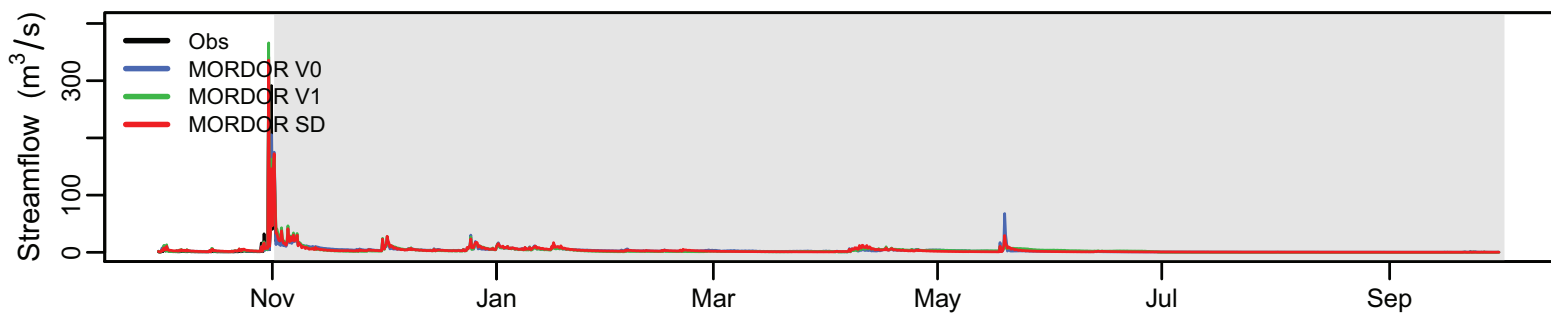

Year 1995

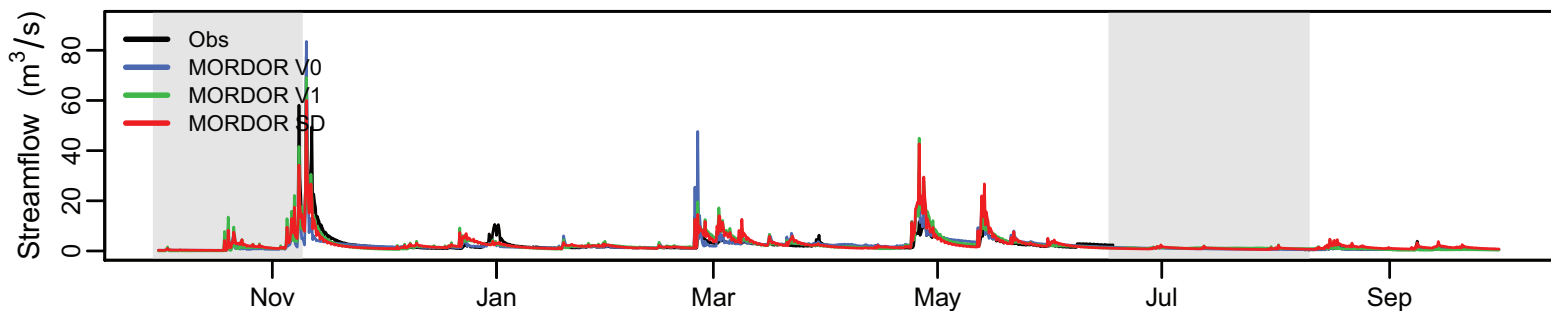

Year 1996

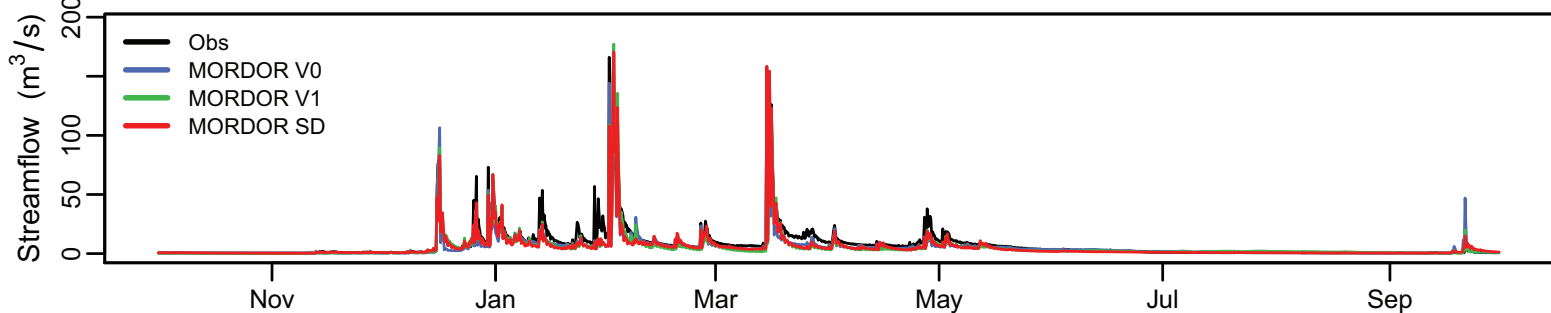

Year 1997

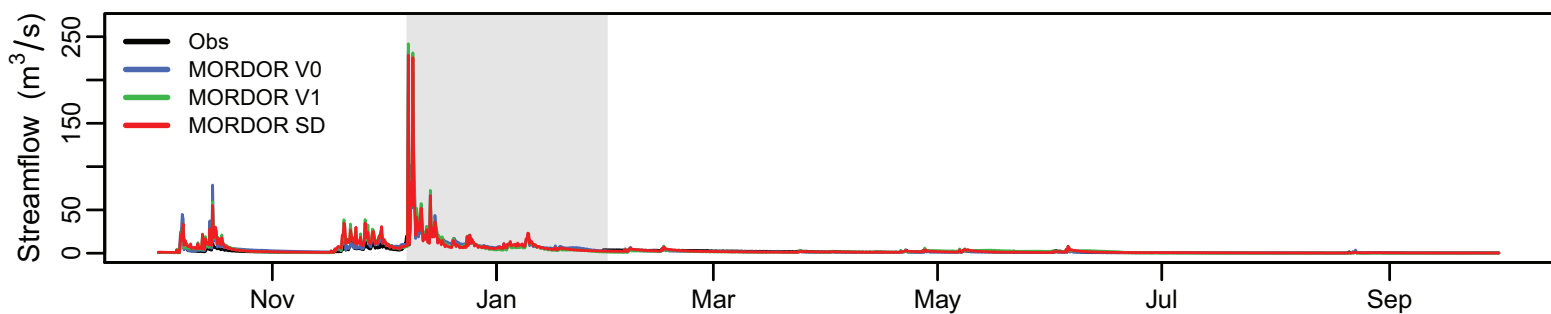

Year 1998

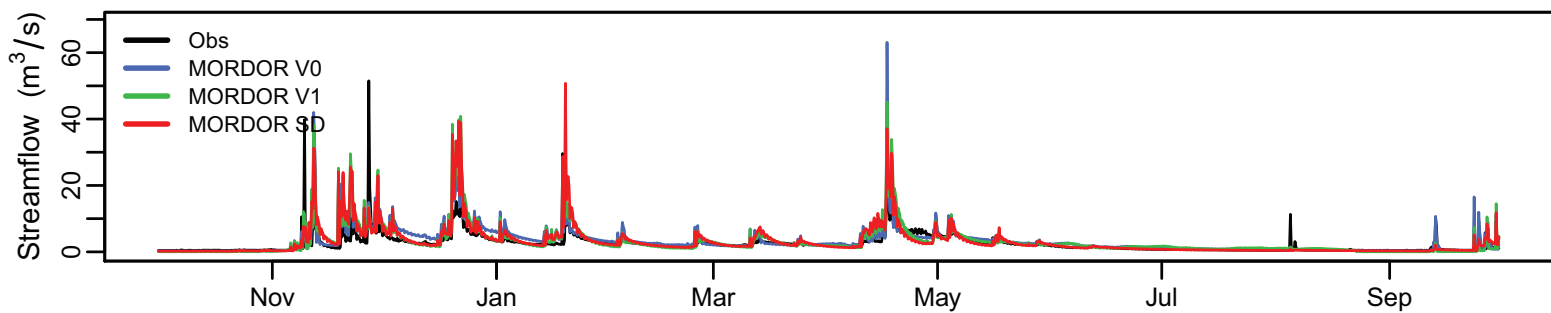

Year 1999

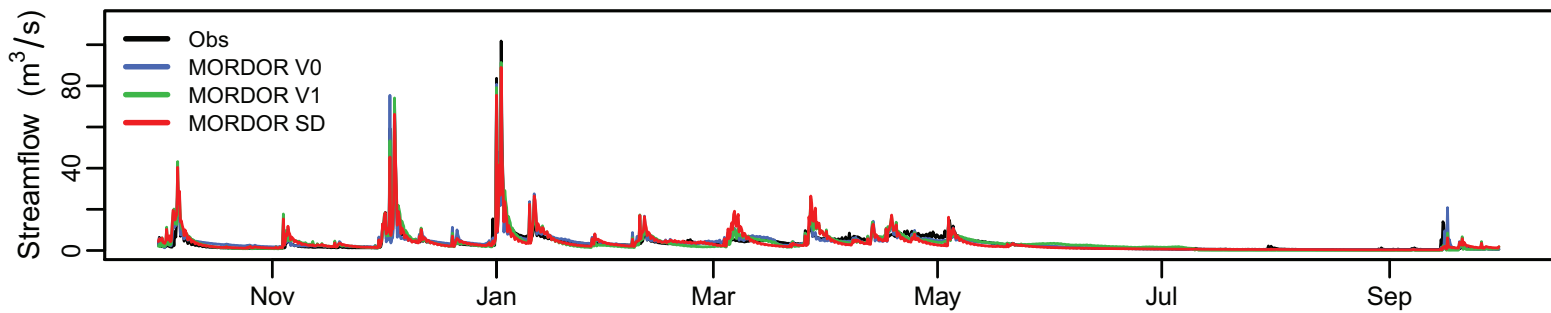

# Rizzanese@Barrage

Year 2000

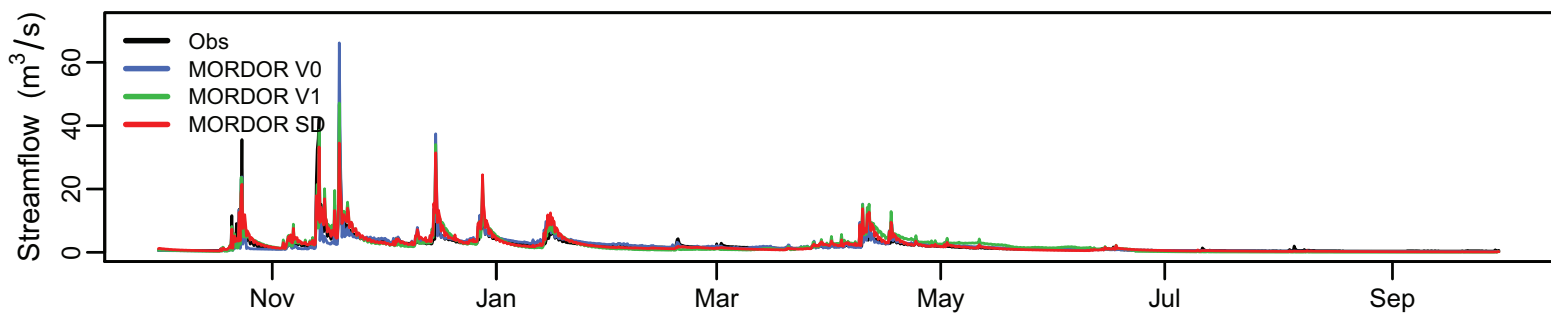

Year 2001

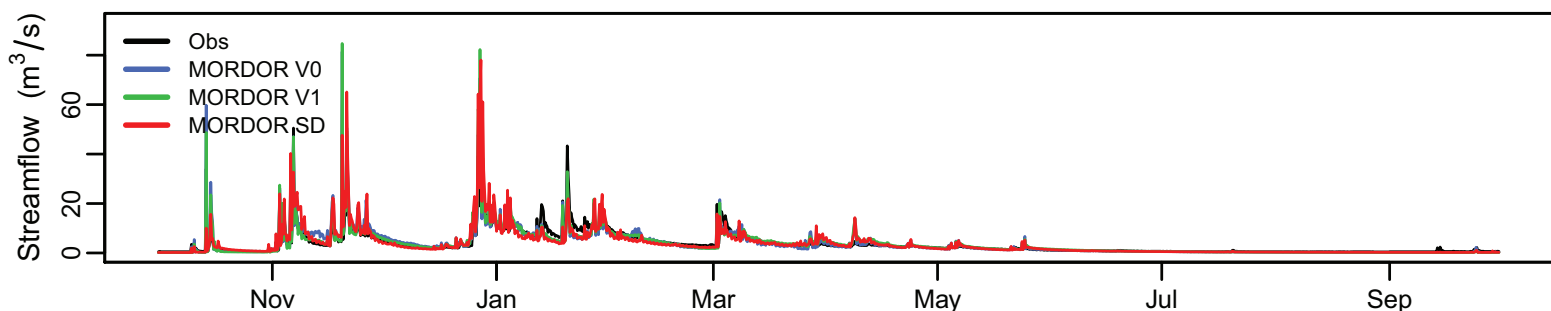

Year 2002

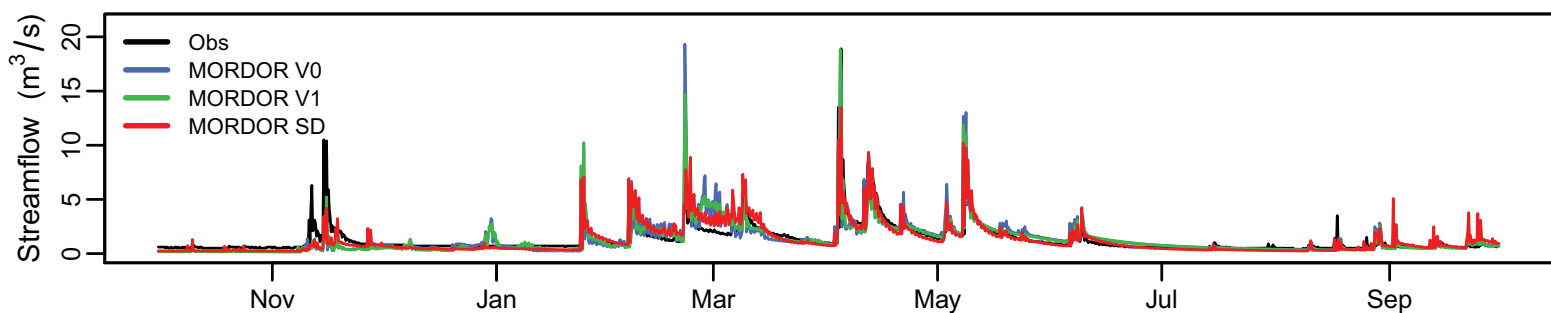

Year 2003

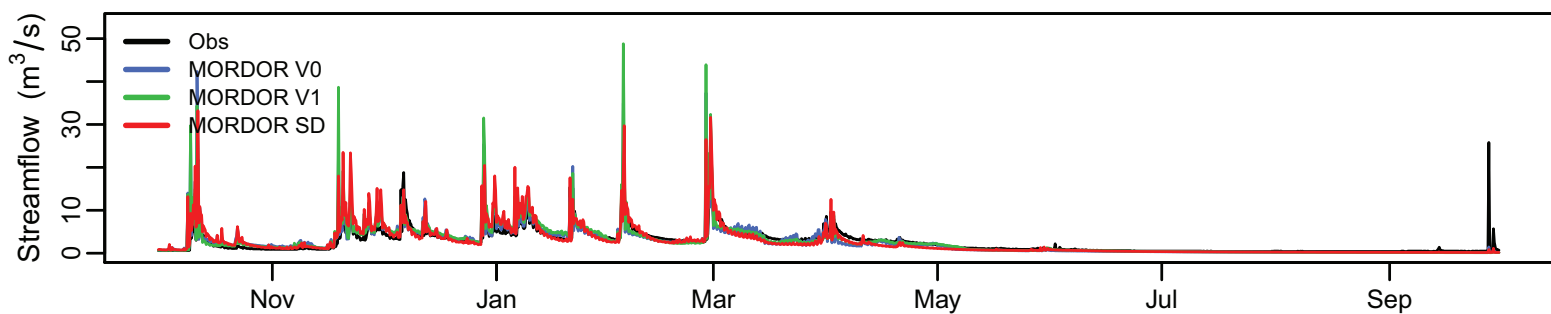

Year 2004

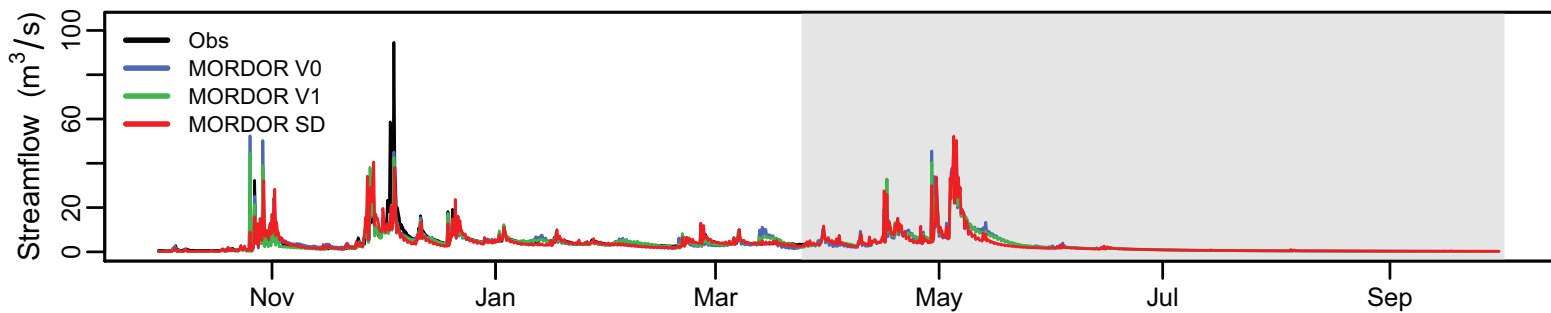

Year 2005

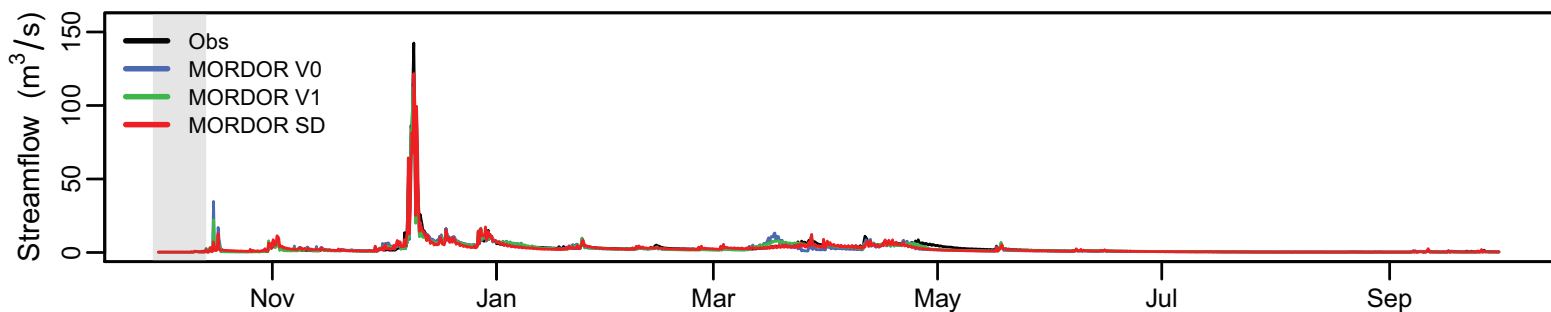

# Rizzanese@Barrage

Year 2006

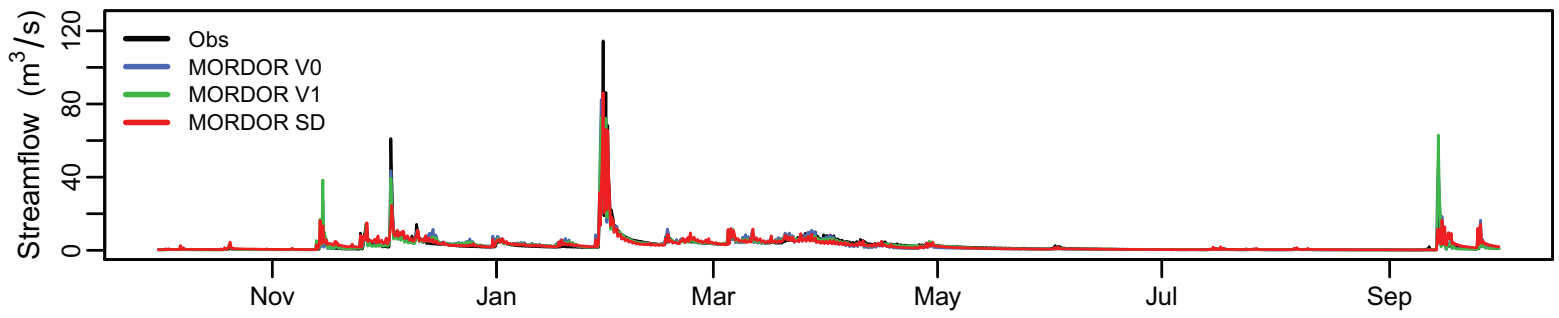

Year 2007

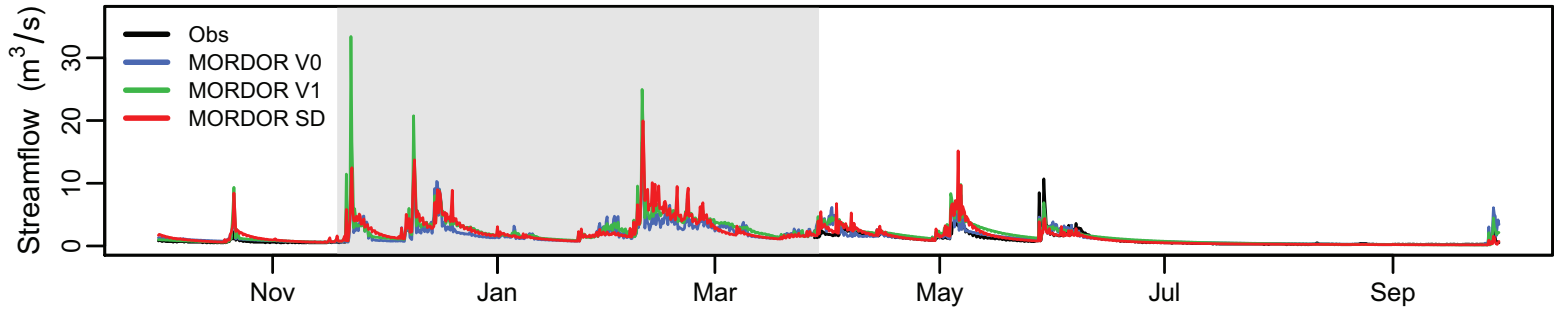



# Romanche@Chambon

Year 1986

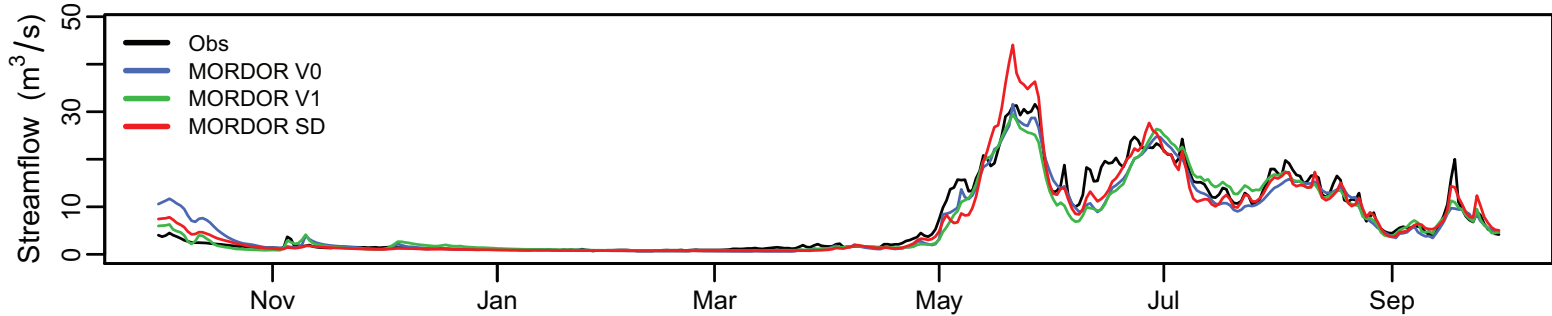

Year 1987

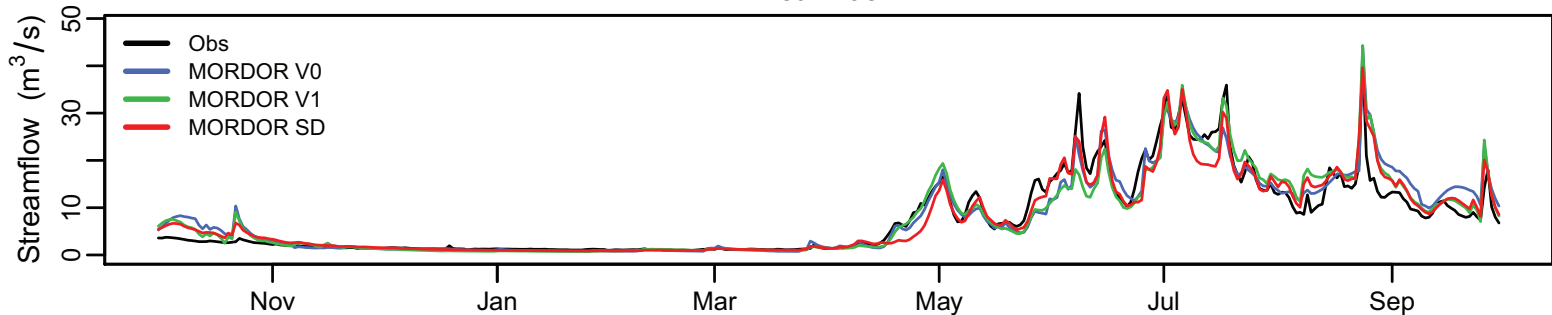

Year 1988

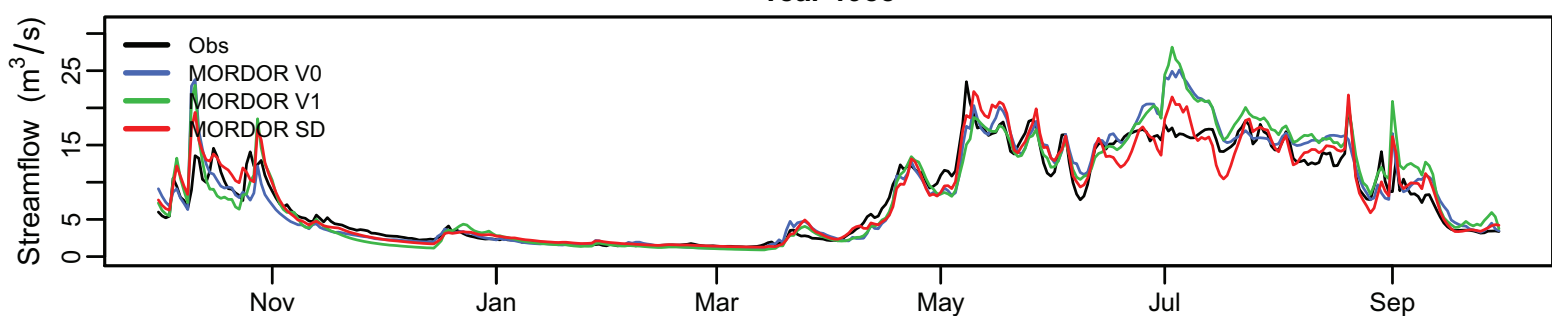

Year 1989

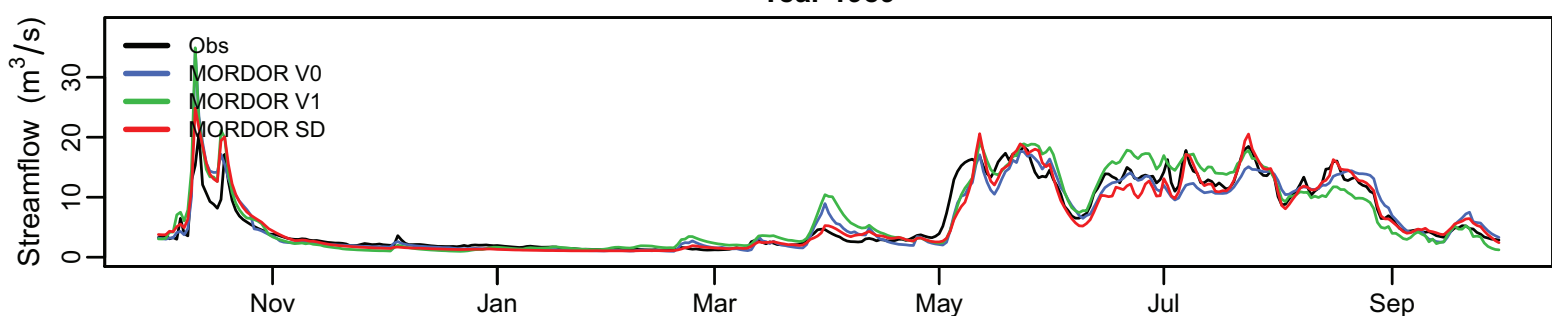

Year 1990

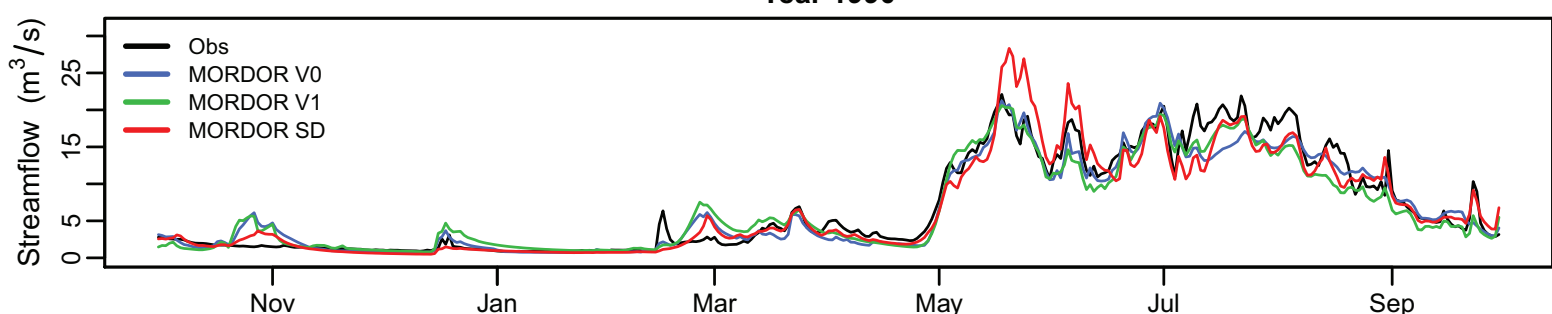

Year 1991

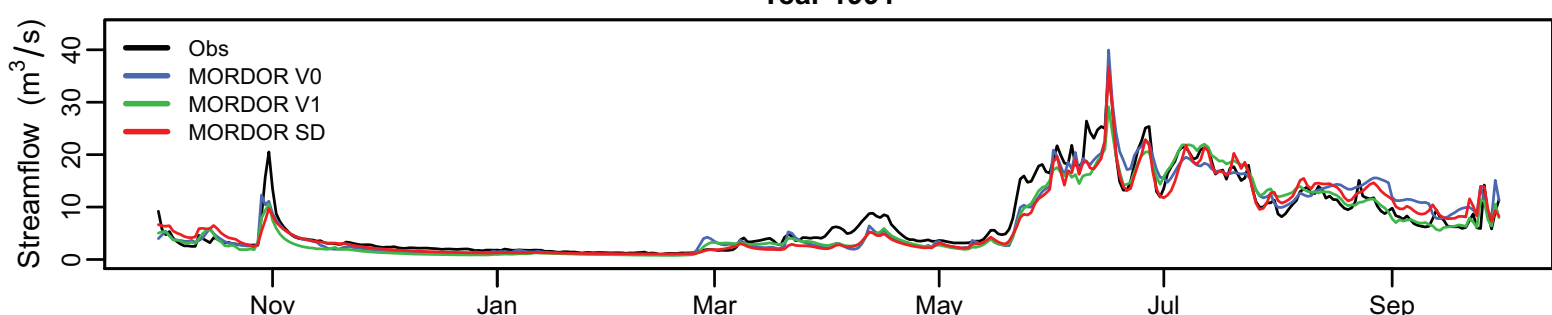

# Romanche@Chambon

Year 1992

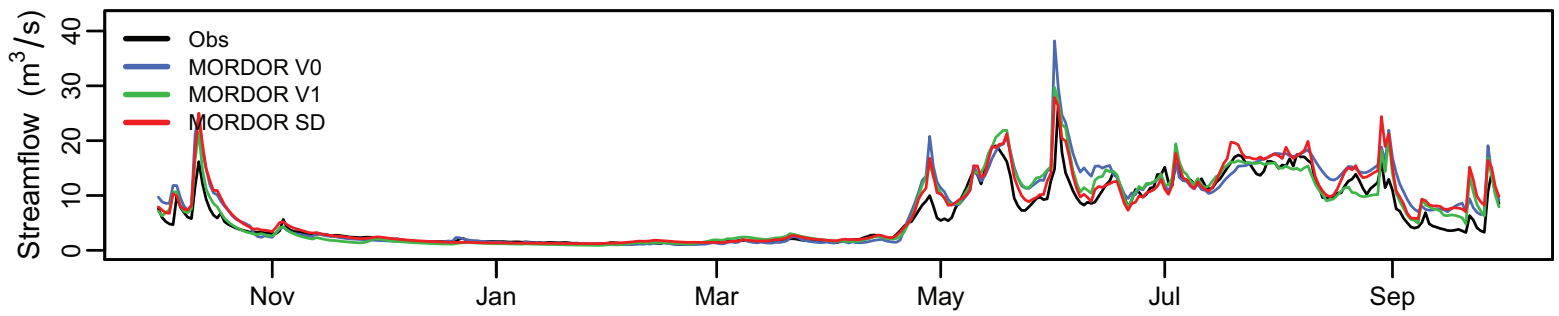

Year 1993

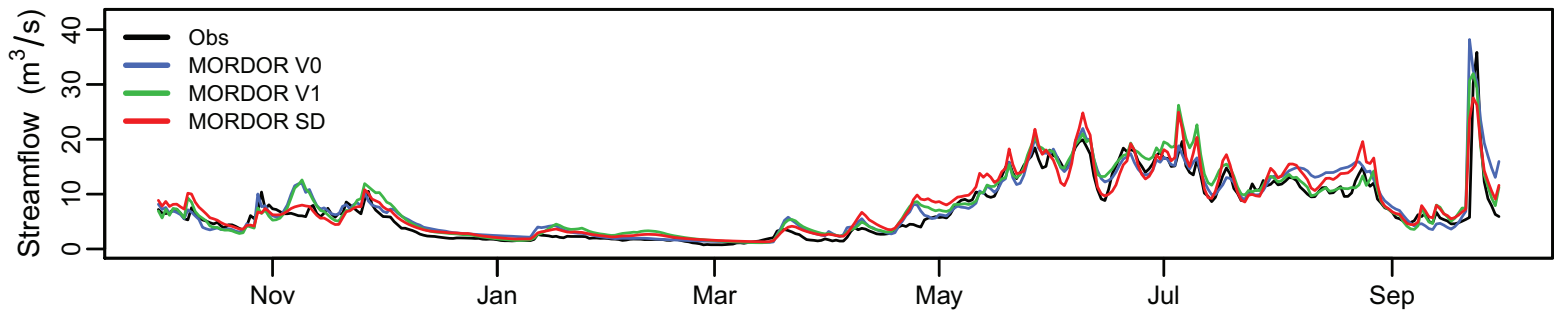

Year 1994

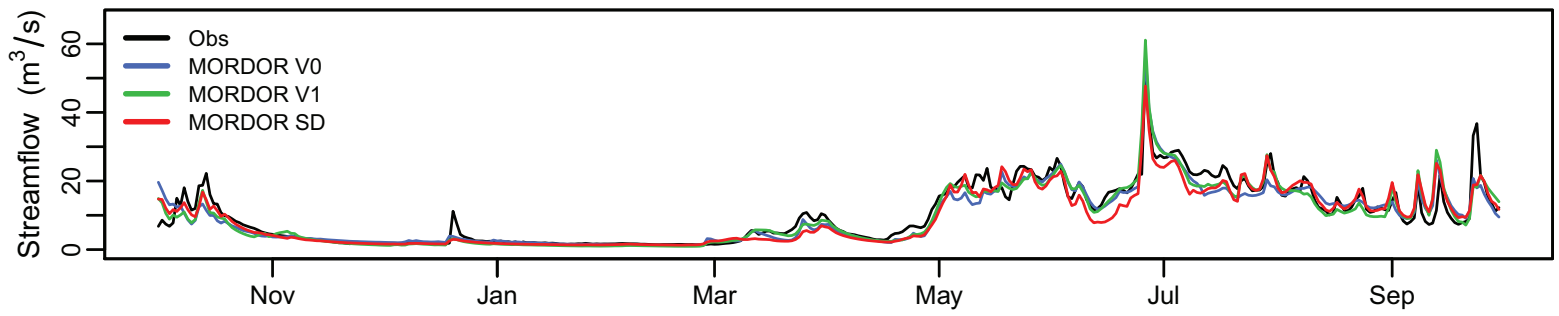

Year 1995

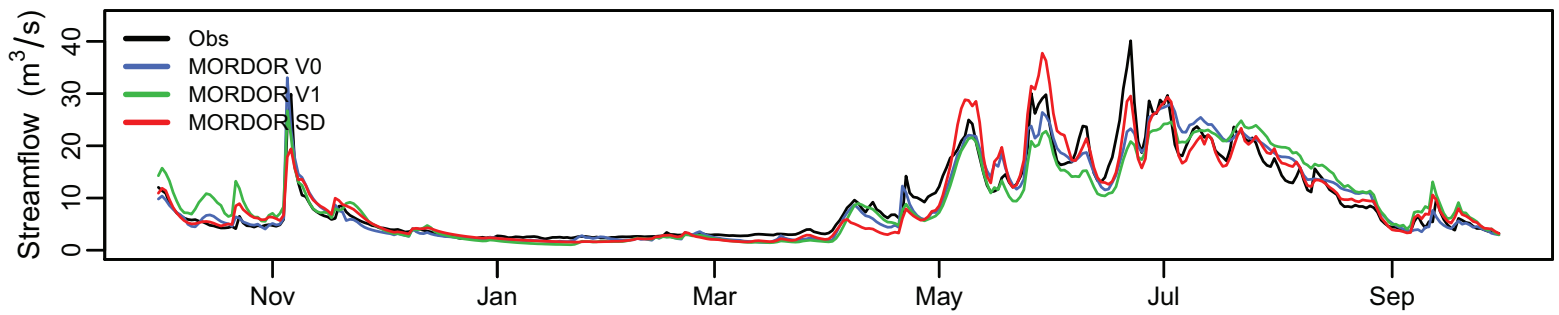

Year 1996

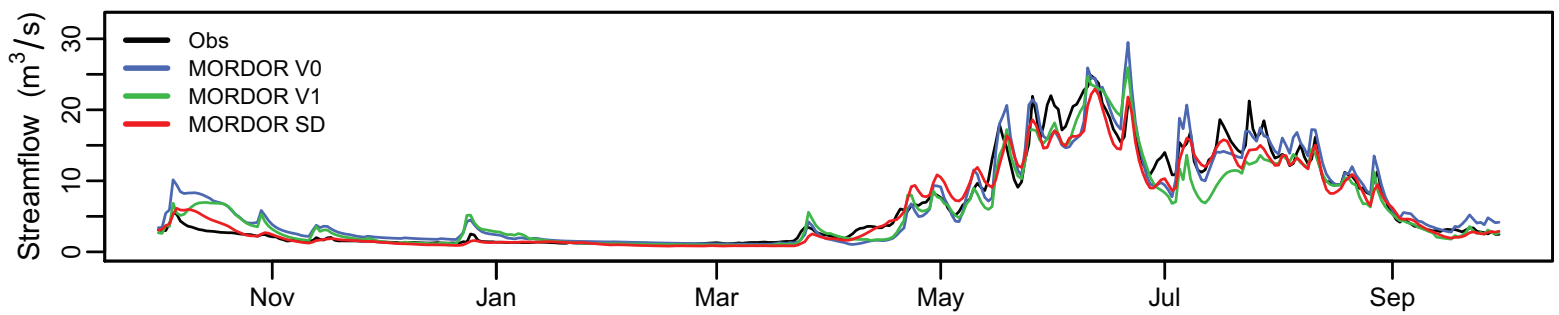

Year 1997

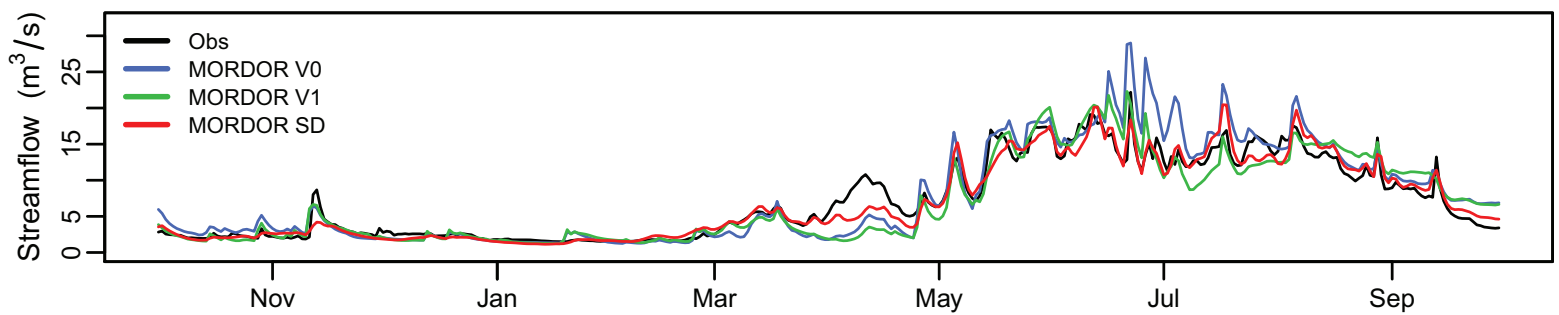

# Romanche@Chambon

Year 1998

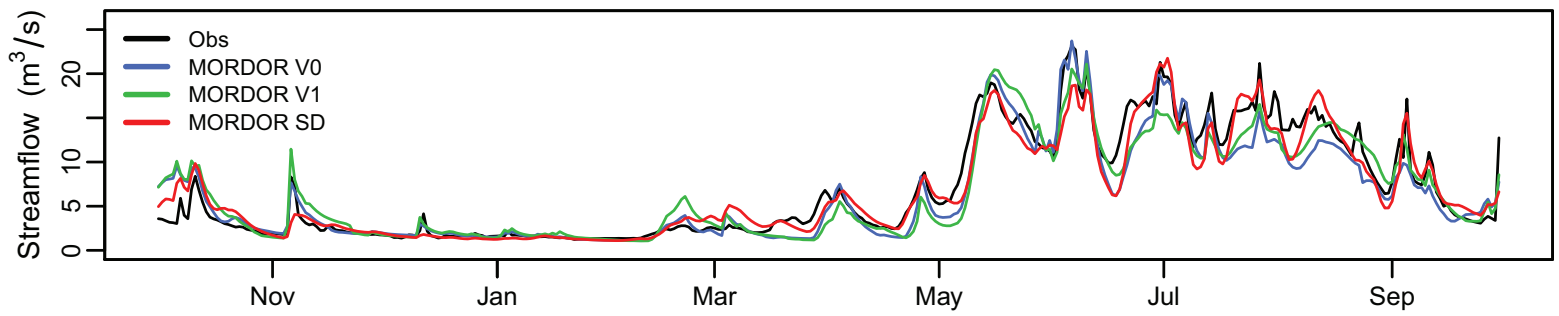

Year 1999

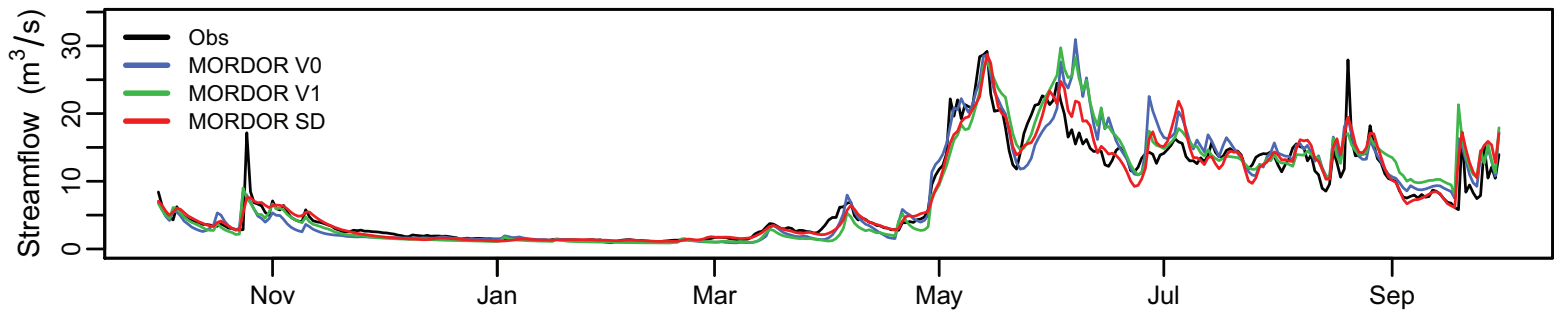

Year 2000

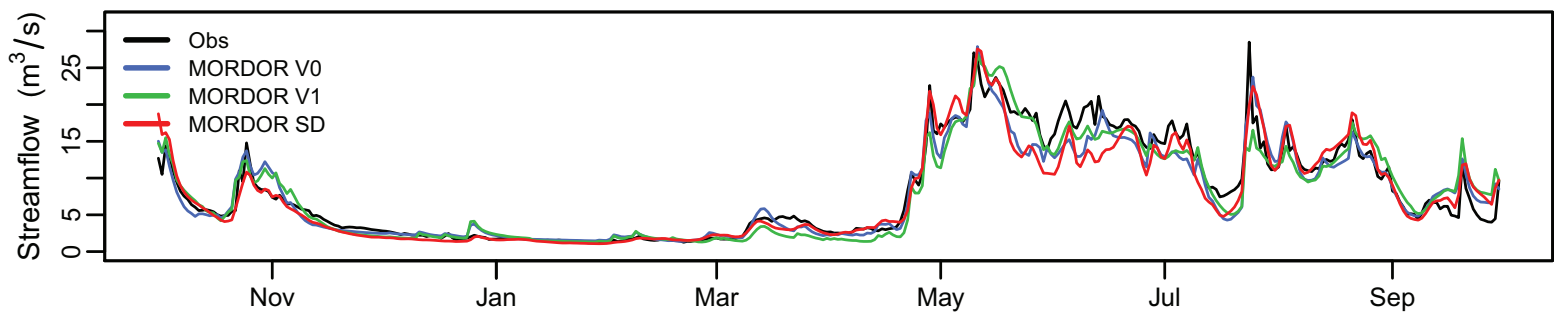

Year 2001

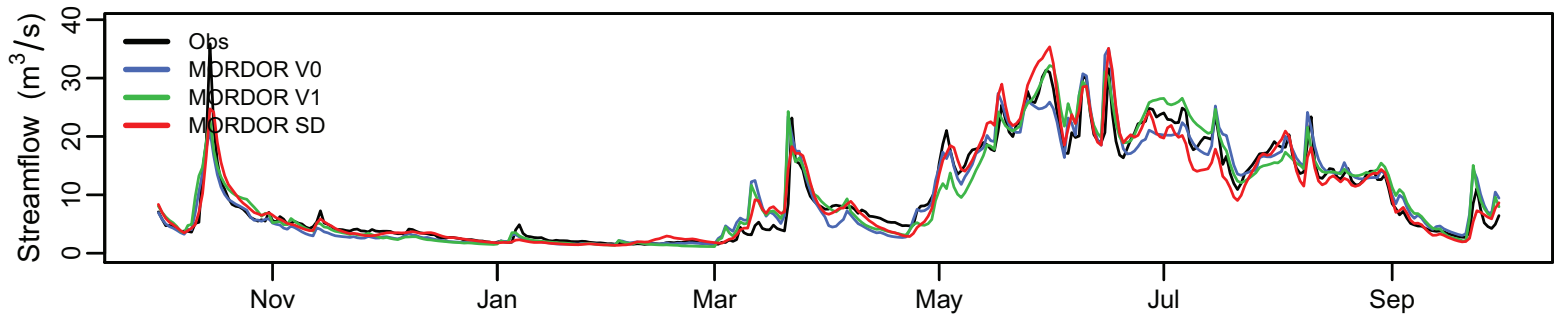

Year 2002

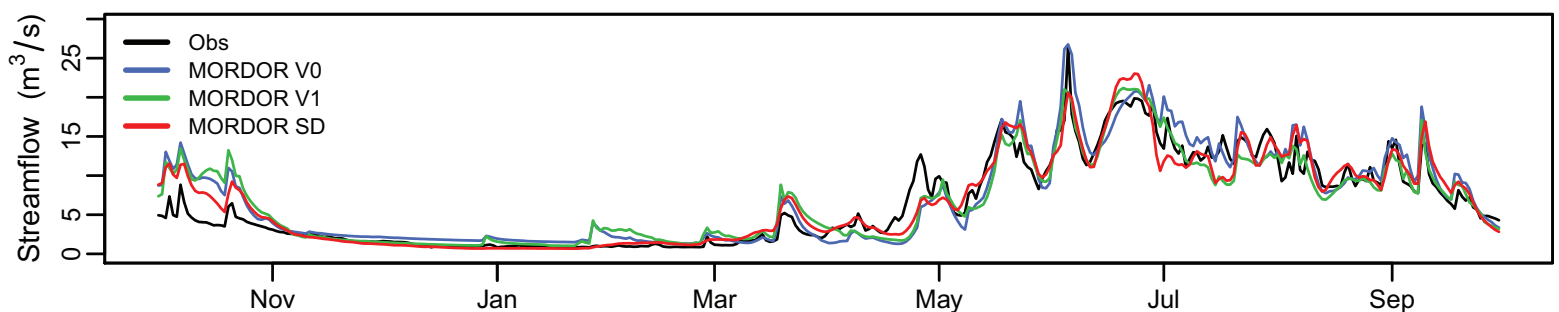

Year 2003

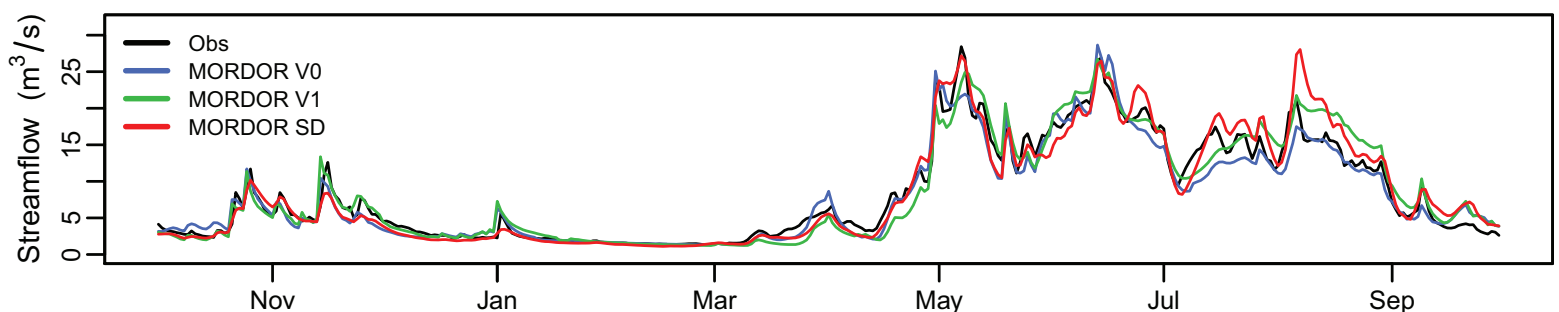

# Romanche@Chambon

Year 2004

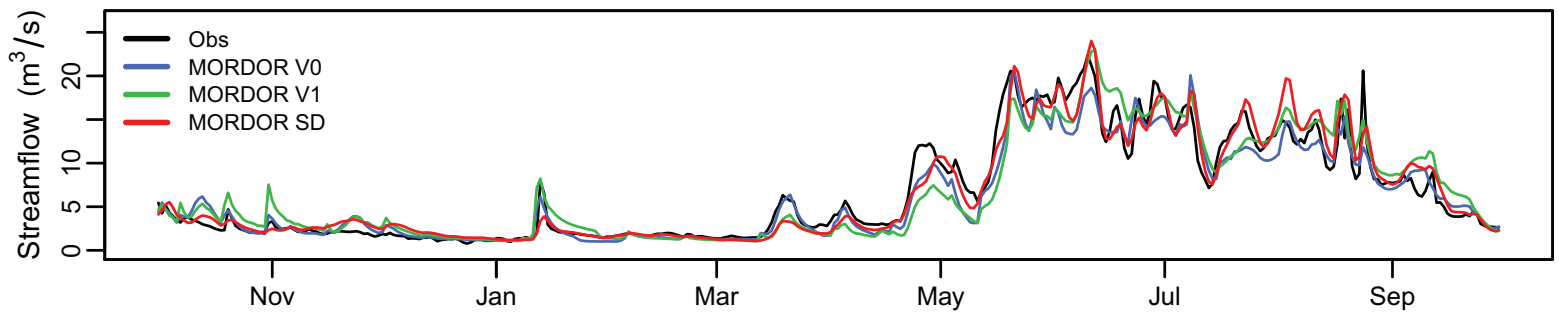

Year 2005

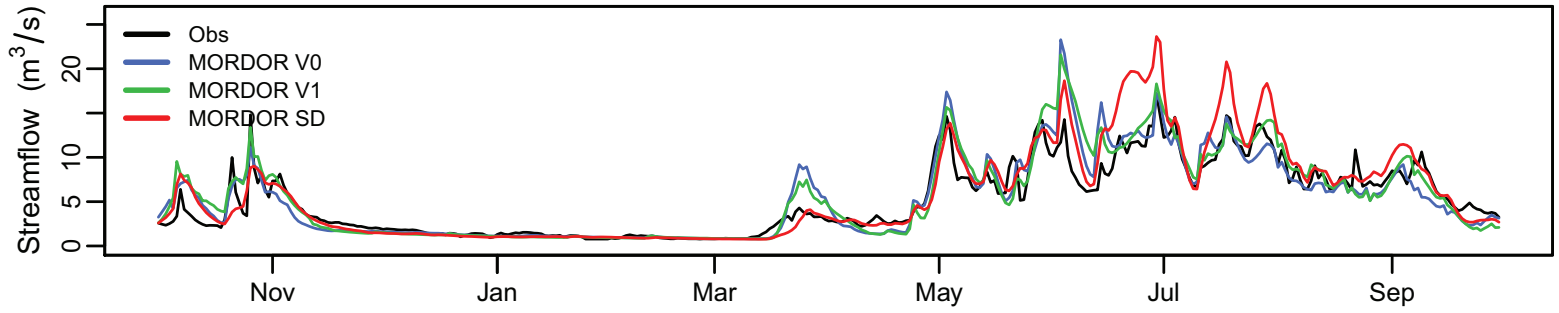

# Roya@Breil

Year 1988

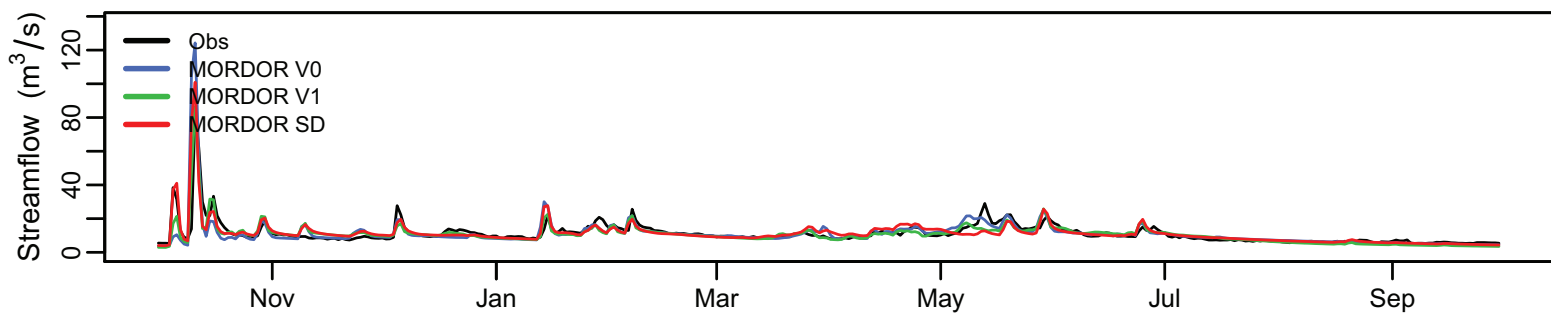

Year 1989

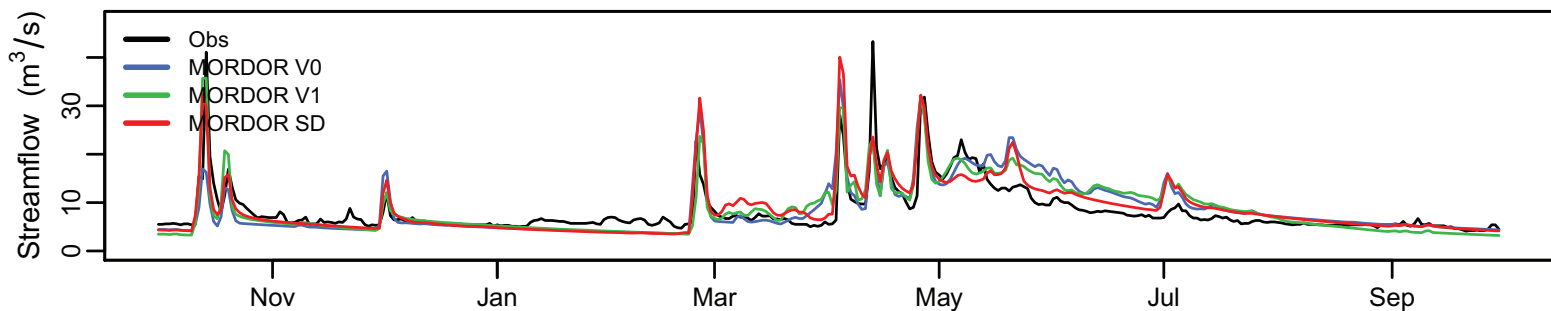

Year 1990

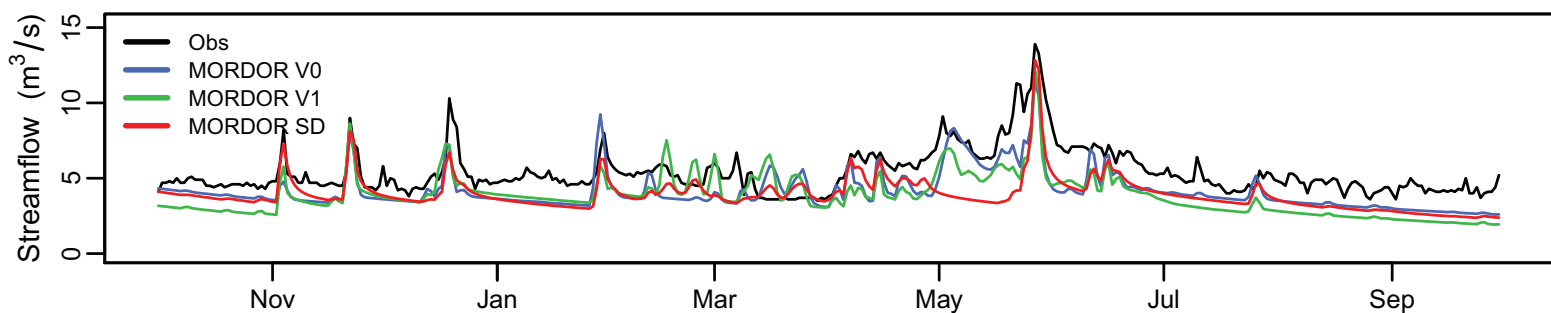

Year 1991

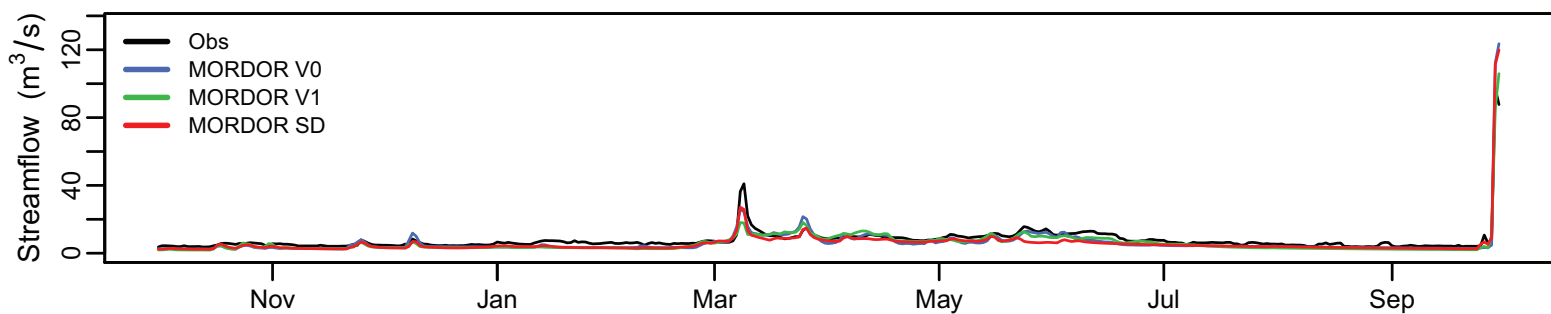

Year 1992

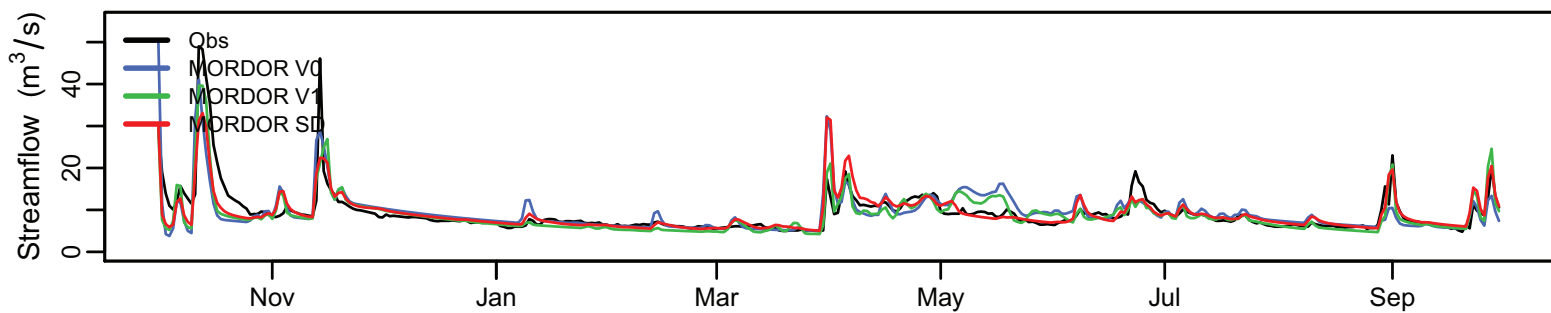

Year 1993

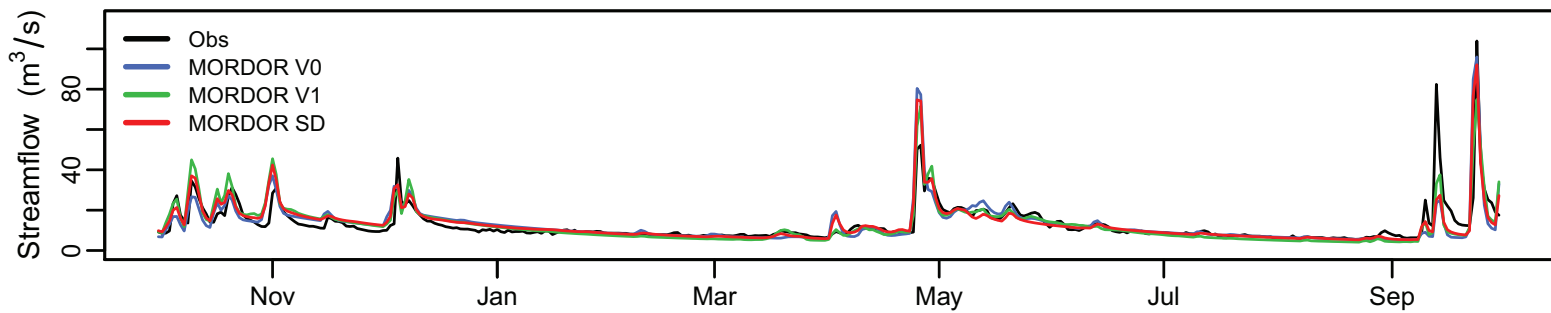

# Roya@Breil

Year 1994

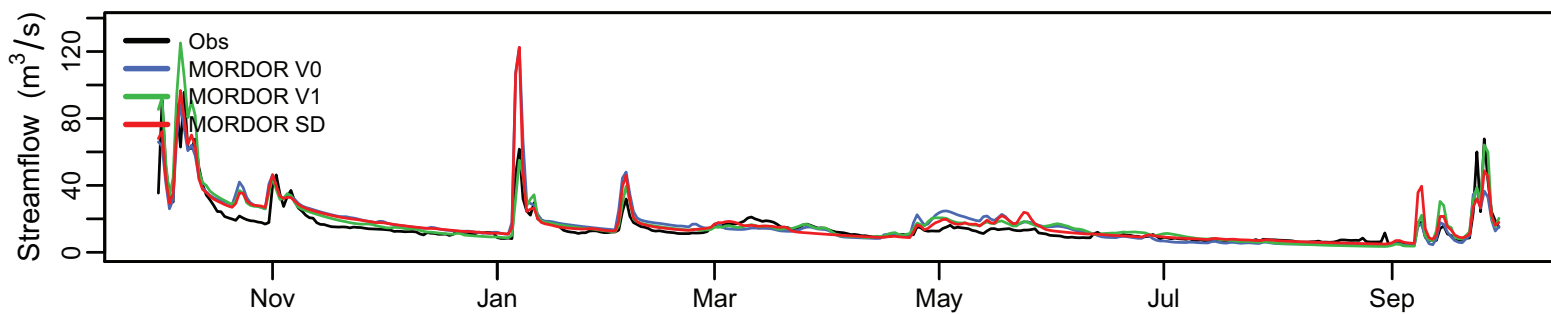

Year 1995

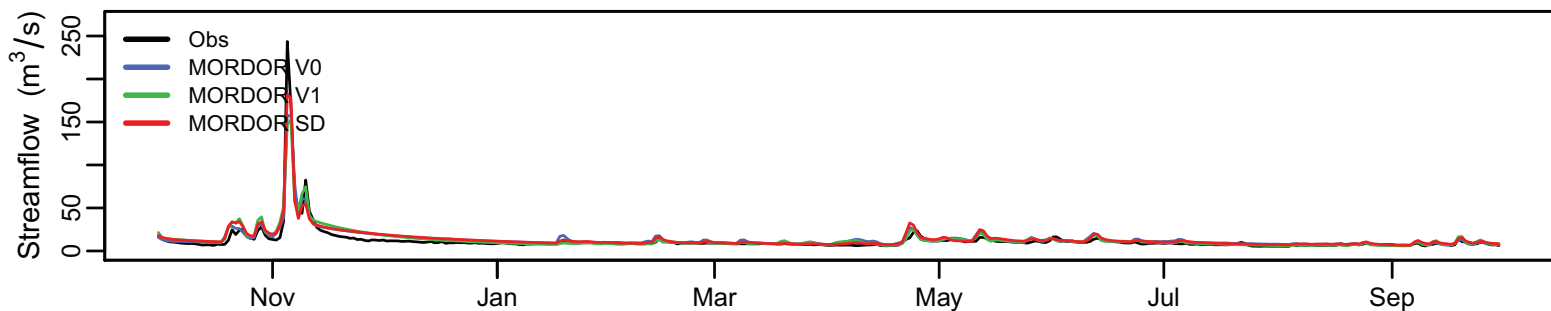

Year 1996

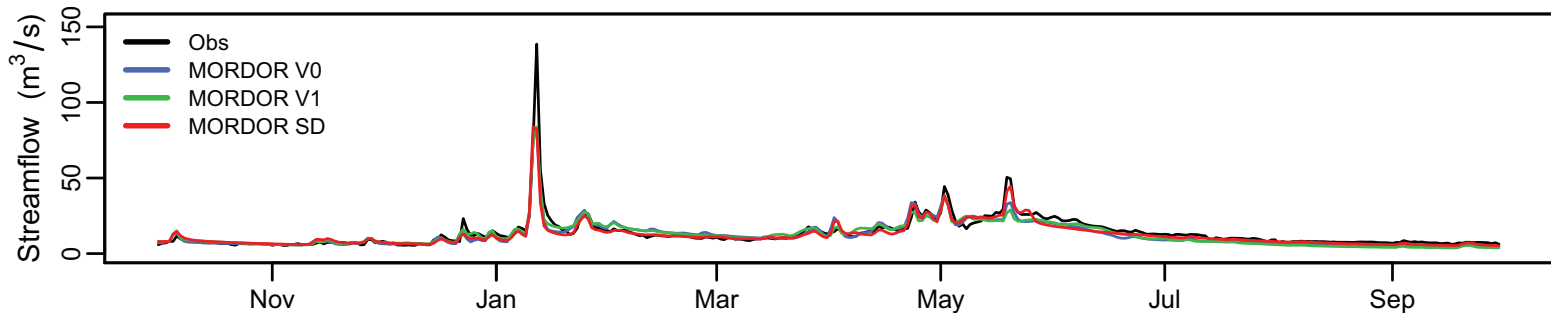

Year 1997

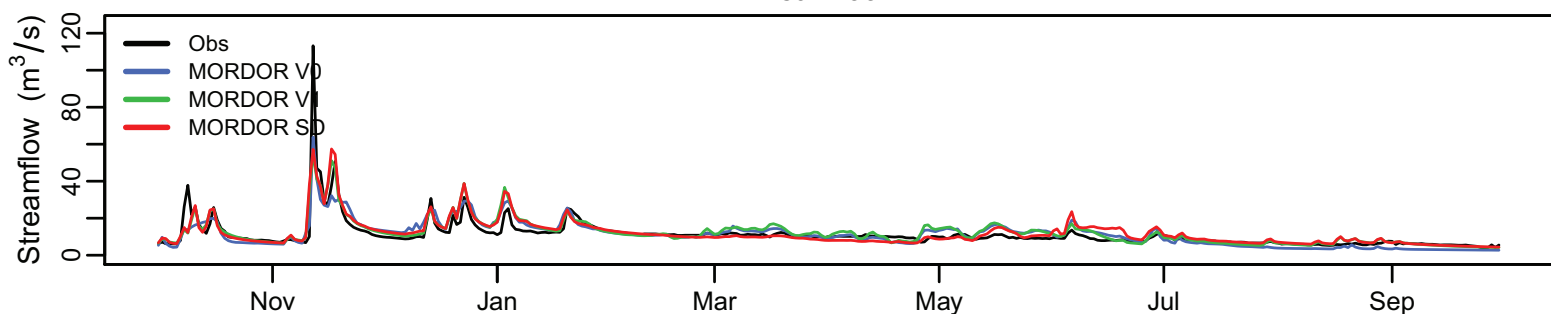

Year 1998

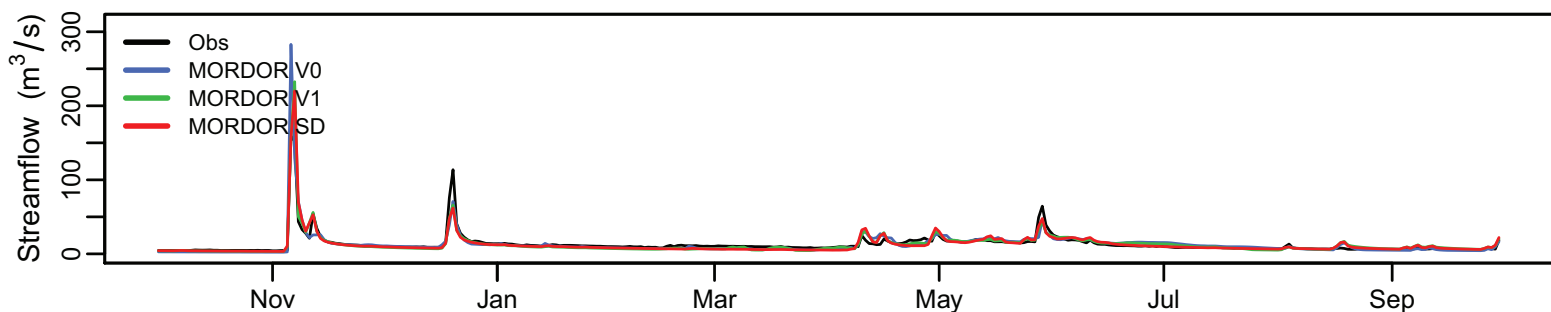

Year 1999

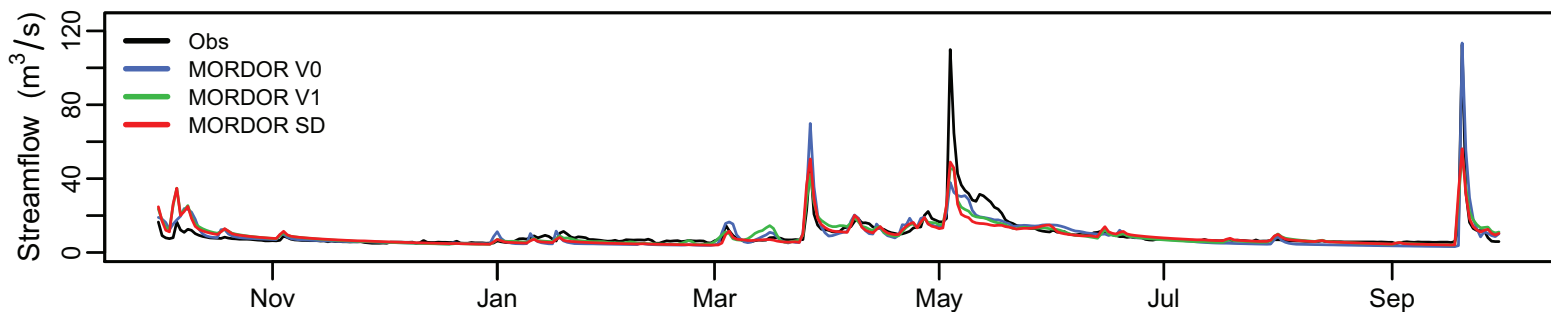

# Roya@Breil

Year 2000

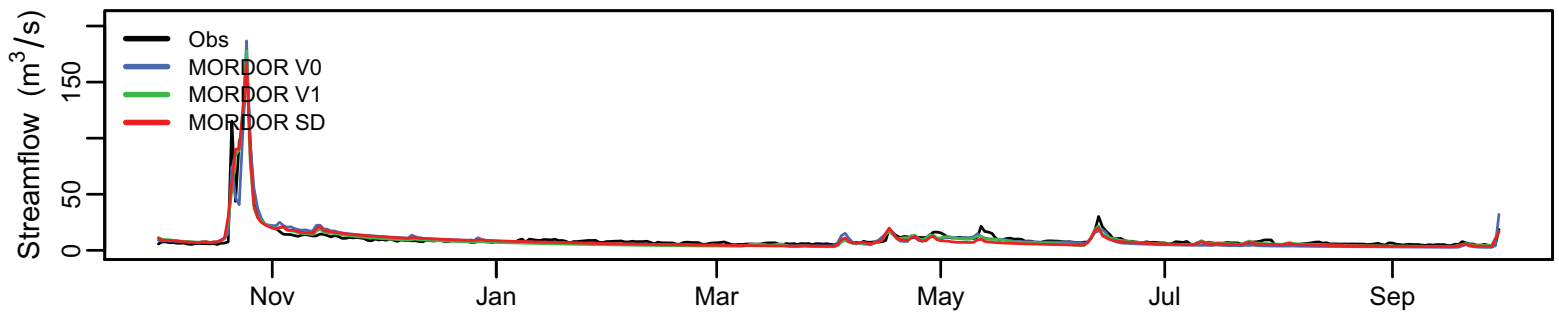

Year 2001

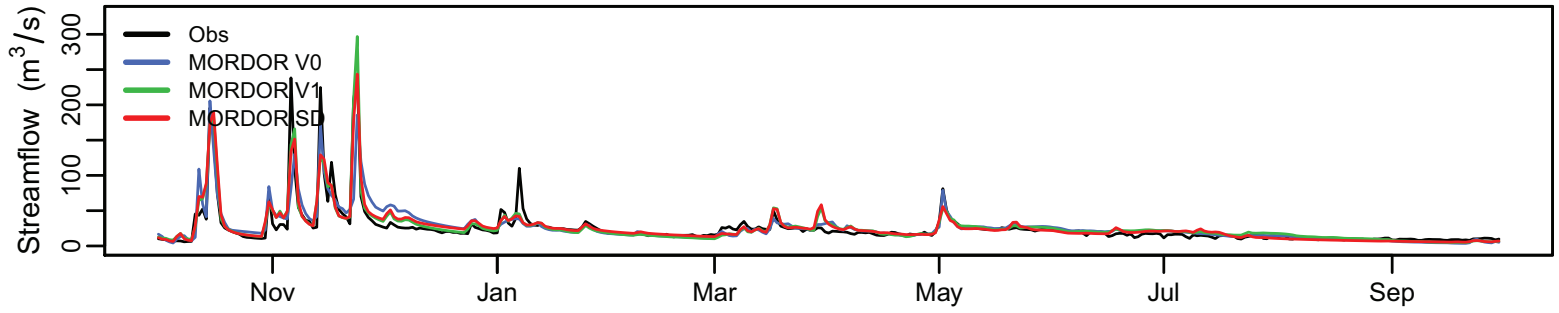

Year 2002

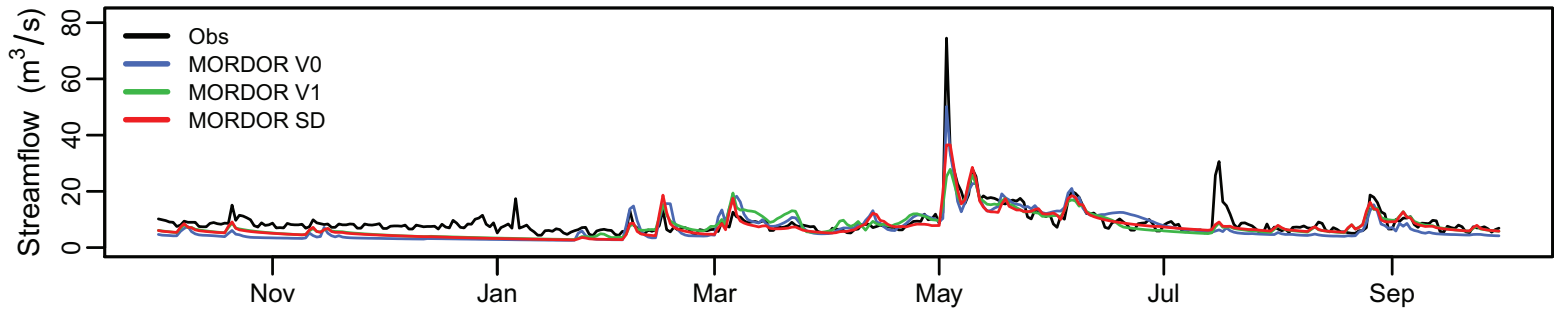

Year 2003

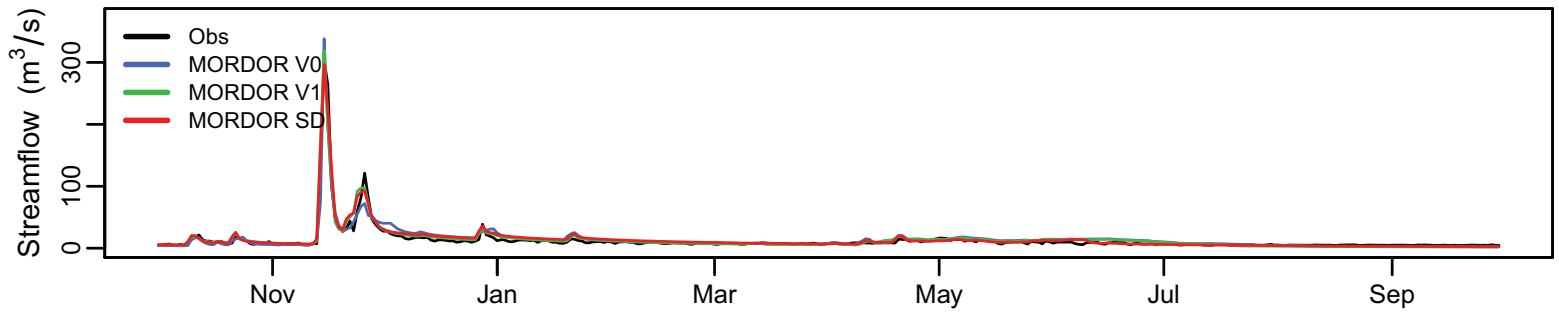

Year 2004

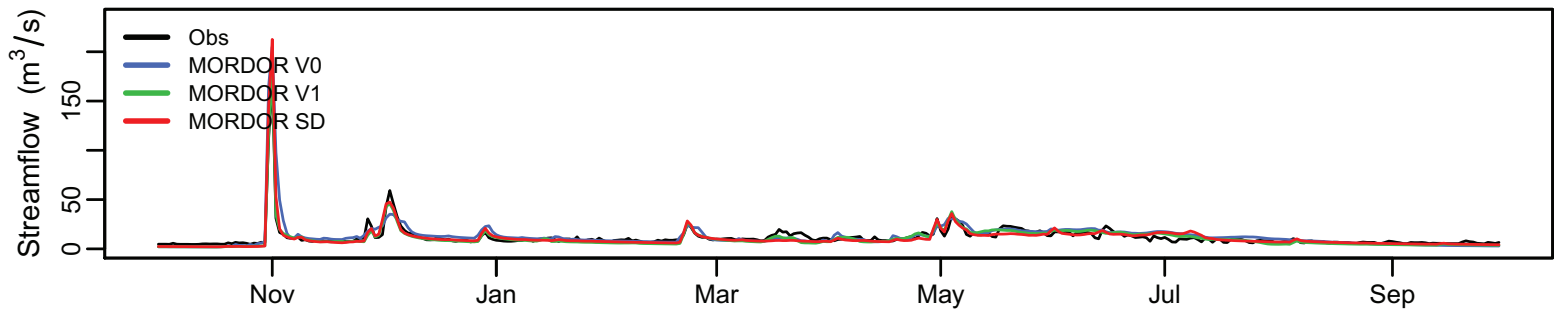

Year 2005

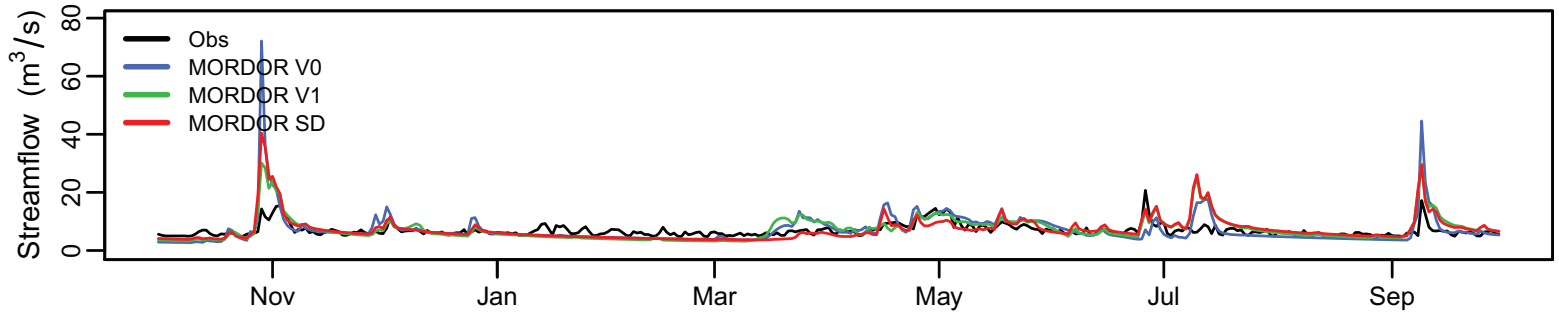

# Salat@Roquefort

Year 1994

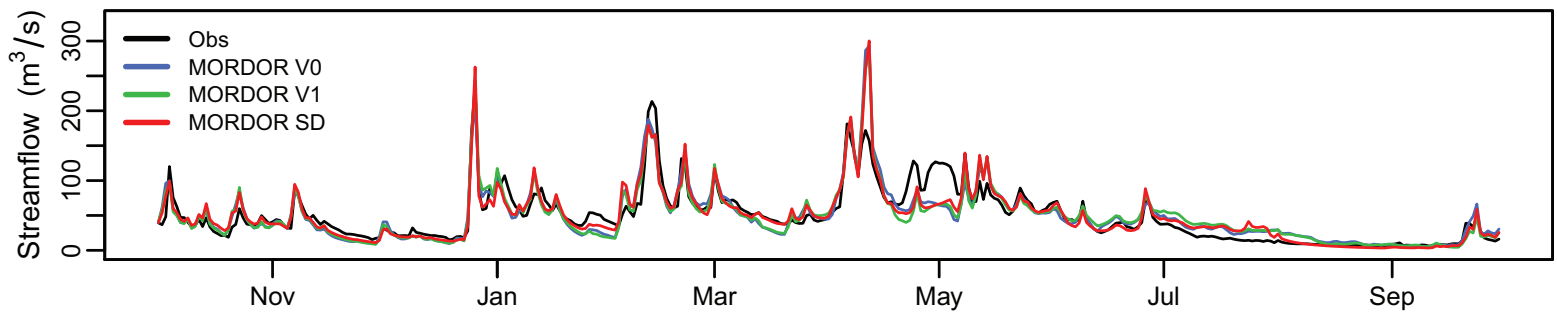

Year 1995

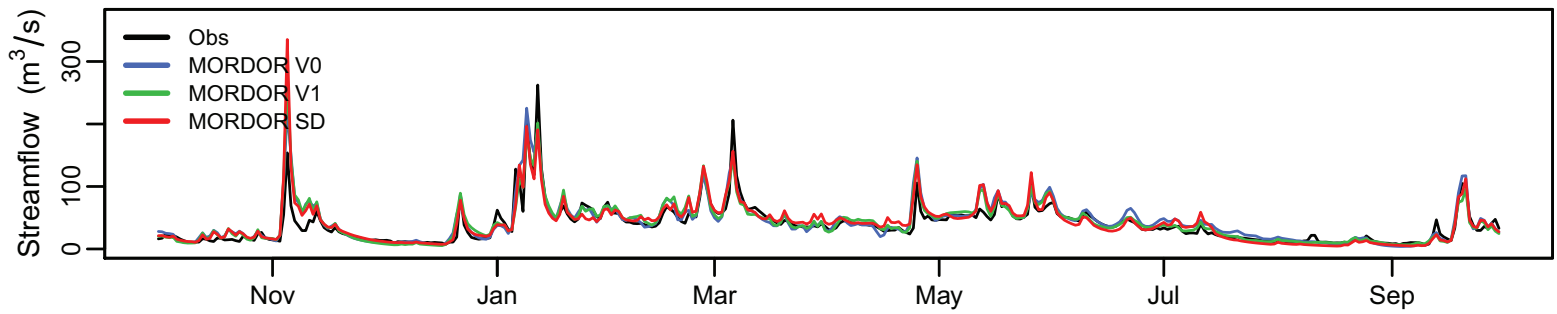

Year 1996

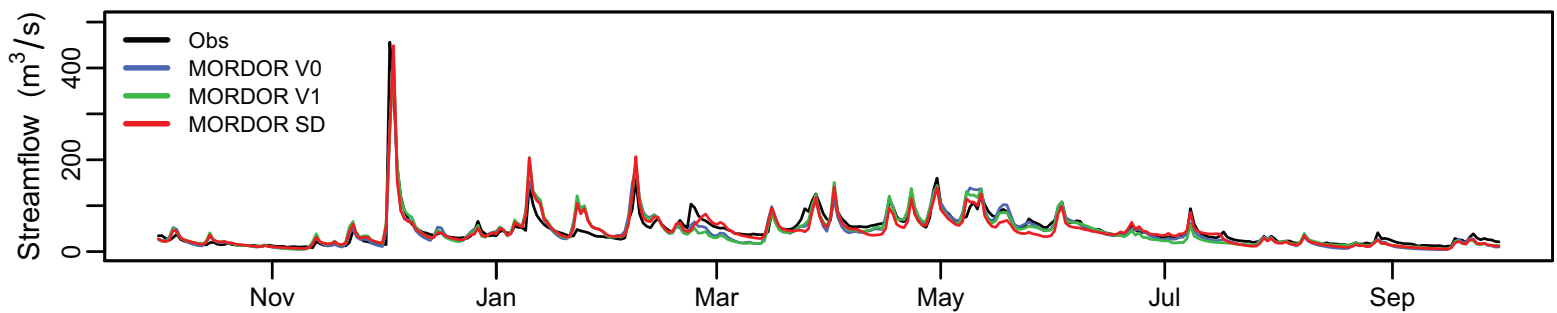

Year 1997

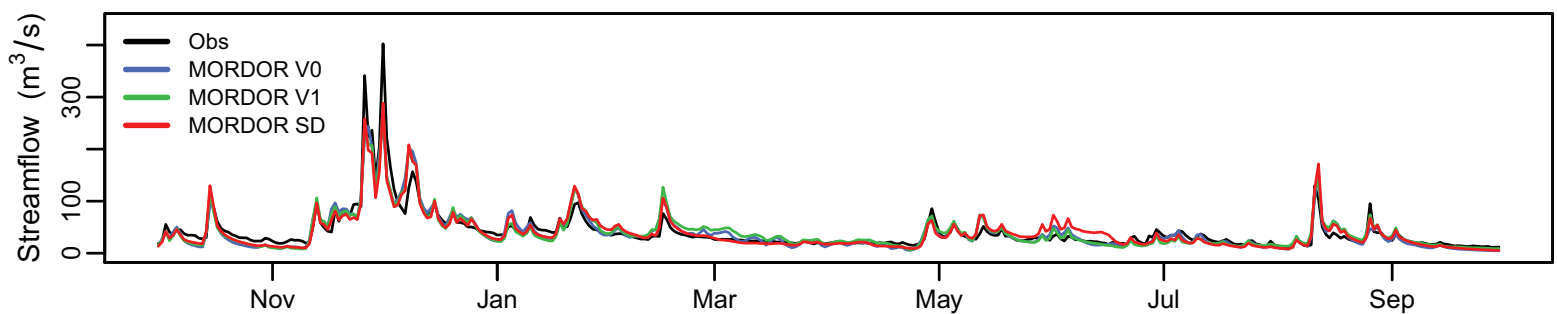

Year 1998

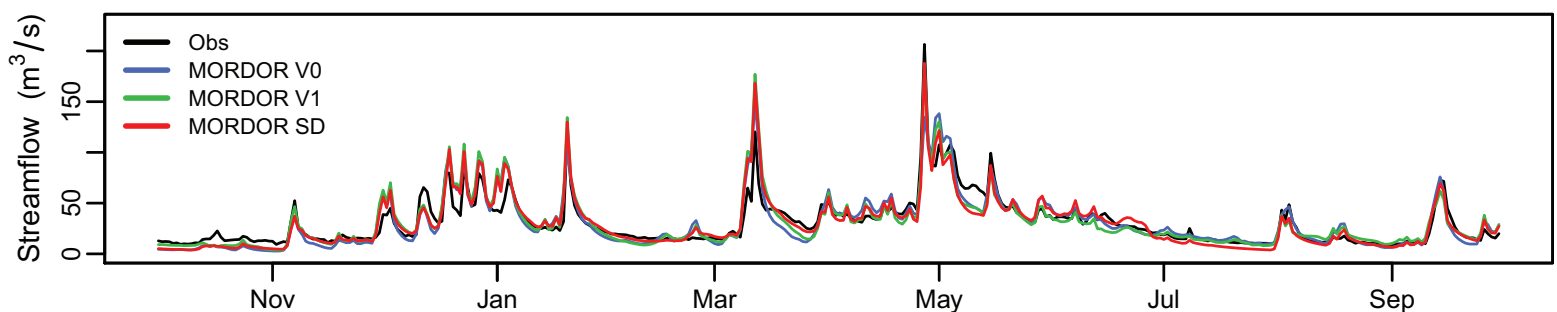

Year 1999

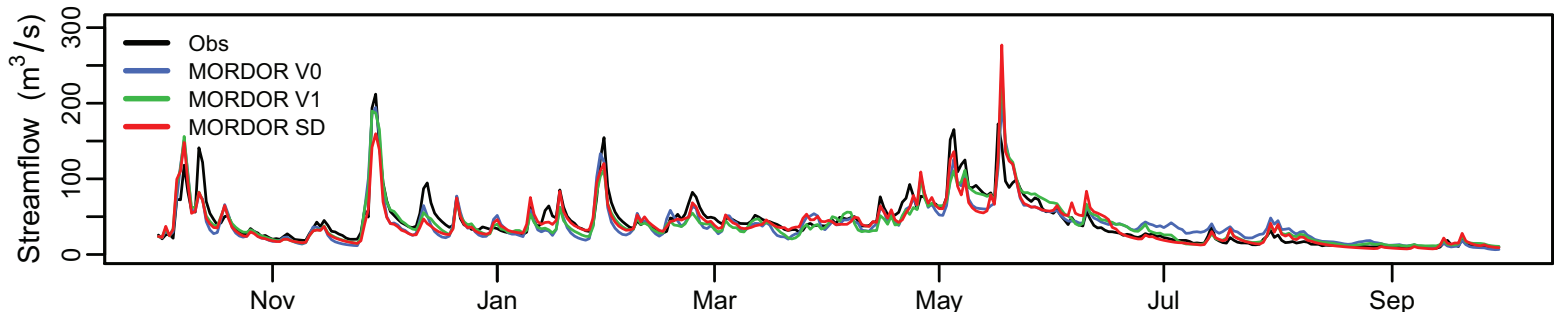



# Salat@Roquefort

Year 2000

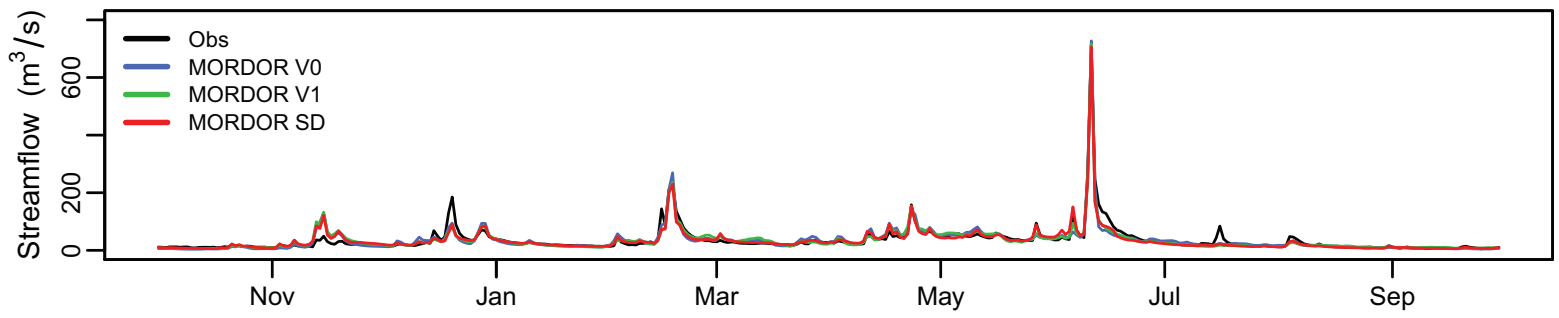

Year 2001

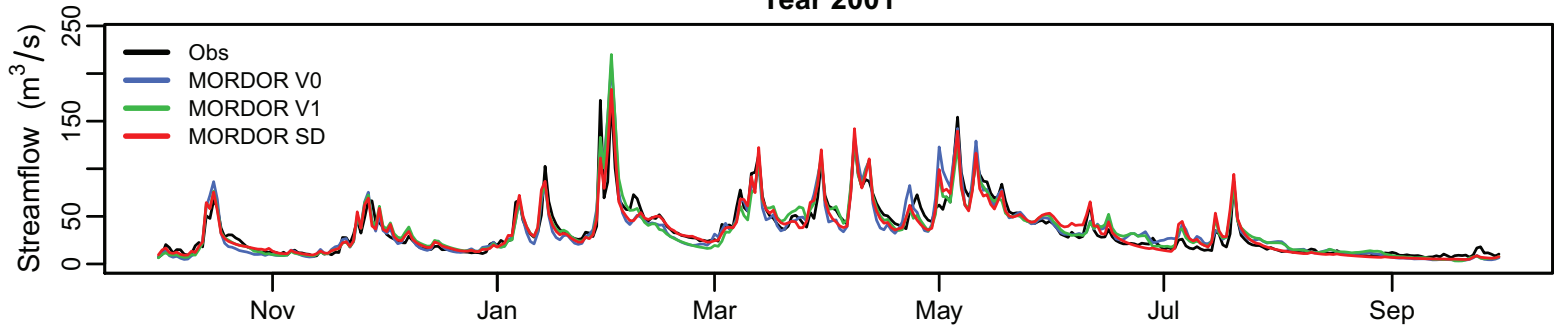

Year 2002

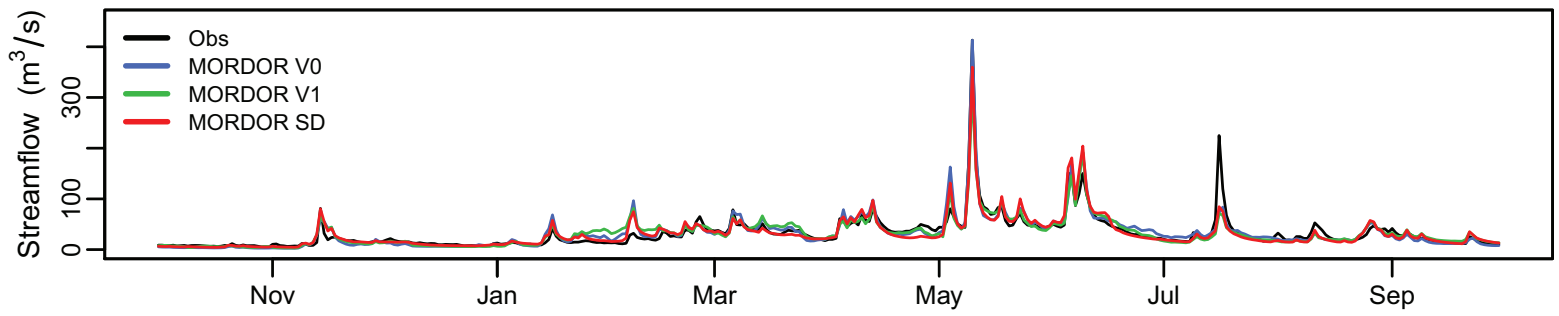

Year 2003

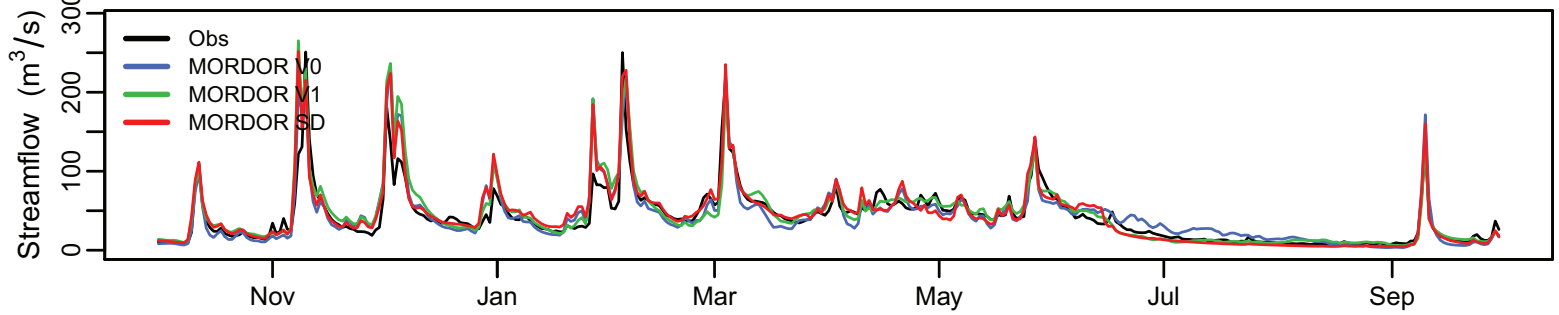

# Sioule@Fades

Year 1957

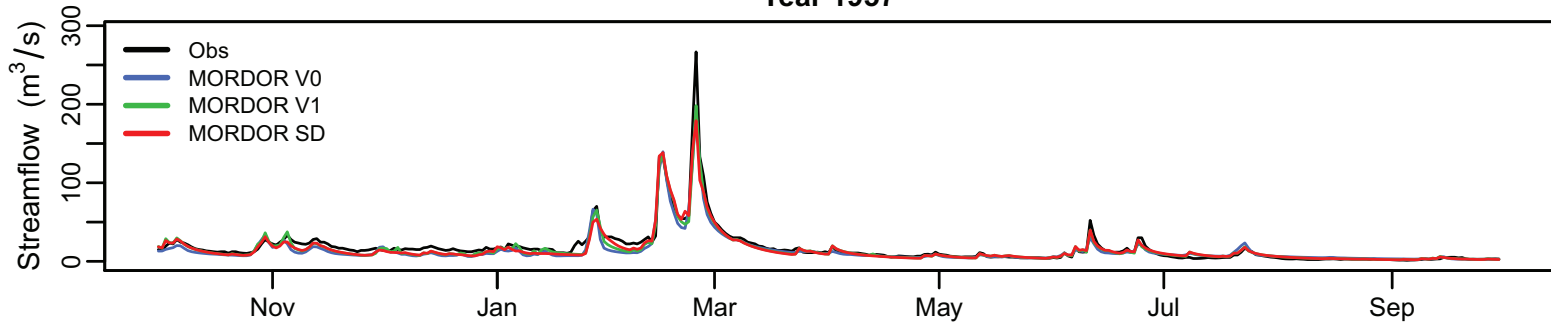

Year 1958

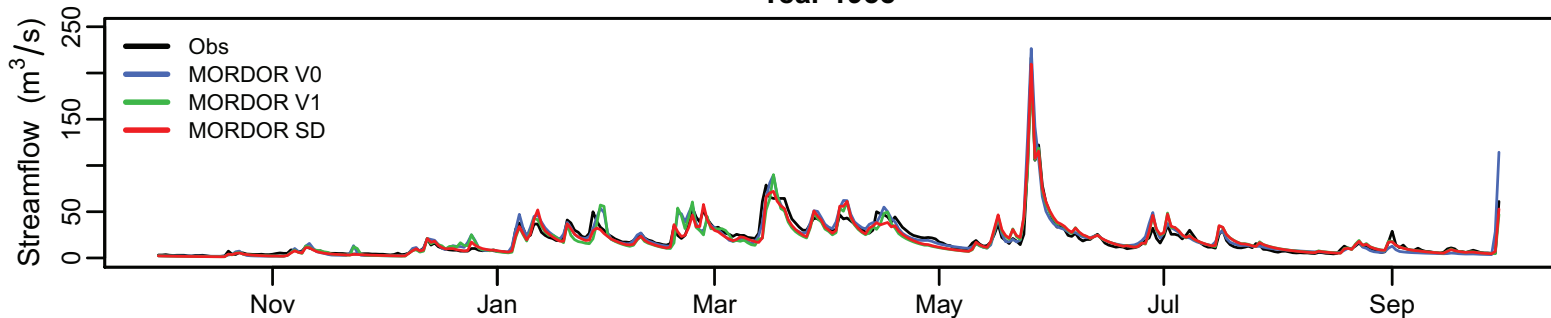

Year 1959

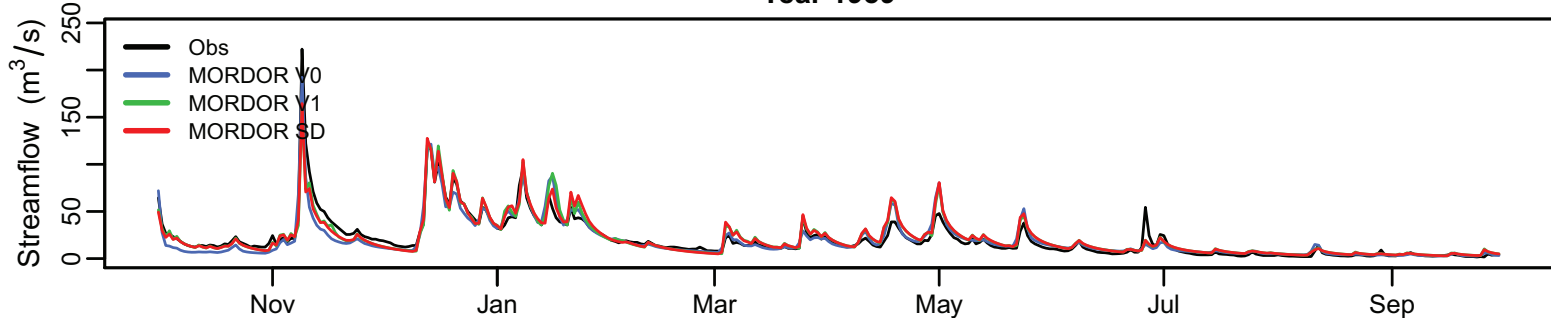

Year 1960

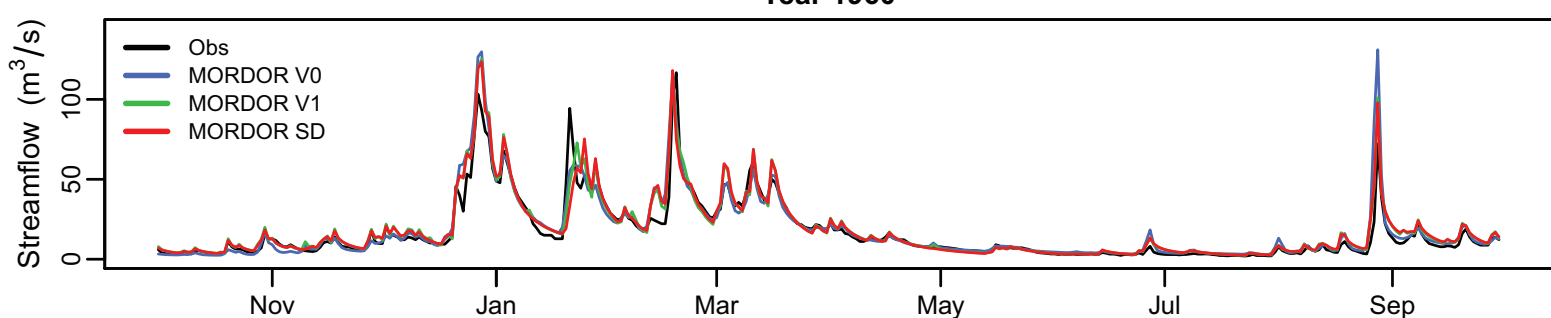

Year 1961

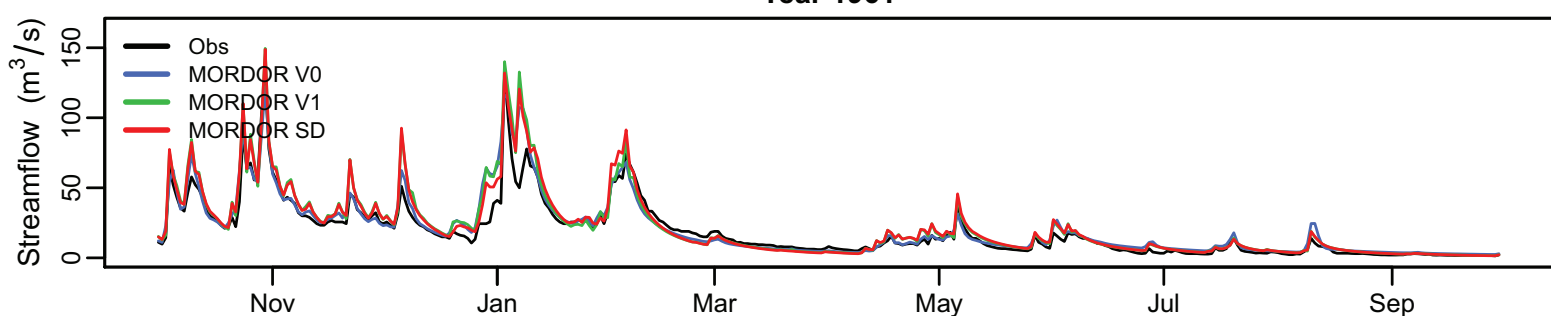

Year 1962

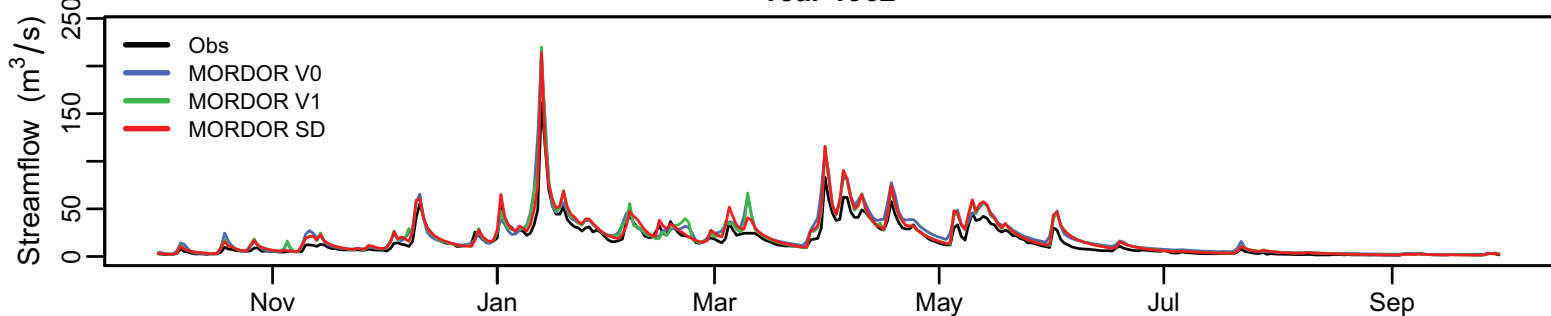

# Sioule@Fades

Year 1963

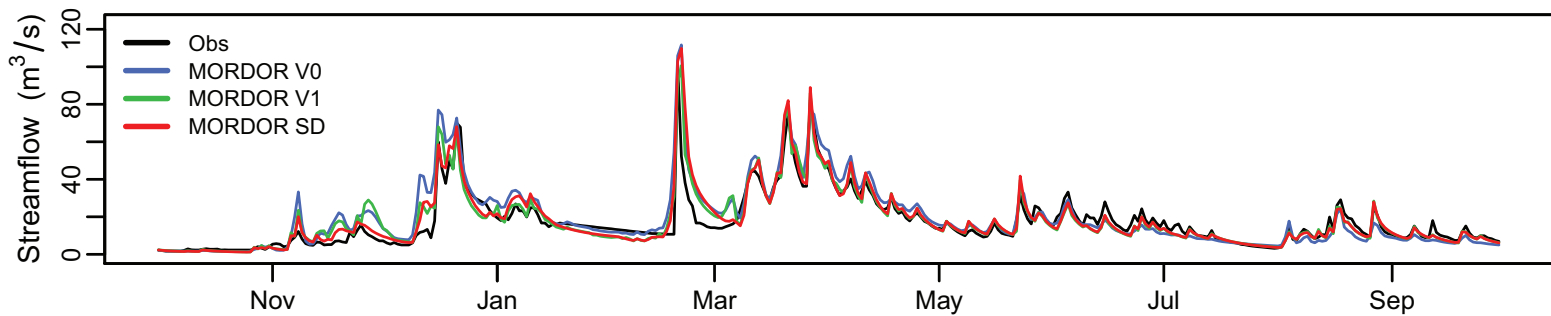

Year 1964

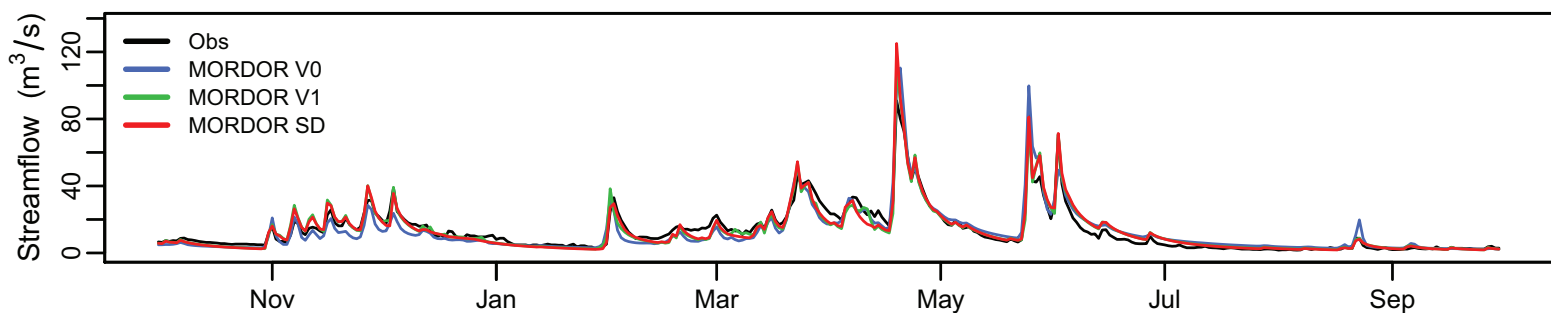

Year 1965

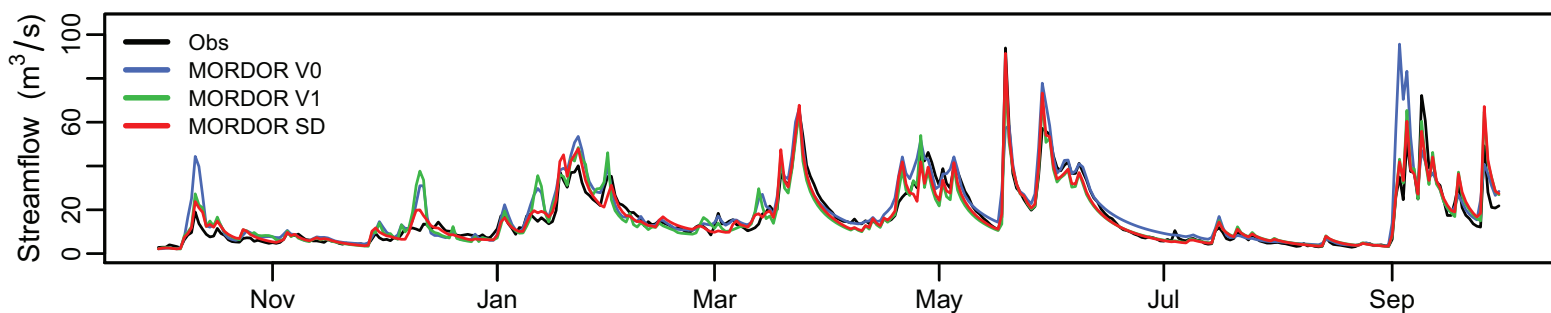

Year 1966

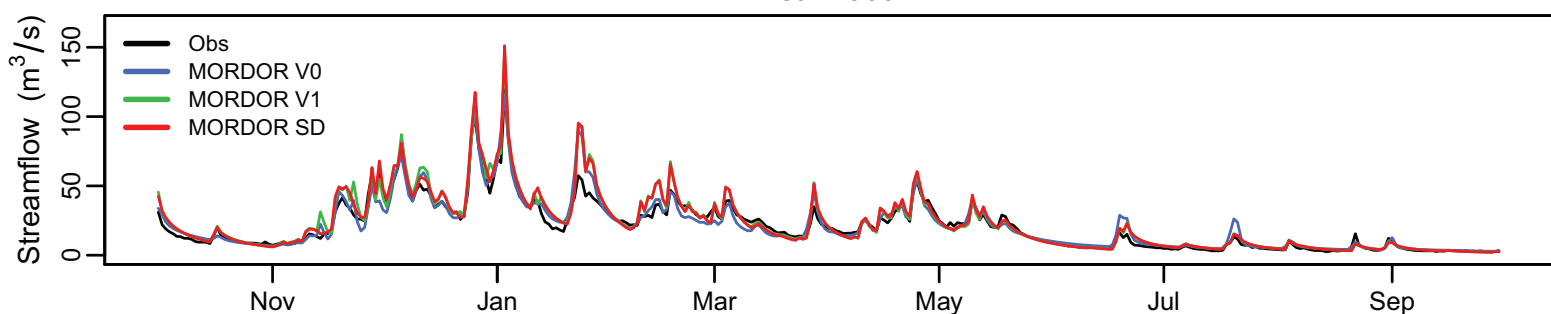

Year 1967

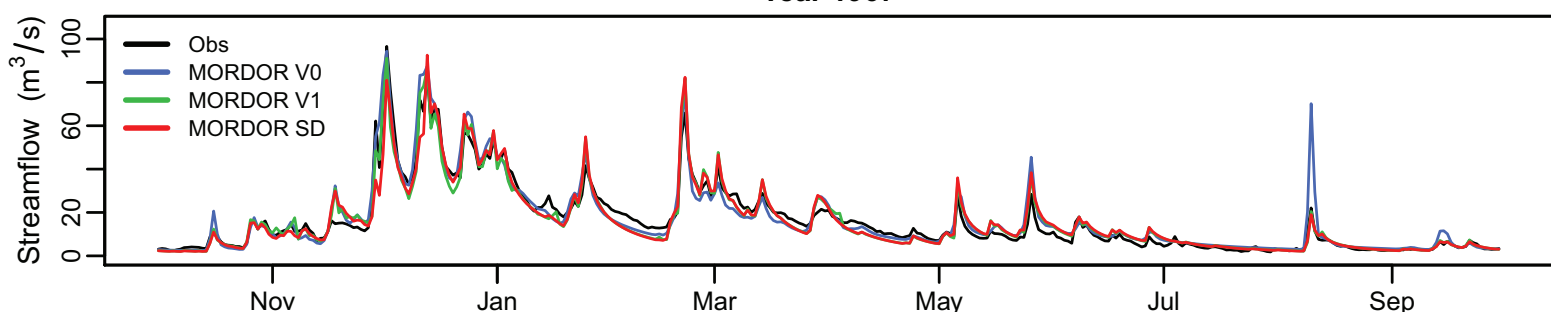

Year 1968

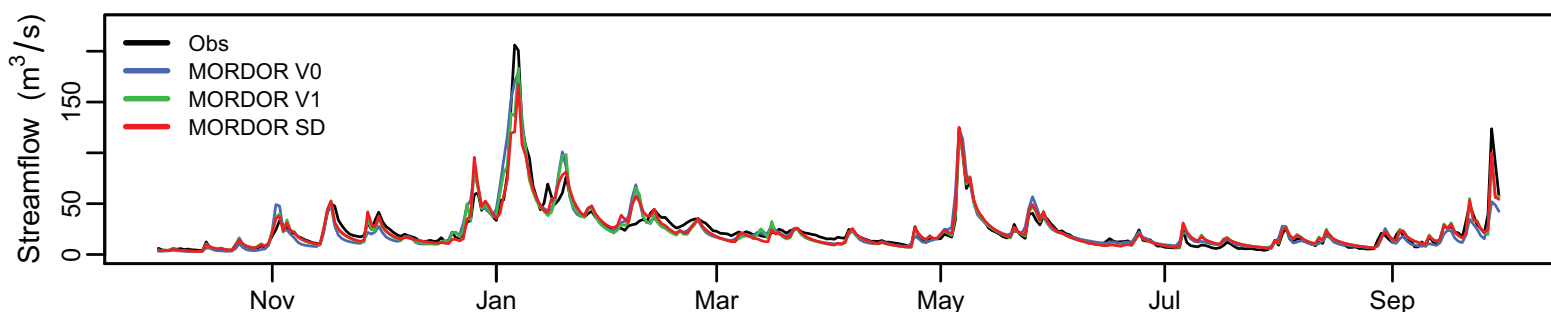

# Sioule@Fades

Year 1969

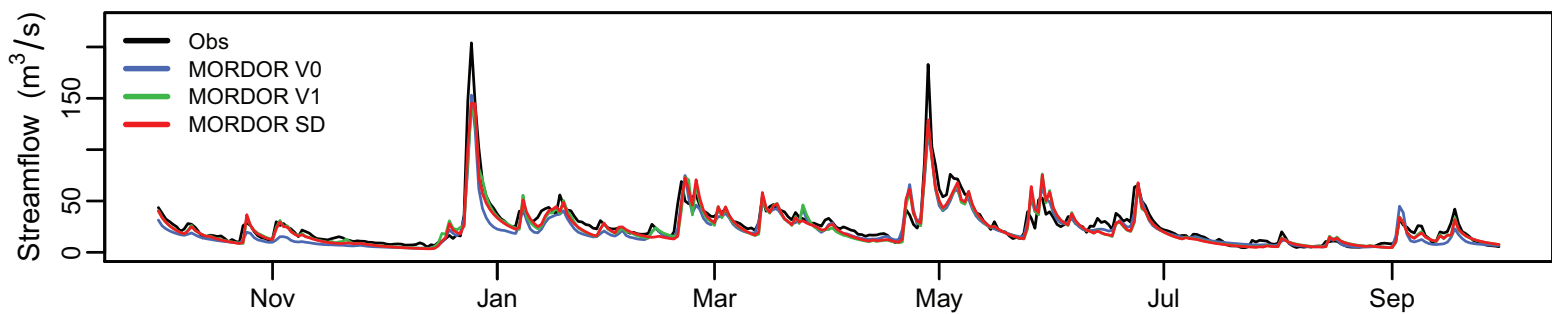

Year 1970

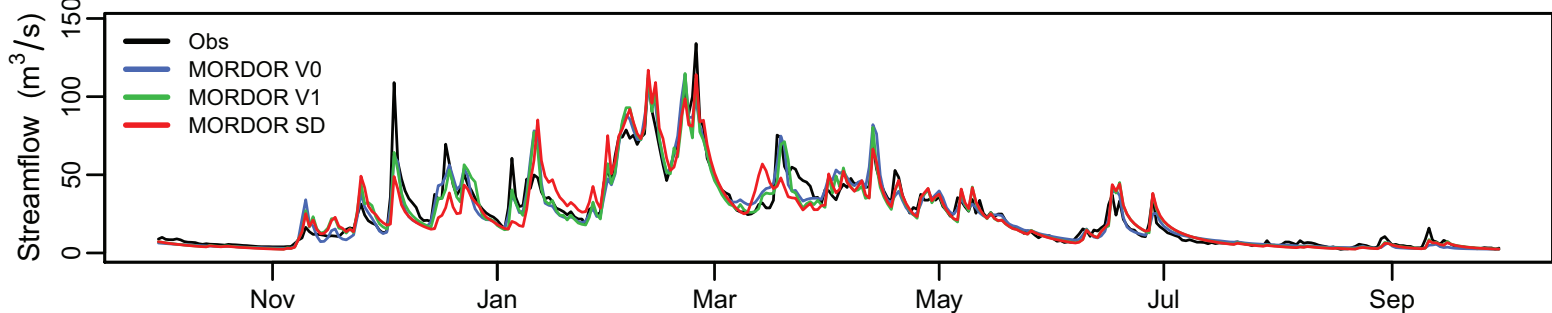

Year 1971

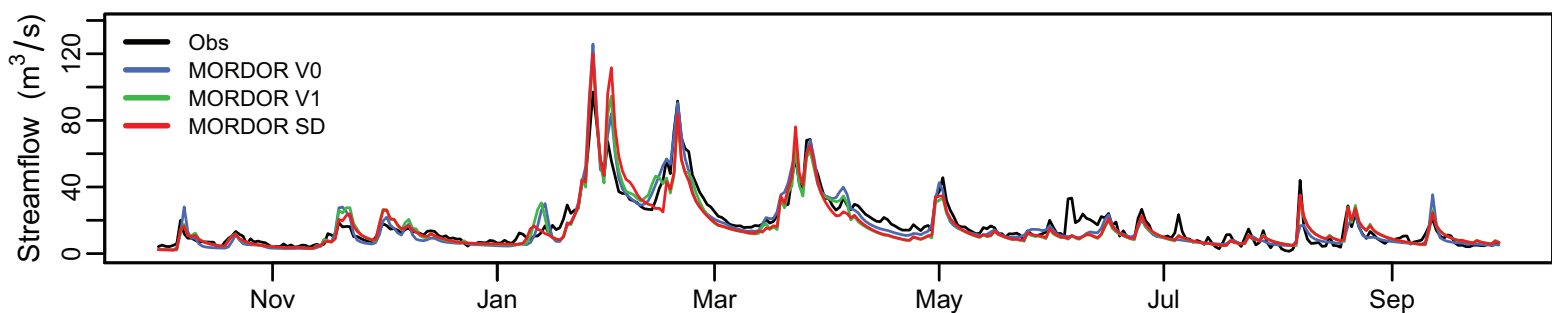

Year 1972

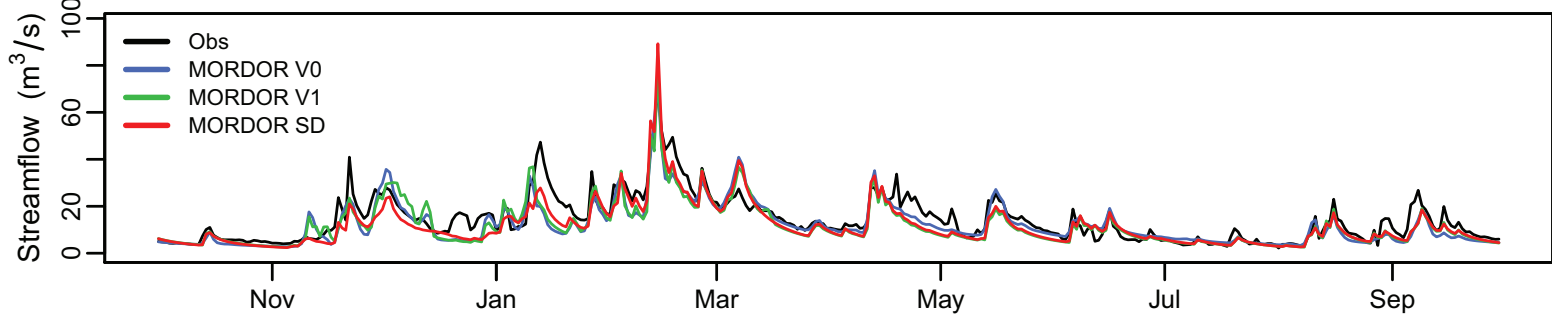

Year 1973

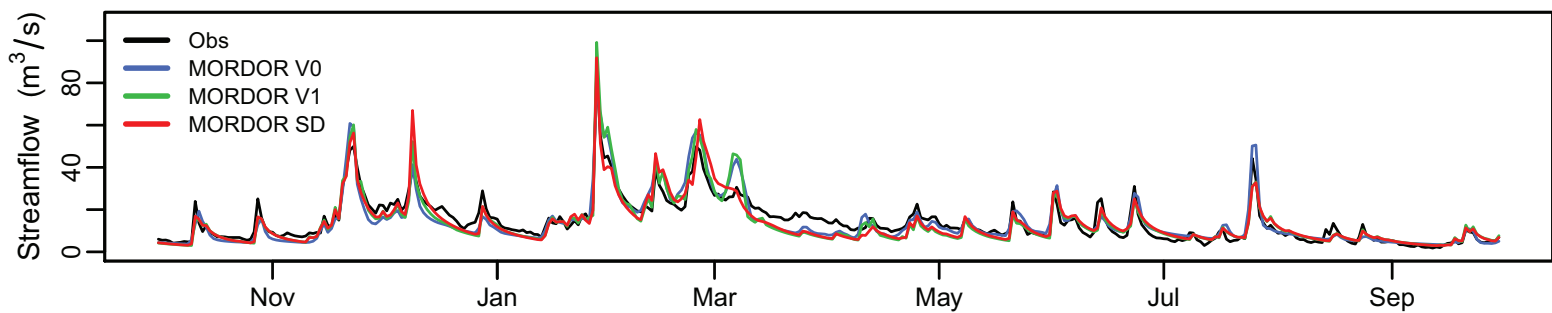

Year 1974

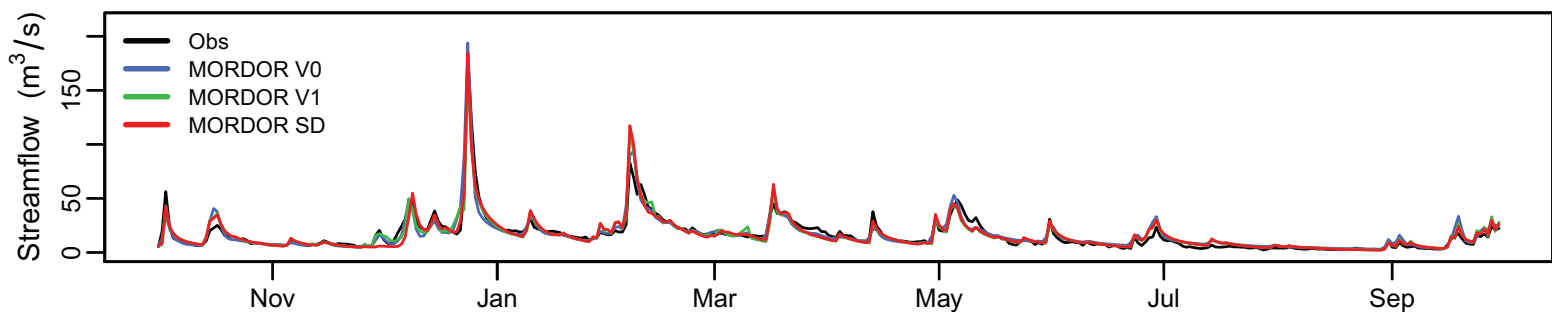

# Sioule@Fades

Year 1975

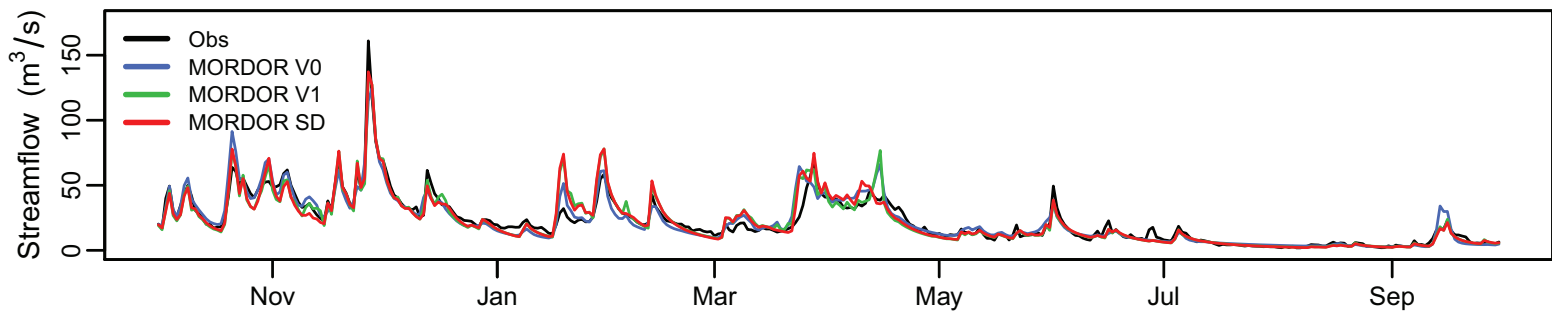

Year 1976

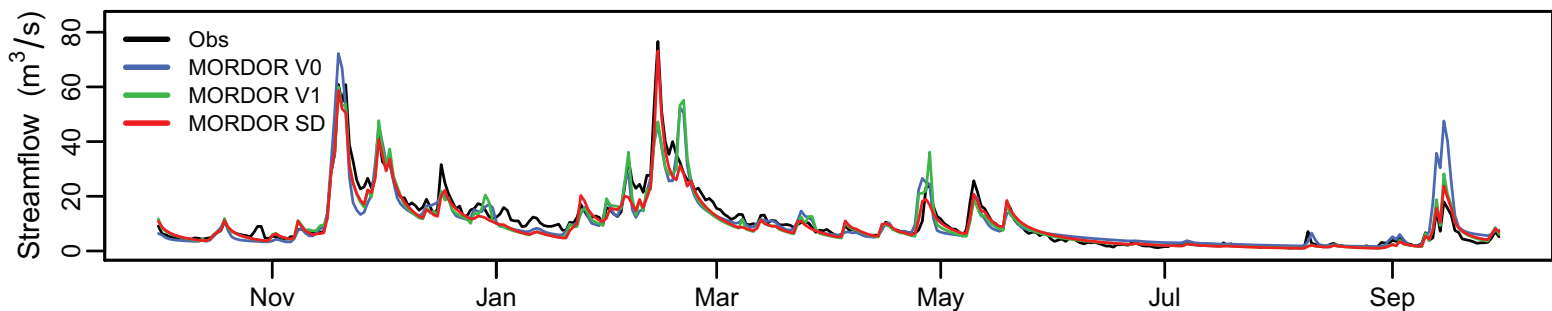

Year 1977

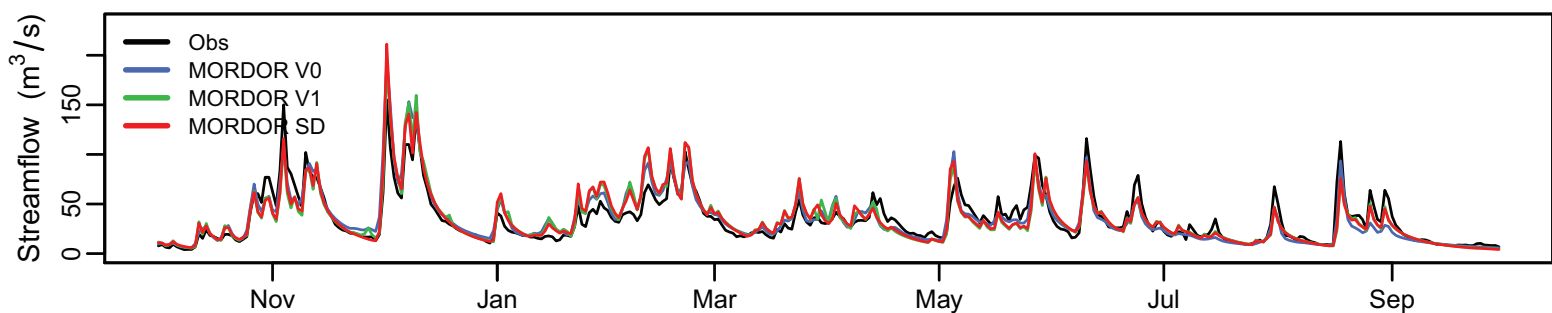

Year 1978

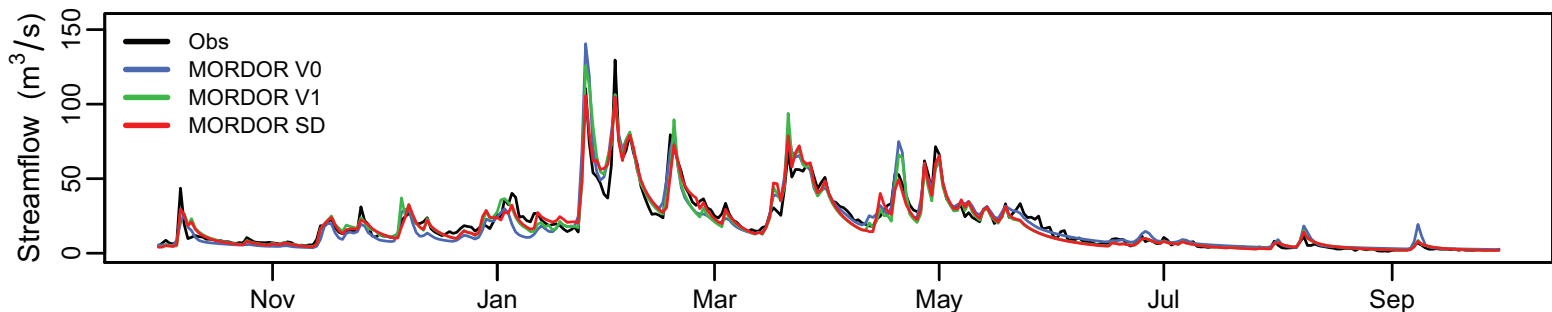

Year 1979

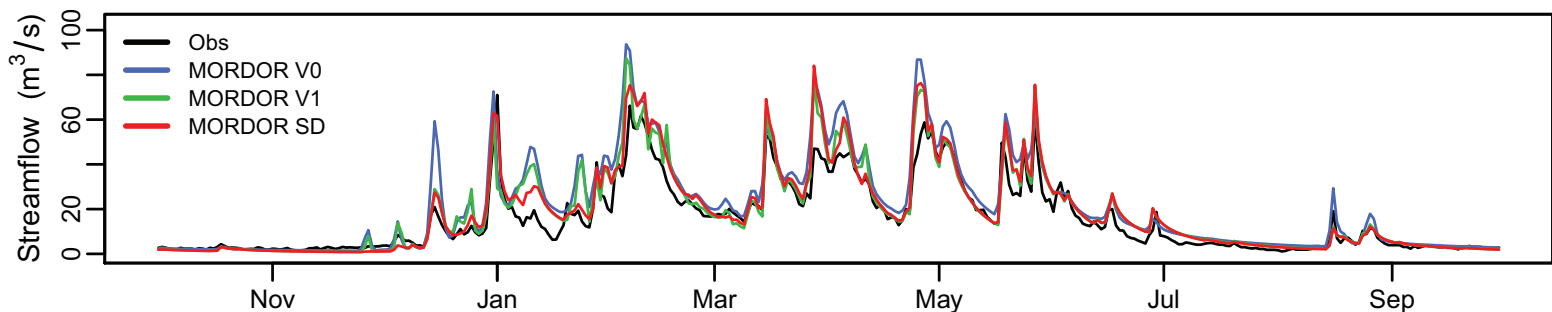

Year 1980

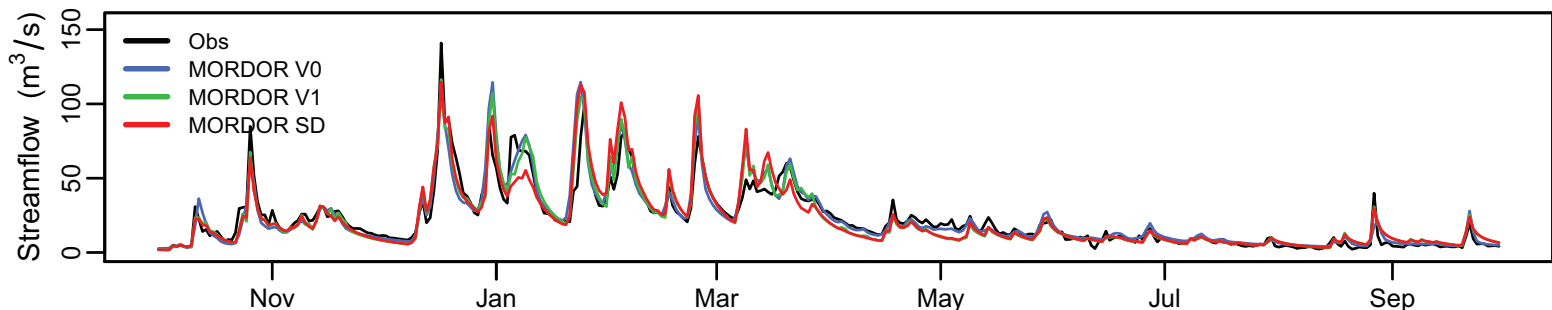

# Sioule@Fades

Year 1981

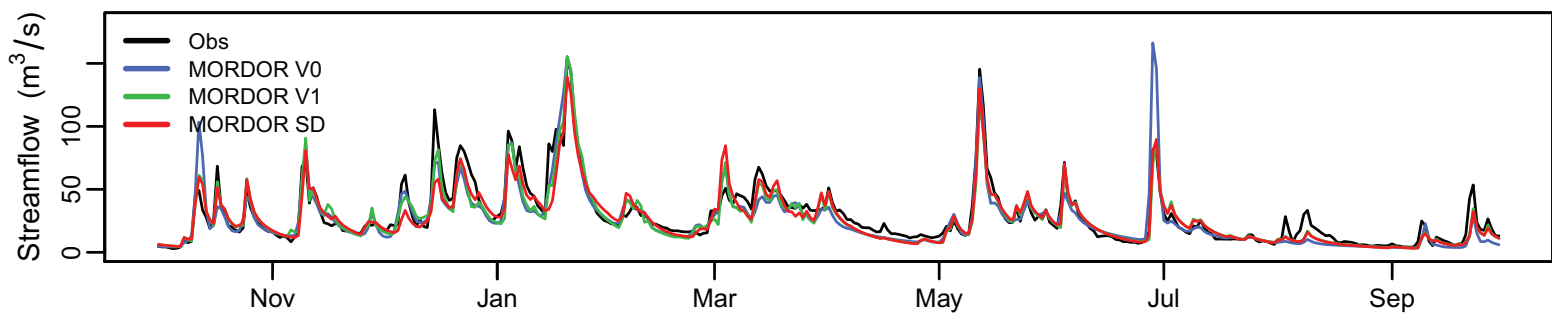

Year 1982

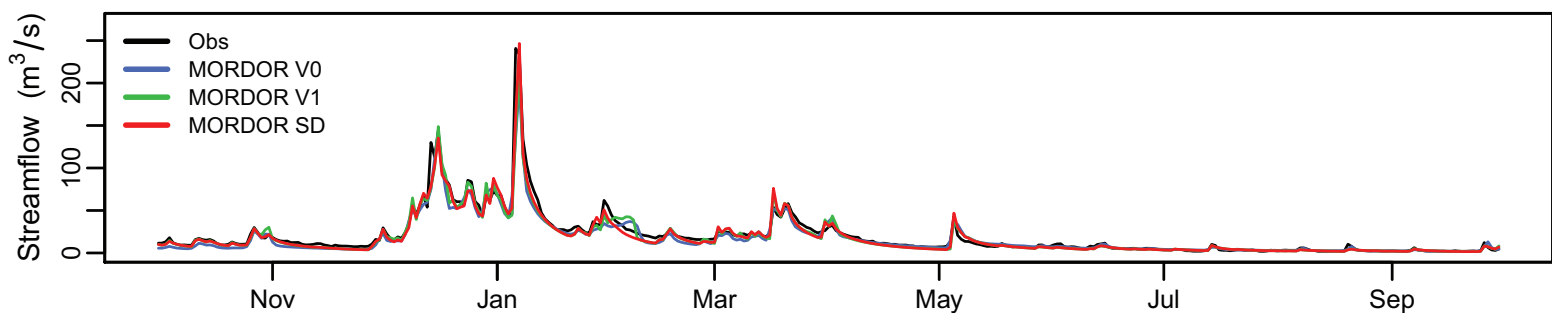

Year 1983

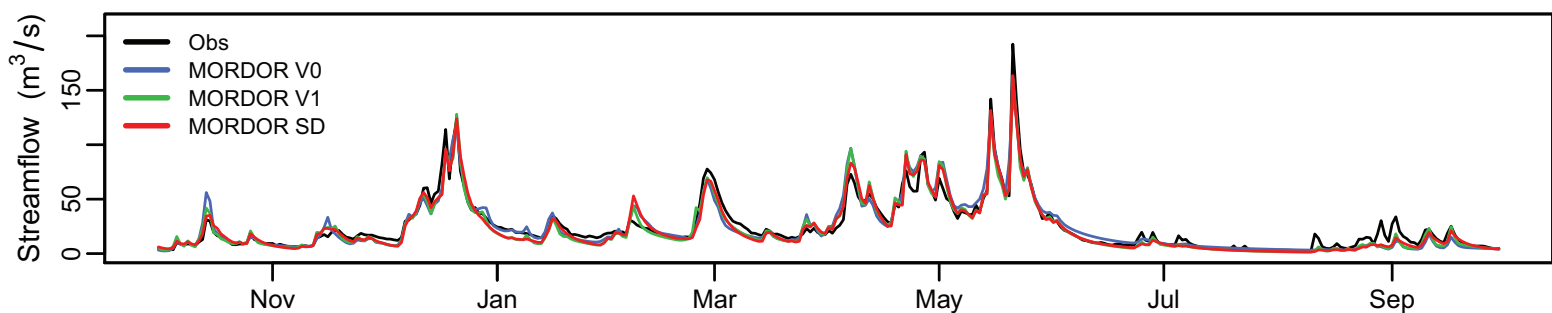

Year 1984

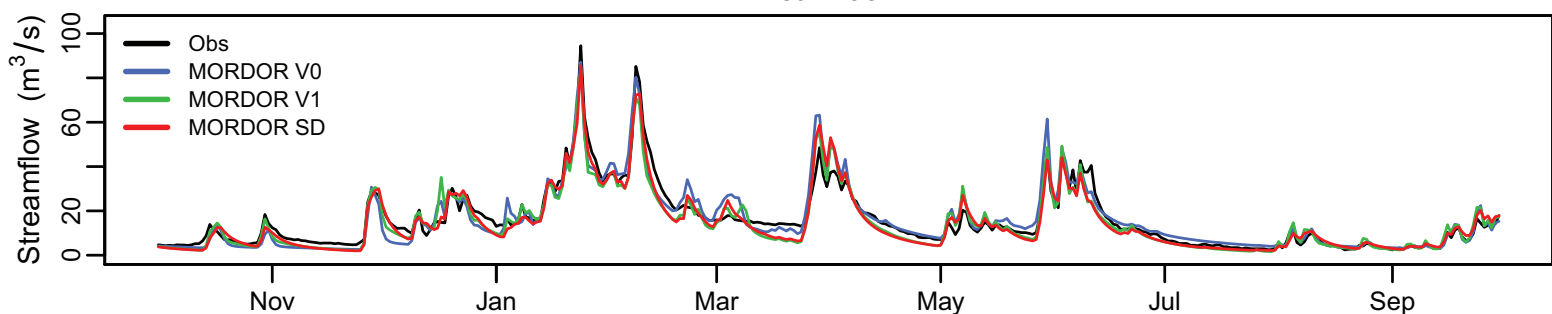

Year 1985

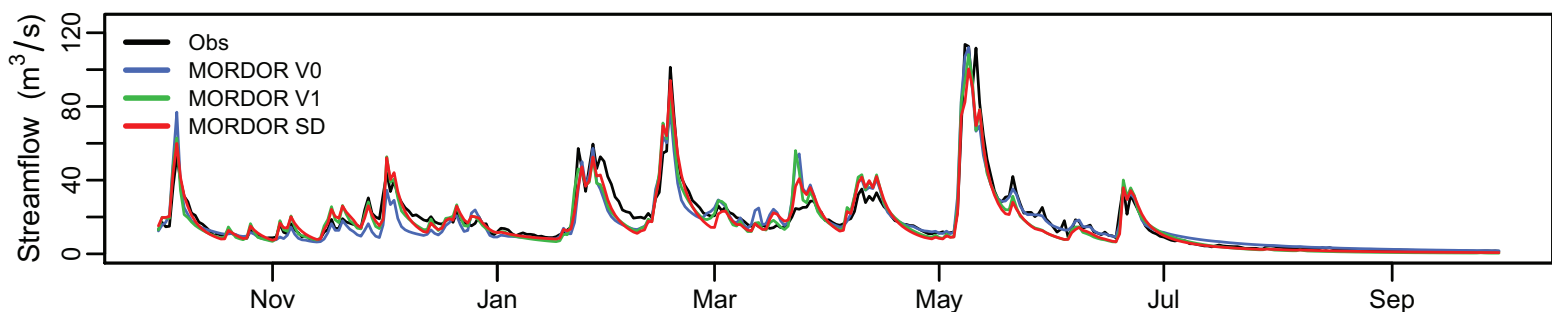

Year 1986

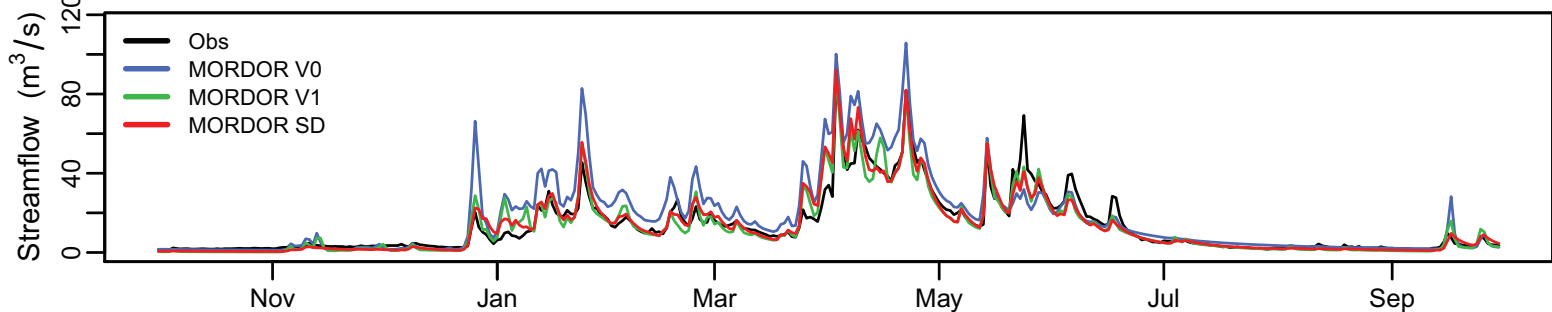

# Sioule@Fades

Year 1987

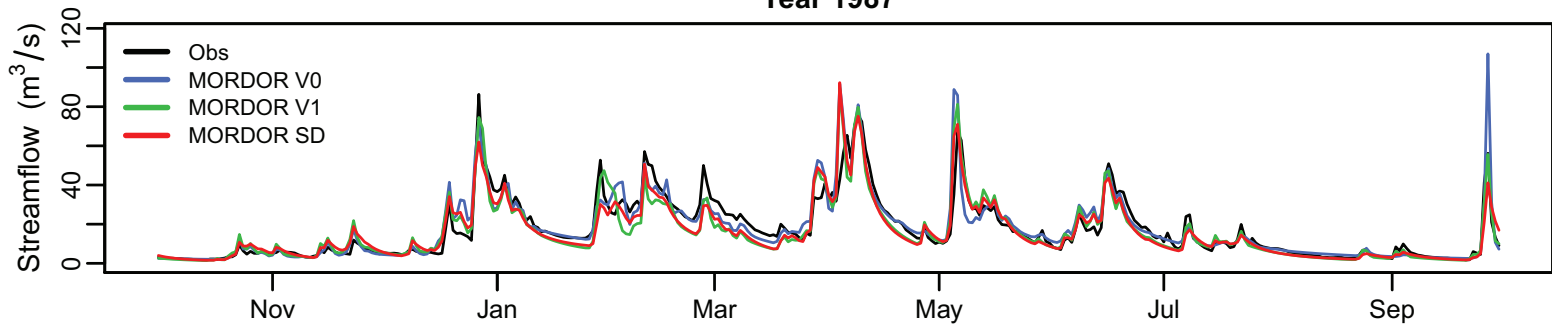

Year 1988

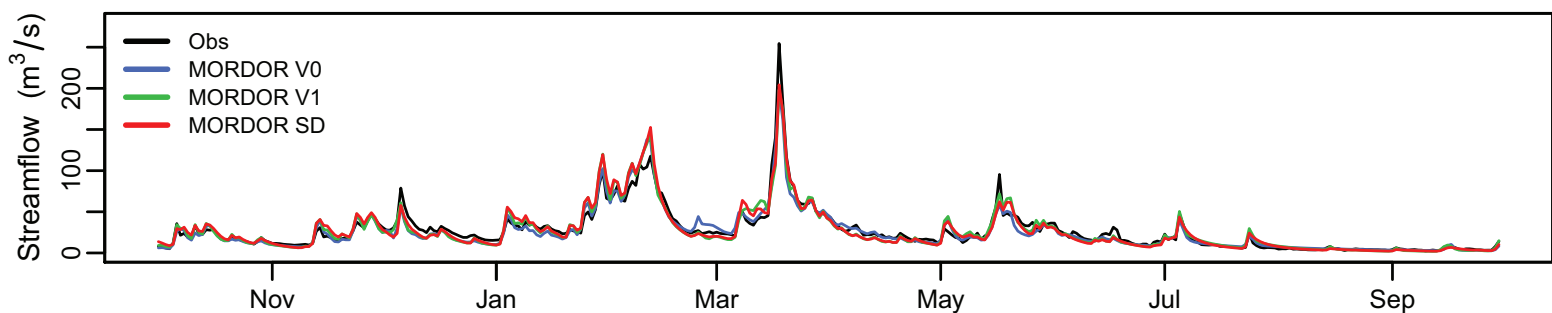

Year 1989

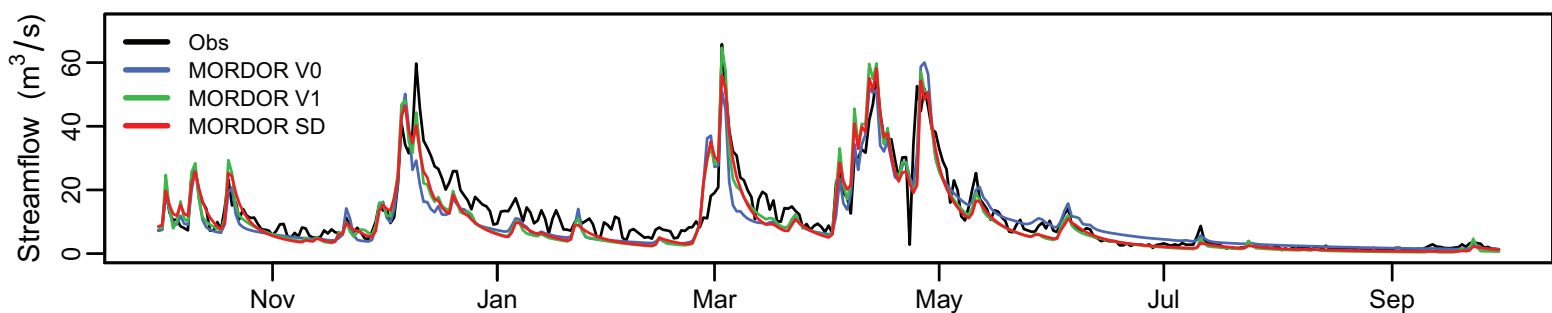

Year 1990

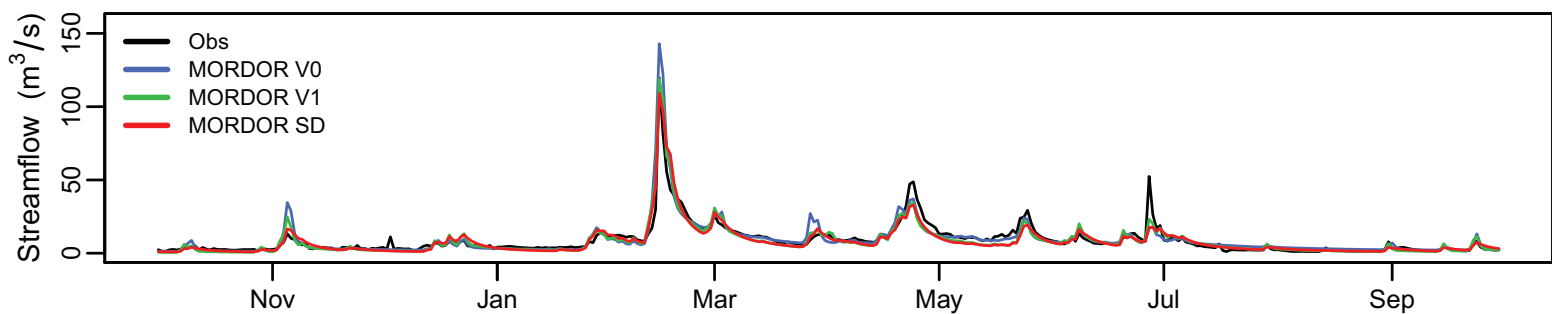

Year 1991

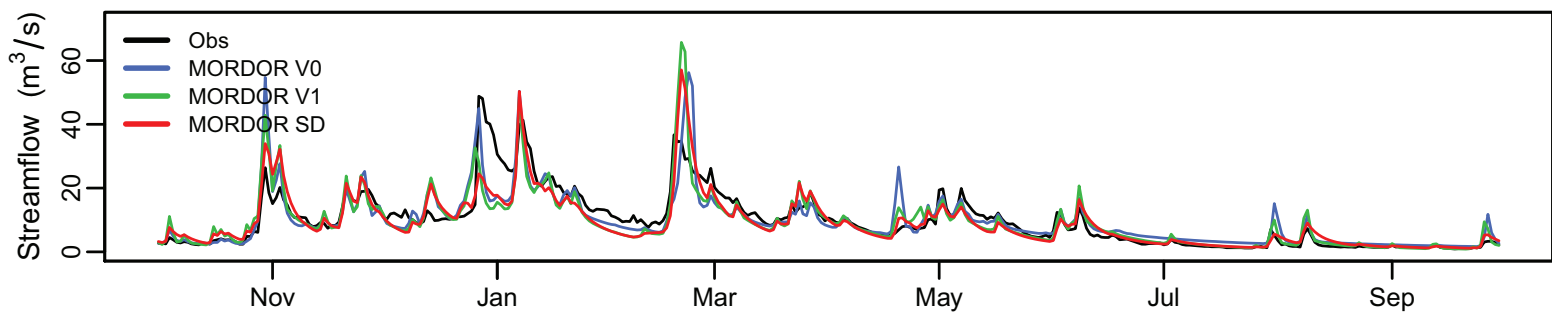

Year 1992

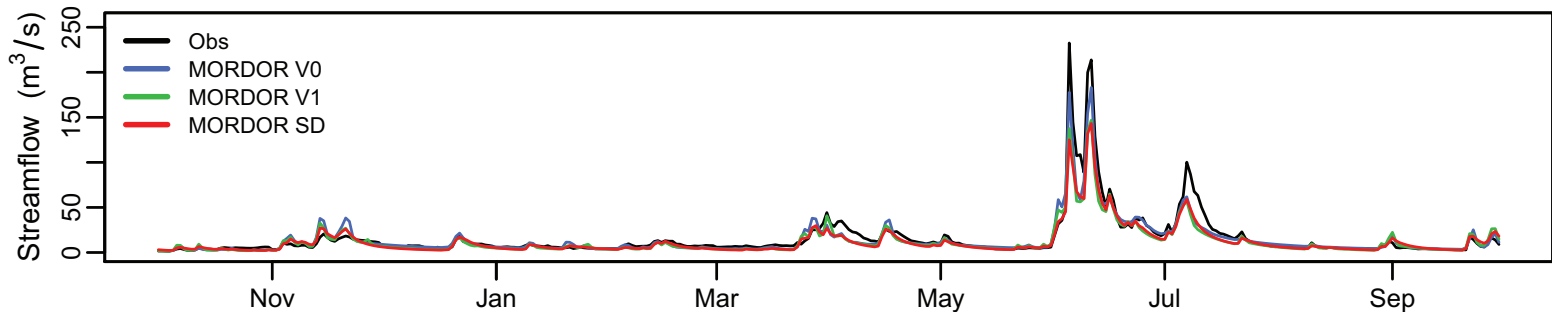

# Sioule@Fades

Year 1993

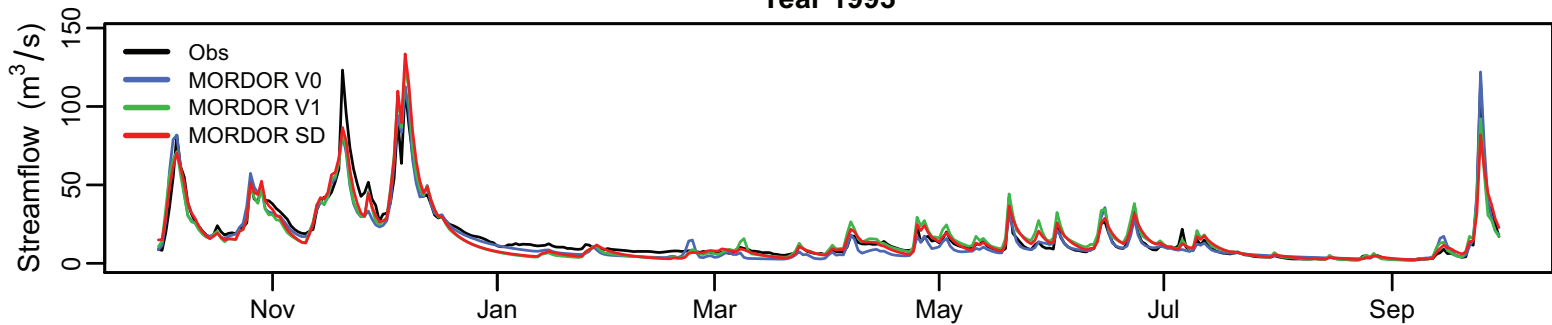

Year 1994

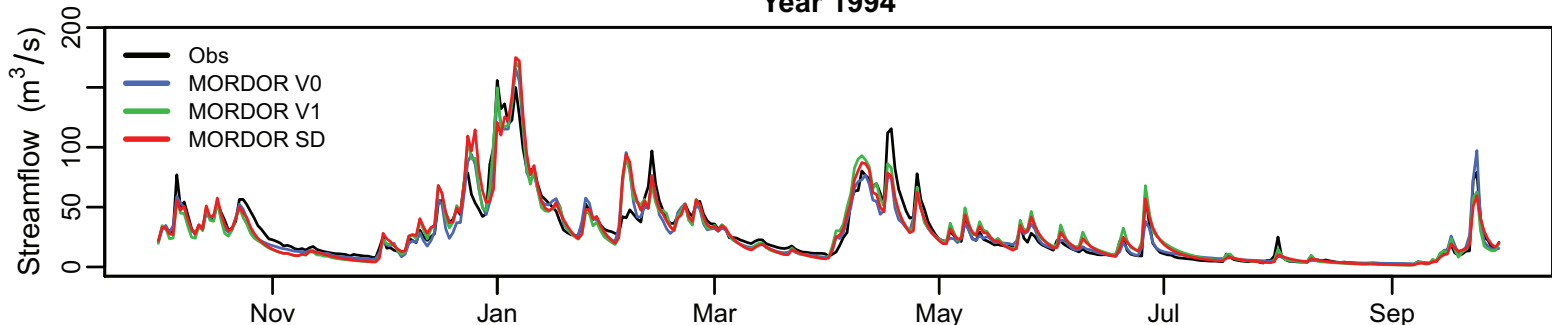

Year 1995

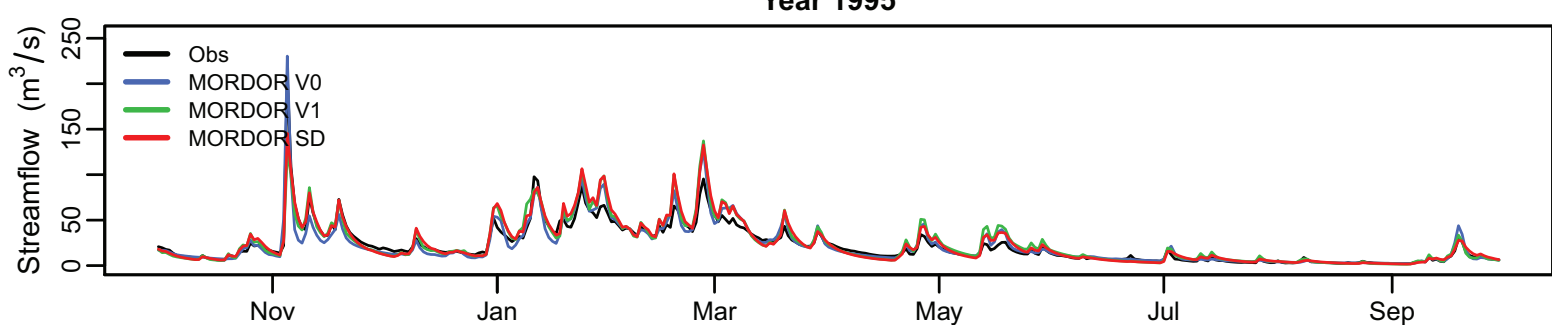

Year 1996

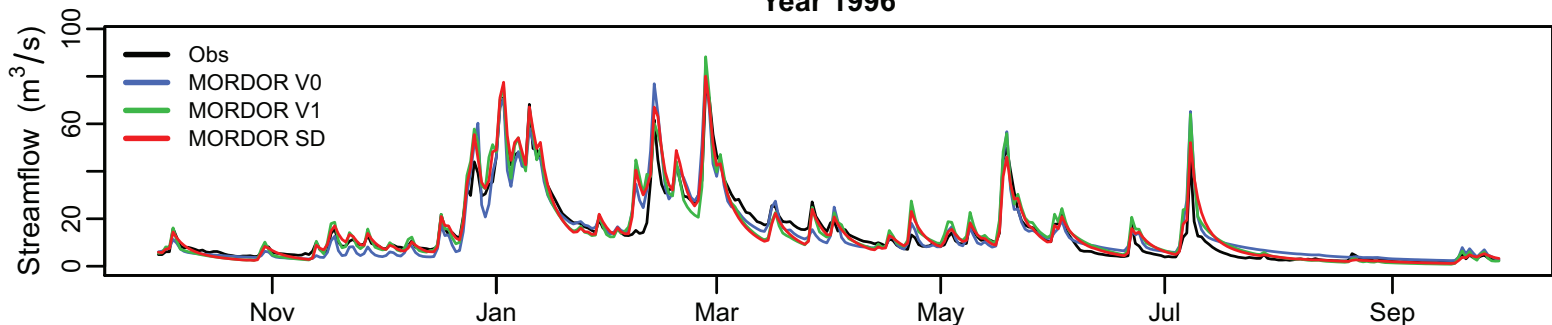

Year 1997

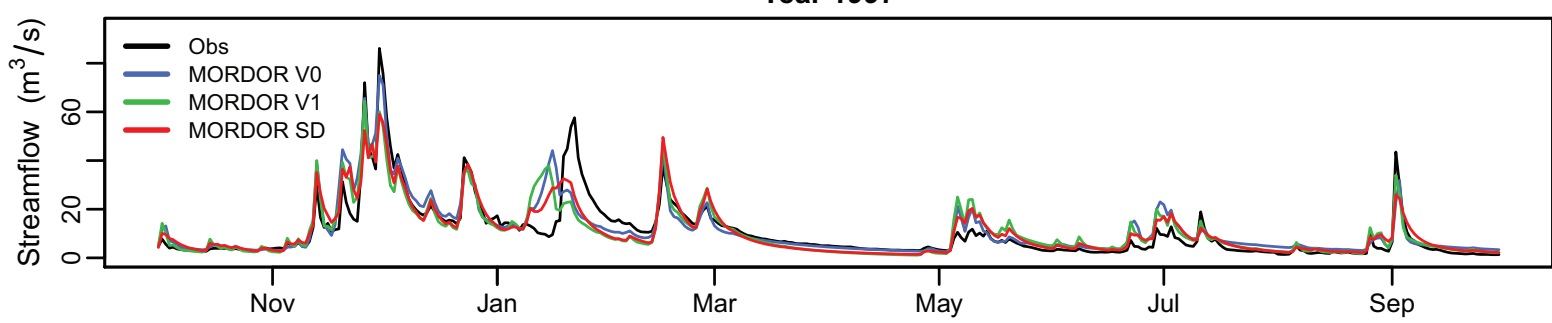

Year 1998

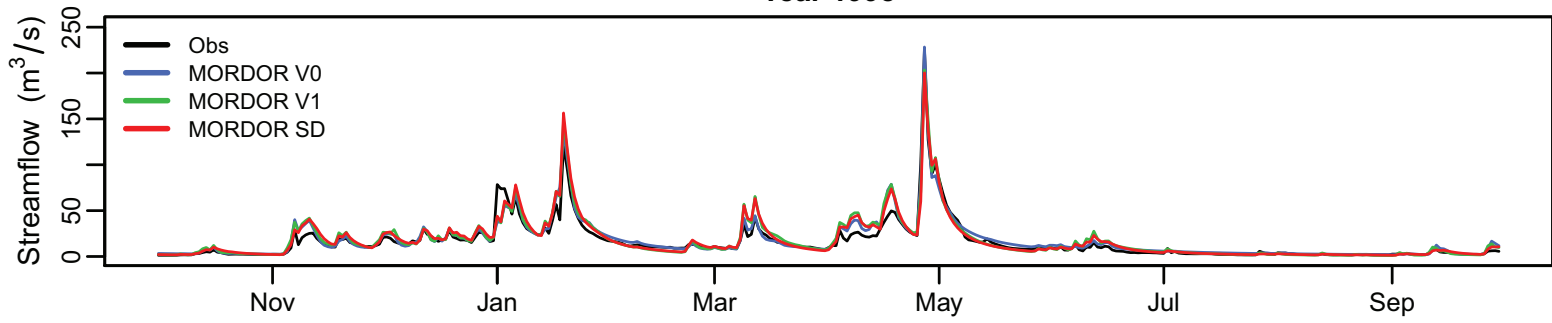



# Sioule@Fades

Year 1999

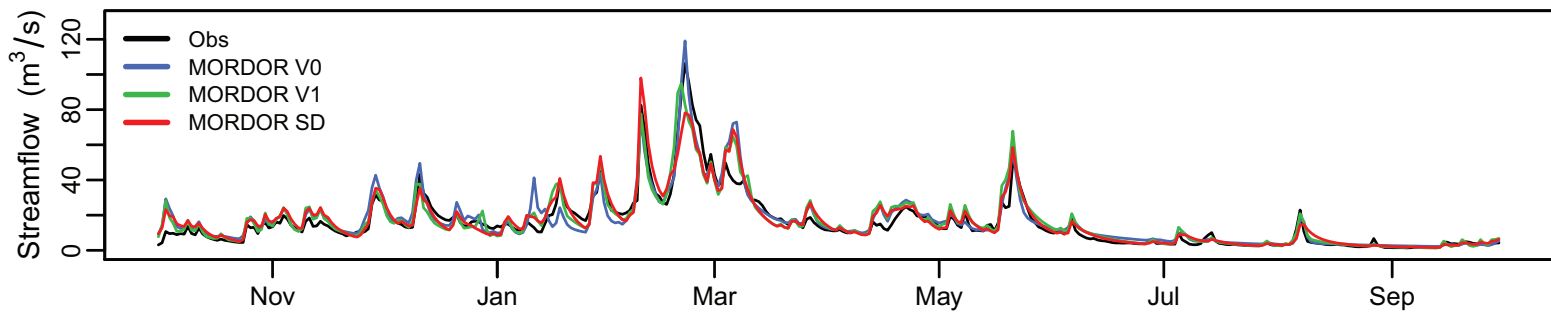

Year 2000

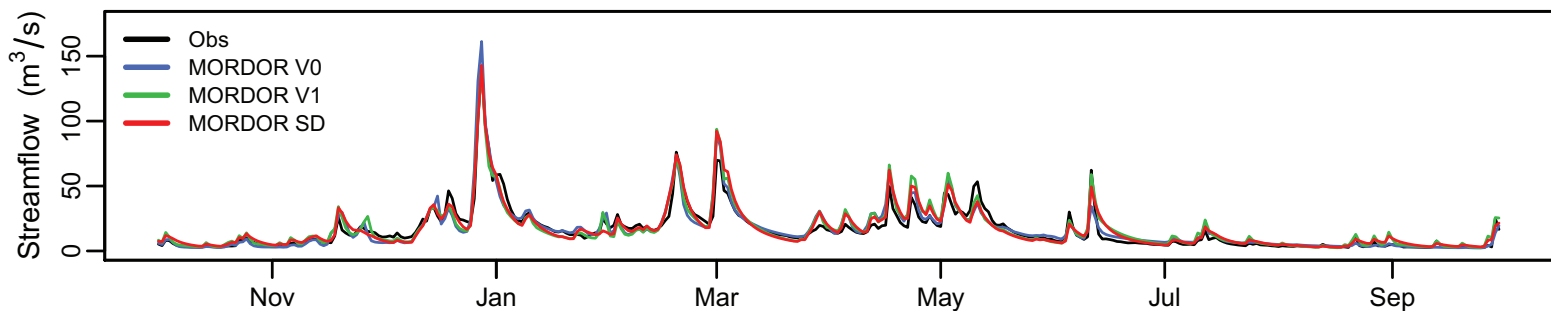

Year 2001

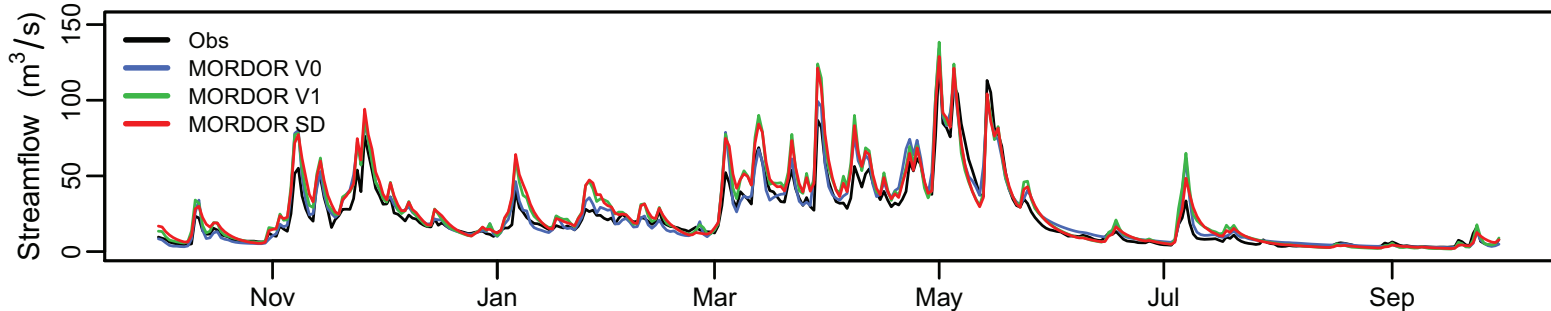

Year 2002

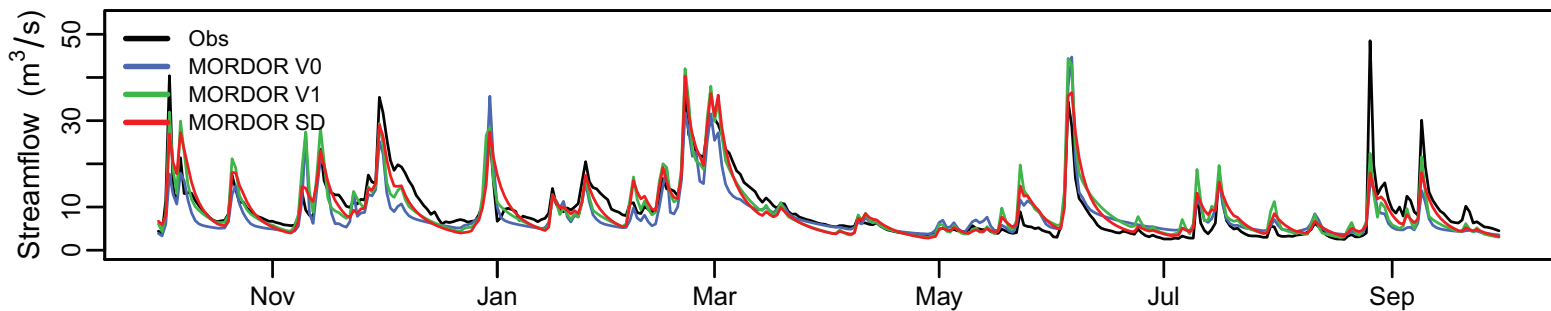

Year 2003

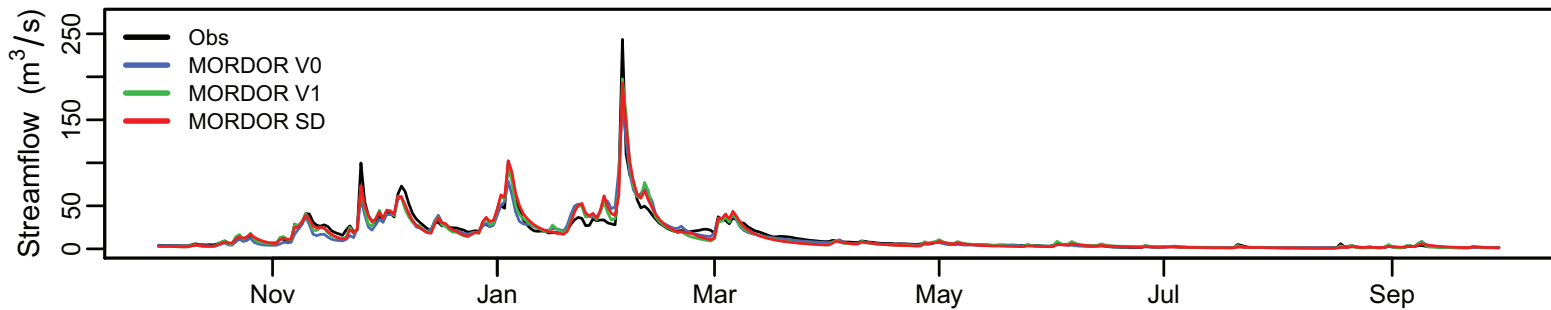

Year 2004

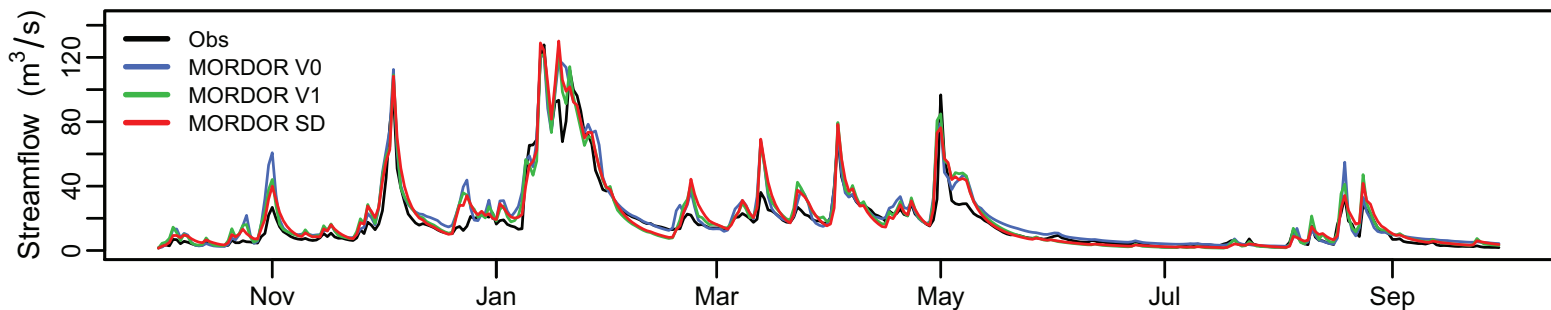

# Sioule@Fades

Year 2005

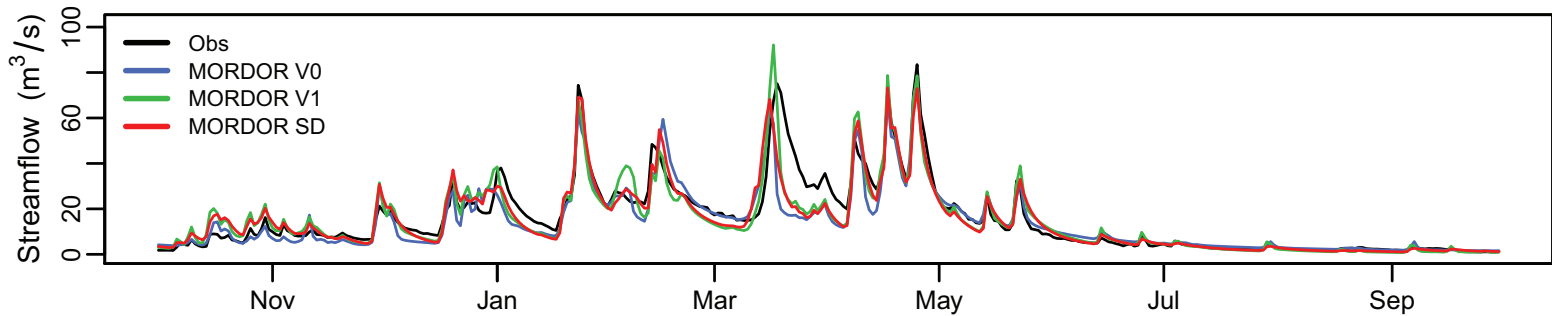

Year 2006

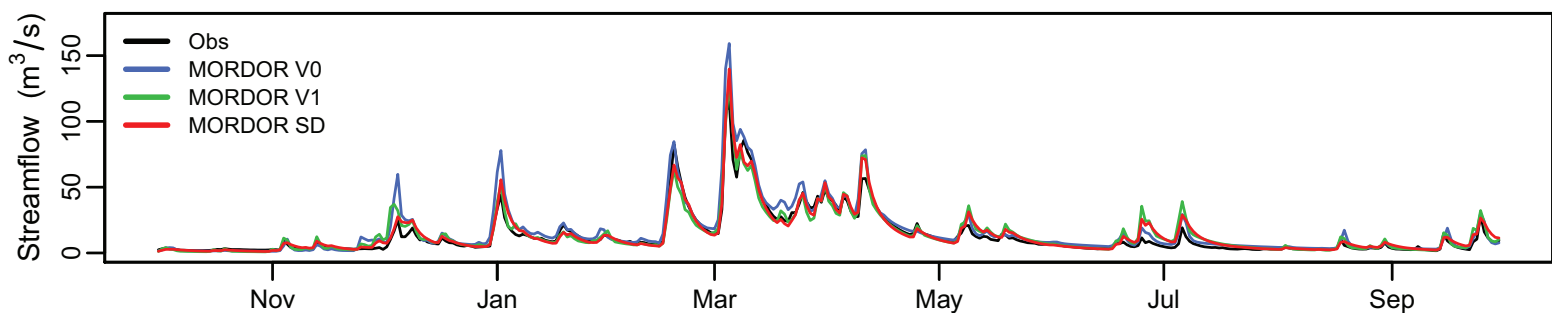

Year 2007

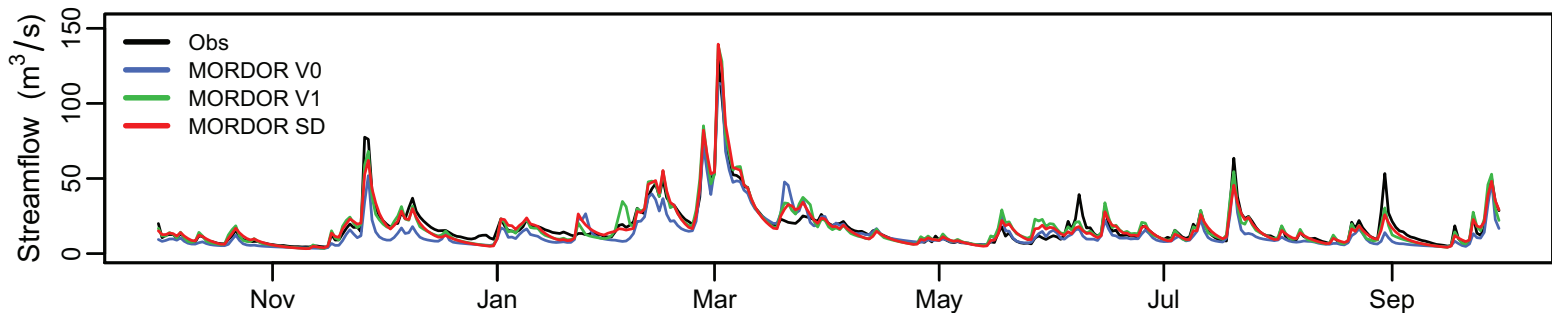

Year 2008

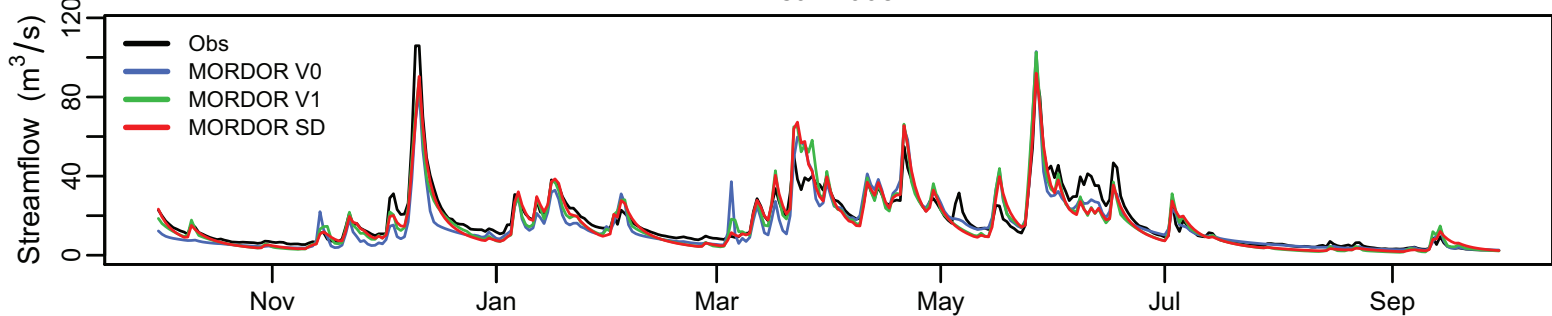

# Souloise@Infernet

Year 1992

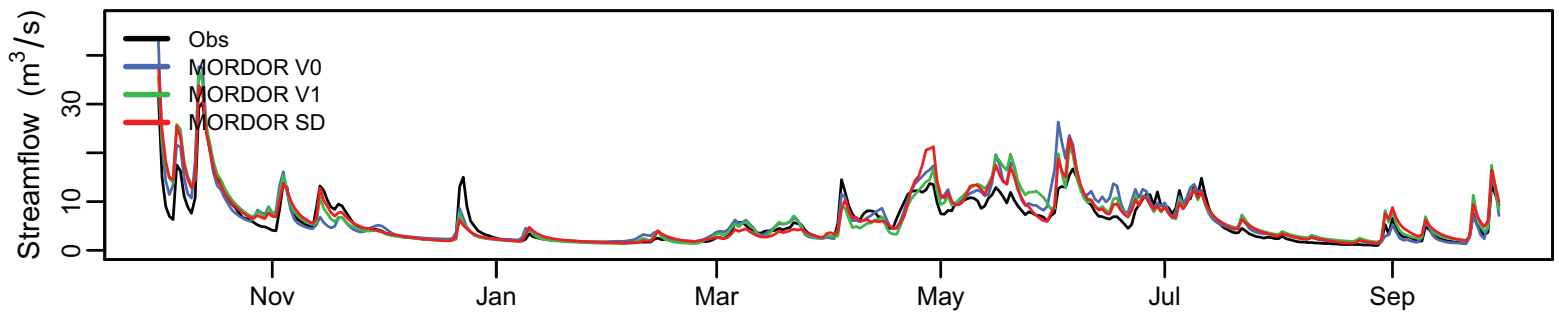

Year 1993

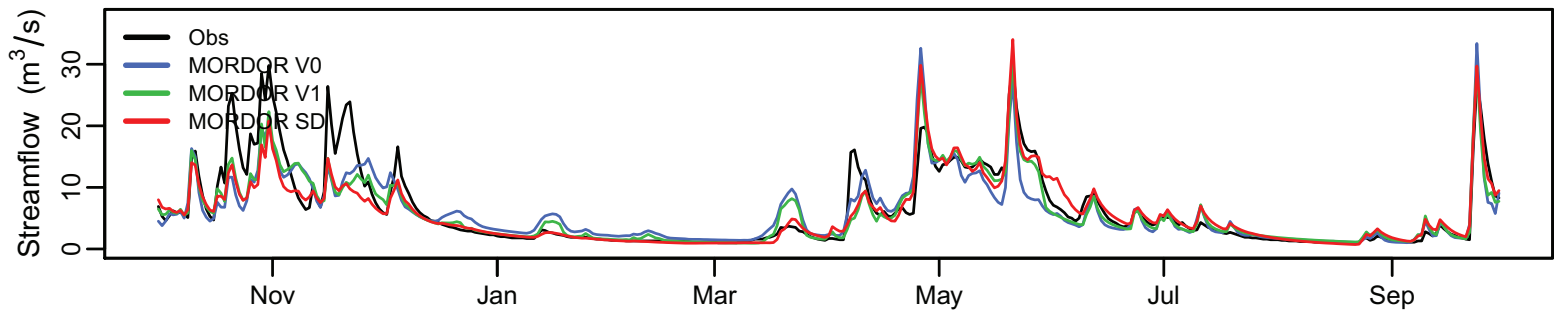

Year 1994

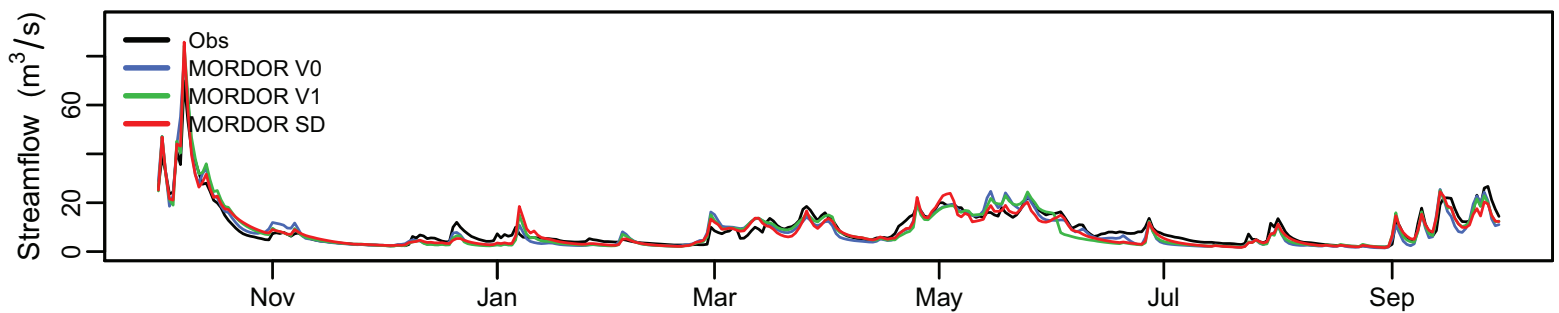

Year 1995

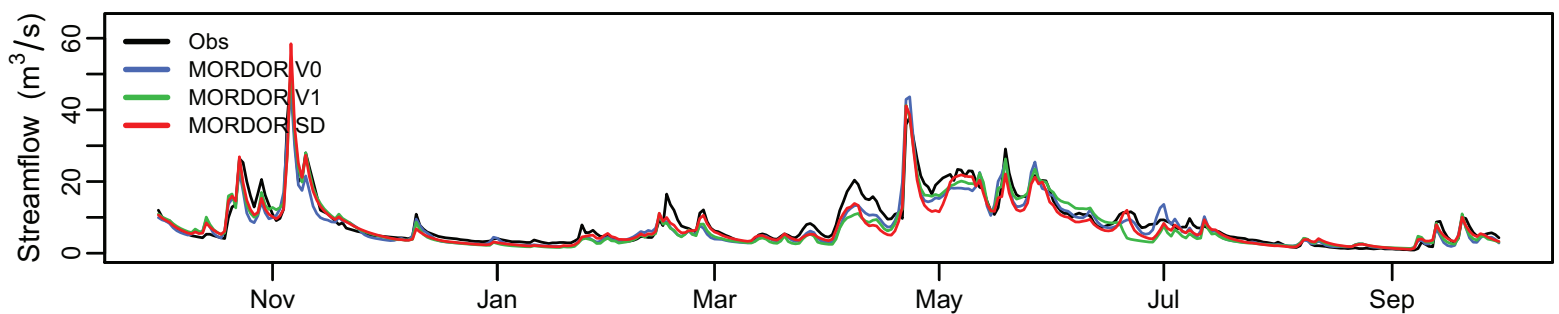

Year 1996

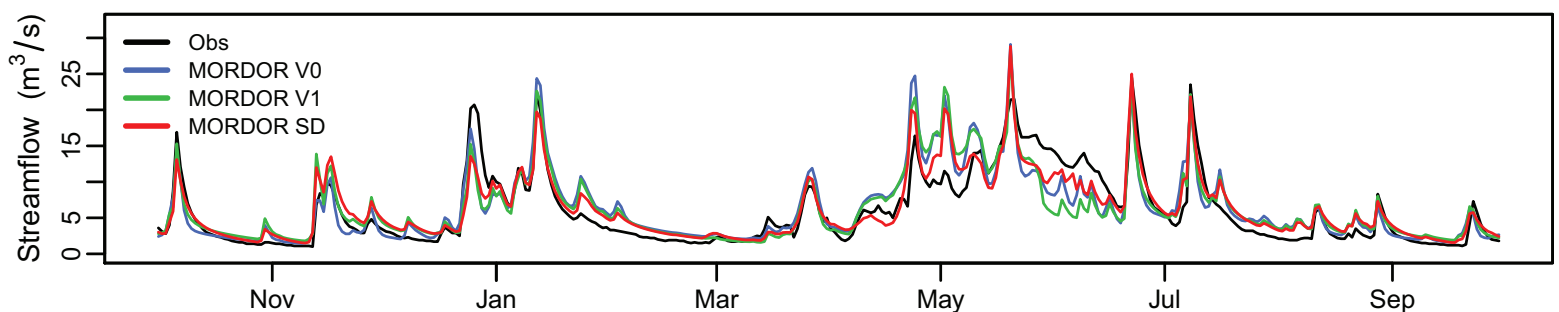

Year 1997

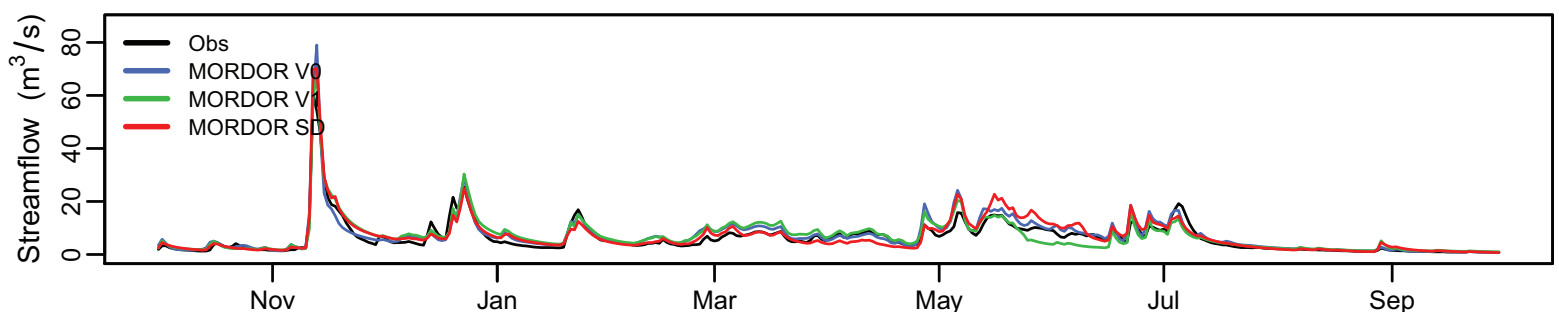

# Souloise@Infernet

Year 1998

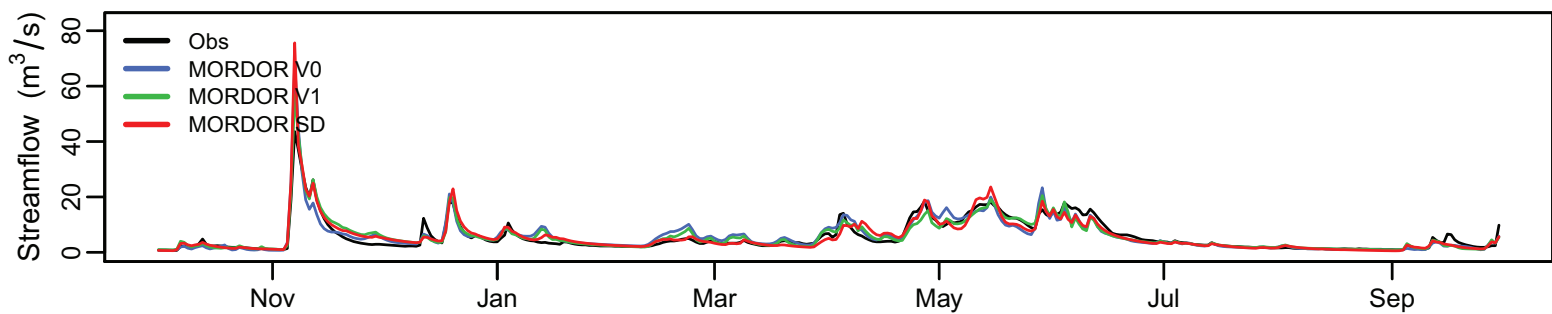

Year 1999

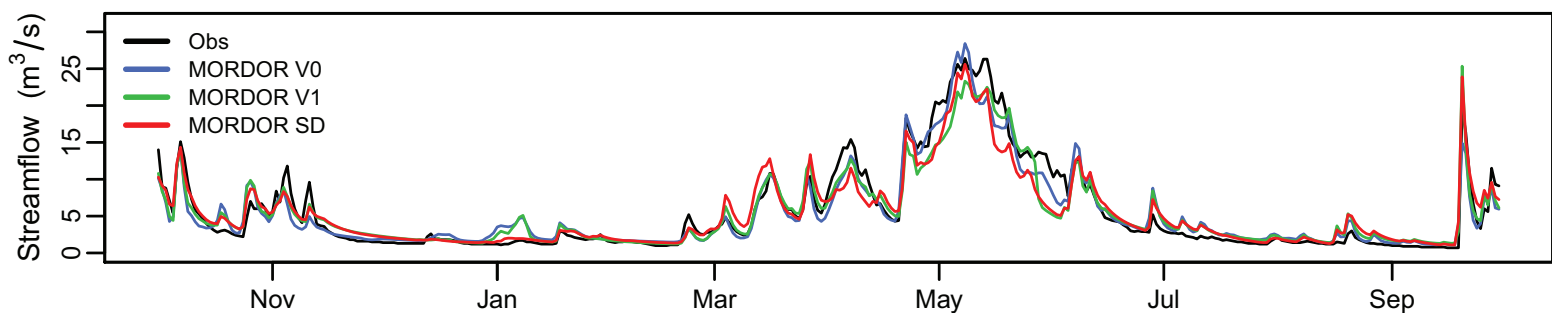

Year 2000

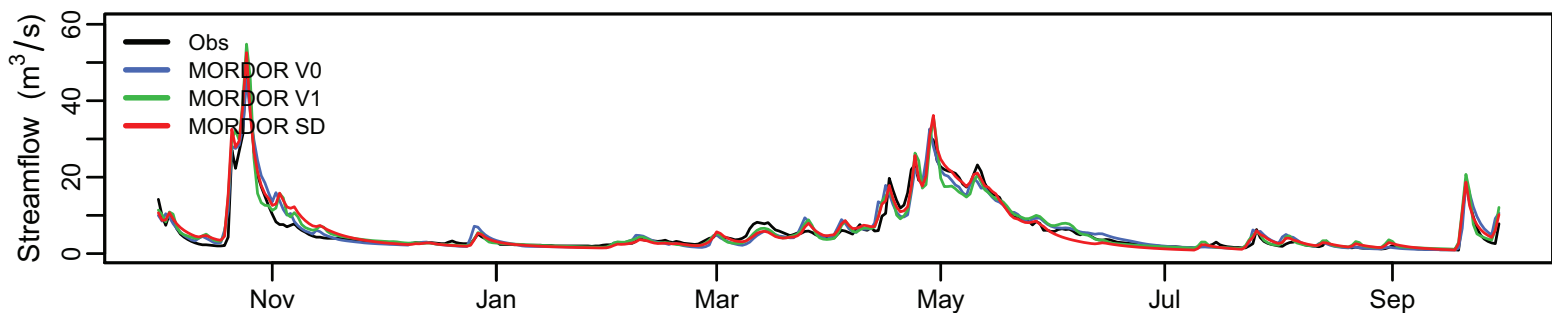

Year 2001

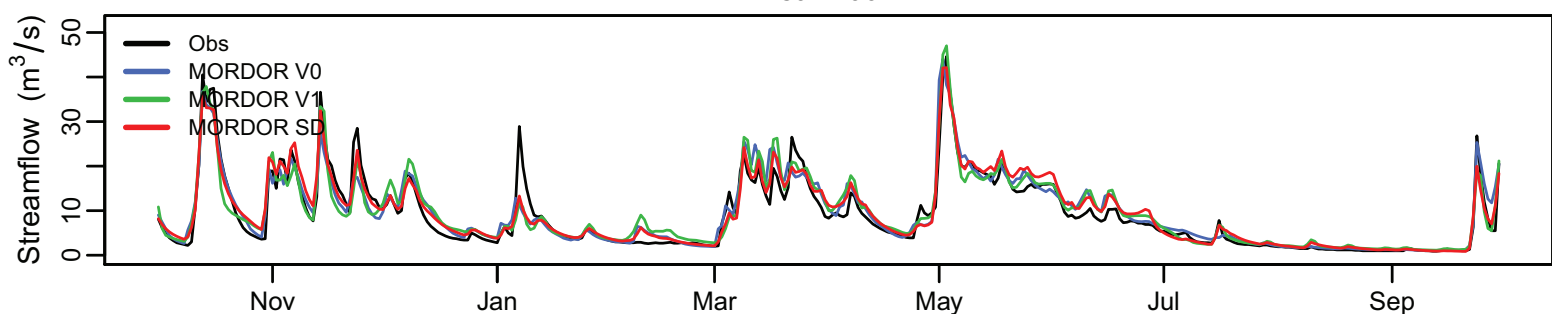

Year 2002

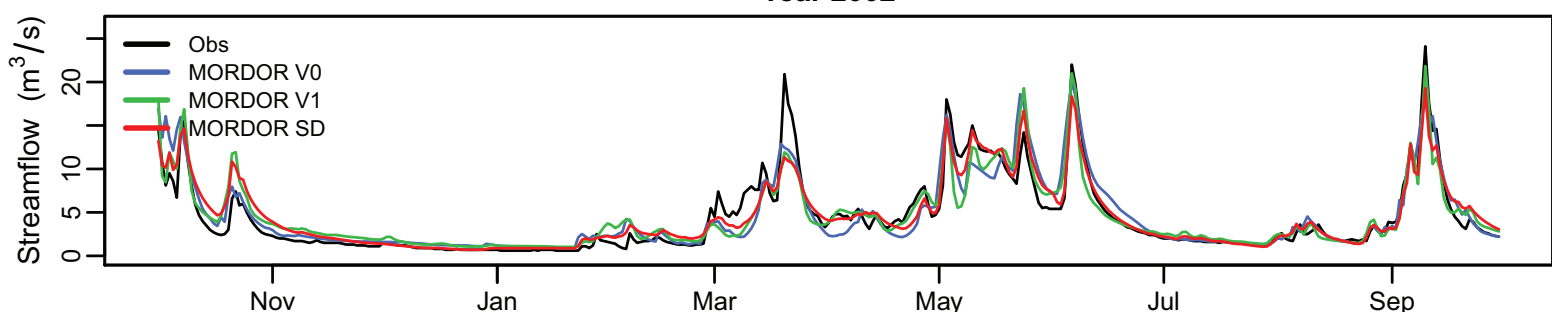

Year 2003

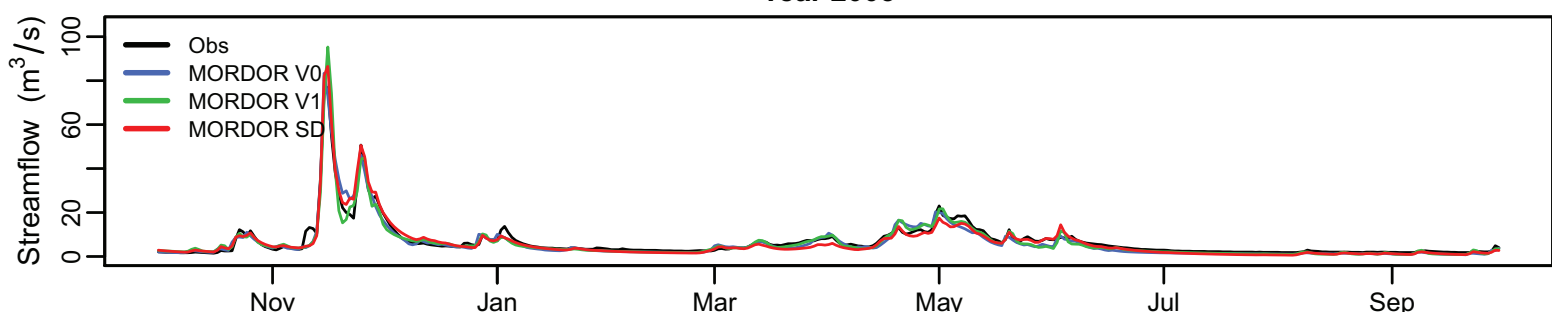

# Souloise@Infernet

Year 2004

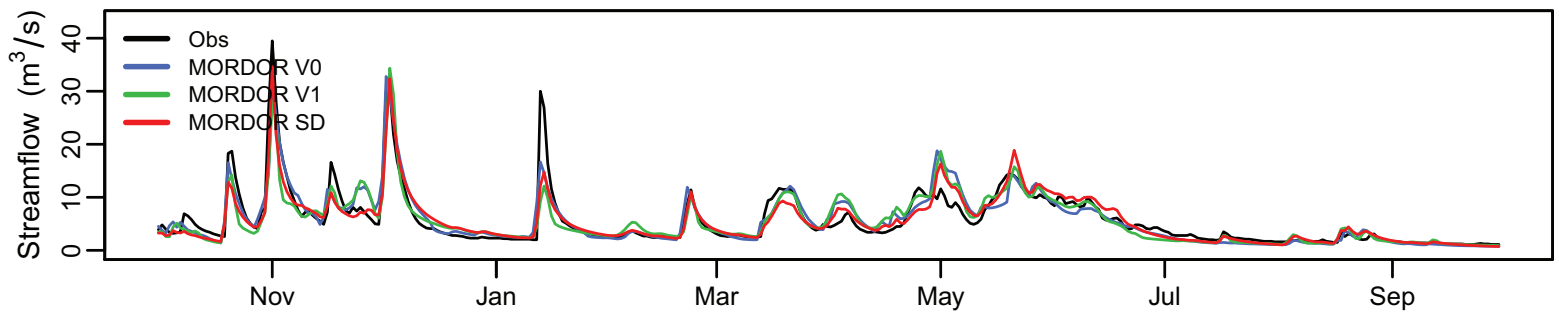

Year 2005

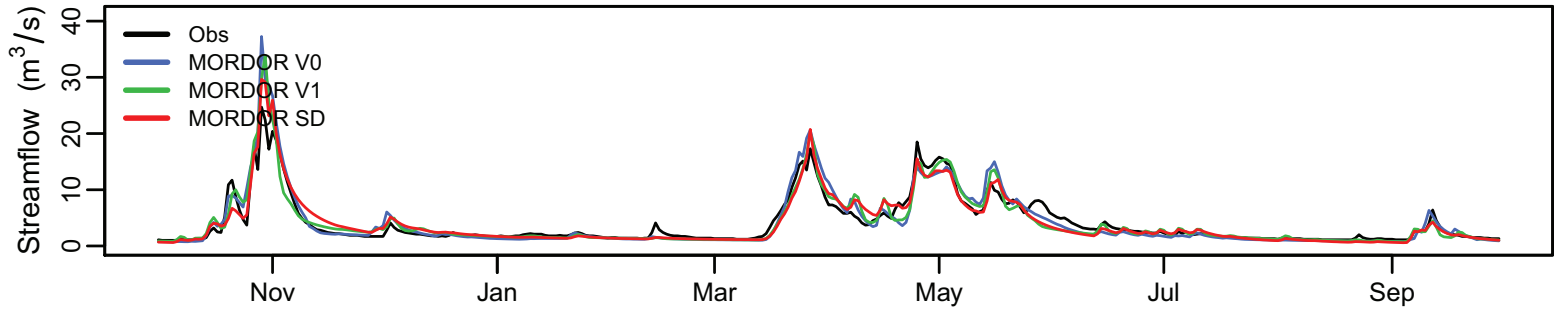

Year 2006

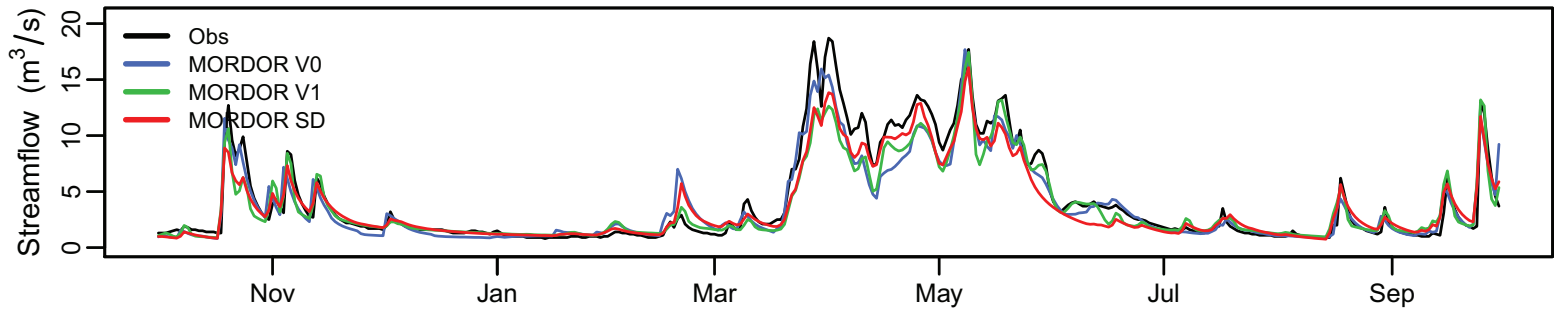

# Stura@Lanzo

Year 1955

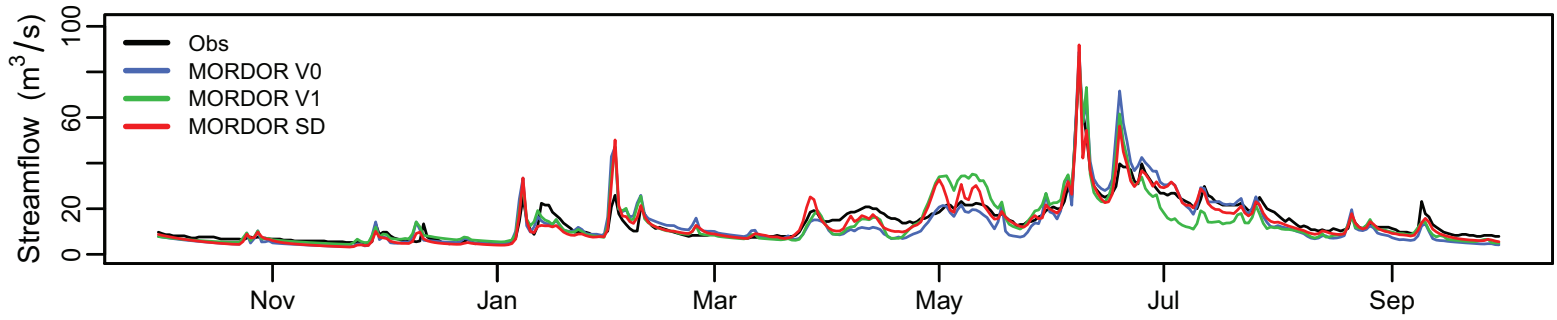

Year 1956

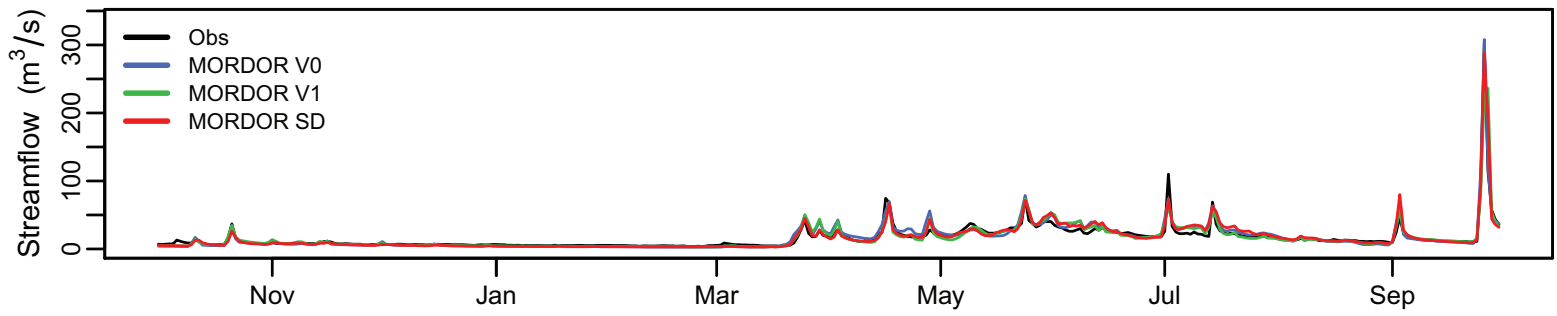

Year 1957

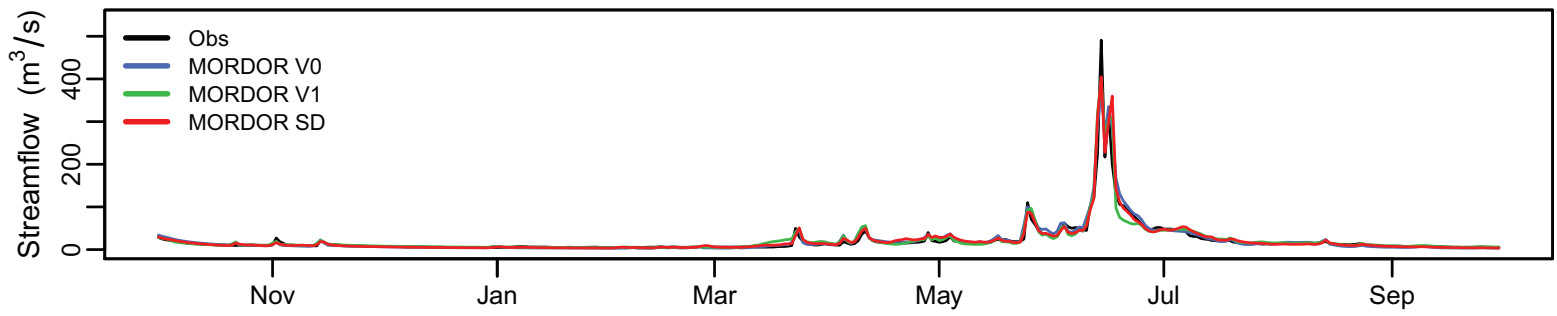

Year 1958

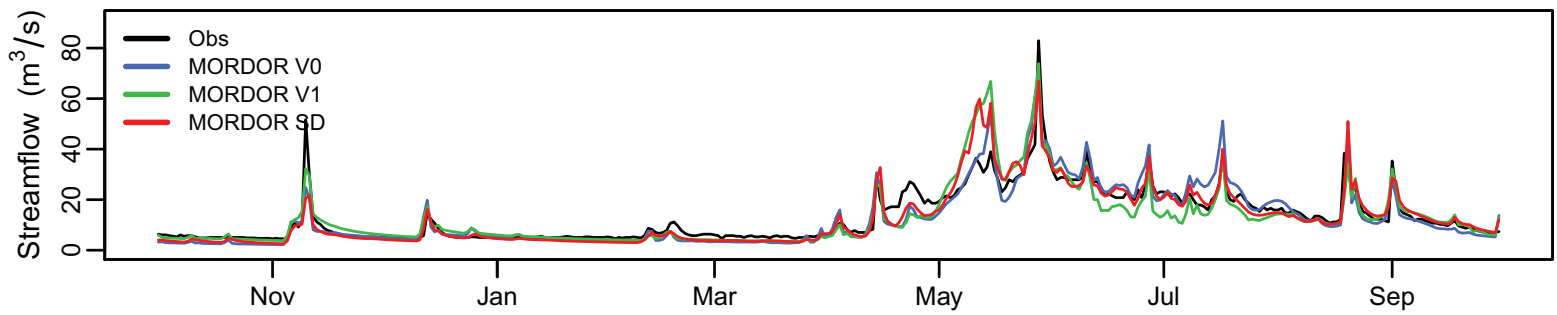

Year 1959

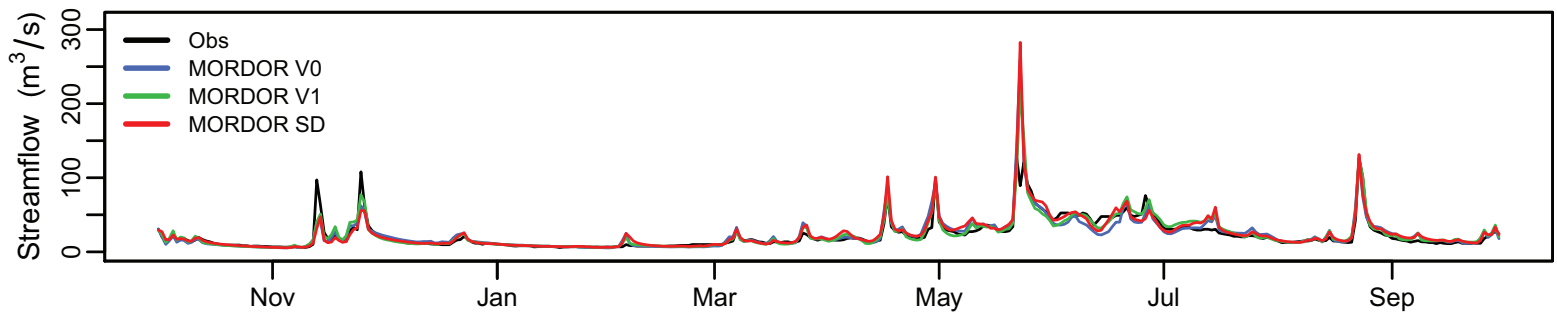

Year 1960

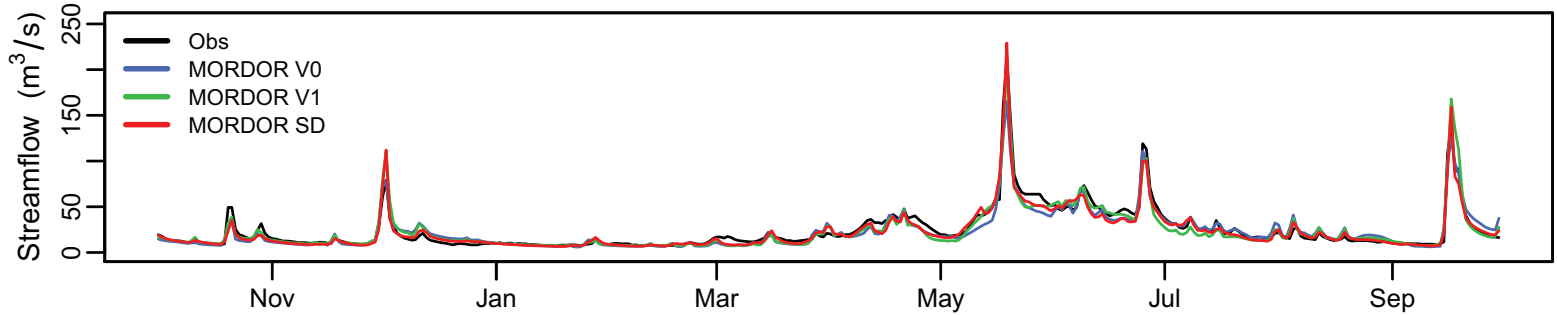

# Stura@Lanzo

Year 1961

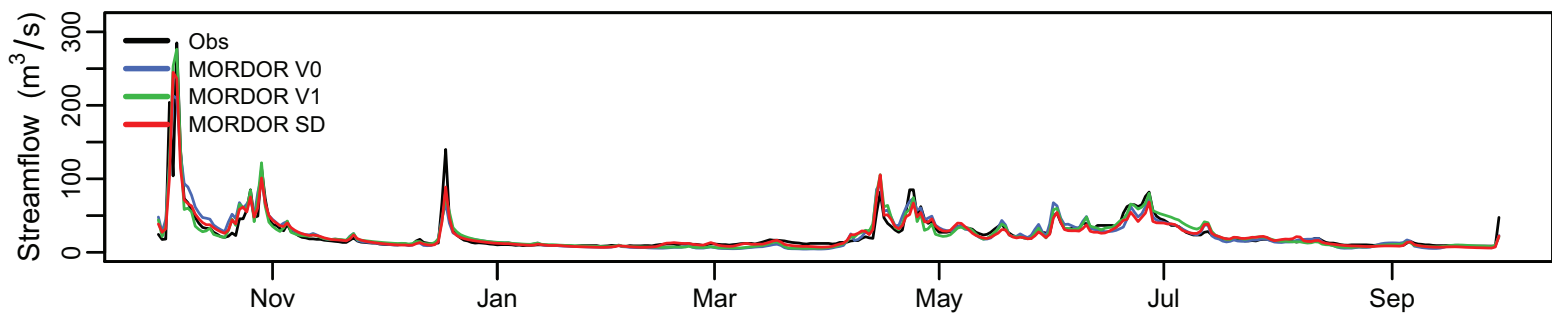

Year 1962

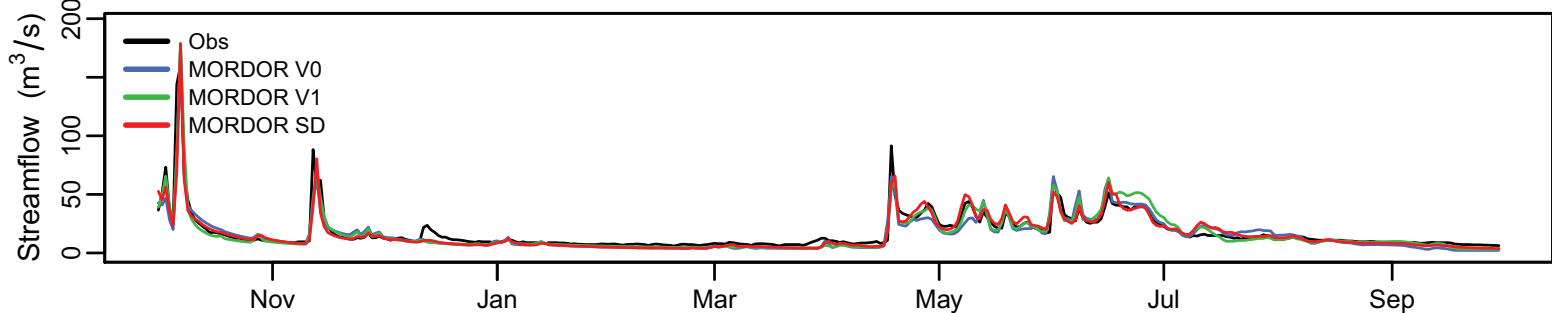

Year 1963

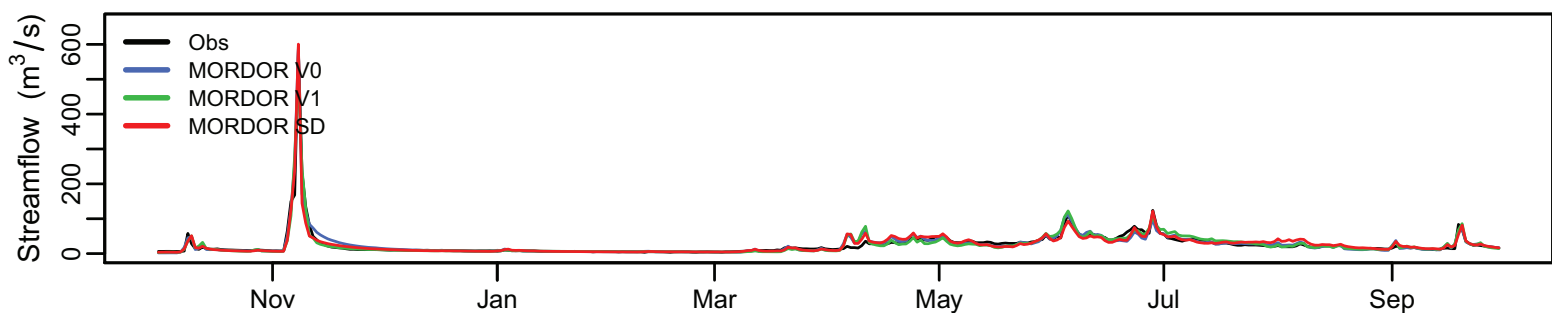

Year 1964

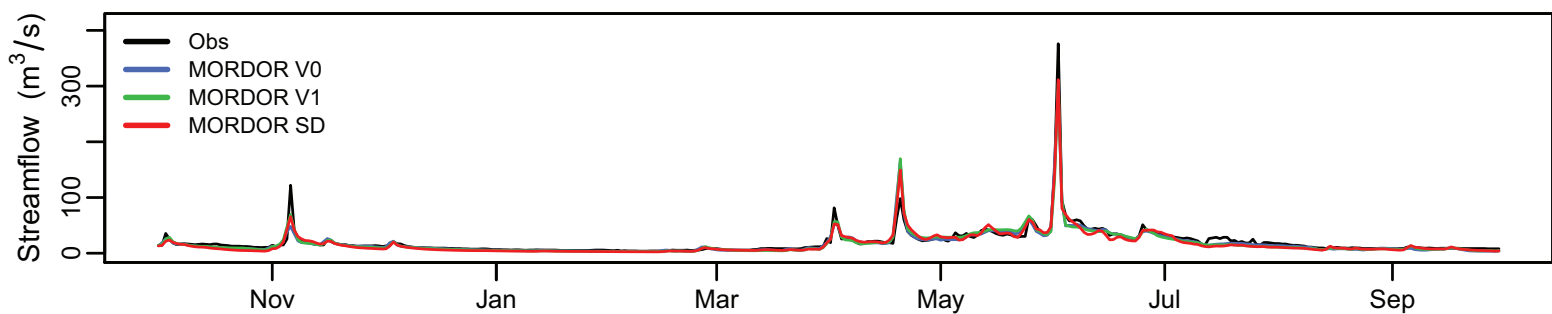

Year 1965

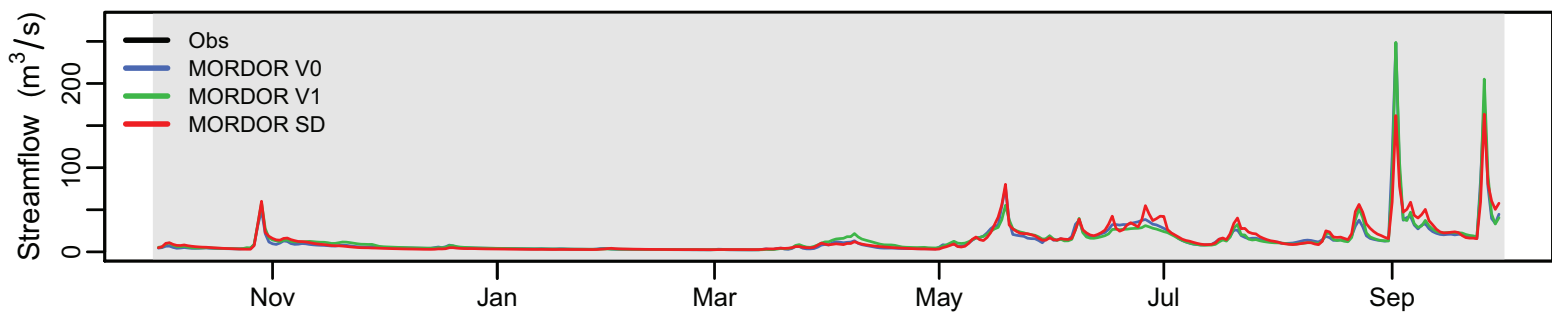

Year 1966

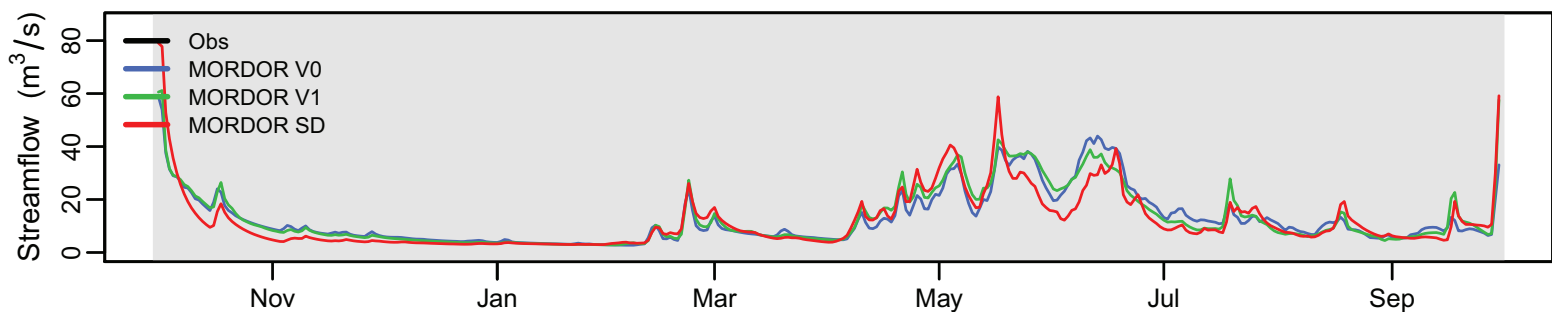

# Stura@Lanzo

Year 1967

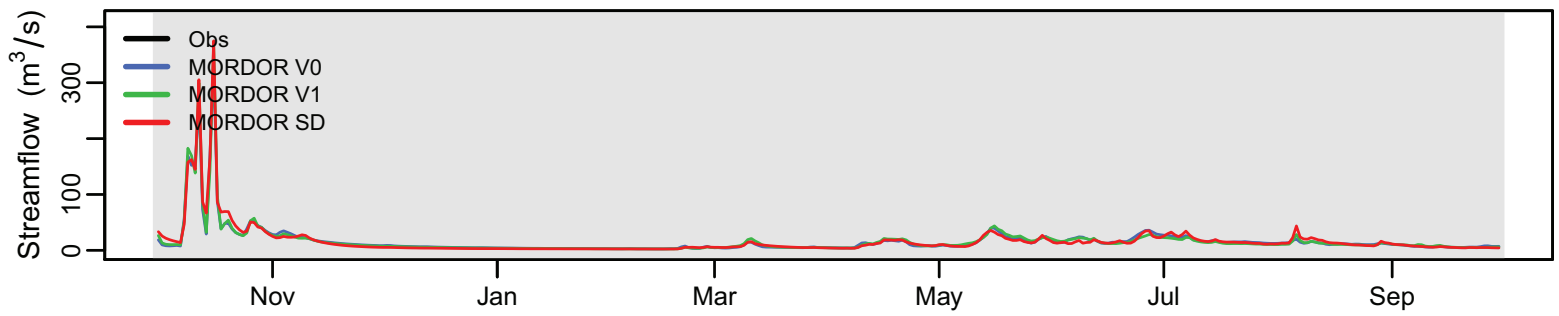

Year 1968

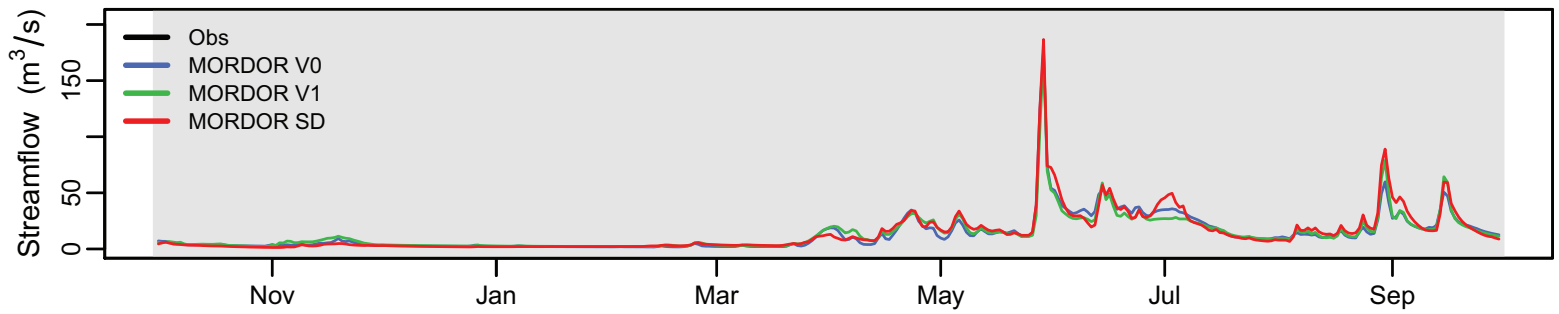

Year 1969

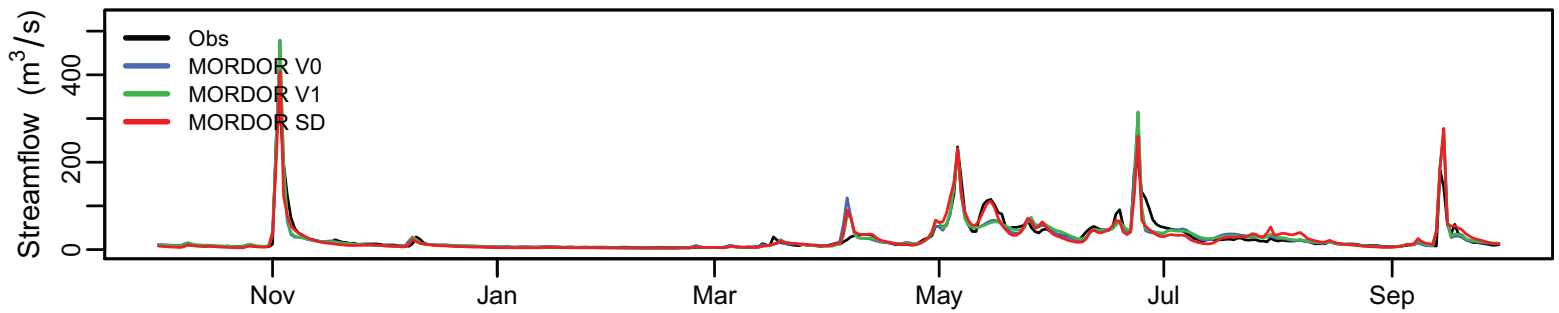

Year 1970

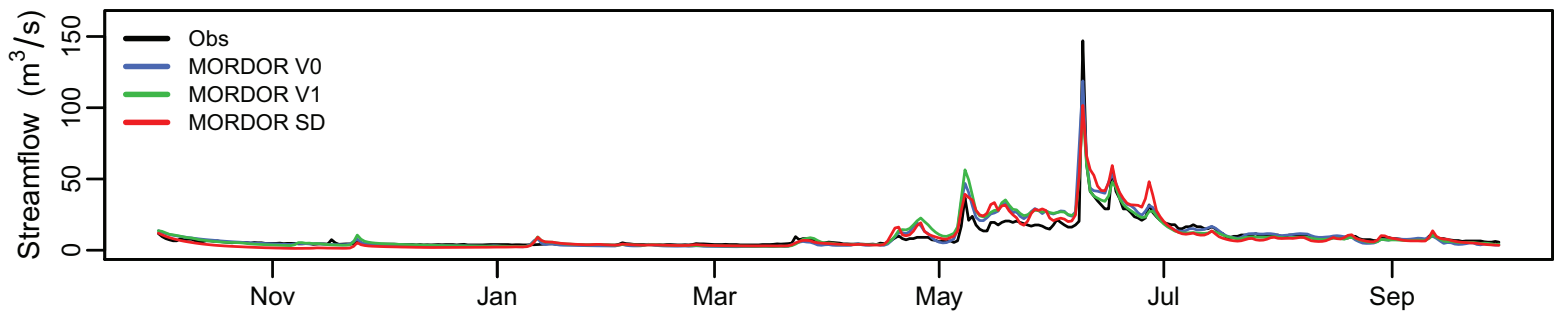

Year 1971

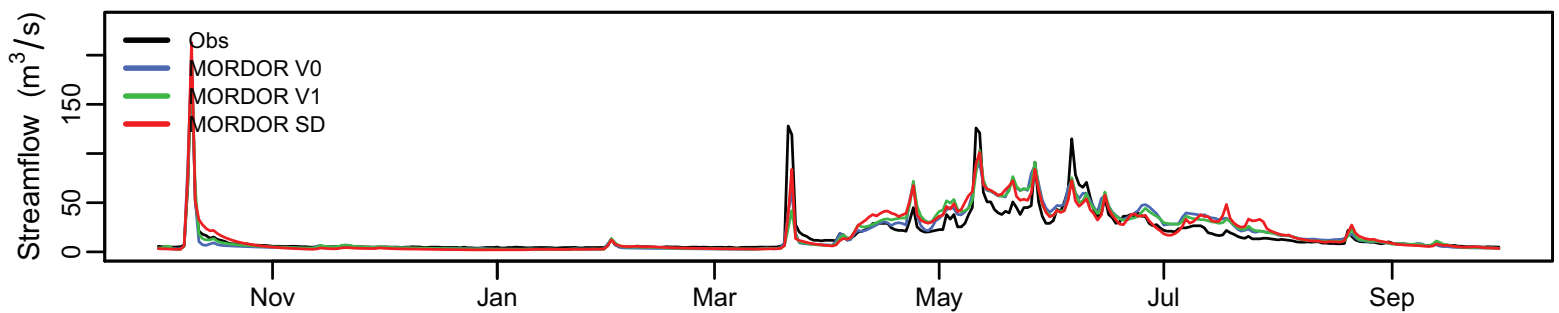

Year 1972

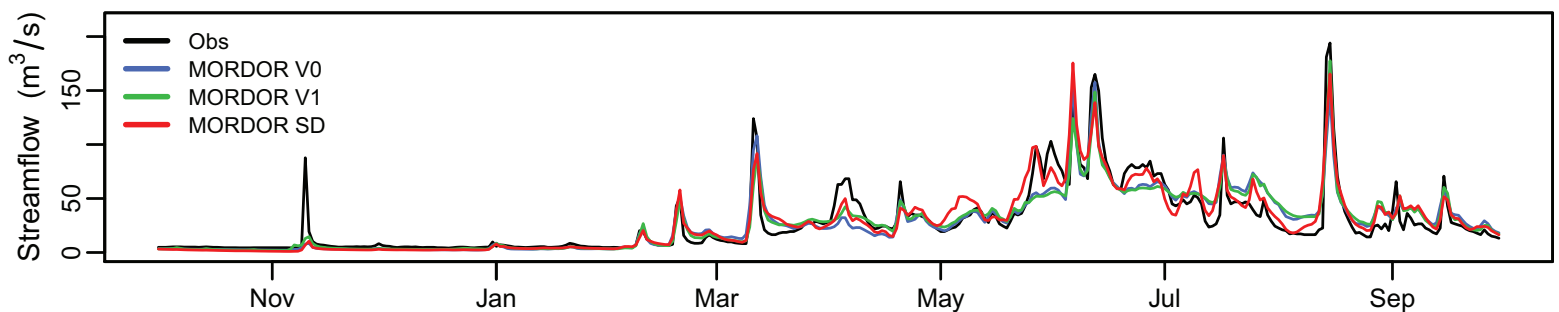



# Tarn@Cocures

Year 1986

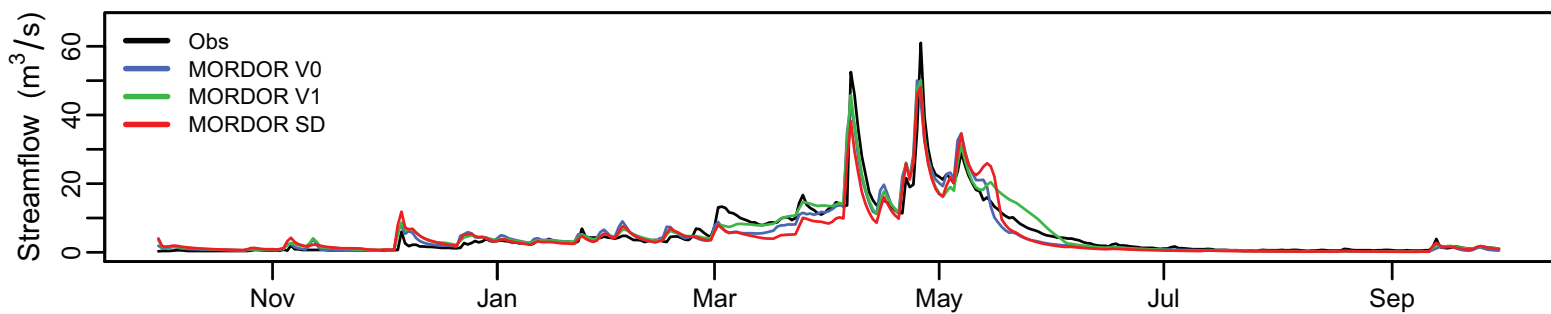

Year 1987

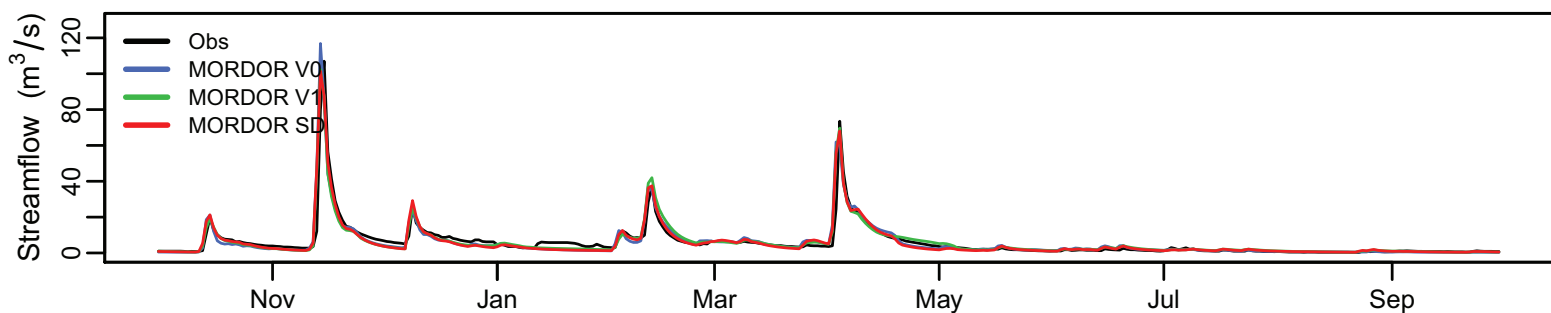

Year 1988

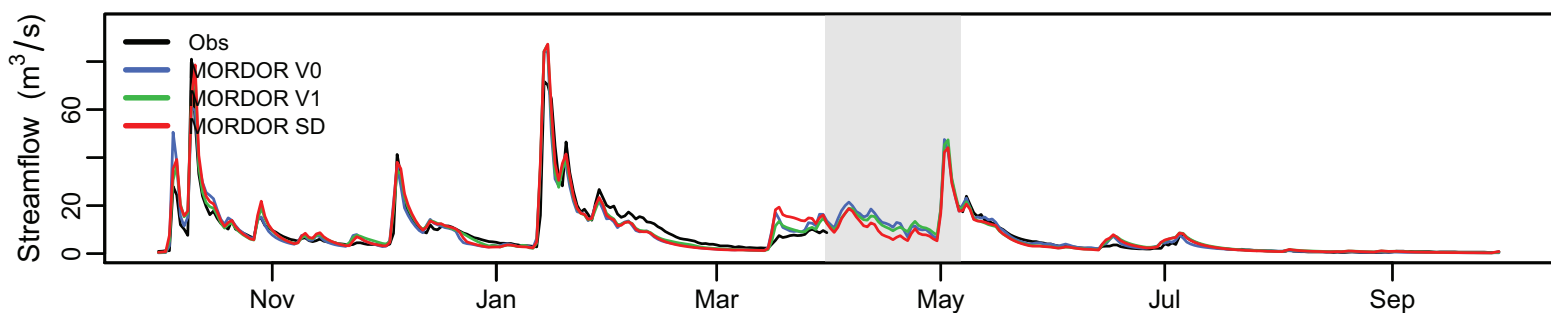

Year 1989

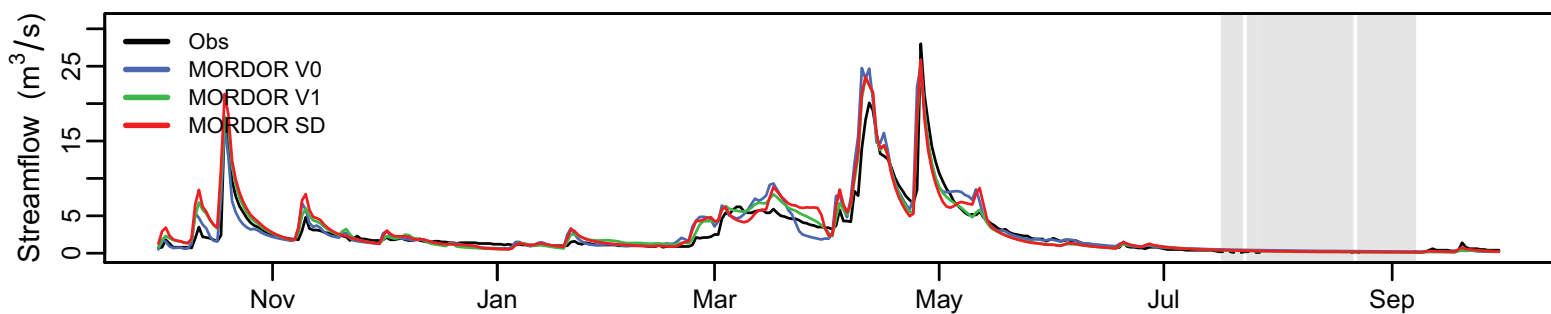

Year 1990

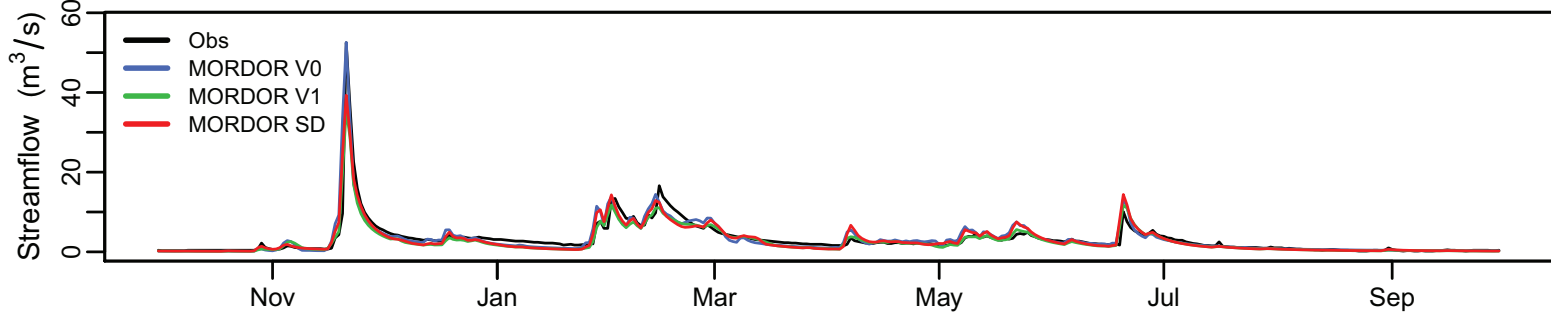

Year 1991

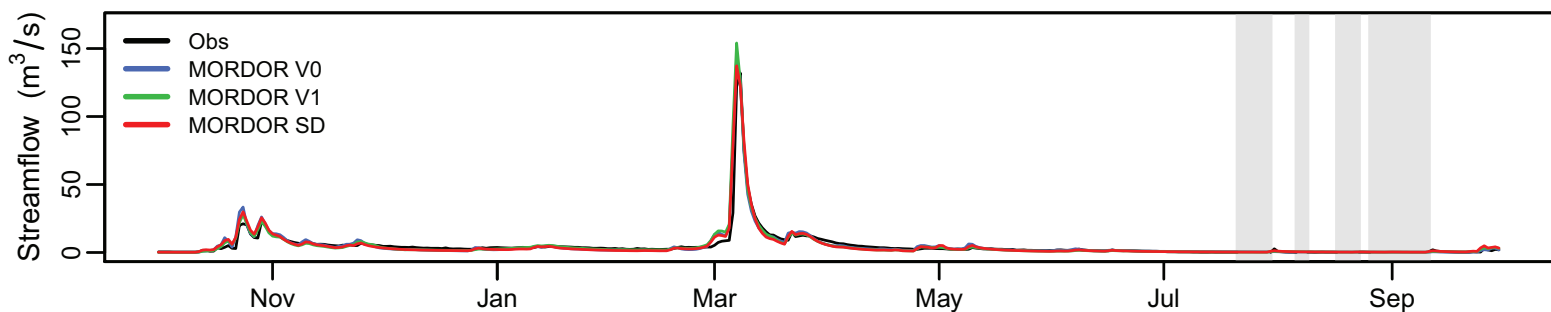

# Tarn@Cocures

Year 1992

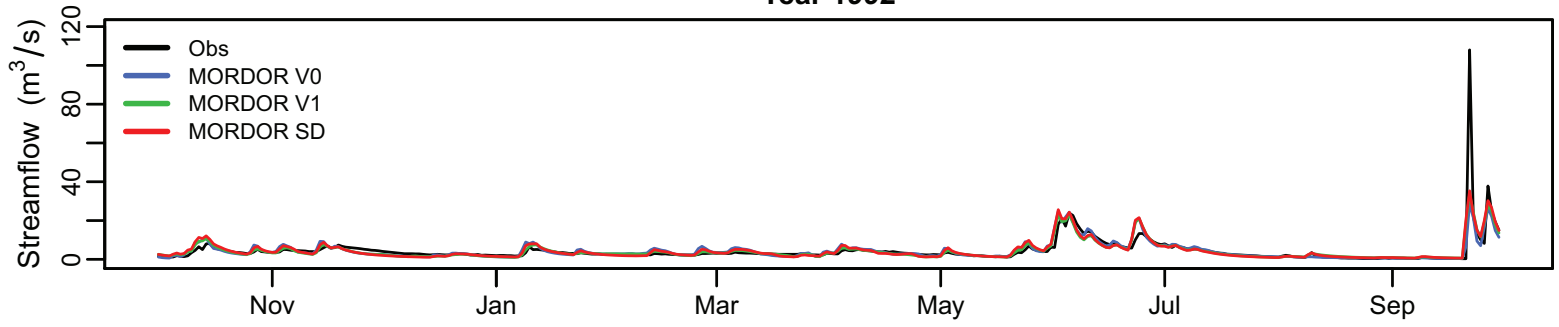

Year 1993

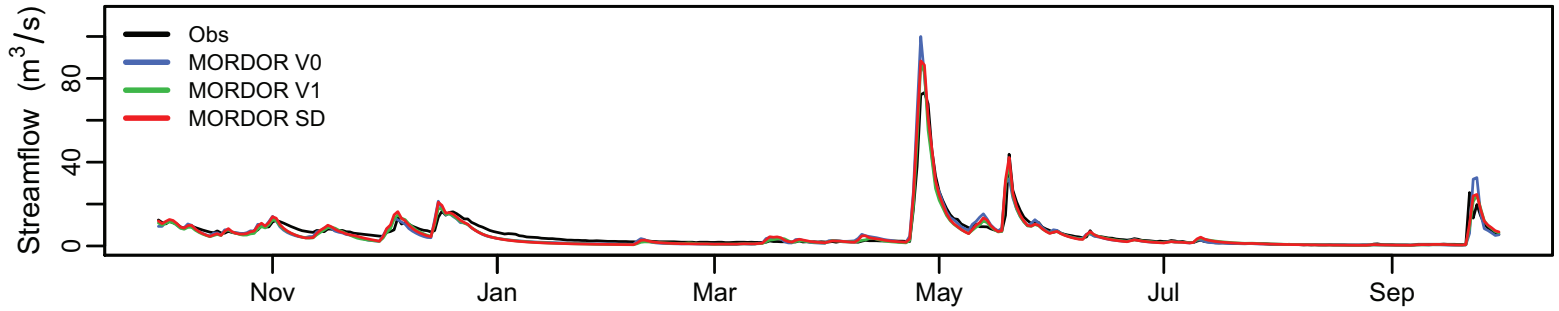

Year 1994

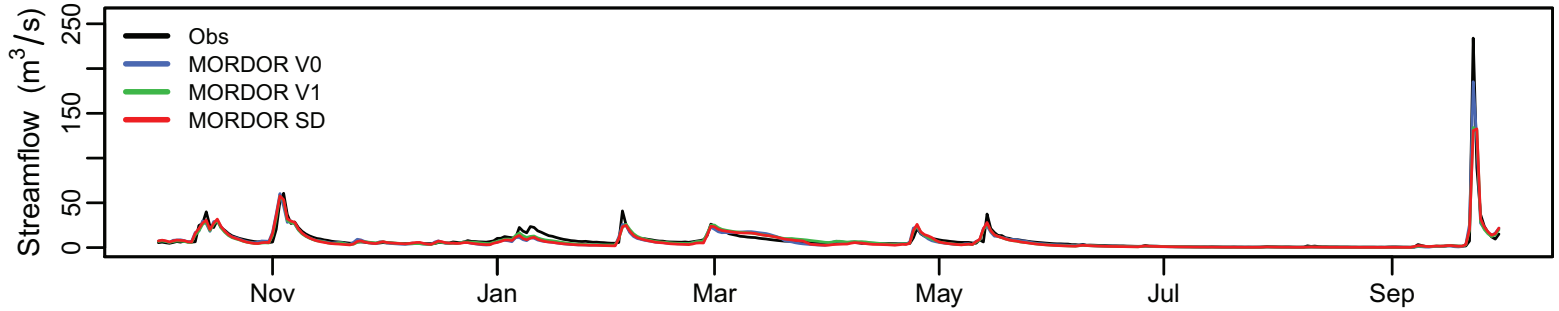

Year 1995

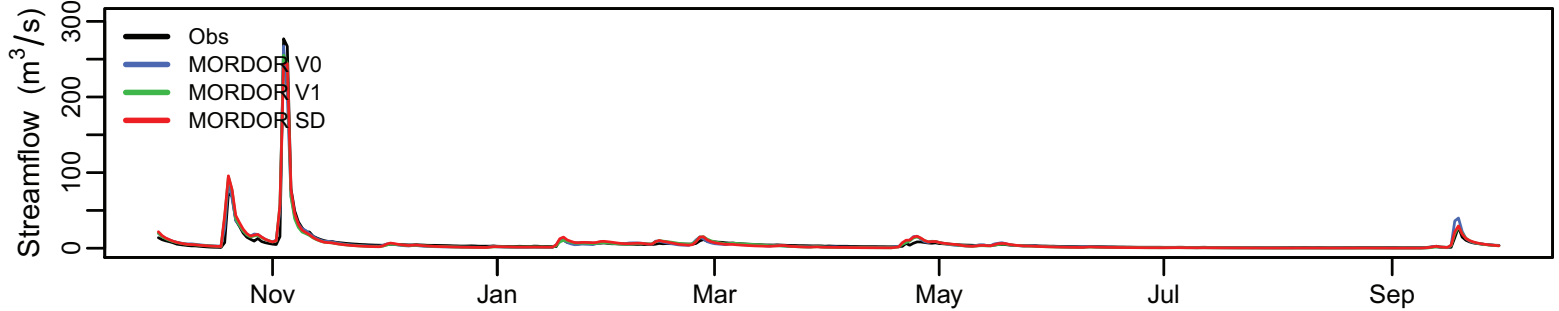

Year 1996

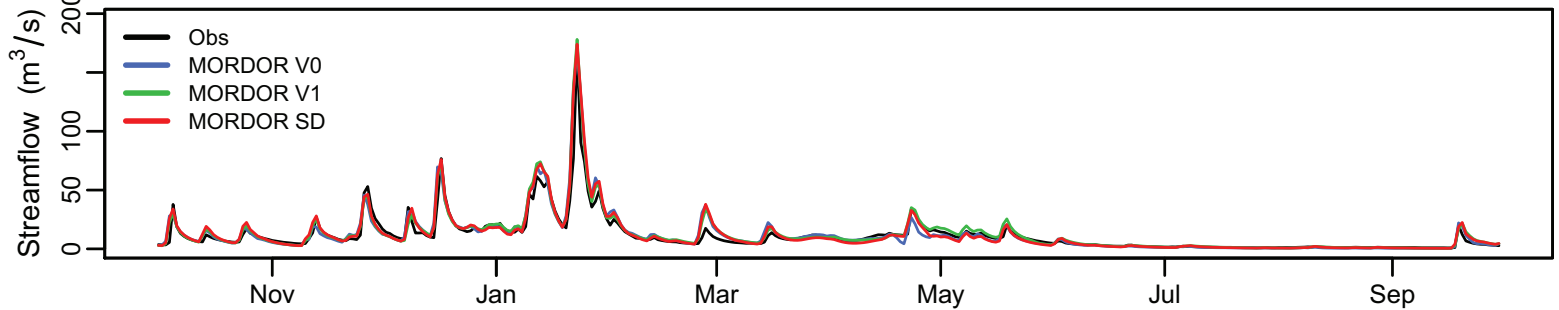

Year 1997

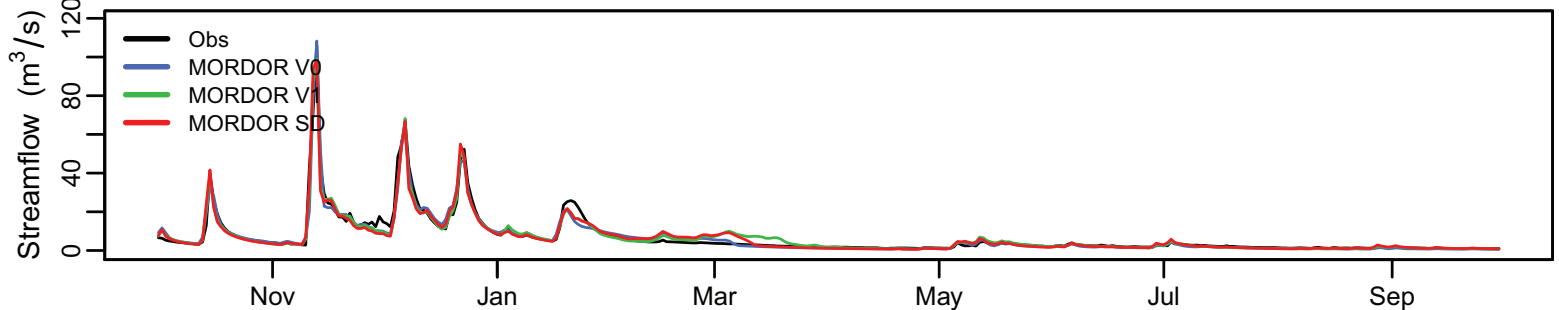

# Tarn@Cocures

Year 1998

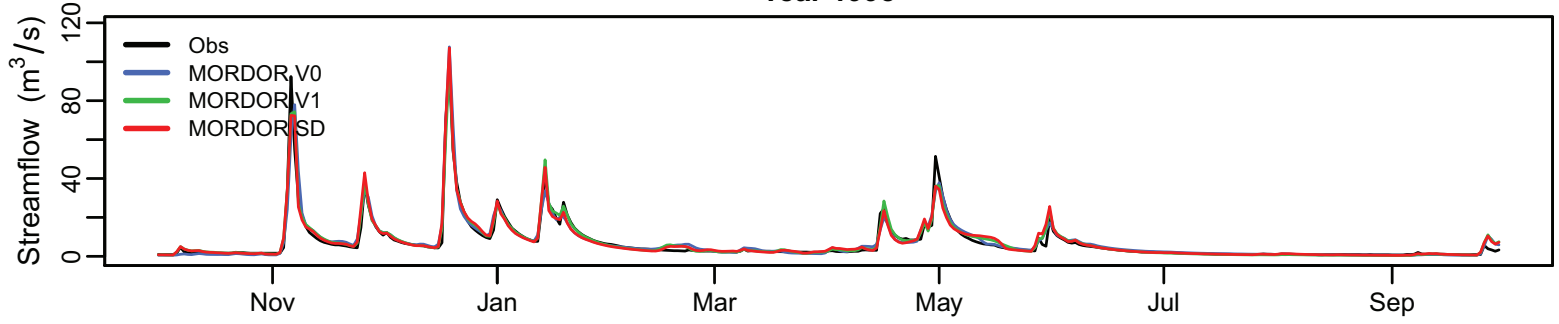

Year 1999

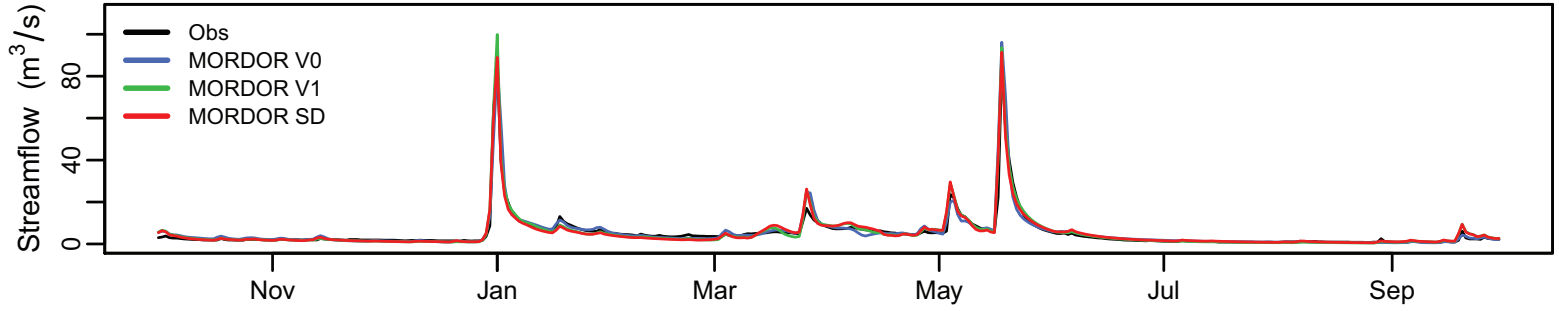

Year 2000

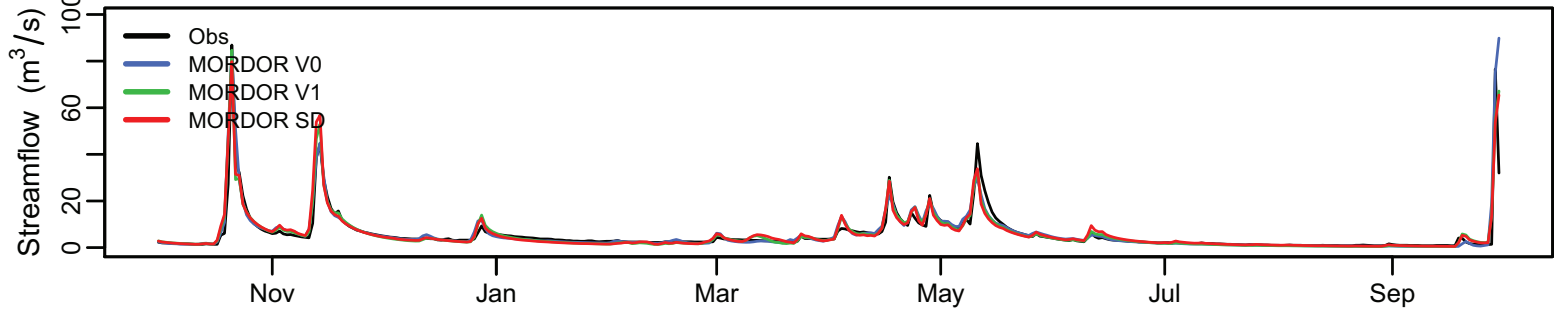

Year 2001

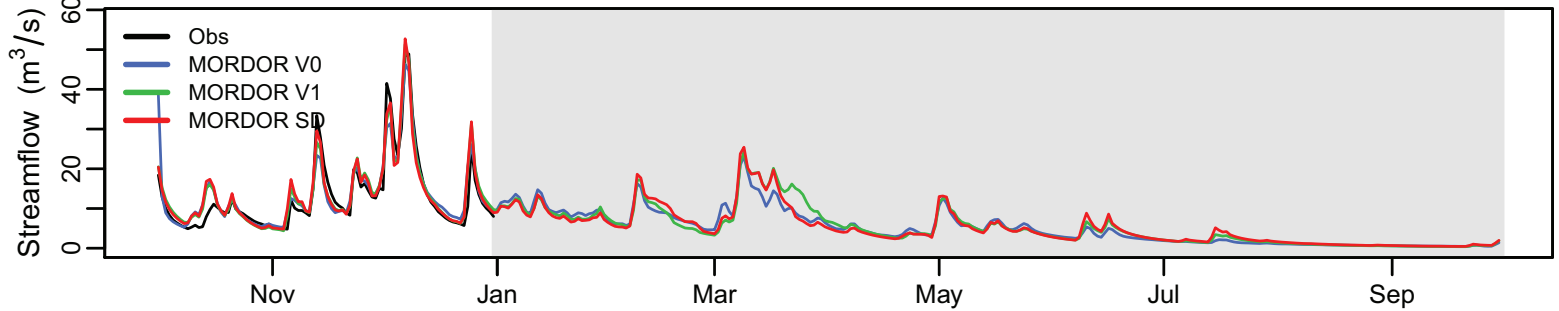

Year 2002

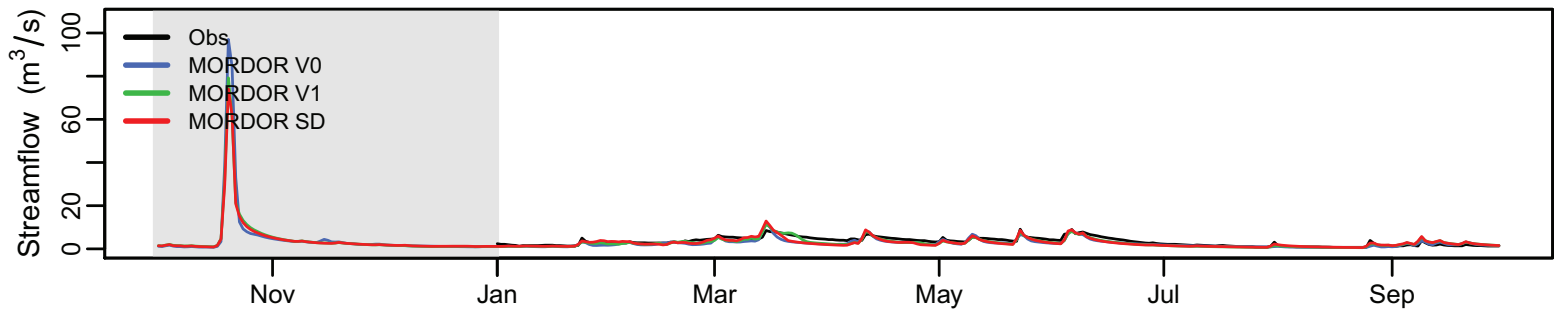

Year 2003

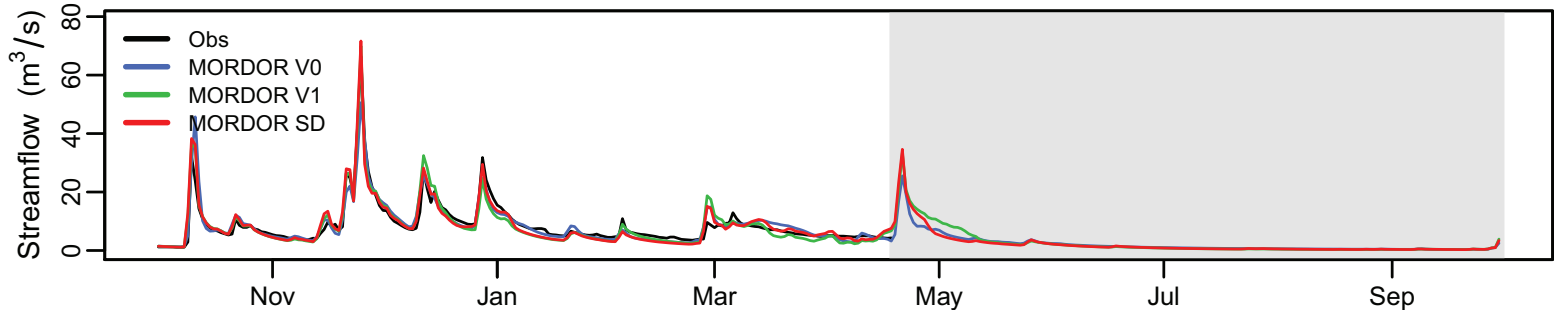

# Tarn@Cocures

Year 2004

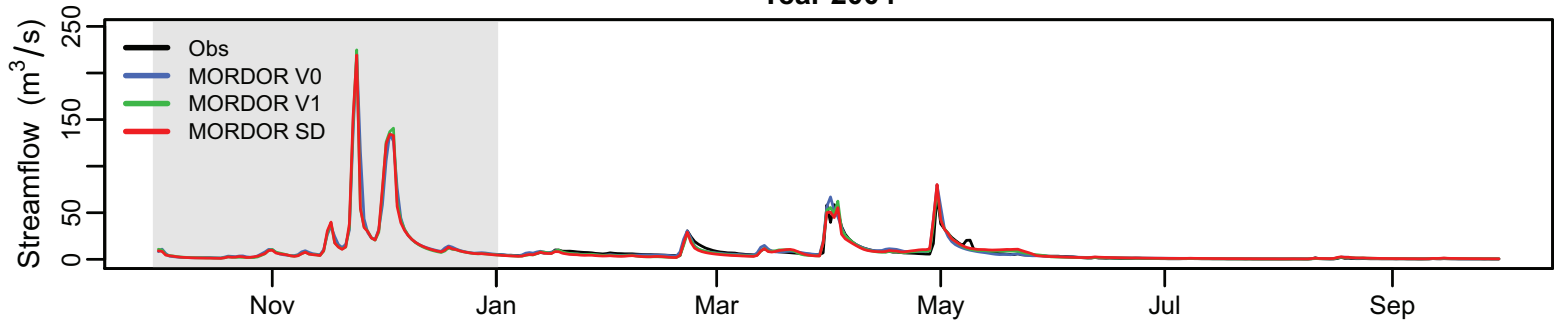

Year 2005

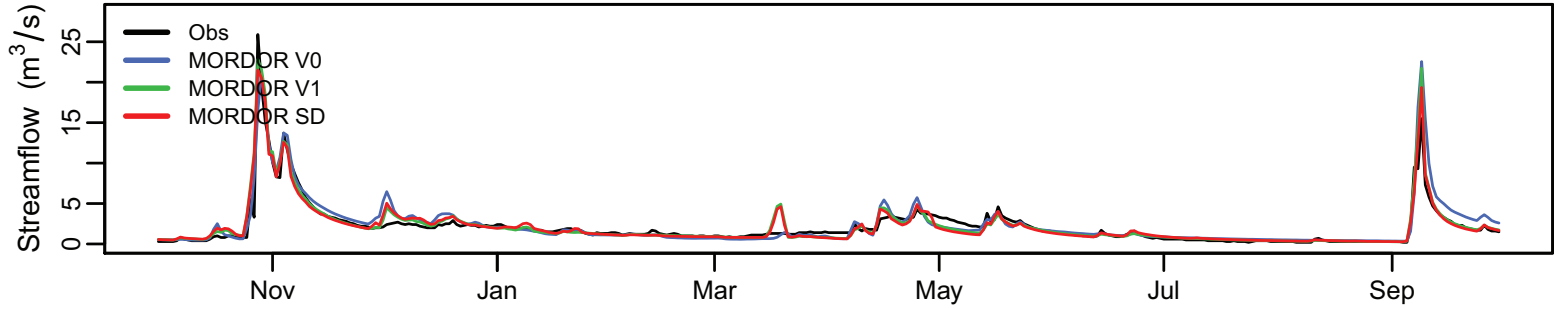

Year 2006

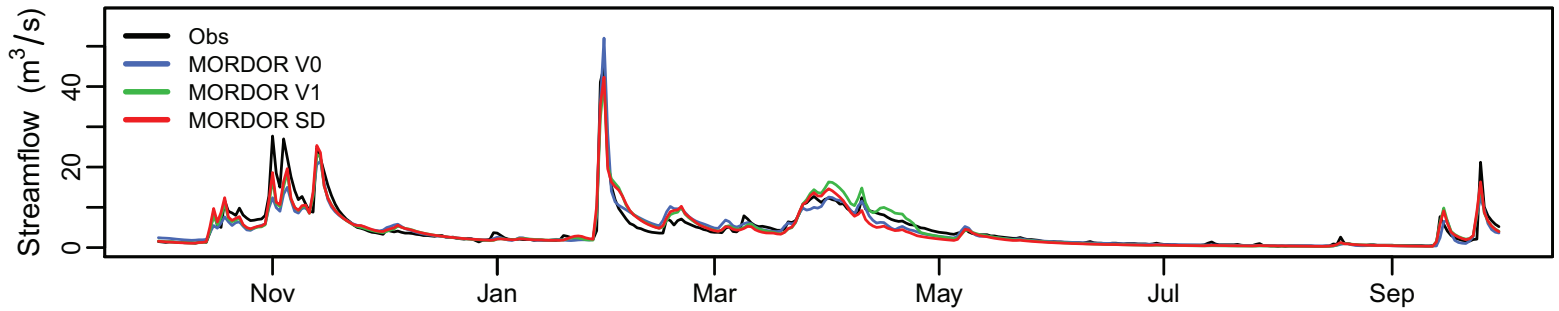

# Tarn@Millau

Year 1981

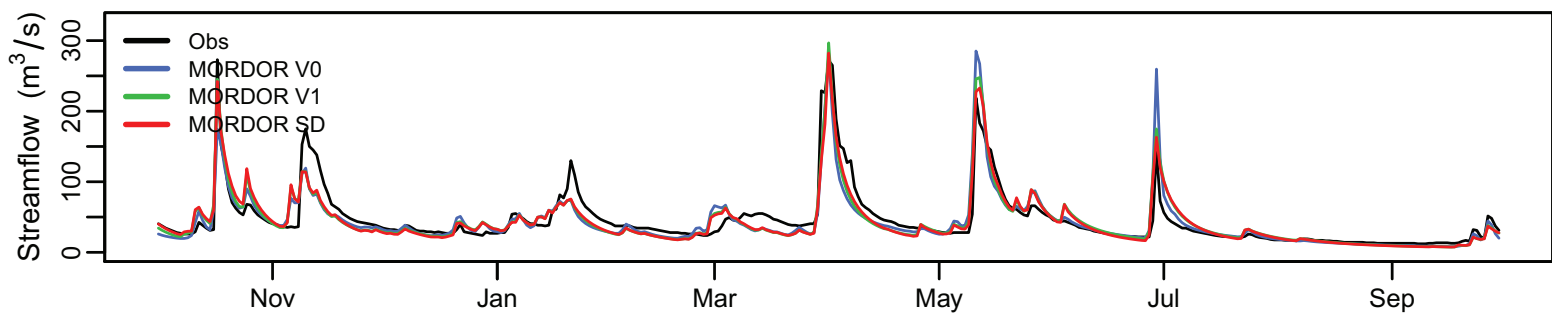

Year 1982

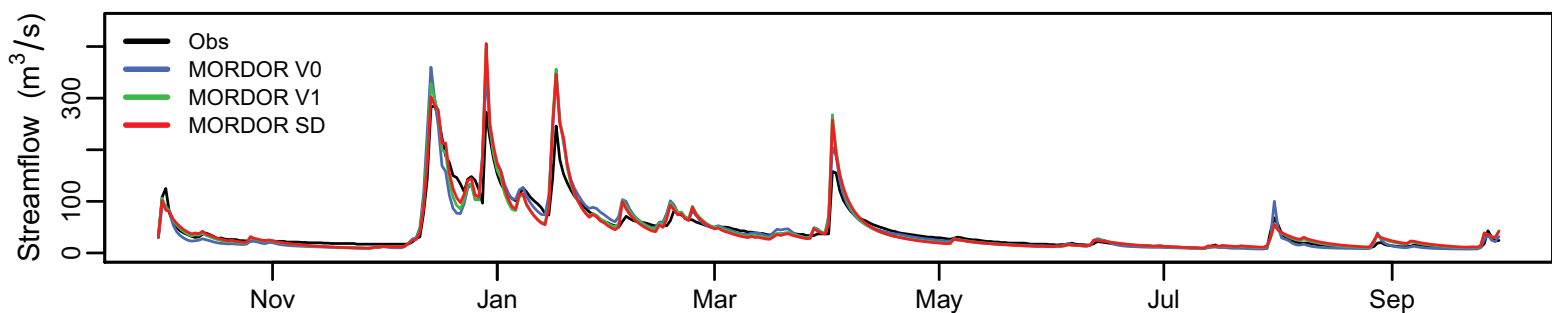

Year 1983

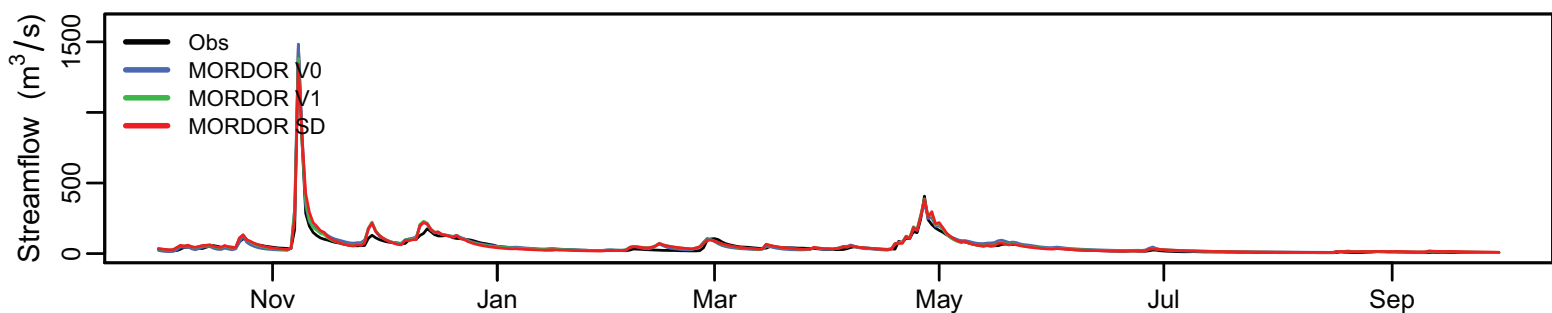

Year 1984

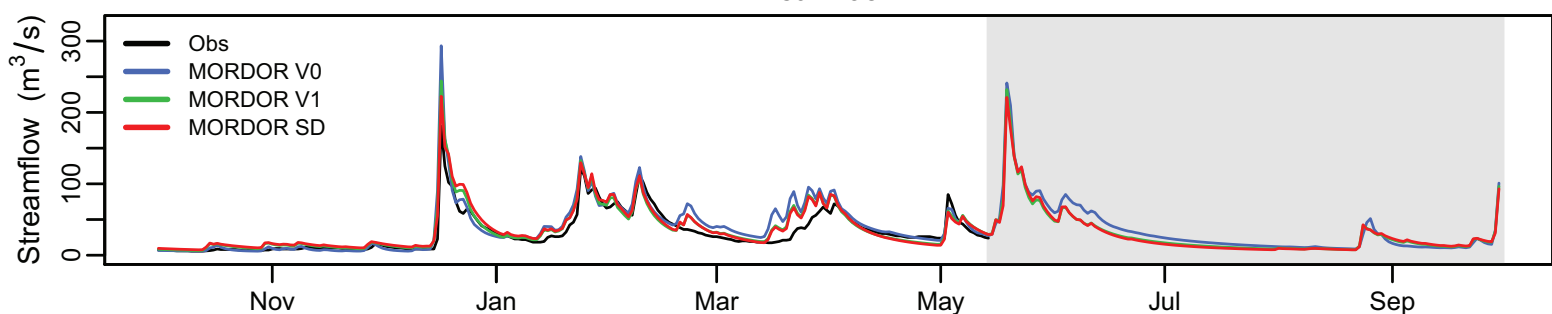

Year 1985

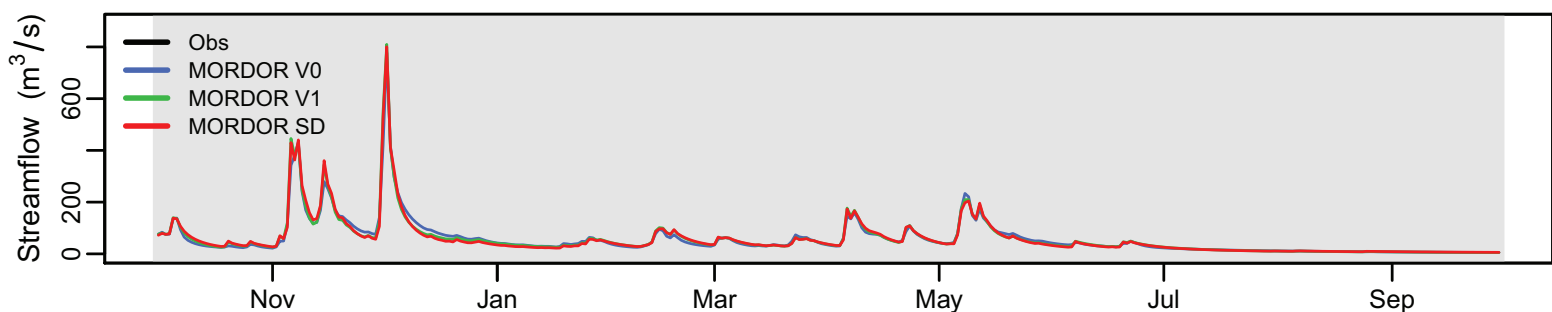

Year 1986

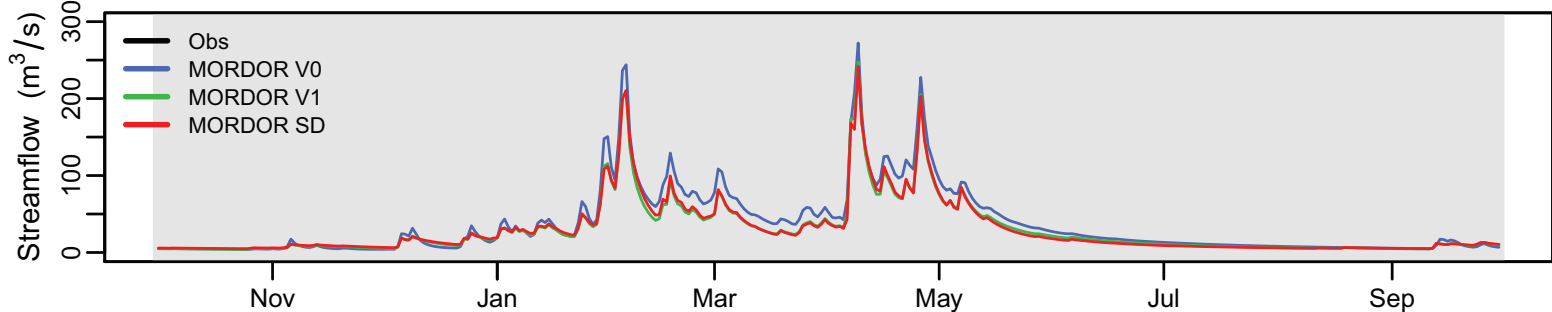

# Tarn@Millau

Year 1987

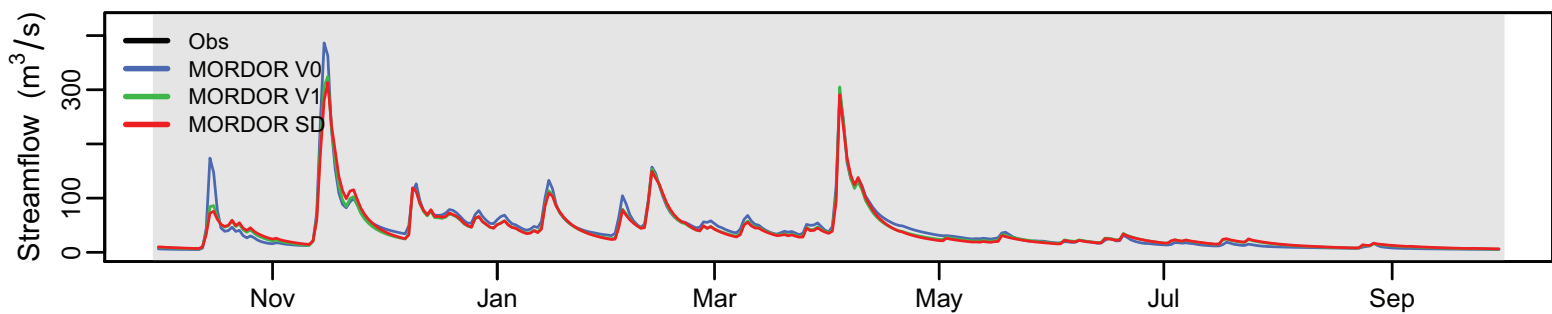

Year 1988

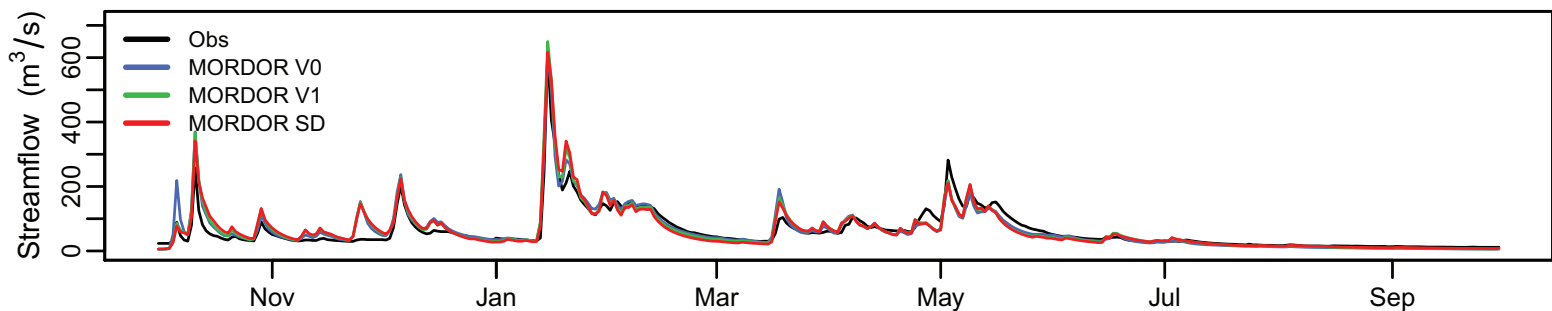

Year 1989

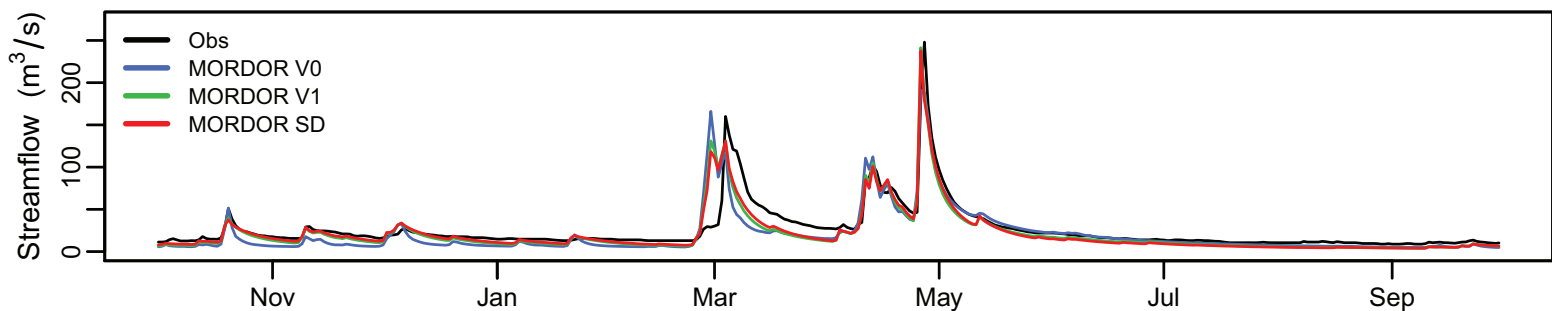

Year 1990

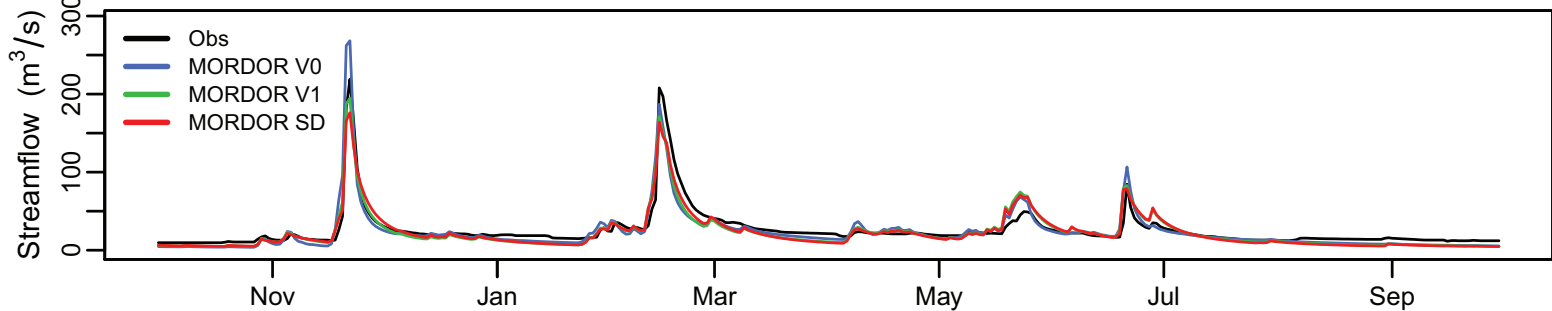

Year 1991

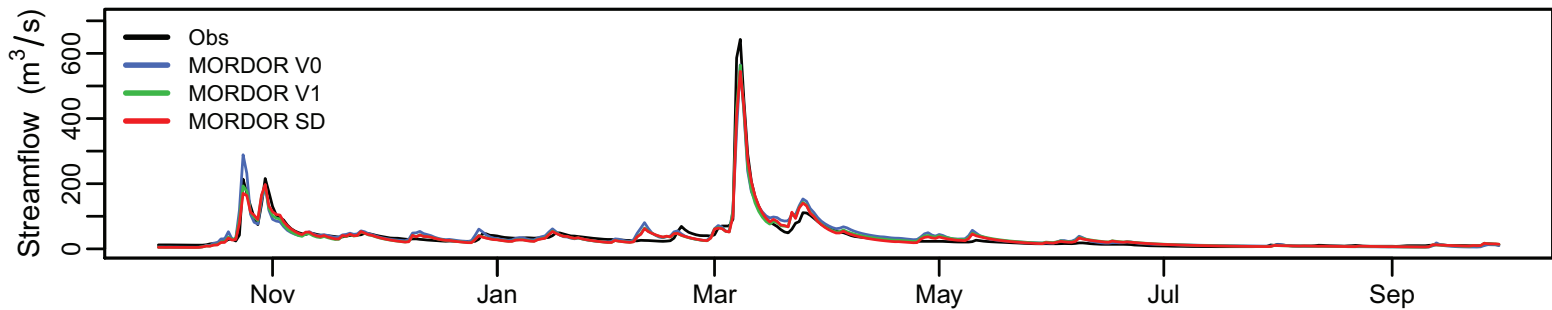

Year 1992

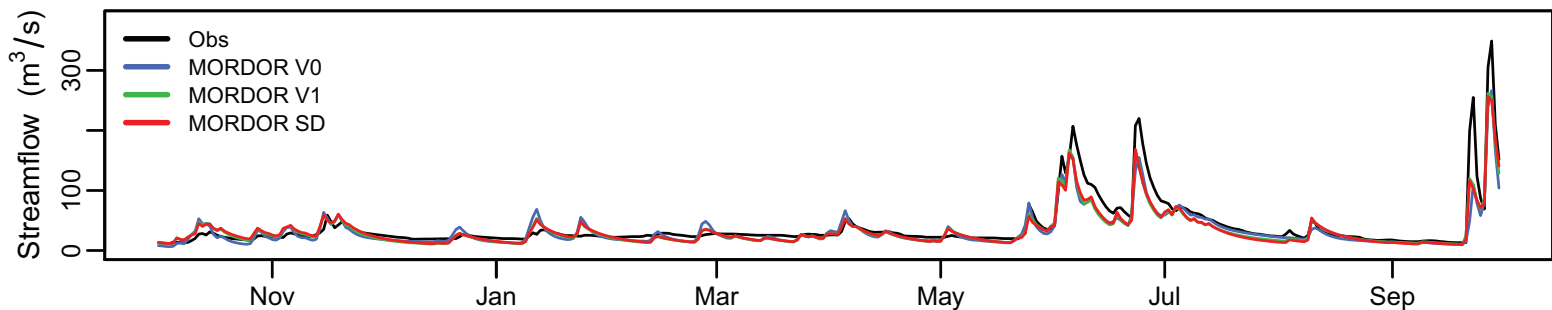

# Tarn@Millau

Year 1993

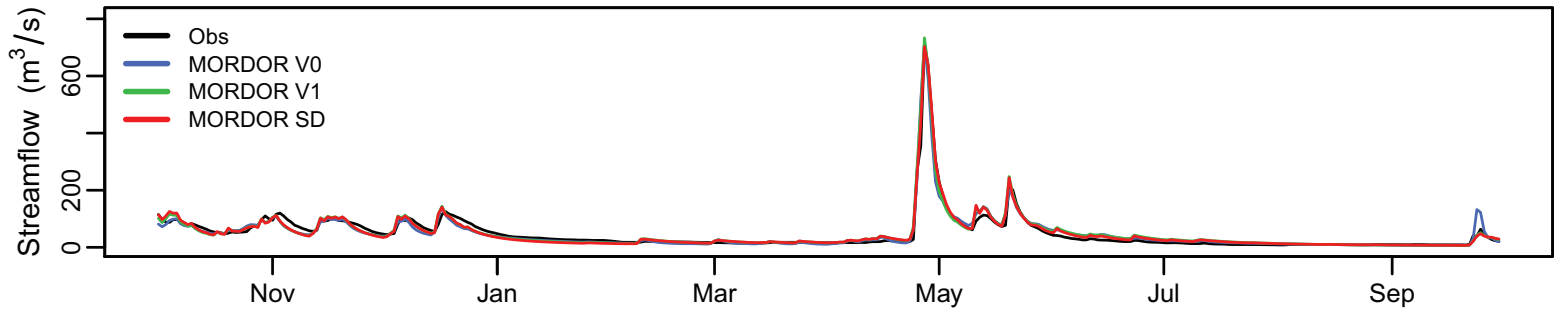

Year 1994

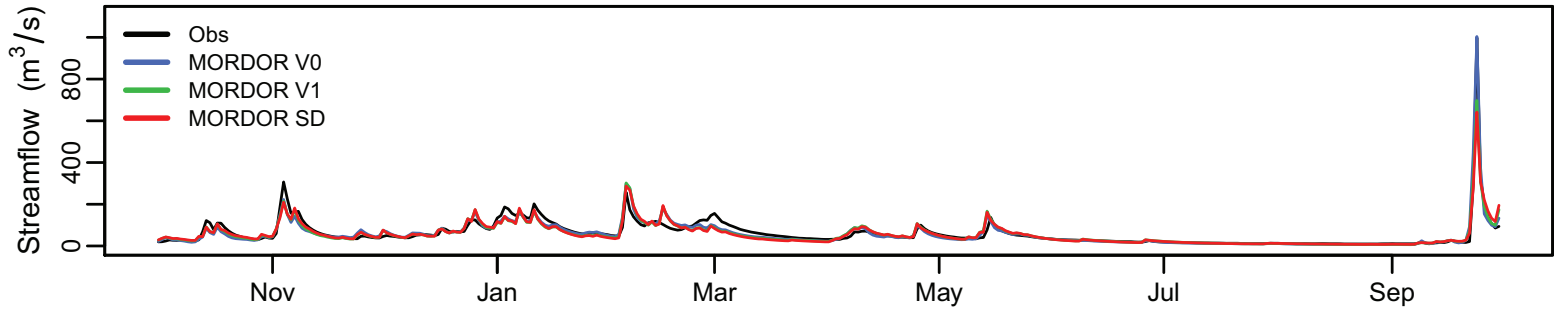

Year 1995

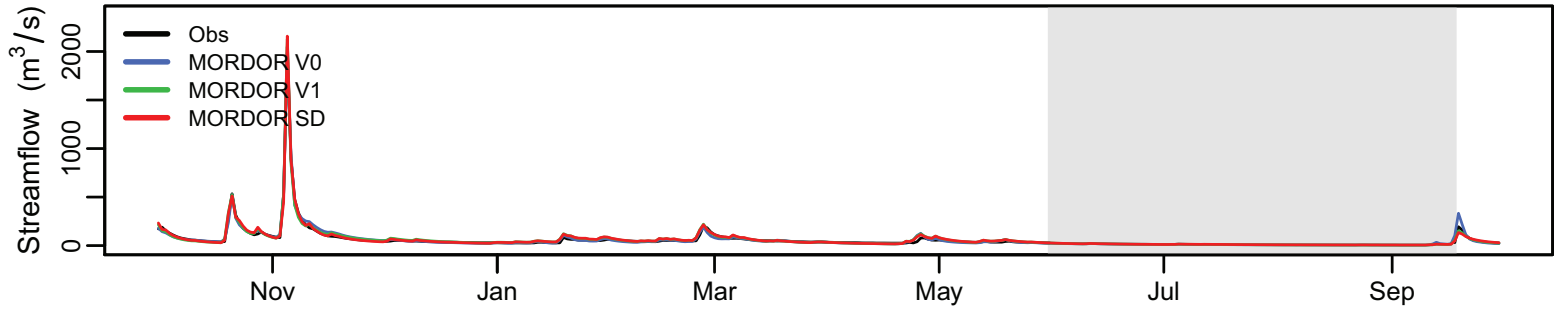

Year 1996

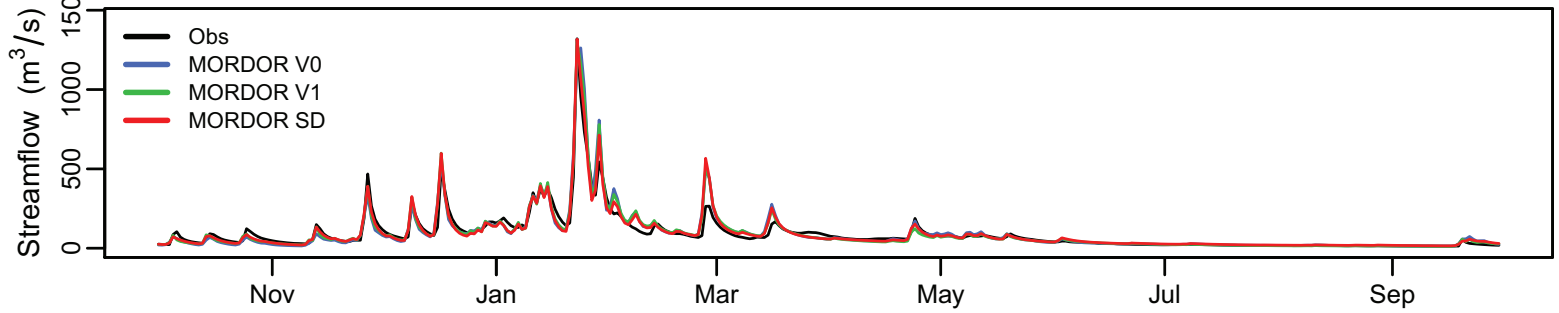

Year 1997

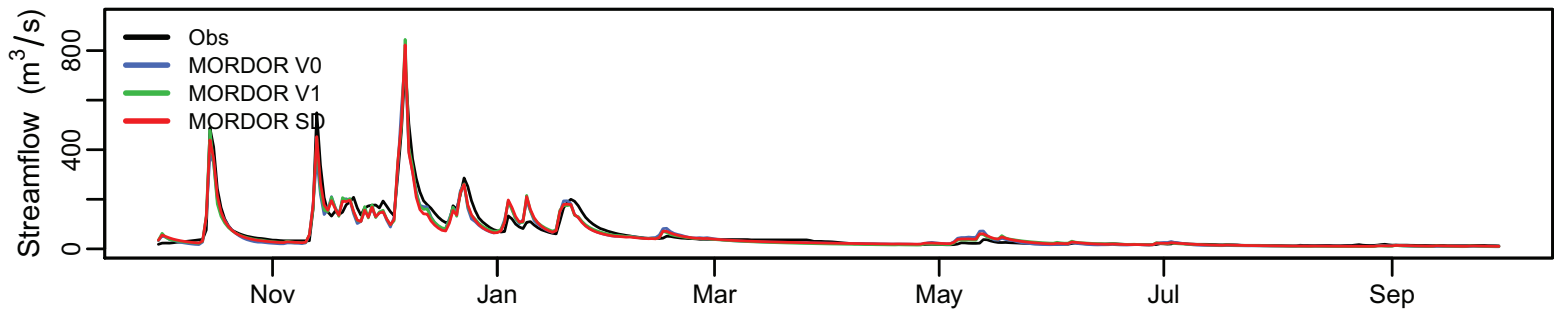

Year 1998

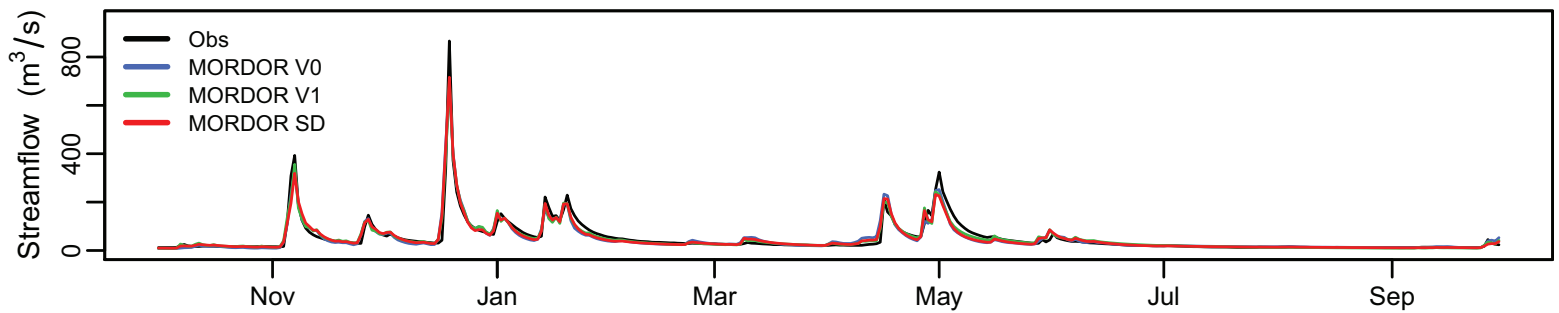

# Tarn@Millau

Year 1999

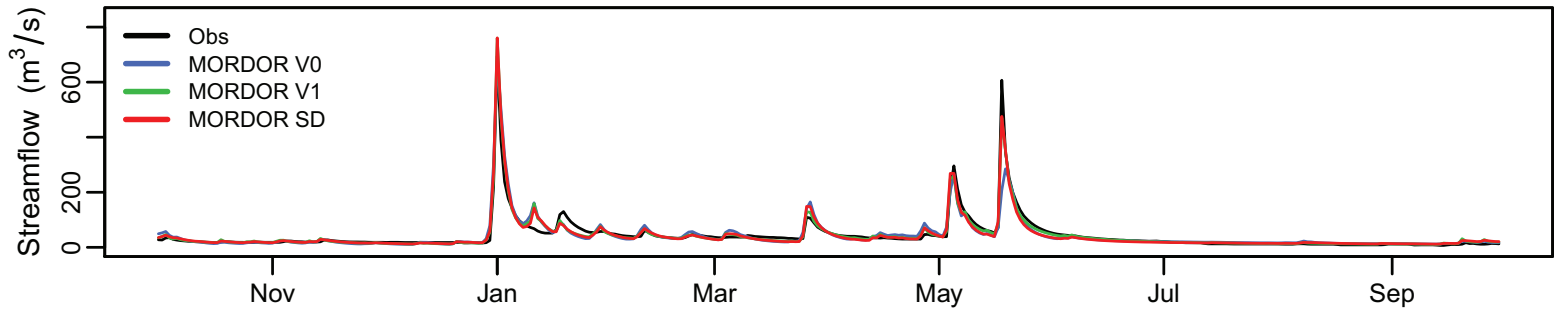

Year 2000

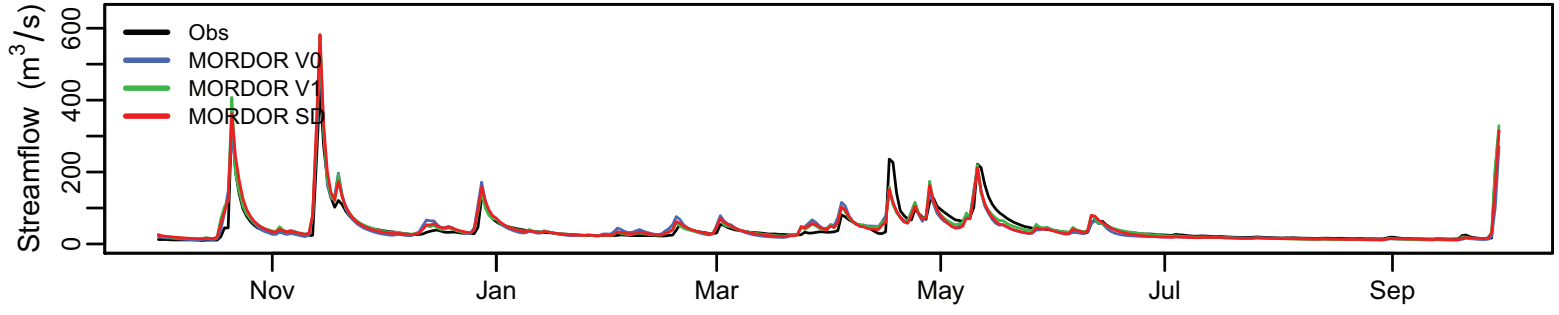

Year 2001

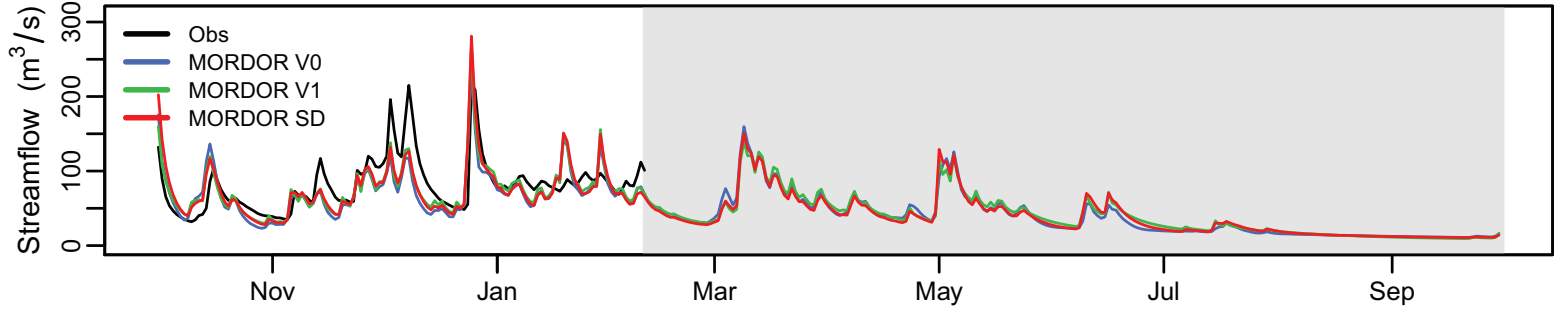

Year 2002

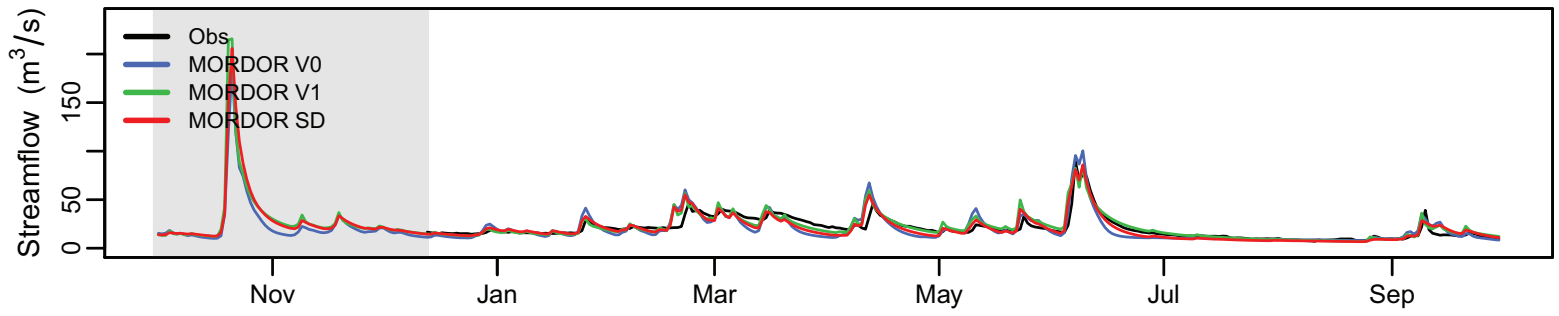

Year 2003

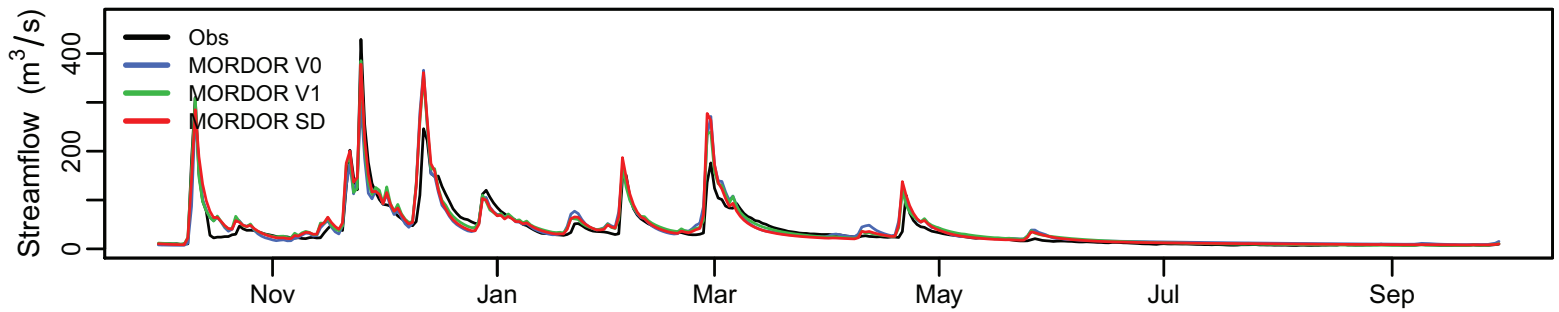

Year 2004

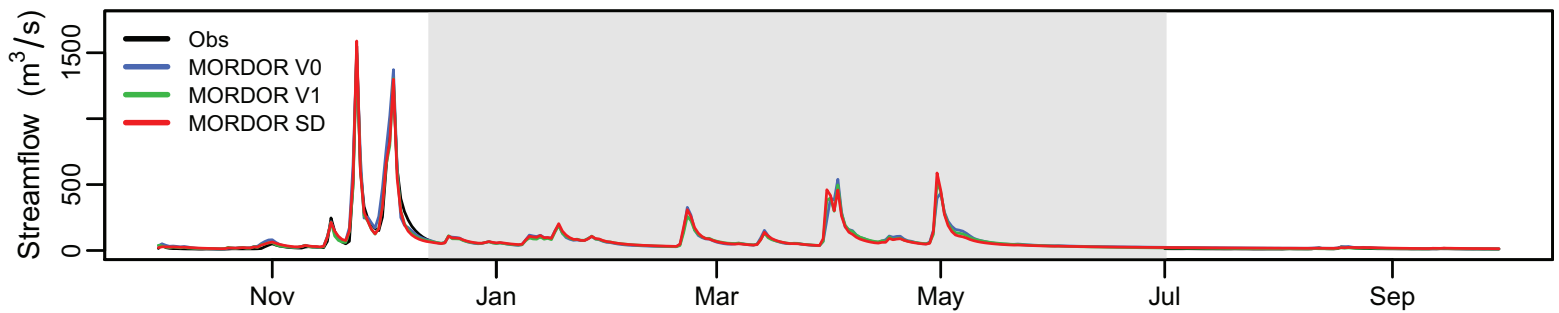



# Tarn@Millau

Year 2005

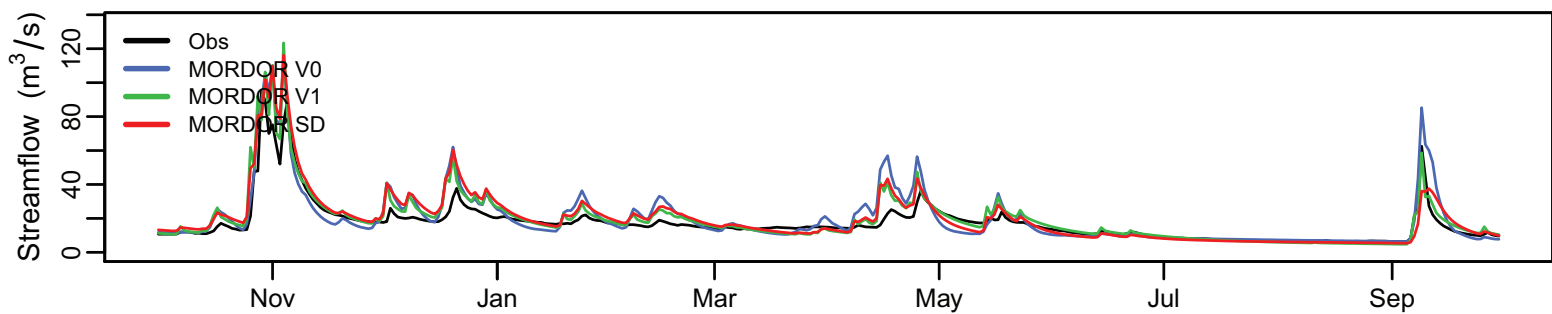

Year 2006

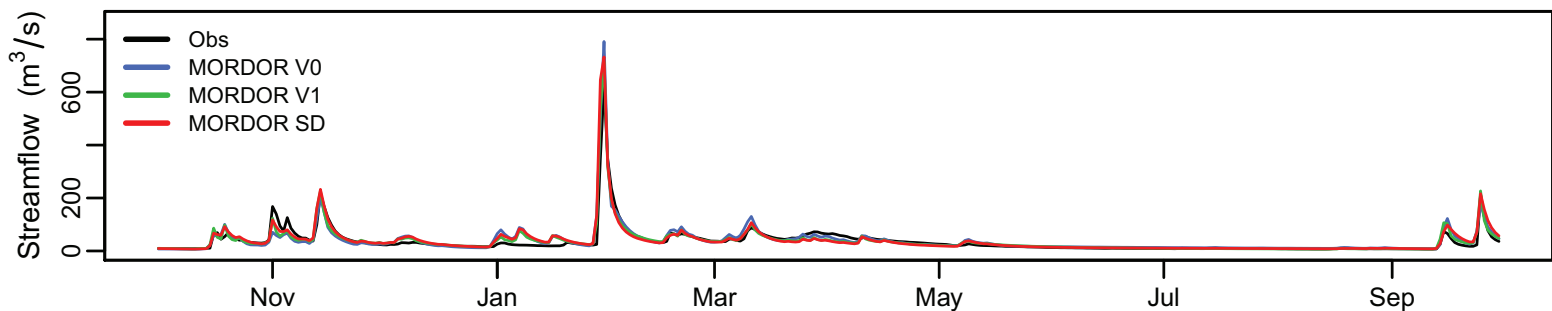

Year 2007

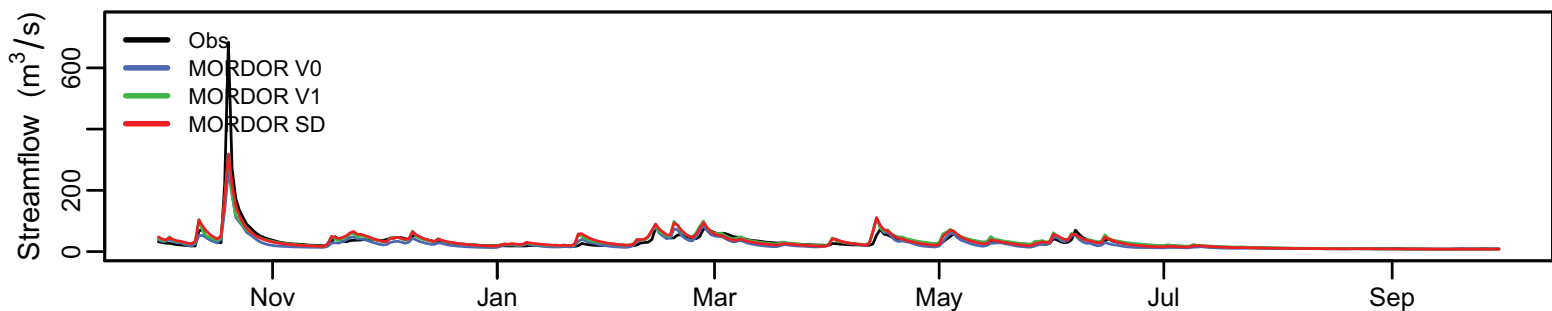

Year 2008

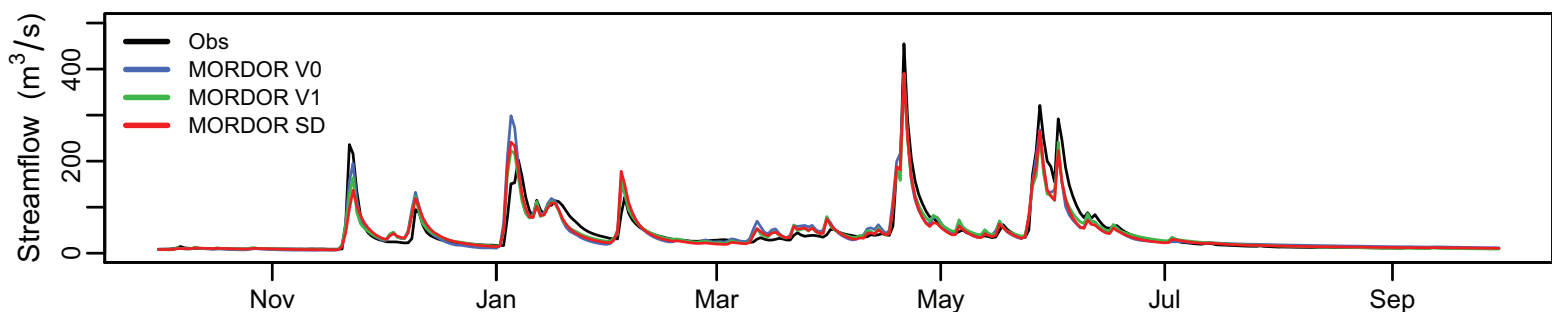

Year 2009

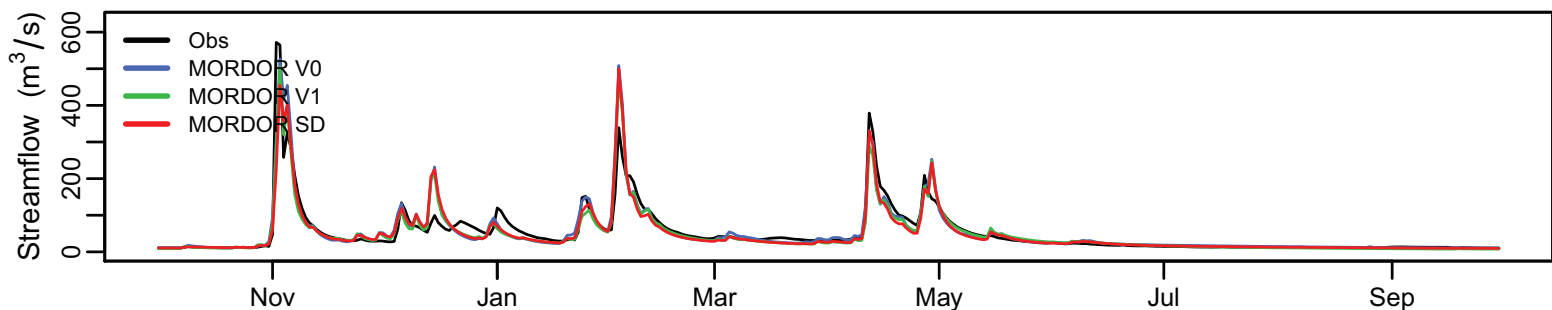

Year 2010

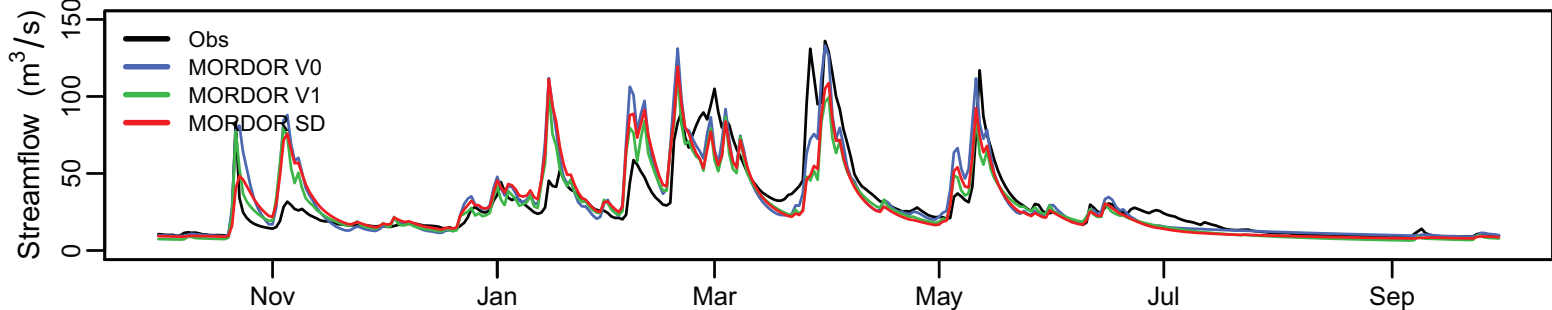

# Tarn@Montbrun

Year 1986

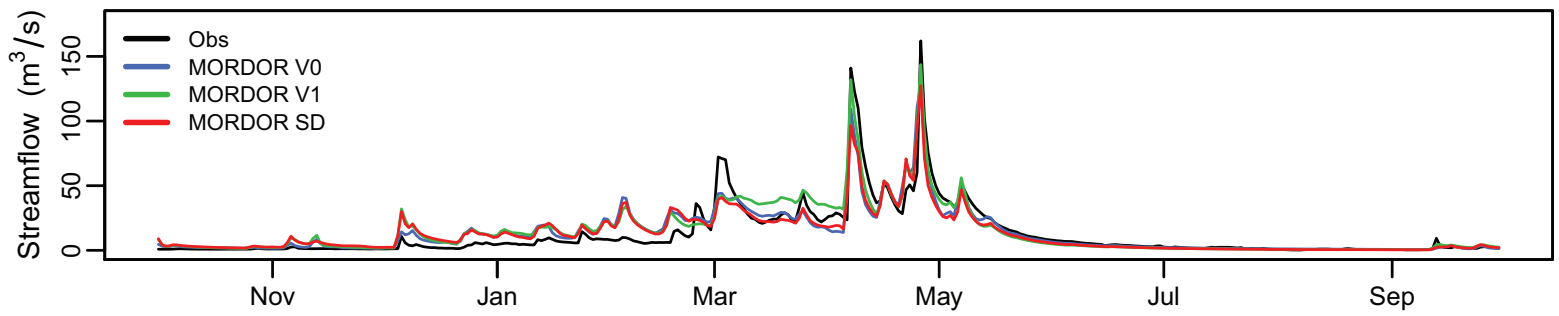

Year 1987

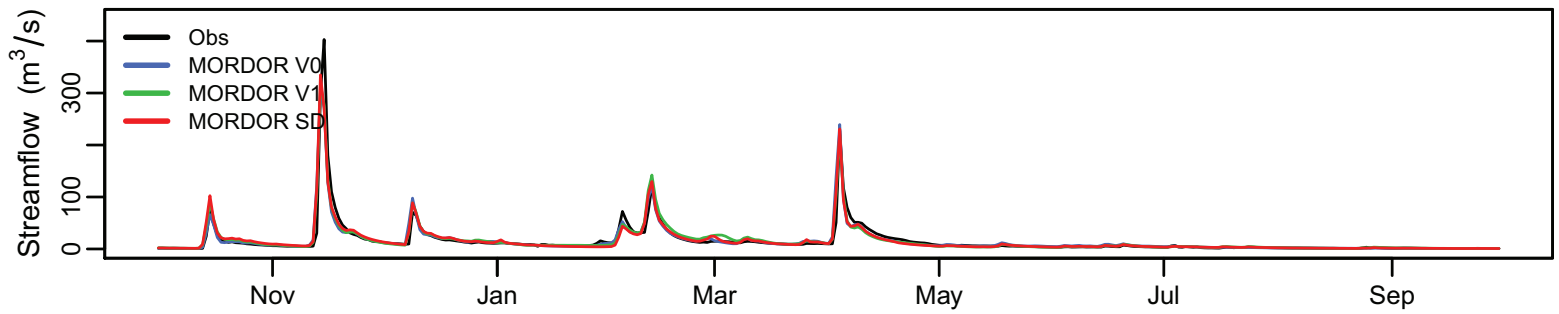

Year 1988

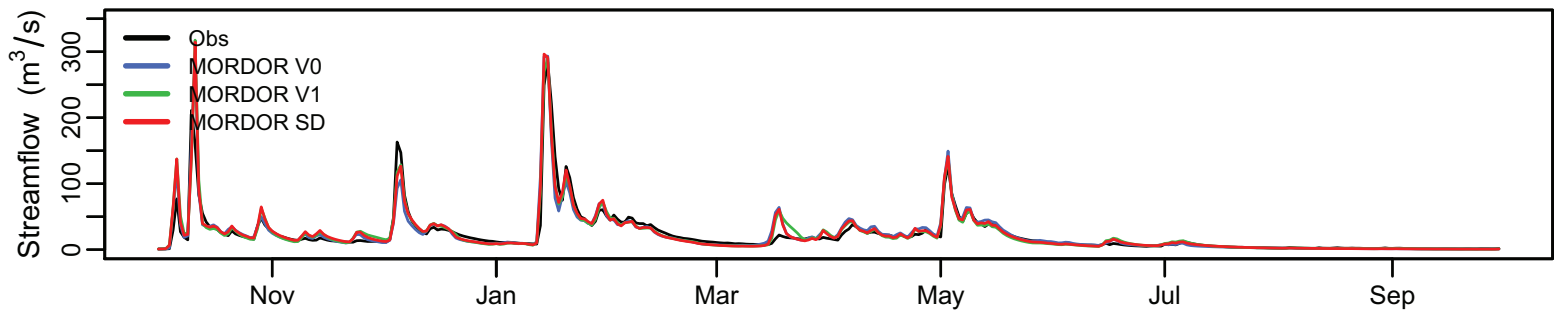

Year 1989

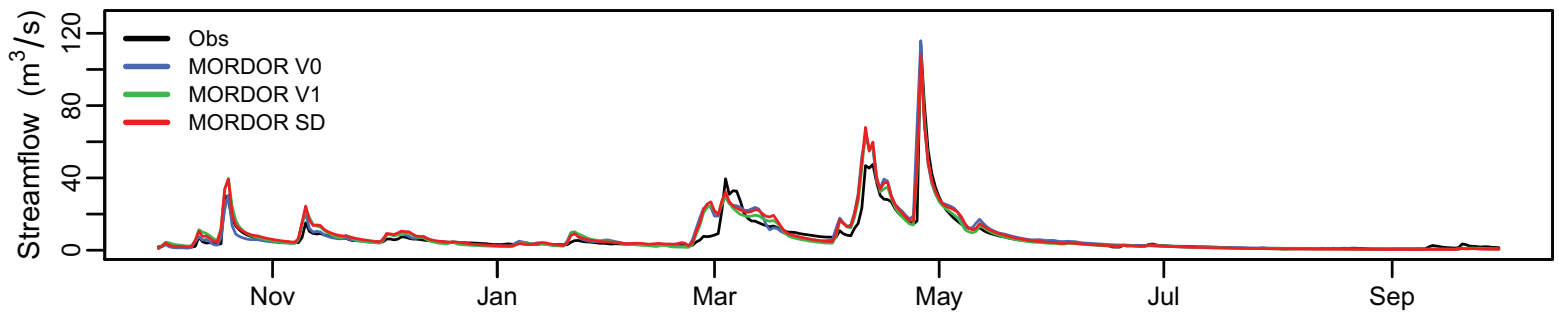

Year 1990

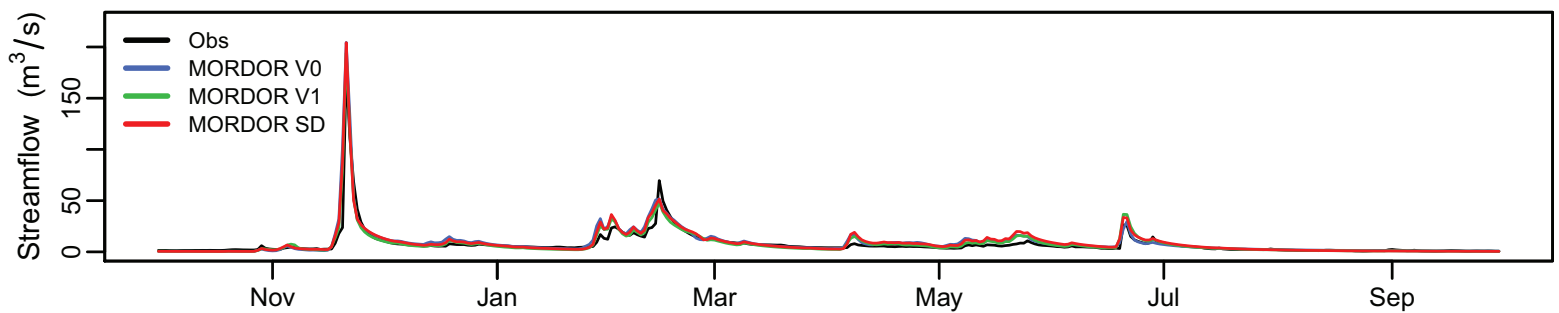

Year 1991

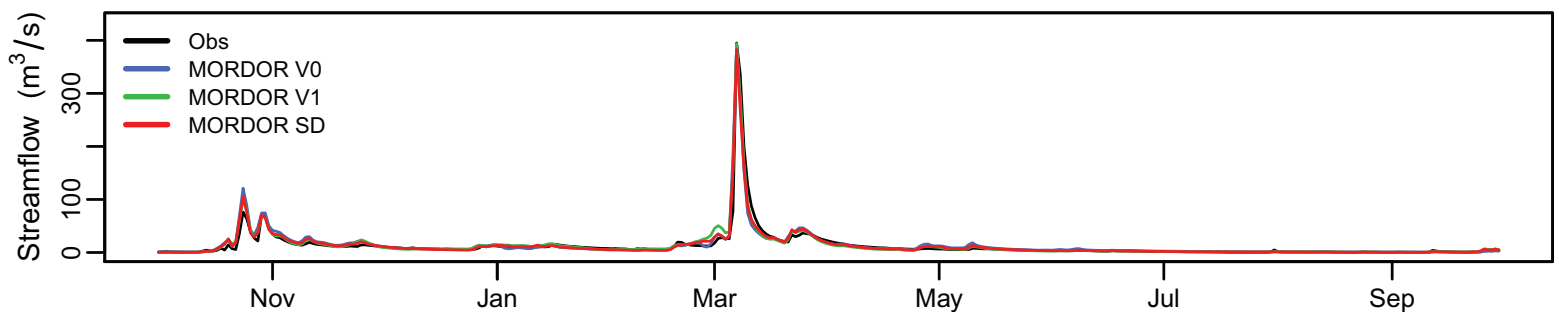

# Tarn@Montbrun

Year 1992

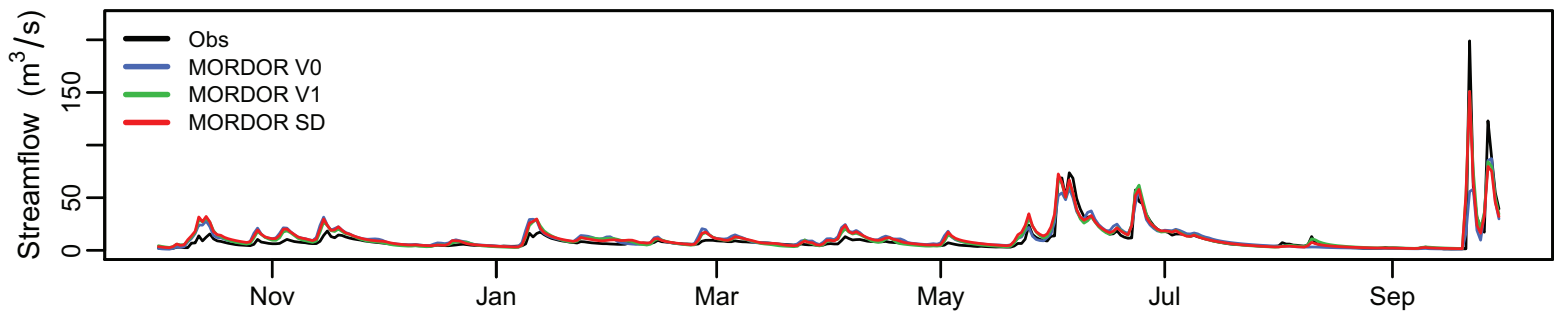

Year 1993

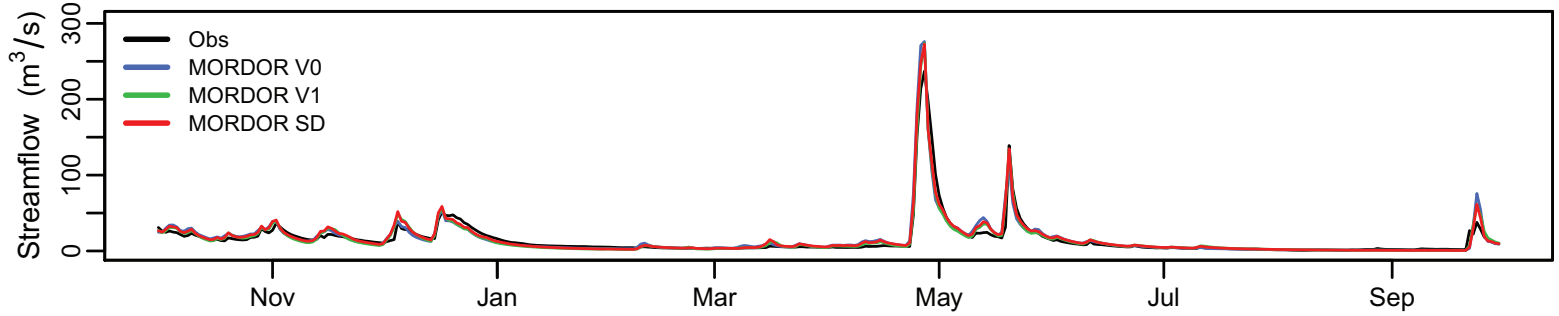

Year 1994

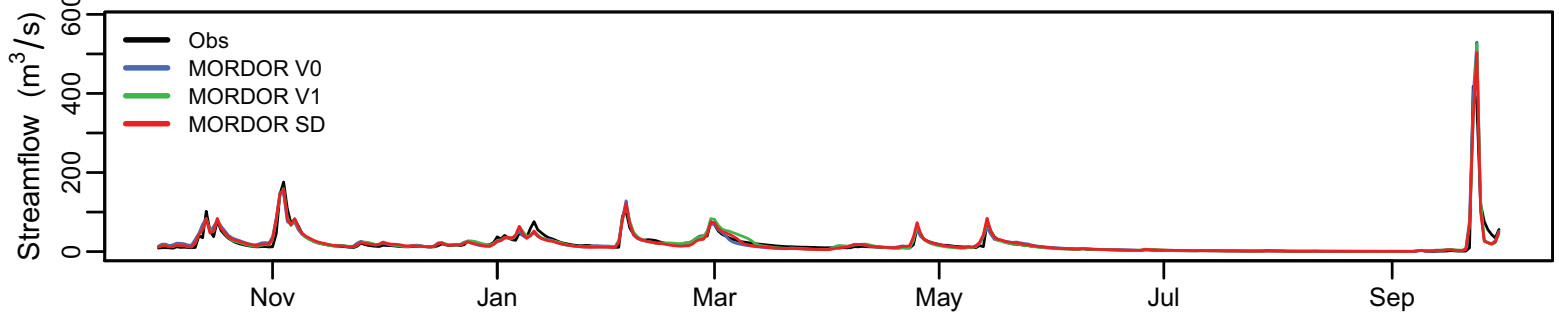

Year 1995

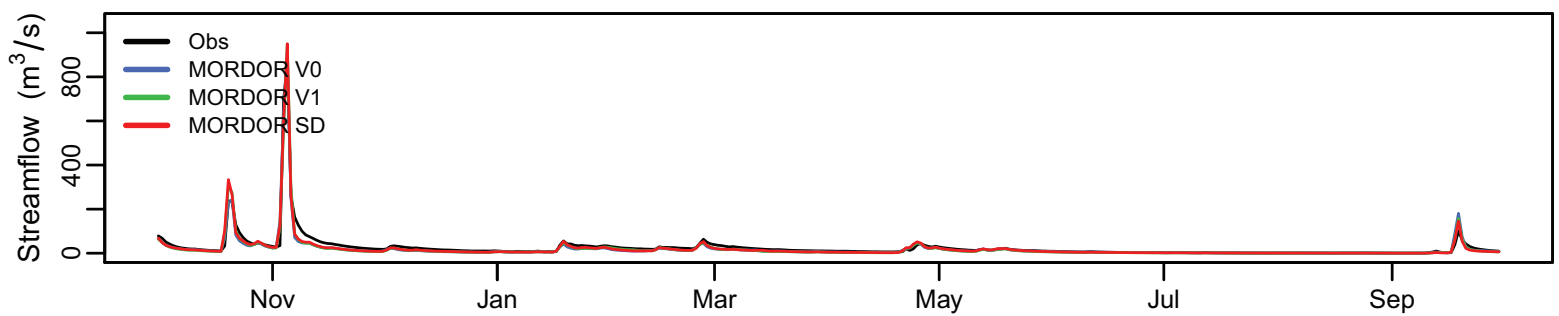

Year 1996

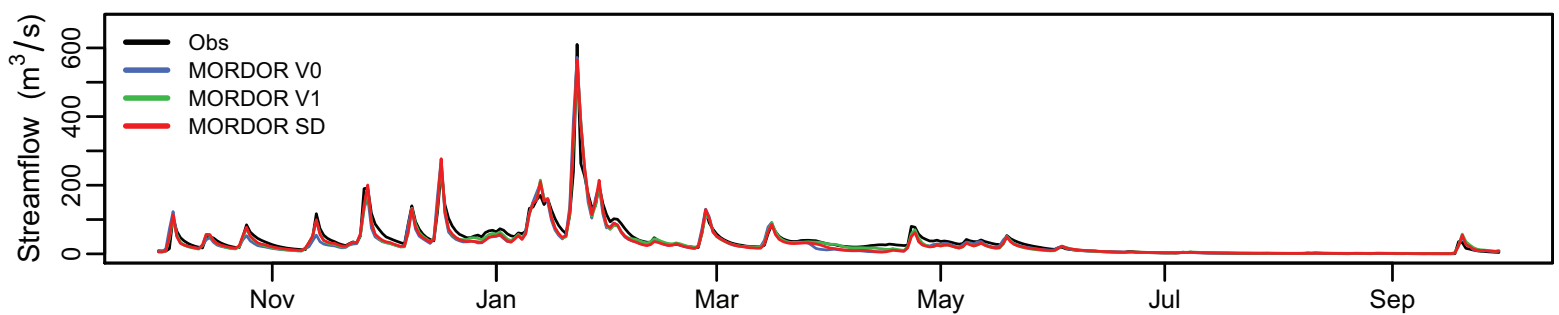

Year 1997

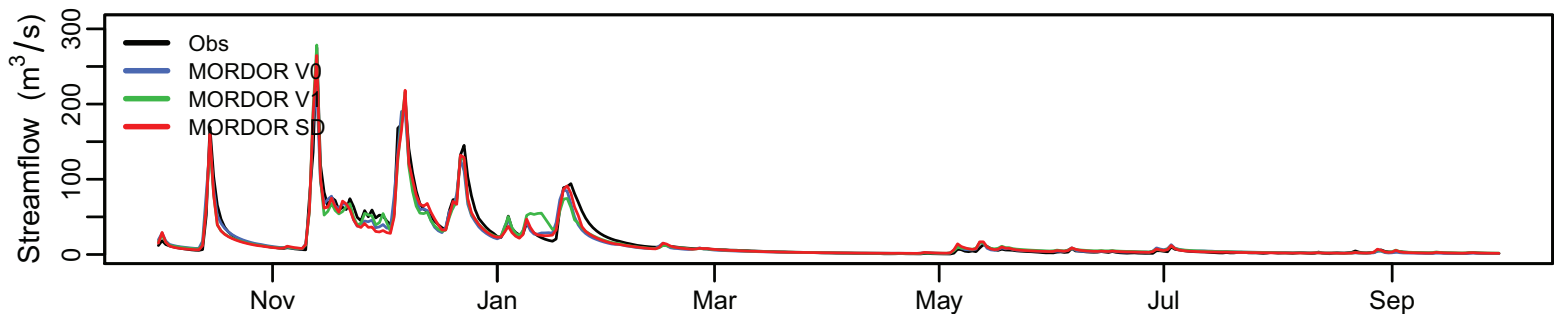

# Tarn@Montbrun

Year 1998

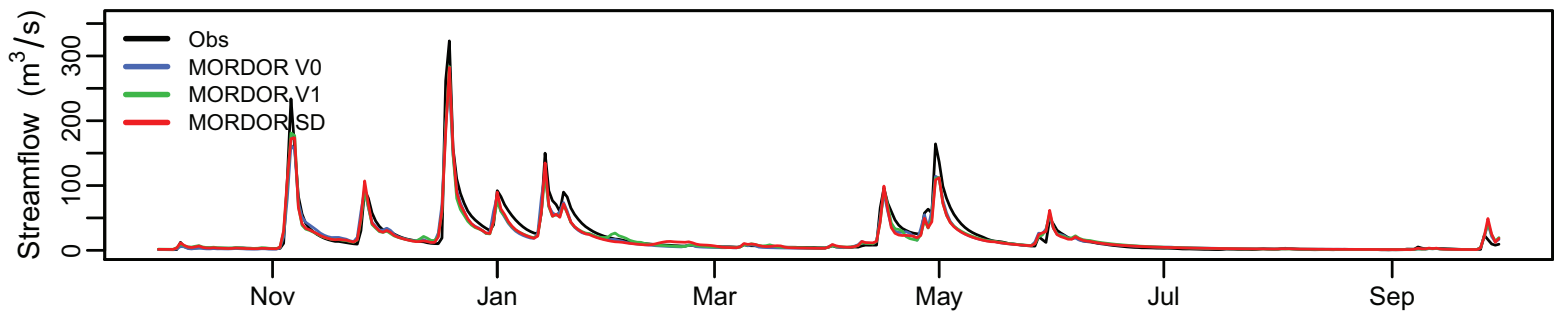

Year 1999

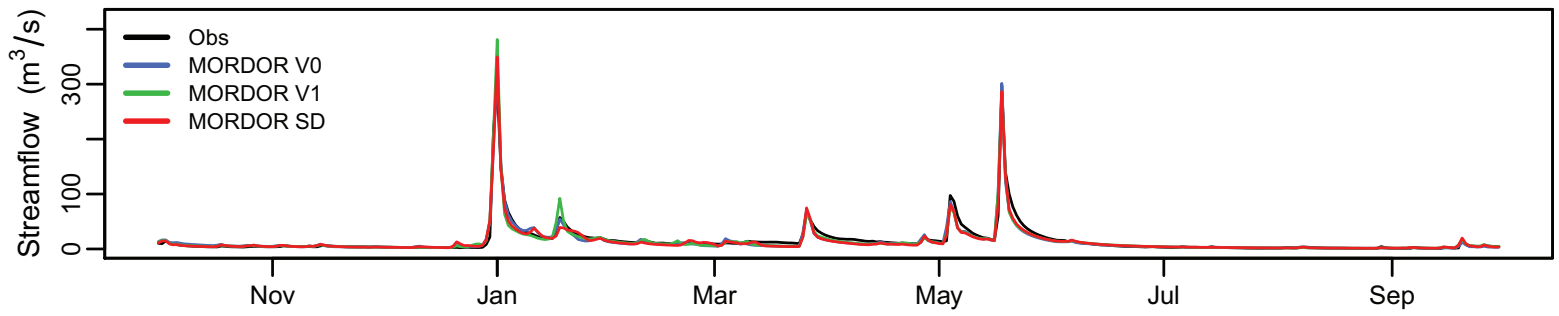

Year 2000

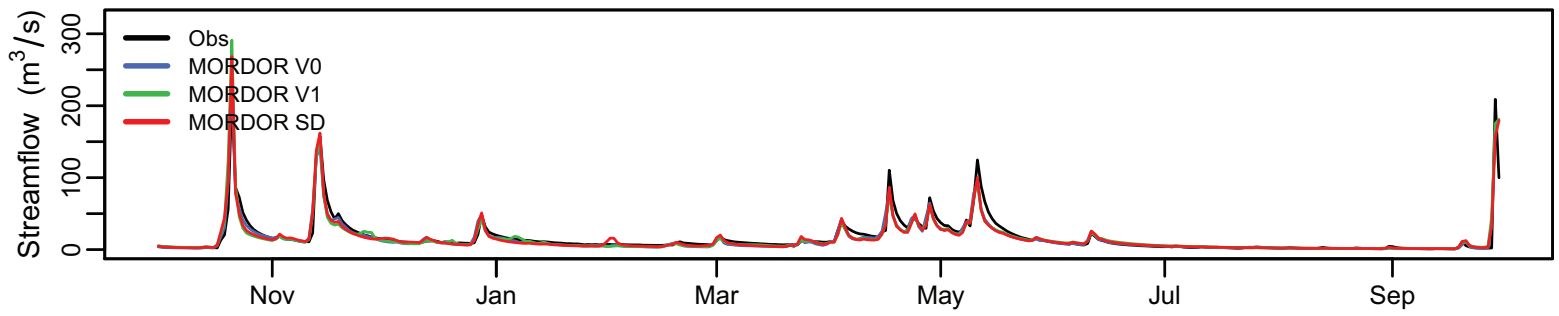

Year 2001

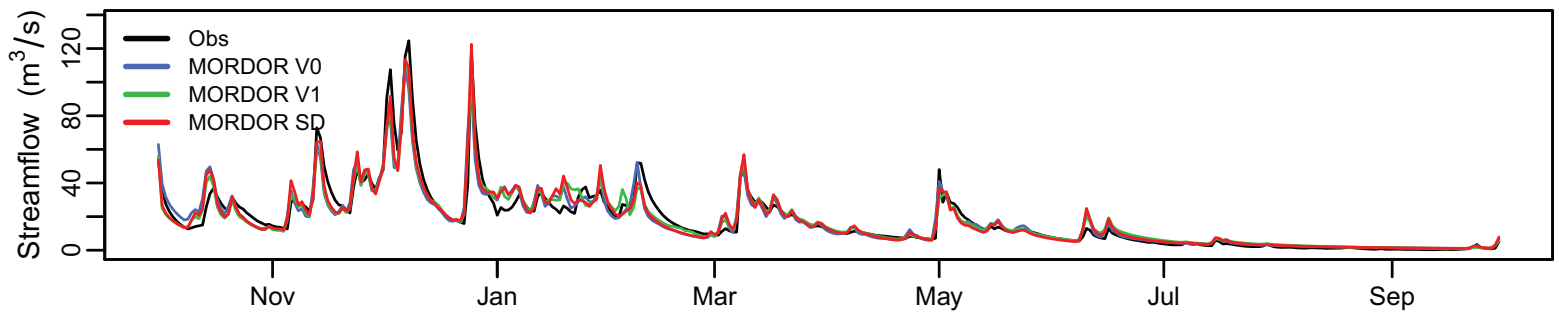

Year 2002

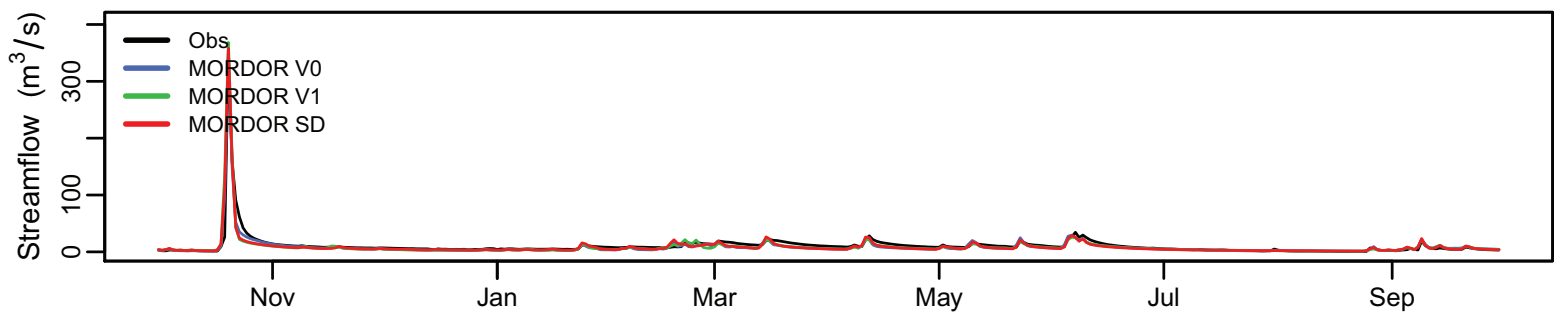

Year 2003

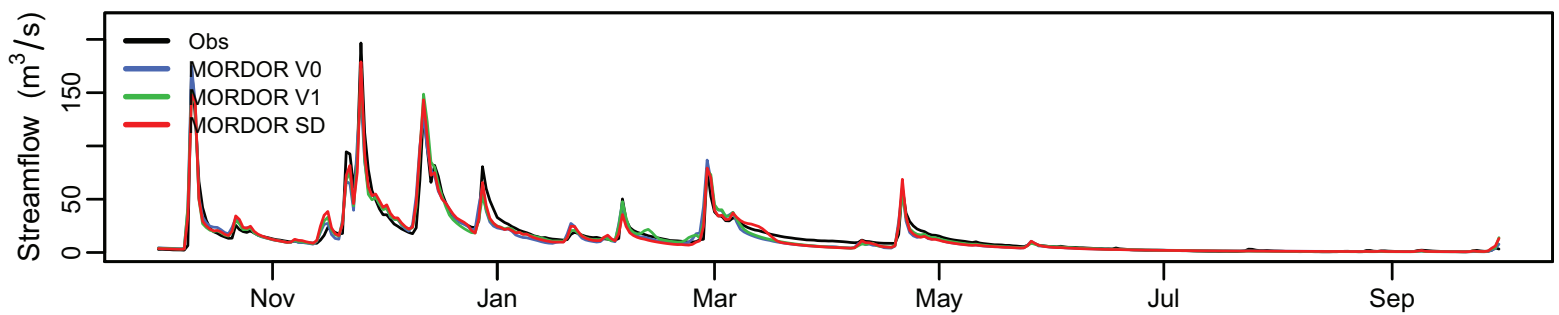

# Tarn@Montbrun

Year 2004

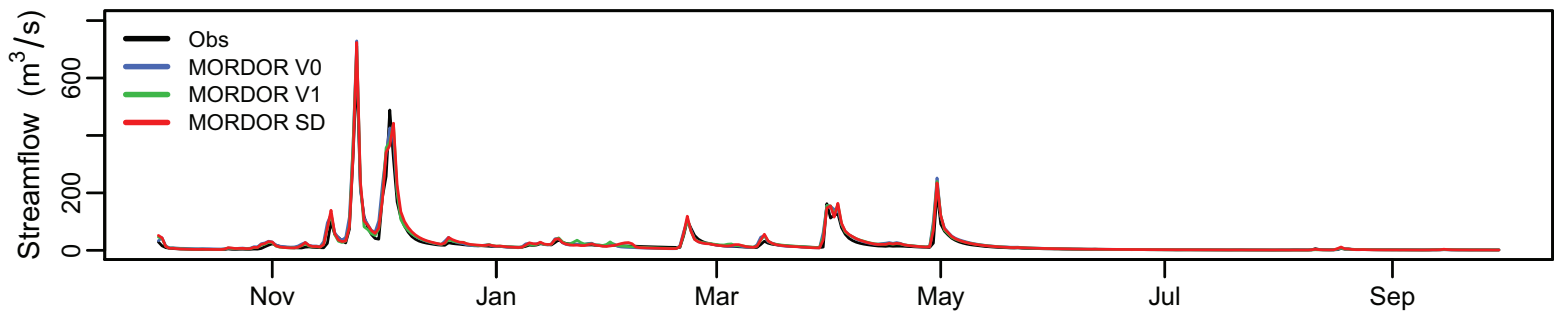

Year 2005

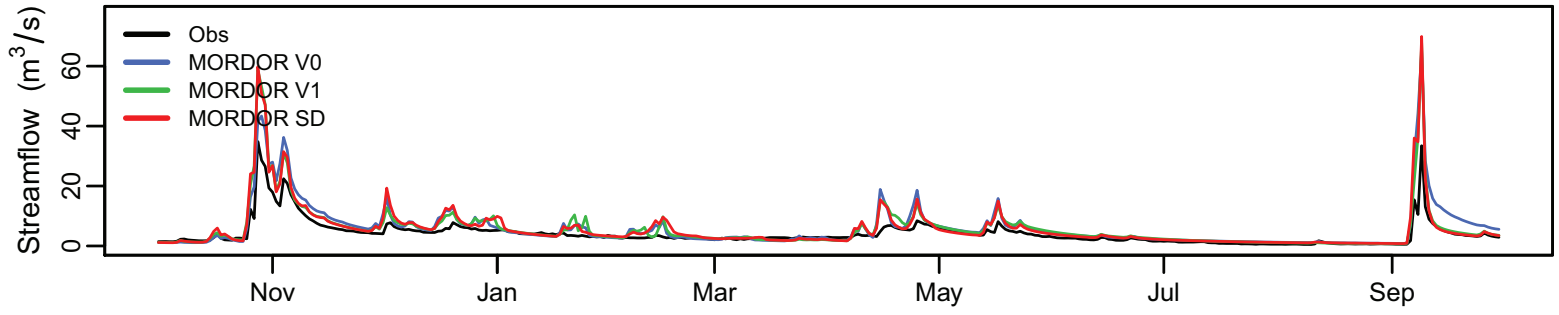

Year 2006

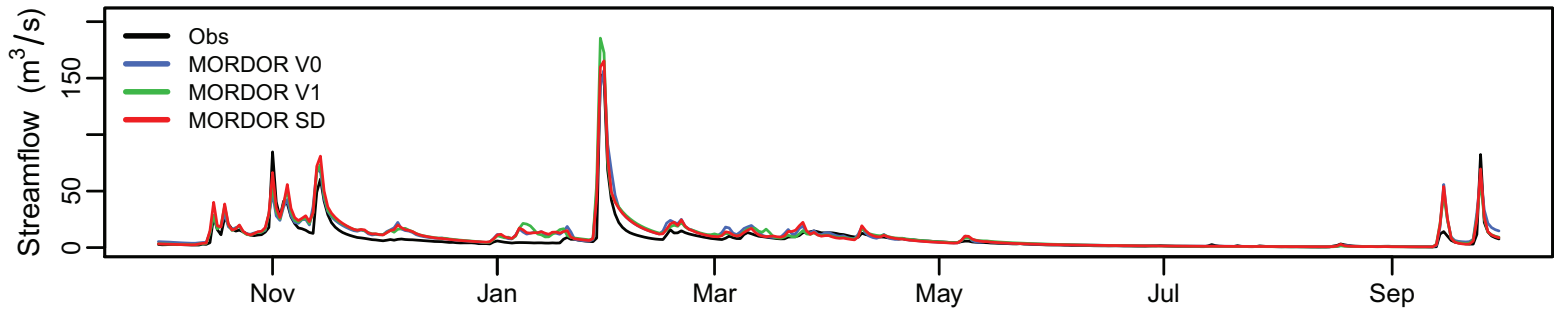

# Tarn@Pinet

Year 1981

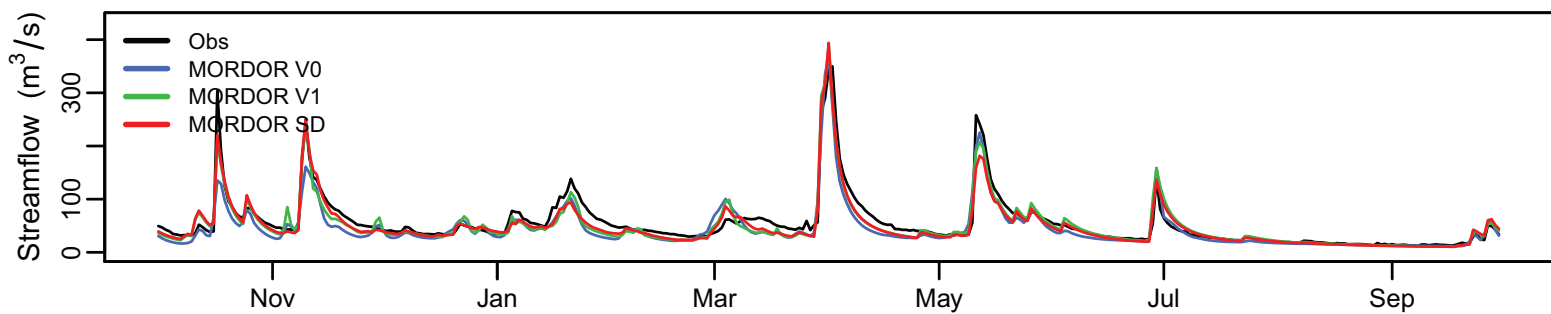

Year 1982

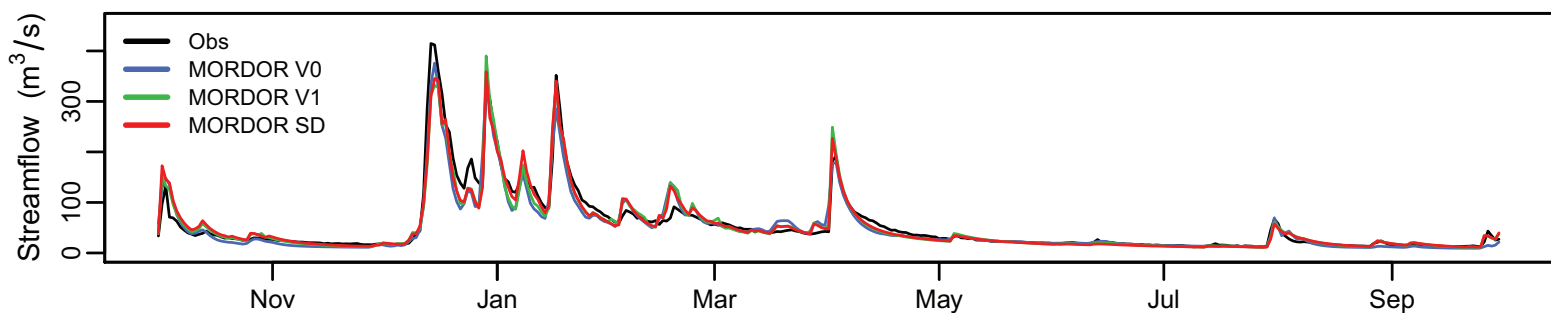

Year 1983

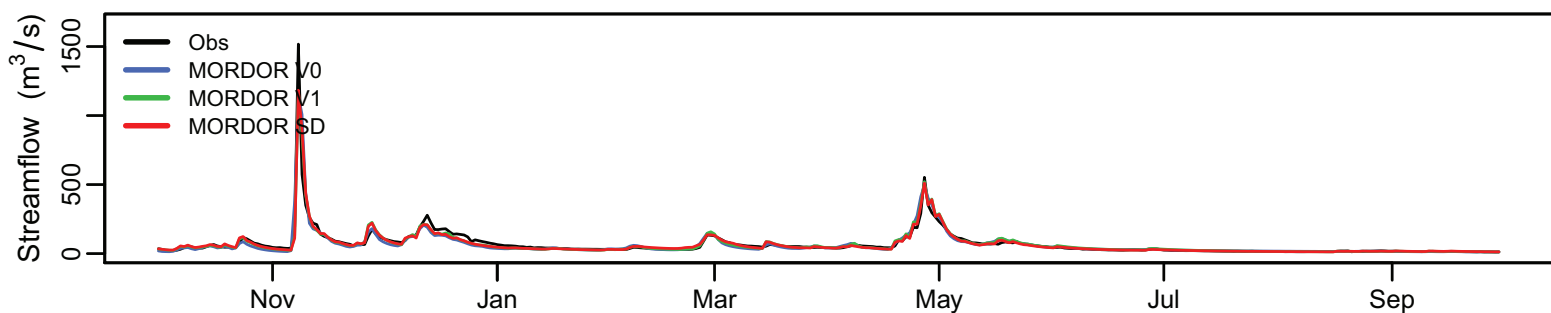

Year 1984

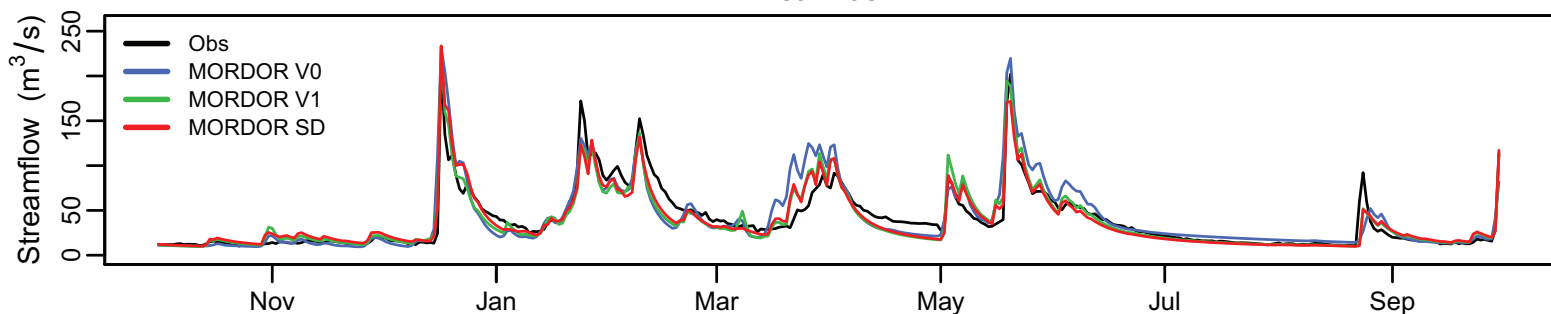

Year 1985

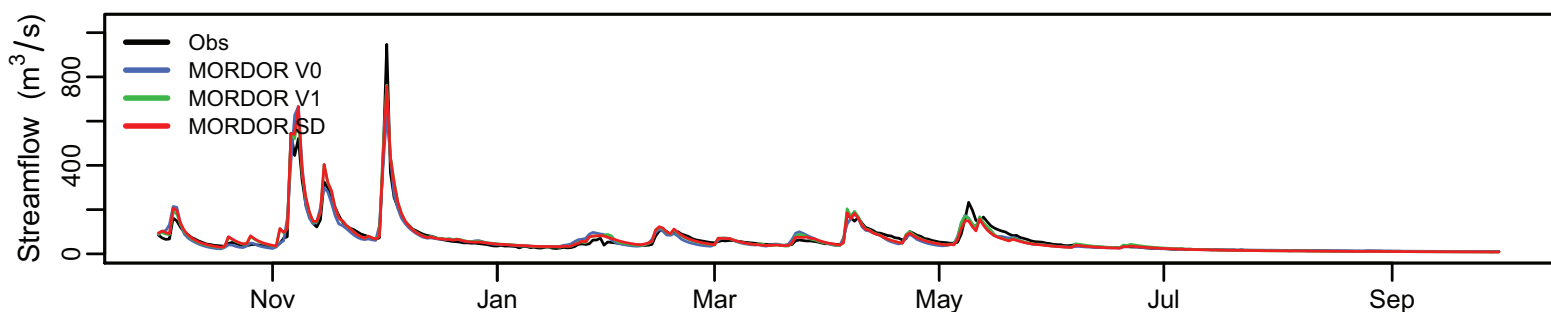

Year 1986

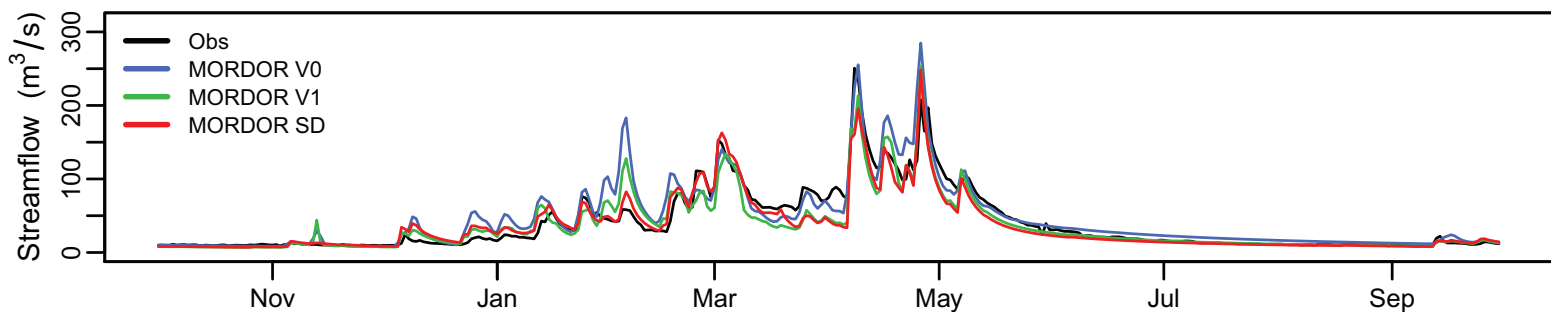

# Tarn@Pinet

Year 1987

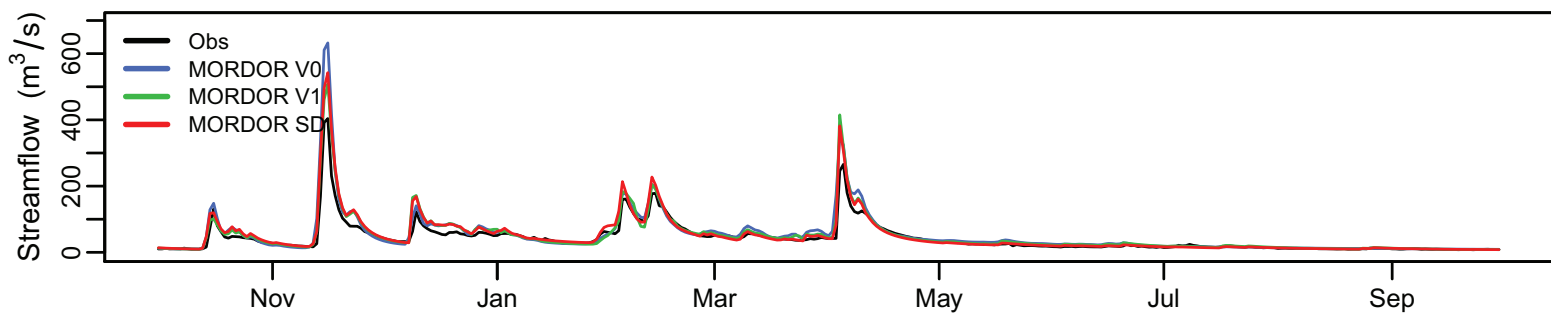

Year 1988

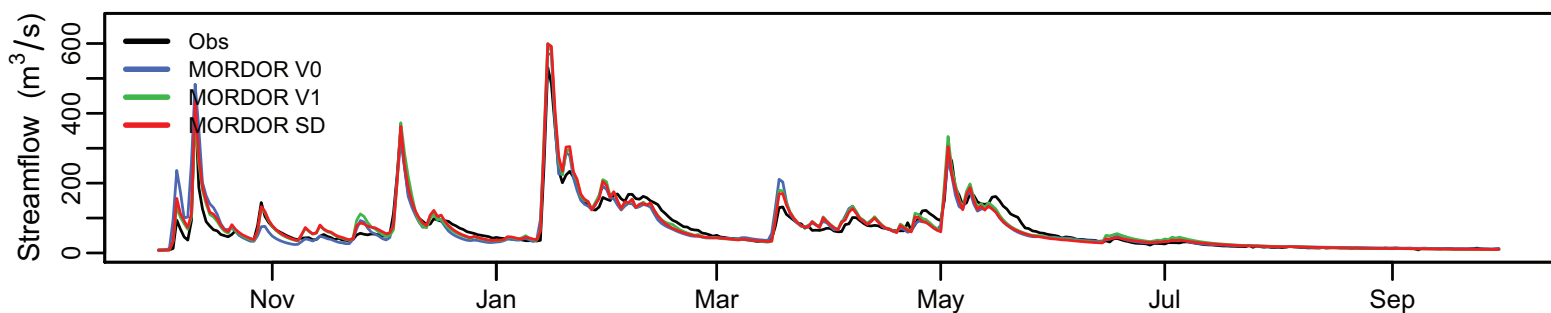

Year 1989

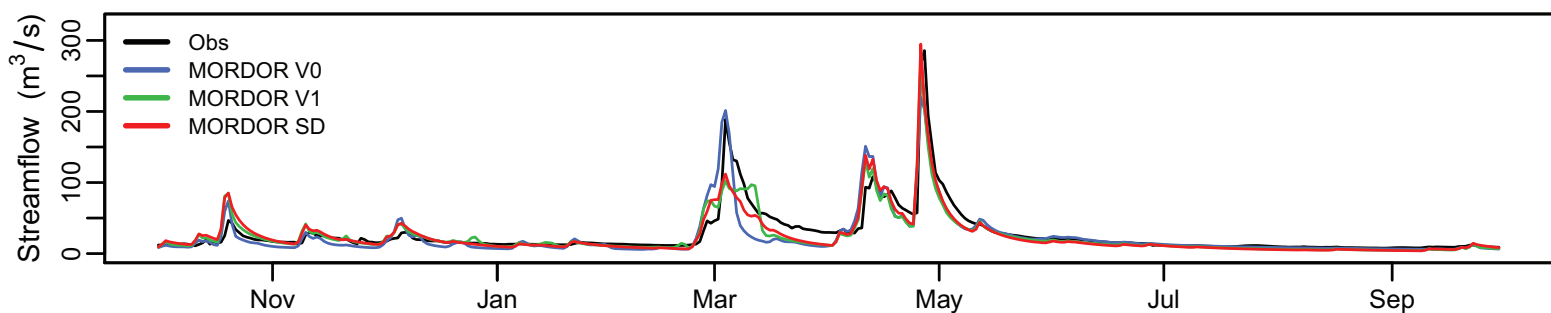

Year 1990

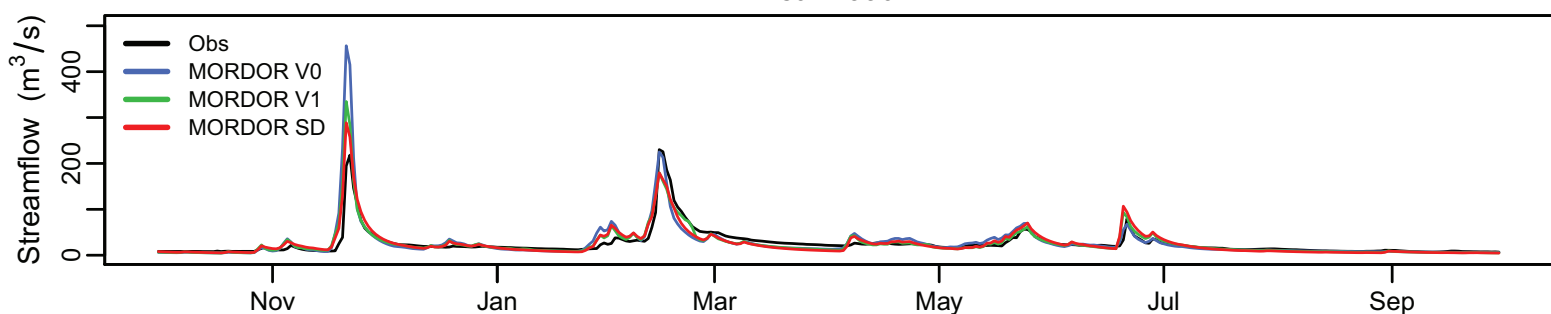

Year 1991

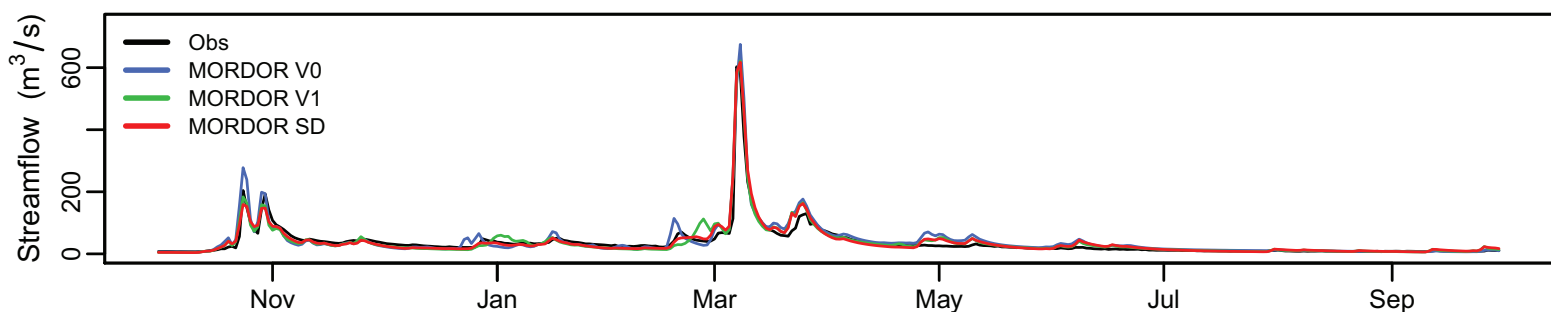

Year 1992

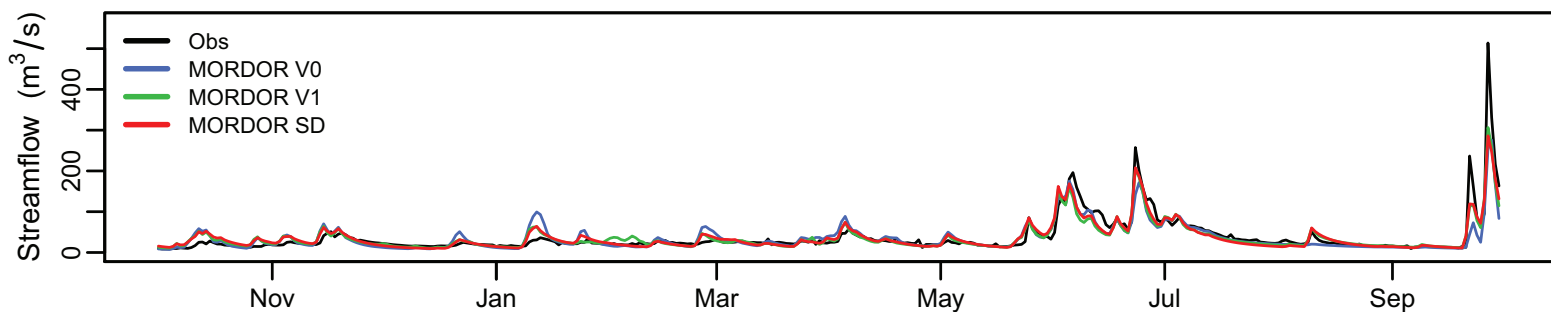

# Tarn@Pinet

Year 1993

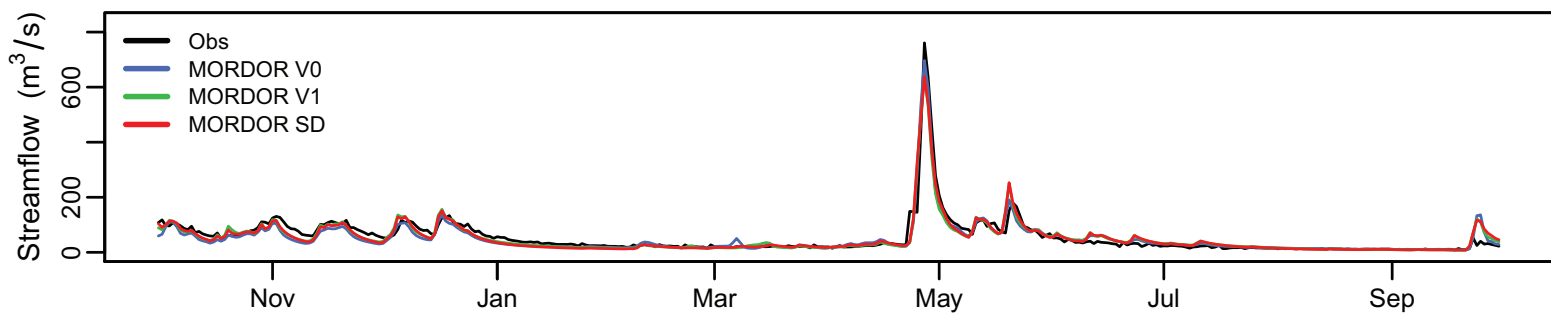

Year 1994

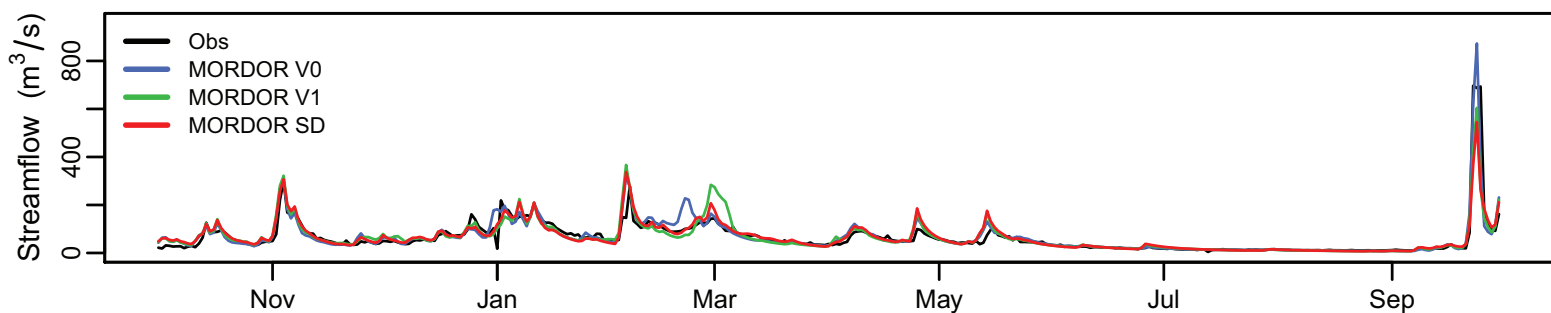

Year 1995

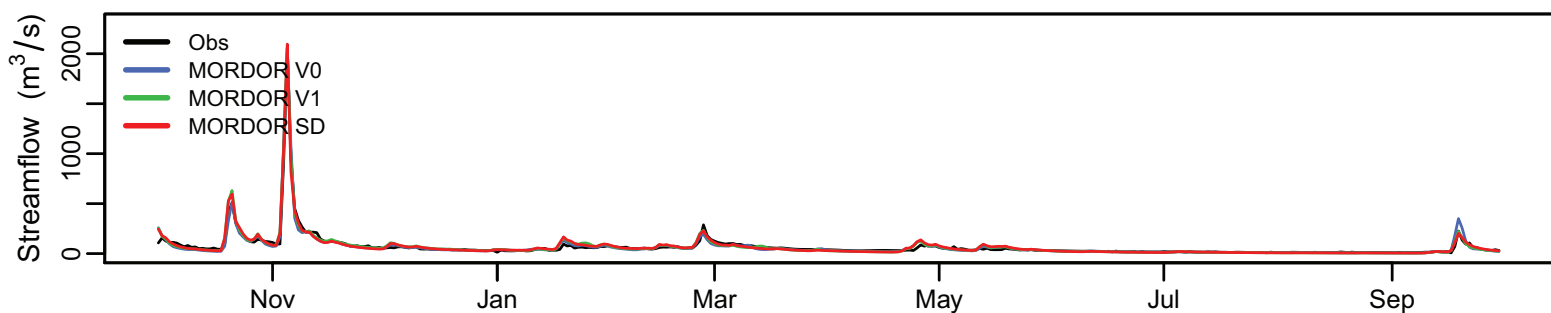



# Tarnon@Florac

Year 1986

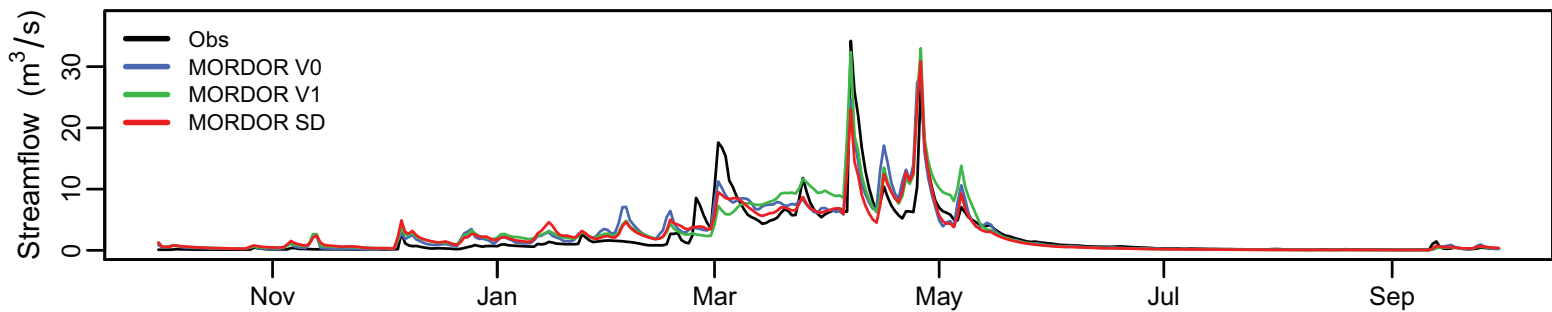

Year 1987

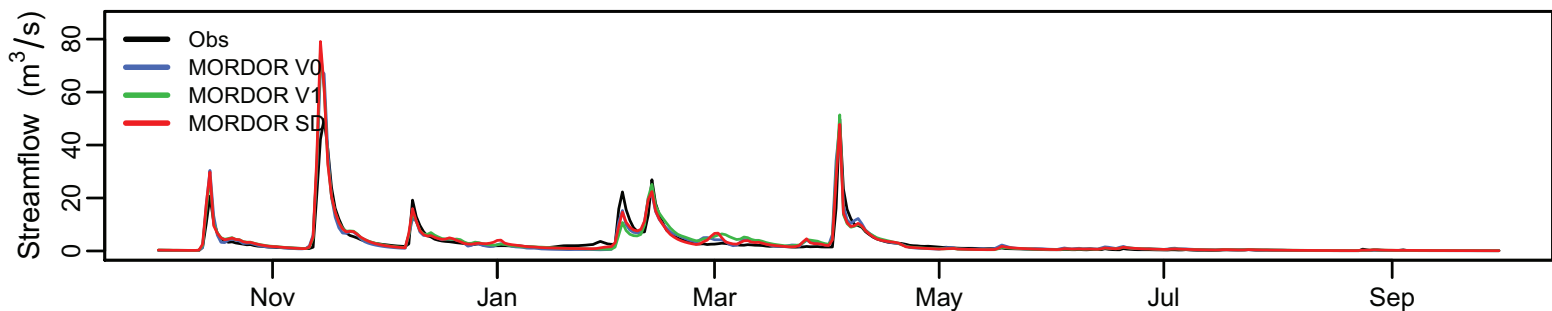

Year 1988

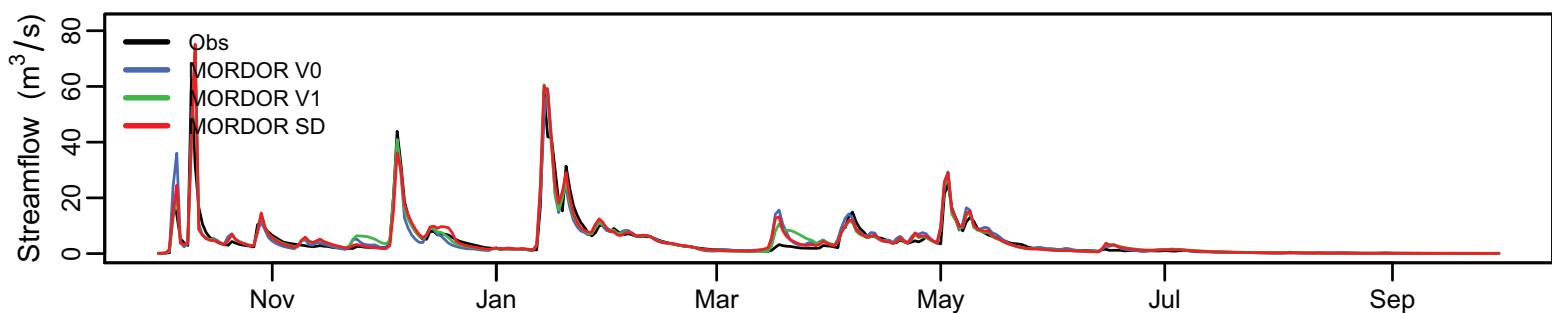

Year 1989

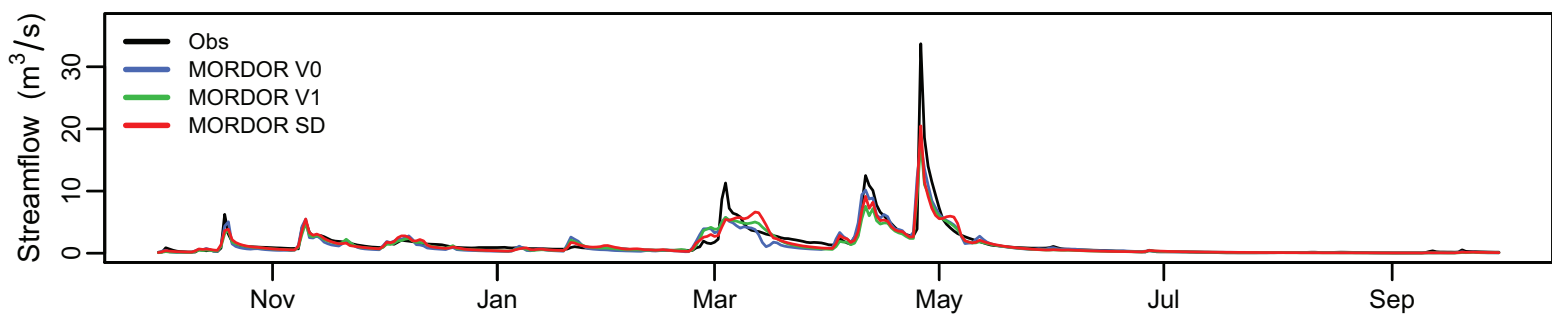

Year 1990

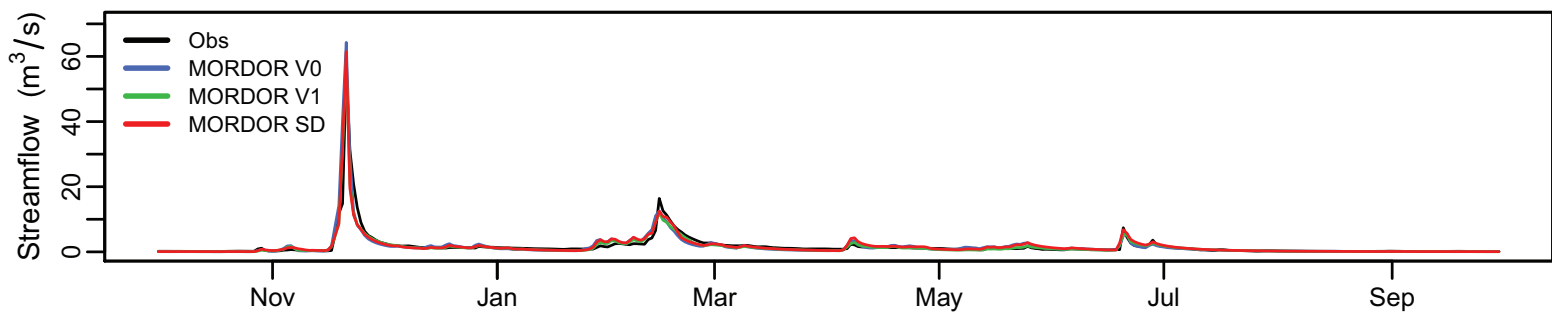

Year 1991

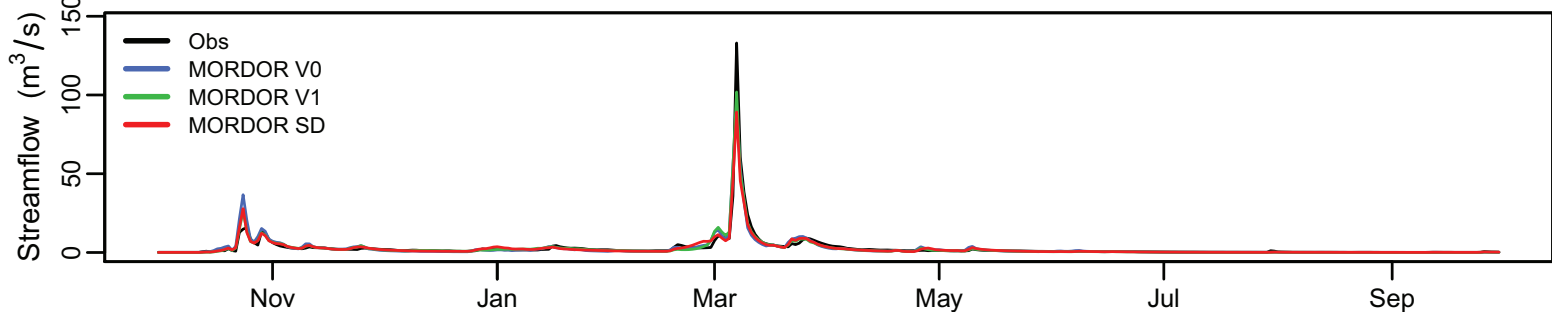

# Tarnon@Florac

Year 1992

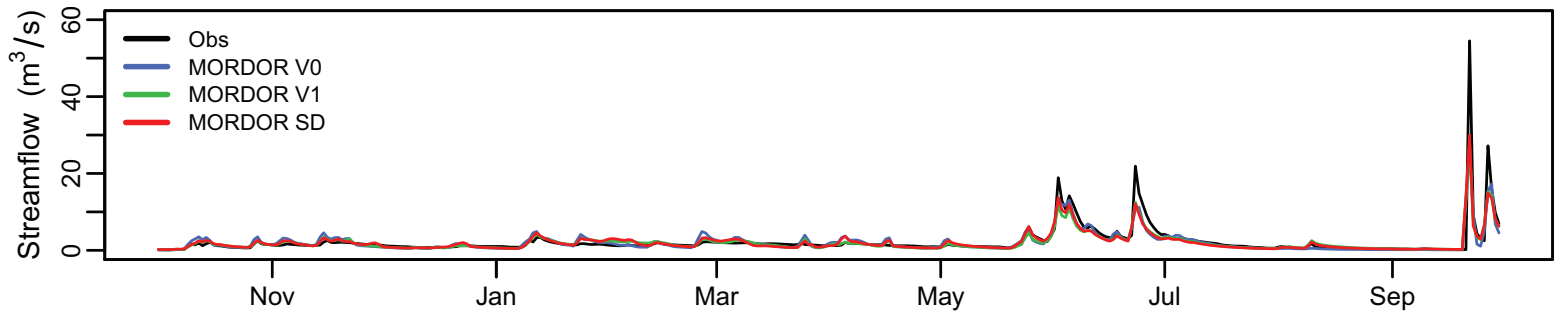

Year 1993

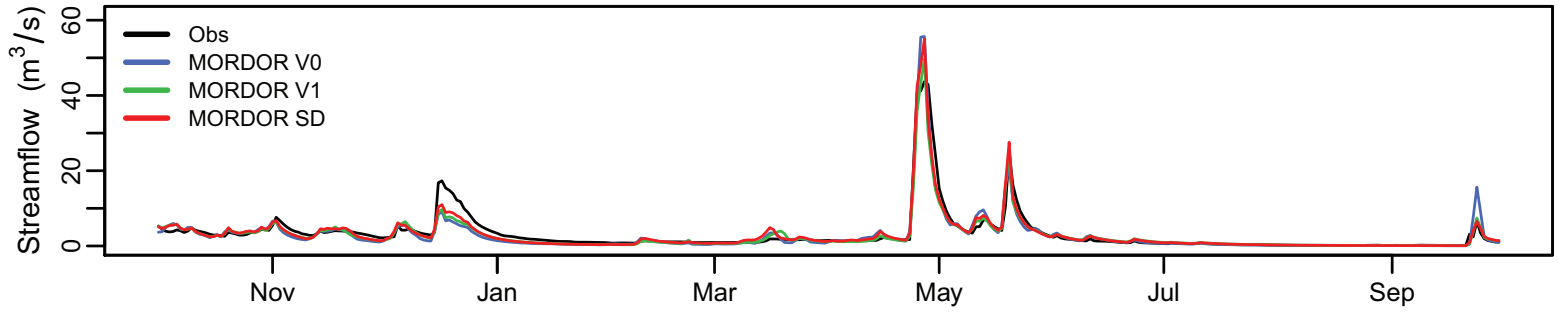

Year 1994

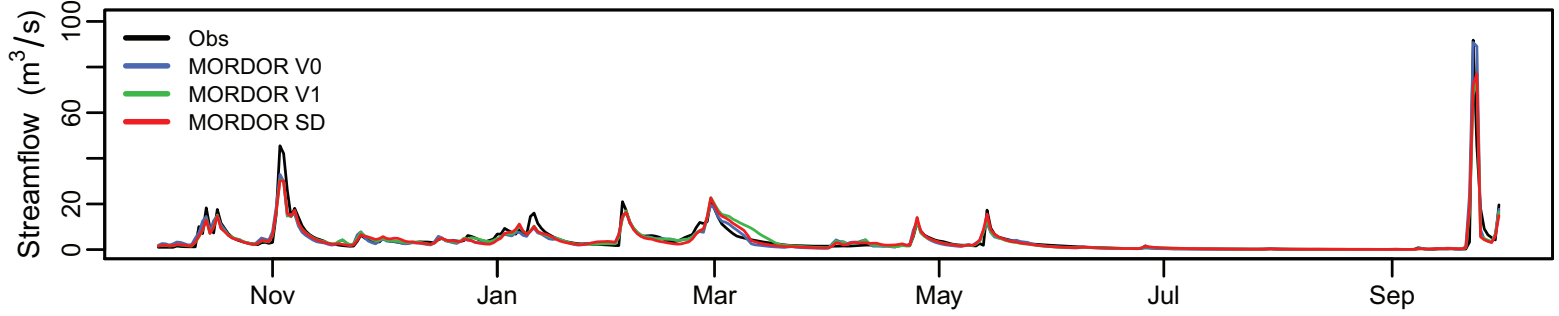

Year 1995

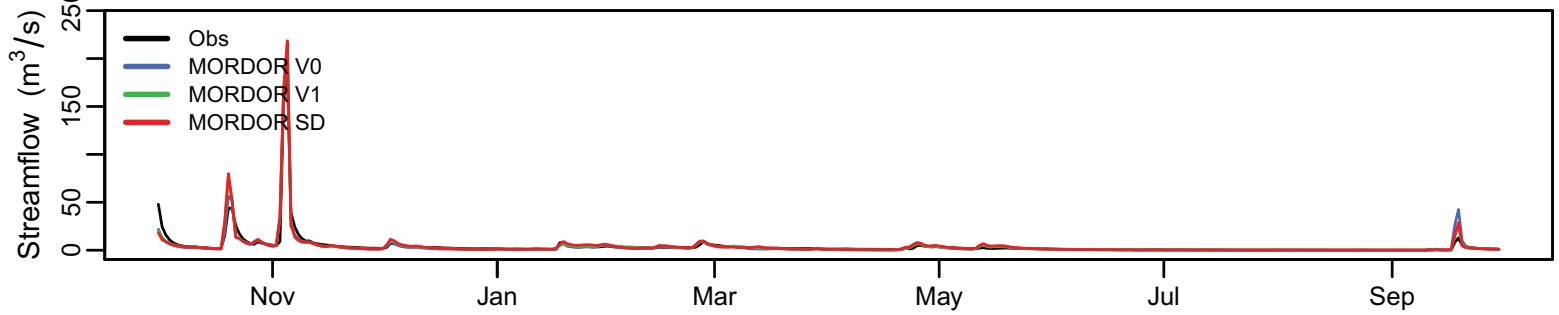

Year 1996

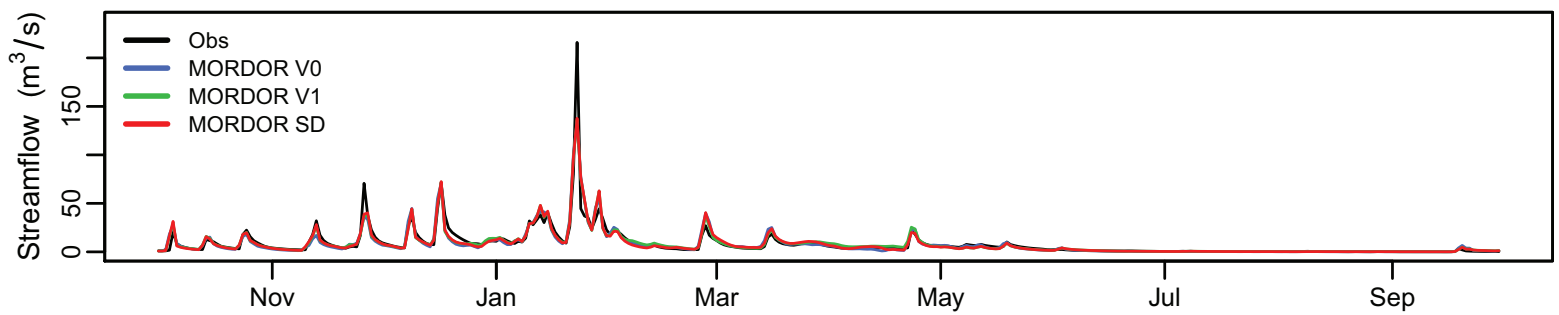

Year 1997

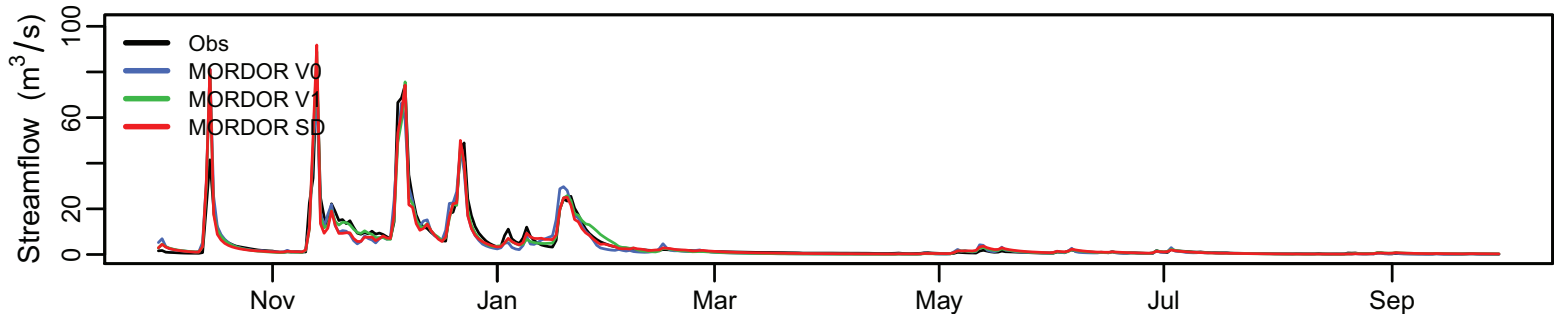

# Tarnon@Florac

Year 1998

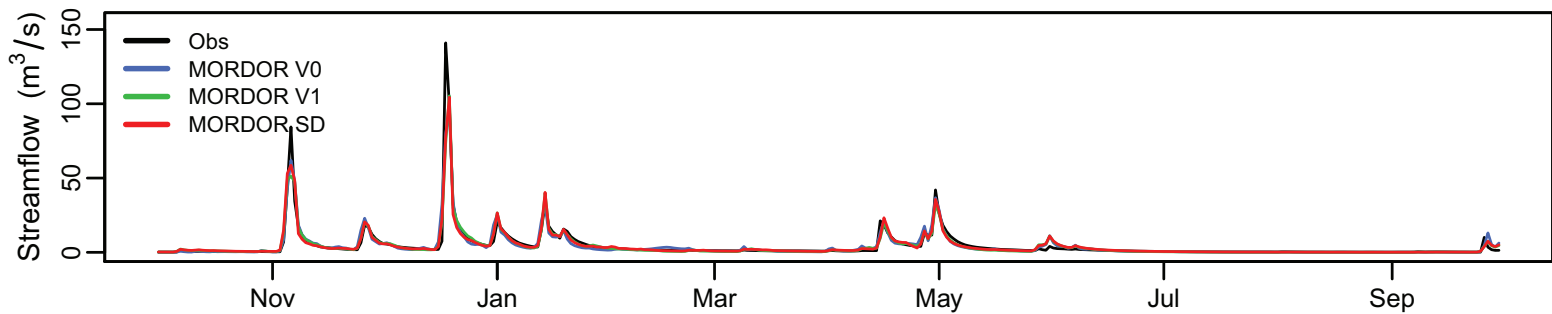

Year 1999

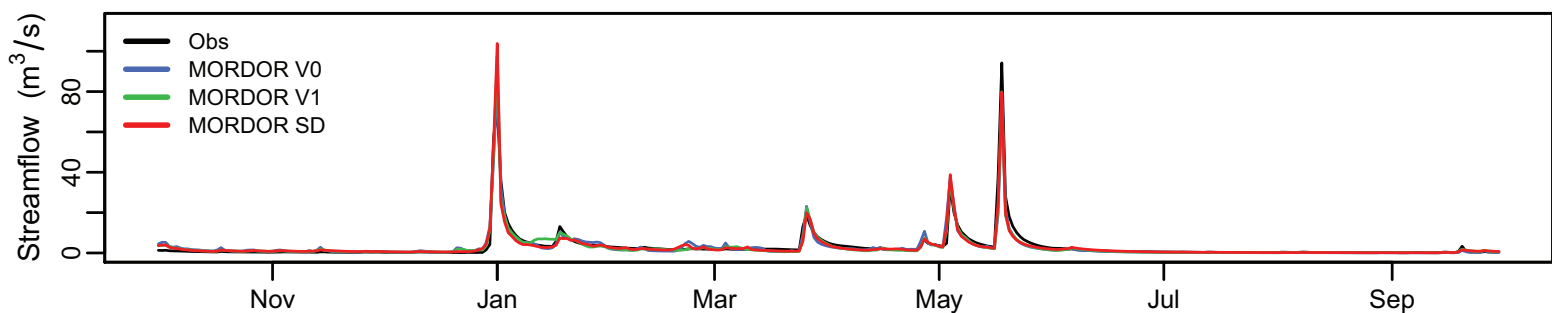

Year 2000

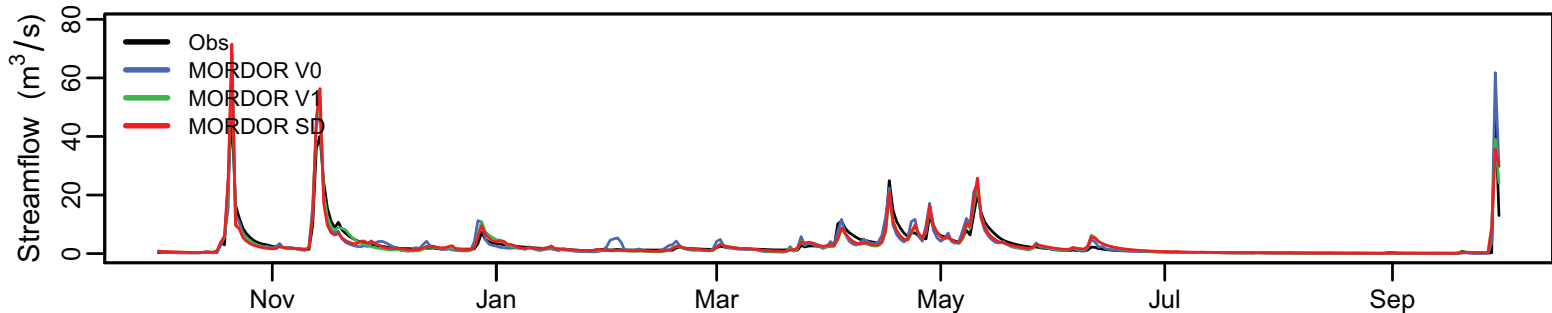

Year 2001

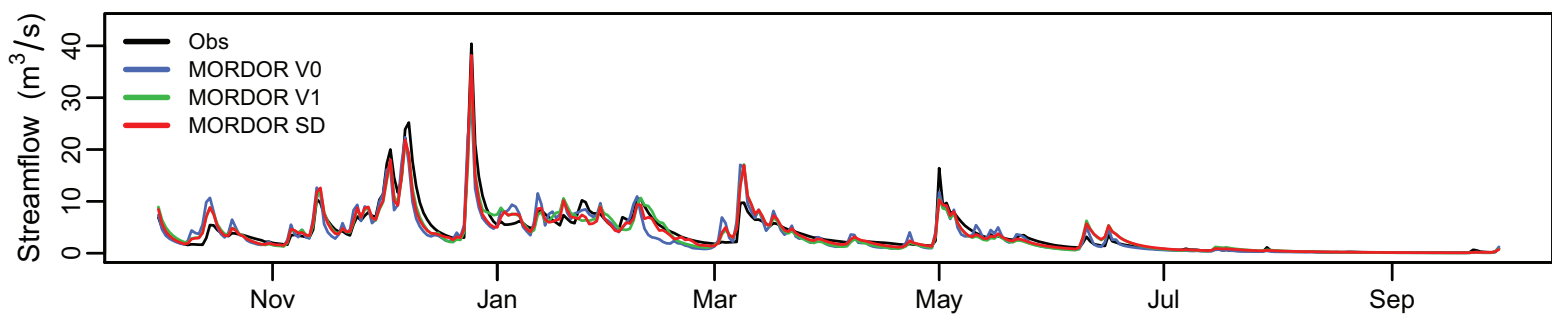

Year 2002

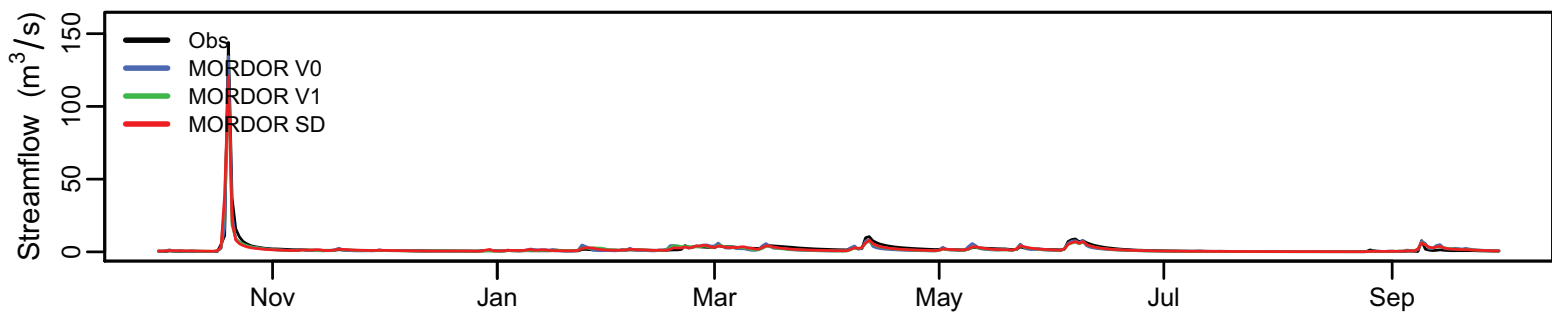

Year 2003

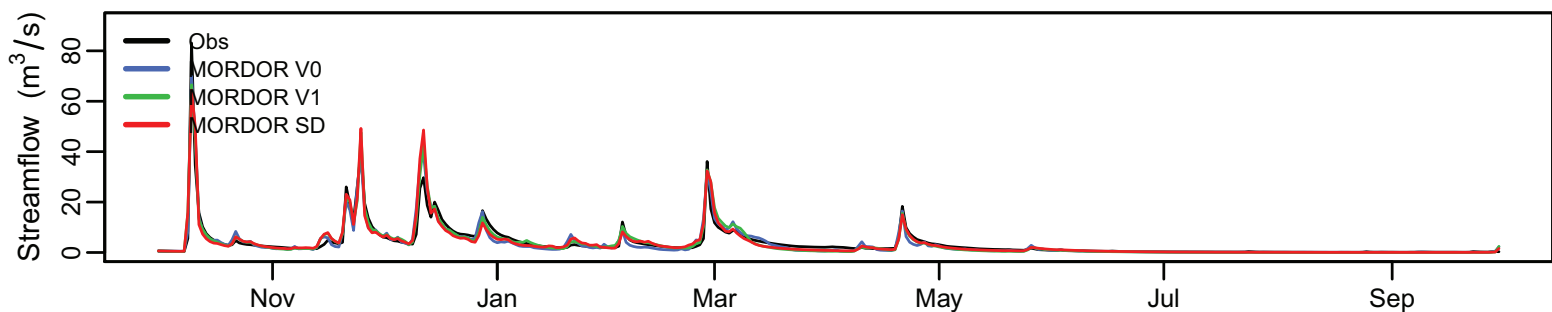

# Tarnon@Florac

Year 2004

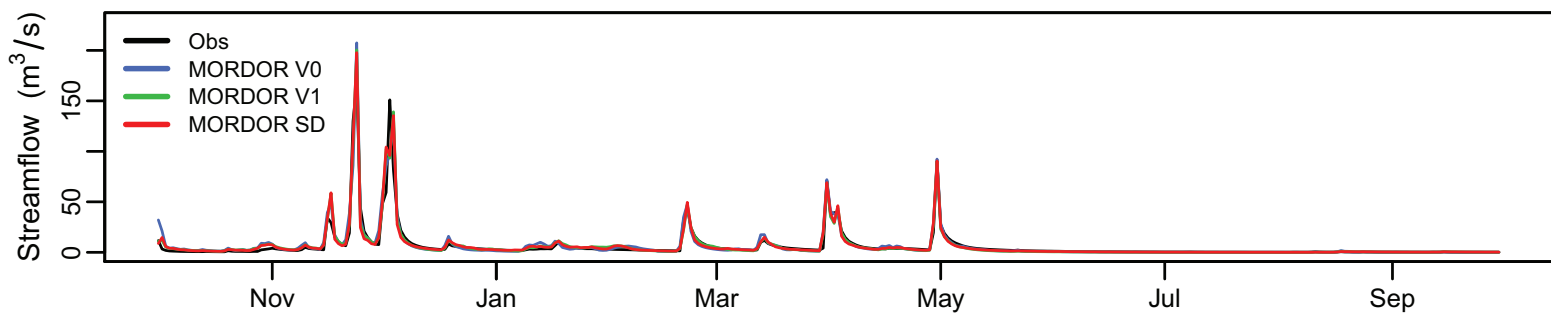

Year 2005

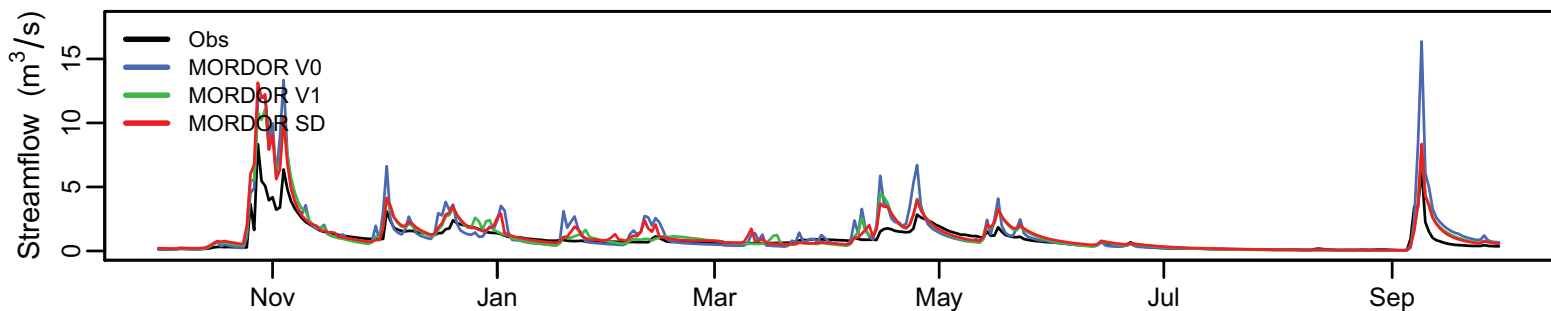

Year 2006

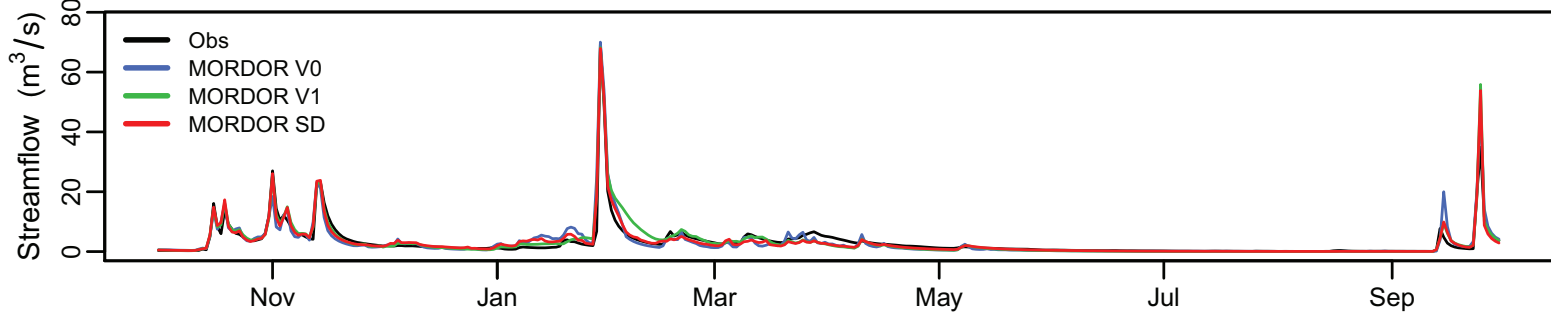

# Taurion@RocheTalamie

Year 1958

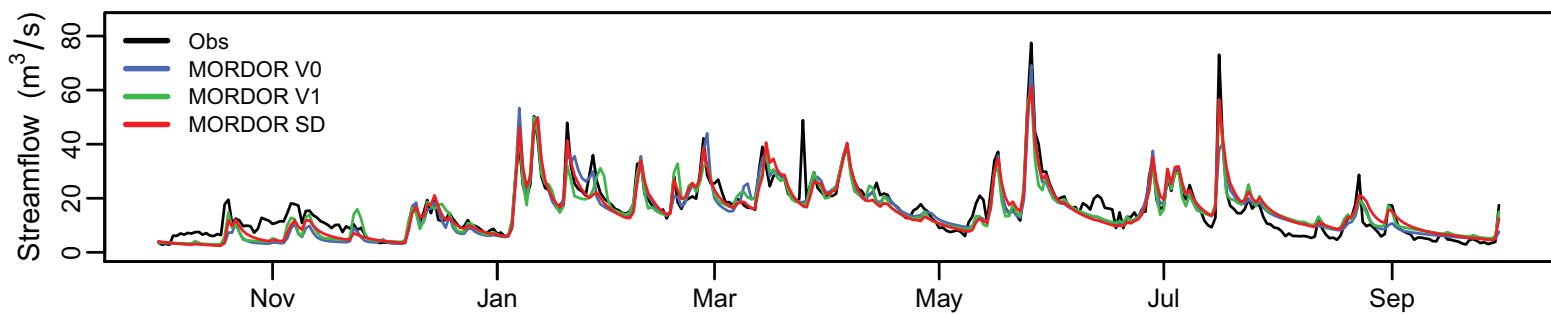

Year 1959

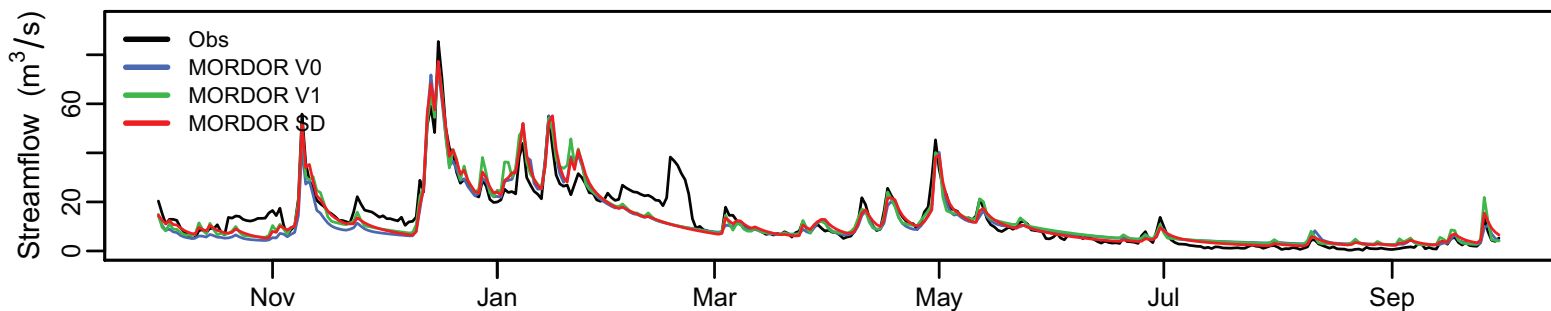

Year 1960

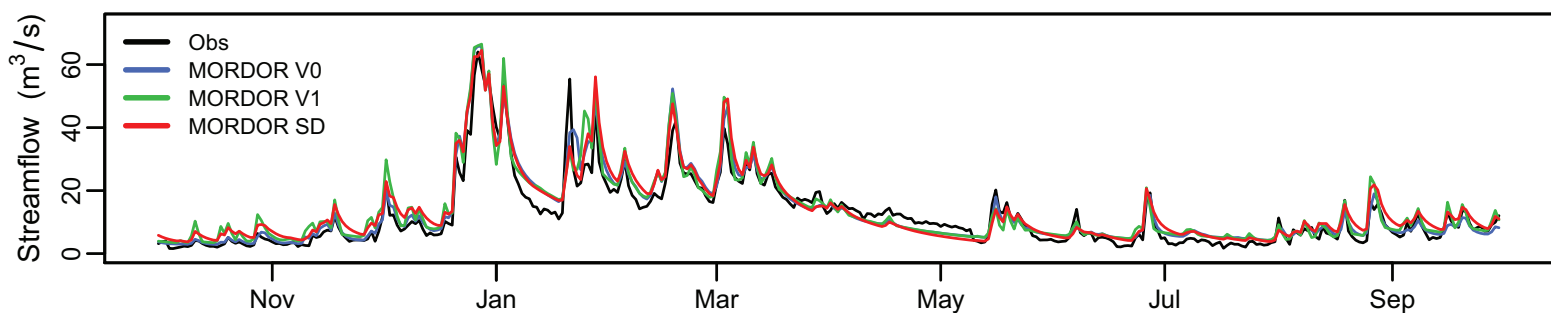

Year 1961

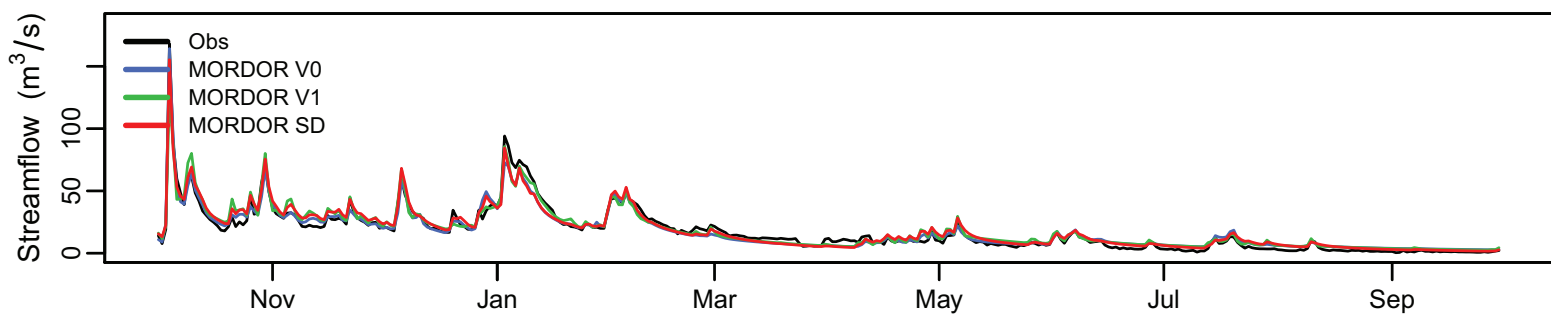

Year 1962

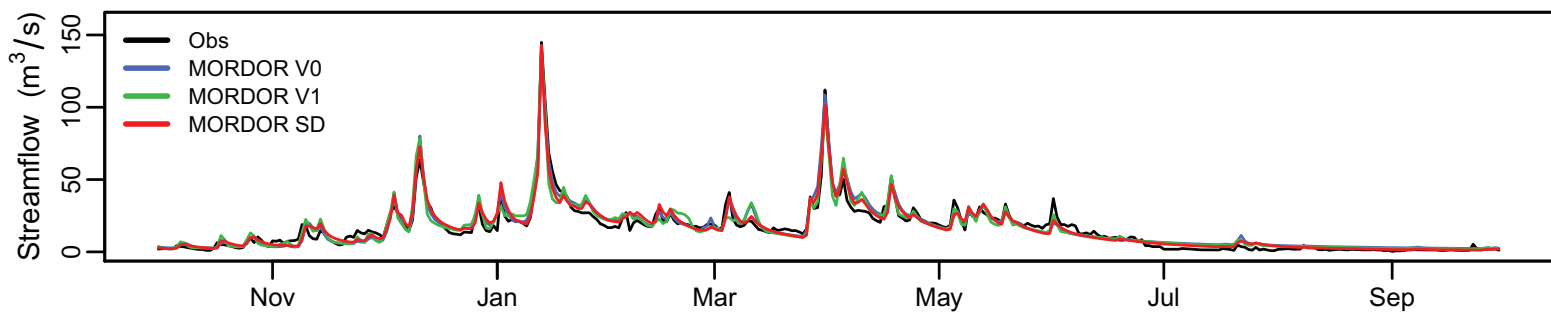

Year 1963

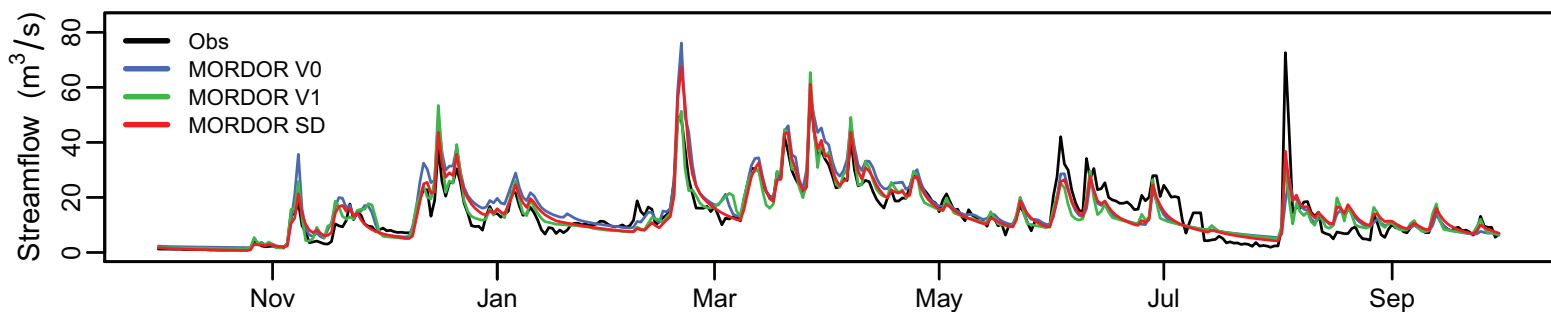

# Taurion@RocheTalamie

Year 1964

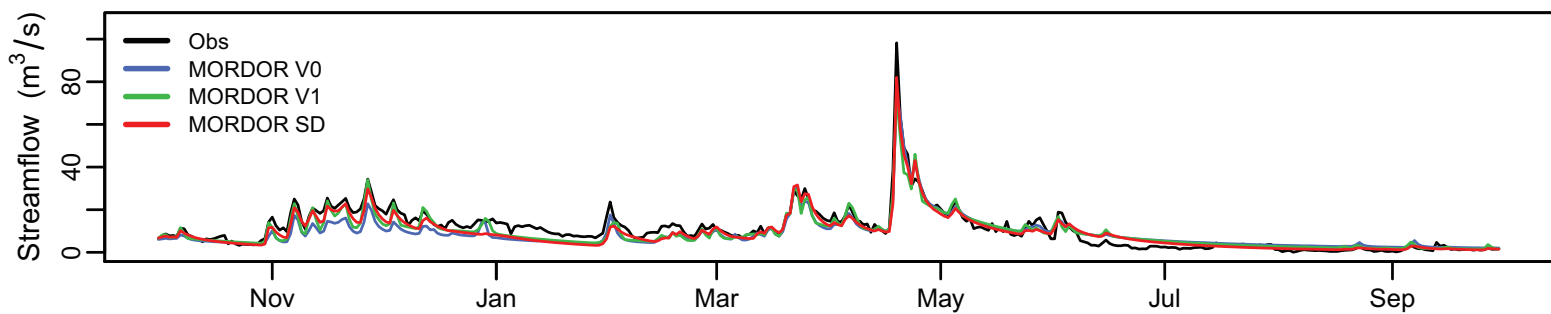

Year 1965

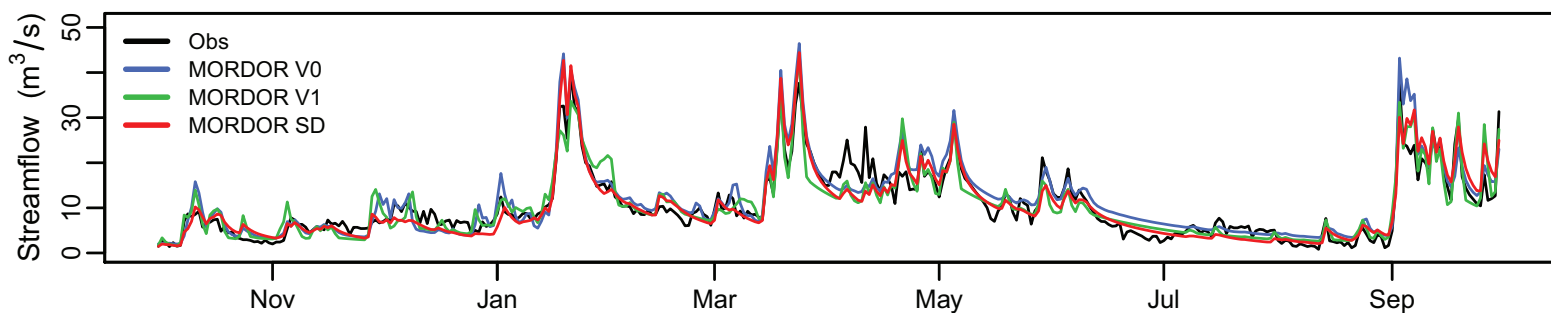

Year 1966

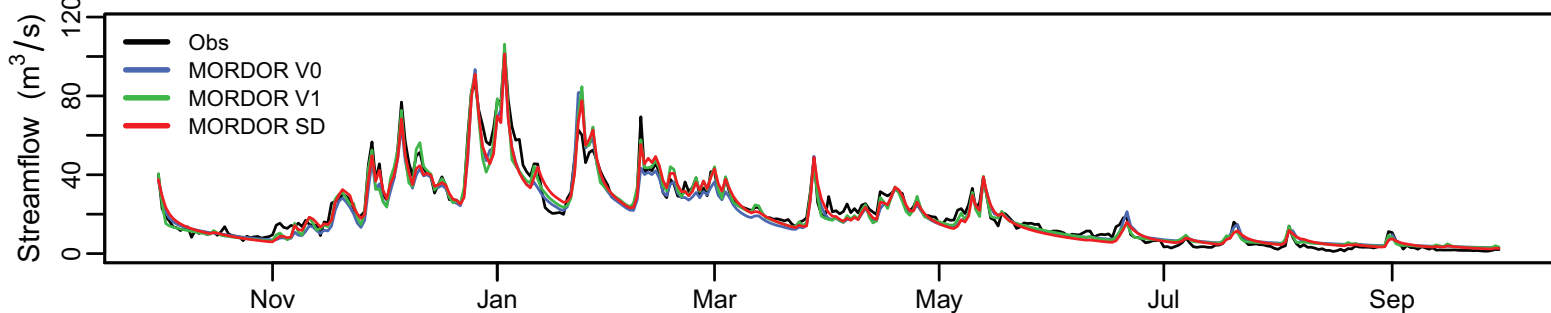

Year 1967

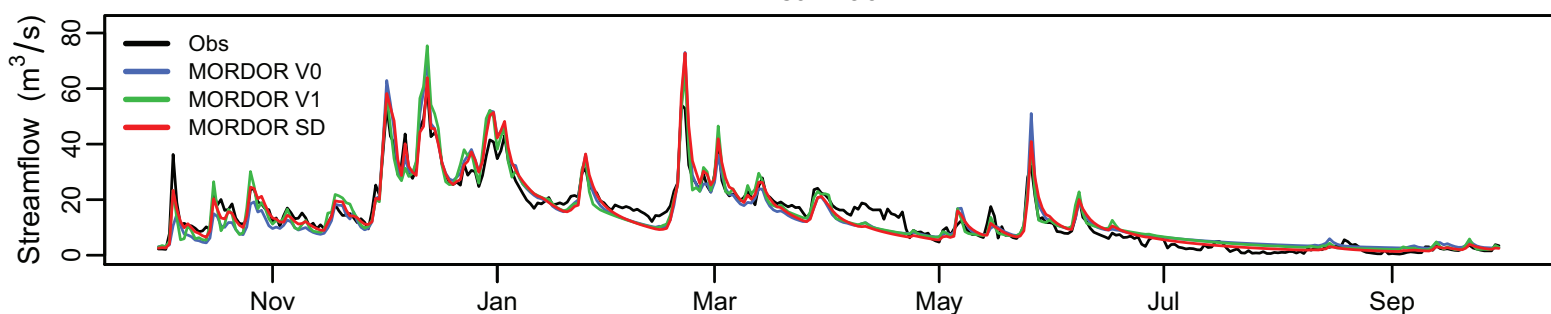

Year 1968

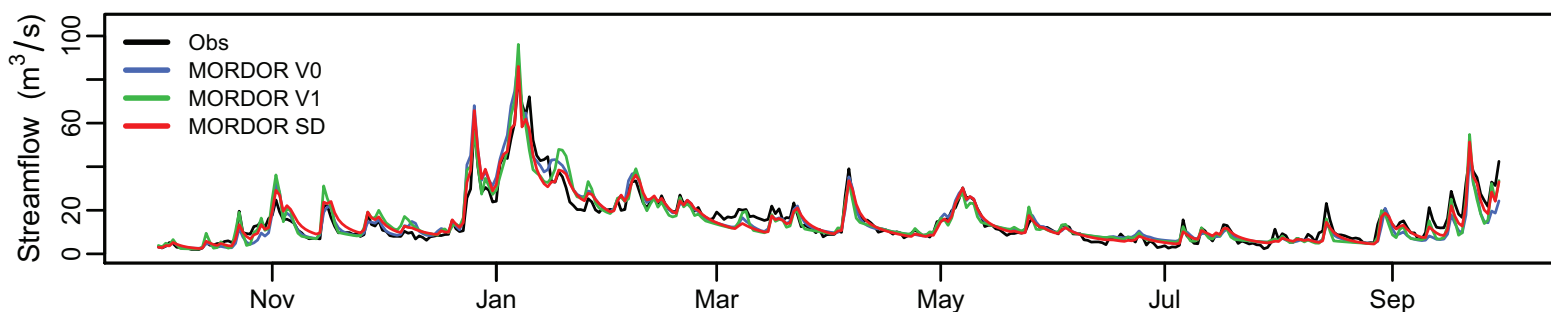

Year 1969

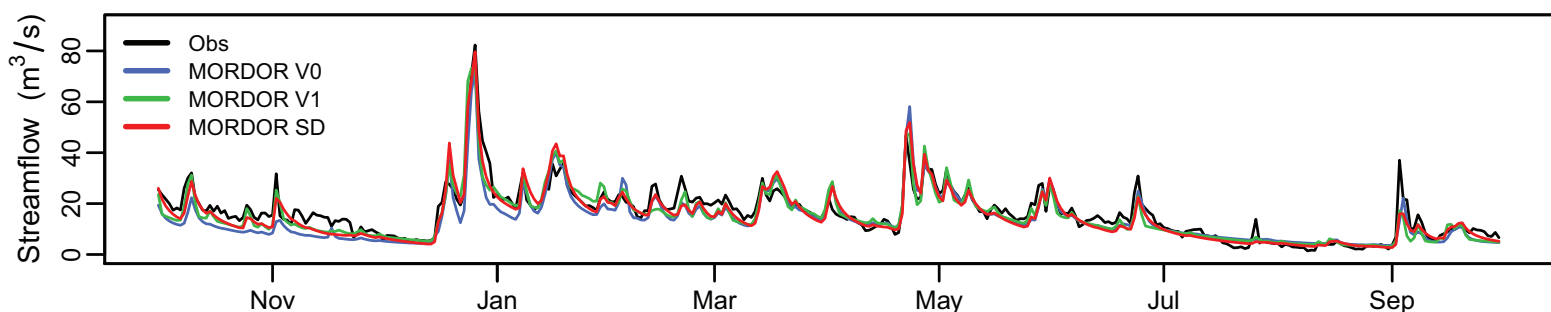

# Taurion@RocheTalamie

Year 1970

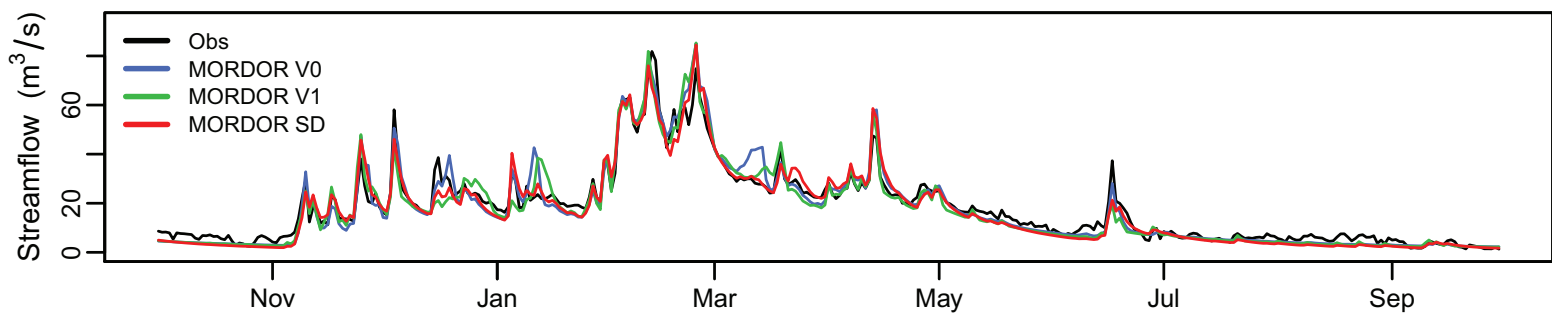

Year 1971

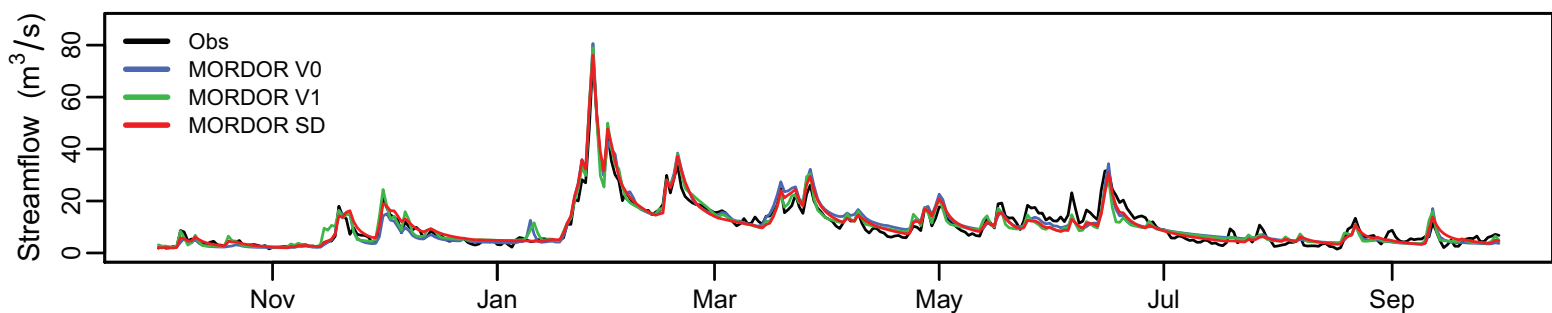

Year 1972

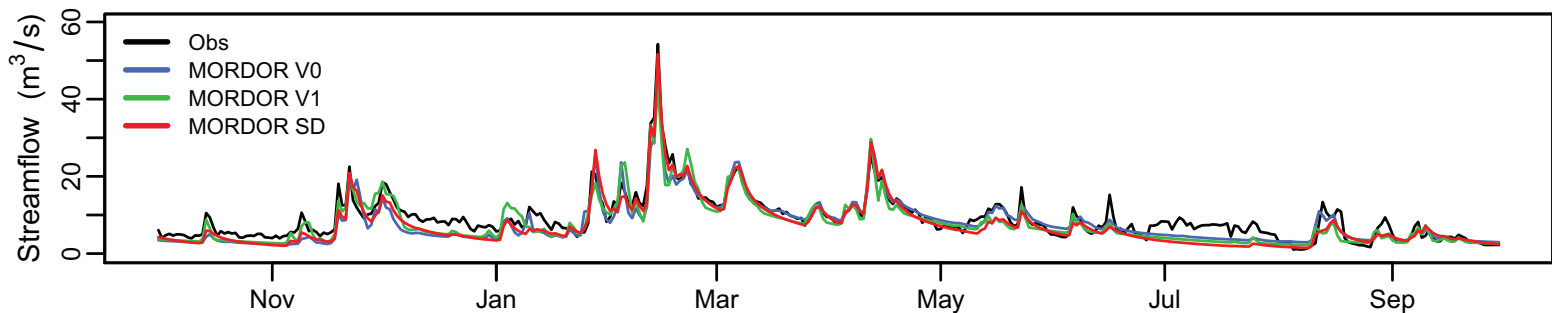

Year 1973

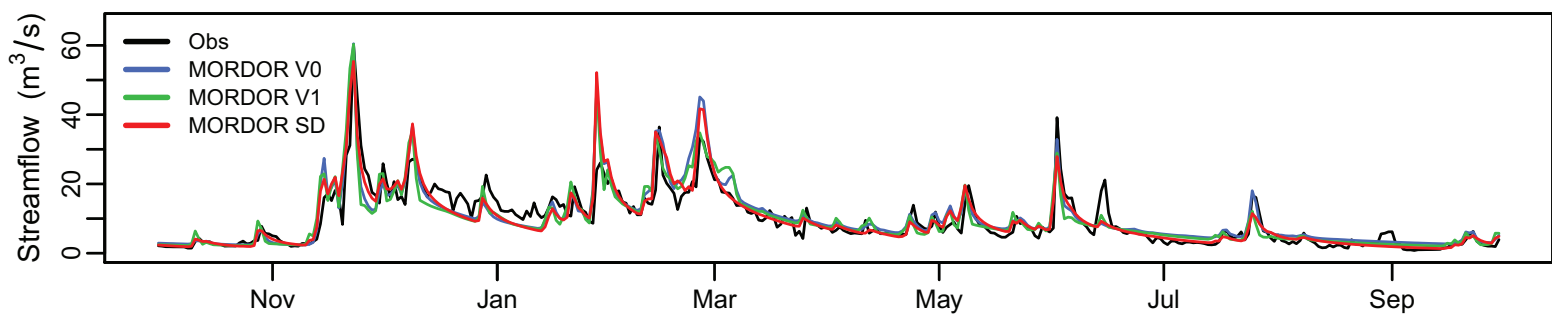

Year 1974

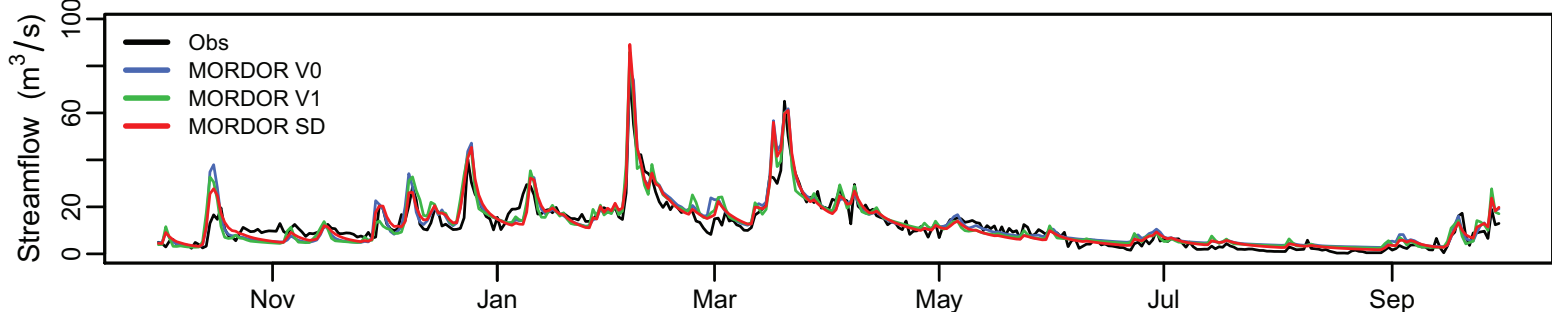

Year 1975

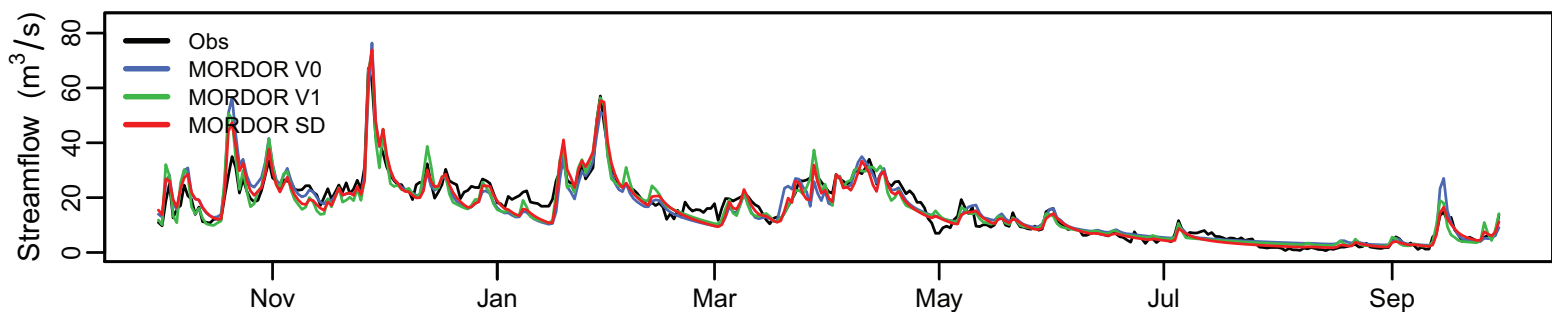

# Taurion@RocheTalamie

Year 1976

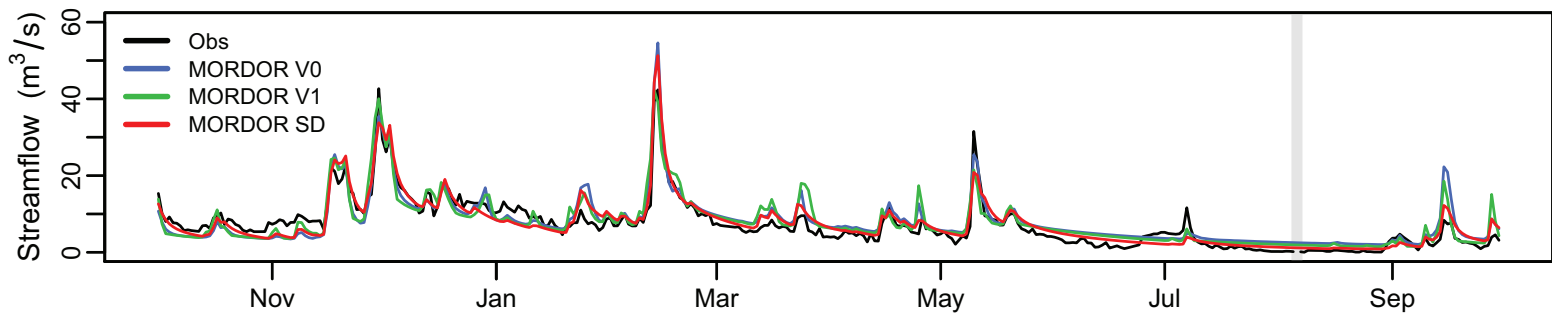

Year 1977

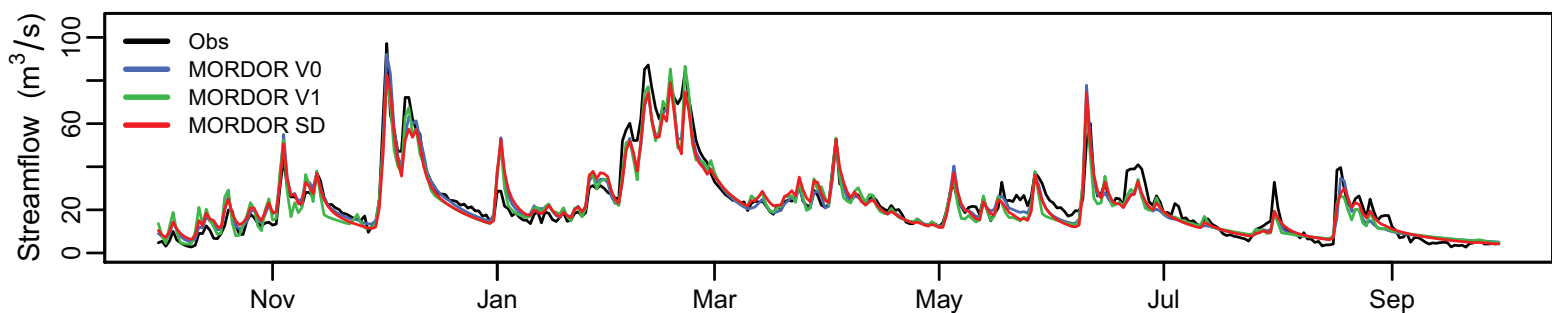

Year 1978

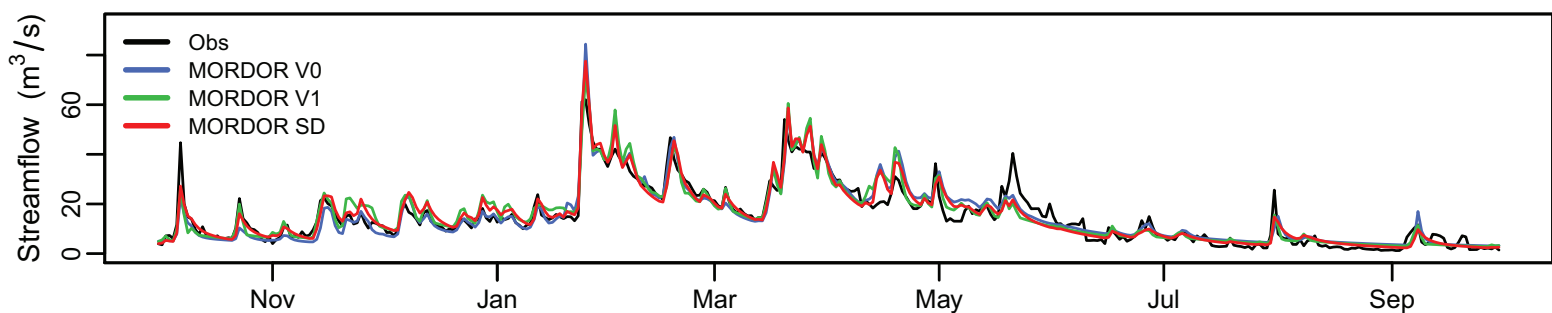

Year 1979

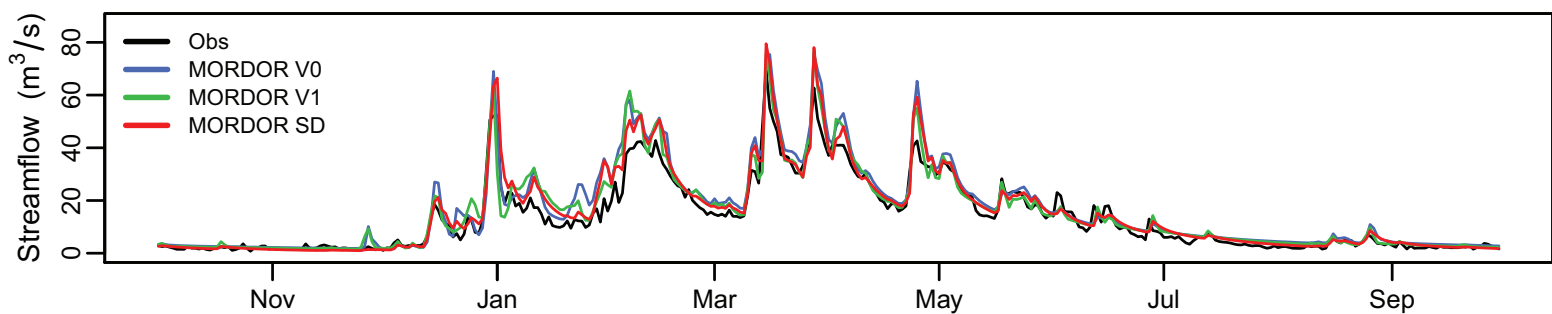

Year 1980

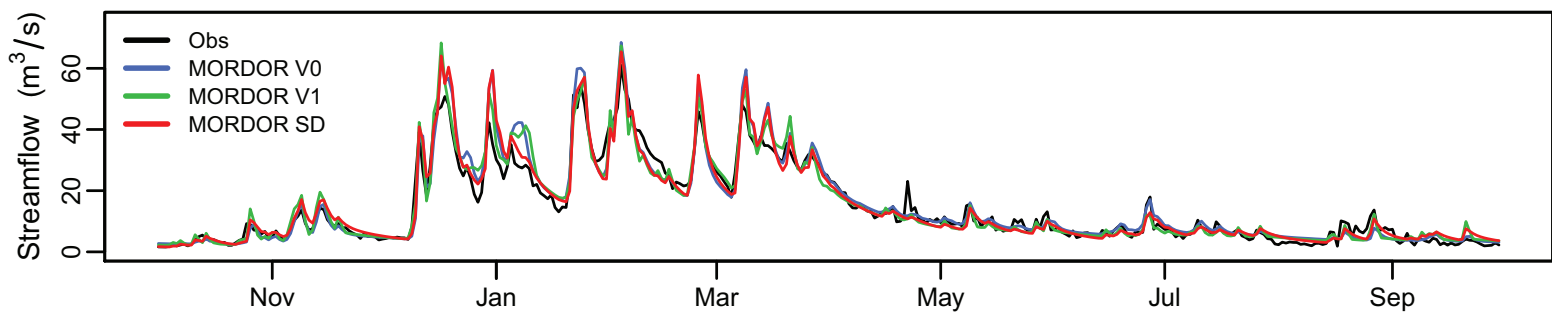

Year 1981

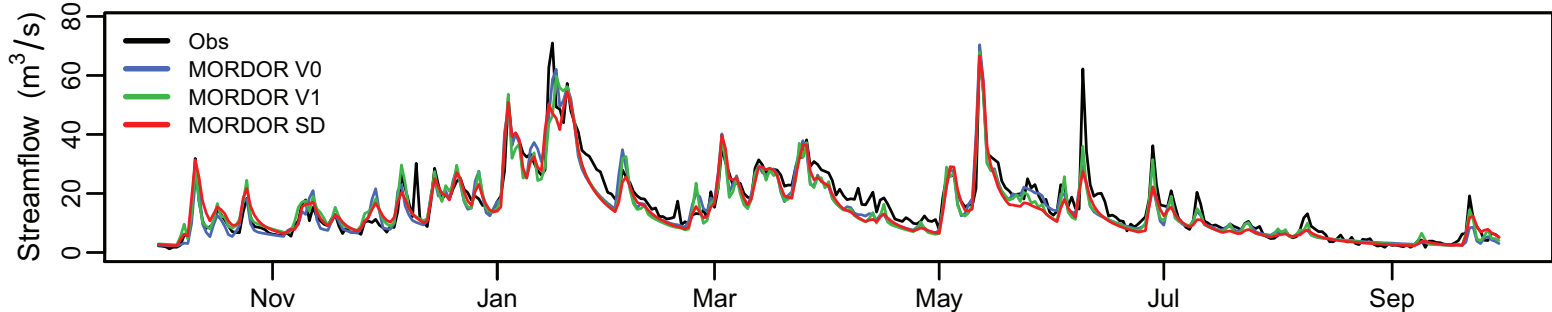



# Taurion@RocheTalamie

Year 1982

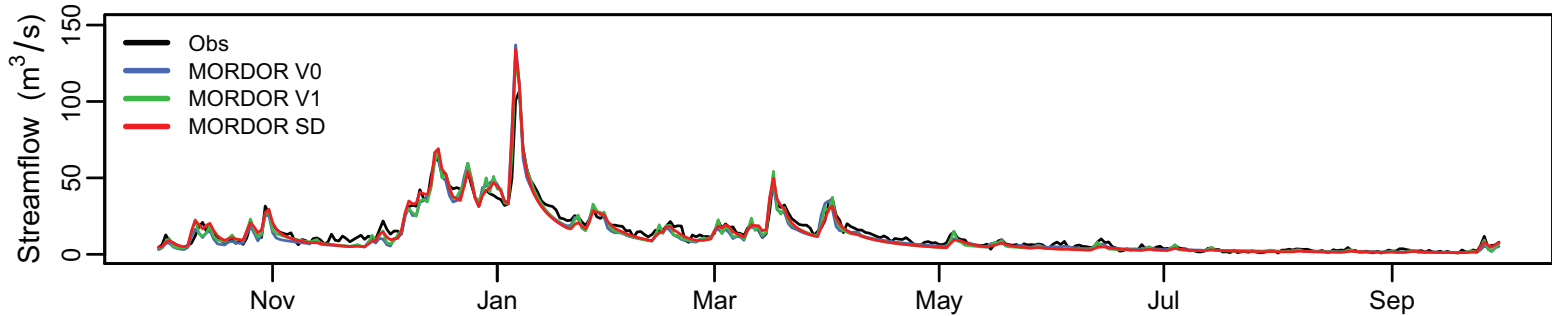

Year 1983

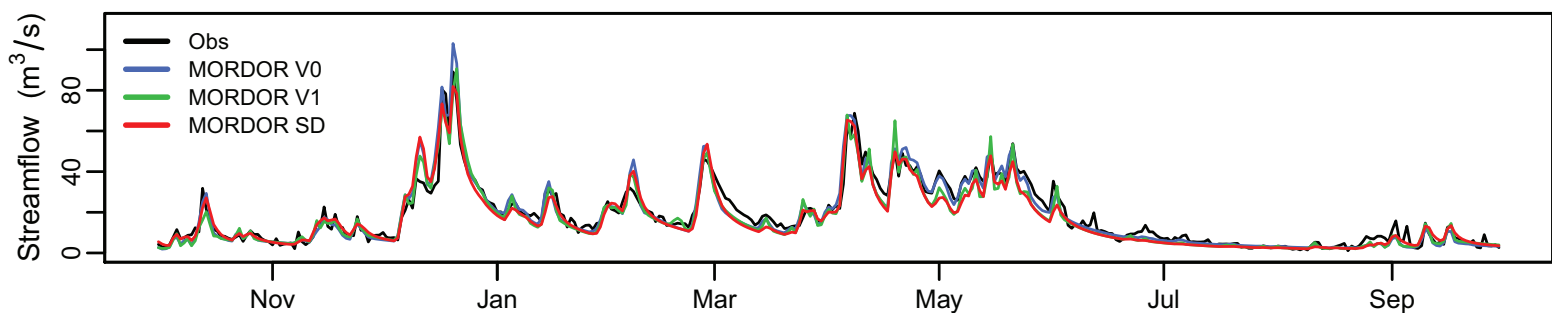

Year 1984

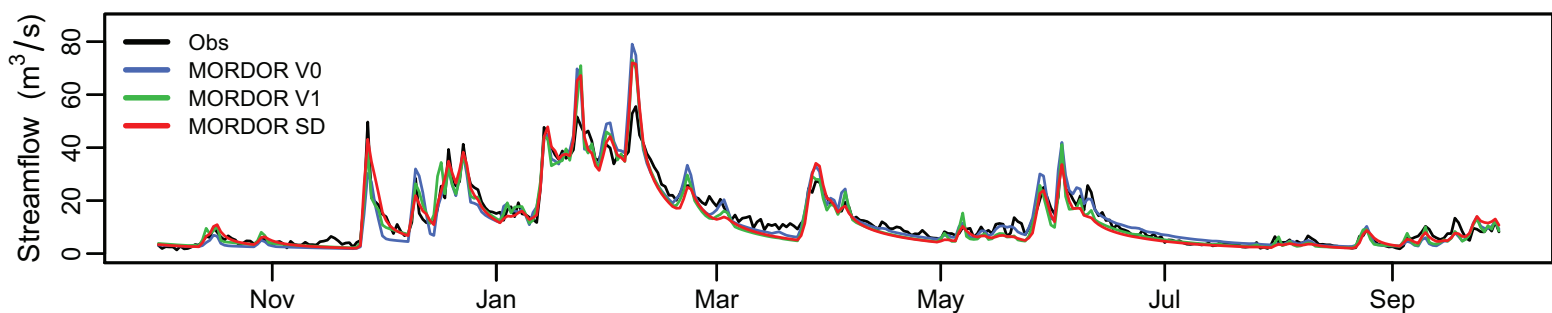

Year 1985

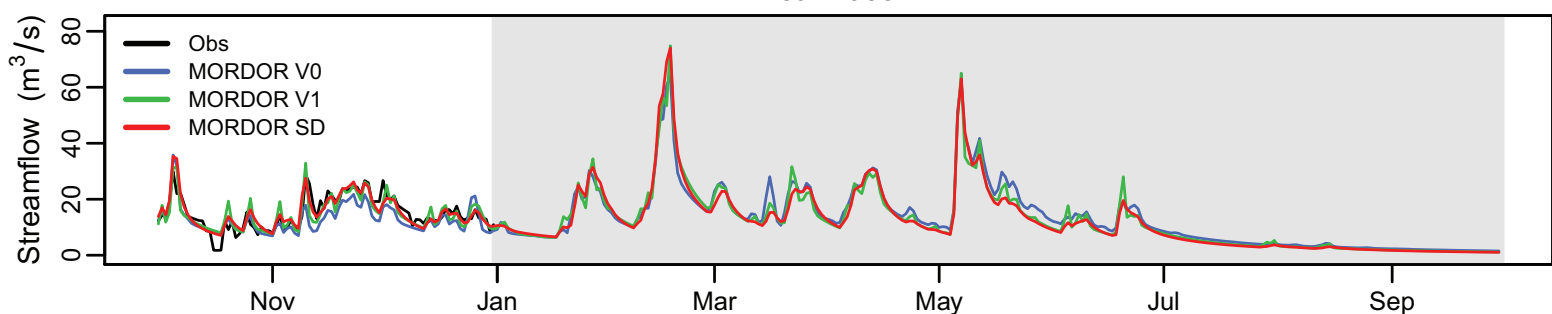

Year 1986

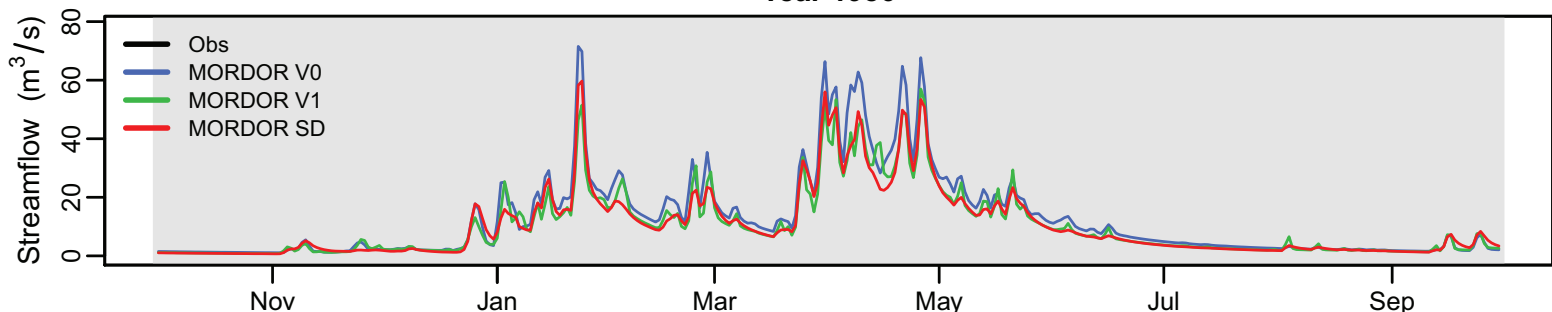

Year 1987

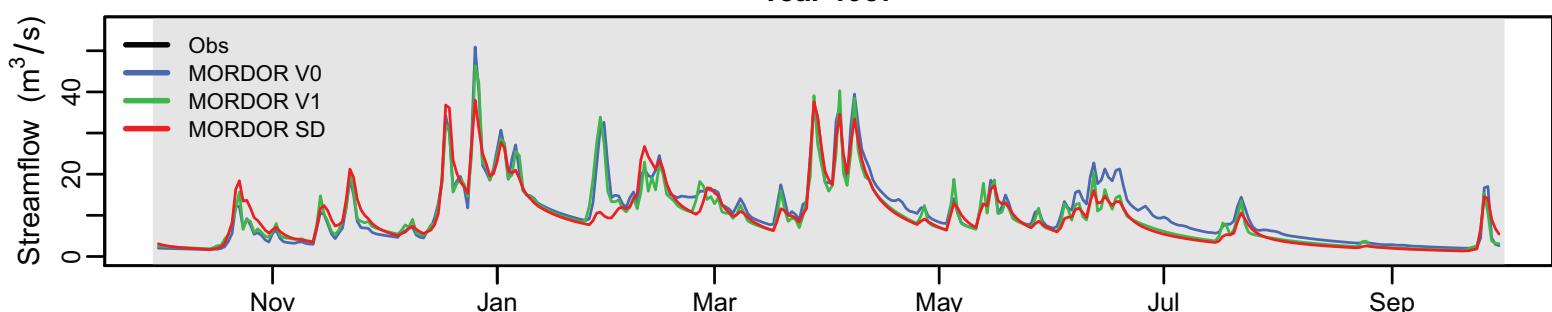

# Taurion@RocheTalamie

Year 1988

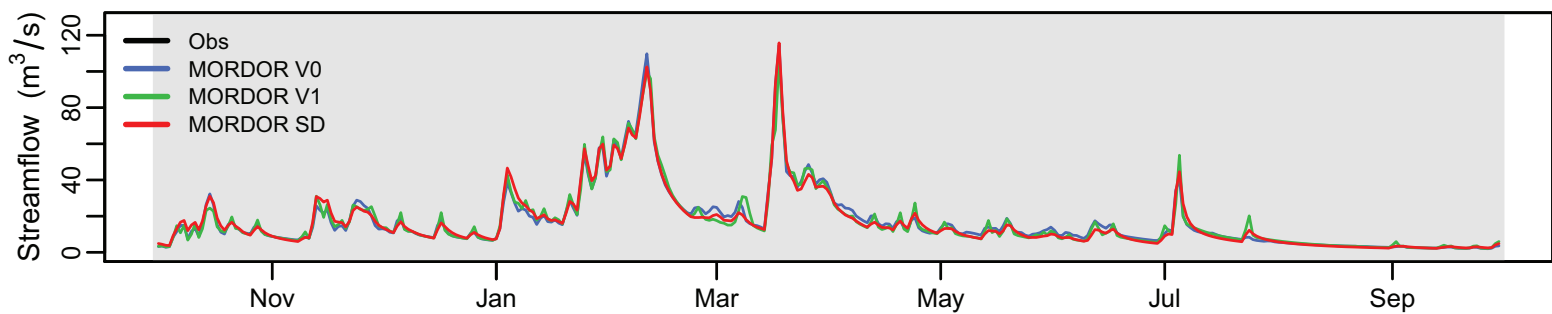

Year 1989

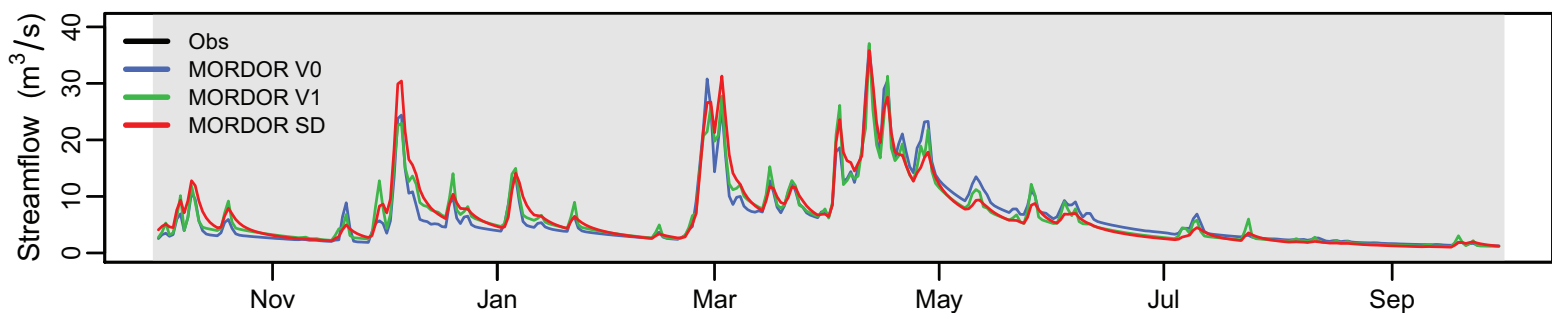

Year 1990

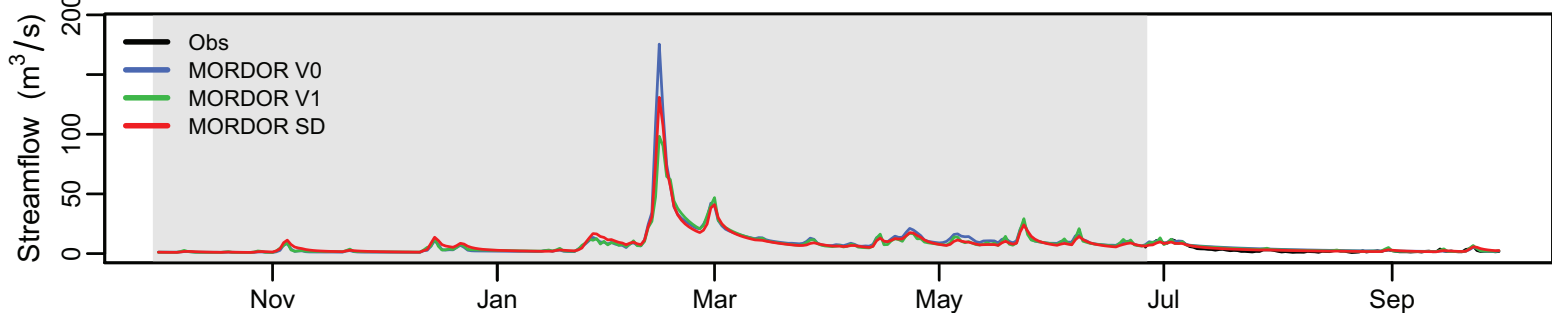

Year 1991

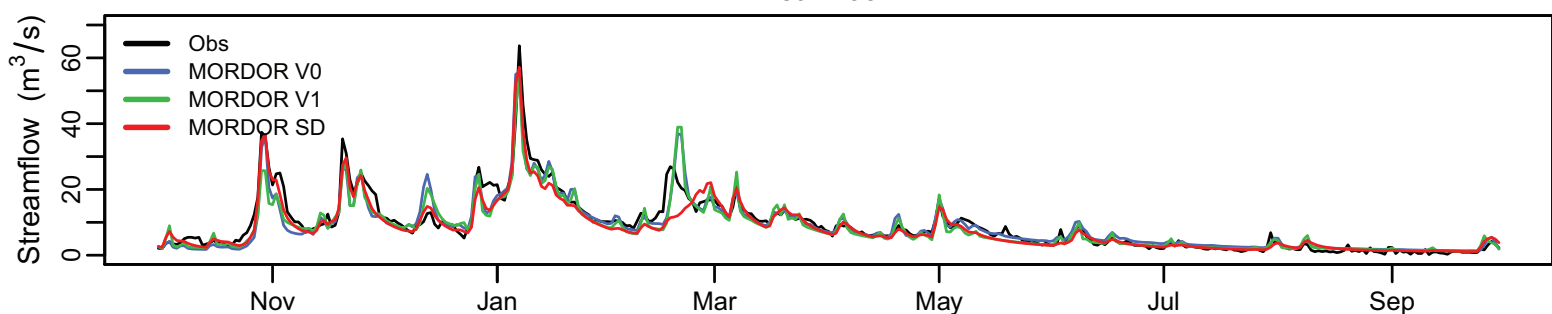

Year 1992

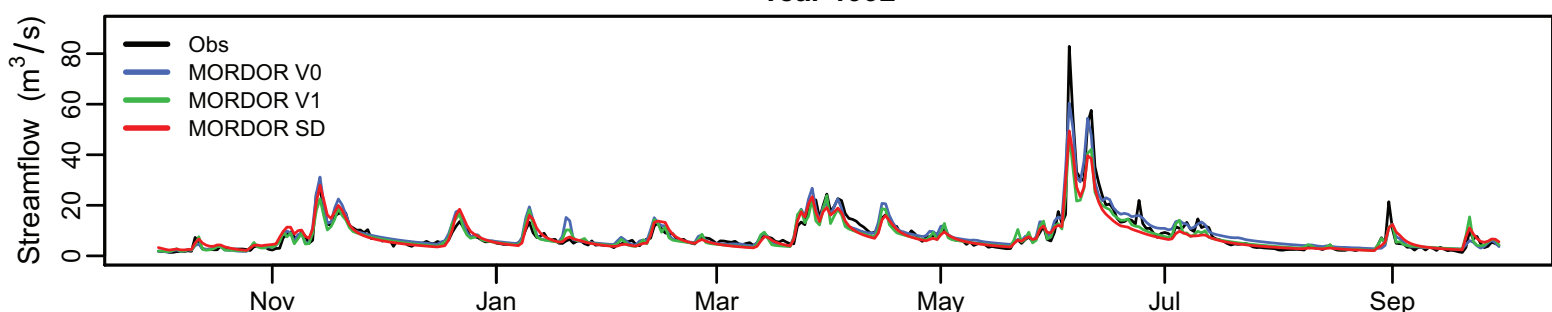

Year 1993

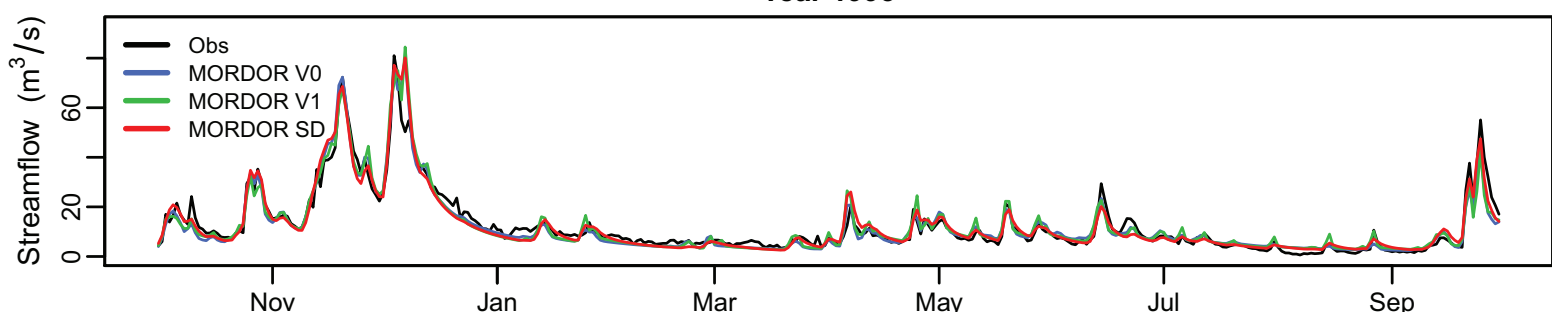

# Taurion@RocheTalamie

Year 1994

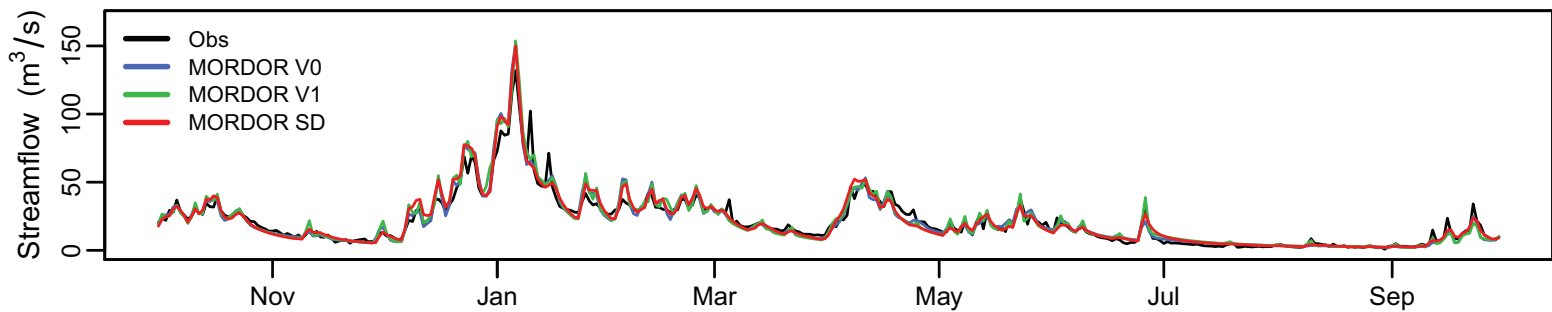

Year 1995

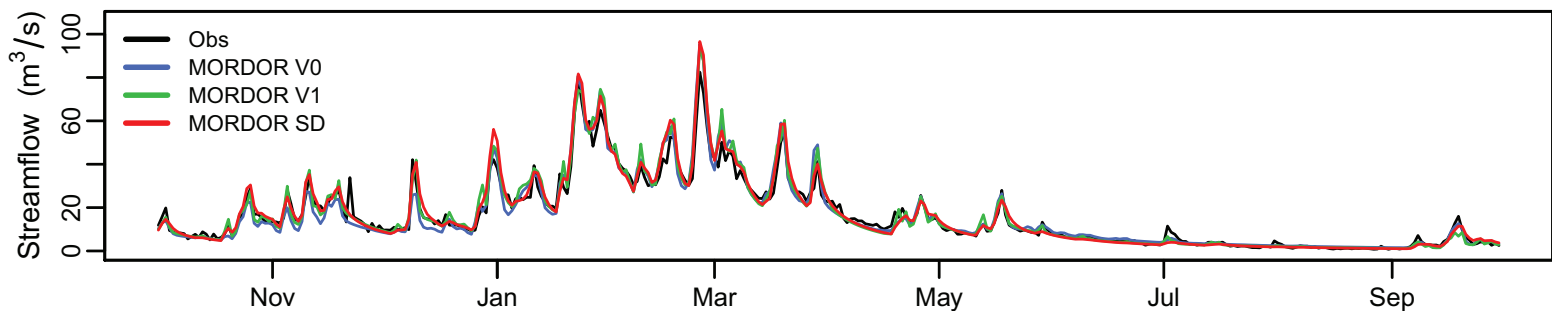

Year 1996

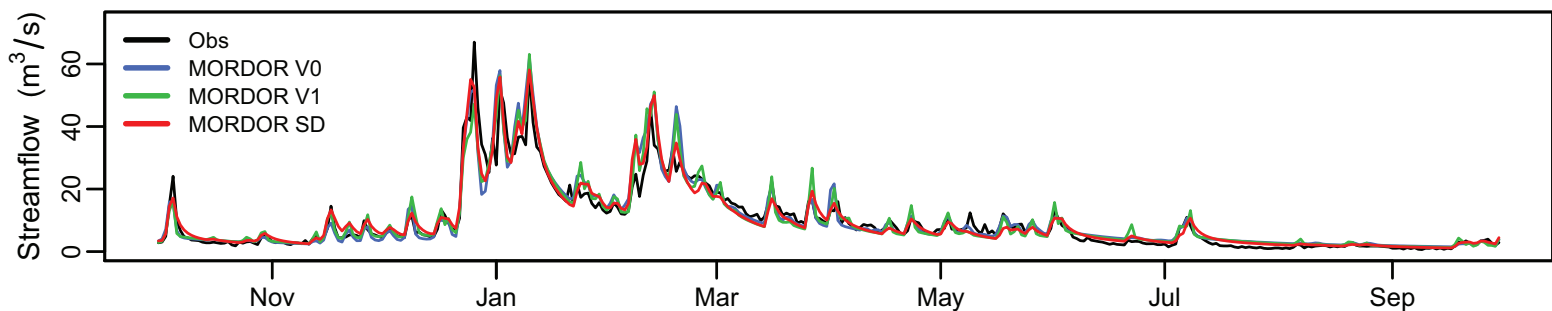

Year 1997

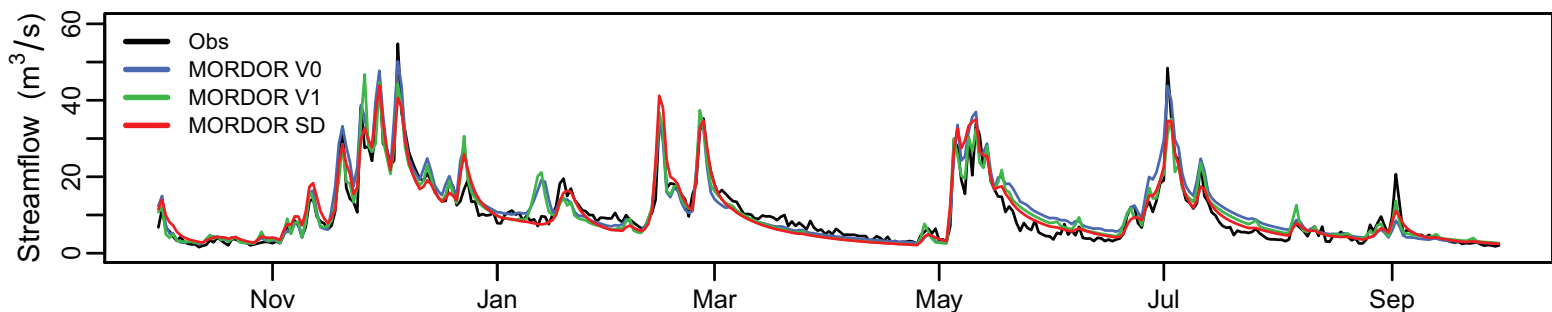

Year 1998

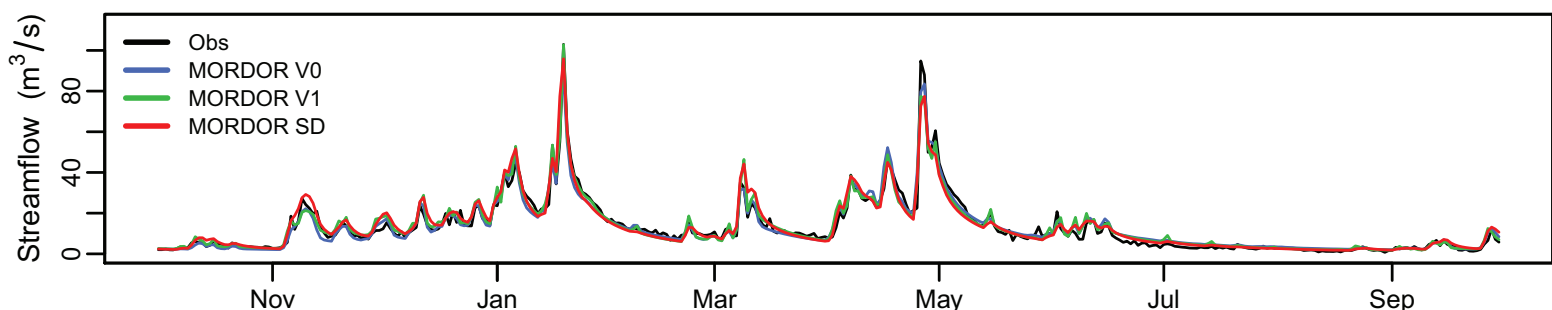

Year 1999

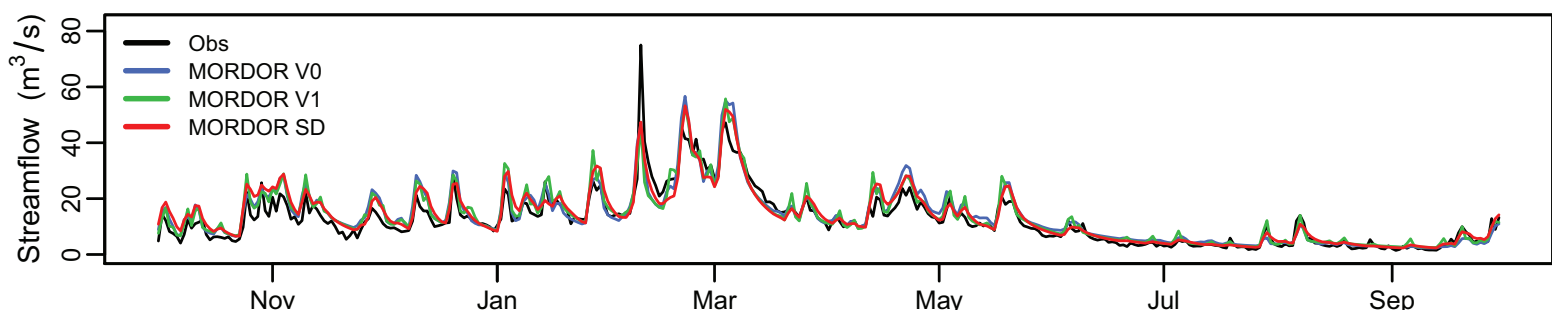

# Taurion@RocheTalamie

Year 2000

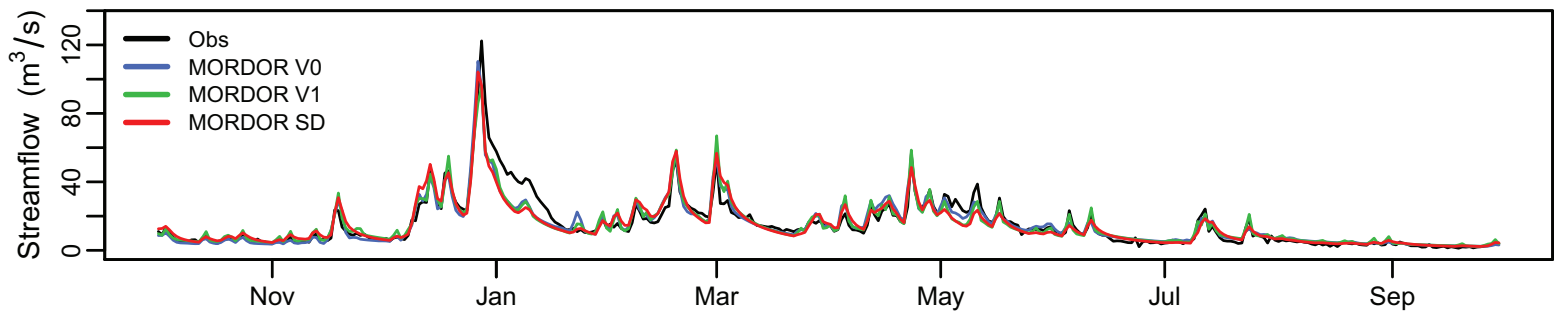

Year 2001

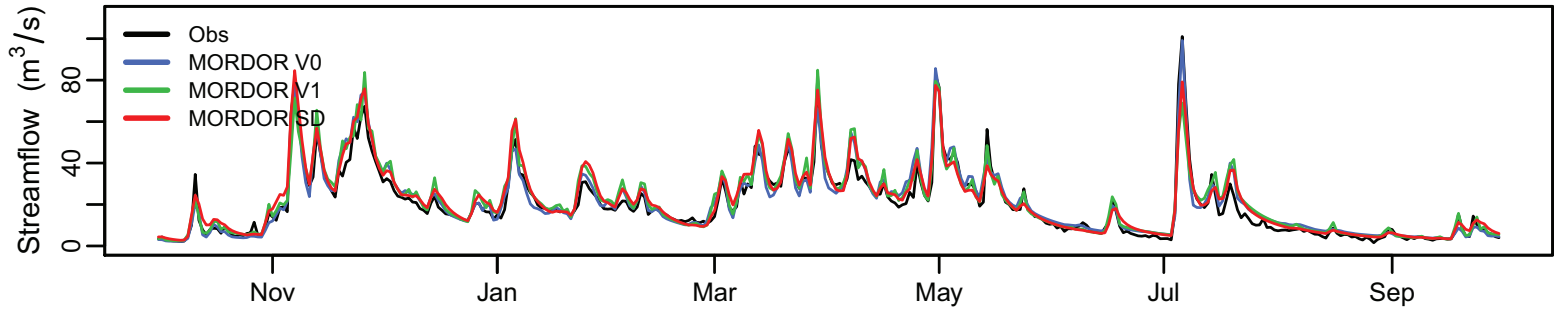

Year 2002

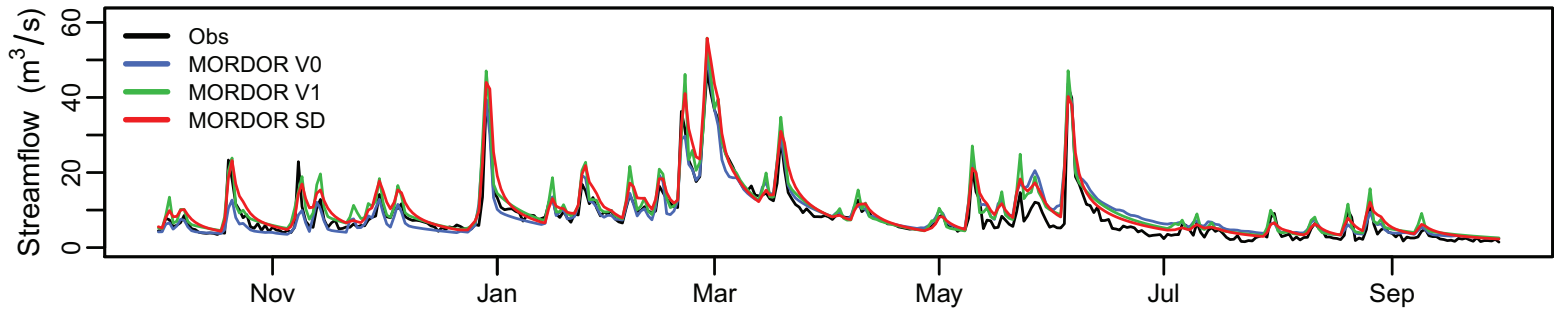

# Tech@Reynes

Year 1972

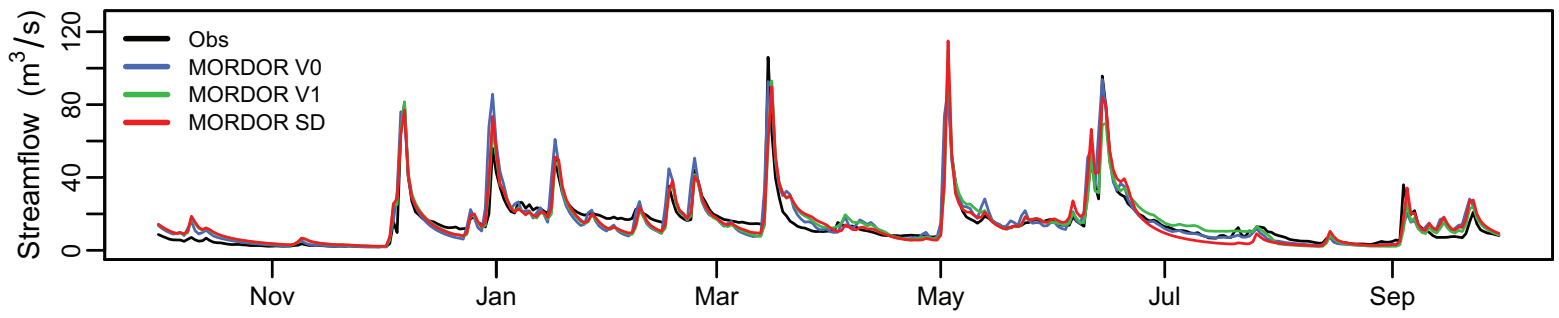

Year 1973

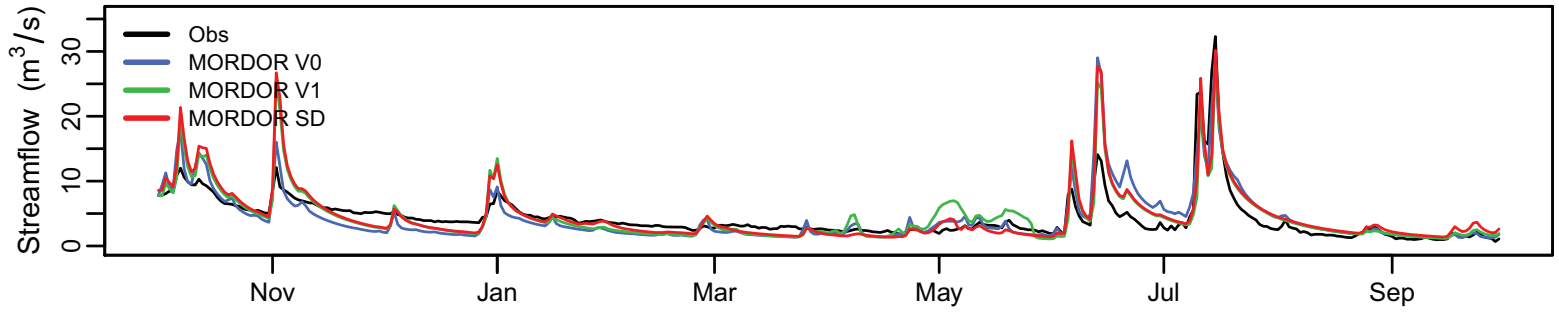

Year 1974

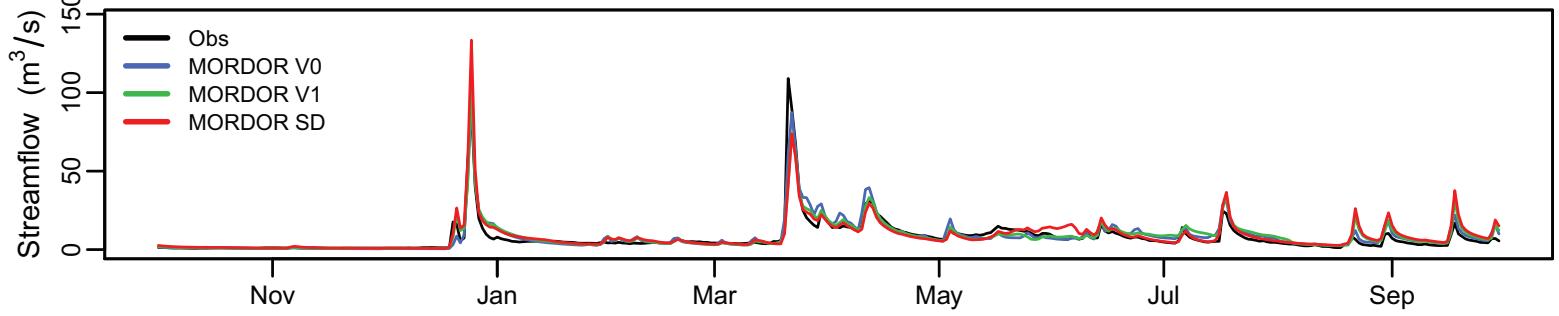

Year 1975

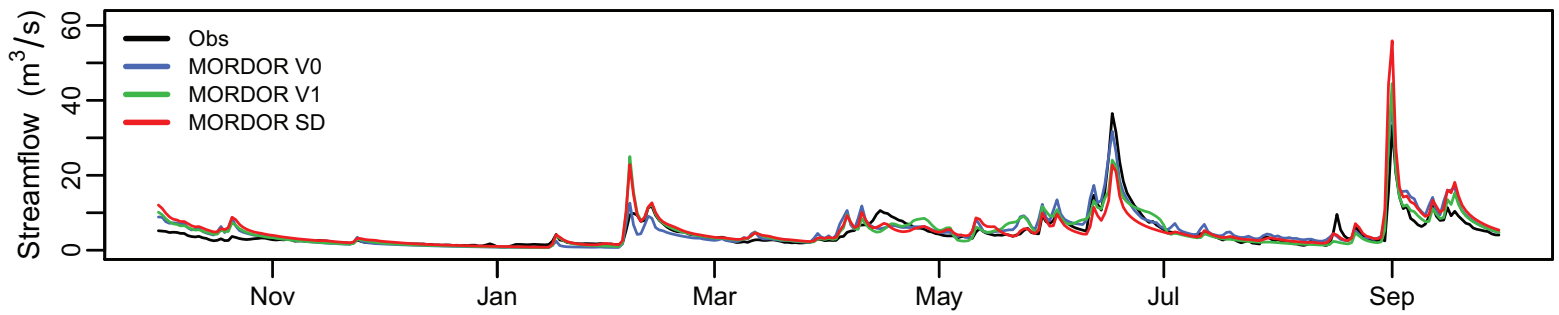

Year 1976

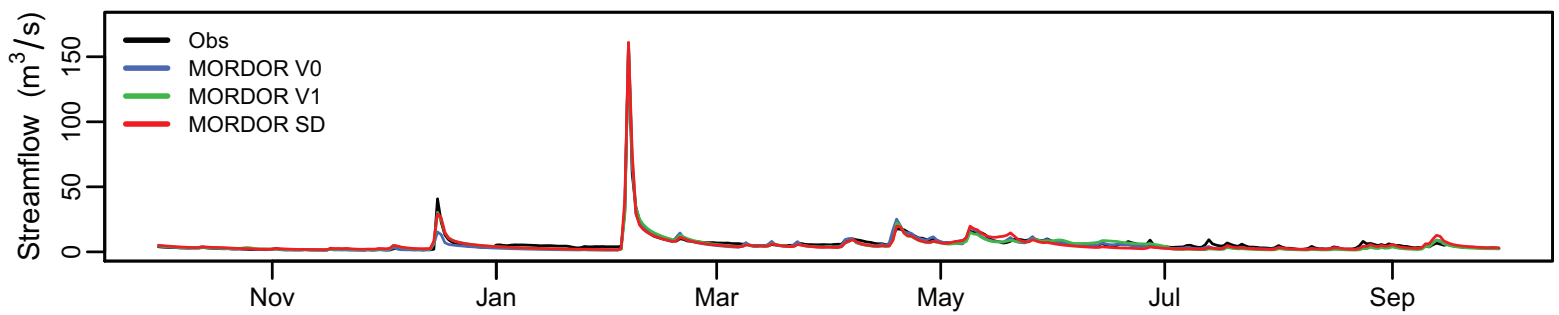

Year 1977

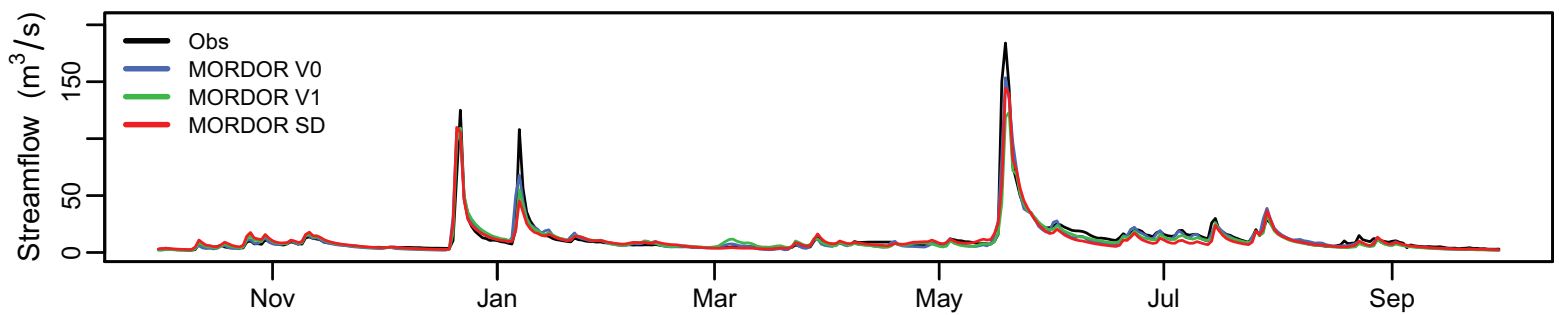

# Tech@Reynes

Year 1978

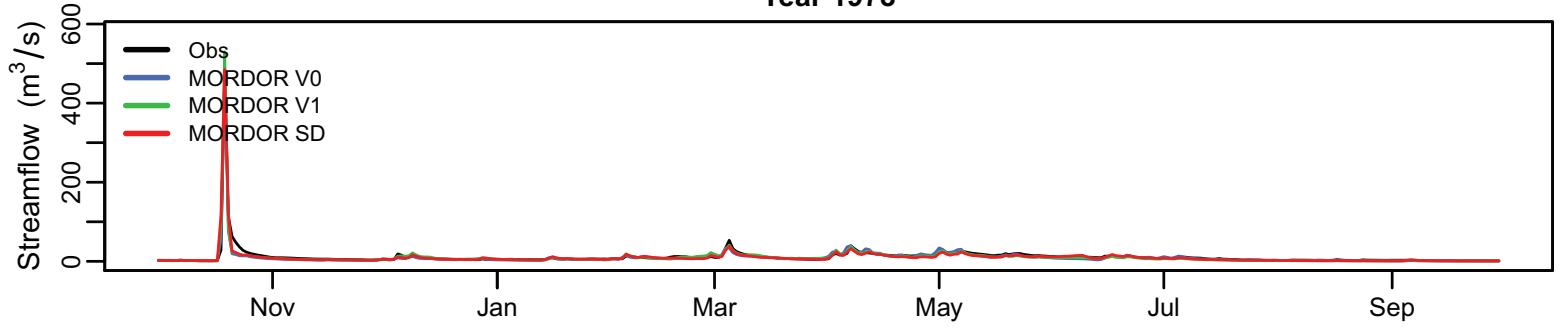

Year 1979

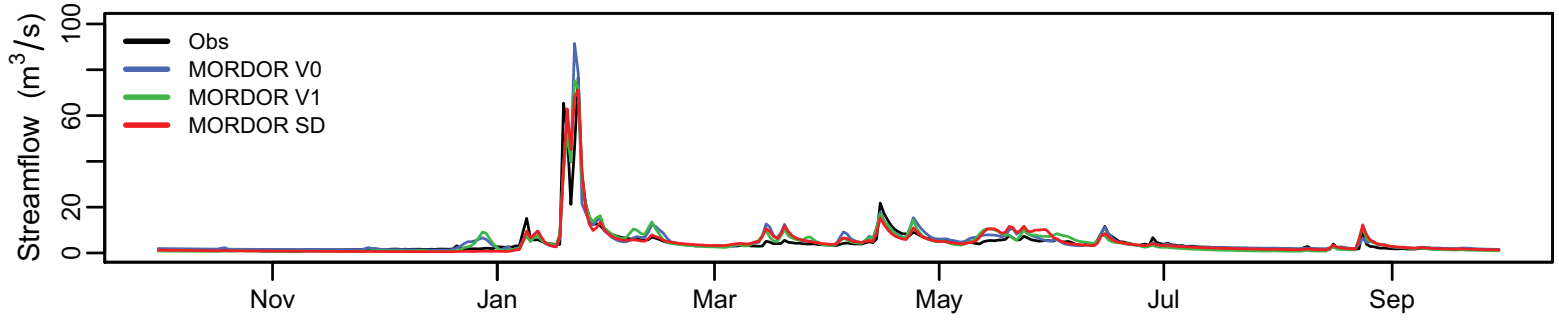

Year 1980

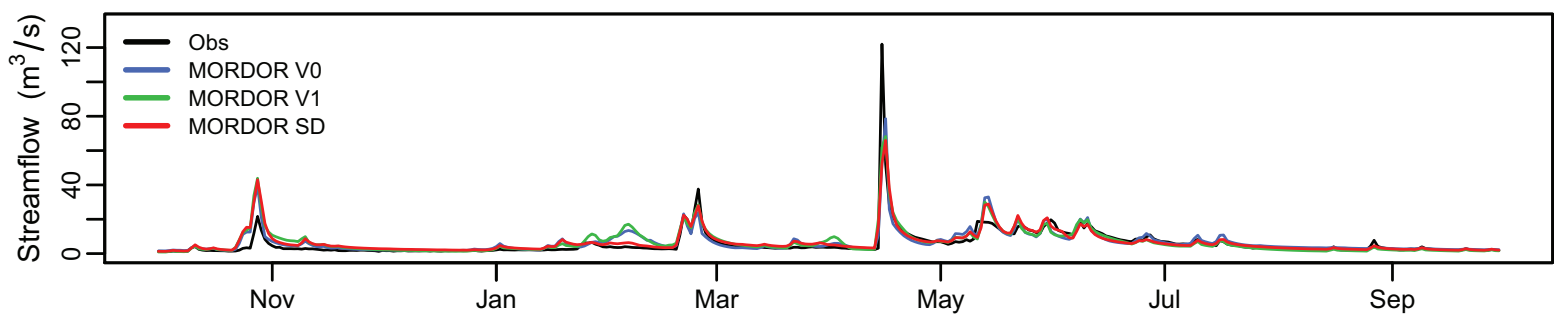

Year 1981

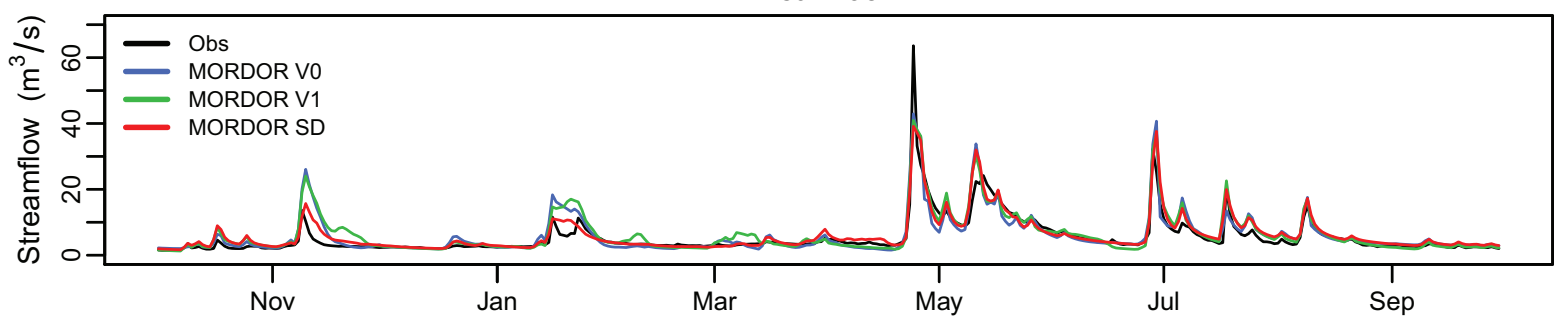

Year 1982

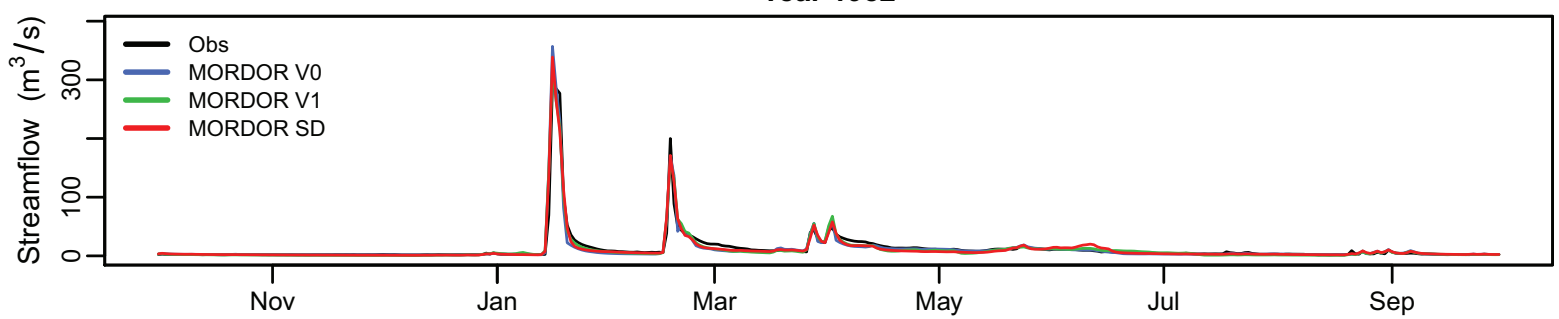

Year 1983

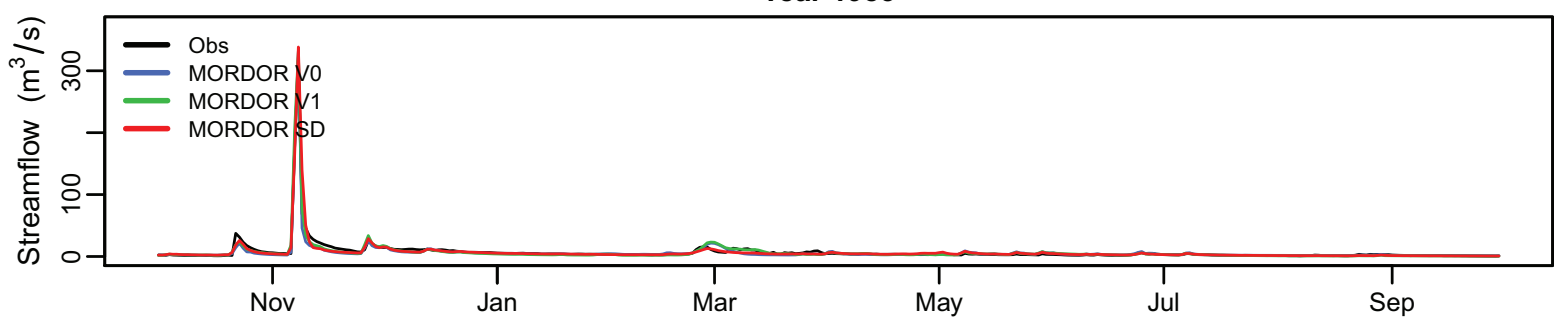

# Tech@Reynes

Year 1984

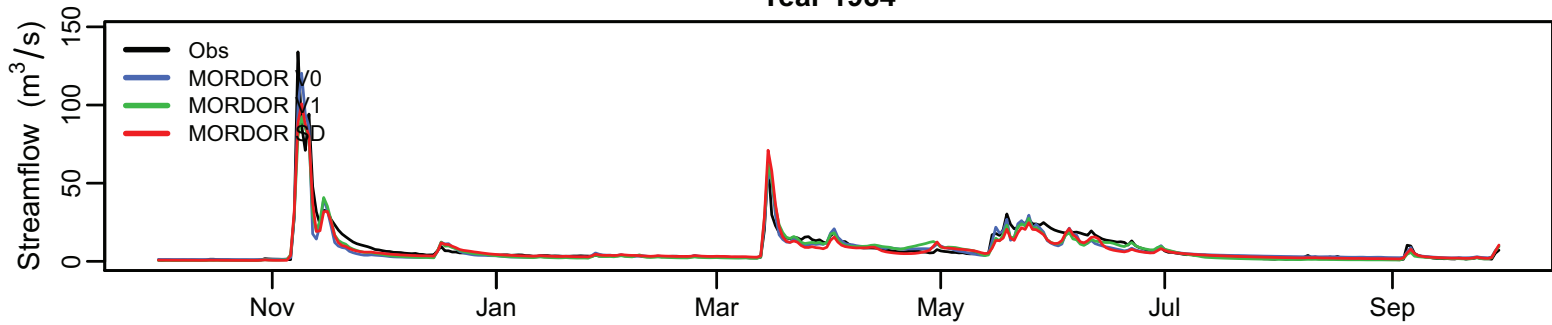

Year 1985

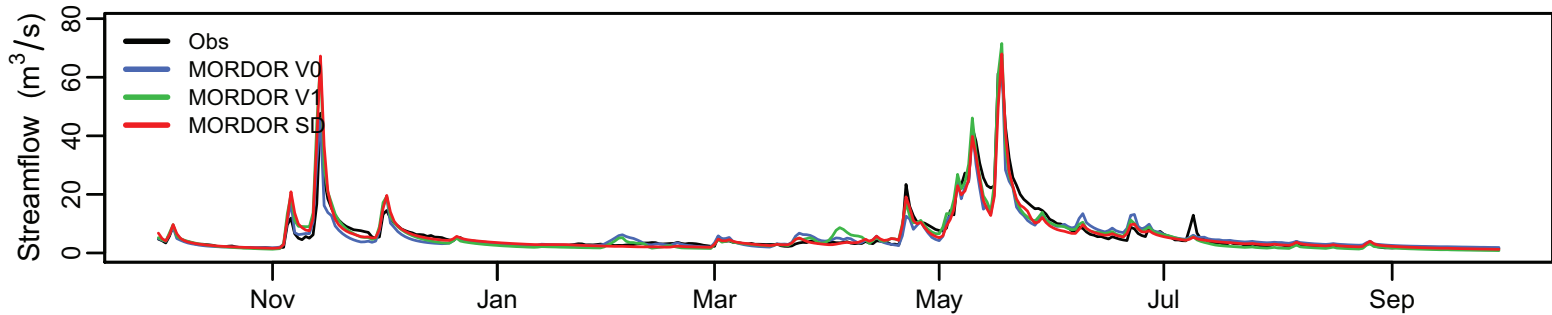

# Tet@Vinca

Year 1983

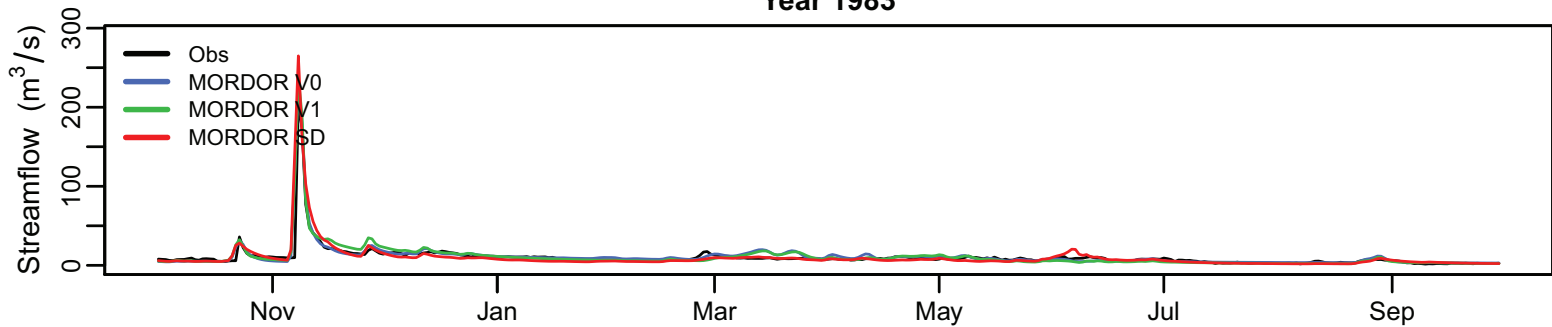

Year 1984

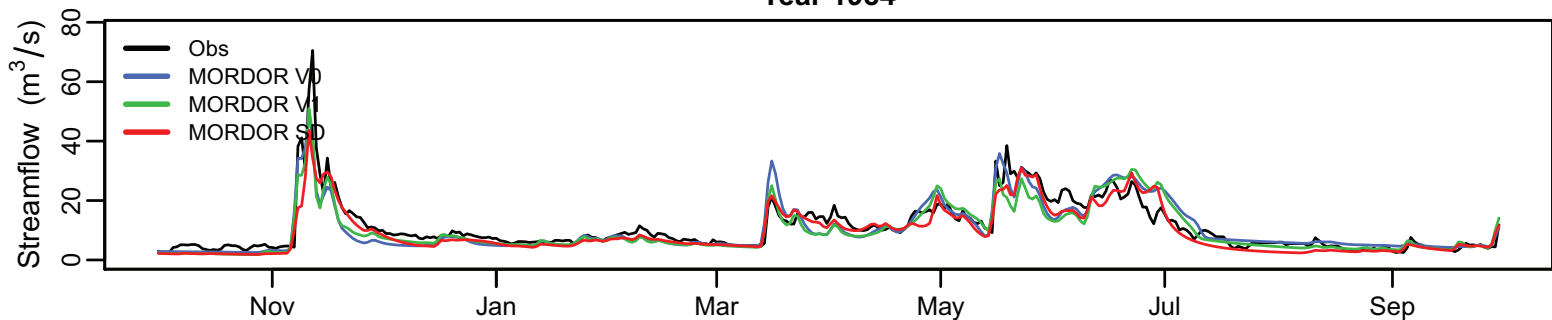

Year 1985

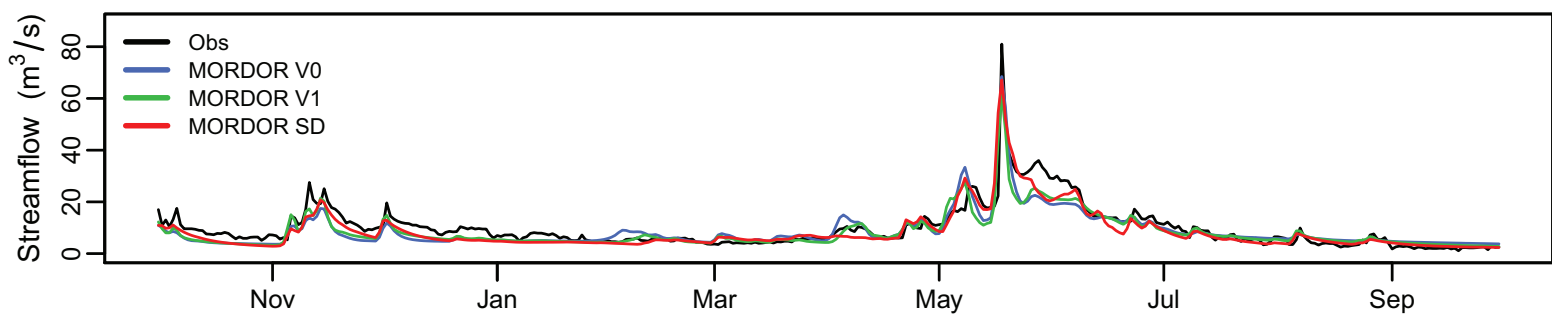

Year 1986

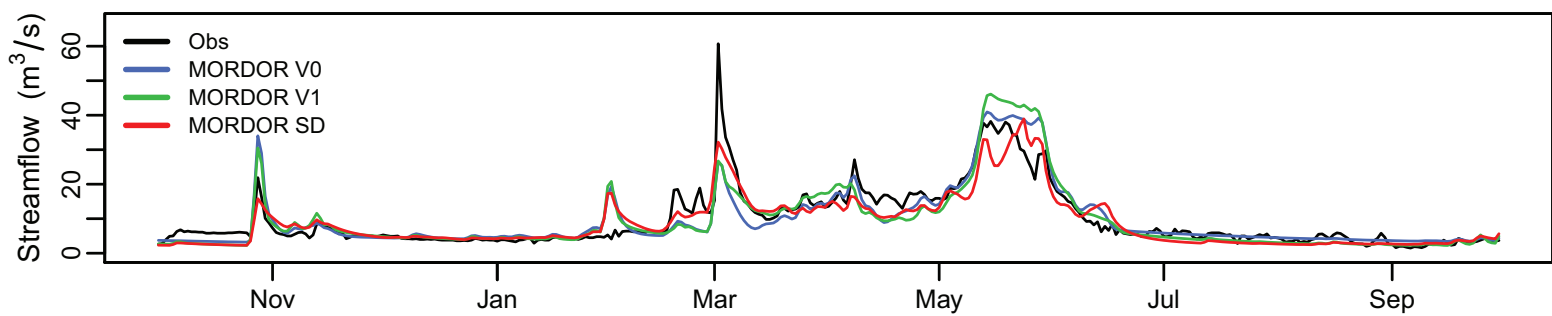

Year 1987

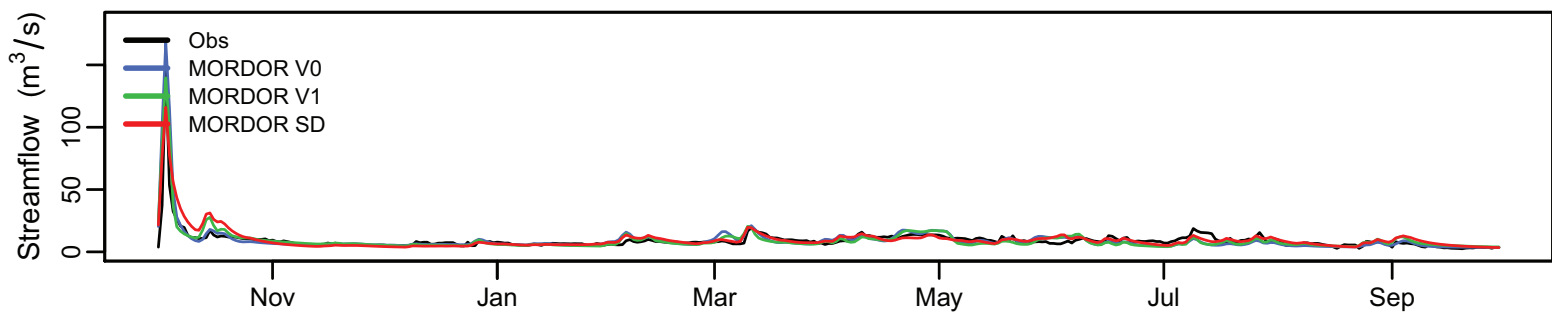

Year 1988

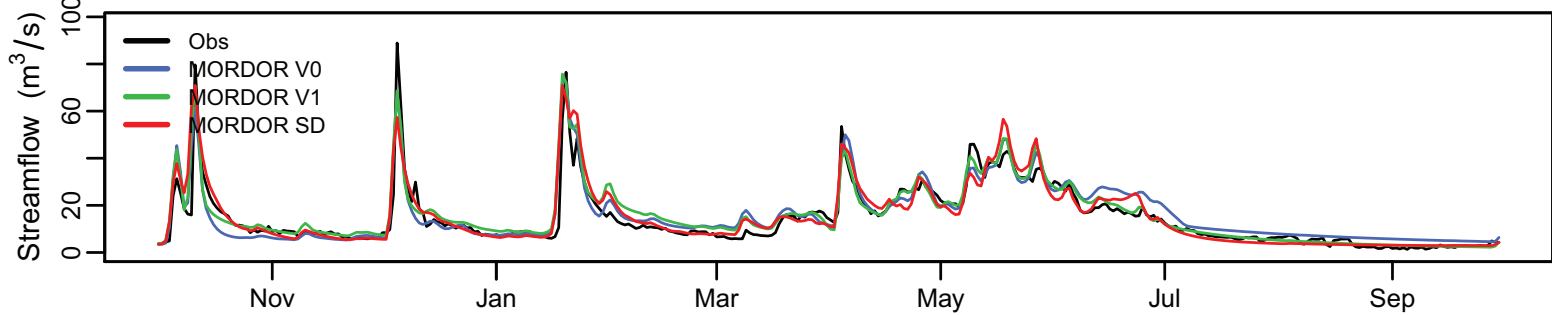



# Tet@Vinca

Year 1989

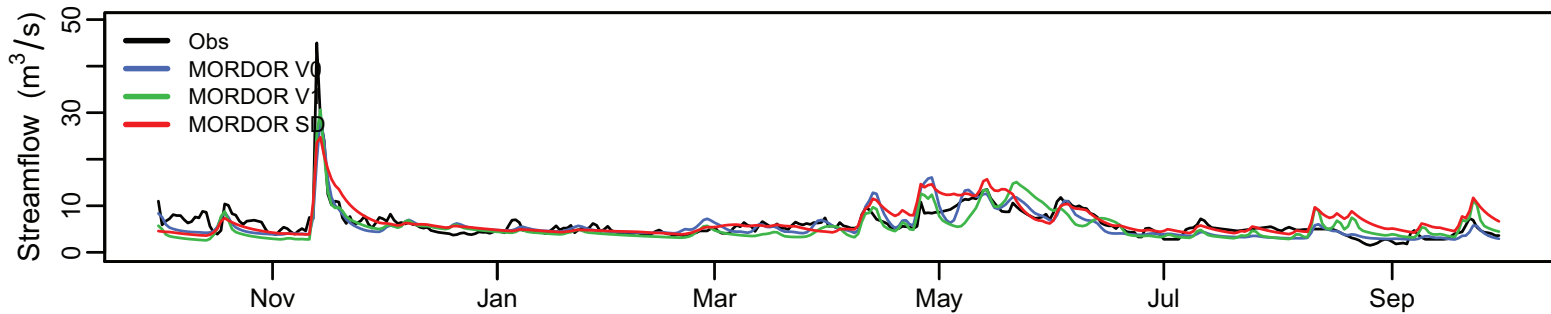

Year 1990

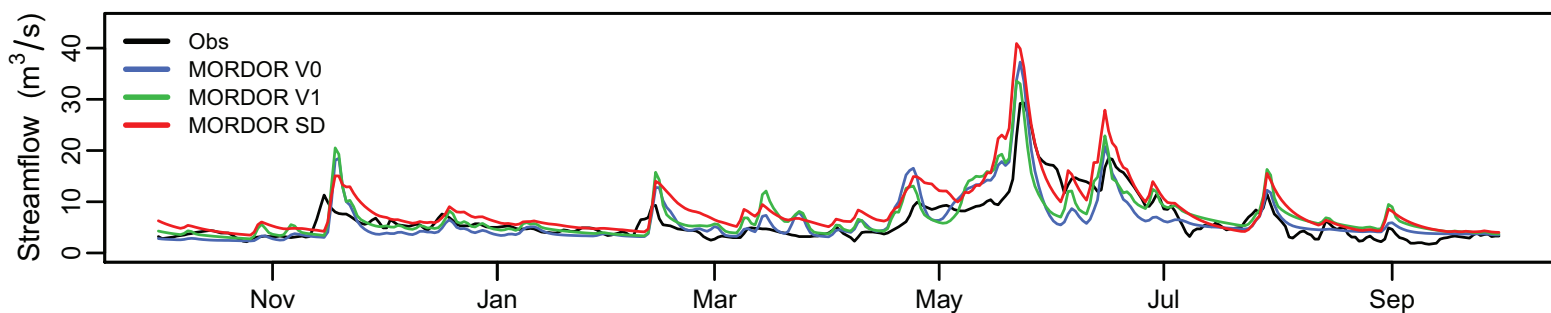

Year 1991

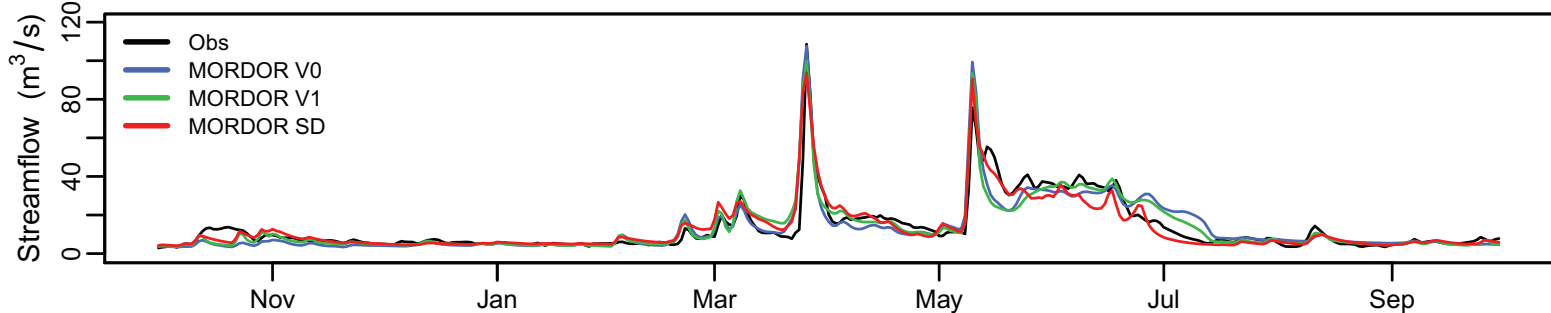

Year 1992

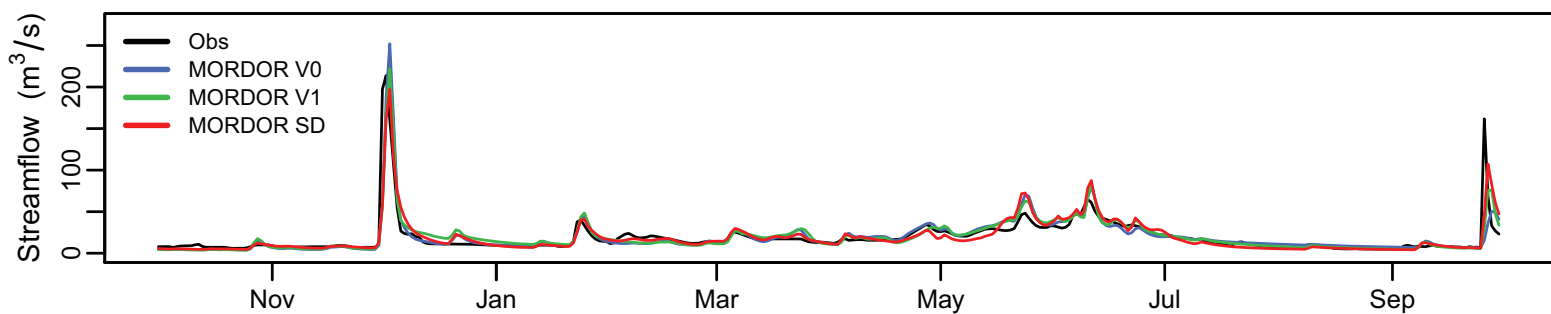

Year 1993

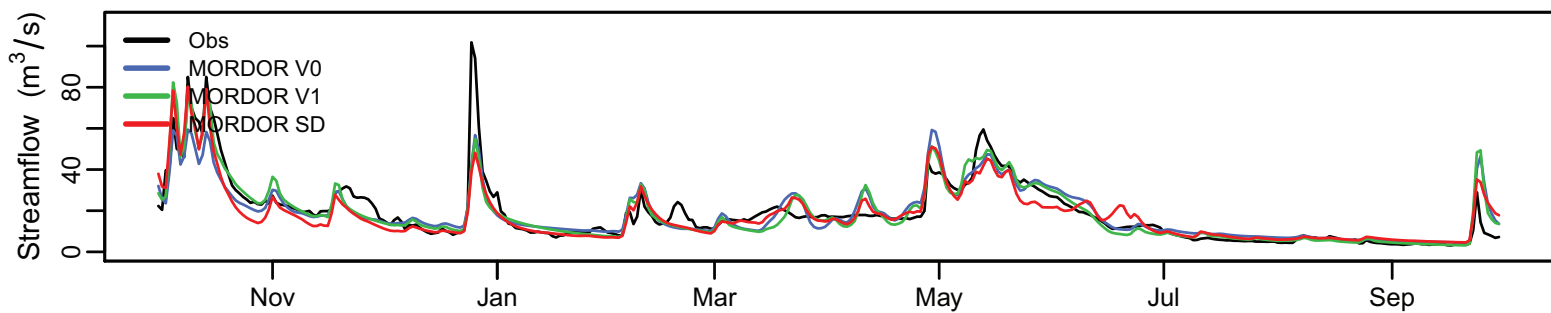

Year 1994

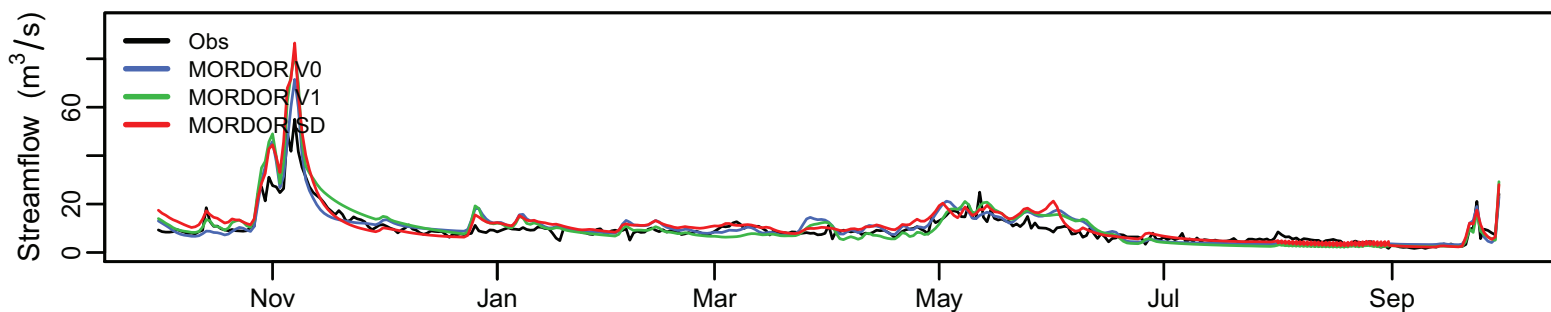

# Tet@Vinca

Year 1995

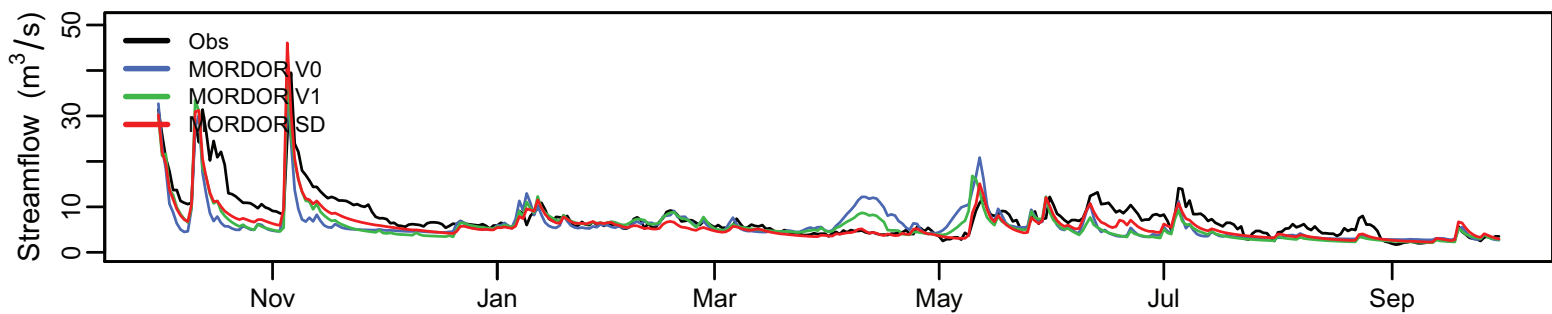

Year 1996

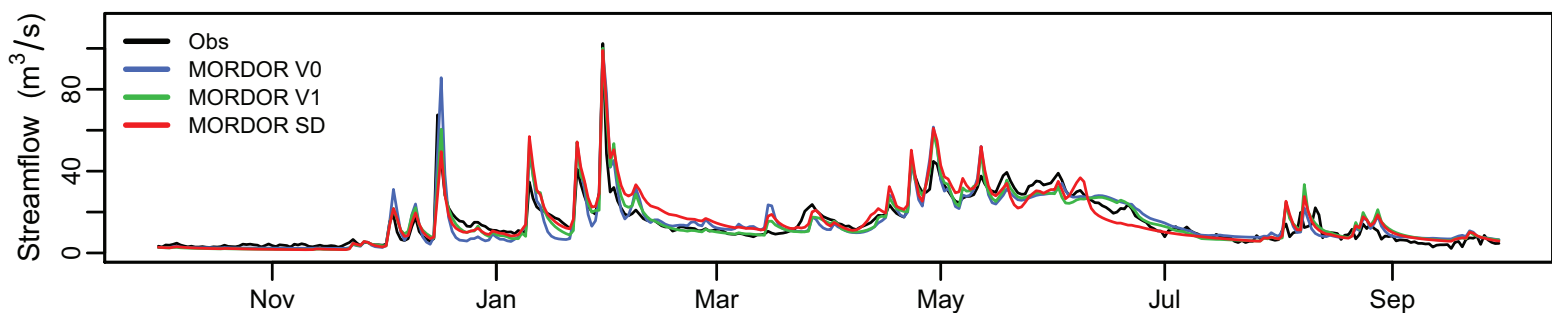

Year 1997

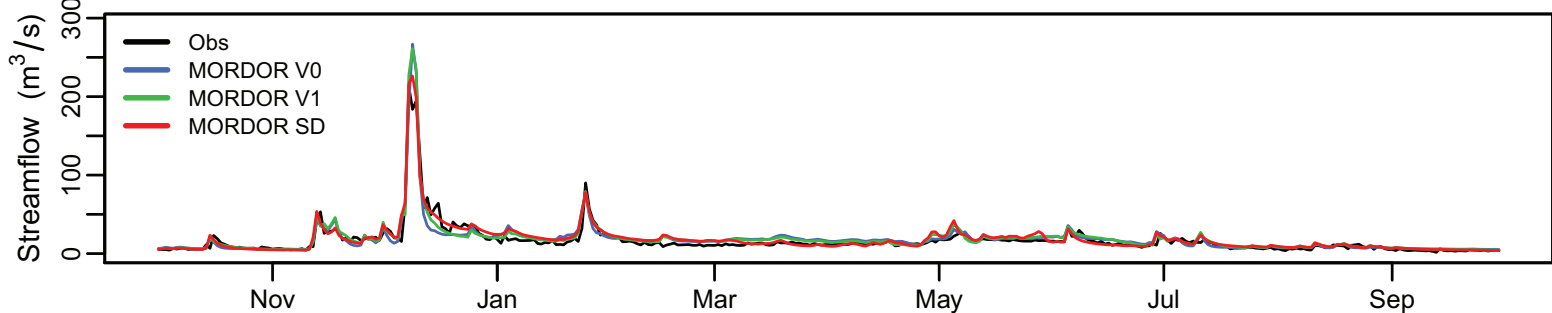

Year 1998

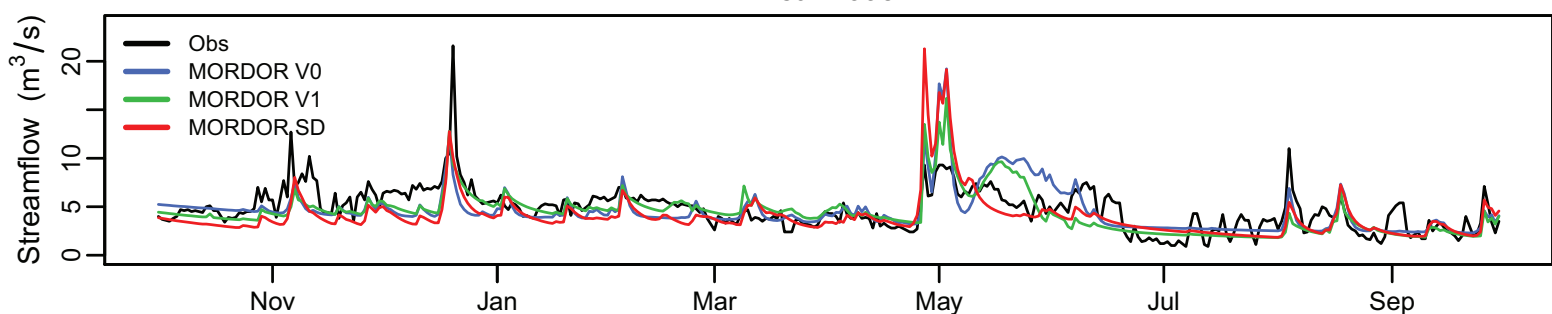

Year 1999

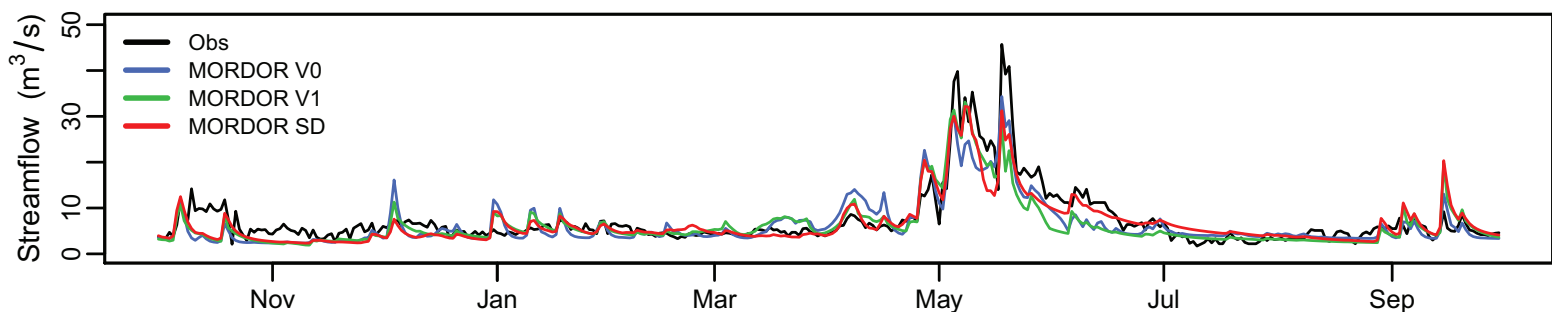

Year 2000

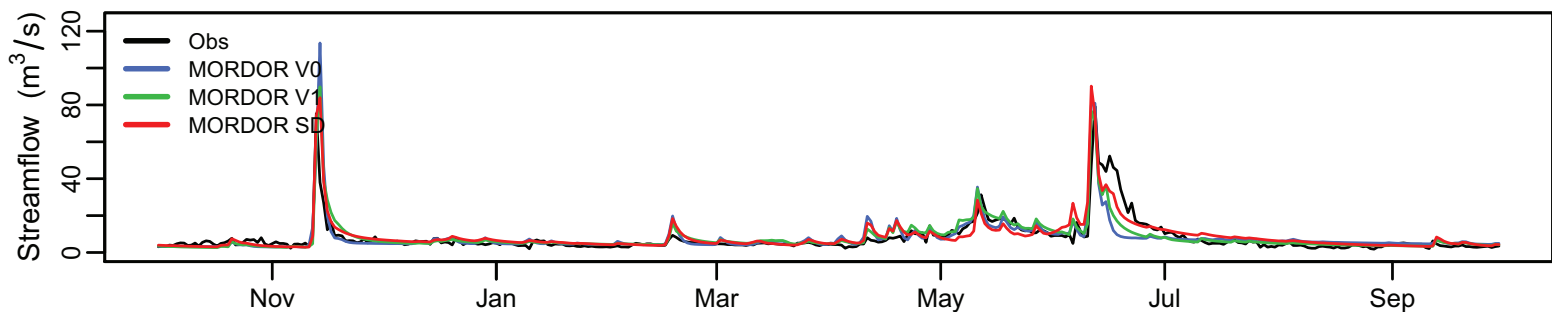

# Tet@Vinca

Year 2001

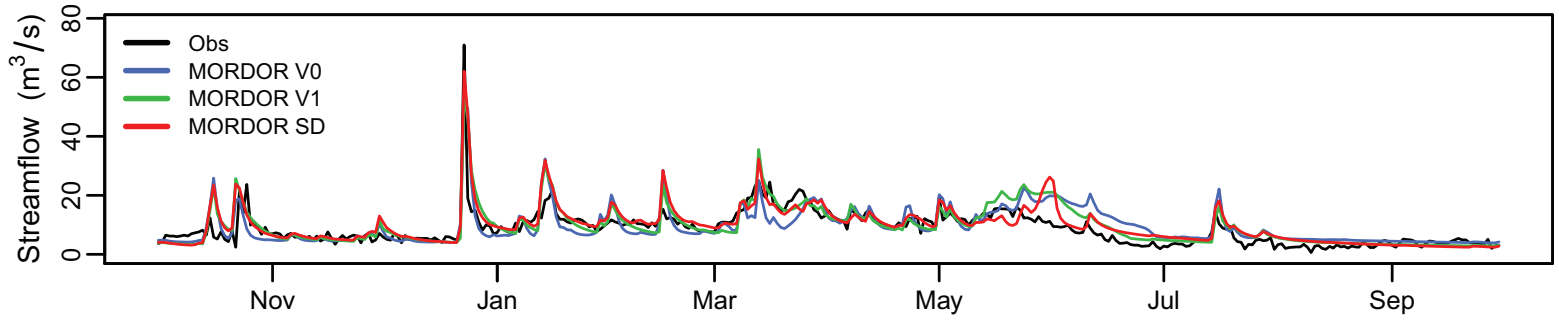

## Year 2002

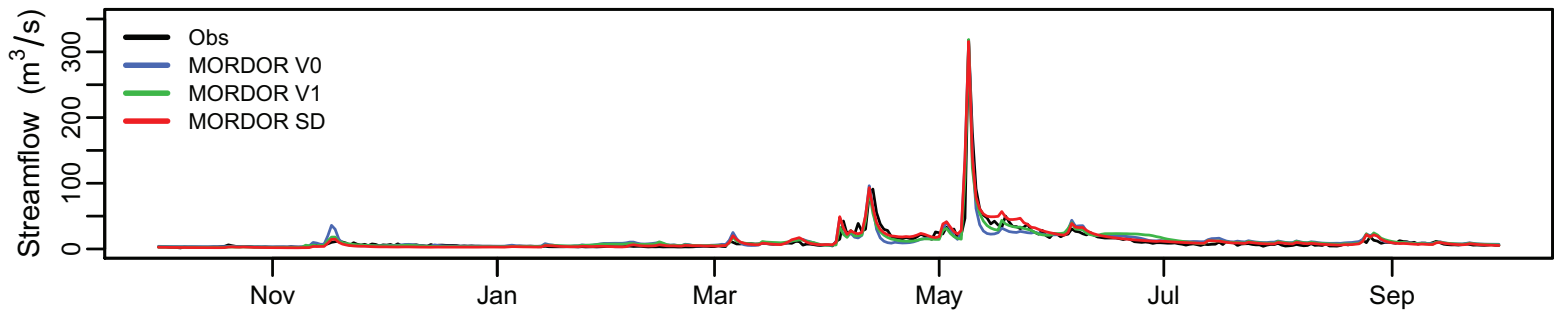

## Year 2003

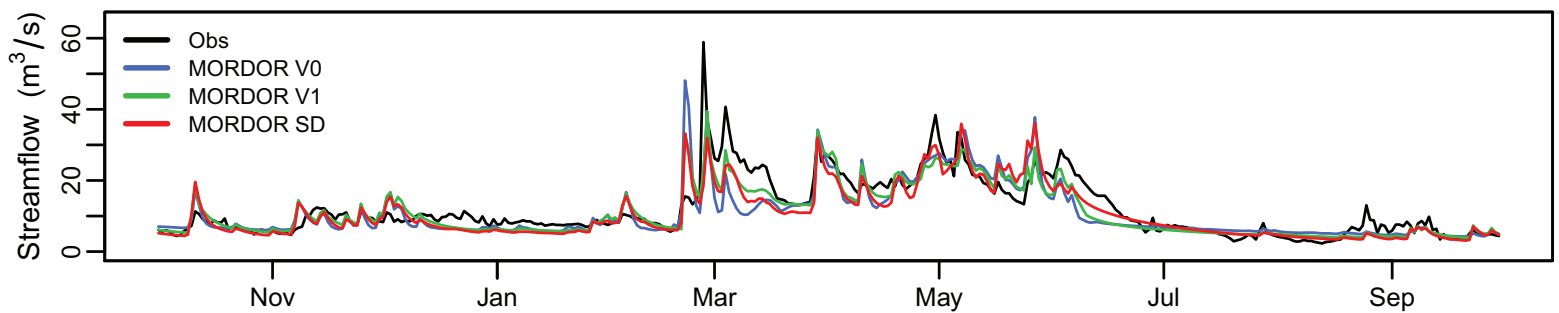

## Year 2004

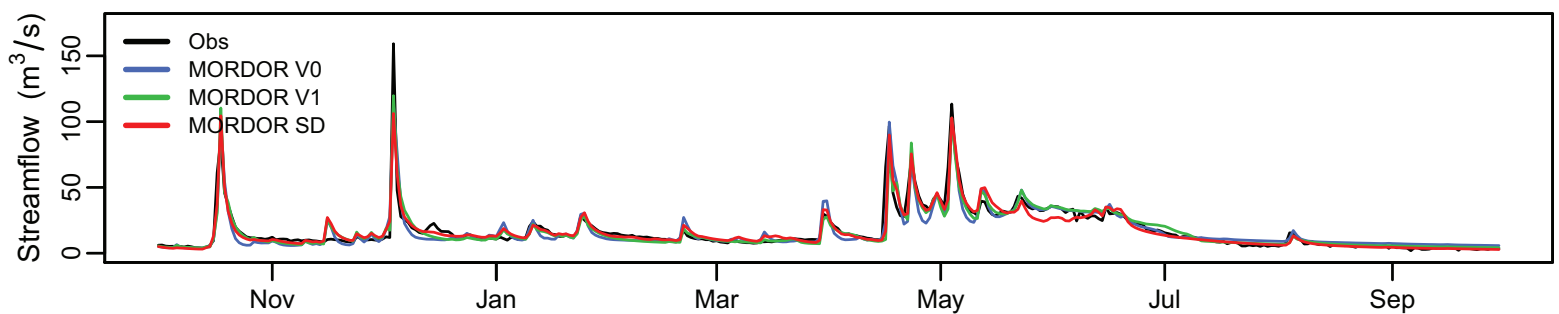

## Year 2005

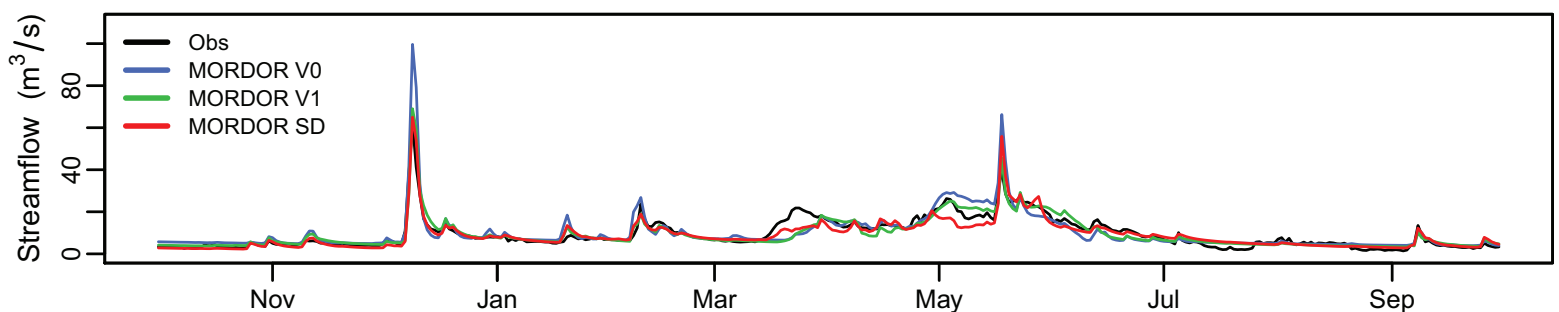

## Year 2006

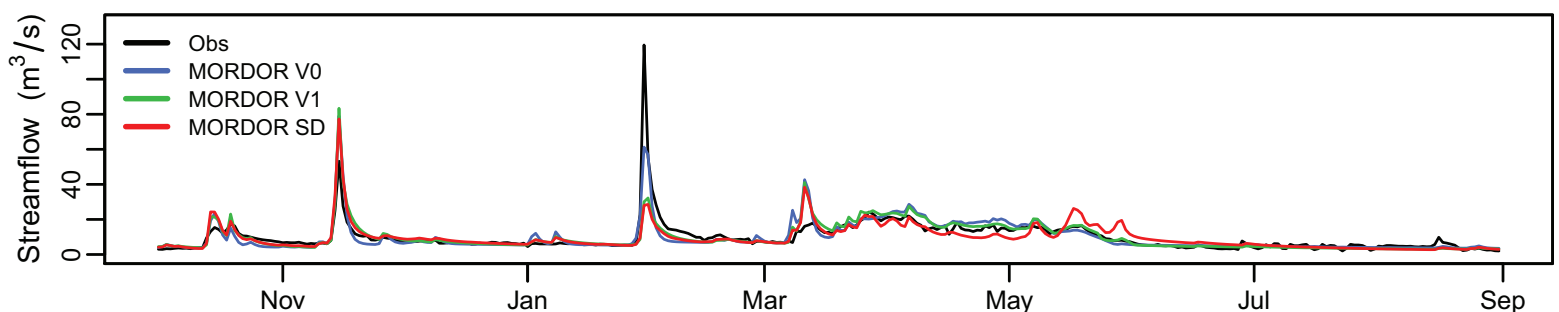

# Tinee@PontLune

Year 1982

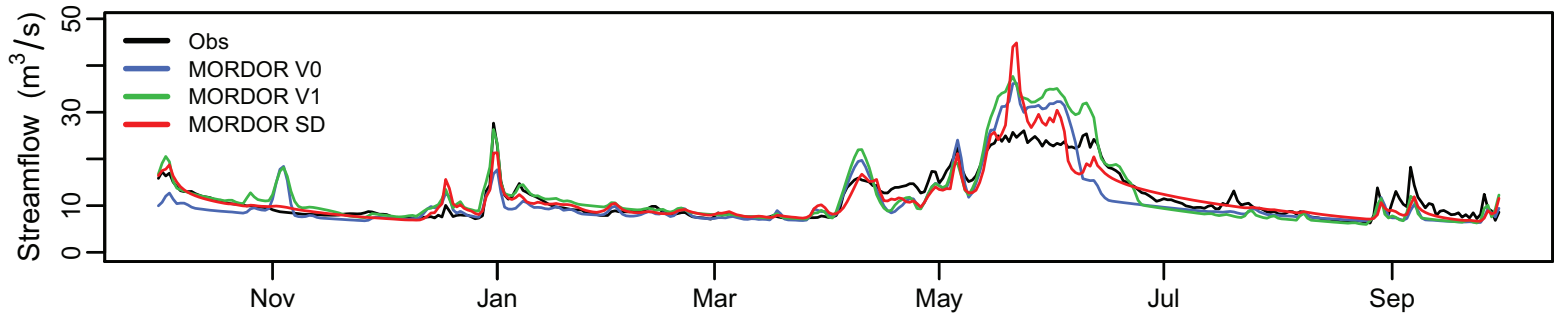

Year 1983

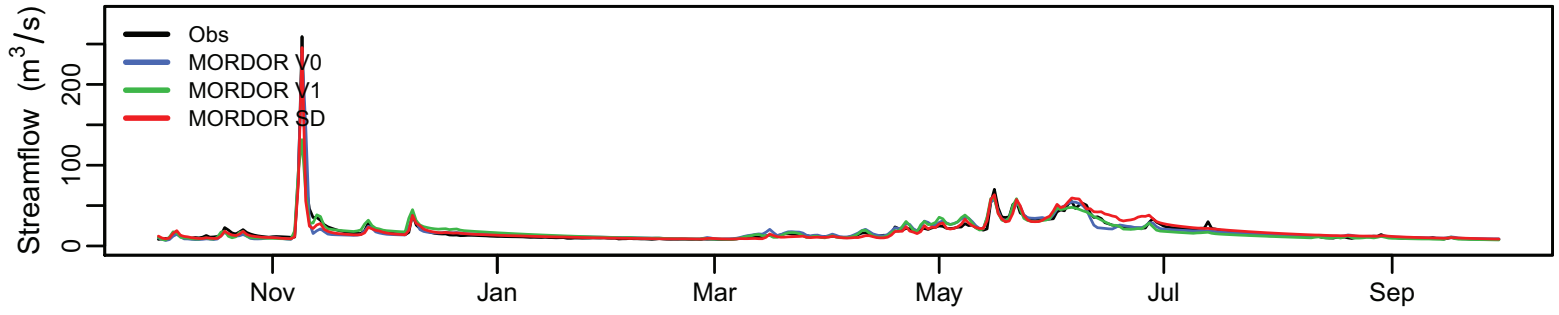

Year 1984

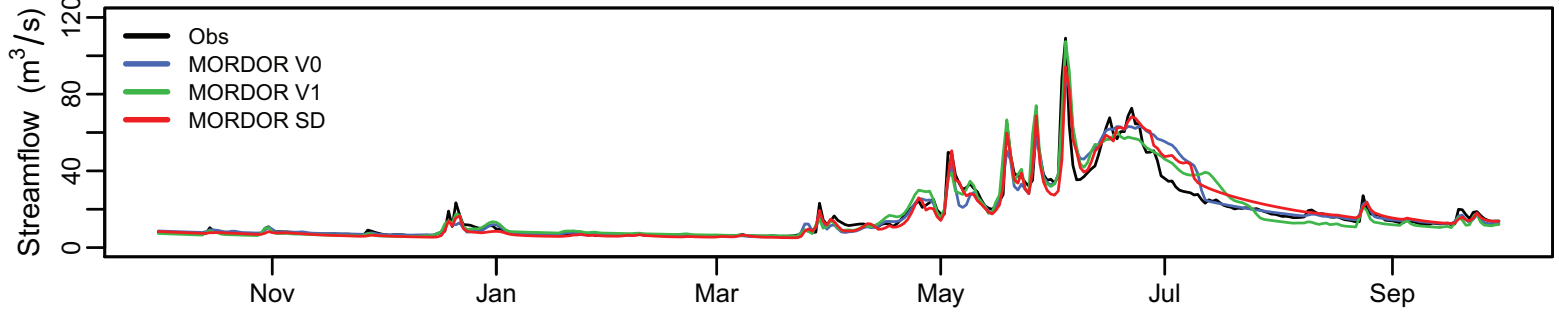

Year 1985

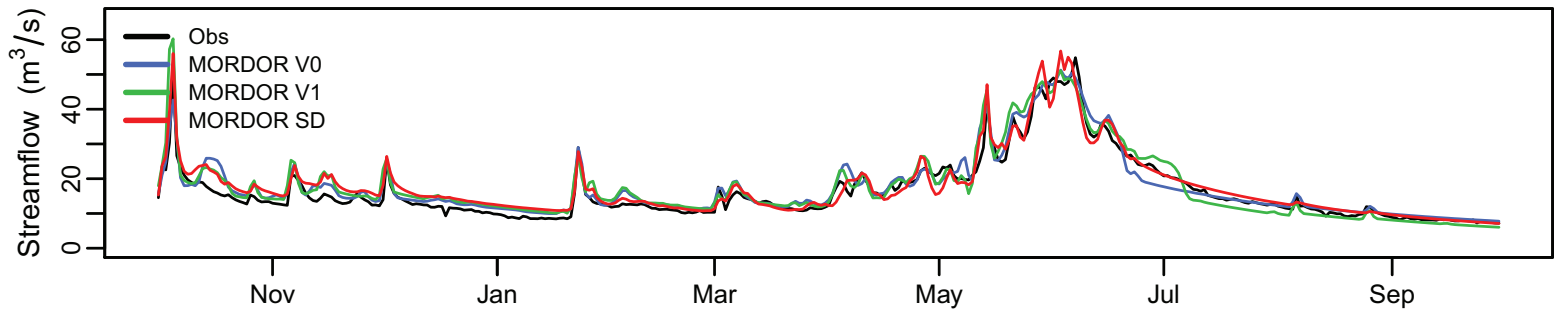

Year 1986

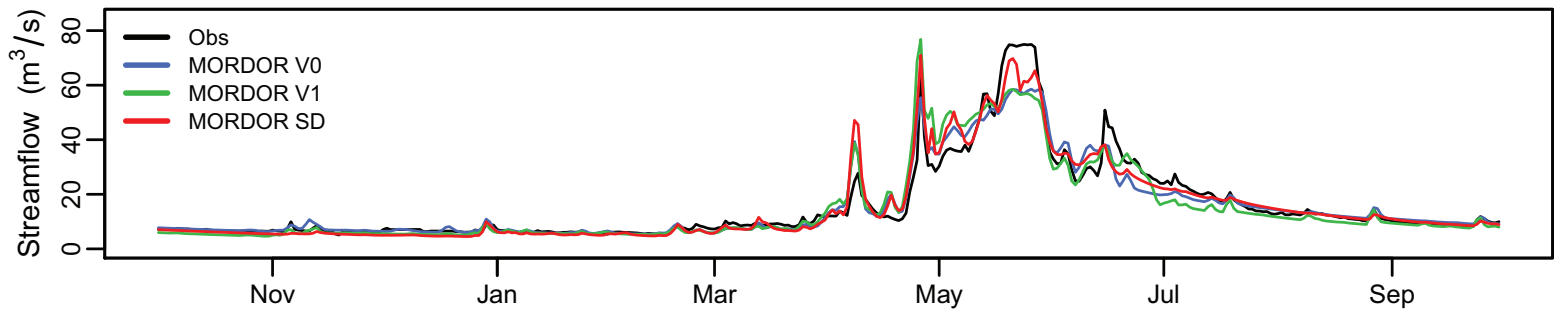

Year 1987

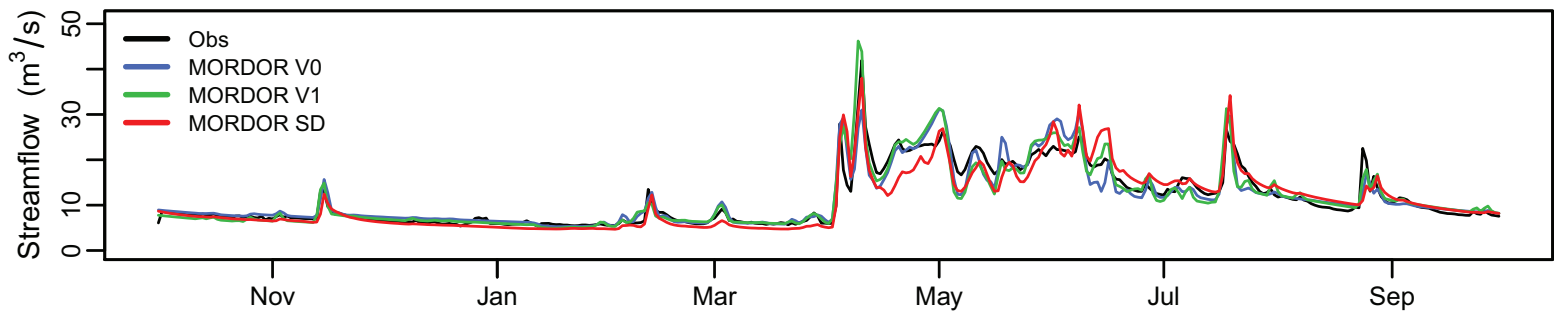

# Tinee@PontLune

Year 1988

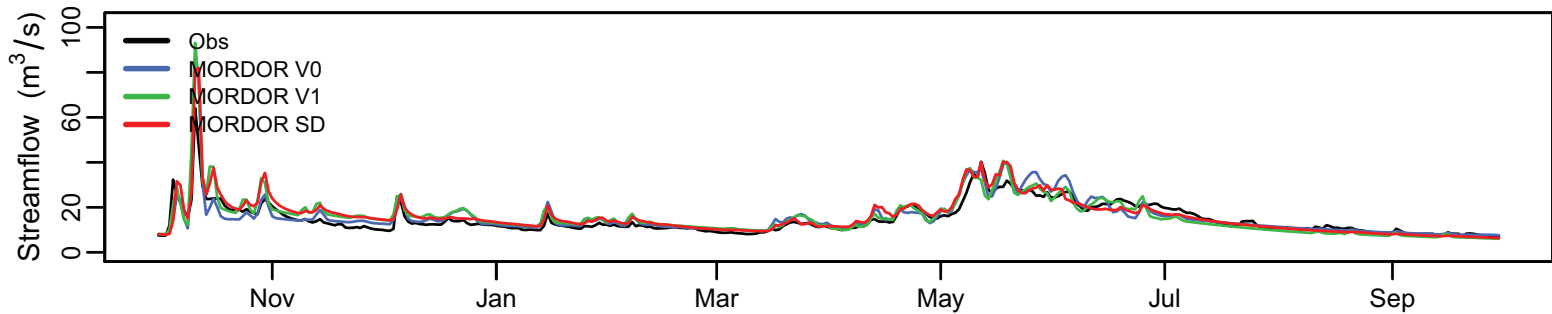

Year 1989

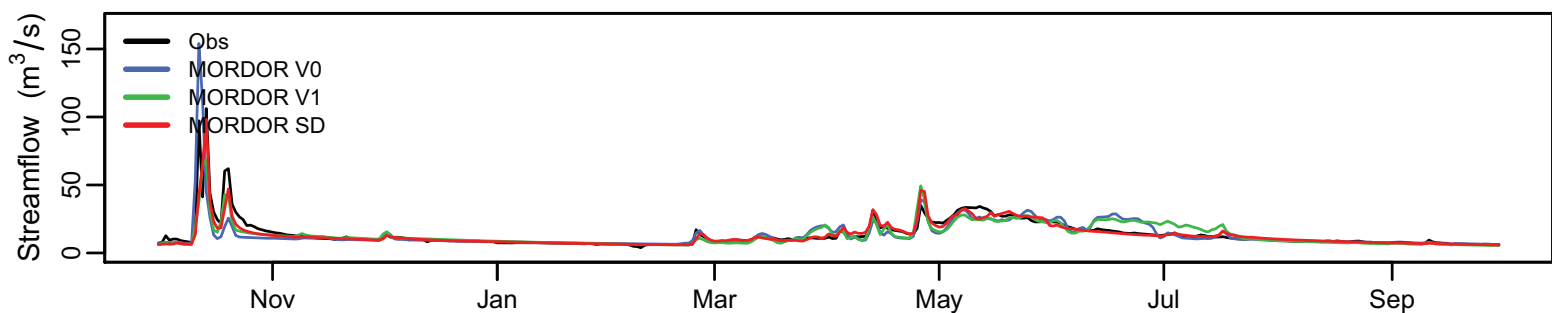

Year 1990

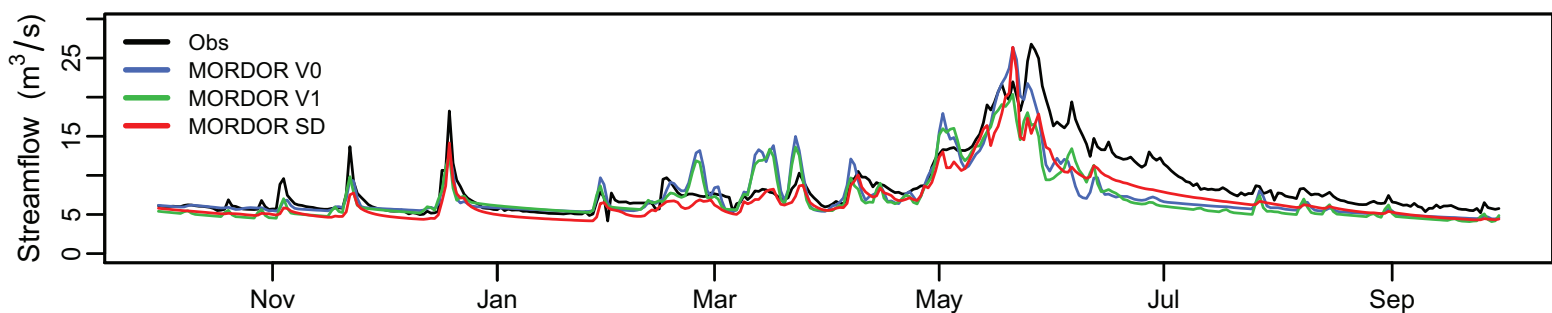

Year 1991

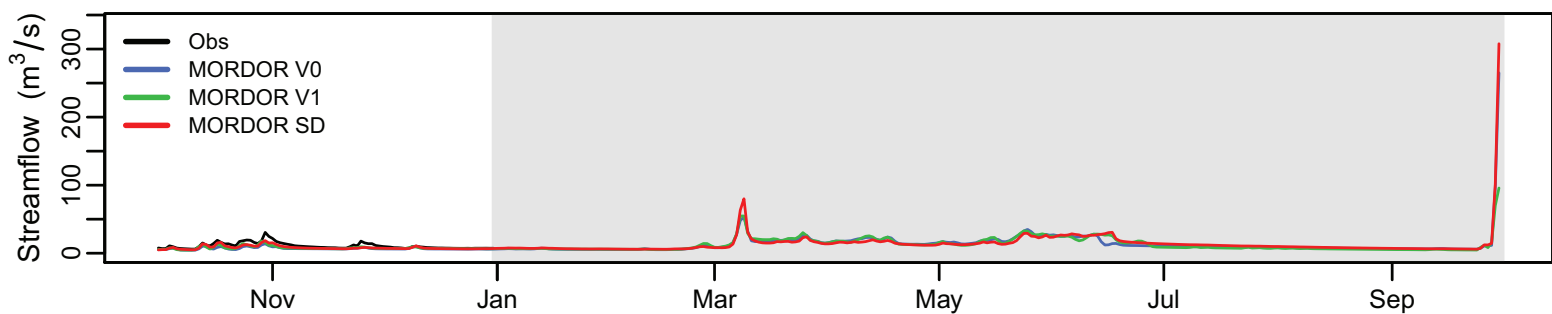

Year 1992

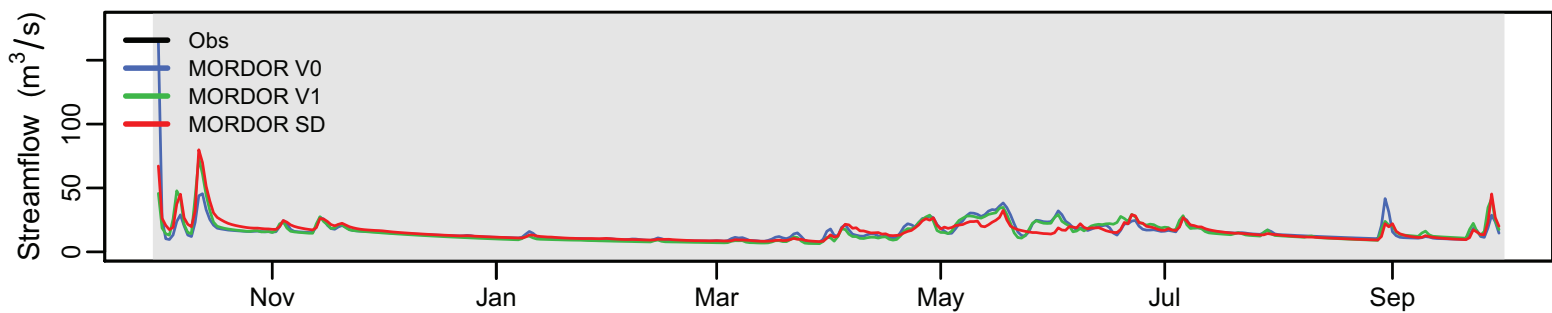

Year 1993

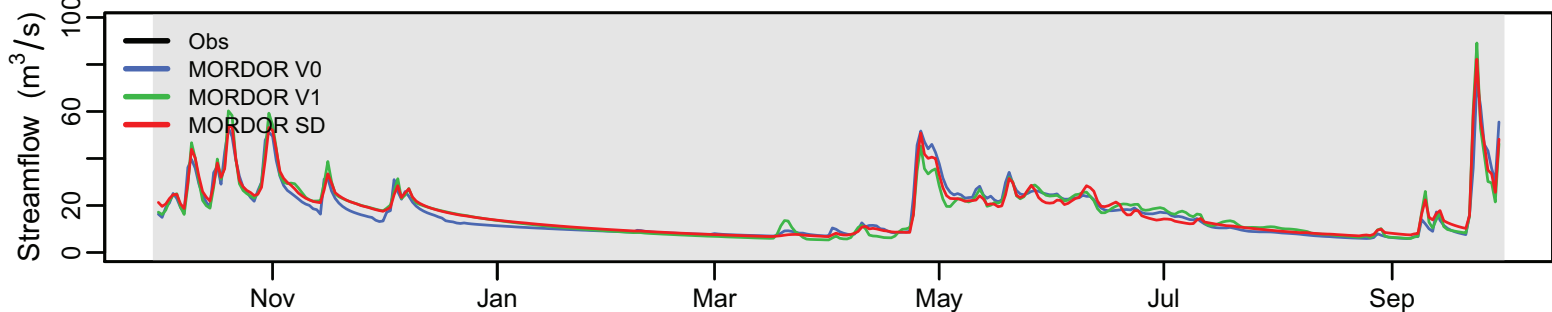

# Tinee@PontLune

Year 1994

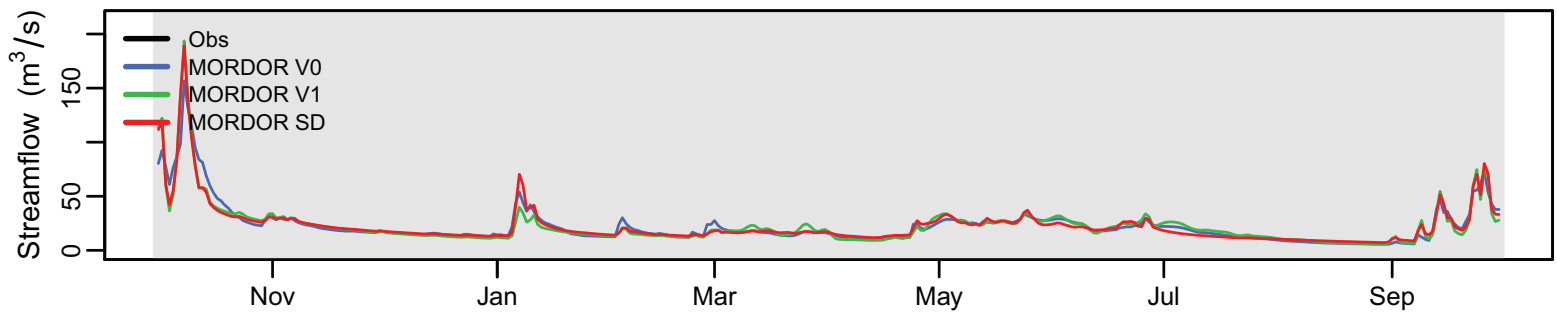

Year 1995

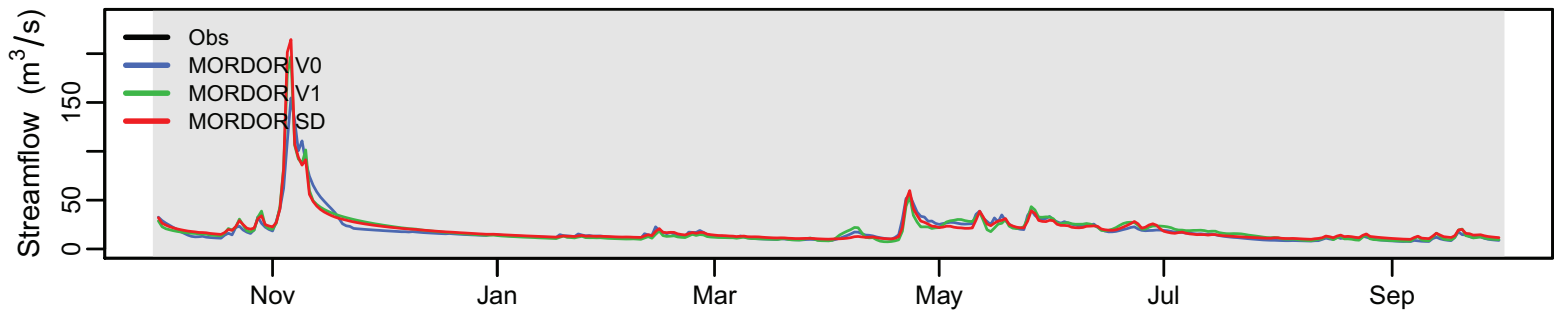

Year 1996

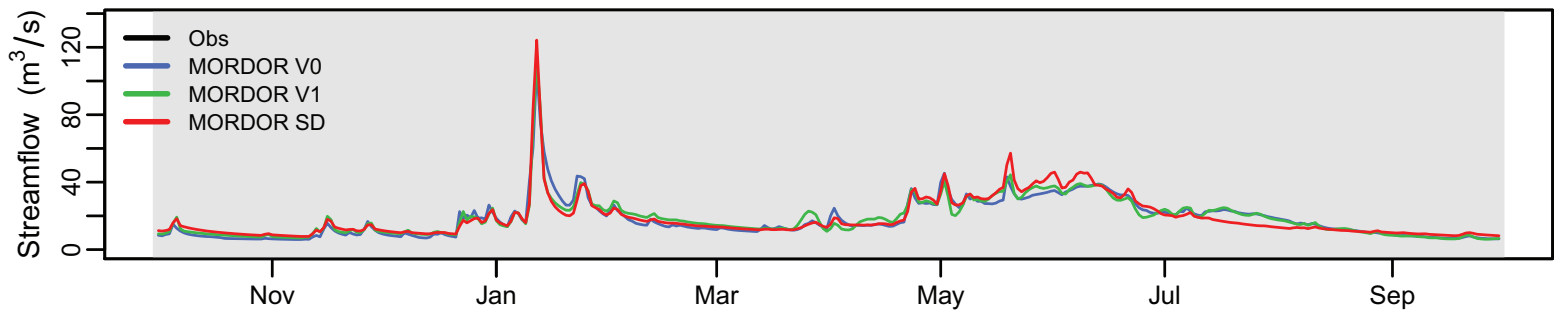

Year 1997

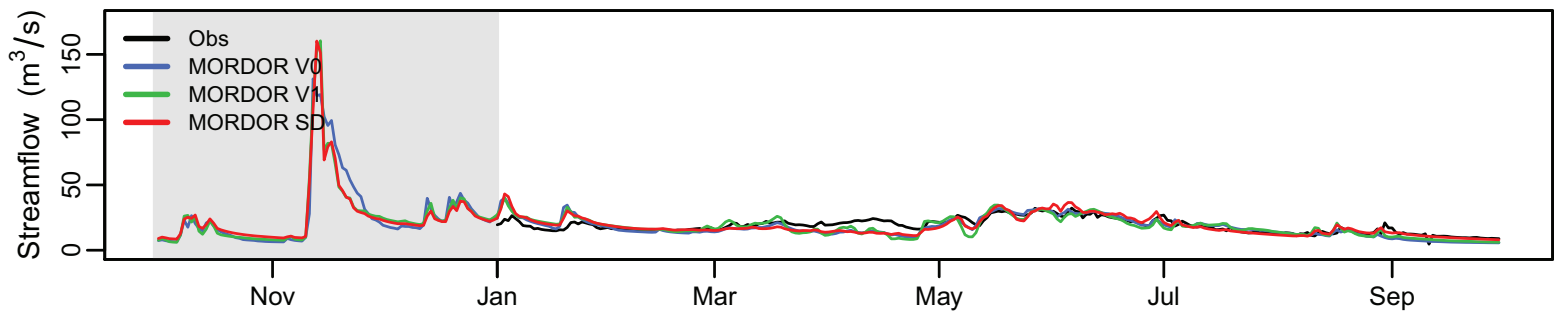

Year 1998

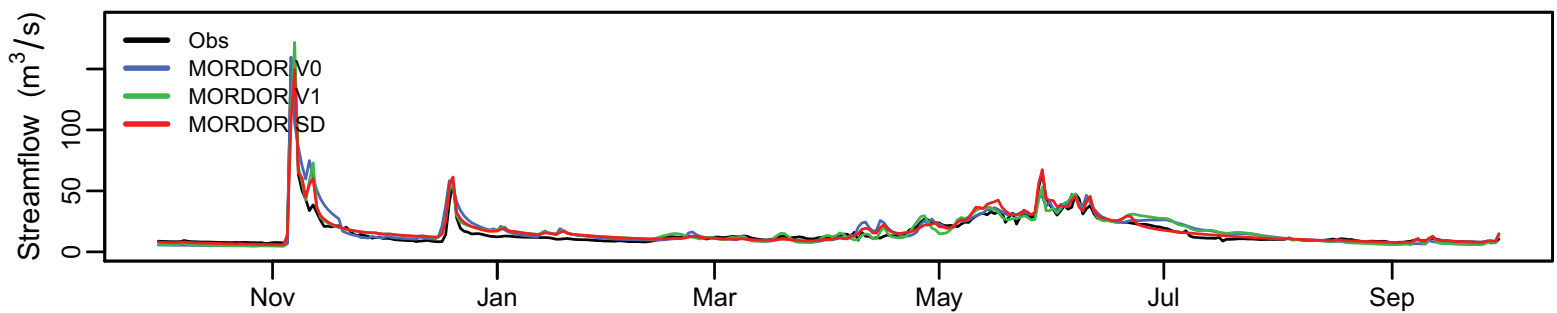

Year 1999

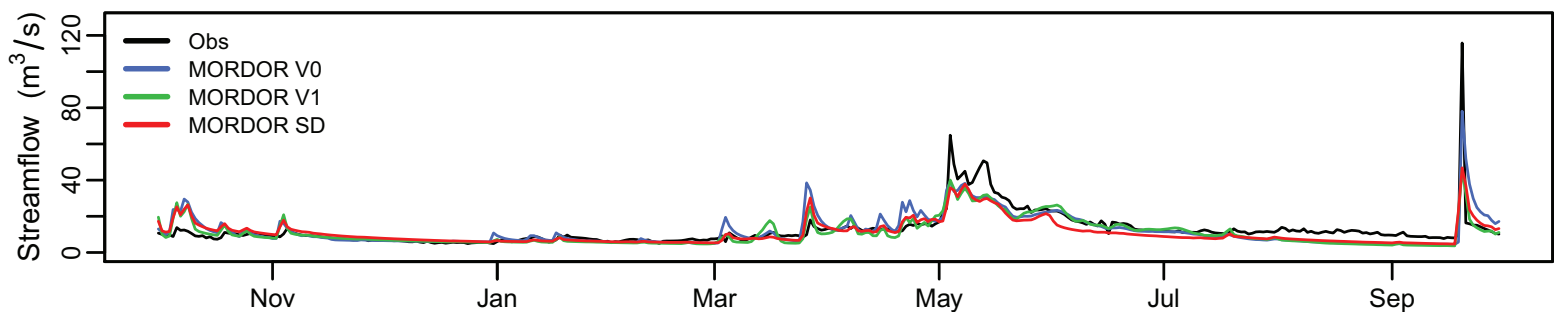

# Tinee@PontLune

Year 2000

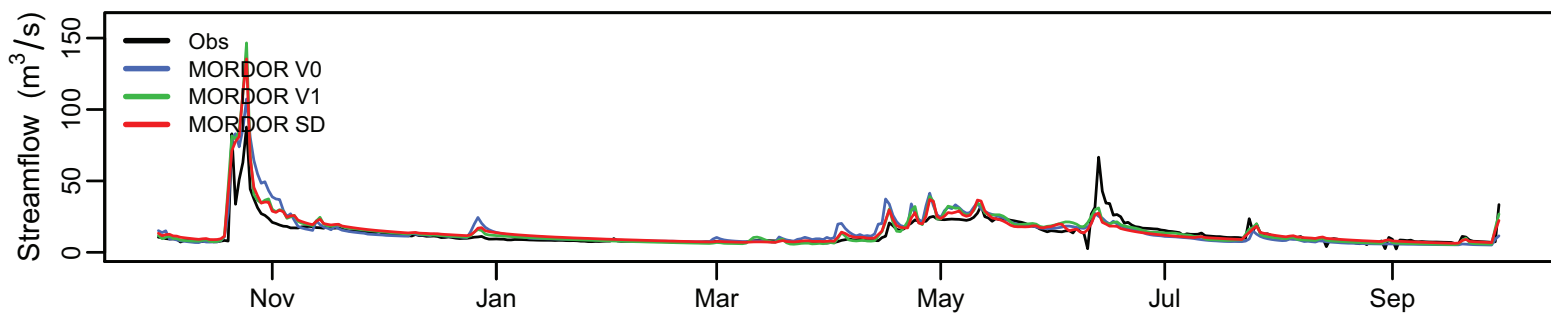

Year 2001

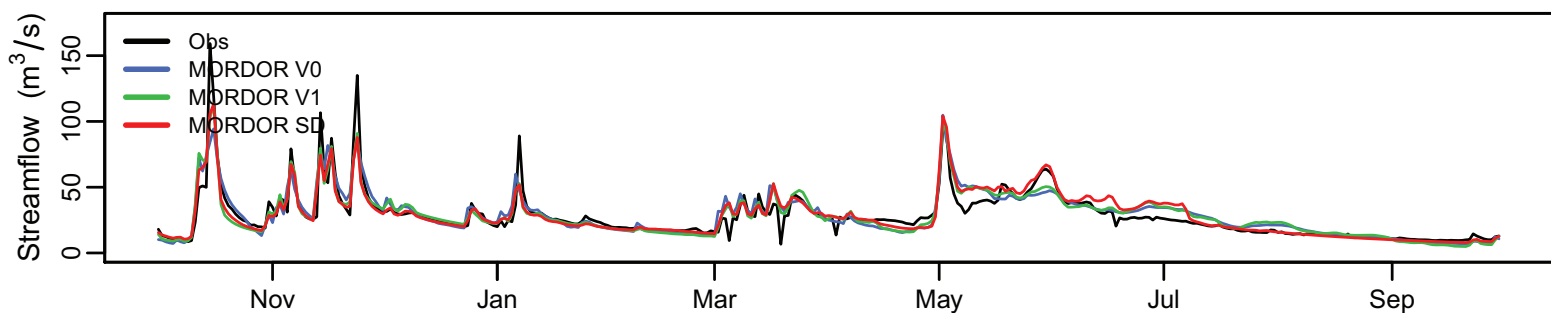

Year 2002

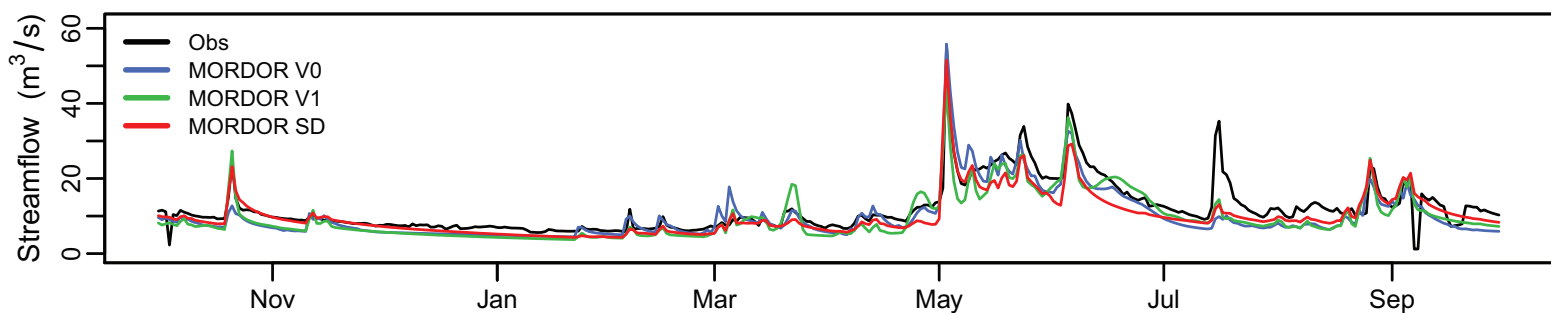

# Truyere@Grandval

Year 1974

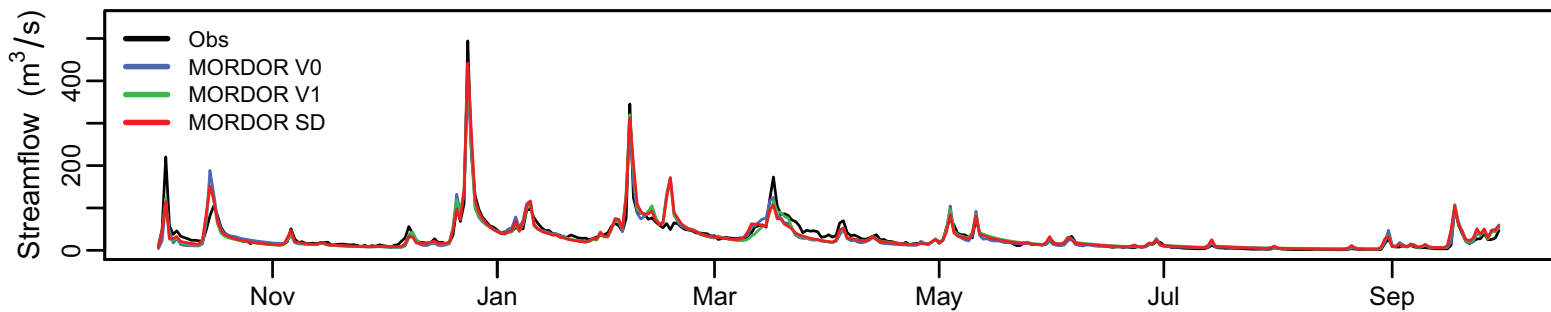

Year 1975

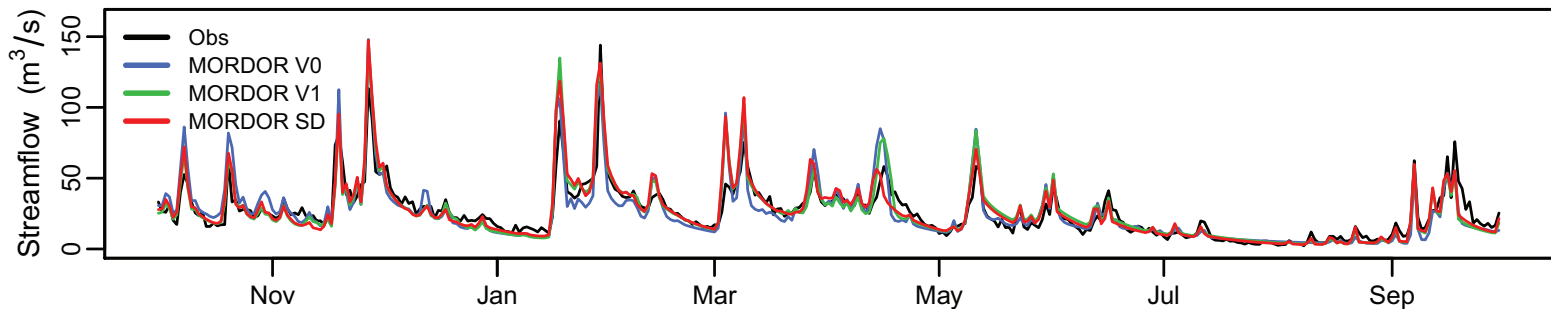

Year 1976

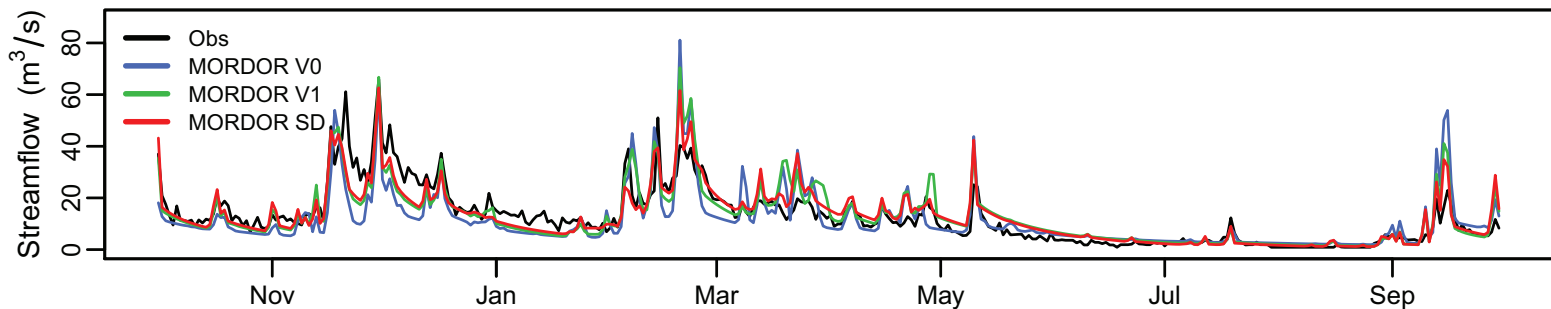

Year 1977

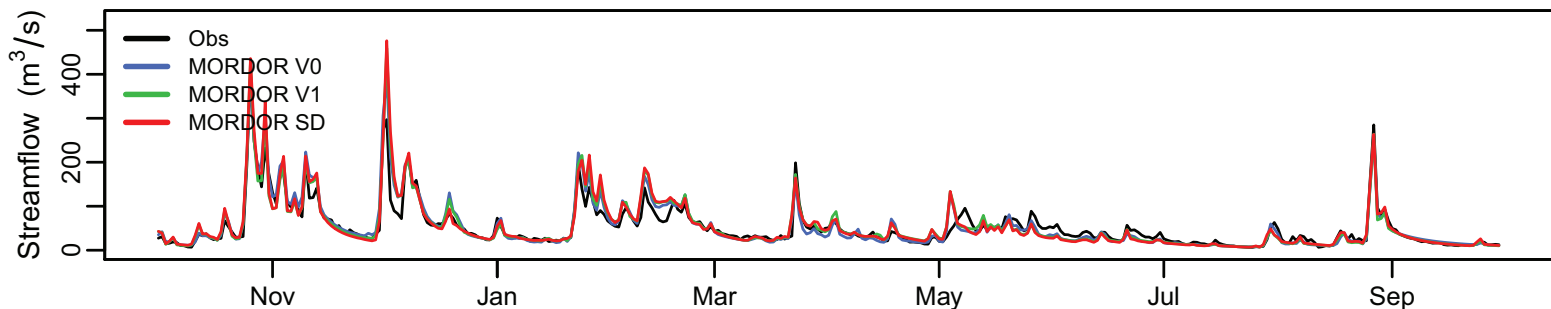

Year 1978

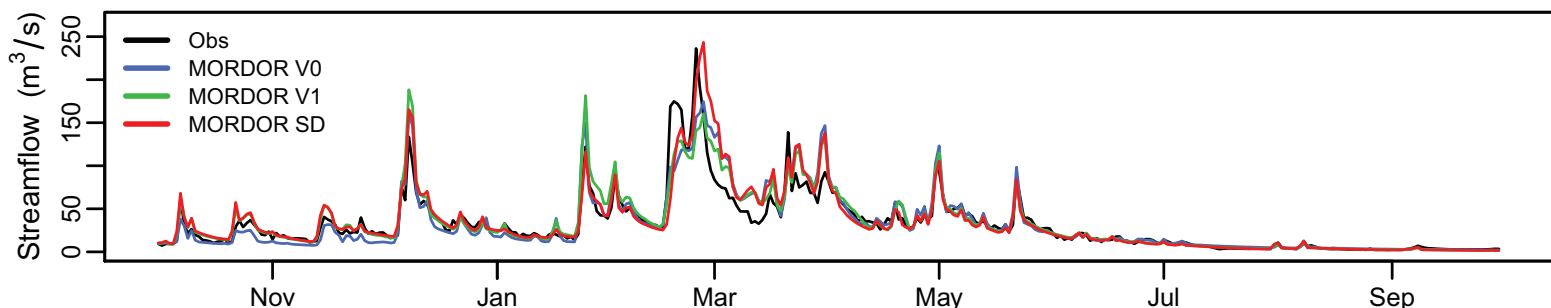

Year 1979

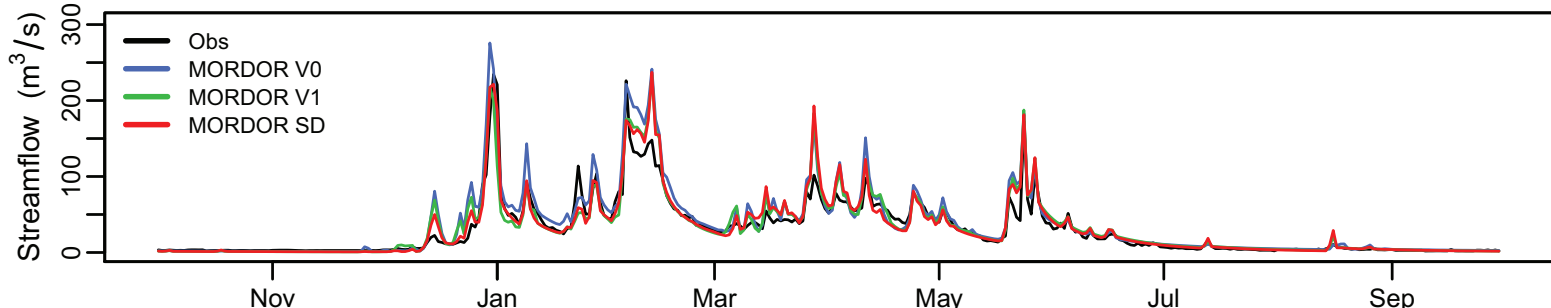



# Truyere@Grandval

Year 1980

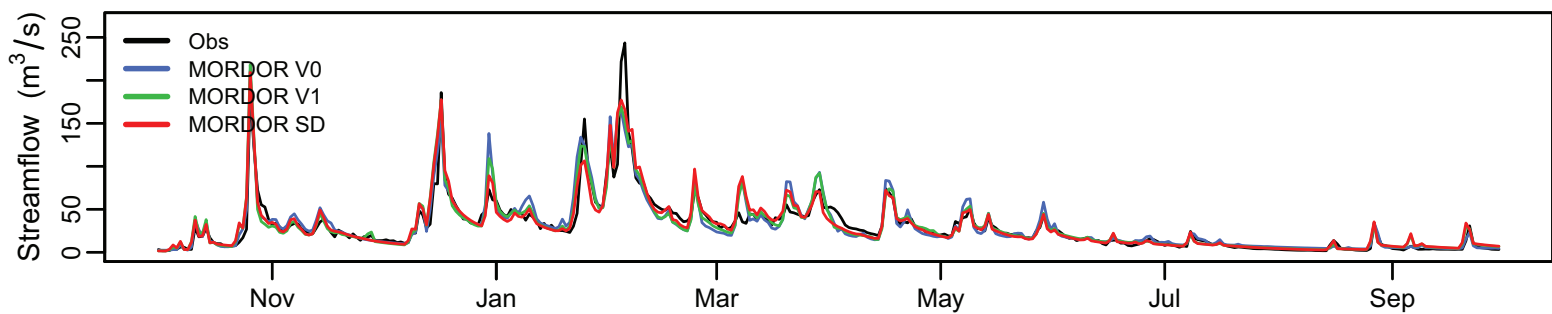

Year 1981

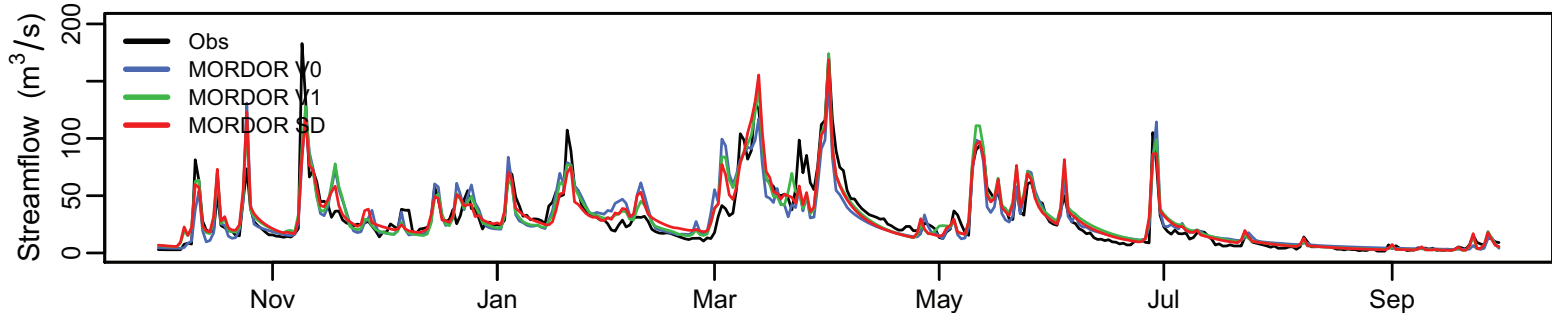

Year 1982

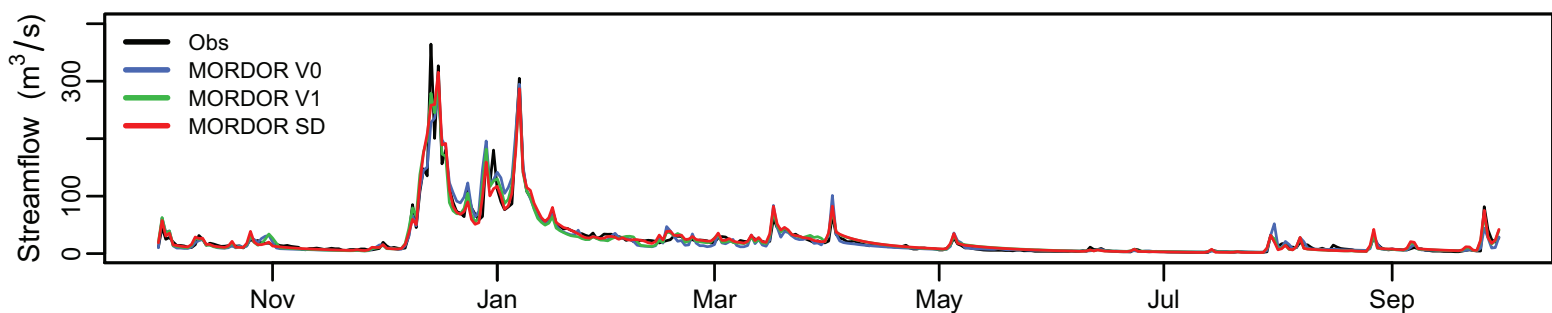

Year 1983

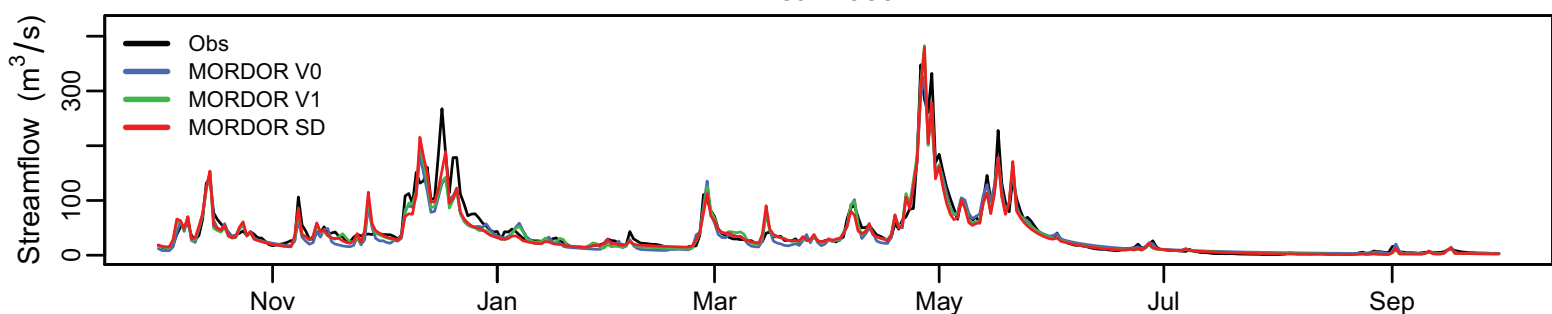

Year 1984

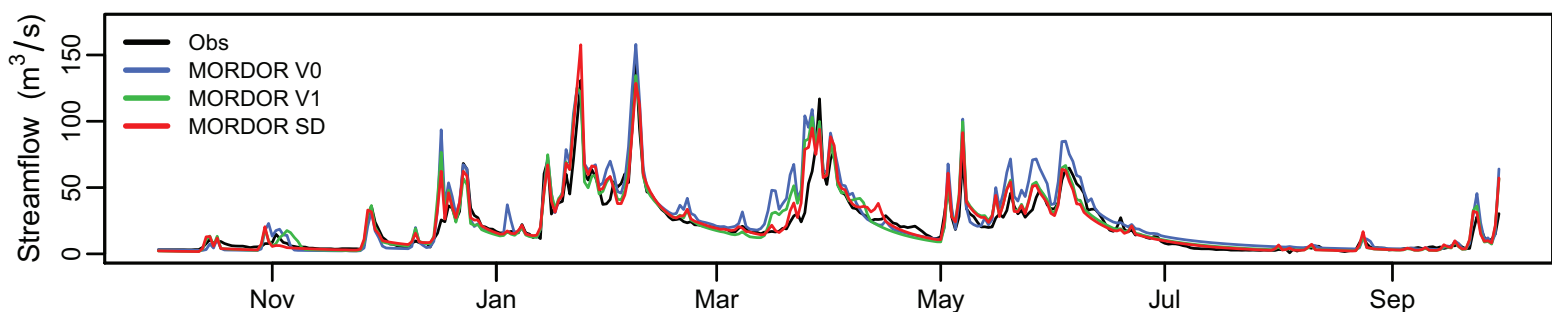

Year 1985

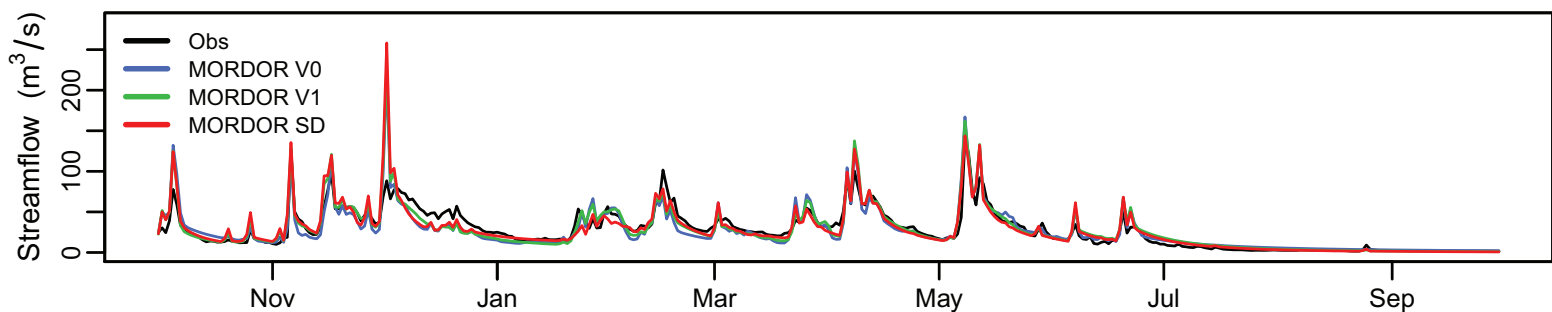

# Truyere@Grandval

Year 1986

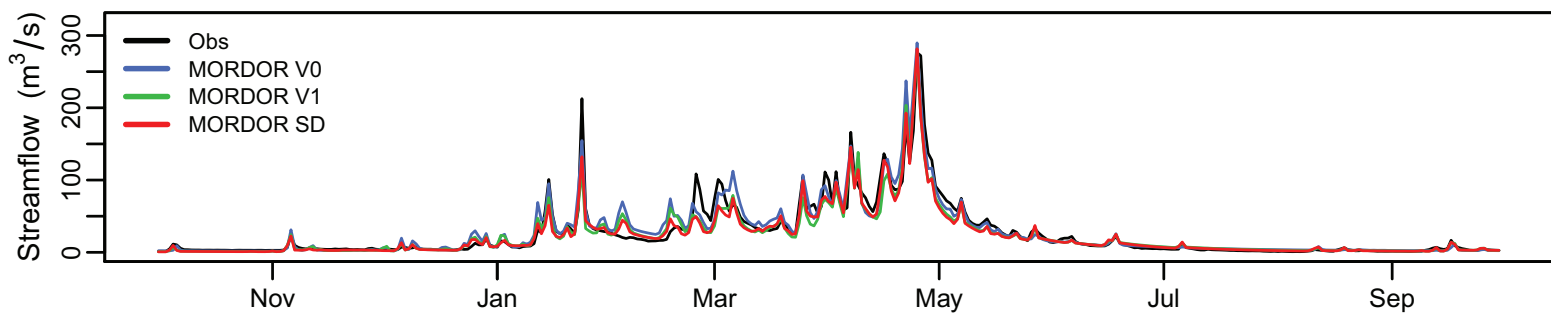

Year 1987

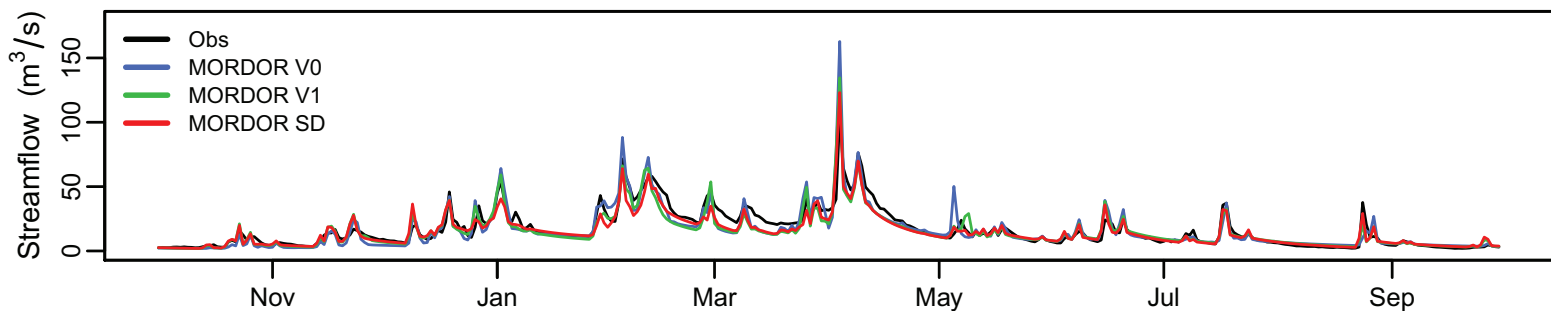

Year 1988

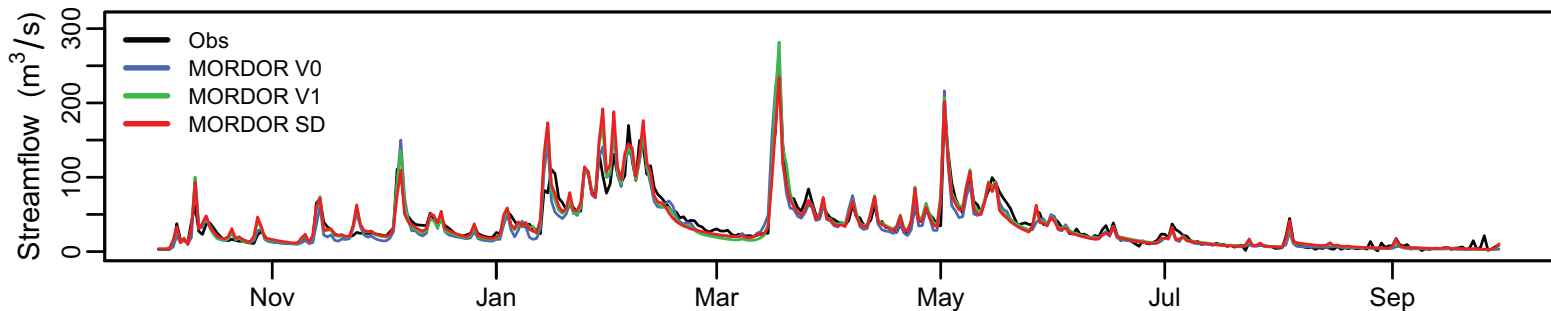

Year 1989

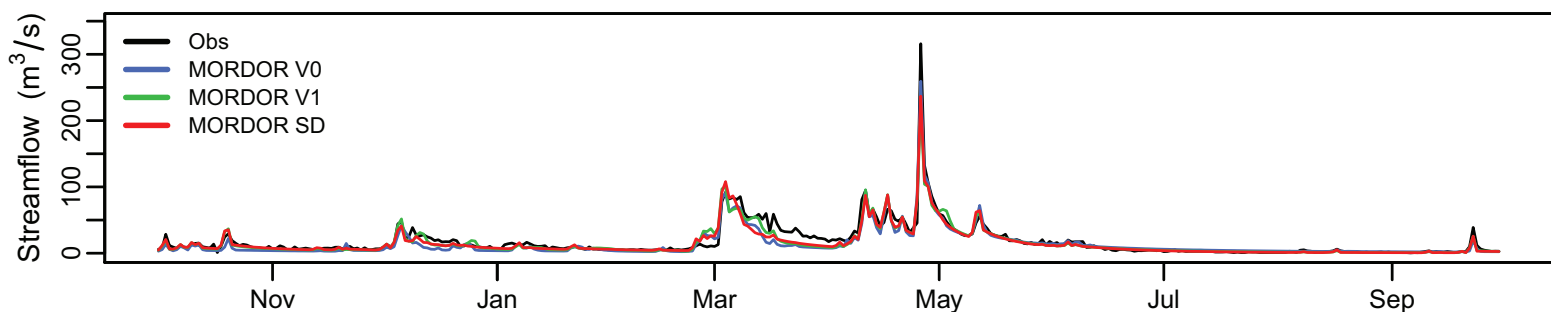

Year 1990

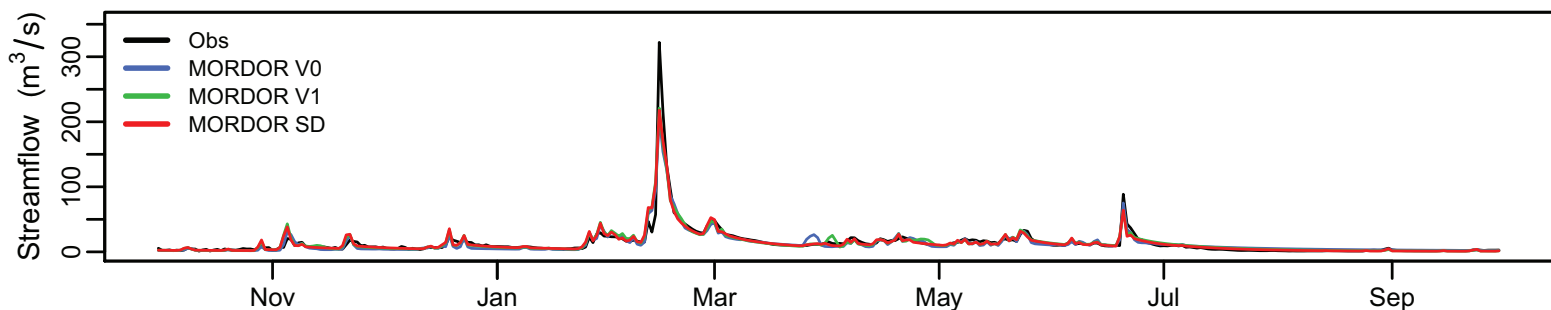

Year 1991

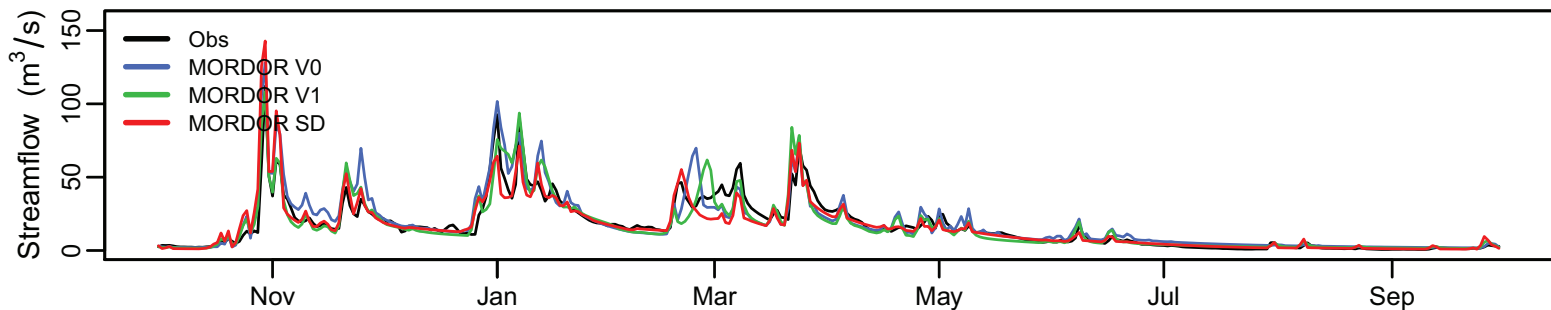

# Truyere@Grandval

Year 1992

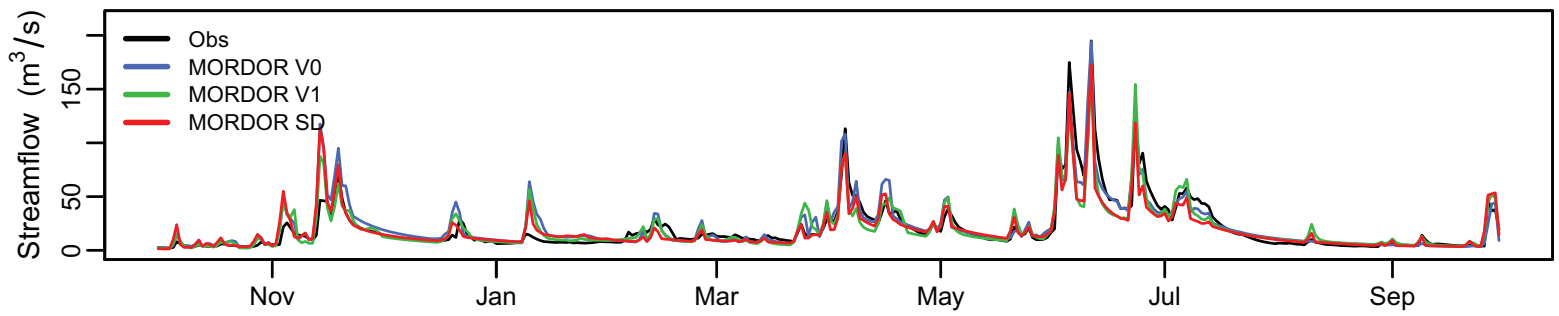

Year 1993

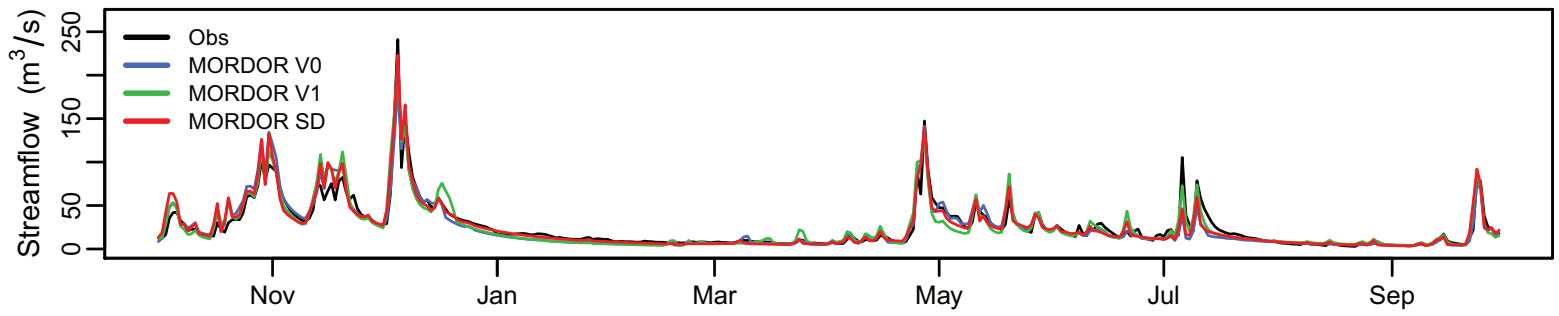

Year 1994

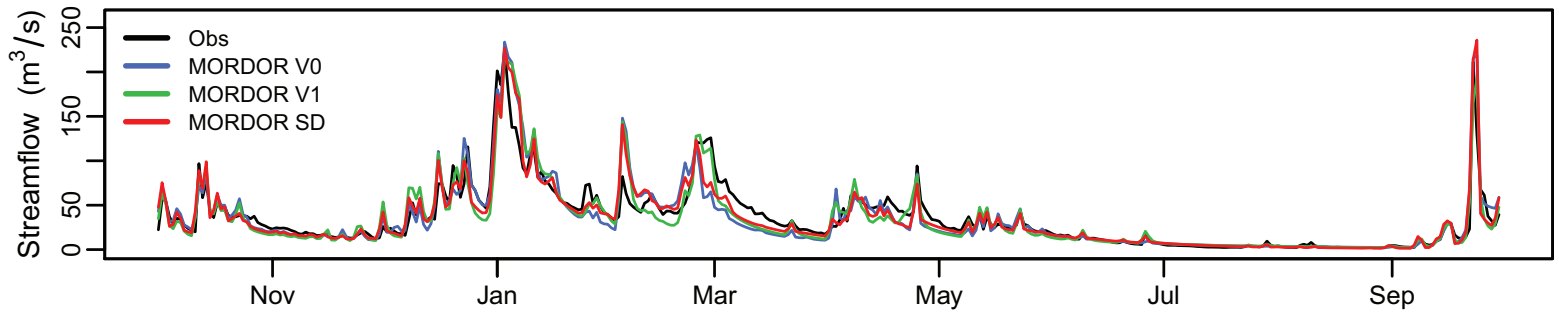

Year 1995

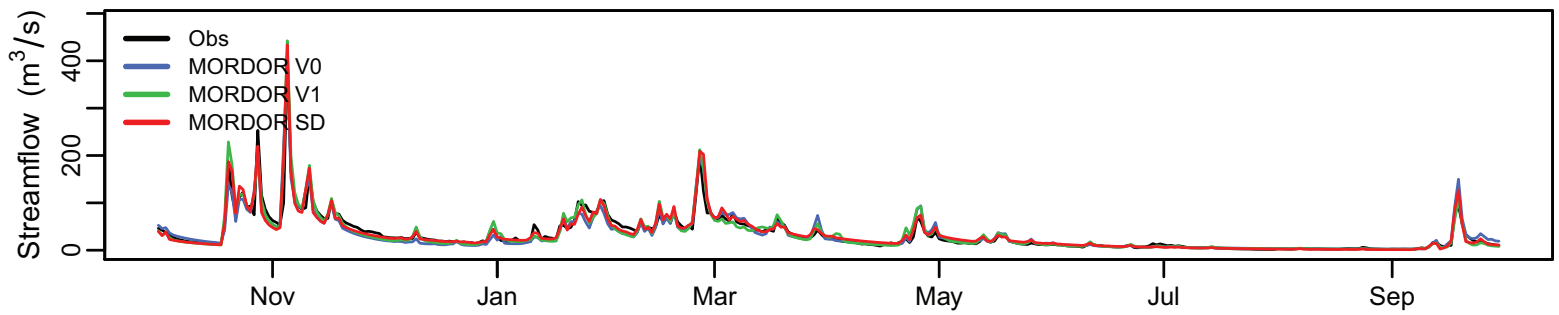

Year 1996

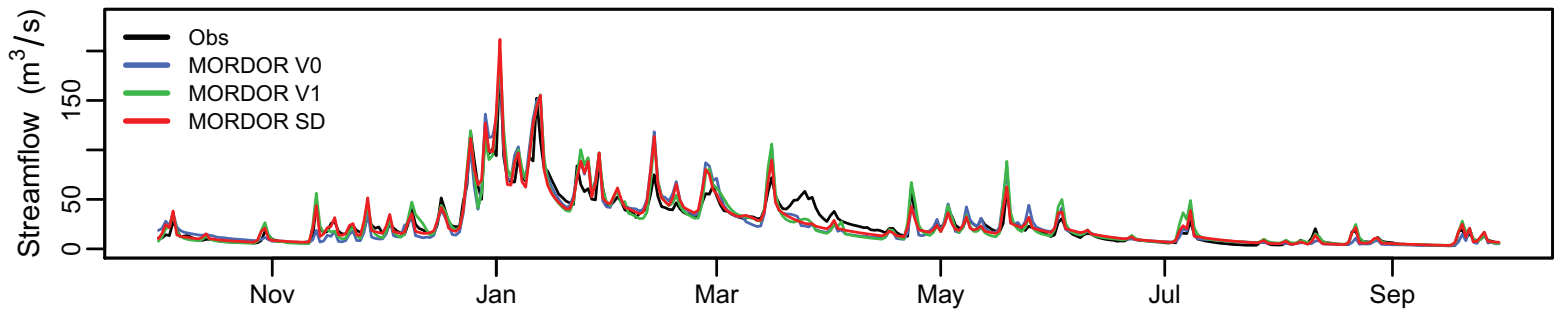

Year 1997

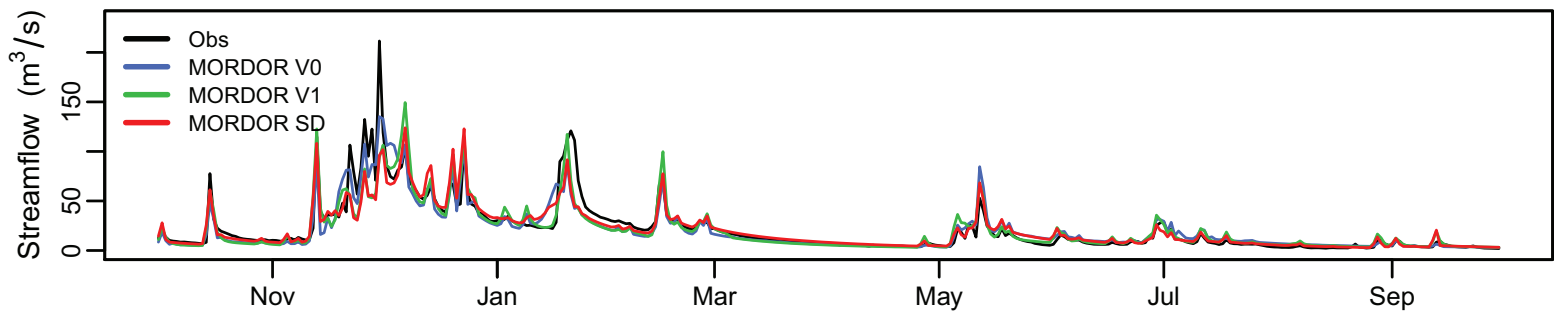

# Truyere@Grandval

Year 1998

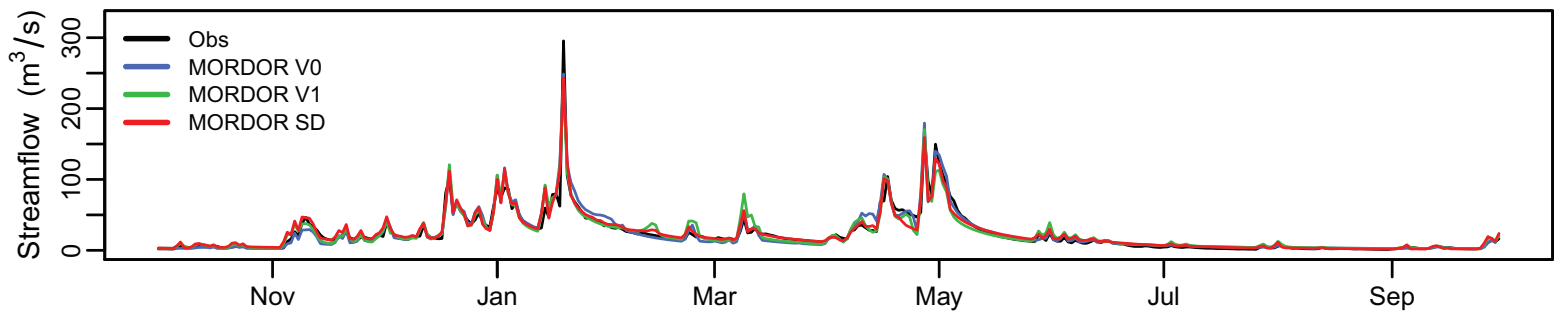

Year 1999

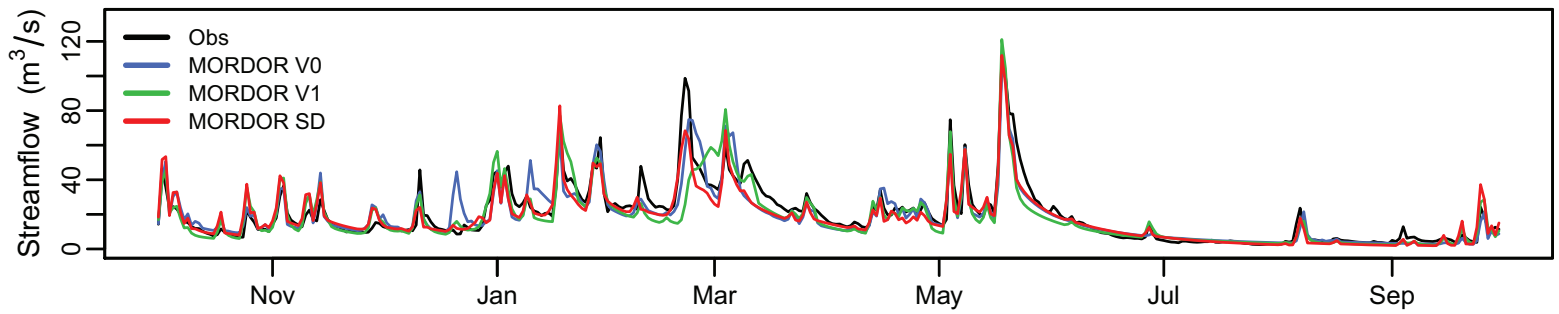

Year 2000

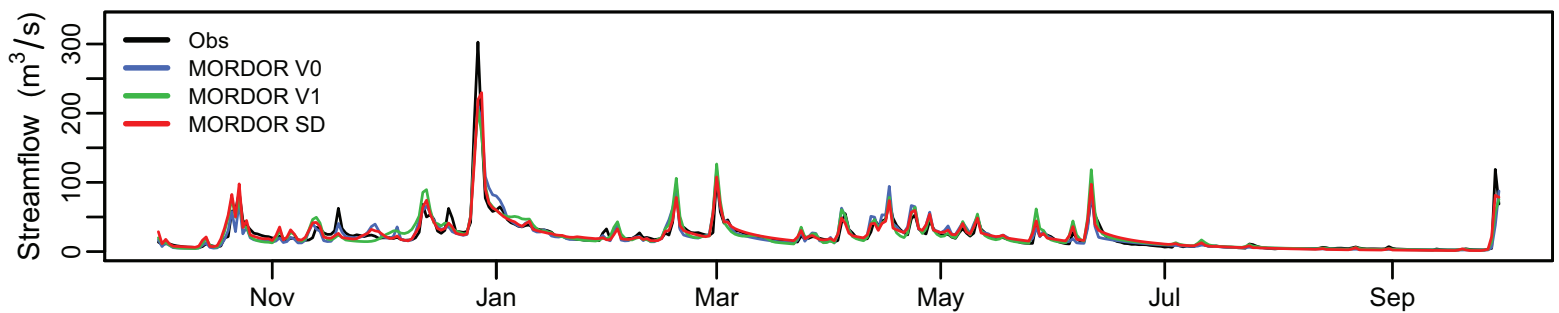

Year 2001

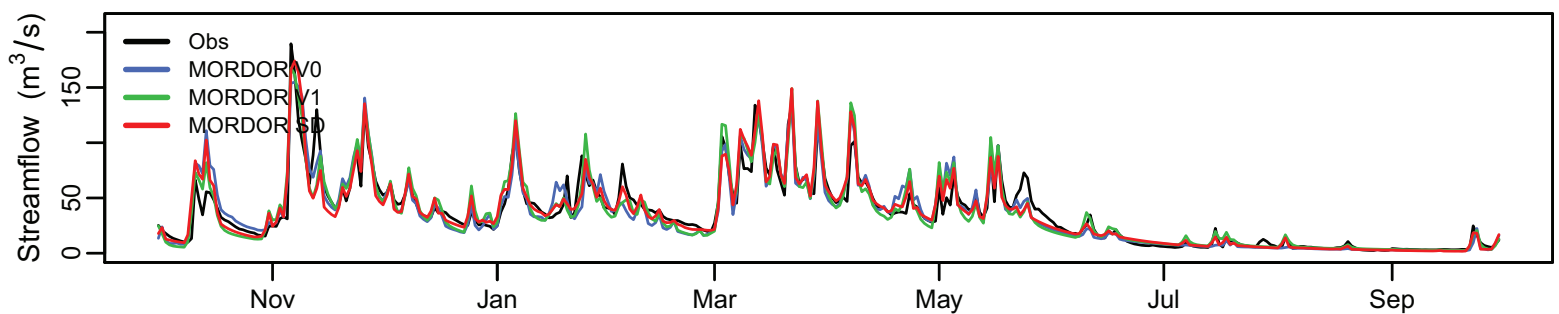

Year 2002

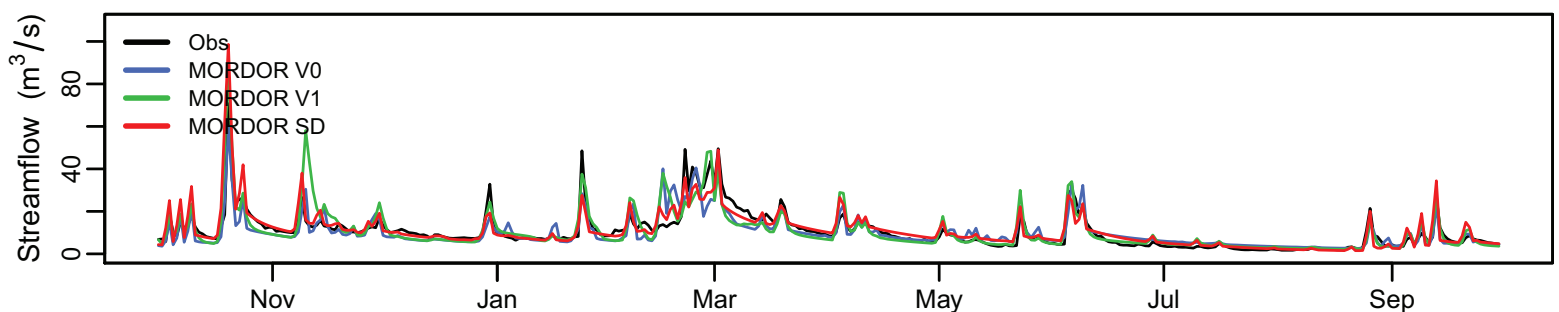

Year 2003

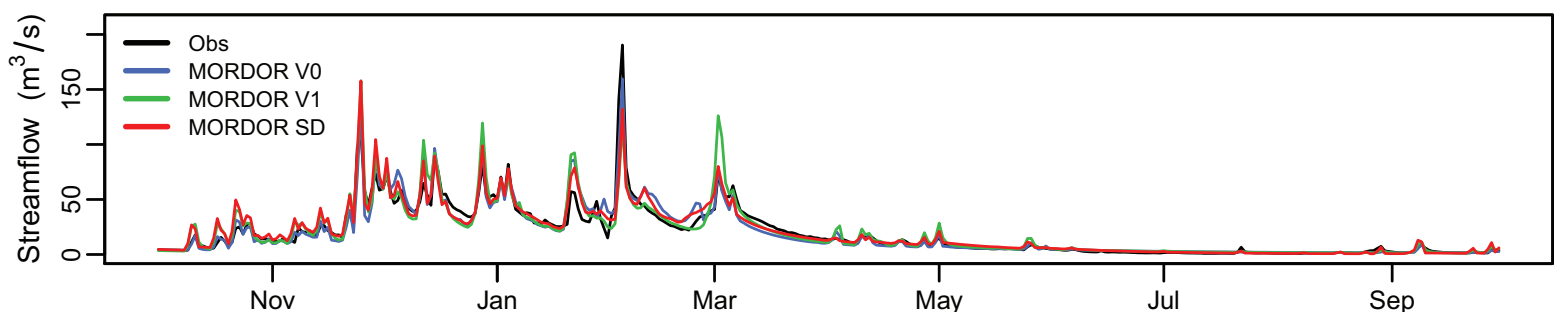

# Truyere@Grandval

Year 2004

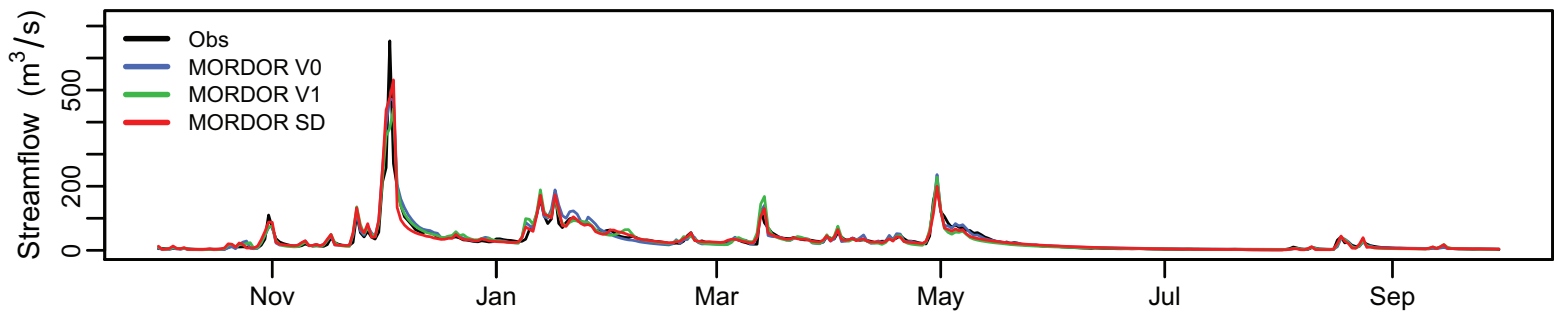

Year 2005

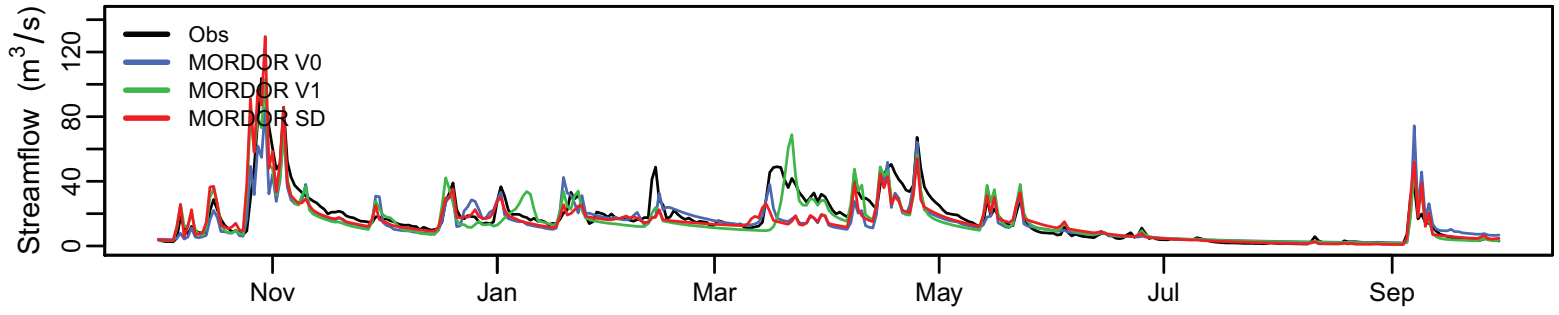

Year 2006

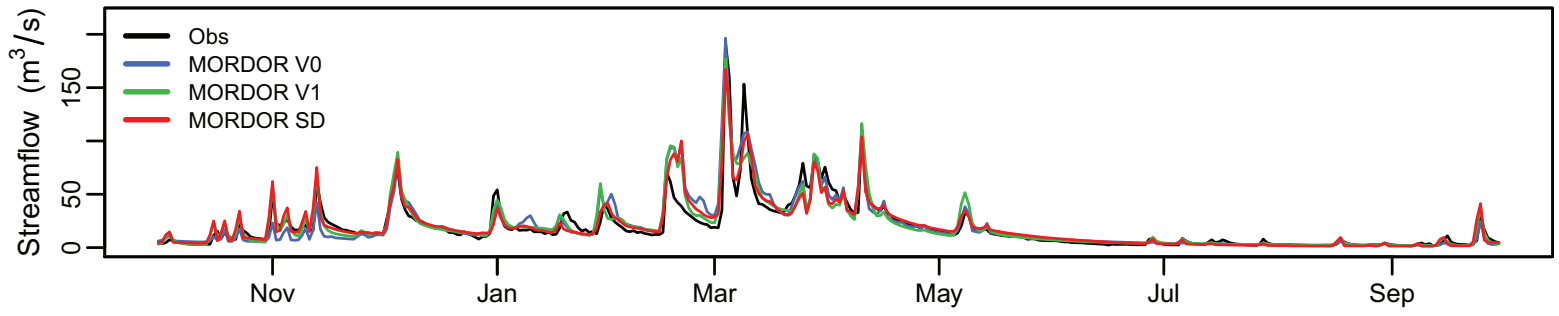

# Ubaye@RocheRousse

Year 1983

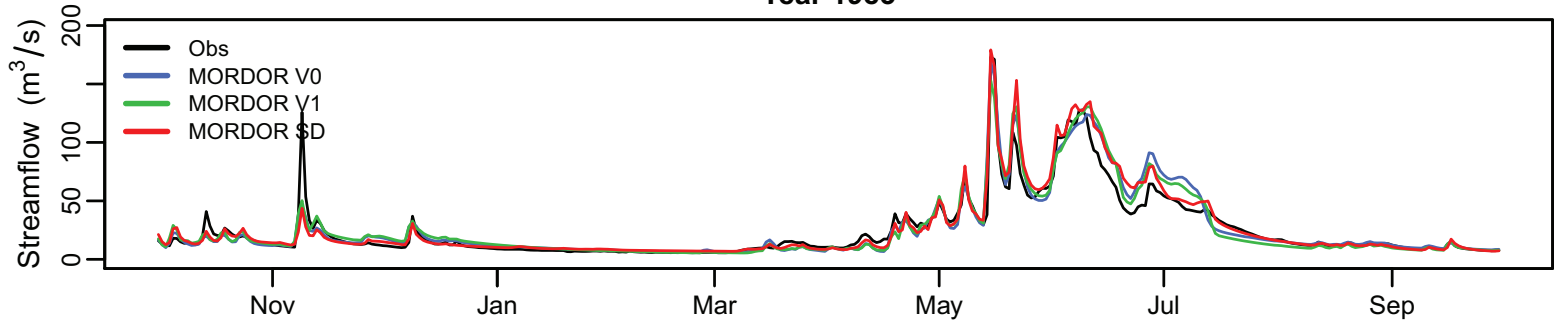

Year 1984

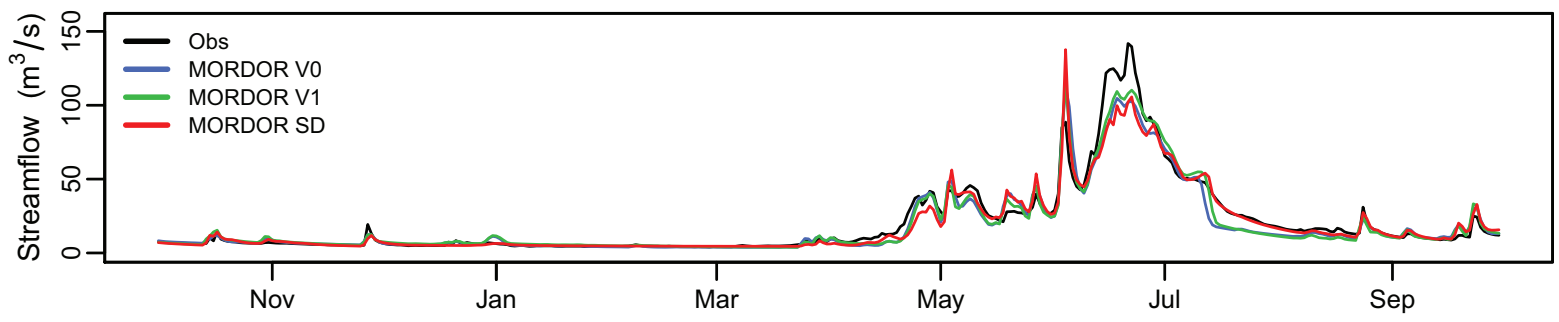

Year 1985

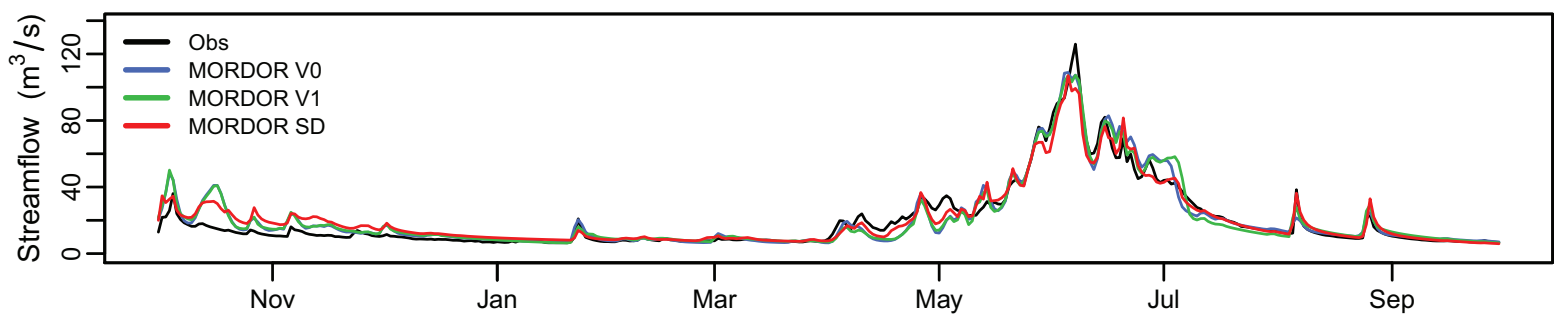

Year 1986

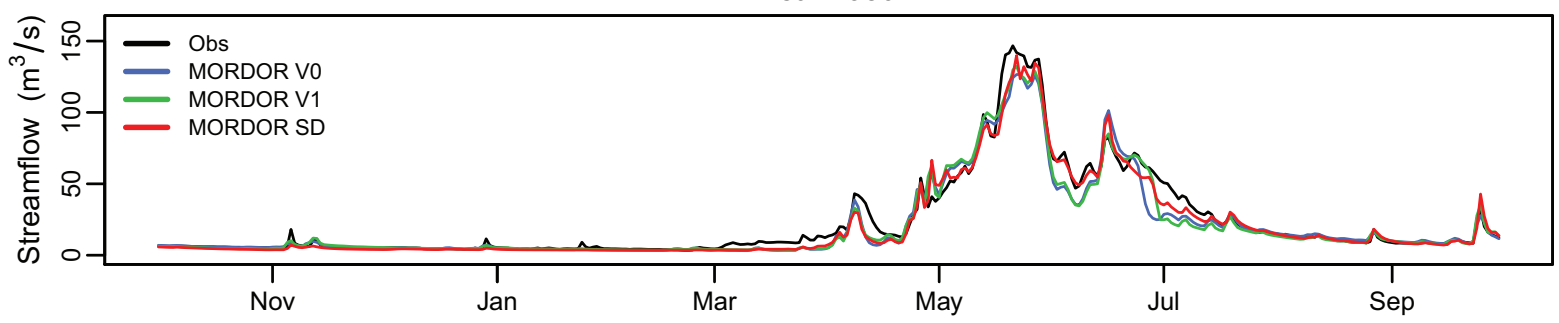

Year 1987

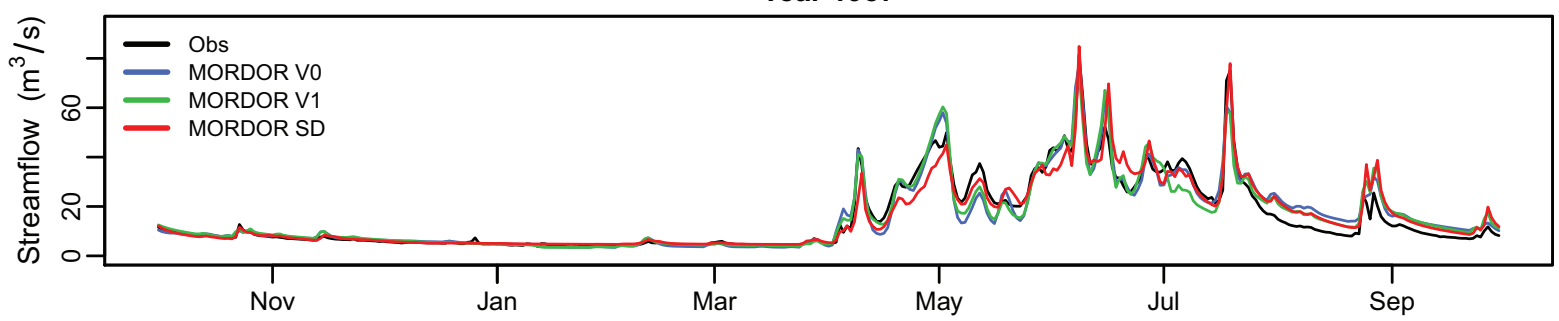

Year 1988

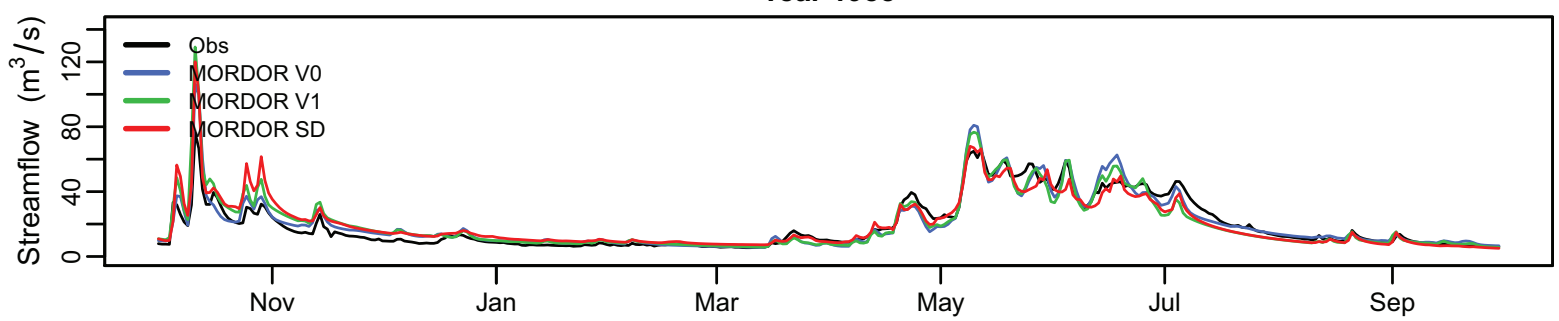

# Ubaye@RocheRousse

Year 1989

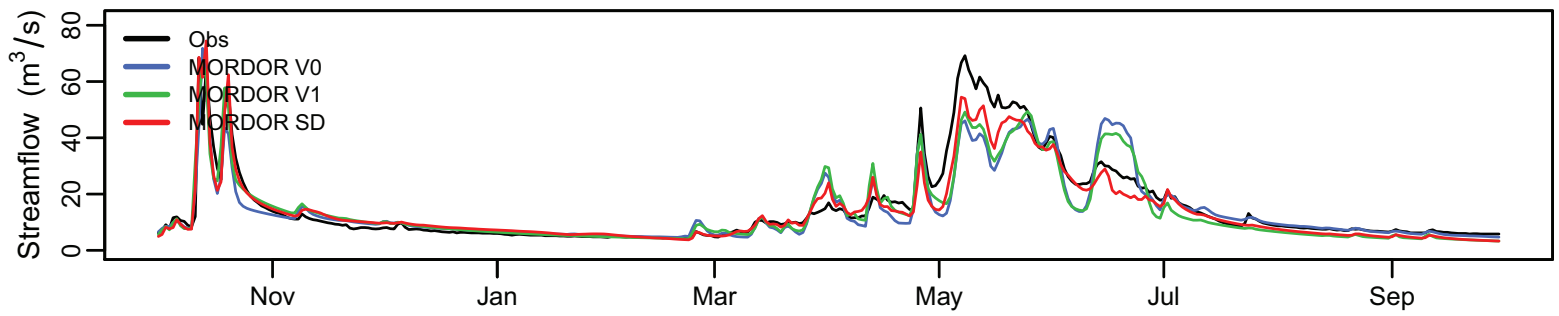

Year 1990

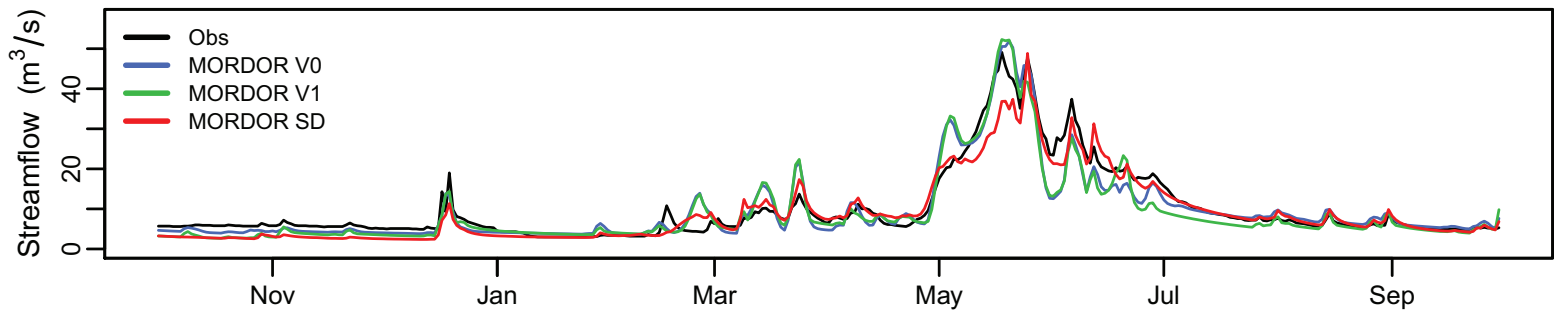

Year 1991

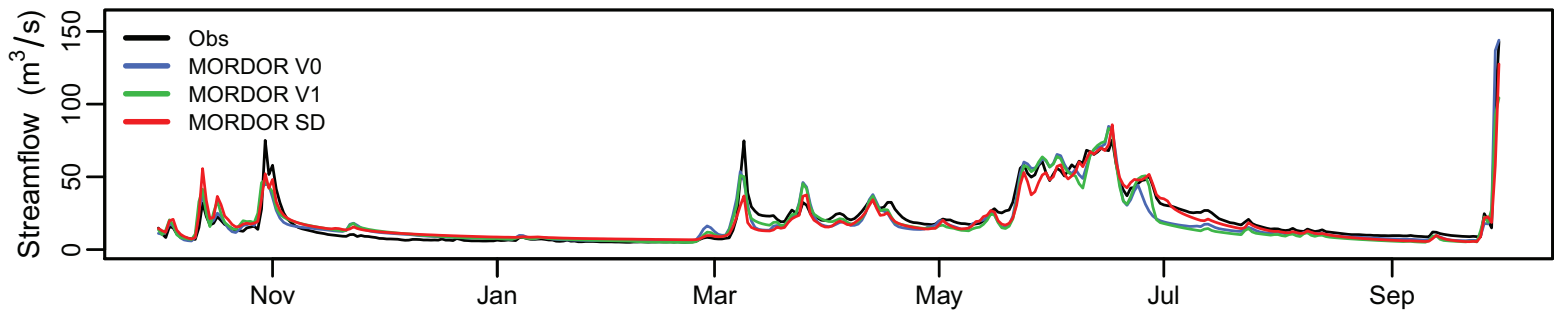

Year 1992

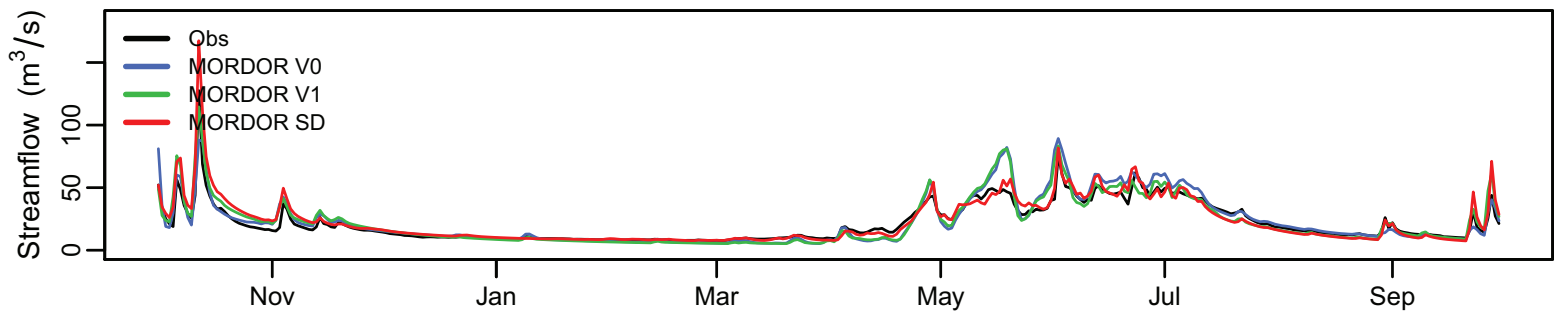

Year 1993

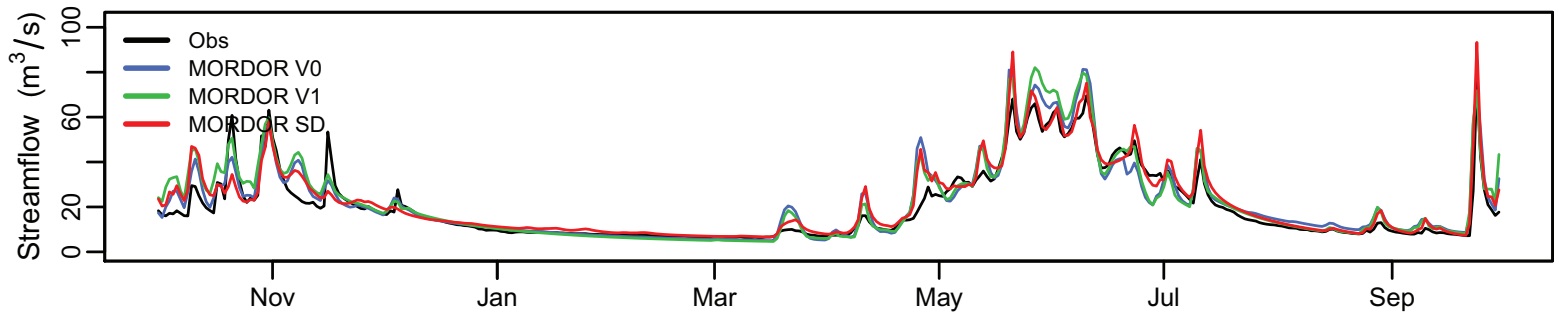

Year 1994

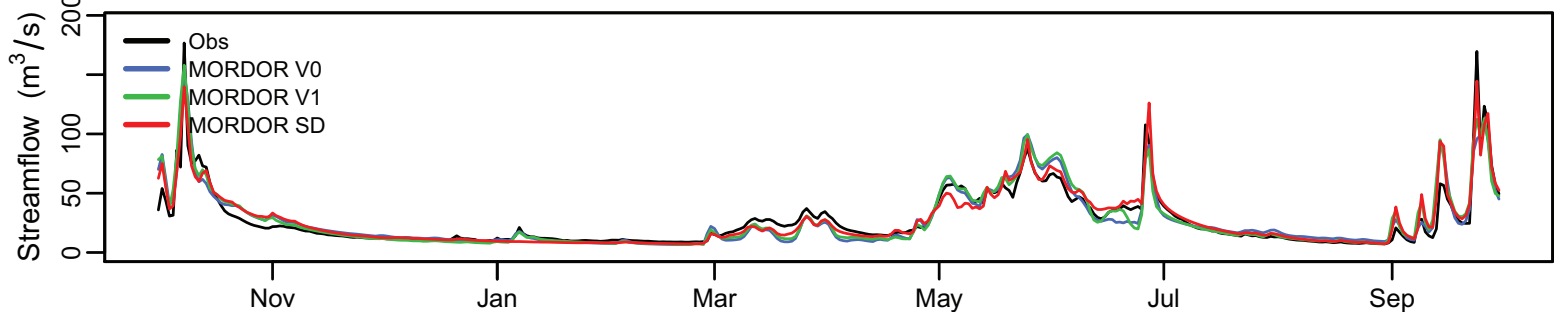

# Ubaye@RocheRousse

Year 1995

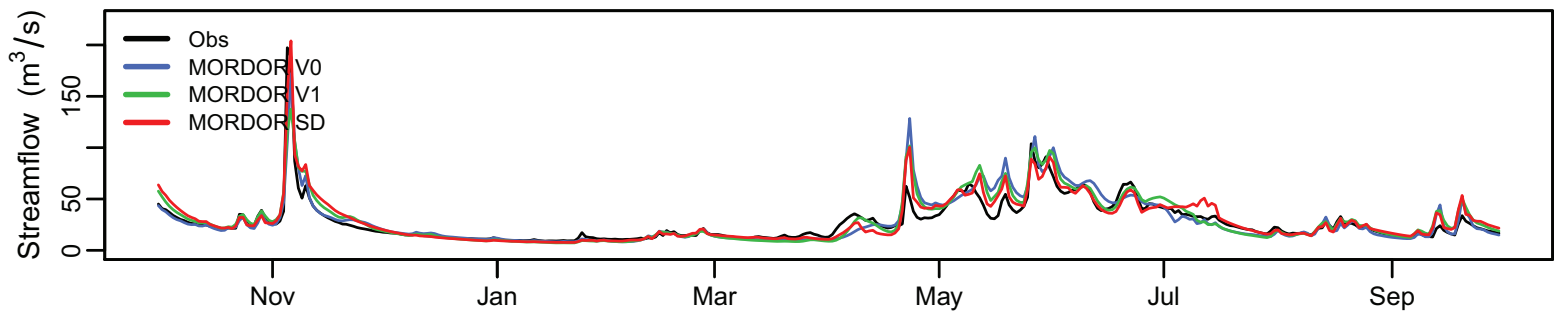

Year 1996

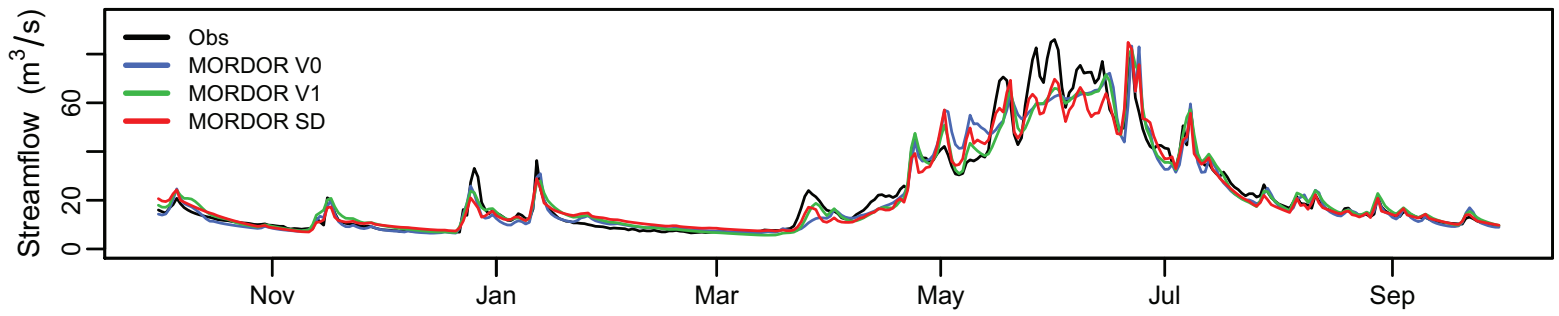

Year 1997

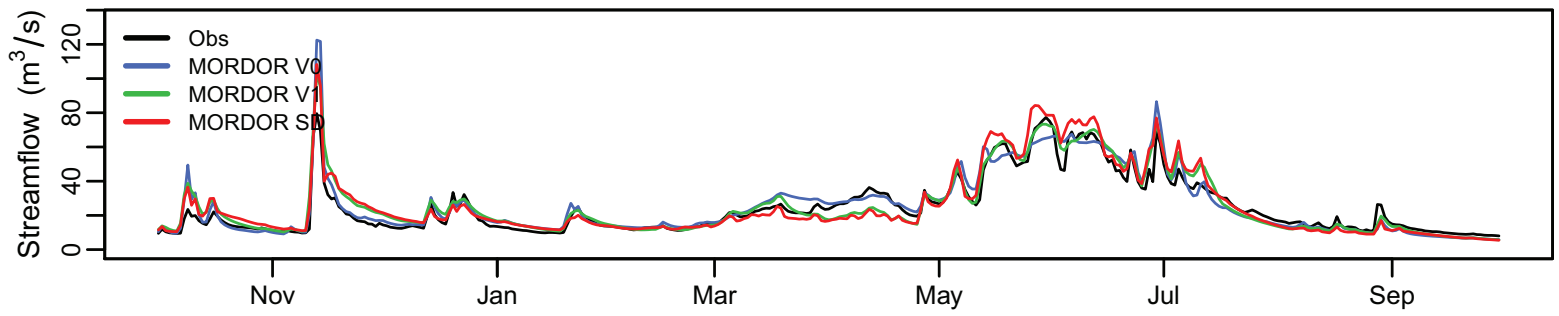

Year 1998

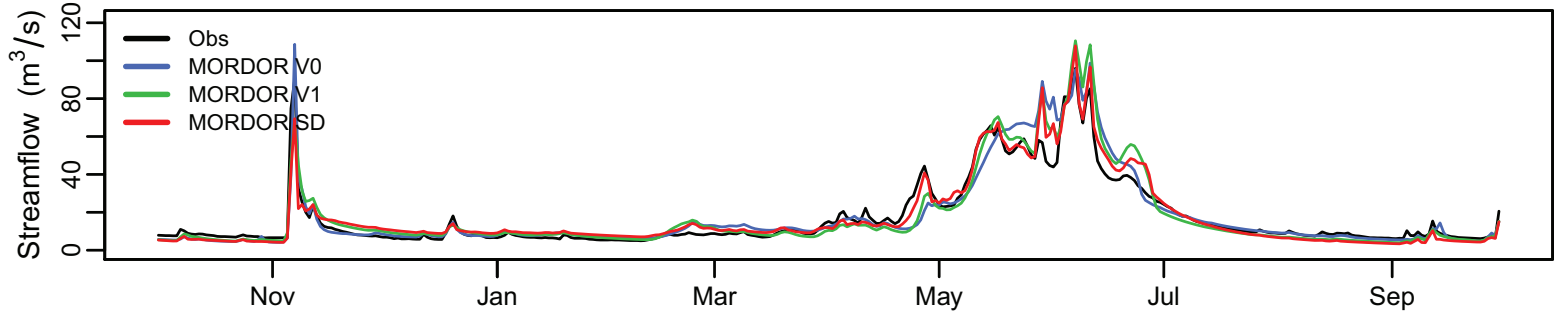

Year 1999

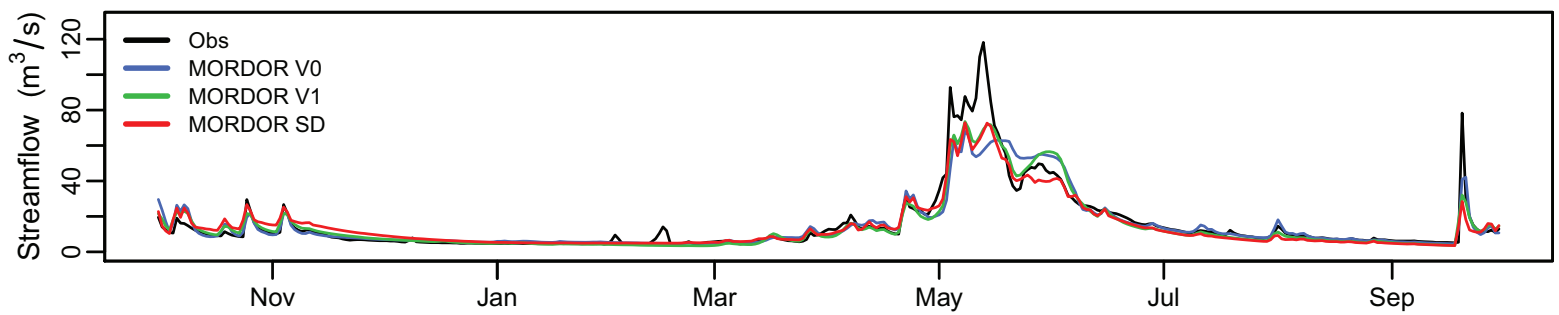

Year 2000

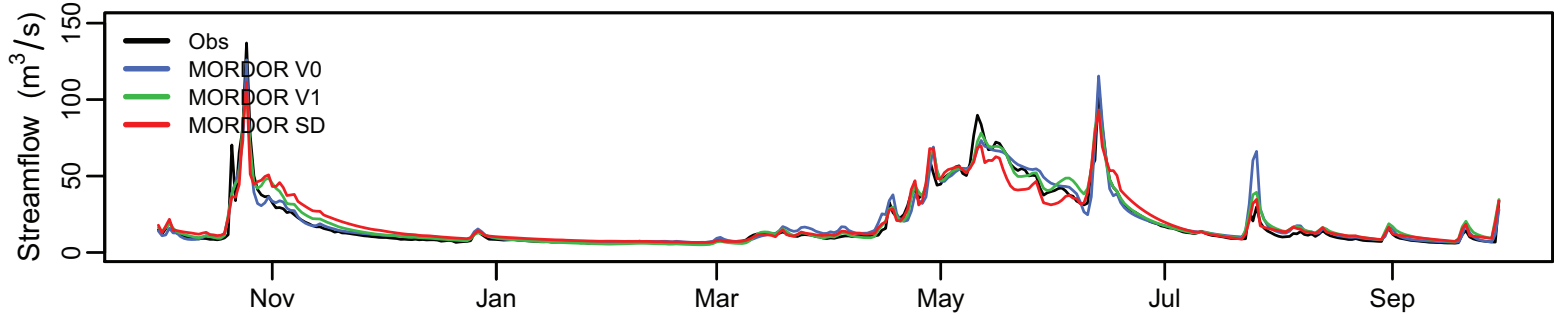



# Ubaye@RocheRousse

Year 2001

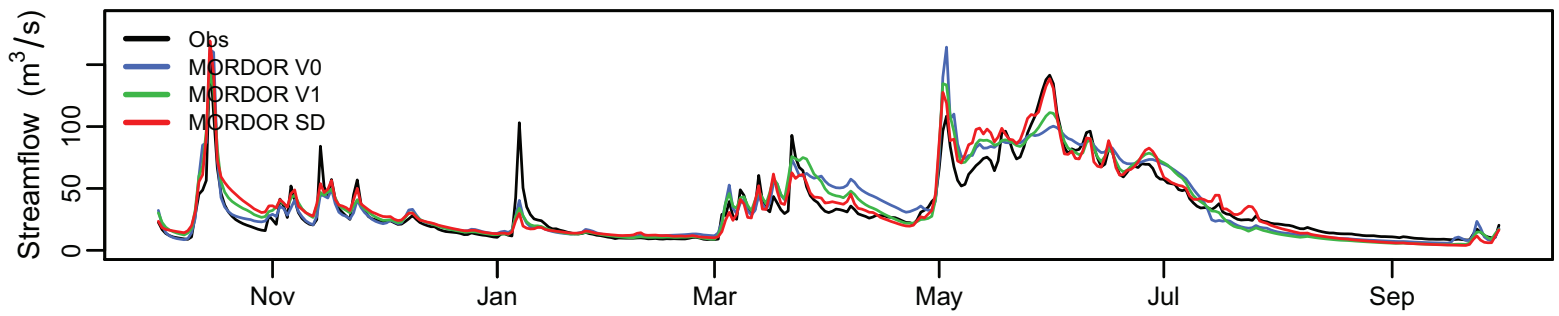

Year 2002

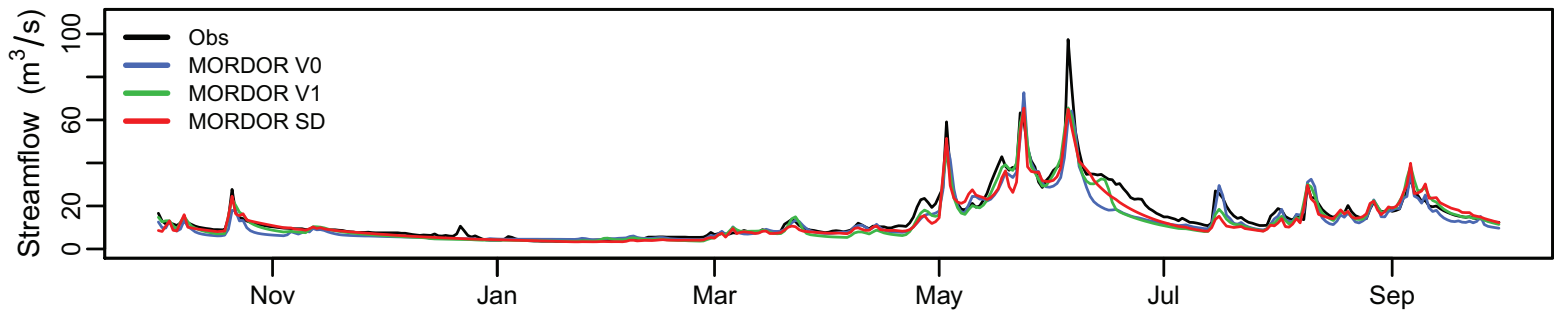

Year 2003

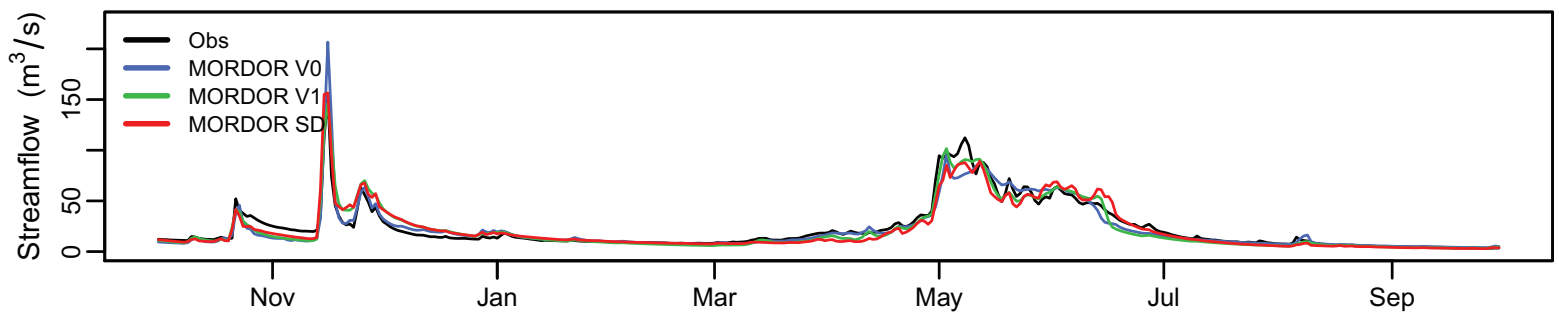

Year 2004

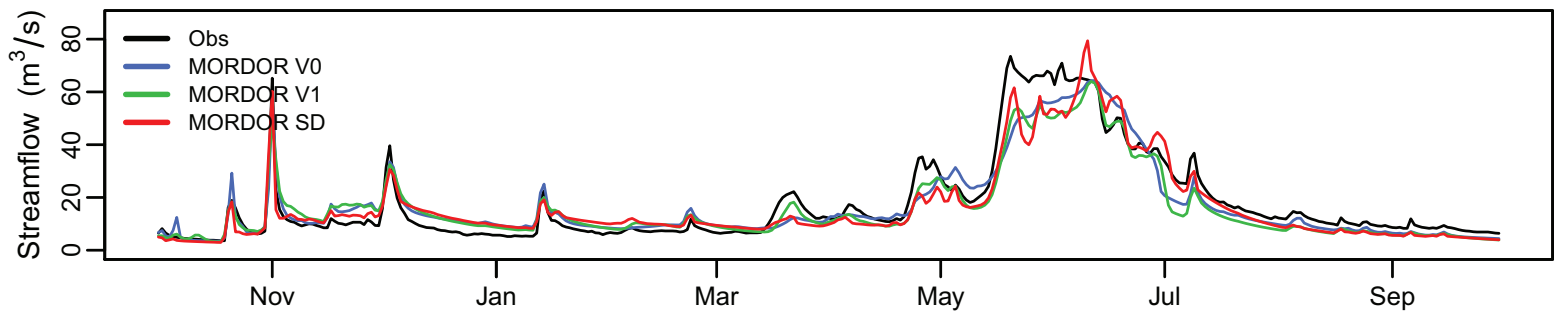

Year 2005

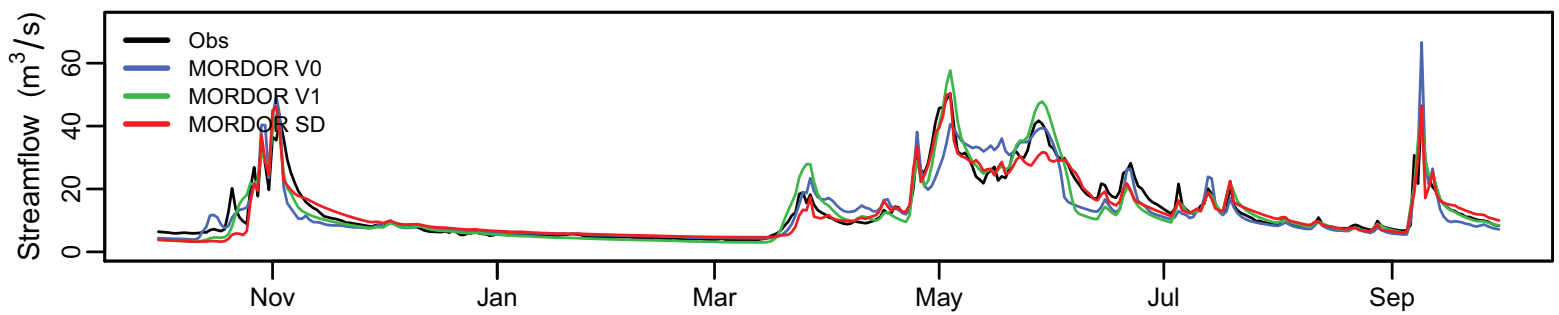

# Vence@Francheville

Year 1975

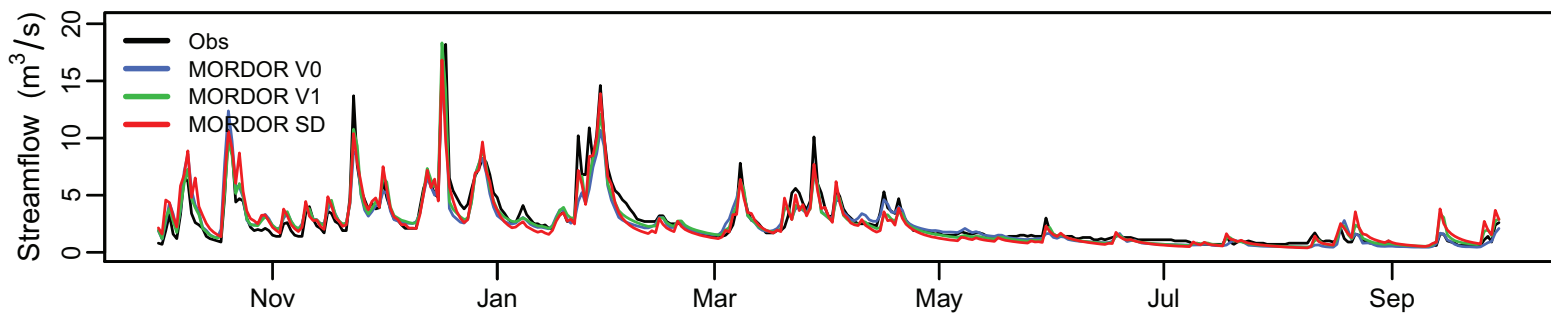

Year 1976

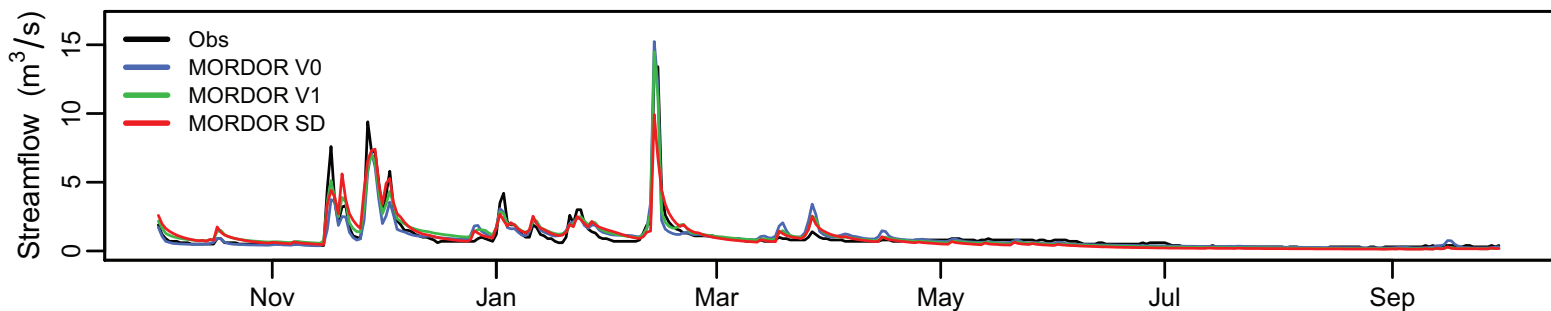

Year 1977

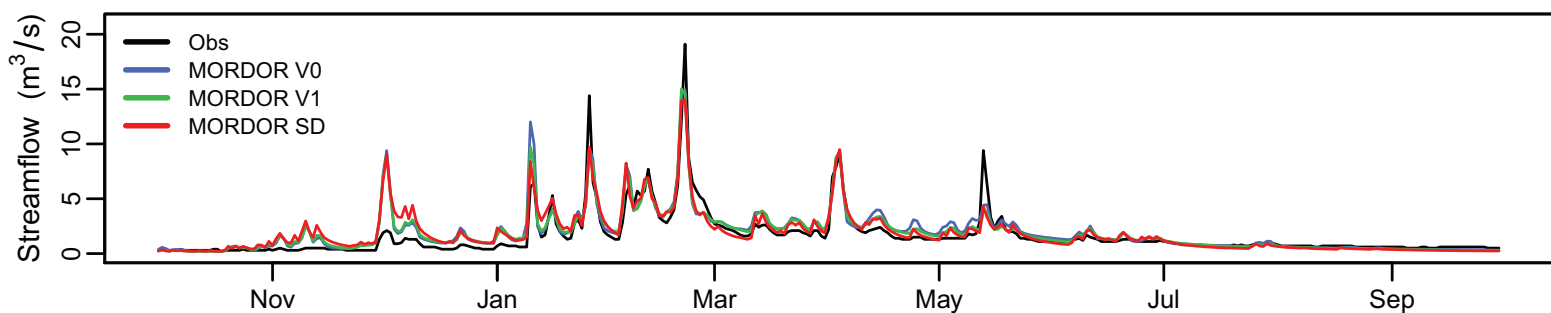

Year 1978

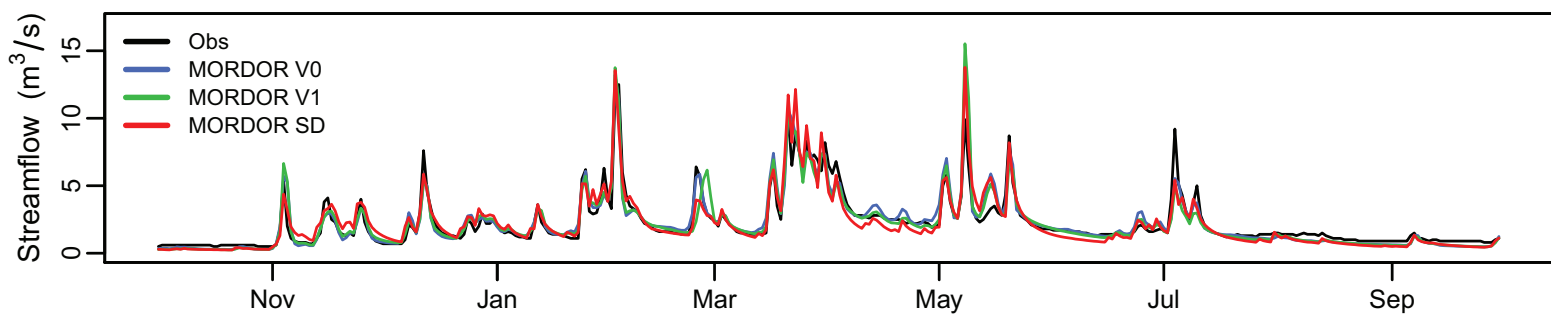

Year 1979

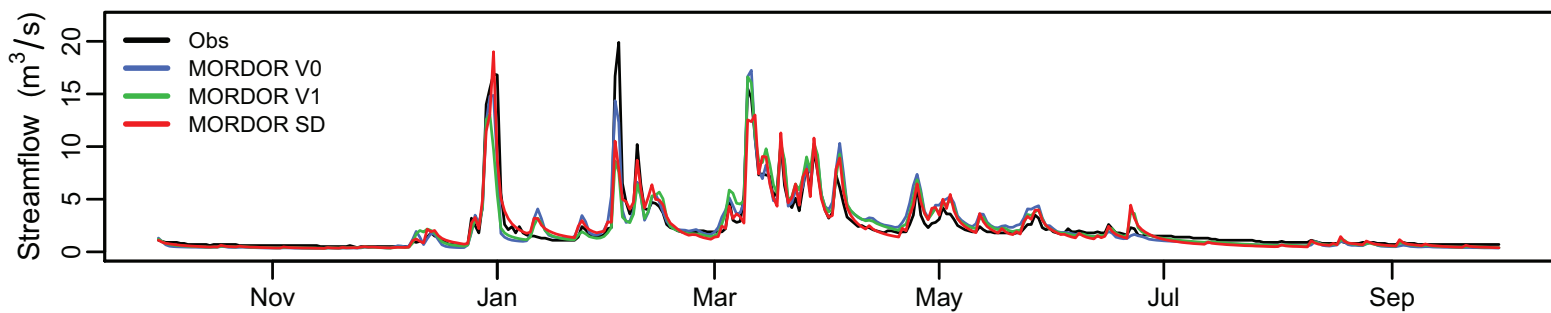

Year 1980

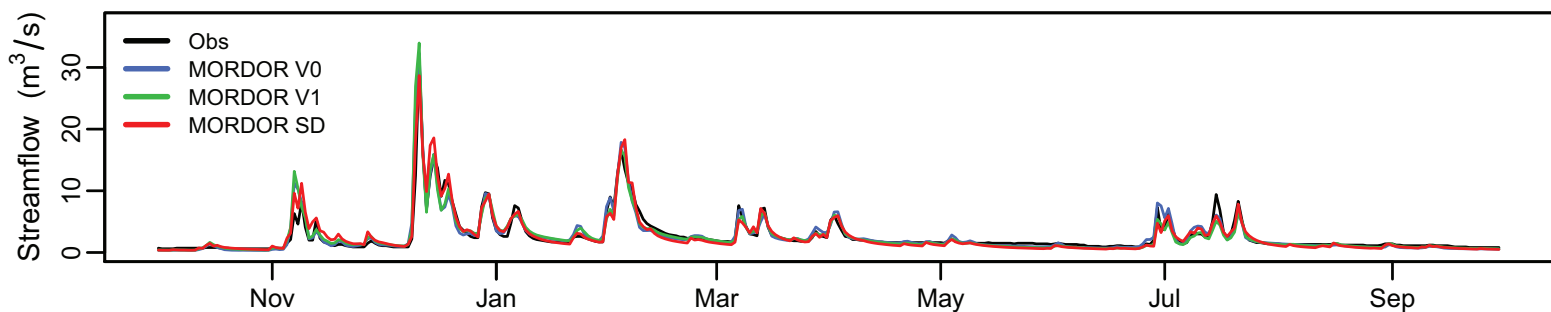

# Vence@Francheville

Year 1981

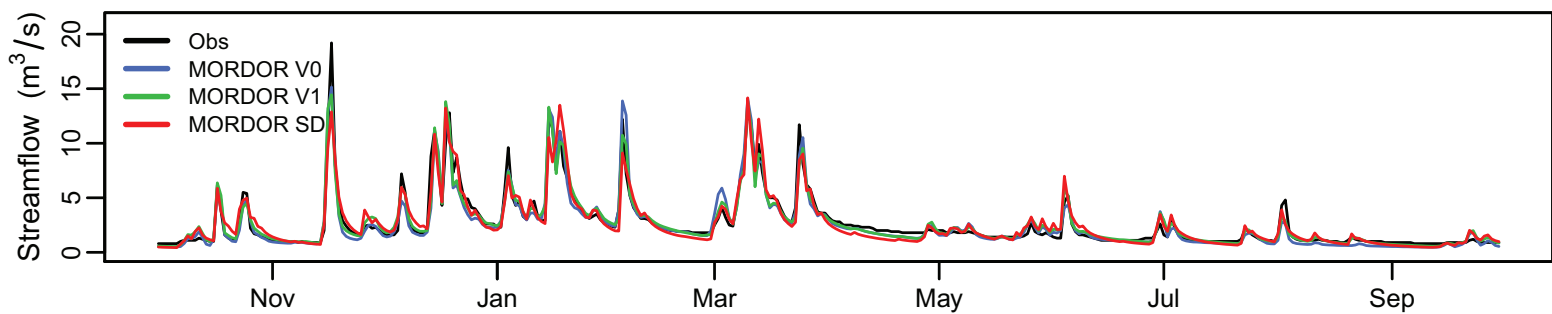

Year 1982

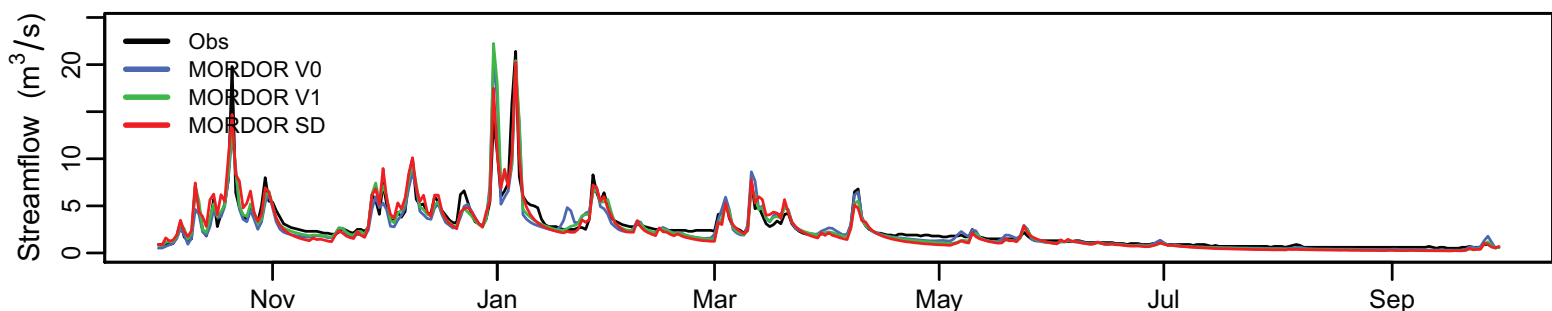

Year 1983

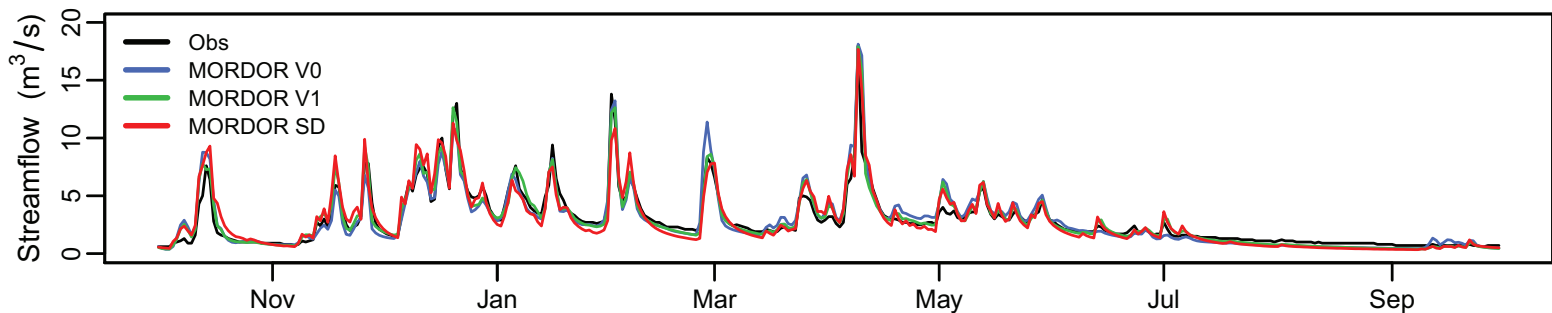

Year 1984

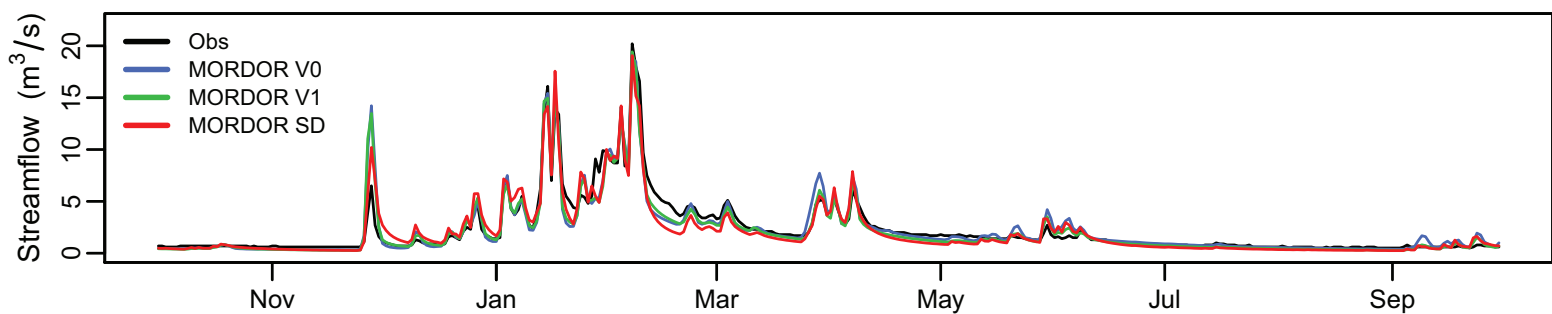

Year 1985

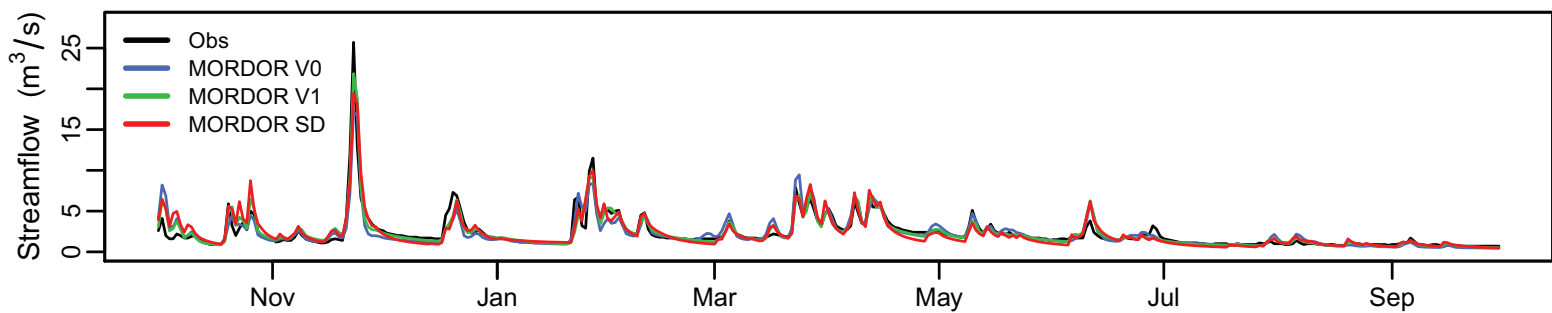

Year 1986

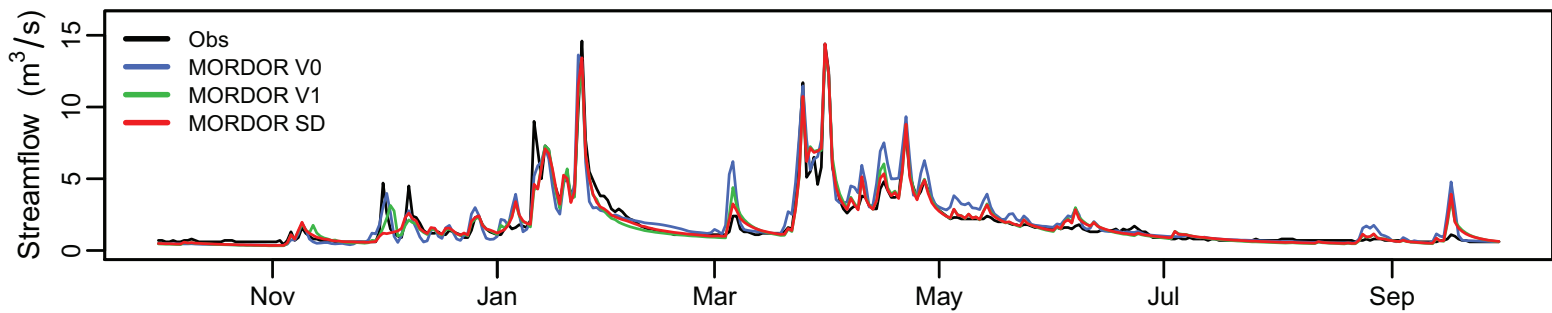

# Vence@Francheville

Year 1987

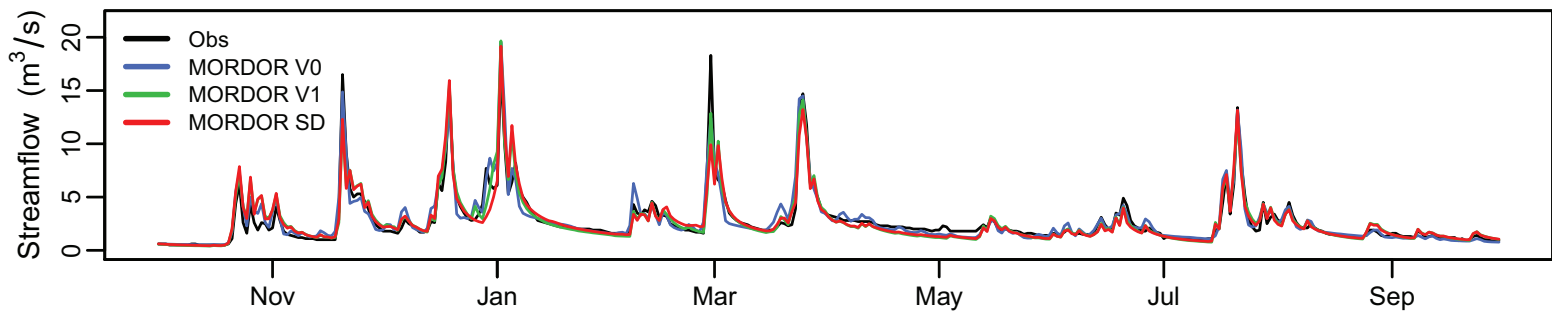

Year 1988

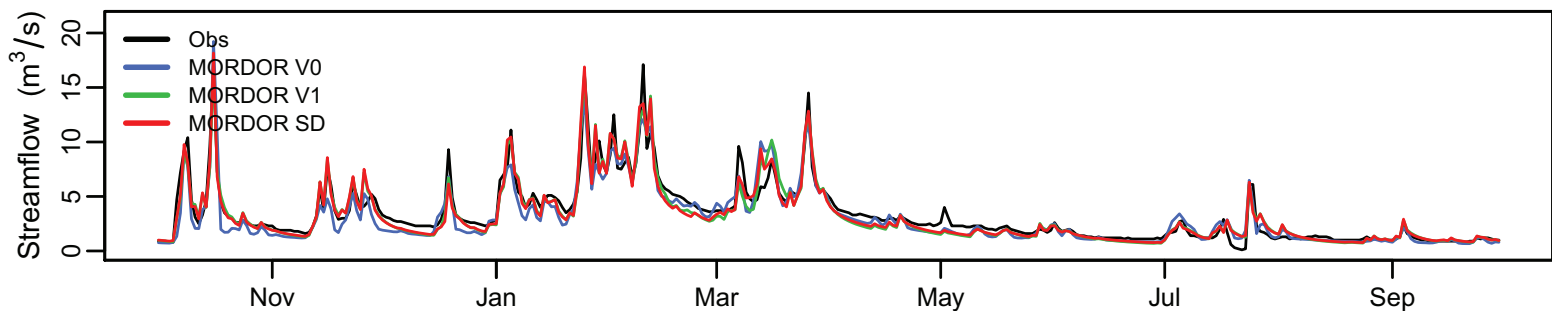

Year 1989

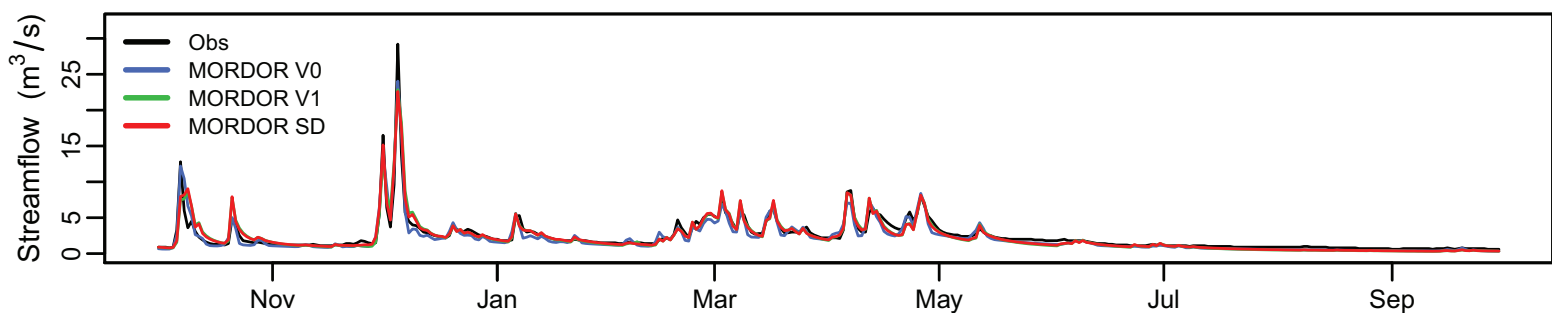

Year 1990

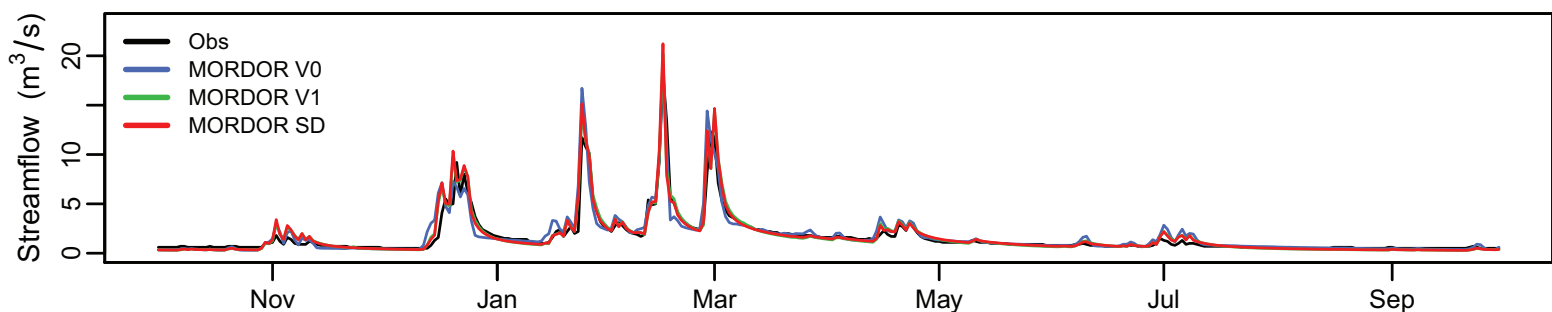

Year 1991

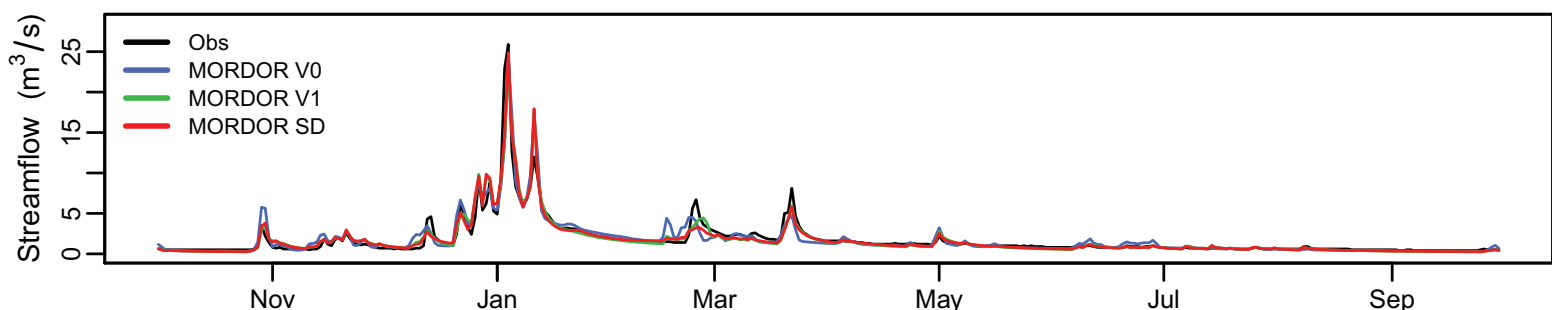

Year 1992

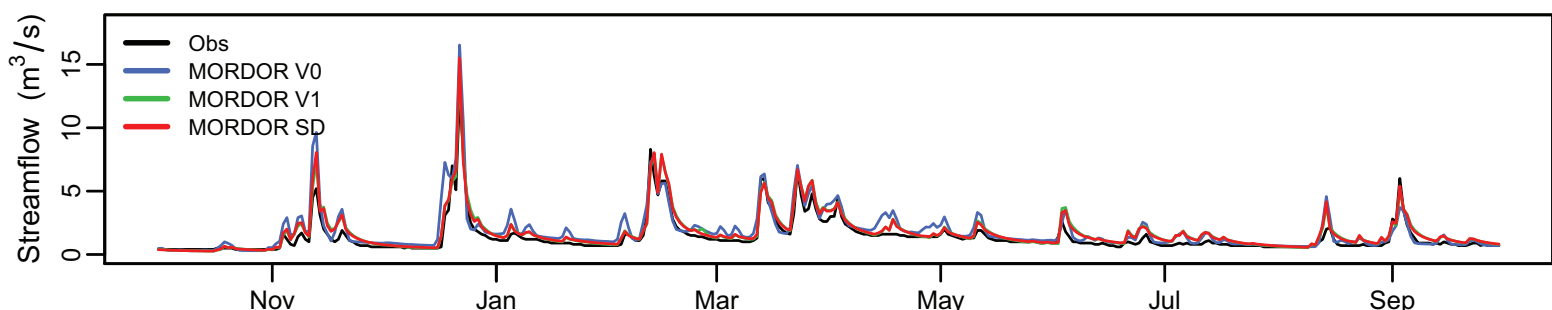

# Vence@Francheville

Year 1993

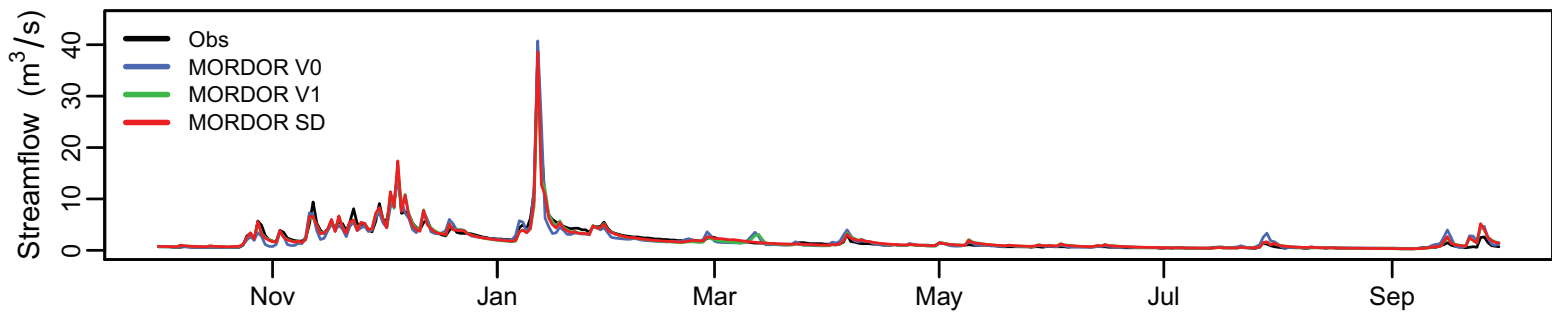

Year 1994

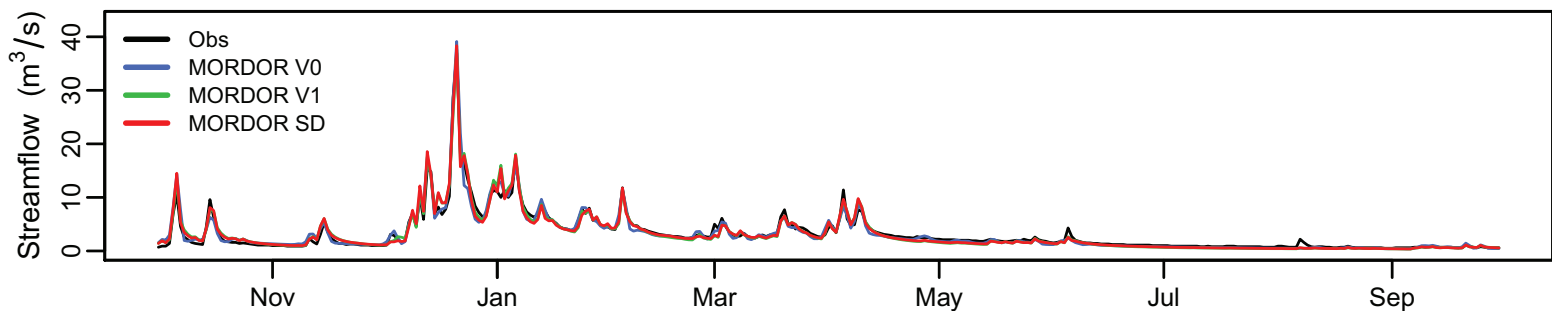

Year 1995

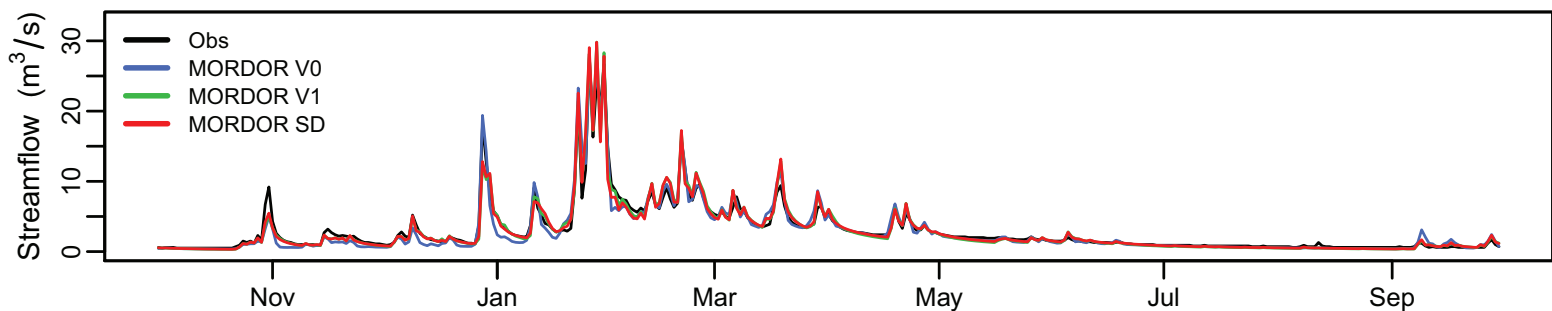

# Vienne@Bussy

Year 1984

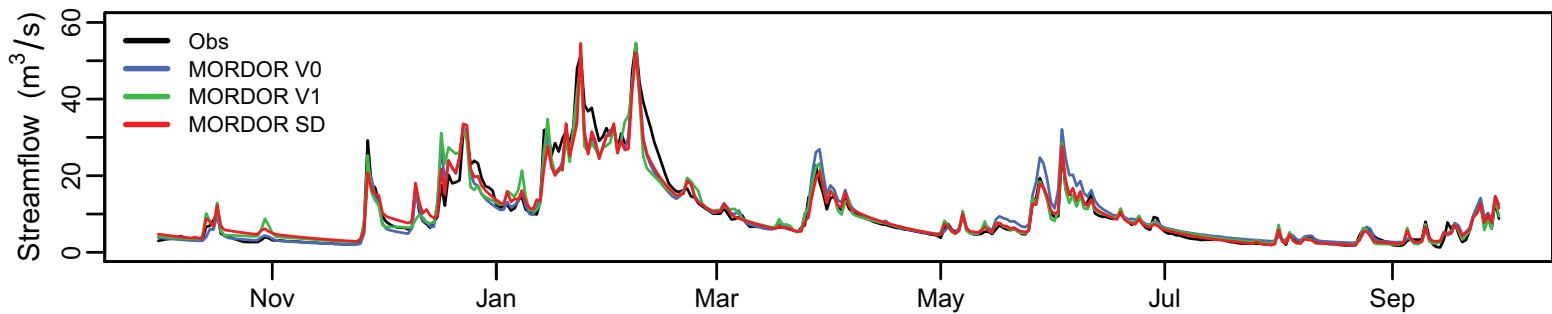

Year 1985

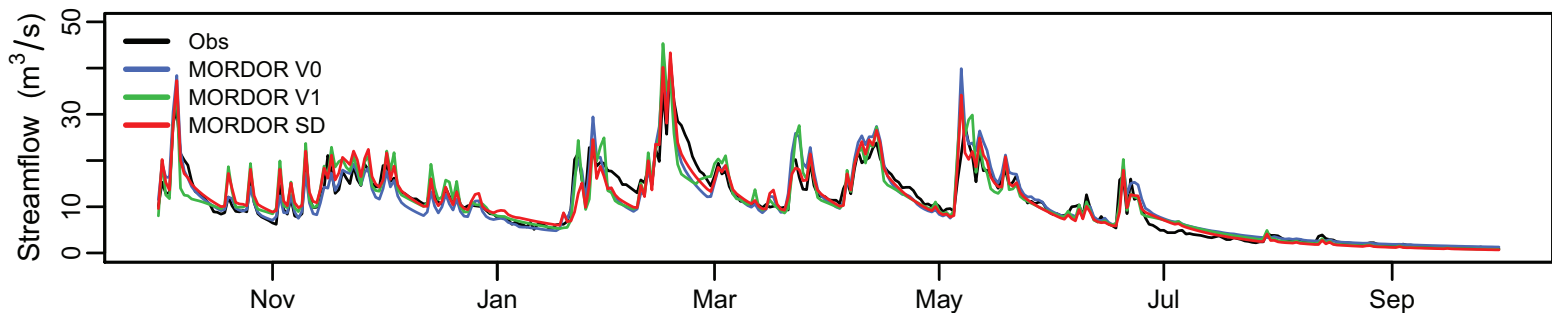

Year 1986

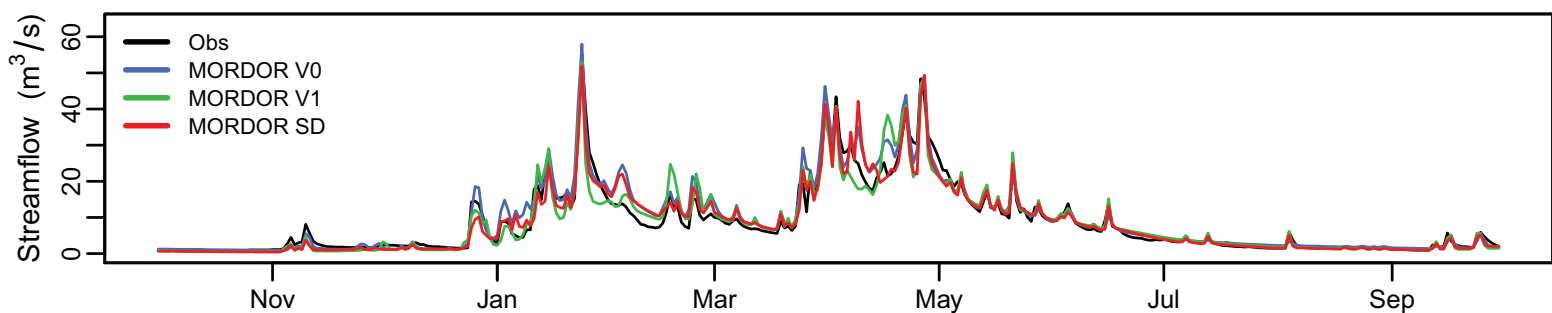

Year 1987

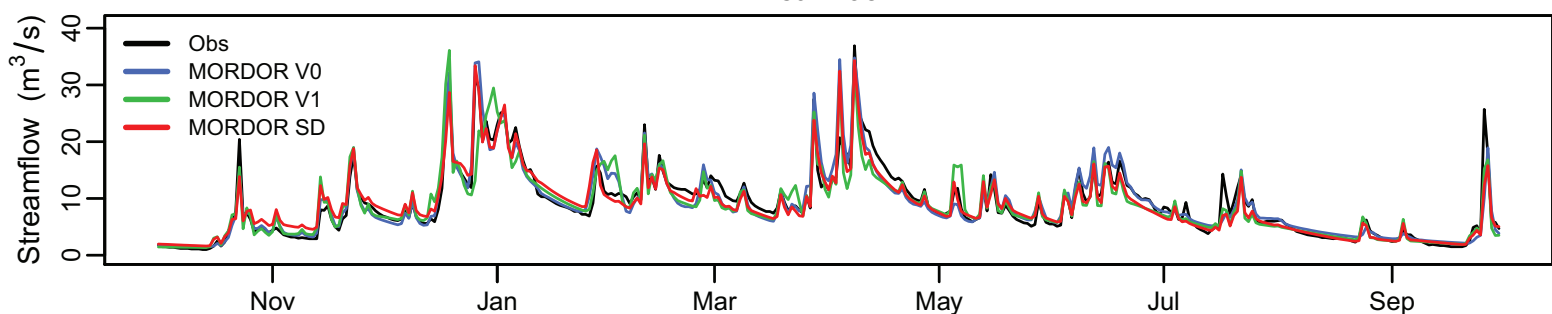

Year 1988

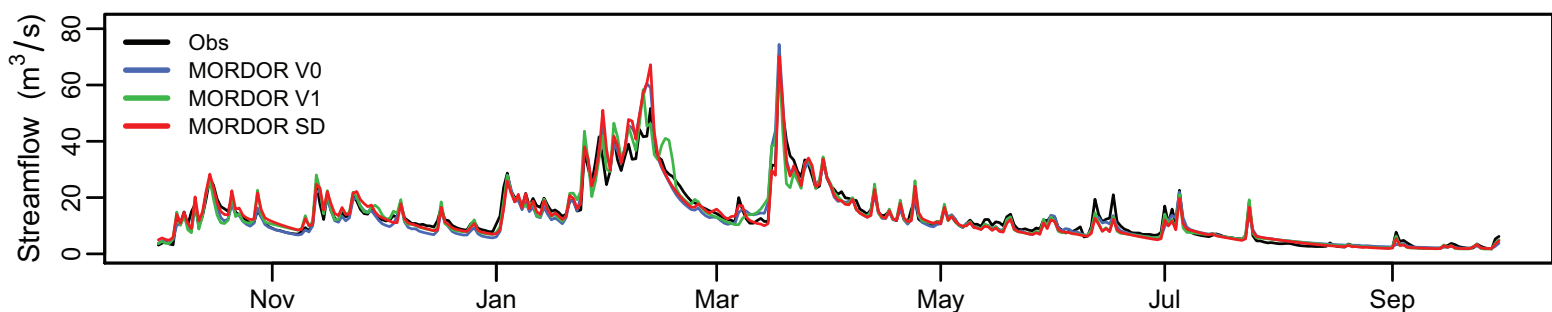

Year 1989

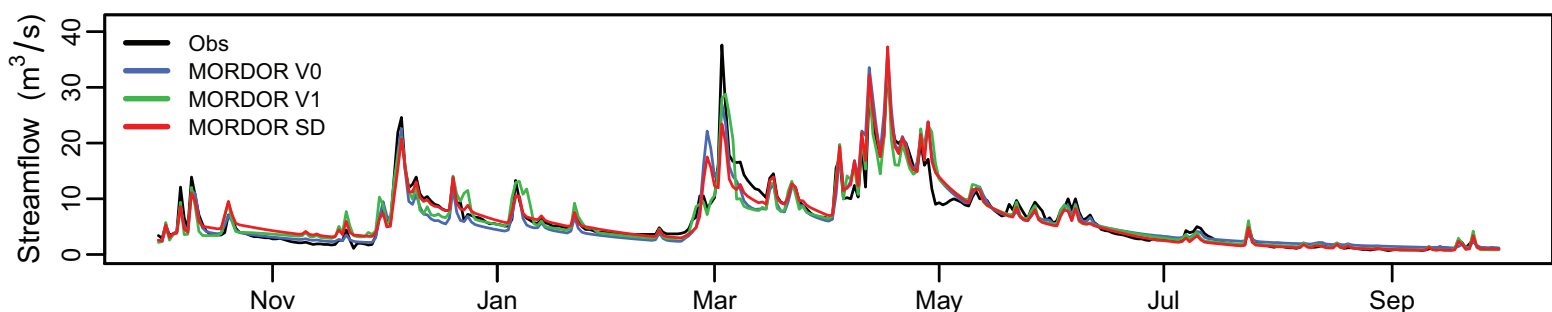

# Vienne@Bussy

Year 1990

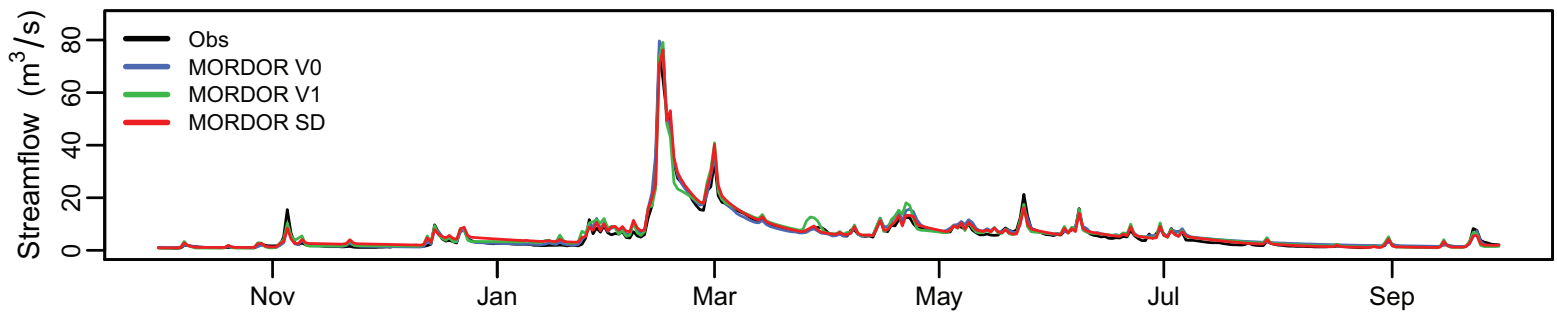

Year 1991

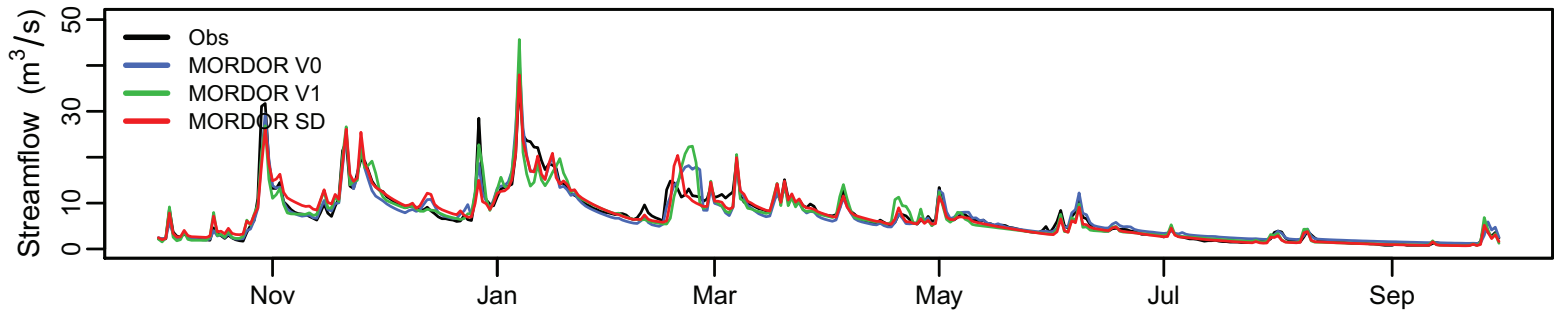

Year 1992

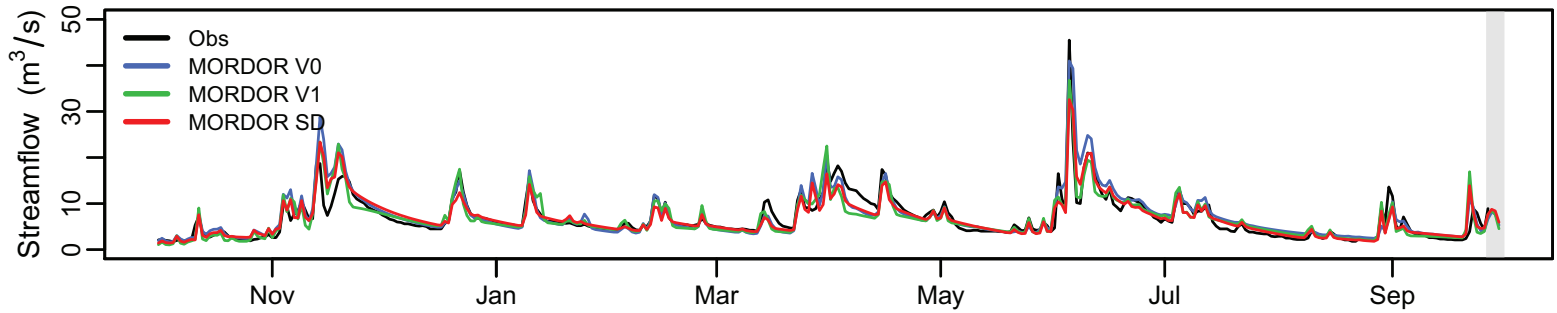

Year 1993

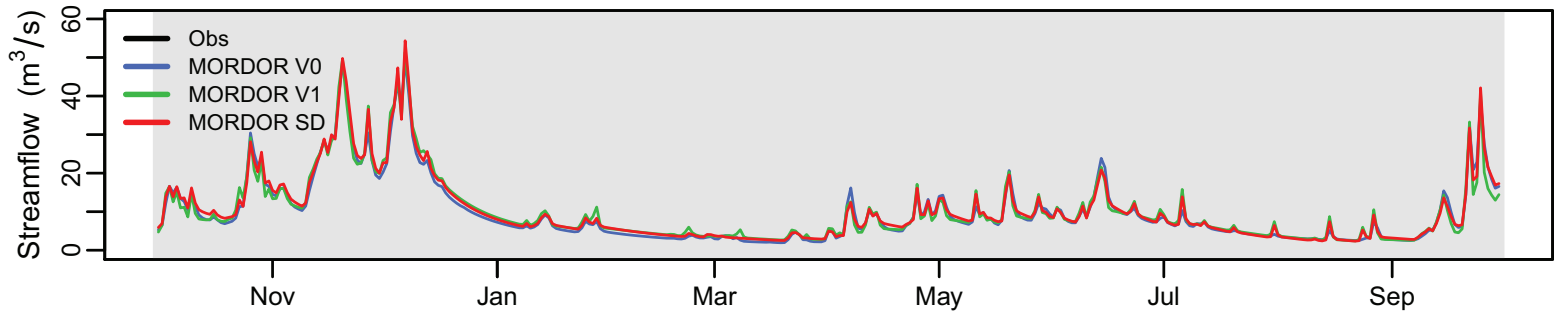

Year 1994

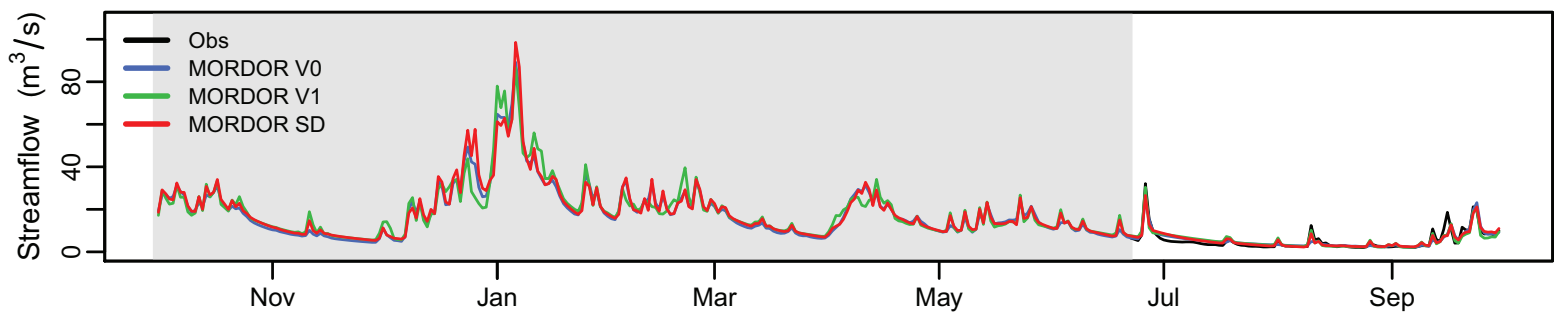

Year 1995

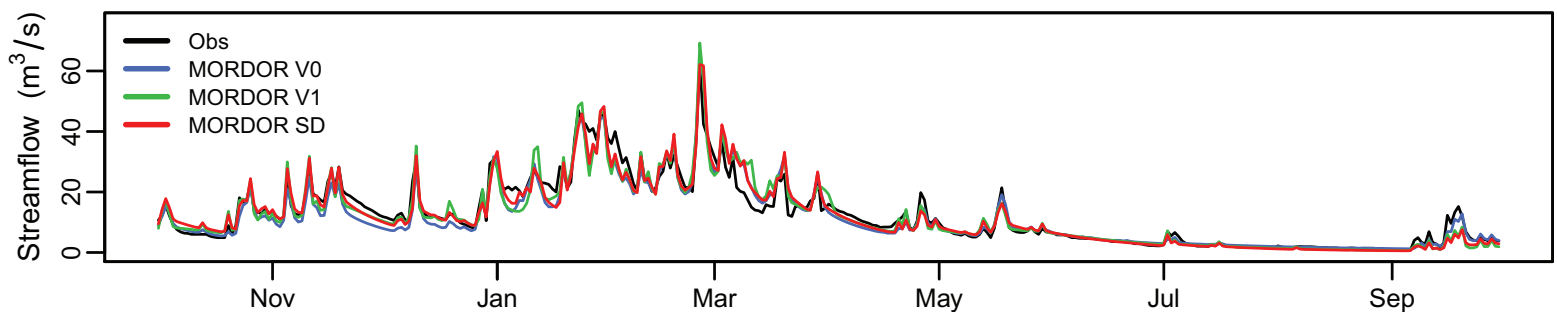

# Vienne@Bussy

Year 1996

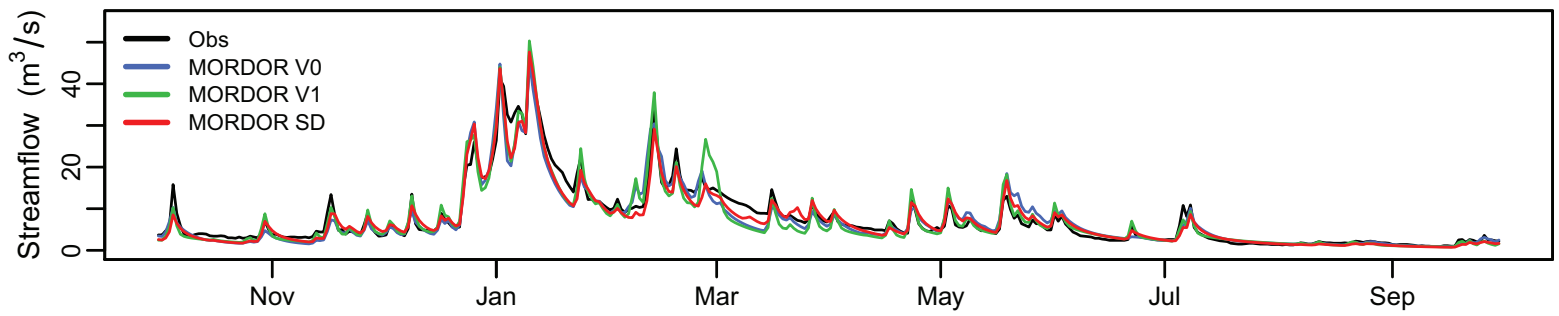

Year 1997

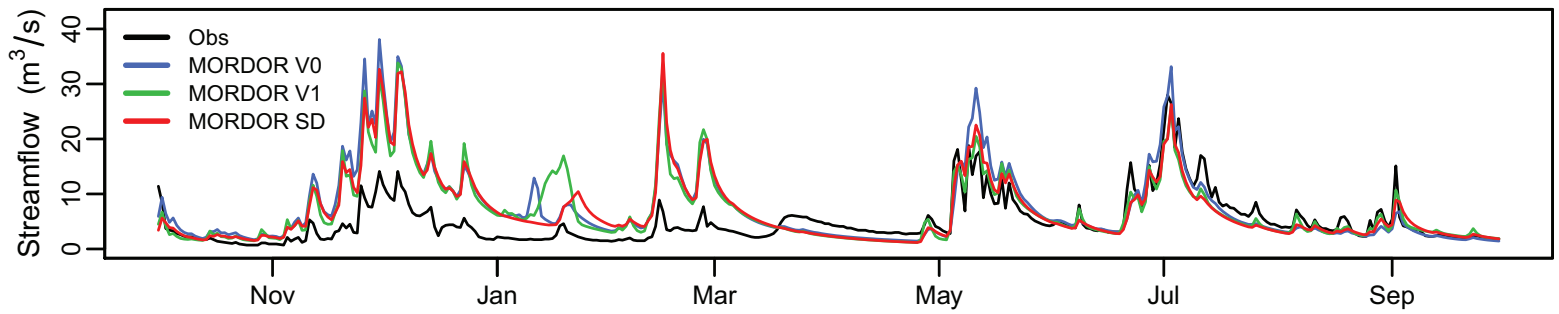

Year 1998

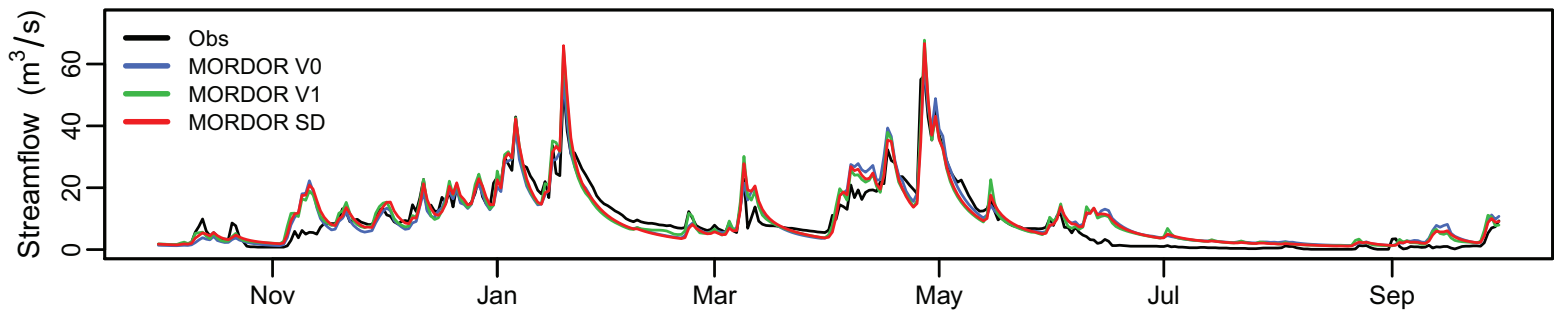

Year 1999

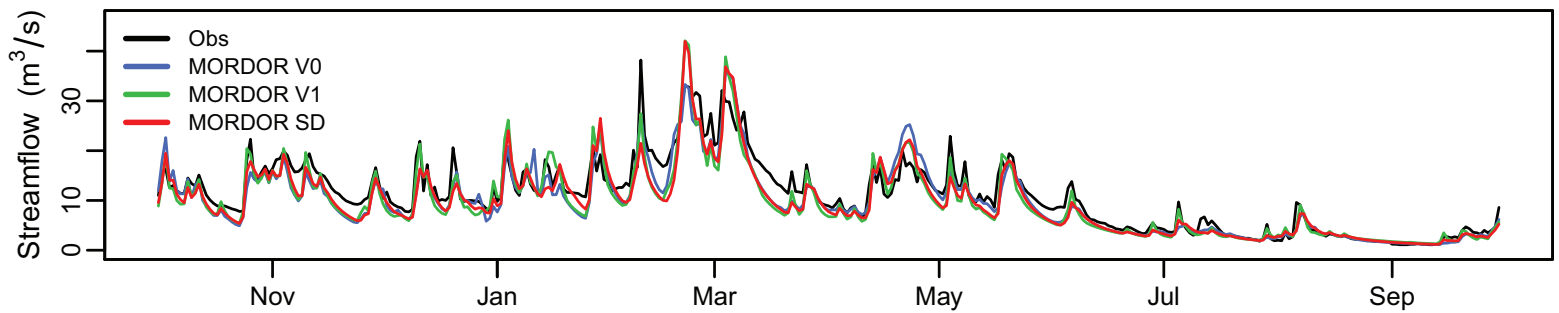

Year 2000

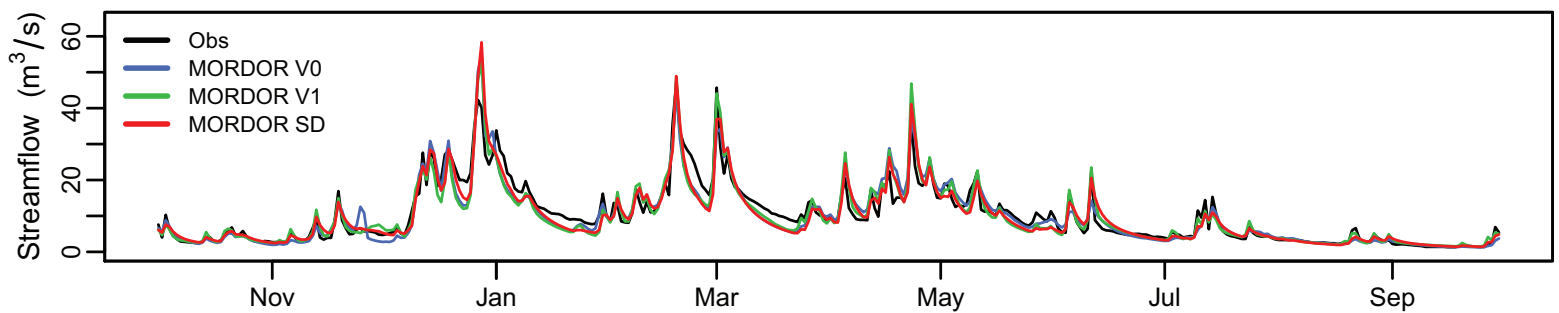

Year 2001

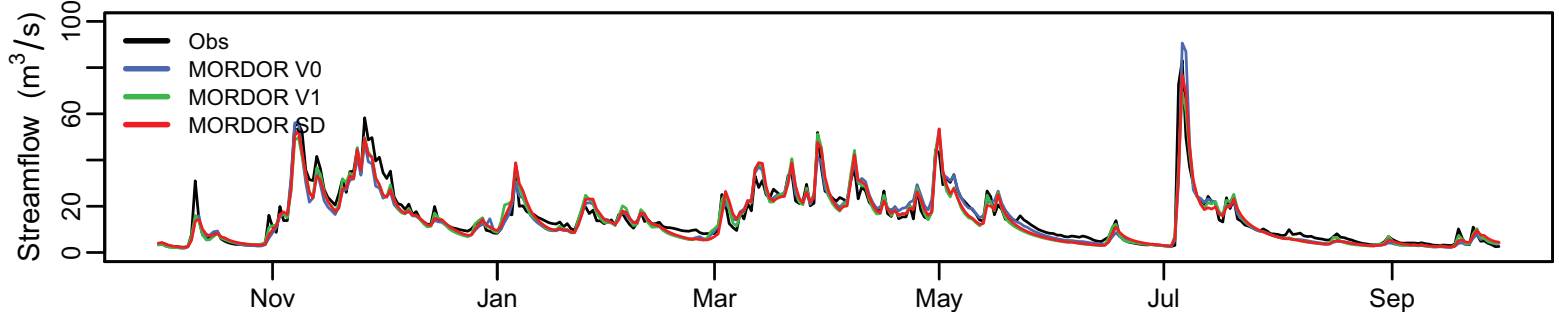



# Vienne@Bussy

Year 2002

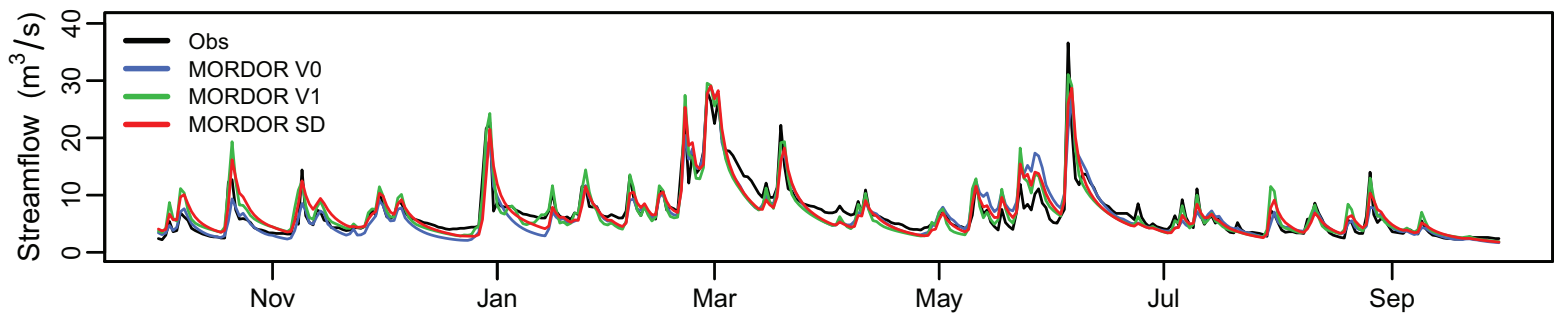

Year 2003

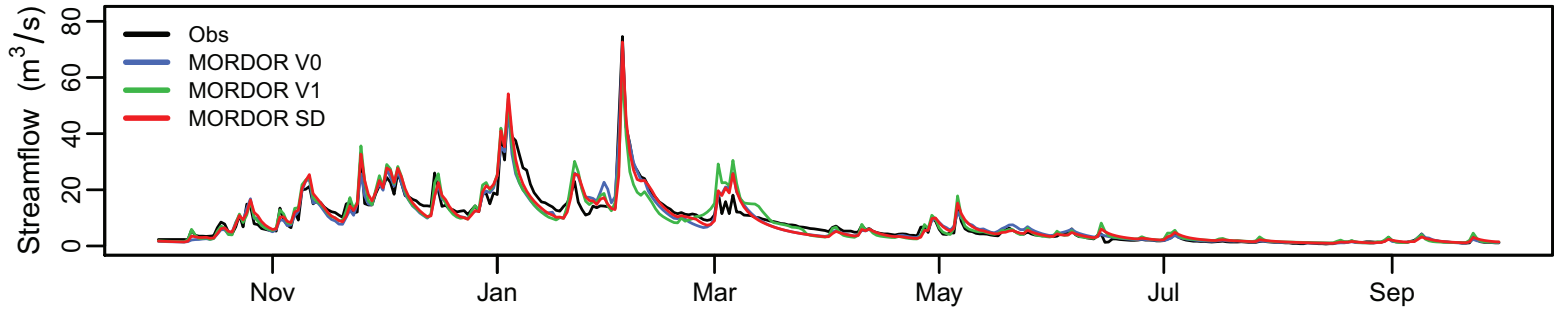

Year 2004

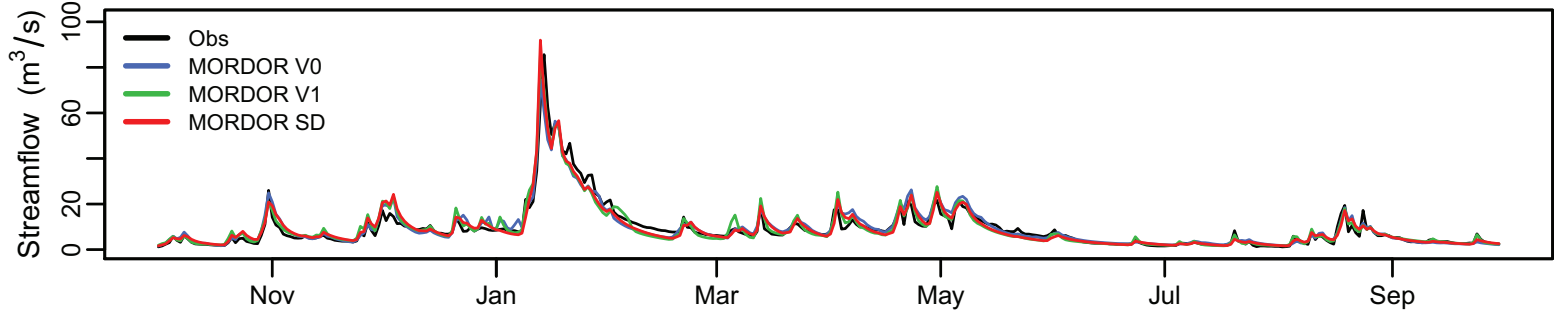

Year 2005

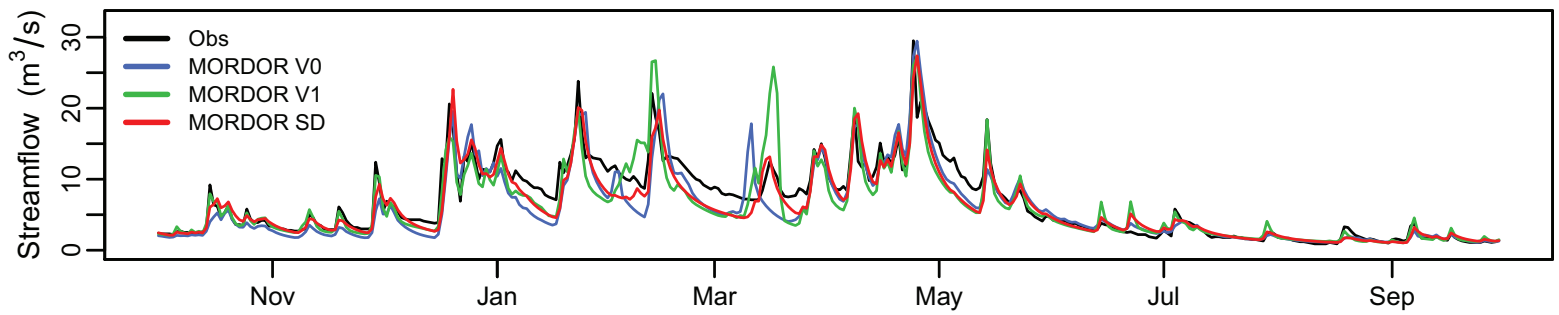

Year 2006

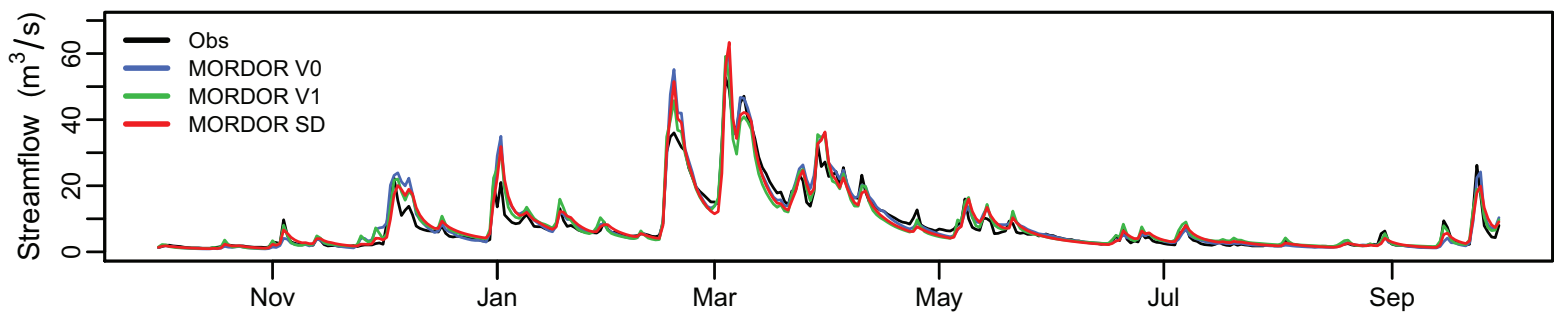

### **S3 Model comparison over evaluation periods**

This section details the performance of MORDOR V0, V1 and V2 over the evaluation periods P1 and P2. For the three considered models, tables S4 and S5 show the values of the individual associated evaluation metrics (NSE(Q), NSE(Qsea), NSE(dQ), NSE(FDC) and NSE(Qlow)) for all the catchments over the evaluation period P1 (table S4) and the evaluation period P2 (table S5). The following figures show, for the 50 catchments, the observed hydrograph (year by year) and those modeled by MORDOR V0, V1 and SD (evaluation model).

**Table S4:** The values of the individual associated evaluation metrics (NSE(Q), NSE(Qsea), NSE(dQ), NSE(FDC) and NSE(Qlow)) for MORDOR V0, V1 and SD for all the catchments over the period P1

| ID | BV                      | MORDOR V0 |           |         |          |           | MORDOR V1 |           |         |          |           | MORDOR SD |           |         |          |           |
|----|-------------------------|-----------|-----------|---------|----------|-----------|-----------|-----------|---------|----------|-----------|-----------|-----------|---------|----------|-----------|
|    |                         | NSE(Q)    | NSE(Qsea) | NSE(dQ) | NSE(FDC) | NSE(Qlow) | NSE(Q)    | NSE(Qsea) | NSE(dQ) | NSE(FDC) | NSE(Qlow) | NSE(Q)    | NSE(Qsea) | NSE(dQ) | NSE(FDC) | NSE(Qlow) |
| 1  | Agout@Fraise            | 0.838     | 0.849     | 0.795   | 0.747    | 0.889     | 0.925     | 0.906     | 0.889   | 0.805    | 0.917     | 0.911     | 0.896     | 0.902   | 0.813    | 0.917     |
| 2  | Agout@LaRaviege         | 0.342     | 0.483     | 0.452   | 0.237    | 0.701     | 0.699     | 0.725     | 0.633   | 0.406    | 0.786     | 0.706     | 0.727     | 0.693   | 0.499    | 0.789     |
| 3  | Allier@Poutes           | 0.759     | 0.842     | 0.818   | 0.273    | 0.752     | 0.926     | 0.915     | 0.825   | 0.582    | 0.851     | 0.888     | 0.913     | 0.868   | 0.674    | 0.880     |
| 4  | Ardeche@Sauze           | 0.937     | 0.935     | 0.858   | 0.875    | 0.883     | 0.938     | 0.959     | 0.860   | 0.909    | 0.927     | 0.923     | 0.954     | 0.855   | 0.896    | 0.933     |
| 5  | Arn@Taillades           | 0.936     | 0.957     | 0.891   | 0.848    | 0.874     | 0.939     | 0.974     | 0.930   | 0.905    | 0.957     | 0.920     | 0.972     | 0.935   | 0.930    | 0.958     |
| 6  | Arve@Arthaz             | 0.907     | 0.907     | 0.796   | 0.873    | 0.882     | 0.907     | 0.882     | 0.826   | 0.879    | 0.880     | 0.905     | 0.906     | 0.839   | 0.898    | 0.876     |
| 7  | Behine@LaPoutroie       | 0.737     | 0.639     | 0.516   | -0.341   | 0.662     | 0.564     | 0.490     | 0.656   | 0.262    | 0.641     | 0.567     | 0.656     | 0.546   | 0.368    | 0.631     |
| 8  | Breze@Meyrueis          | 0.889     | 0.802     | 0.442   | 0.282    | 0.779     | 0.860     | 0.840     | 0.602   | 0.602    | 0.857     | 0.863     | 0.864     | 0.553   | 0.777    | 0.874     |
| 9  | Bromme@Brommat          | 0.948     | 0.982     | 0.923   | 0.967    | 0.831     | 0.984     | 0.986     | 0.944   | 0.965    | 0.919     | 0.965     | 0.985     | 0.971   | 0.989    | 0.922     |
| 10 | Ceze@Bagnols            | 0.913     | 0.972     | 0.914   | 0.883    | 0.915     | 0.970     | 0.990     | 0.907   | 0.852    | 0.954     | 0.944     | 0.982     | 0.938   | 0.930    | 0.957     |
| 11 | Chassezac@SteMarguerite | 0.898     | 0.866     | 0.821   | 0.656    | 0.879     | 0.916     | 0.903     | 0.868   | 0.798    | 0.895     | 0.908     | 0.890     | 0.879   | 0.790    | 0.907     |
| 12 | Creuse@Age              | 0.630     | 0.577     | 0.235   | 0.362    | 0.192     | 0.801     | 0.572     | 0.417   | 0.550    | 0.586     | 0.791     | 0.563     | 0.608   | 0.540    | 0.673     |
| 13 | Dordogne@Bort           | 0.867     | 0.821     | 0.933   | 0.657    | 0.760     | 0.886     | 0.845     | 0.806   | 0.637    | 0.804     | 0.865     | 0.826     | 0.798   | 0.661    | 0.829     |
| 14 | Doubs@Brenet            | 0.851     | 0.945     | 0.944   | 0.549    | 0.932     | 0.972     | 0.970     | 0.951   | 0.924    | 0.982     | 0.975     | 0.971     | 0.942   | 0.912    | 0.978     |
| 15 | Doubs@Neublans          | 0.902     | 0.968     | 0.899   | 0.674    | 0.920     | 0.952     | 0.980     | 0.934   | 0.857    | 0.975     | 0.952     | 0.980     | 0.929   | 0.859    | 0.975     |
| 16 | Drac@Sautet             | 0.843     | 0.828     | 0.792   | 0.815    | 0.783     | 0.907     | 0.873     | 0.837   | 0.808    | 0.896     | 0.918     | 0.839     | 0.871   | 0.811    | 0.888     |
| 17 | Durance@Clapiere        | 0.631     | 0.597     | 0.459   | 0.616    | 0.268     | 0.801     | 0.640     | 0.540   | 0.628    | 0.867     | 0.842     | 0.491     | 0.699   | 0.578    | 0.844     |
| 18 | Eyrieux@Pontpierre      | 0.748     | 0.756     | 0.874   | 0.701    | 0.706     | 0.802     | 0.812     | 0.835   | 0.489    | 0.827     | 0.829     | 0.756     | 0.868   | 0.433    | 0.678     |
| 19 | Gage@Gagell             | 0.934     | 0.888     | 0.912   | 0.818    | 0.764     | 0.966     | 0.945     | 0.969   | 0.903    | 0.950     | 0.971     | 0.933     | 0.962   | 0.913    | 0.942     |
| 20 | Gardon@Corbes           | 0.953     | 0.969     | 0.952   | 0.873    | 0.886     | 0.970     | 0.972     | 0.979   | 0.940    | 0.934     | 0.968     | 0.969     | 0.977   | 0.950    | 0.943     |
| 21 | Gardon@Generargues      | 0.803     | 0.871     | 0.840   | 0.863    | 0.798     | 0.854     | 0.914     | 0.926   | 0.880    | 0.776     | 0.870     | 0.904     | 0.921   | 0.884    | 0.767     |
| 22 | GaveEstaubé@Gloriettes  | 0.701     | 0.666     | 0.477   | 0.580    | 0.408     | 0.480     | 0.685     | 0.729   | 0.607    | 0.339     | 0.483     | 0.644     | 0.703   | 0.670    | 0.293     |
| 23 | Goussant@PontRolland    | 0.849     | 0.773     | 0.634   | 0.850    | 0.487     | 0.784     | 0.825     | 0.815   | 0.886    | 0.509     | 0.904     | 0.813     | 0.829   | 0.901    | 0.674     |
| 24 | Loire@Basset            | 0.909     | 0.896     | 0.940   | 0.973    | 0.825     | 0.964     | 0.980     | 0.905   | 0.979    | 0.940     | 0.963     | 0.974     | 0.930   | 0.980    | 0.940     |
| 25 | Loire@LaPalisse         | 0.871     | 0.960     | 0.910   | 0.964    | 0.877     | 0.959     | 0.988     | 0.869   | 0.970    | 0.953     | 0.952     | 0.984     | 0.902   | 0.969    | 0.952     |
| 26 | Lot@Castelnau           | 0.865     | 0.811     | 0.879   | 0.866    | 0.384     | 0.859     | 0.900     | 0.901   | 0.851    | 0.830     | 0.866     | 0.919     | 0.901   | 0.859    | 0.904     |
| 27 | Mimente@Florac          | 0.618     | 0.391     | 0.504   | 0.688    | -0.310    | 0.684     | 0.634     | 0.640   | 0.686    | 0.457     | 0.736     | 0.666     | 0.616   | 0.627    | 0.774     |
| 28 | Montane@Eyrein          | 0.757     | 0.744     | 0.914   | 0.644    | 0.898     | 0.863     | 0.702     | 0.908   | 0.630    | 0.478     | 0.877     | 0.830     | 0.903   | 0.761    | 0.685     |
| 29 | Oriege@Campauleil       | 0.958     | 0.977     | 0.898   | 0.928    | 0.899     | 0.957     | 0.981     | 0.965   | 0.967    | 0.895     | 0.956     | 0.967     | 0.965   | 0.968    | 0.913     |
| 30 | Ouveze@Bedarrides       | 0.948     | 0.955     | 0.890   | 0.941    | 0.560     | 0.951     | 0.964     | 0.955   | 0.948    | 0.859     | 0.953     | 0.960     | 0.947   | 0.951    | 0.884     |
| 31 | Rizzanese@Barrage       | 0.880     | 0.851     | 0.880   | 0.811    | 0.857     | 0.838     | 0.873     | 0.915   | 0.882    | 0.878     | 0.799     | 0.939     | 0.906   | 0.882    | 0.876     |
| 32 | Romanche@Chambon        | 0.574     | 0.209     | 0.620   | 0.605    | 0.460     | 0.569     | 0.366     | 0.709   | 0.535    | 0.601     | 0.356     | 0.528     | 0.693   | 0.541    | 0.591     |
| 33 | Roya@Breil              | 0.457     | 0.716     | 0.674   | 0.342    | 0.898     | 0.804     | 0.577     | 0.890   | 0.584    | 0.906     | 0.803     | 0.589     | 0.874   | 0.657    | 0.908     |
| 34 | Salat@Roquefort         | 0.885     | 0.985     | 0.898   | 0.890    | 0.934     | 0.937     | 0.982     | 0.945   | 0.912    | 0.961     | 0.925     | 0.984     | 0.947   | 0.920    | 0.964     |
| 35 | Sioule@Fades            | 0.900     | 0.860     | 0.969   | 0.770    | 0.961     | 0.936     | 0.898     | 0.950   | 0.840    | 0.974     | 0.937     | 0.923     | 0.954   | 0.859    | 0.967     |
| 36 | Souloise@Infernet       | 0.889     | 0.865     | 0.892   | 0.854    | 0.881     | 0.884     | 0.949     | 0.913   | 0.896    | 0.898     | 0.871     | 0.945     | 0.890   | 0.889    | 0.916     |
| 37 | Stura@Lanzo             | 0.756     | 0.504     | 0.564   | 0.449    | 0.454     | 0.641     | 0.880     | 0.640   | 0.687    | 0.509     | 0.640     | 0.876     | 0.553   | 0.675    | 0.602     |
| 38 | Tarn@Cocures            | 0.789     | 0.763     | 0.889   | 0.648    | 0.788     | 0.868     | 0.845     | 0.888   | 0.875    | 0.569     | 0.824     | 0.855     | 0.873   | 0.849    | 0.628     |
| 39 | Tarn@Millau             | 0.875     | 0.941     | 0.979   | 0.872    | 0.976     | 0.946     | 0.930     | 0.983   | 0.970    | 0.985     | 0.940     | 0.928     | 0.984   | 0.962    | 0.979     |
| 40 | Tarn@Montbrun           | 0.898     | 0.914     | 0.977   | 0.956    | 0.866     | 0.942     | 0.945     | 0.979   | 0.967    | 0.921     | 0.941     | 0.945     | 0.976   | 0.967    | 0.930     |
| 41 | Tarn@Pinet              | 0.829     | 0.881     | 0.764   | 0.900    | 0.846     | 0.882     | 0.888     | 0.812   | 0.934    | 0.873     | 0.860     | 0.879     | 0.806   | 0.933    | 0.874     |
| 42 | Tarnon@Florac           | 0.555     | 0.663     | 0.203   | 0.786    | 0.601     | 0.605     | 0.657     | 0.138   | 0.904    | 0.636     | 0.613     | 0.679     | -0.051  | 0.893    | 0.643     |
| 43 | Taurion@RocheTalamie    | 0.827     | 0.682     | 0.481   | 0.830    | 0.688     | 0.803     | 0.436     | 0.135   | 0.856    | 0.817     | 0.785     | 0.336     | 0.310   | 0.843    | 0.639     |
| 44 | Tech@Reynes             | 0.905     | 0.911     | 0.971   | 0.938    | 0.930     | 0.934     | 0.943     | 0.976   | 0.968    | 0.975     | 0.915     | 0.916     | 0.972   | 0.964    | 0.975     |
| 45 | Tet@Vinca               | 0.931     | 0.907     | 0.913   | 0.962    | 0.918     | 0.957     | 0.920     | 0.951   | 0.948    | 0.964     | 0.933     | 0.885     | 0.935   | 0.944    | 0.967     |
| 46 | Tinee@PontLune          | 0.825     | 0.843     | 0.794   | 0.868    | 0.869     | 0.853     | 0.887     | 0.886   | 0.927    | 0.906     | 0.857     | 0.879     | 0.888   | 0.924    | 0.927     |
| 47 | Truyere@Grandval        | 0.572     | 0.578     | -0.018  | 0.667    | 0.584     | 0.673     | 0.695     | 0.584   | 0.770    | 0.574     | 0.719     | 0.674     | 0.520   | 0.770    | 0.636     |
| 48 | Ubaye@RocheRousse       | 0.611     | 0.568     | 0.224   | 0.862    | 0.771     | 0.676     | 0.771     | 0.709   | 0.907    | 0.909     | 0.314     | 0.769     | 0.780   | 0.903    | 0.900     |
| 49 | Vence@Francheville      | 0.756     | 0.846     | 0.868   | 0.906    | 0.935     | 0.955     | 0.869     | 0.963   | 0.964    | 0.971     | 0.957     | 0.899     | 0.953   | 0.967    | 0.965     |
| 50 | Vienne@Bussy            | 0.745     | 0.897     | 0.832   | 0.947    | 0.941     | 0.958     | 0.910     | 0.928   | 0.968    | 0.977     | 0.946     | 0.940     | 0.918   | 0.975    | 0.976     |

**Table S5:** The values of the individual associated evaluation metrics (NSE(Q), NSE(Qsea), NSE(dQ), NSE(FDC) and NSE(Qlow)) for MORDOR V0, V1 and SD for all the catchments over the period P2

| ID | BV                      | MORDOR V0 |           |         |          |           | MORDOR V1 |           |         |          |           | MORDOR SD |           |         |          |           |
|----|-------------------------|-----------|-----------|---------|----------|-----------|-----------|-----------|---------|----------|-----------|-----------|-----------|---------|----------|-----------|
|    |                         | NSE(Q)    | NSE(Qsea) | NSE(dQ) | NSE(FDC) | NSE(Qlow) | NSE(Q)    | NSE(Qsea) | NSE(dQ) | NSE(FDC) | NSE(Qlow) | NSE(Q)    | NSE(Qsea) | NSE(dQ) | NSE(FDC) | NSE(Qlow) |
| 1  | Agout@Fraise            | 0.904     | 0.899     | 0.867   | 0.864    | 0.916     | 0.965     | 0.949     | 0.943   | 0.873    | 0.960     | 0.958     | 0.929     | 0.948   | 0.870    | 0.949     |
| 2  | Agout@LaRaviege         | 0.927     | 0.950     | 0.937   | 0.788    | 0.908     | 0.961     | 0.977     | 0.965   | 0.780    | 0.955     | 0.957     | 0.973     | 0.964   | 0.905    | 0.952     |
| 3  | Allier@Poutes           | 0.871     | 0.897     | 0.782   | 0.827    | 0.802     | 0.894     | 0.916     | 0.797   | 0.820    | 0.909     | 0.883     | 0.914     | 0.802   | 0.794    | 0.916     |
| 4  | Ardeche@Sauze           | 0.562     | 0.737     | 0.426   | 0.539    | 0.591     | 0.647     | 0.704     | 0.477   | 0.451    | 0.787     | 0.656     | 0.709     | 0.506   | 0.215    | 0.788     |
| 5  | Arn@Taillades           | 0.843     | 0.847     | 0.852   | 0.763    | 0.687     | 0.772     | 0.850     | 0.782   | 0.589    | 0.823     | 0.714     | 0.868     | 0.766   | 0.365    | 0.826     |
| 6  | Arve@Arthaz             | 0.954     | 0.980     | 0.932   | 0.967    | 0.917     | 0.973     | 0.983     | 0.951   | 0.979    | 0.917     | 0.973     | 0.988     | 0.966   | 0.971    | 0.915     |
| 7  | Behine@LaPoutroie       | 0.944     | 0.979     | 0.901   | 0.791    | 0.937     | 0.953     | 0.975     | 0.936   | 0.920    | 0.950     | 0.961     | 0.980     | 0.962   | 0.910    | 0.946     |
| 8  | Breze@Meyrueis          | 0.845     | 0.893     | 0.797   | 0.854    | 0.796     | 0.947     | 0.925     | 0.813   | 0.880    | 0.890     | 0.939     | 0.925     | 0.847   | 0.917    | 0.888     |
| 9  | Bromme@Brommat          | 0.393     | 0.660     | 0.538   | 0.263    | 0.356     | 0.862     | 0.562     | 0.586   | 0.030    | 0.595     | 0.870     | 0.509     | 0.611   | 0.365    | 0.593     |
| 10 | Ceze@Bagnols            | 0.759     | 0.832     | 0.418   | 0.710    | 0.814     | 0.905     | 0.799     | 0.327   | 0.451    | 0.691     | 0.872     | 0.826     | 0.589   | 0.760    | 0.830     |
| 11 | Chassezac@SteMarguerite | 0.937     | 0.927     | 0.889   | 0.758    | 0.934     | 0.926     | 0.974     | 0.944   | 0.835    | 0.984     | 0.912     | 0.975     | 0.944   | 0.841    | 0.986     |
| 12 | Creuse@Age              | 0.919     | 0.937     | 0.877   | 0.739    | 0.957     | 0.943     | 0.979     | 0.924   | 0.828    | 0.972     | 0.952     | 0.979     | 0.919   | 0.890    | 0.977     |
| 13 | Dordogne@Bort           | 0.869     | 0.871     | 0.862   | 0.584    | 0.781     | 0.951     | 0.902     | 0.910   | 0.860    | 0.915     | 0.953     | 0.912     | 0.897   | 0.857    | 0.917     |
| 14 | Doubs@Brenet            | 0.646     | 0.506     | 0.575   | 0.106    | -0.038    | 0.818     | 0.546     | 0.574   | 0.599    | 0.497     | 0.823     | 0.610     | 0.512   | 0.621    | 0.570     |
| 15 | Doubs@Neublans          | 0.887     | 0.814     | 0.764   | 0.586    | 0.749     | 0.869     | 0.896     | 0.890   | 0.610    | 0.884     | 0.895     | 0.888     | 0.871   | 0.641    | 0.888     |
| 16 | Drac@Sautet             | 0.928     | 0.910     | 0.905   | 0.880    | 0.847     | 0.954     | 0.953     | 0.949   | 0.898    | 0.896     | 0.956     | 0.950     | 0.954   | 0.893    | 0.874     |
| 17 | Durance@Clapiere        | 0.946     | 0.953     | 0.906   | 0.901    | 0.815     | 0.970     | 0.980     | 0.973   | 0.949    | 0.938     | 0.966     | 0.978     | 0.964   | 0.946    | 0.907     |
| 18 | Eyrieux@Pontpierre      | 0.883     | 0.840     | 0.805   | 0.706    | 0.771     | 0.911     | 0.872     | 0.860   | 0.846    | 0.924     | 0.917     | 0.850     | 0.881   | 0.866    | 0.920     |
| 19 | Gage@Gagell             | 0.646     | 0.654     | 0.558   | 0.318    | 0.542     | 0.800     | 0.609     | 0.806   | 0.757    | 0.803     | 0.802     | 0.538     | 0.810   | 0.766    | 0.781     |
| 20 | Gardon@Corbes           | 0.825     | 0.846     | 0.811   | -0.121   | 0.816     | 0.753     | 0.866     | 0.836   | 0.745    | 0.772     | 0.829     | 0.865     | 0.882   | 0.824    | 0.818     |
| 21 | Gardon@Generargues      | 0.930     | 0.925     | 0.917   | 0.967    | 0.891     | 0.950     | 0.980     | 0.947   | 0.979    | 0.916     | 0.952     | 0.977     | 0.947   | 0.977    | 0.904     |
| 22 | GaveEstaubé@Gloriettes  | 0.897     | 0.960     | 0.856   | 0.968    | 0.934     | 0.952     | 0.986     | 0.927   | 0.976    | 0.953     | 0.952     | 0.985     | 0.918   | 0.975    | 0.942     |
| 23 | Goussant@PontRolland    | 0.784     | 0.858     | 0.897   | 0.849    | 0.683     | 0.869     | 0.934     | 0.853   | 0.883    | 0.846     | 0.857     | 0.936     | 0.886   | 0.891    | 0.854     |
| 24 | Loire@Basset            | 0.293     | 0.656     | 0.642   | 0.603    | 0.054     | 0.596     | 0.762     | 0.621   | 0.683    | 0.574     | 0.598     | 0.739     | 0.666   | 0.726    | 0.604     |
| 25 | Loire@LaPalisse         | 0.853     | 0.834     | 0.548   | 0.884    | 0.397     | 0.873     | 0.887     | 0.514   | 0.857    | 0.577     | 0.879     | 0.877     | 0.649   | 0.882    | 0.530     |
| 26 | Lot@Castelnau           | 0.947     | 0.965     | 0.930   | 0.943    | 0.636     | 0.935     | 0.978     | 0.974   | 0.944    | 0.962     | 0.945     | 0.985     | 0.976   | 0.958    | 0.983     |
| 27 | Mimente@Florac          | 0.937     | 0.939     | 0.941   | 0.902    | 0.486     | 0.938     | 0.958     | 0.977   | 0.927    | 0.850     | 0.939     | 0.968     | 0.976   | 0.958    | 0.926     |
| 28 | Montane@Eyrein          | 0.886     | 0.889     | 0.794   | 0.774    | 0.679     | 0.883     | 0.896     | 0.920   | 0.896    | 0.801     | 0.880     | 0.902     | 0.901   | 0.923    | 0.813     |
| 29 | Oriege@Campauleil       | 0.652     | 0.598     | 0.462   | 0.186    | 0.350     | 0.592     | 0.615     | 0.771   | 0.614    | 0.515     | 0.602     | 0.683     | 0.713   | 0.766    | 0.529     |
| 30 | Ouveze@Bedarrides       | 0.868     | 0.808     | 0.833   | 0.771    | 0.278     | 0.804     | 0.885     | 0.883   | 0.773    | 0.750     | 0.815     | 0.881     | 0.894   | 0.796    | 0.815     |
| 31 | Rizzanese@Barrage       | 0.917     | 0.976     | 0.921   | 0.905    | 0.934     | 0.887     | 0.971     | 0.934   | 0.959    | 0.972     | 0.866     | 0.990     | 0.928   | 0.953    | 0.970     |
| 32 | Romanche@Chambon        | 0.865     | 0.847     | 0.924   | 0.808    | 0.957     | 0.918     | 0.817     | 0.974   | 0.915    | 0.982     | 0.890     | 0.922     | 0.974   | 0.915    | 0.979     |
| 33 | Roya@Breil              | 0.811     | 0.838     | 0.873   | 0.783    | 0.829     | 0.896     | 0.904     | 0.918   | 0.833    | 0.859     | 0.886     | 0.905     | 0.922   | 0.856    | 0.869     |
| 34 | Salat@Roquefort         | 0.284     | -0.057    | 0.547   | 0.353    | 0.543     | 0.648     | -0.135    | 0.694   | 0.532    | 0.479     | 0.635     | 0.156     | 0.702   | 0.586    | 0.435     |
| 35 | Sioule@Fades            | 0.847     | 0.684     | 0.889   | 0.452    | 0.869     | 0.617     | 0.760     | 0.891   | 0.766    | 0.883     | 0.546     | 0.784     | 0.894   | 0.547    | 0.885     |
| 36 | Souloise@Infernet       | 0.928     | 0.897     | 0.982   | 0.930    | 0.970     | 0.928     | 0.964     | 0.983   | 0.919    | 0.978     | 0.912     | 0.961     | 0.975   | 0.911    | 0.986     |
| 37 | Stura@Lanzo             | 0.909     | 0.936     | 0.974   | 0.900    | 0.910     | 0.939     | 0.943     | 0.980   | 0.961    | 0.920     | 0.933     | 0.942     | 0.975   | 0.956    | 0.937     |
| 38 | Tarn@Cocures            | 0.851     | 0.927     | 0.883   | 0.848    | 0.799     | 0.907     | 0.906     | 0.904   | 0.936    | 0.896     | 0.902     | 0.901     | 0.908   | 0.926    | 0.901     |
| 39 | Tarn@Millau             | 0.632     | 0.793     | 0.508   | 0.494    | 0.081     | 0.719     | 0.729     | 0.599   | 0.750    | 0.536     | 0.733     | 0.721     | 0.594   | 0.734    | 0.612     |
| 40 | Tarn@Montbrun           | 0.768     | 0.723     | 0.858   | 0.861    | 0.658     | 0.824     | 0.866     | 0.861   | 0.610    | 0.693     | 0.835     | 0.838     | 0.864   | 0.620    | 0.682     |
| 41 | Tarn@Pinet              | 0.899     | 0.939     | 0.968   | 0.926    | 0.946     | 0.910     | 0.927     | 0.970   | 0.956    | 0.956     | 0.876     | 0.921     | 0.977   | 0.955    | 0.937     |
| 42 | Tarnon@Florac           | 0.923     | 0.898     | 0.936   | 0.897    | 0.903     | 0.939     | 0.914     | 0.925   | 0.971    | 0.934     | 0.922     | 0.891     | 0.919   | 0.970    | 0.919     |
| 43 | Taurion@RocheTalamie    | 0.875     | 0.867     | 0.804   | 0.901    | 0.808     | 0.870     | 0.883     | 0.809   | 0.924    | 0.926     | 0.858     | 0.862     | 0.785   | 0.917    | 0.926     |
| 44 | Tech@Reynes             | 0.596     | 0.631     | 0.026   | 0.853    | 0.579     | 0.588     | 0.610     | 0.284   | 0.812    | 0.717     | 0.560     | 0.581     | 0.313   | 0.815    | 0.698     |
| 45 | Tet@Vinca               | 0.787     | 0.321     | 0.382   | 0.780    | 0.713     | 0.859     | 0.776     | 0.351   | 0.873    | 0.683     | 0.876     | 0.704     | 0.456   | 0.837    | 0.721     |
| 46 | Tinee@PontLune          | 0.838     | 0.895     | 0.854   | 0.936    | 0.943     | 0.900     | 0.928     | 0.892   | 0.954    | 0.972     | 0.901     | 0.930     | 0.903   | 0.950    | 0.979     |
| 47 | Truyere@Grandval        | 0.623     | 0.935     | 0.842   | 0.903    | 0.962     | 0.913     | 0.965     | 0.834   | 0.975    | 0.980     | 0.902     | 0.965     | 0.863   | 0.972    | 0.979     |
| 48 | Ubaye@RocheRousse       | 0.707     | 0.759     | 0.823   | 0.895    | 0.872     | 0.945     | 0.811     | 0.936   | 0.924    | 0.868     | 0.951     | 0.844     | 0.927   | 0.931    | 0.864     |
| 49 | Vence@Francheville      | 0.386     | 0.384     | 0.390   | 0.655    | 0.556     | 0.931     | 0.494     | 0.774   | 0.779    | 0.614     | 0.935     | 0.582     | 0.740   | 0.788    | 0.525     |
| 50 | Vienne@Bussy            | 0.438     | 0.641     | 0.569   | 0.863    | 0.825     | 0.818     | 0.601     | 0.740   | 0.854    | 0.816     | 0.726     | 0.617     | 0.830   | 0.836    | 0.789     |

# Agout@Fraise

Year 1974

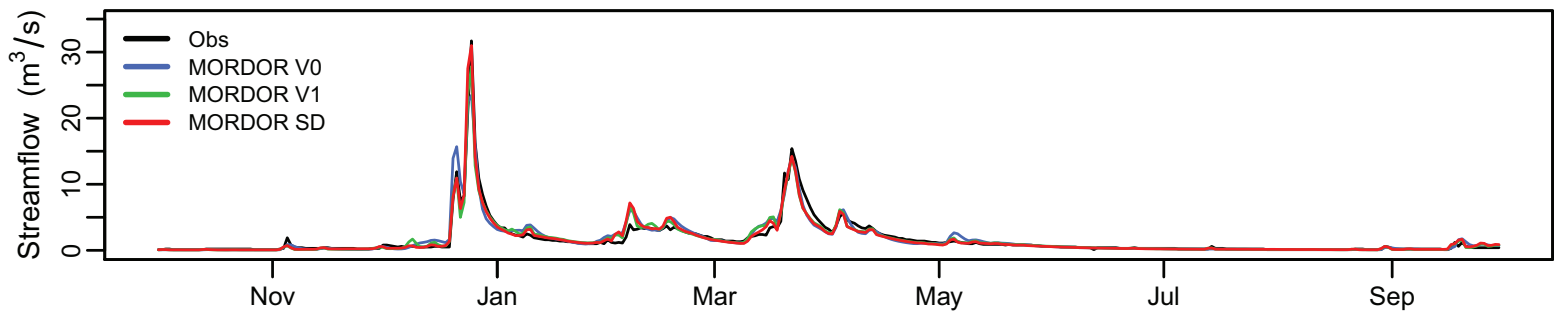

Year 1975

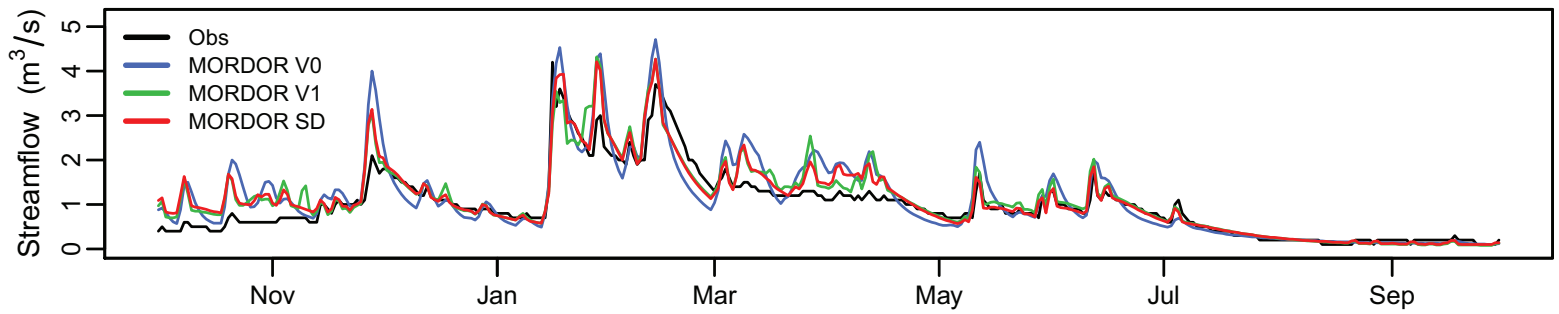

Year 1976

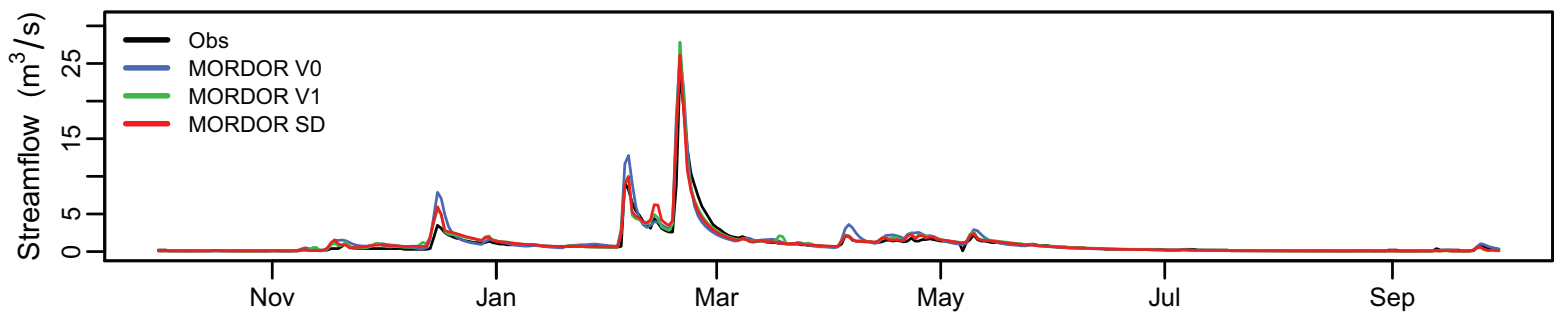

Year 1977

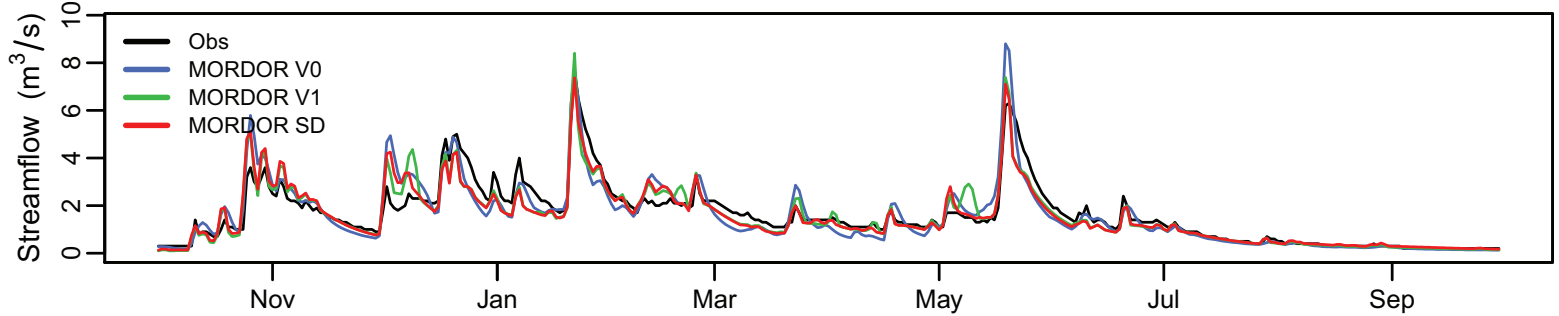

Year 1978

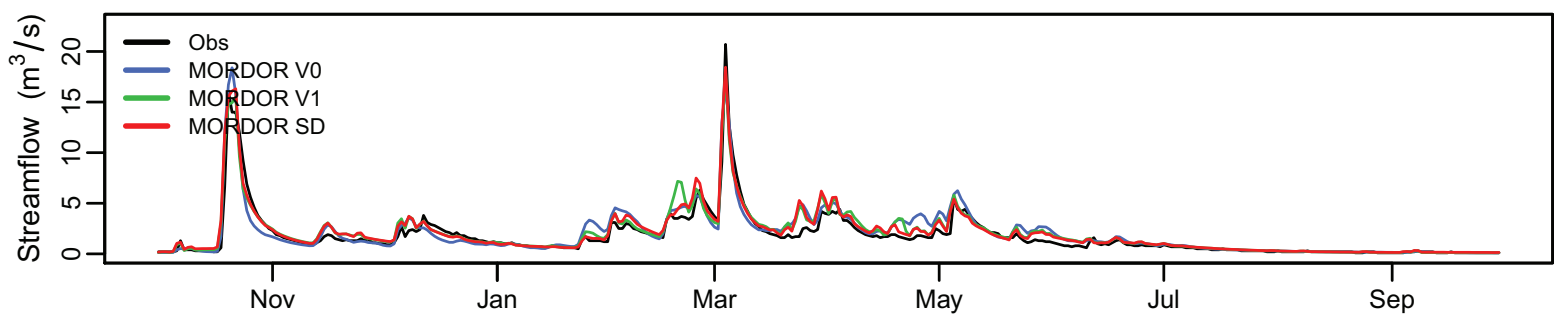

Year 1979

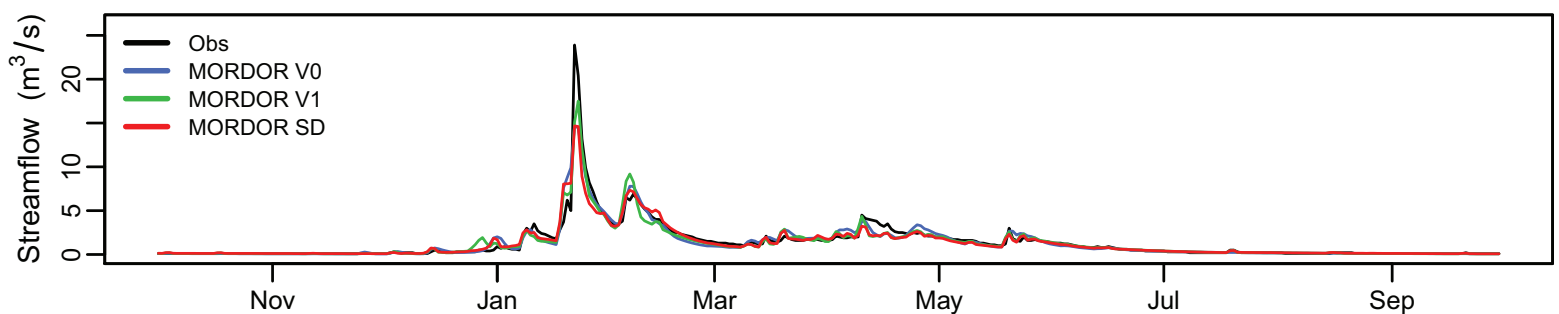

# Agout@Fraise

Year 1980

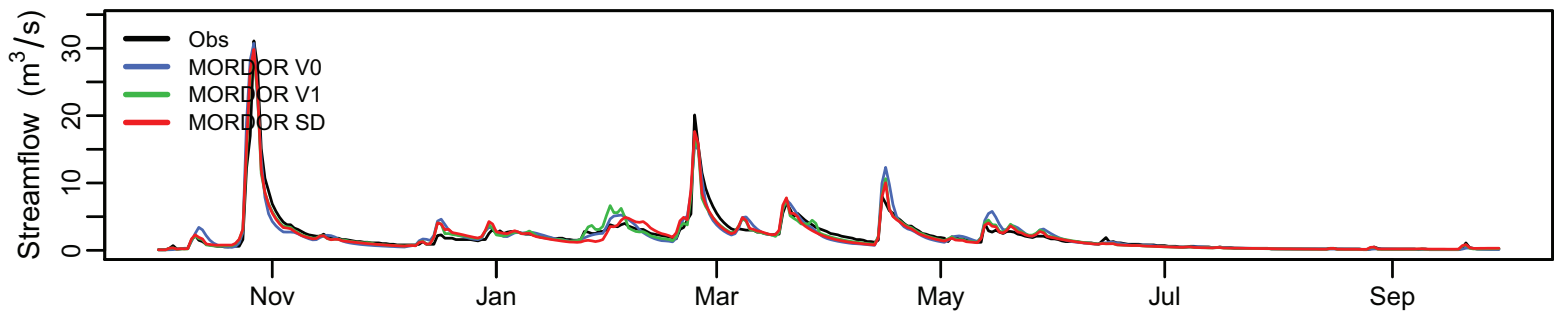

Year 1981

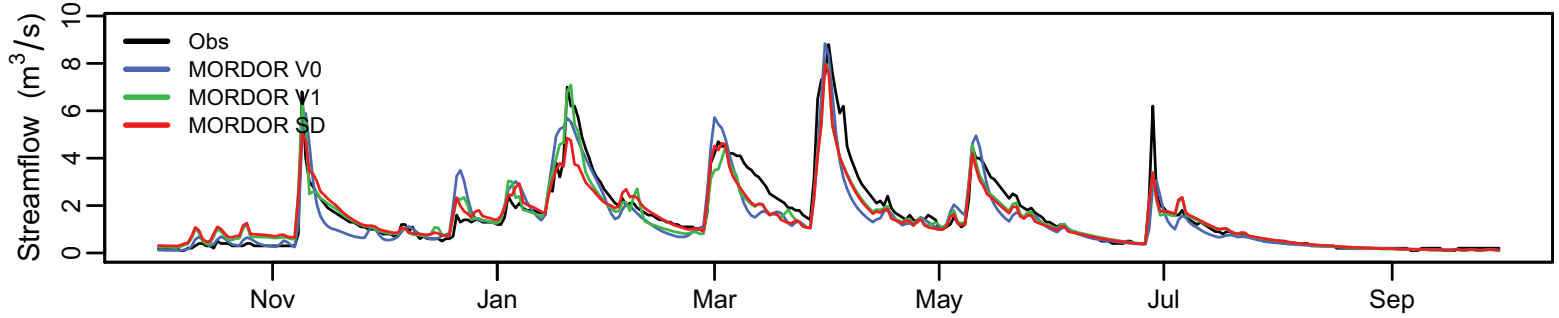

Year 1982

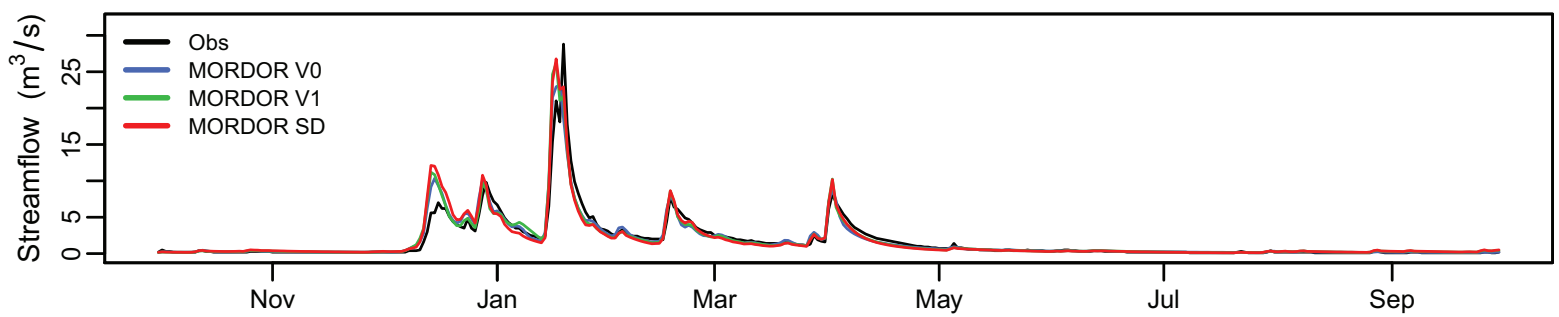

Year 1983

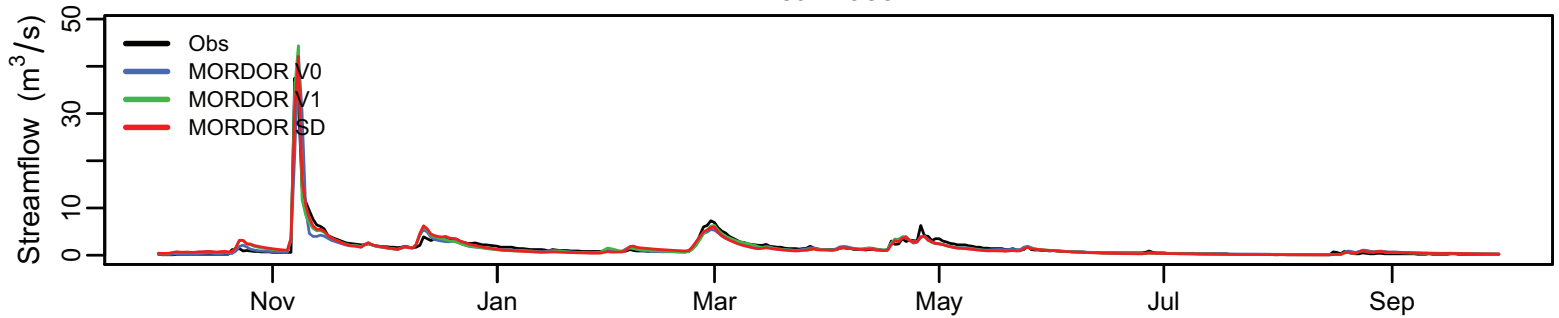

Year 1984

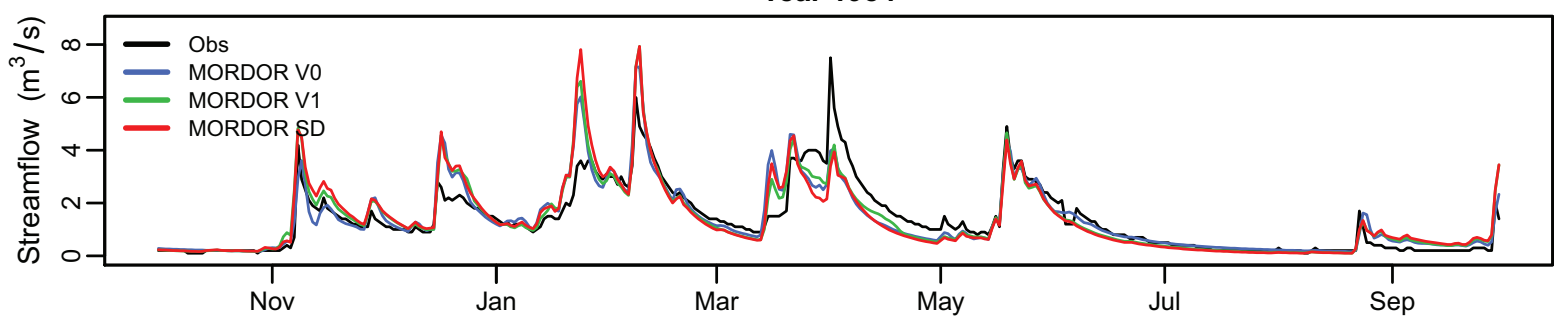

Year 1985

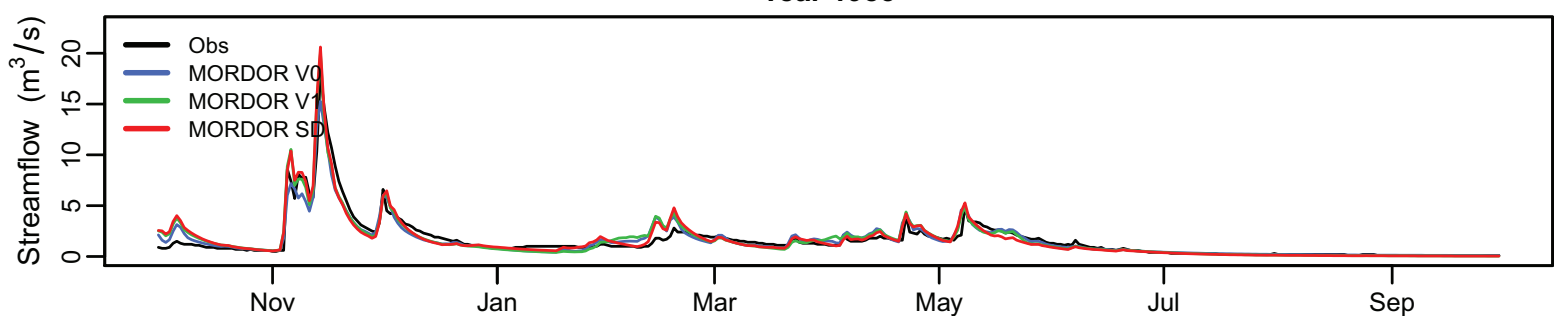

# Agout@Fraise

Year 1986

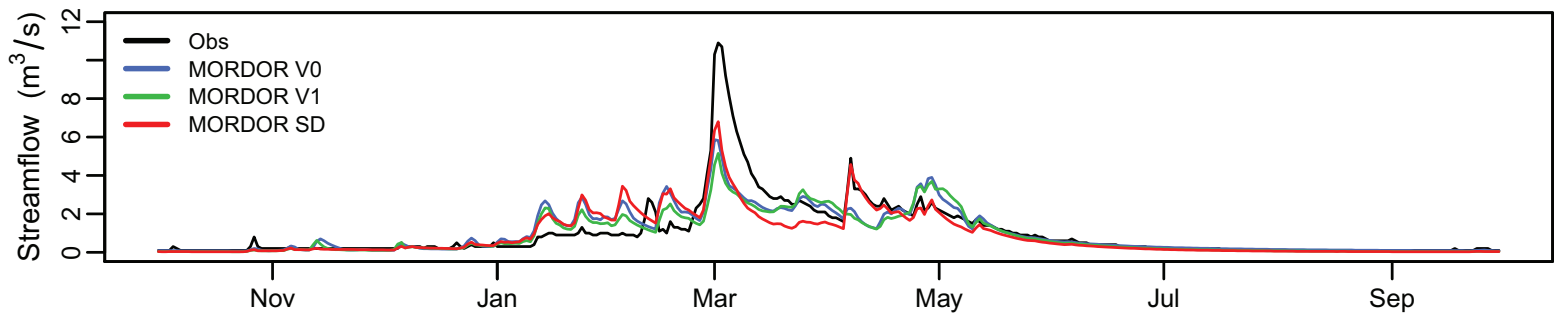

Year 1987

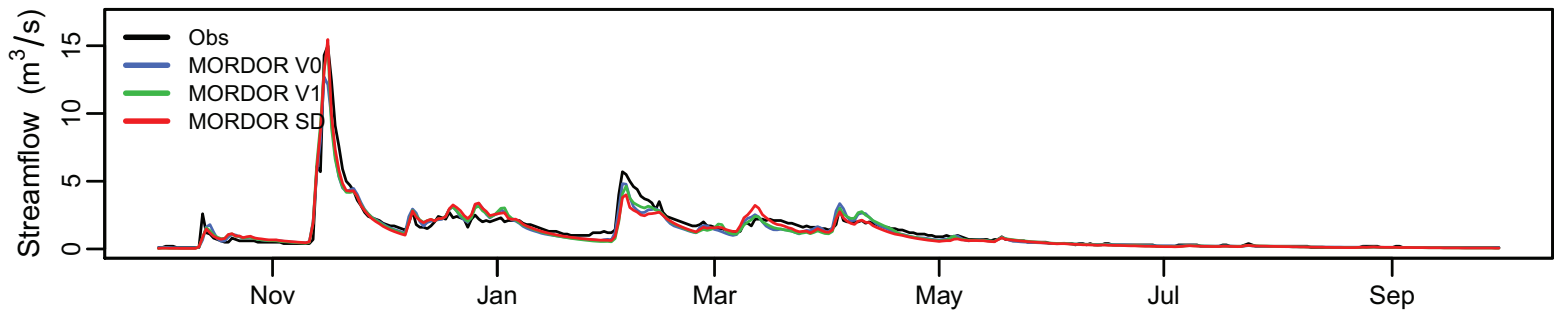

Year 1988

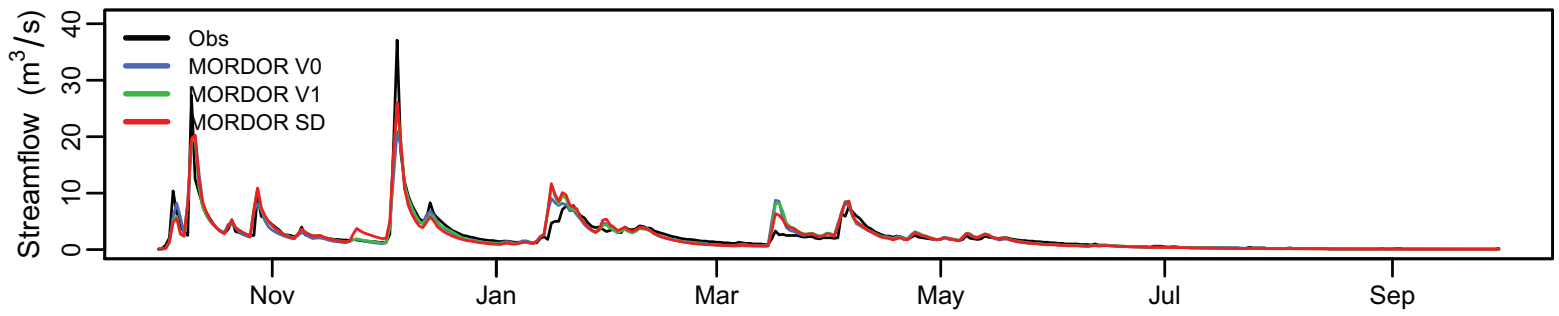

# Agout@LaRaviege

Year 1974

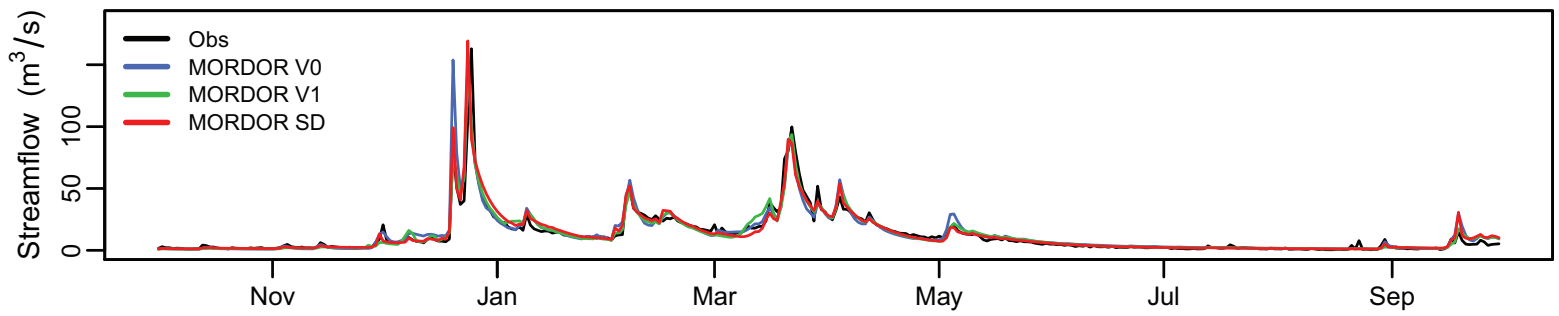

Year 1975

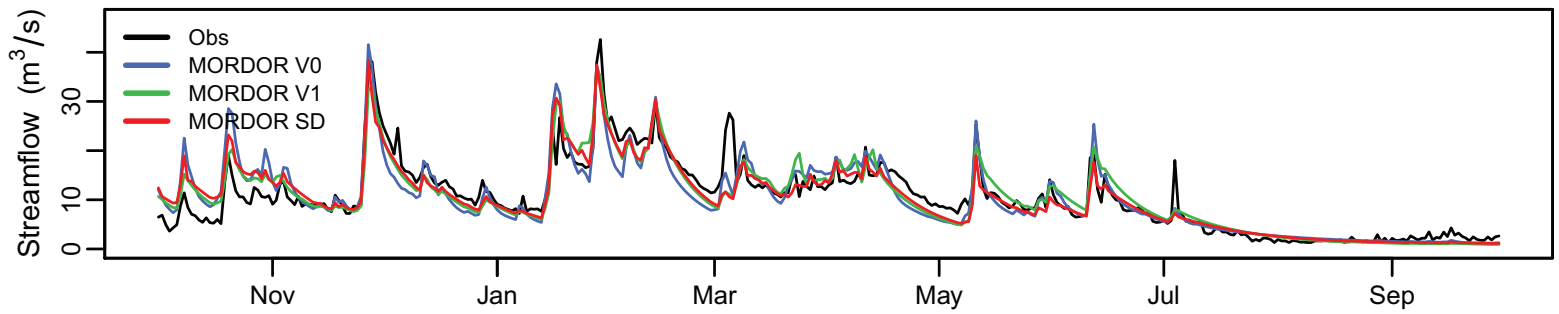

Year 1976

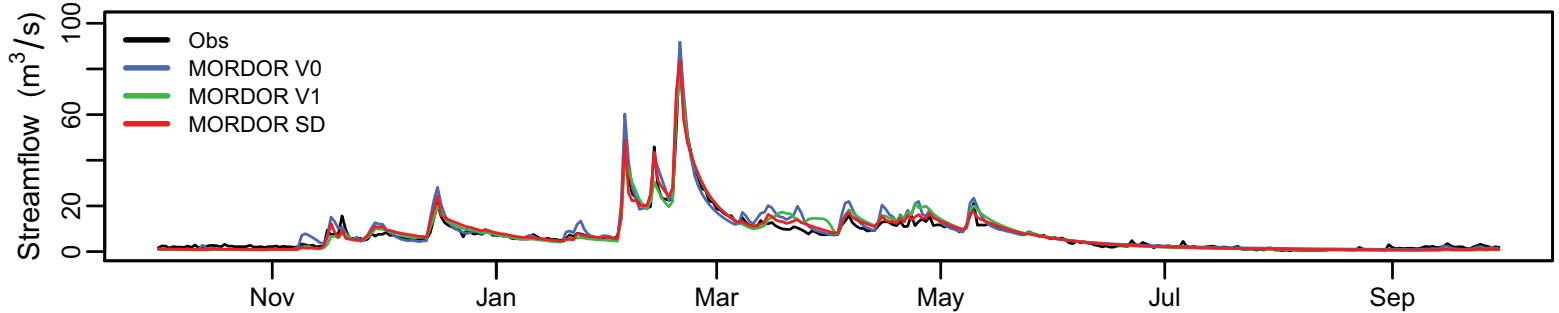

Year 1977

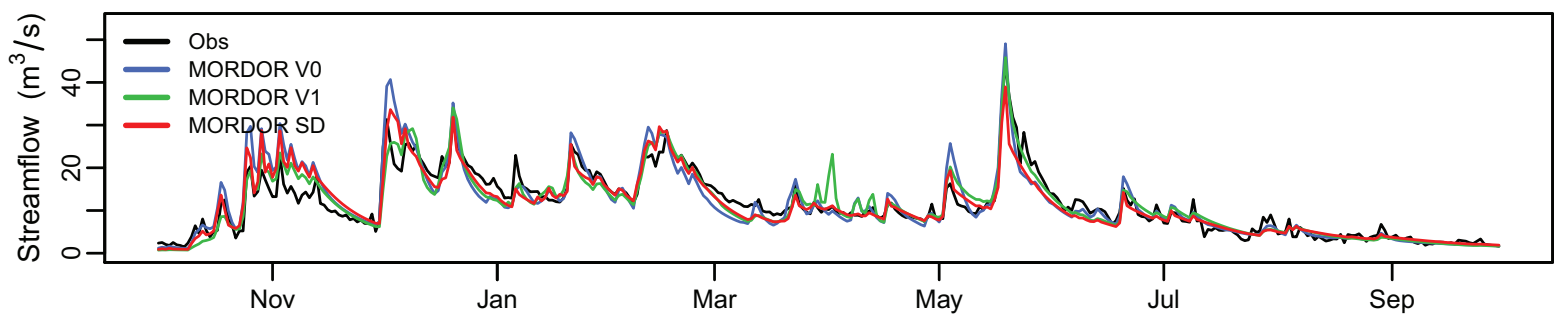

Year 1978

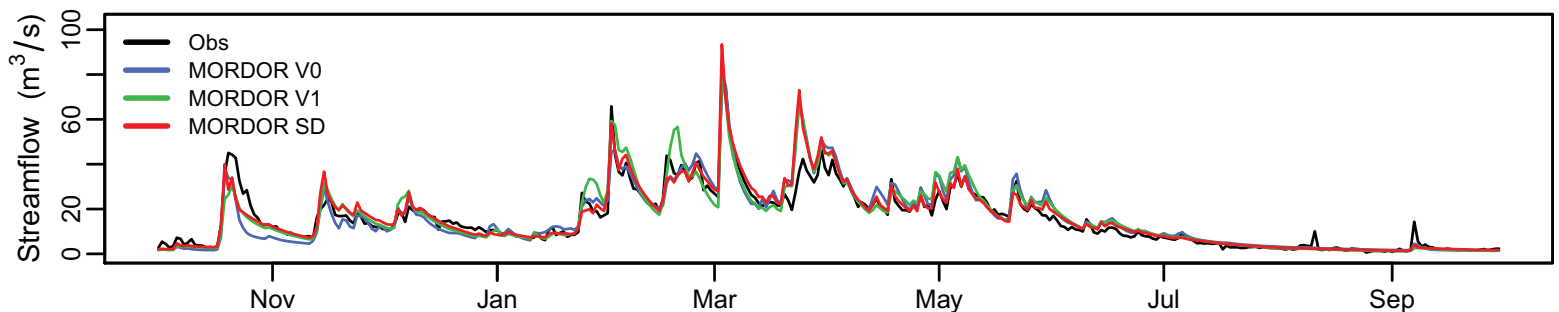

Year 1979

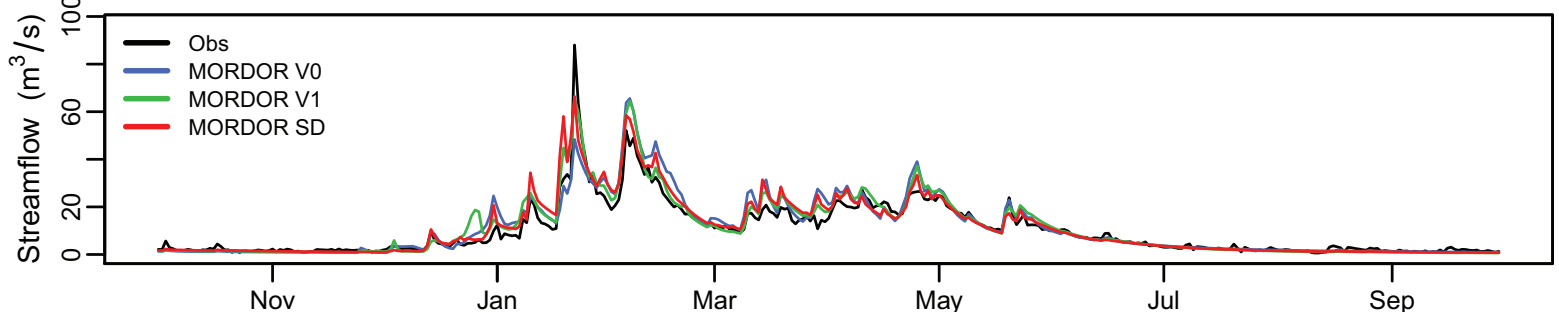



# Agout@LaRaviege

Year 1980

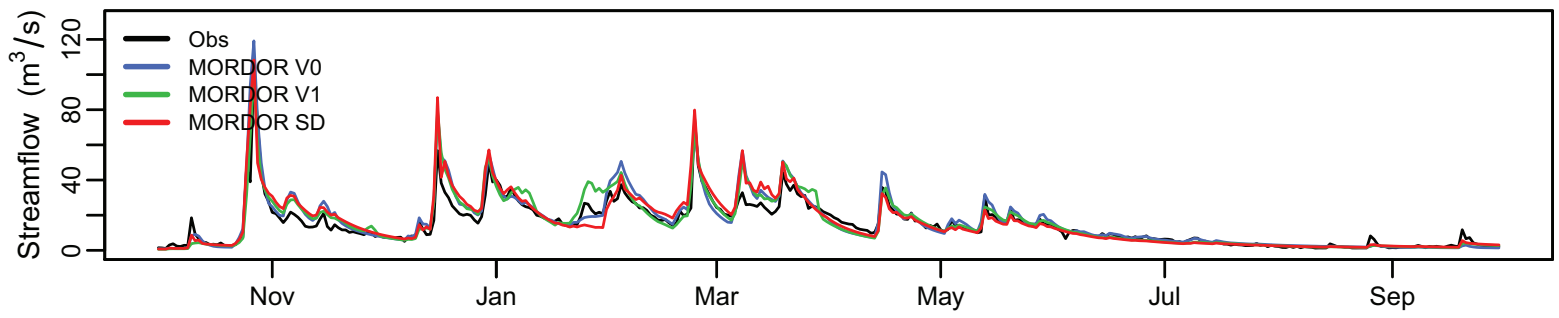

Year 1981

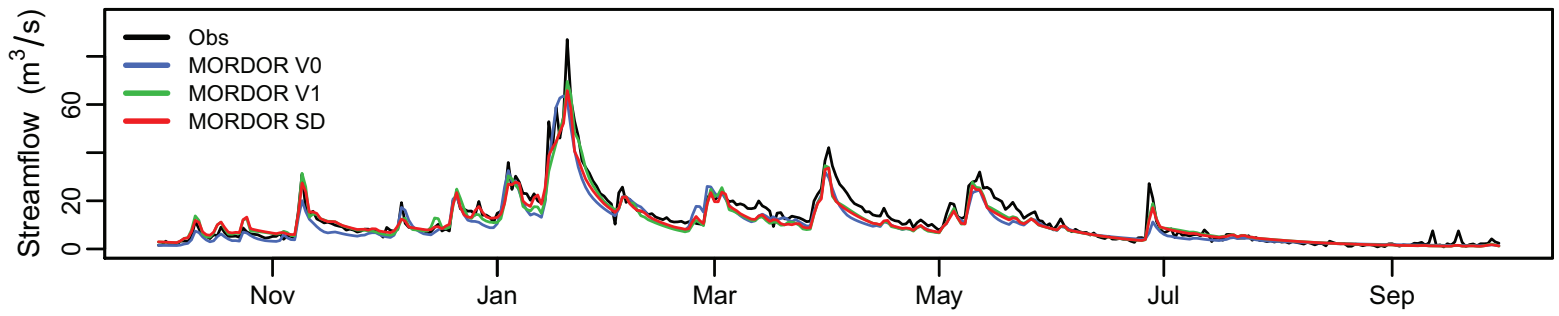

Year 1982

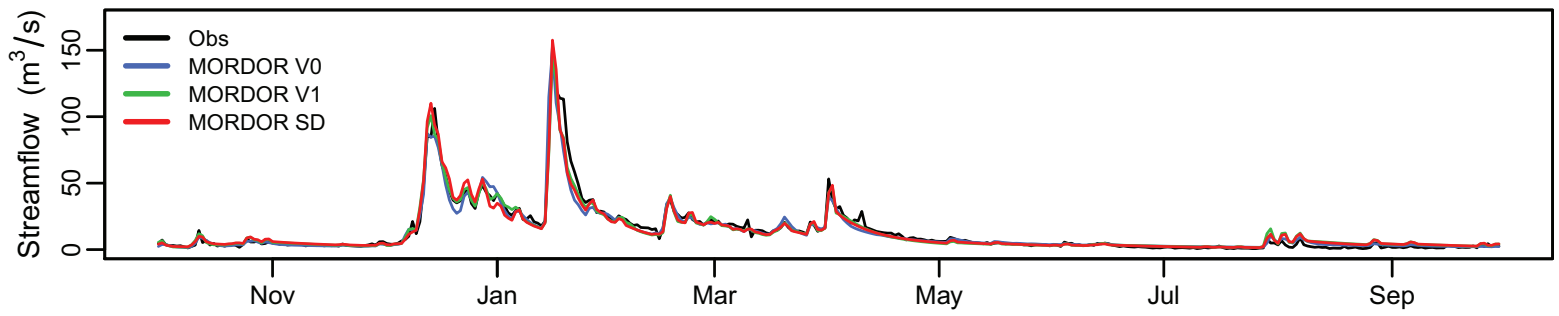

Year 1983

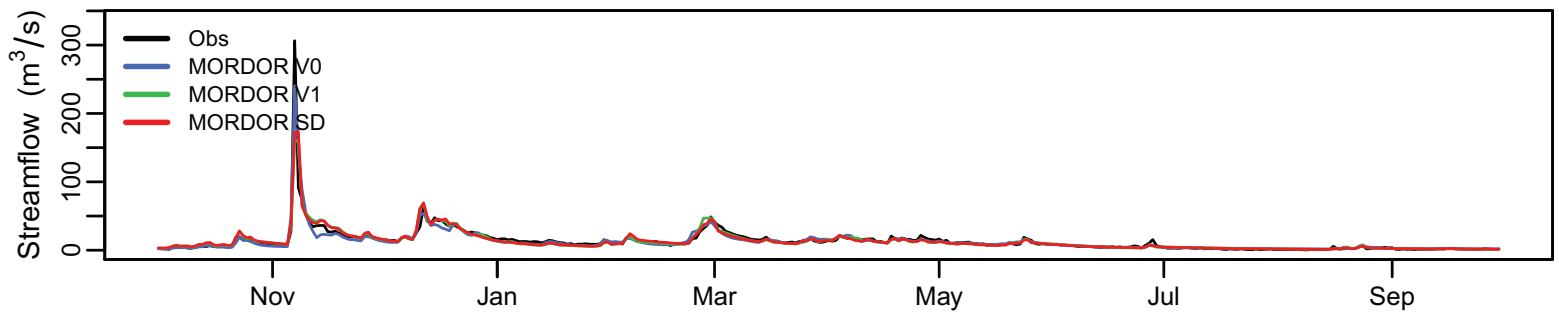

Year 1984

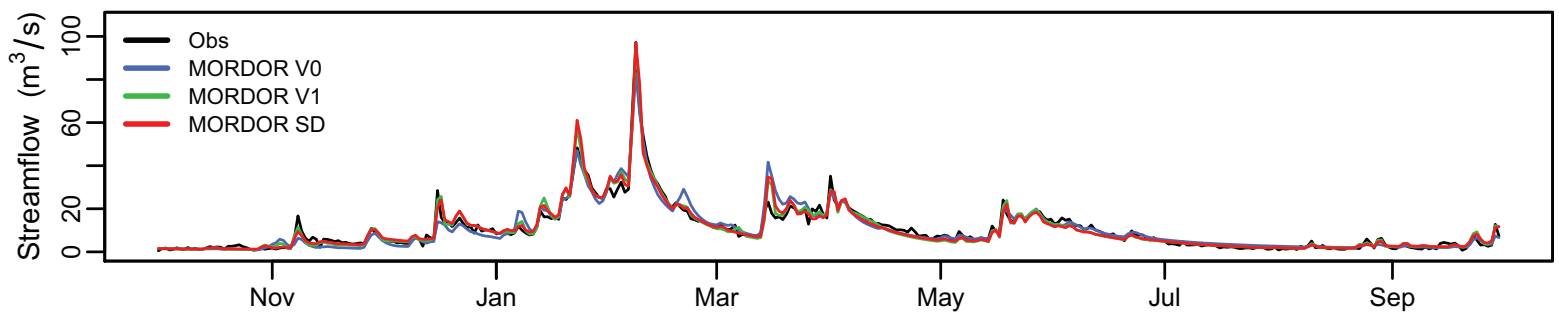

Year 1985

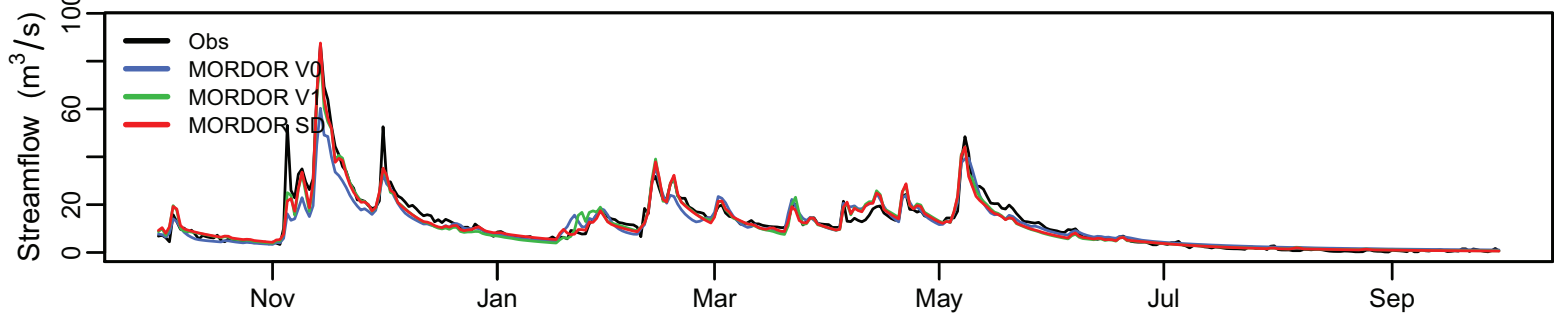

# Agout@LaRaviege

Year 1986

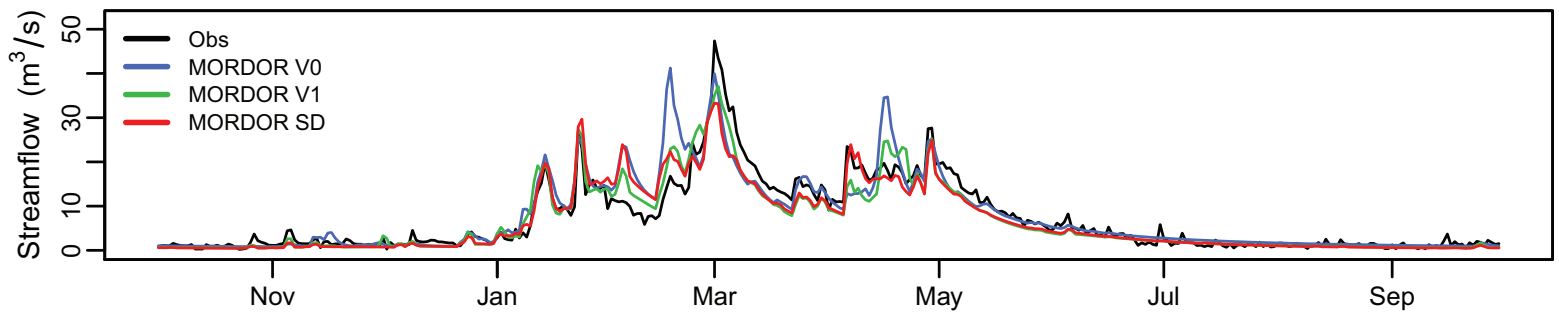

Year 1987

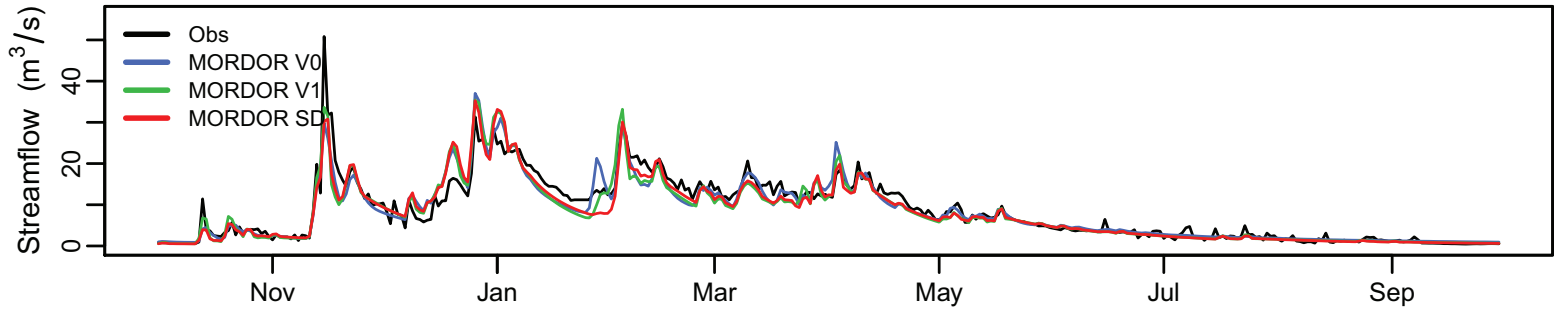

# Allier@Poutes

Year 1989

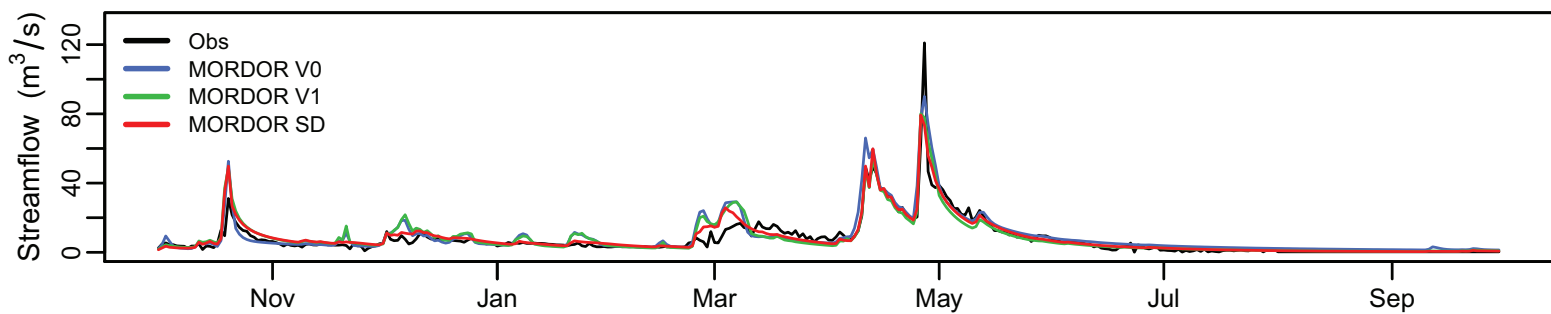

Year 1990

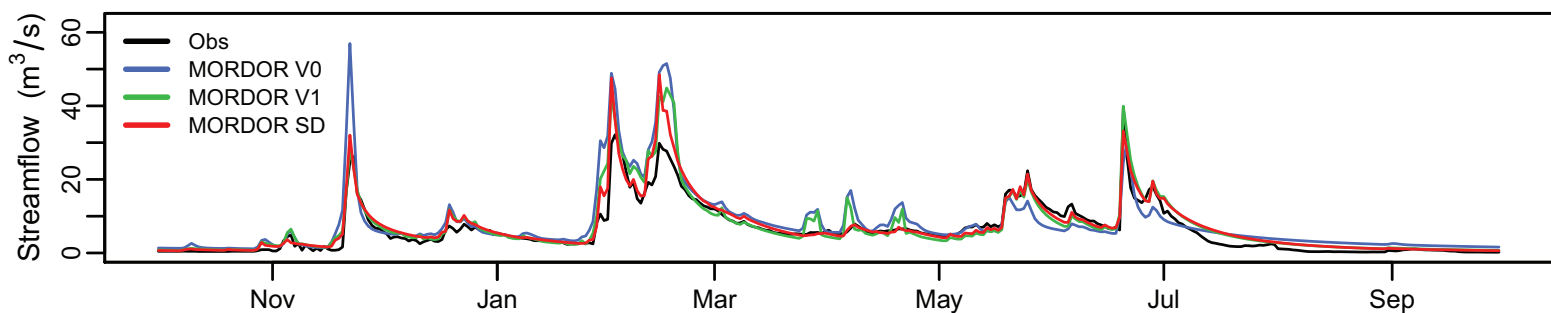

Year 1991

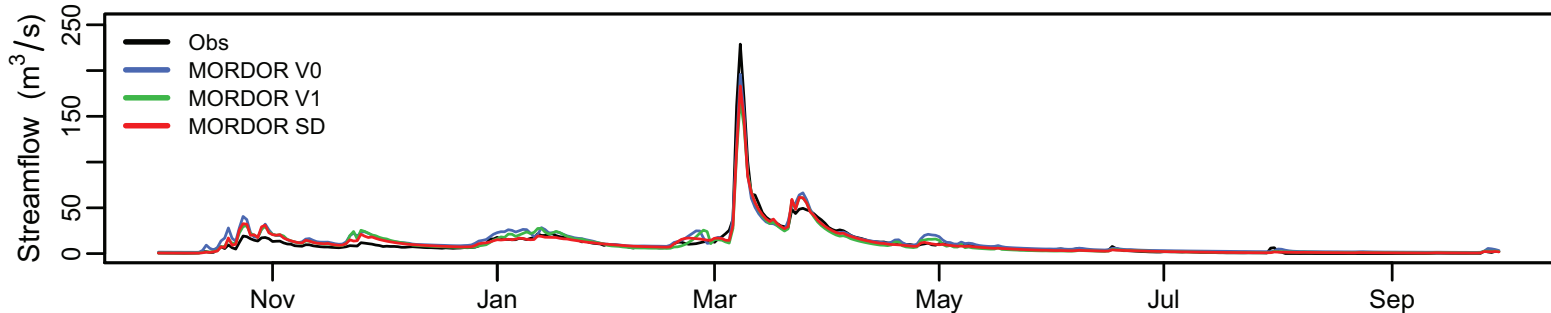

Year 1992

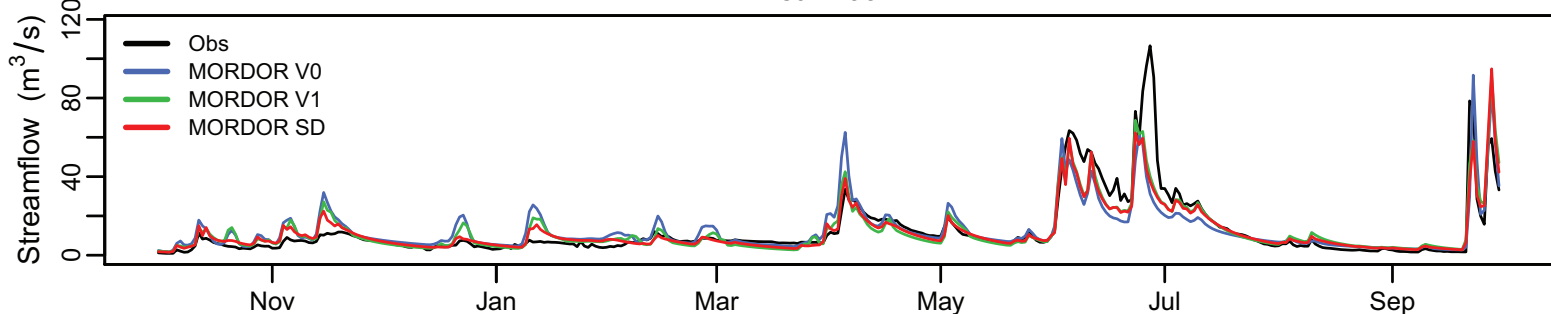

Year 1993

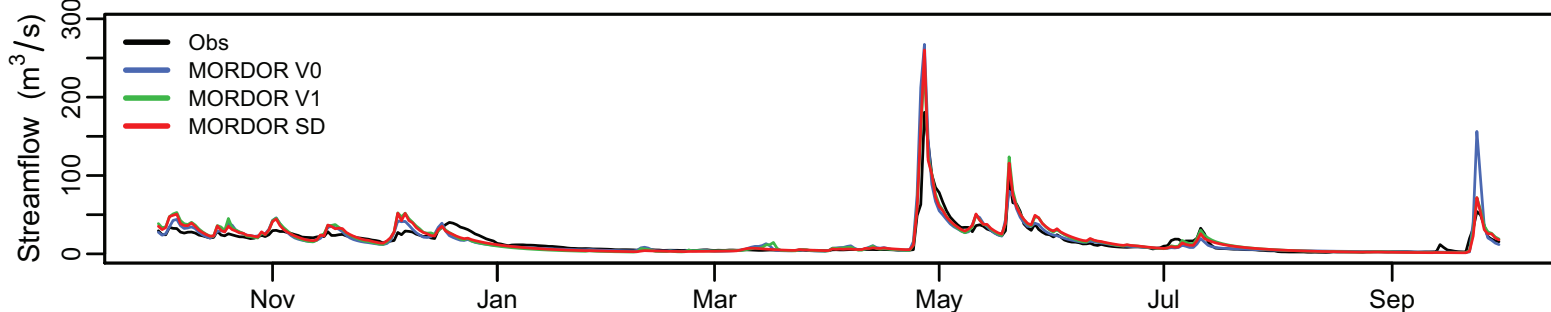

Year 1994

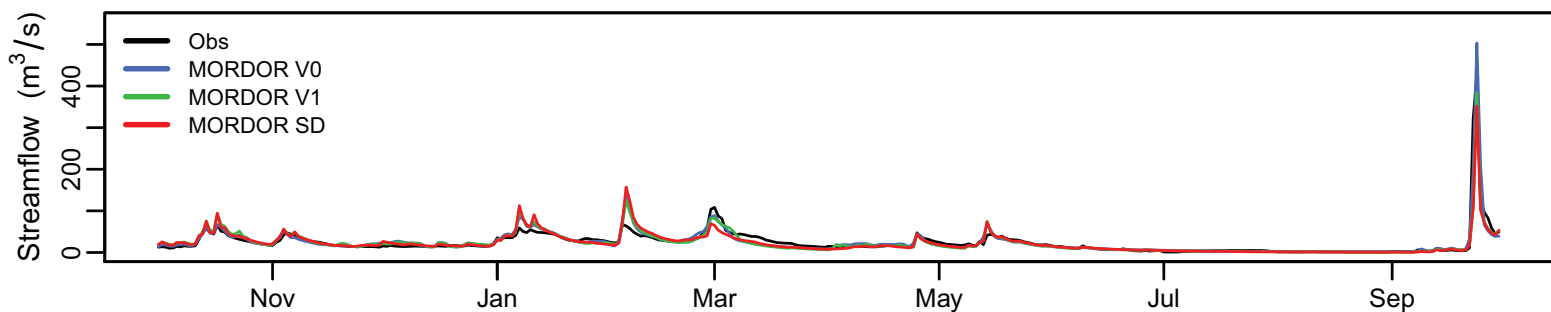

# Allier@Poutes

Year 1995

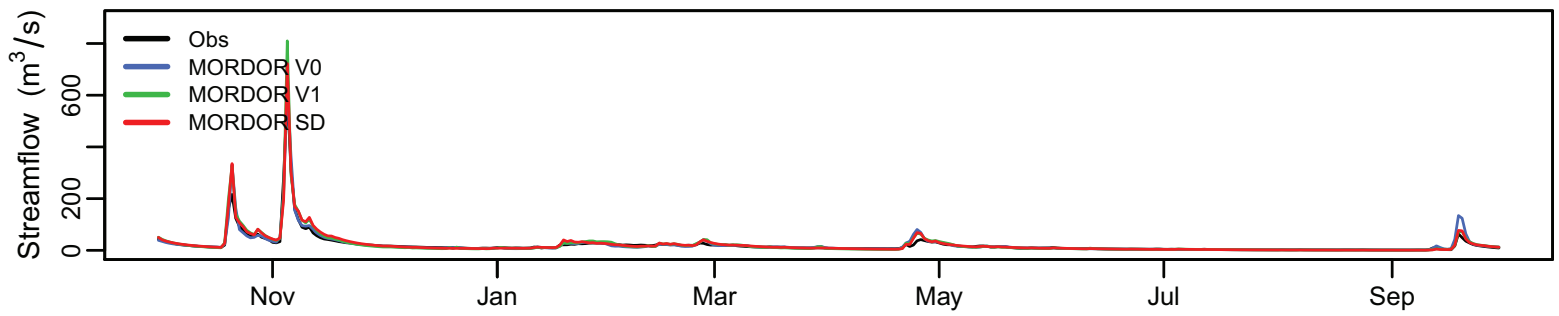

Year 1996

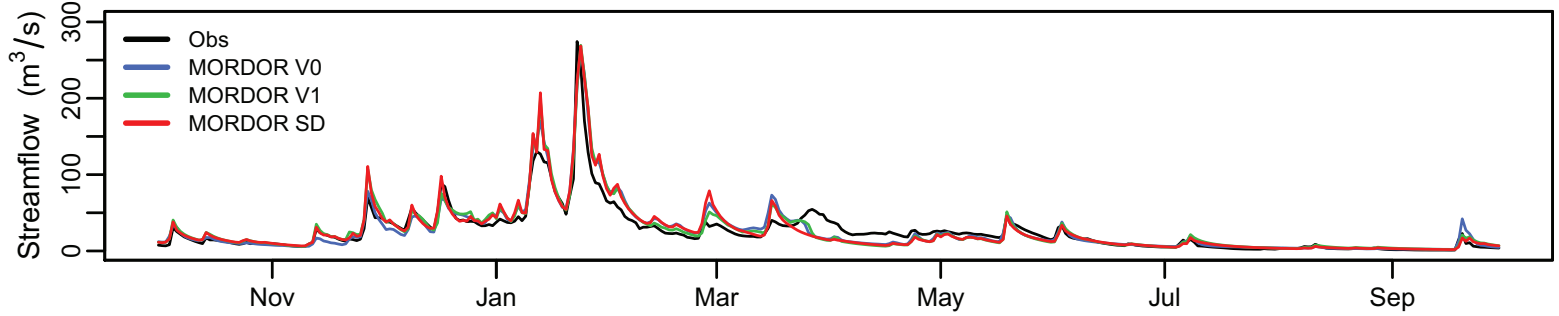

Year 1997

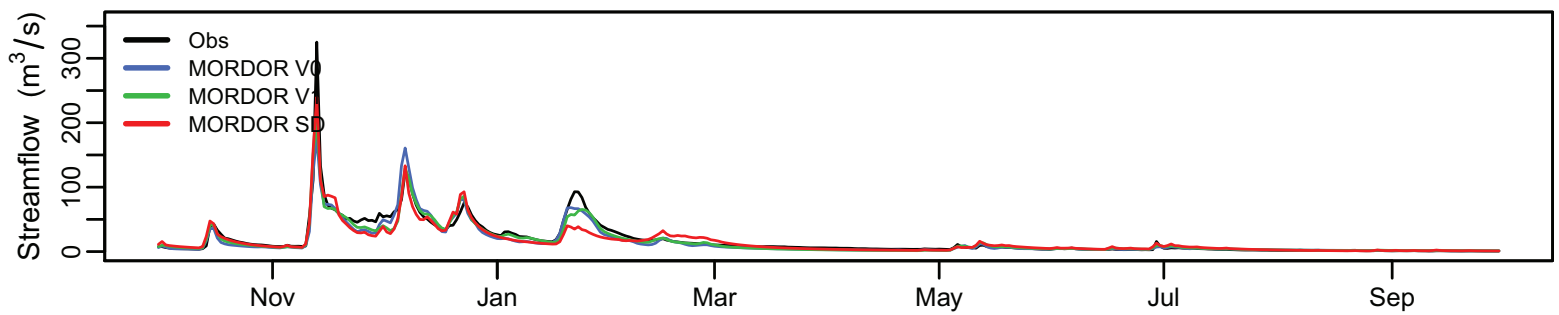

Year 1998

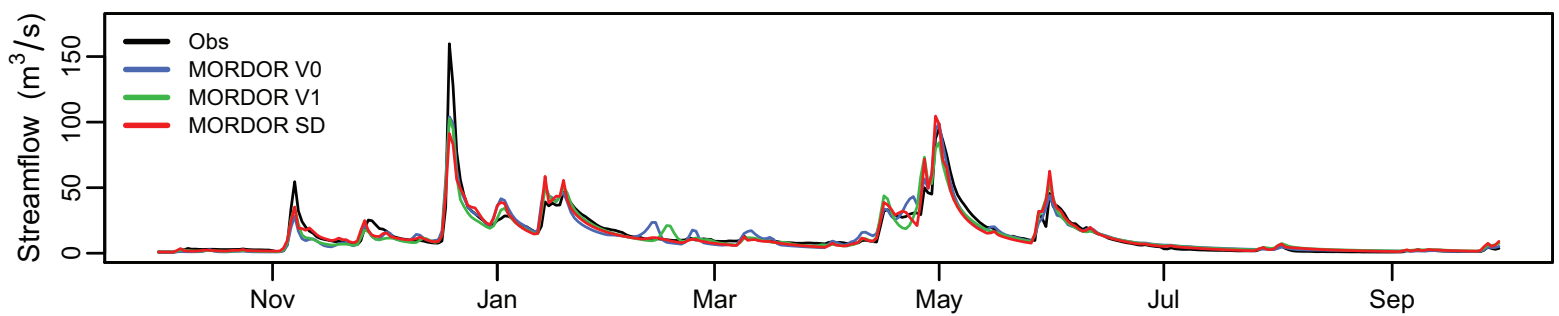

Year 1999

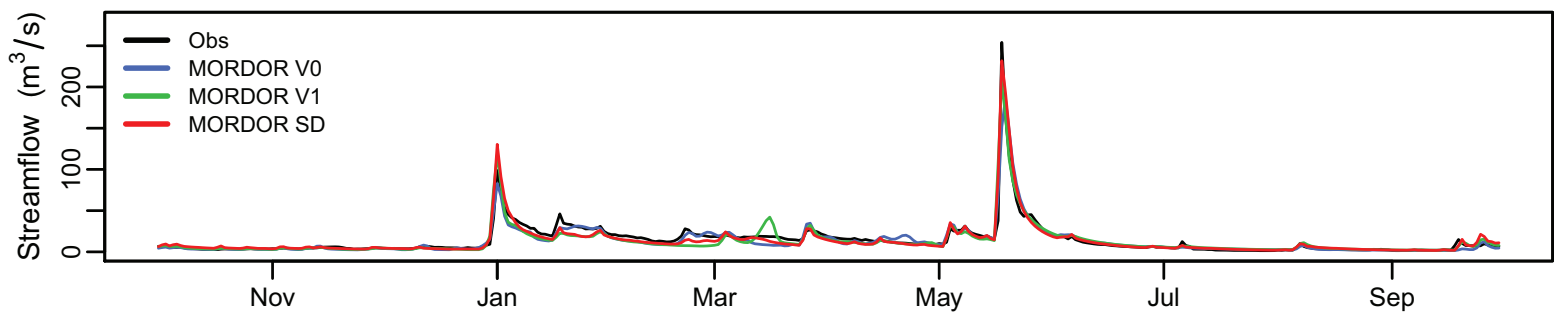

Year 2000

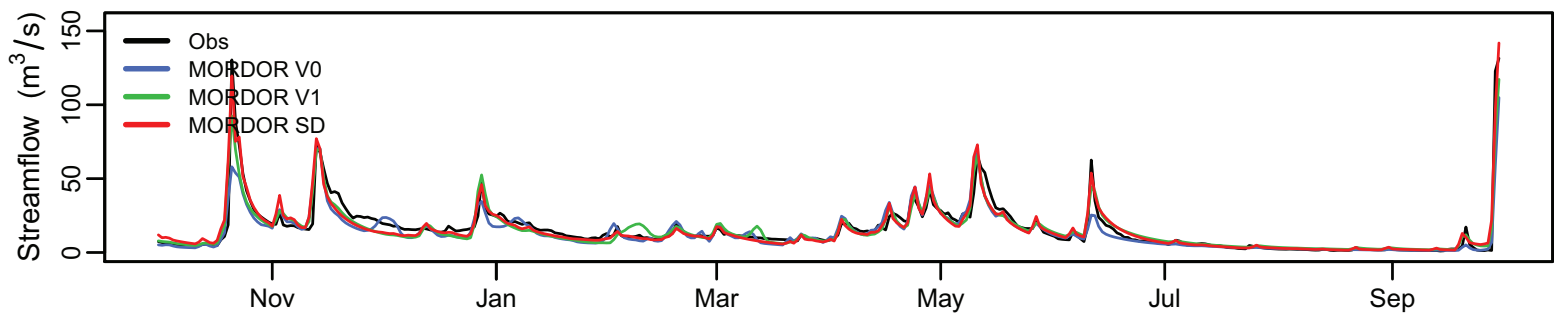

# Allier@Poutes

Year 2001

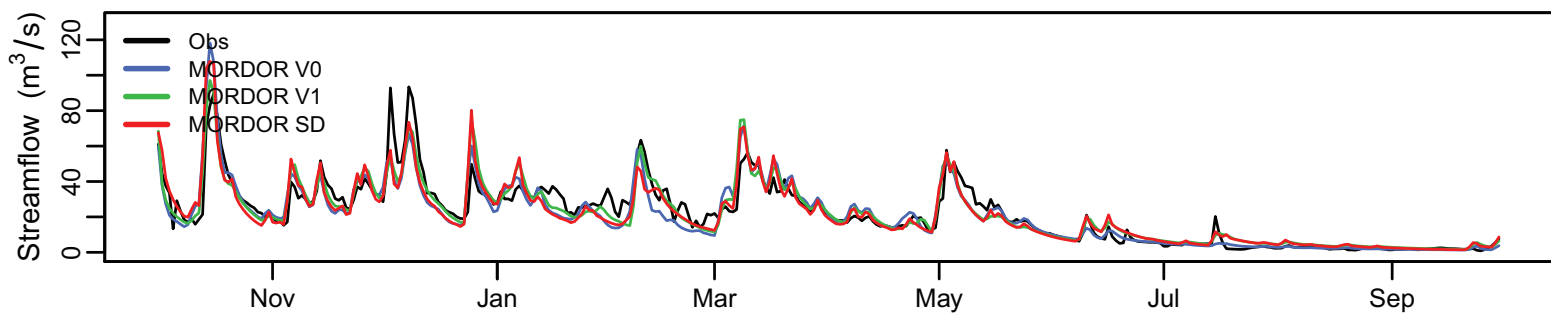

Year 2002

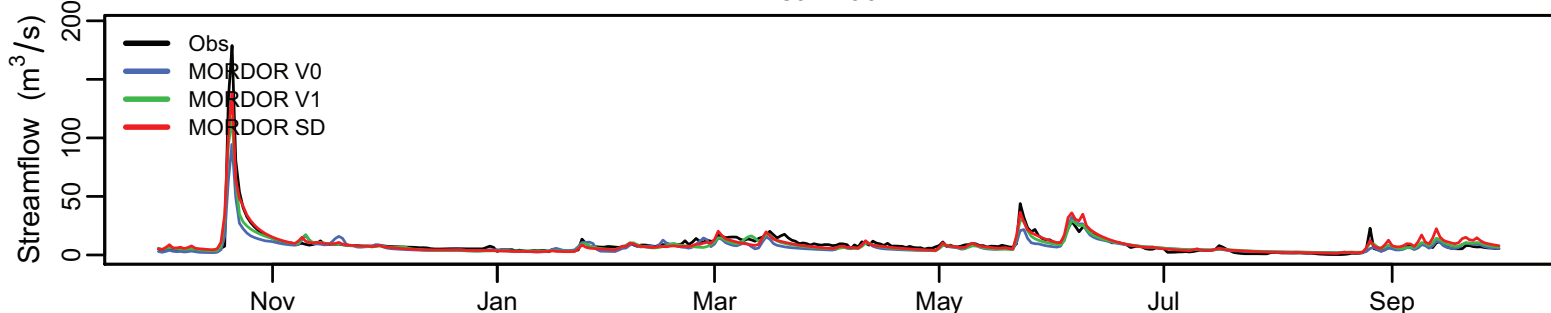

Year 2003

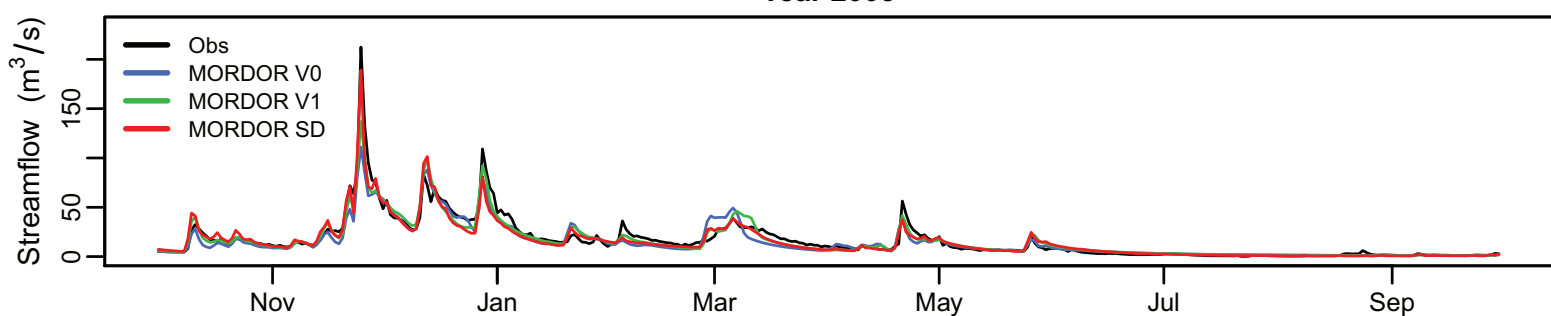

Year 2004

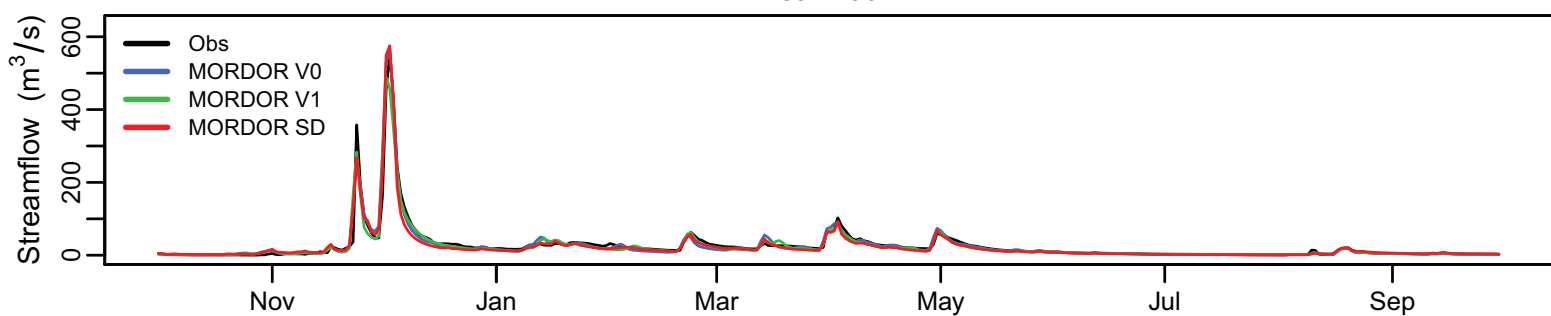

# Ardeche@Sauze

Year 1962

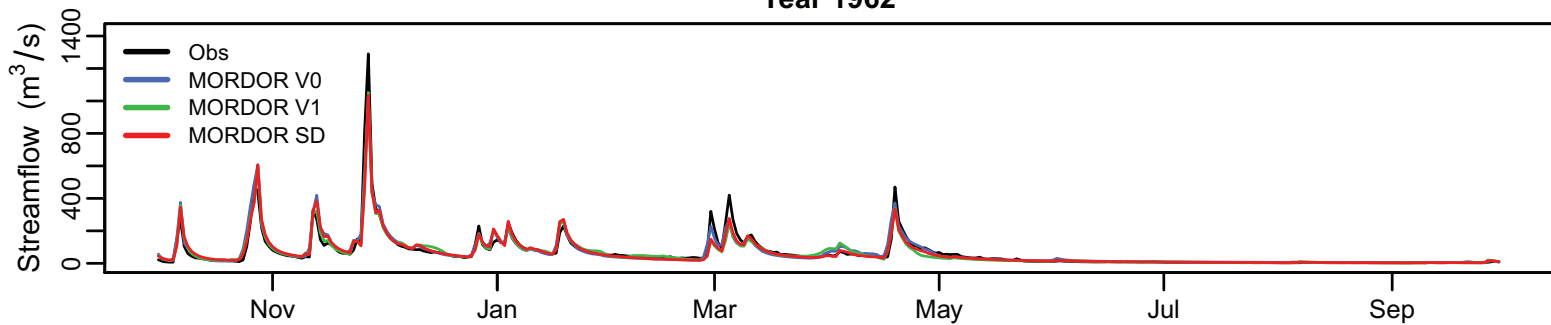

Year 1963

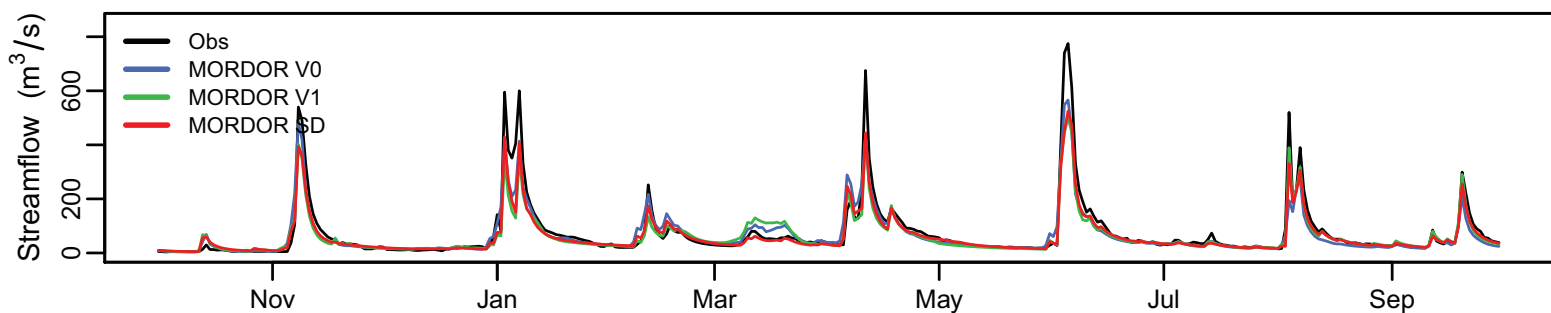

Year 1964

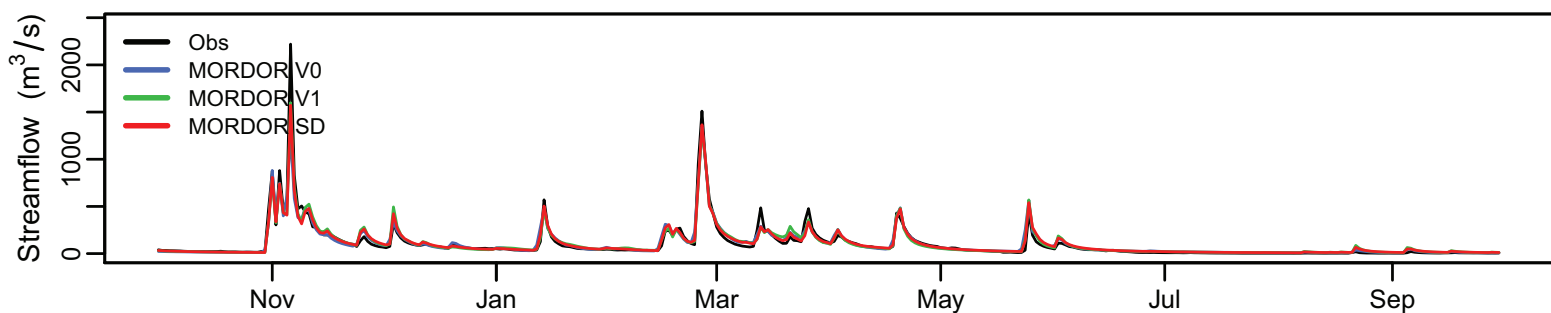

Year 1965

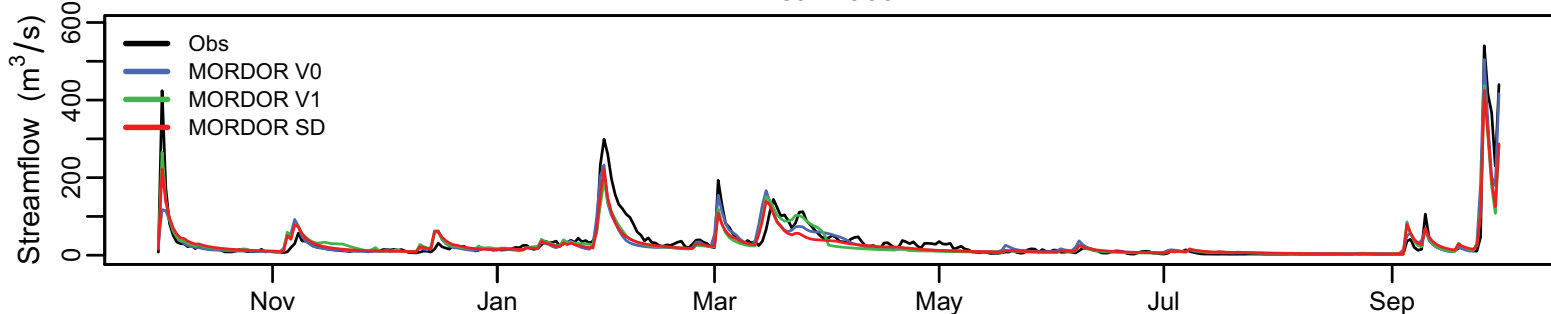

Year 1966

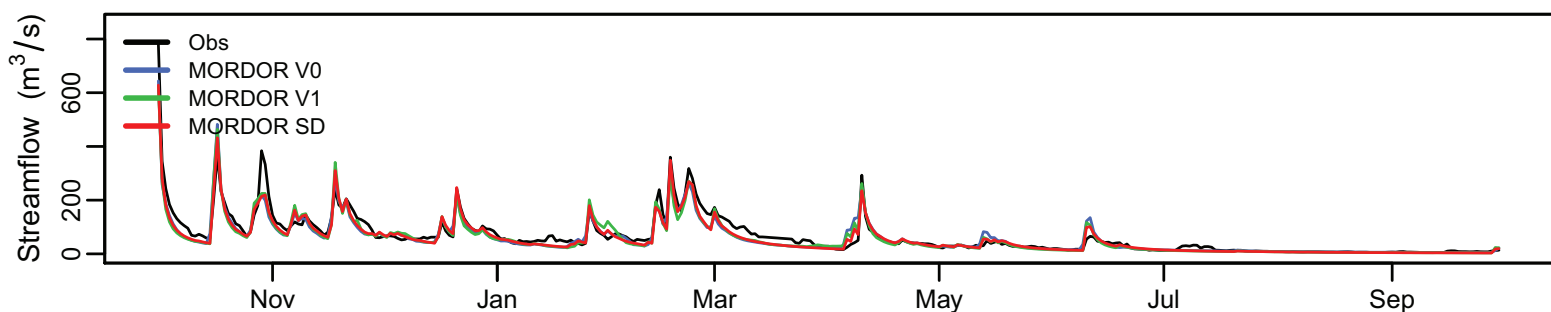

Year 1967

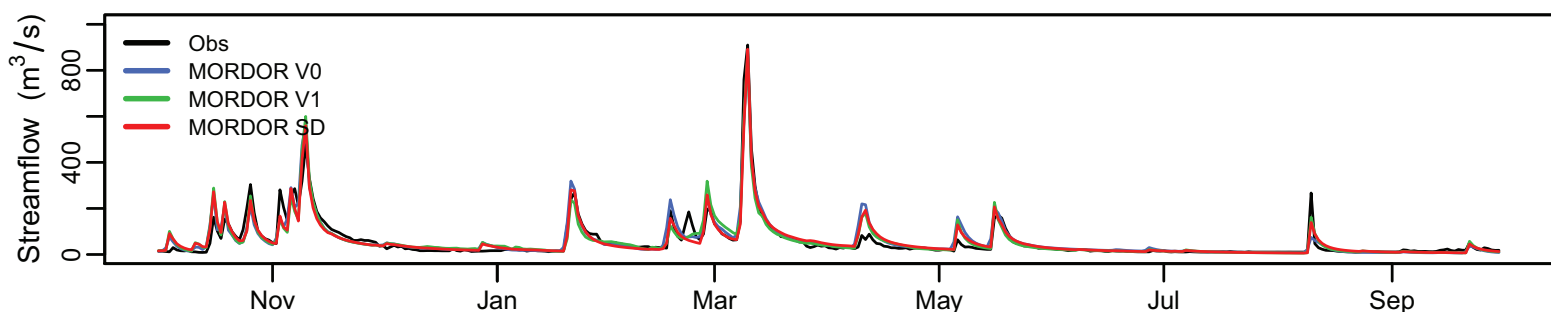

# Ardeche@Sauze

Year 1968

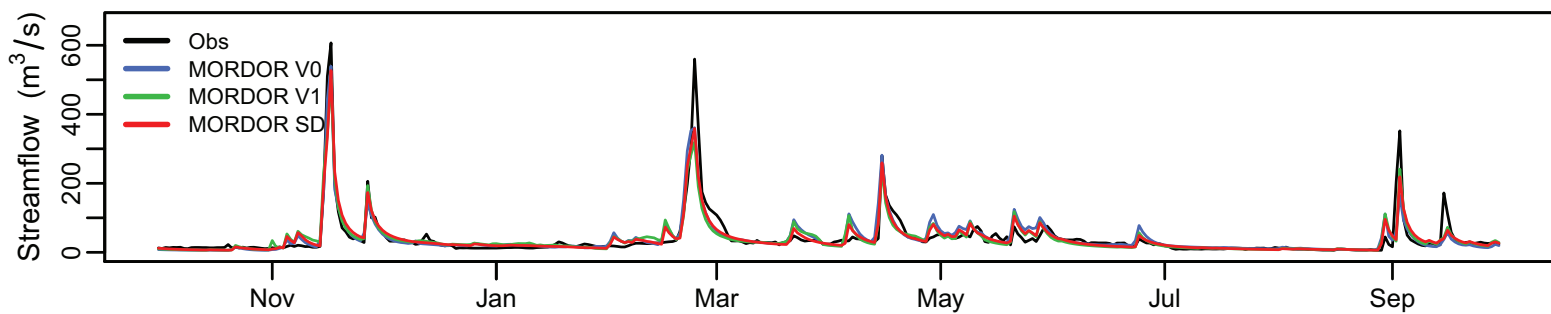

Year 1969

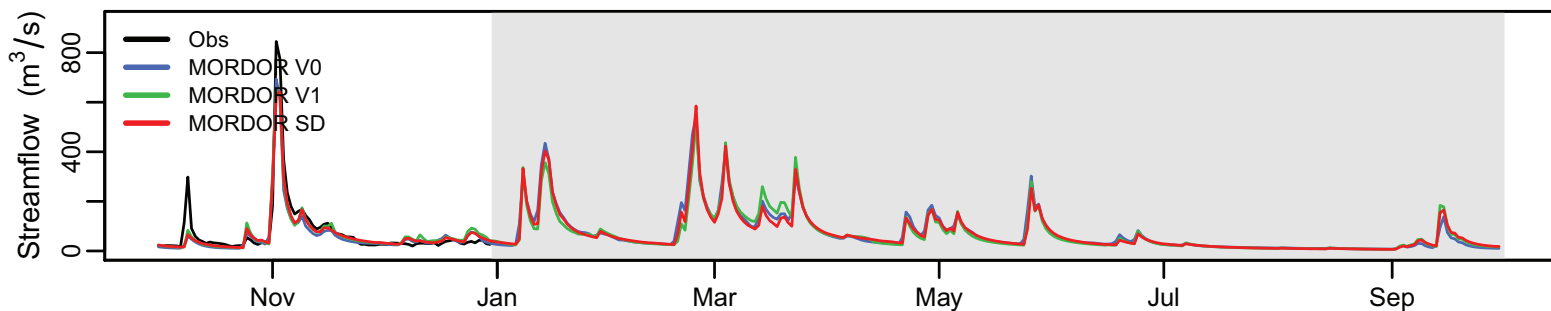

Year 1970

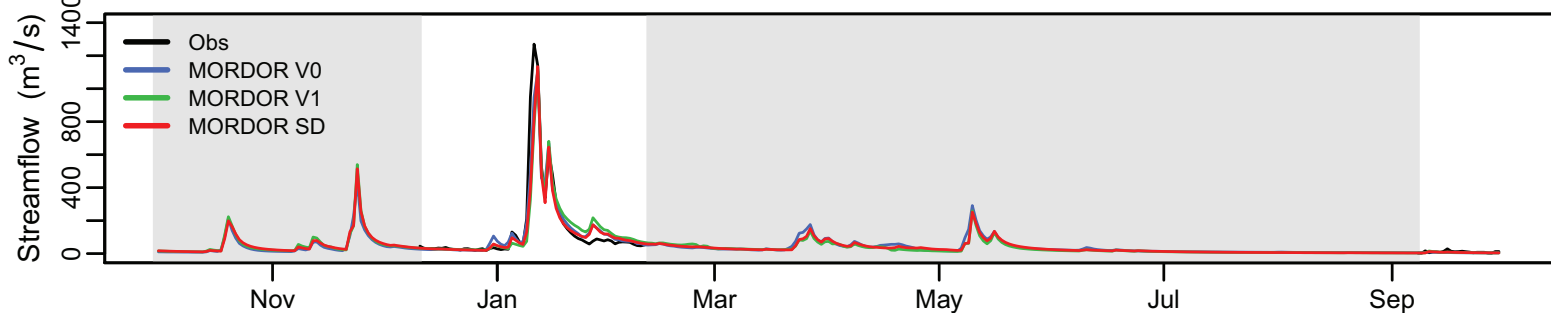

Year 1971

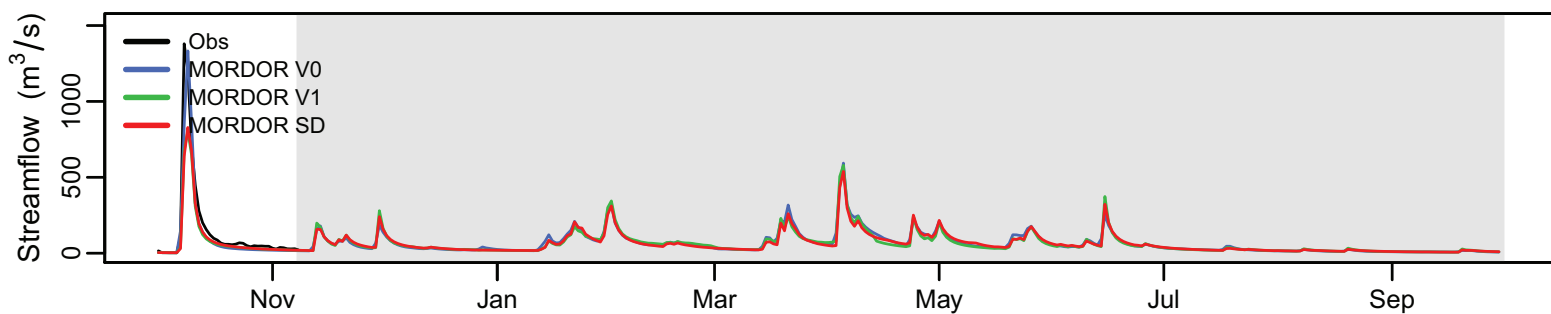

Year 1972

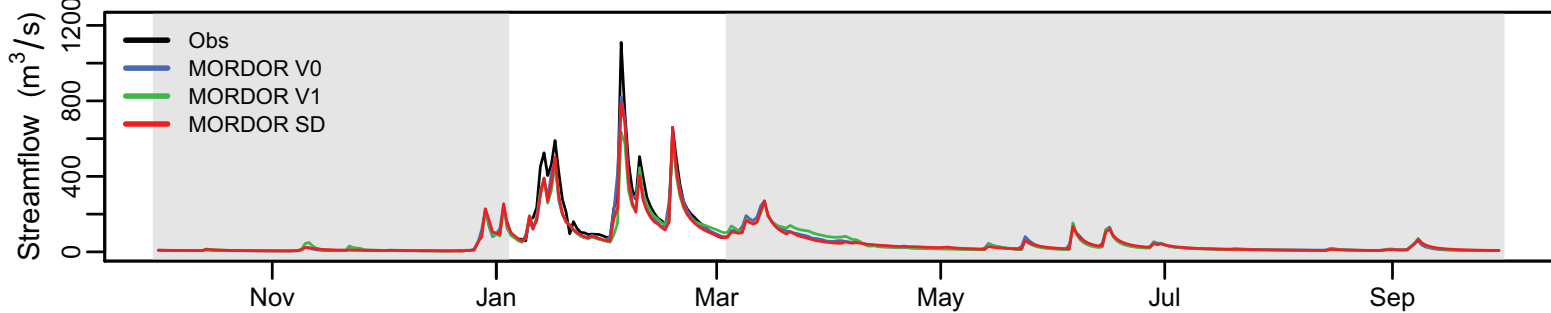

Year 1973

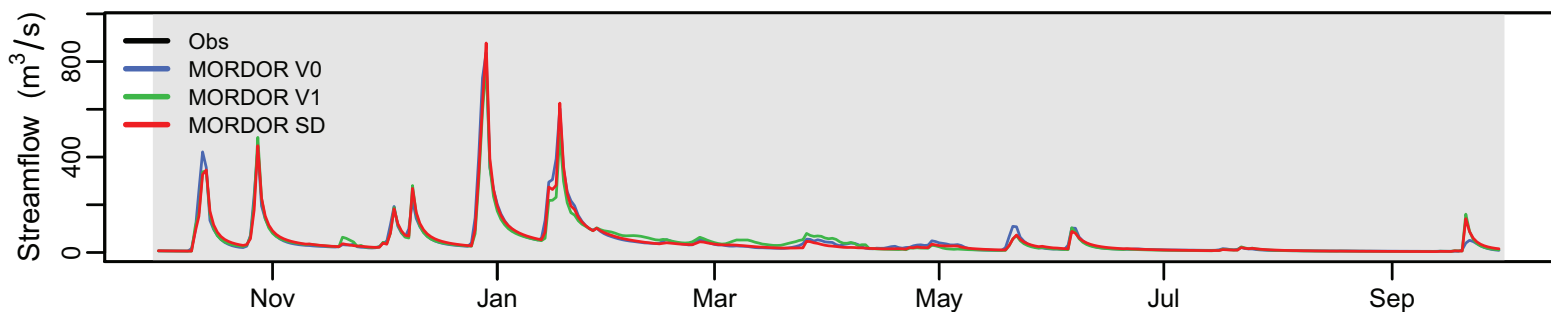

# Ardeche@Sauze

Year 1974

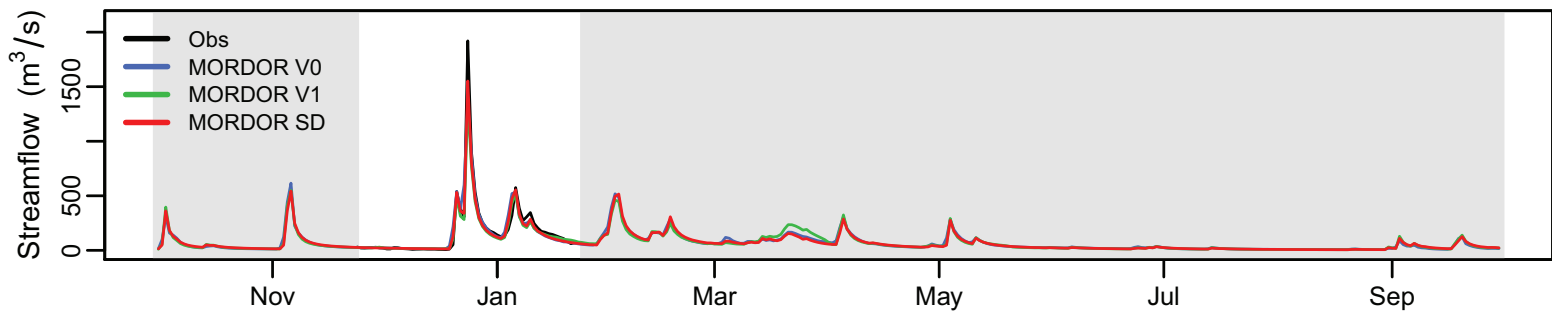

Year 1975

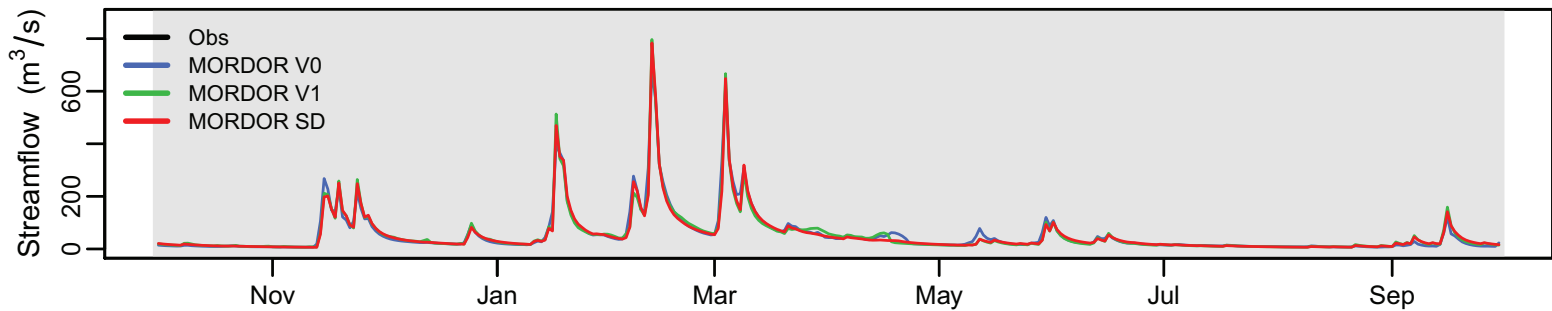

Year 1976

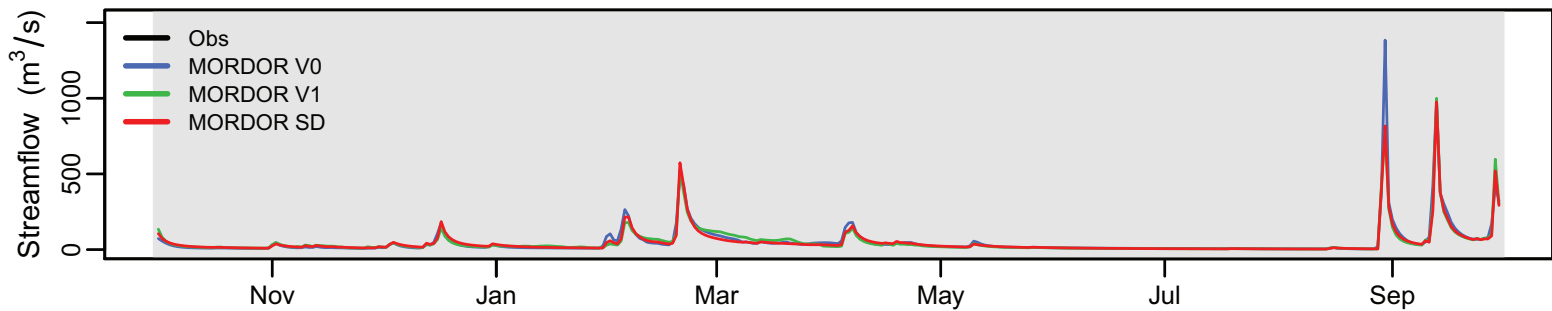

Year 1977

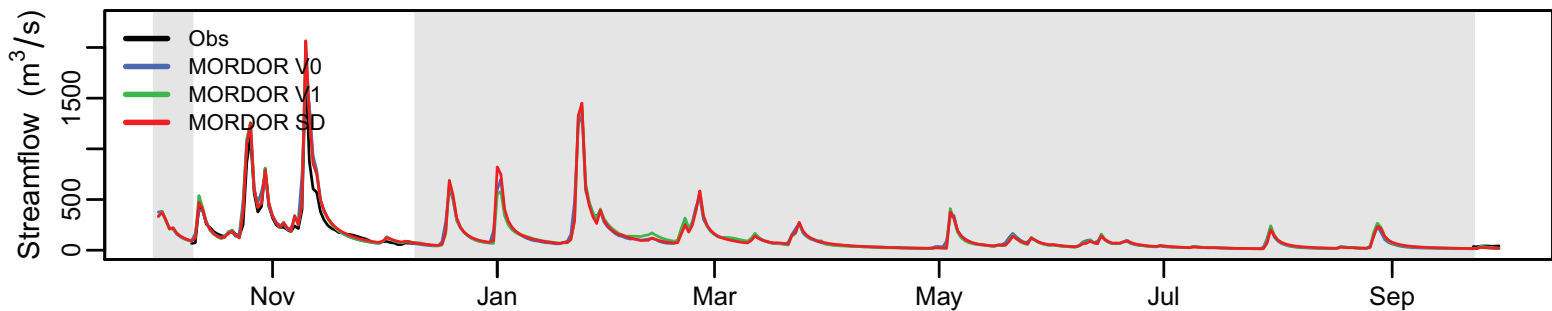

Year 1978

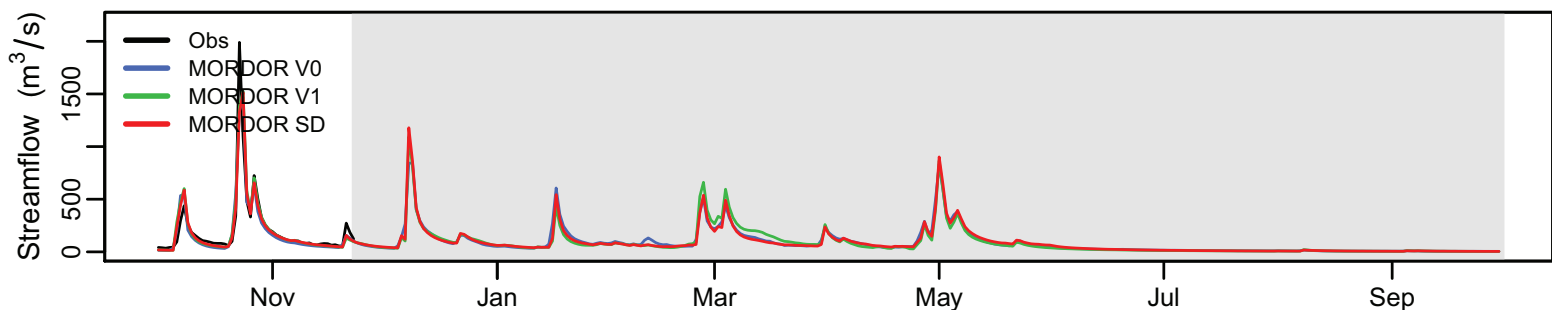

Year 1979

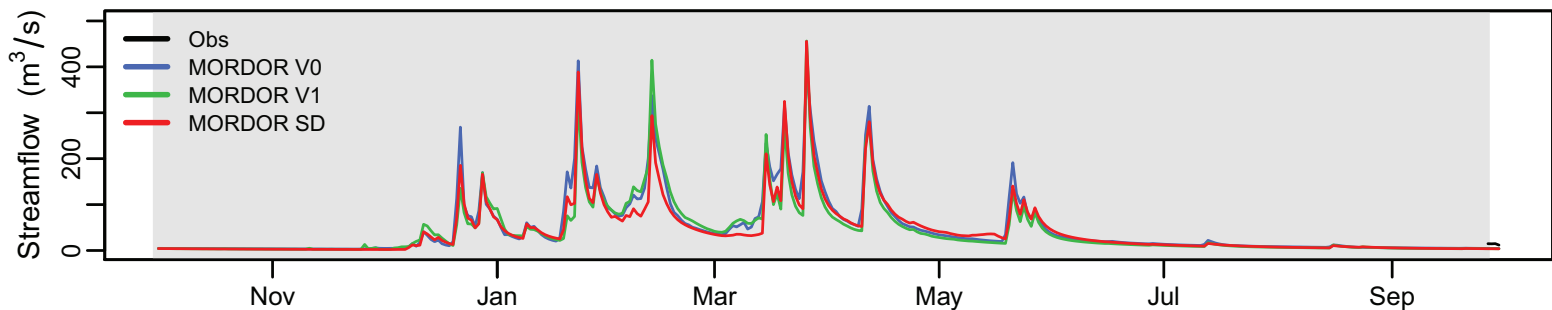



# Ardeche@Sauze

Year 1980

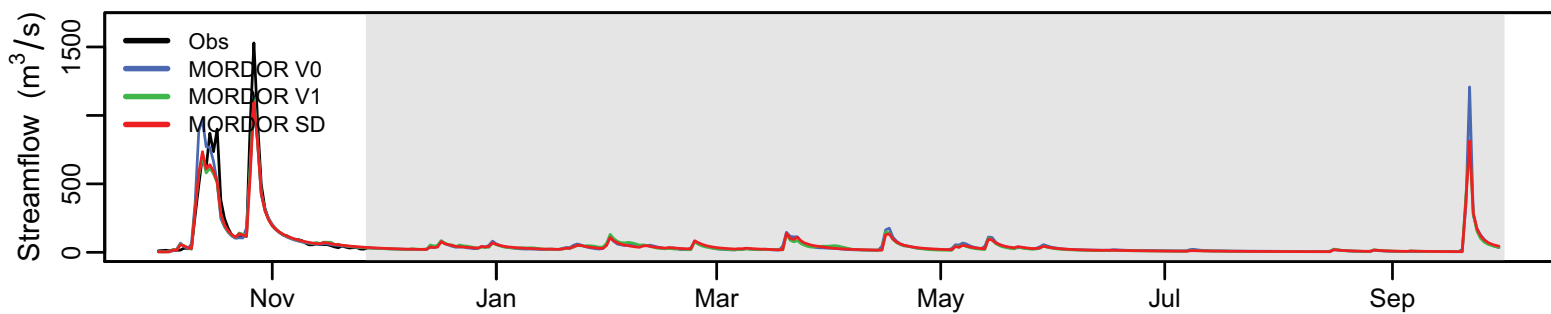

Year 1981

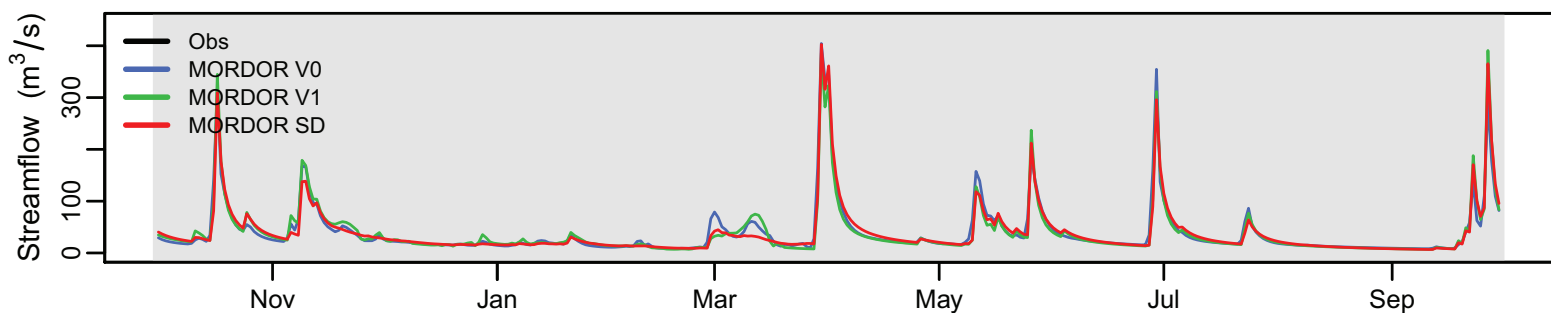

Year 1982

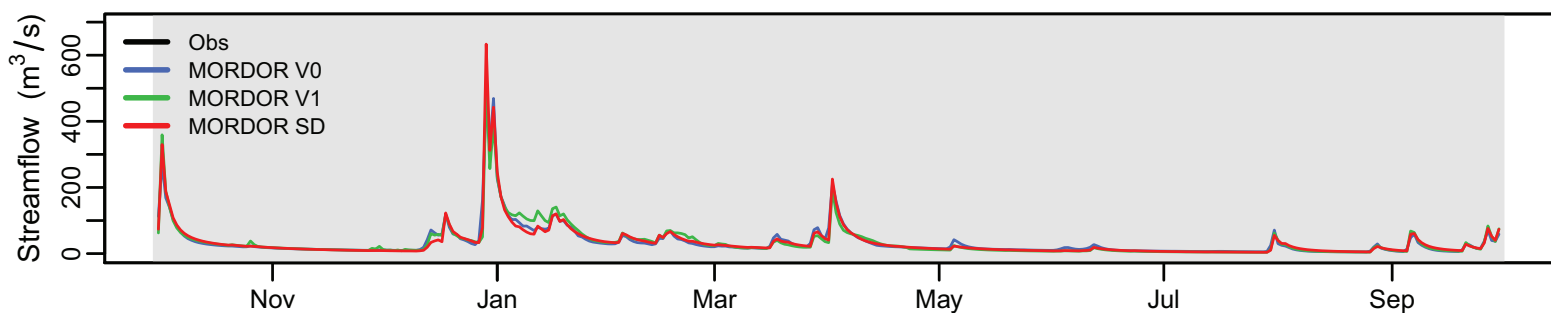

Year 1983

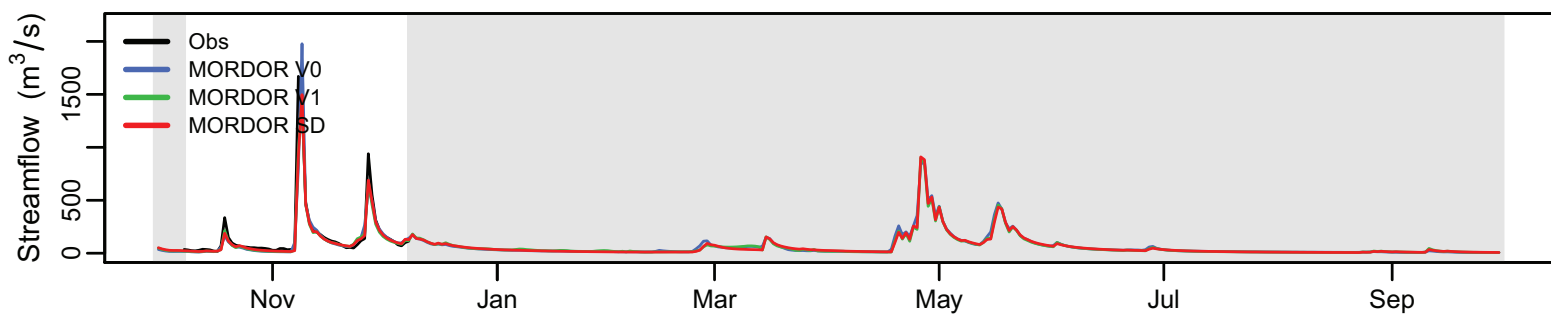

Year 1984

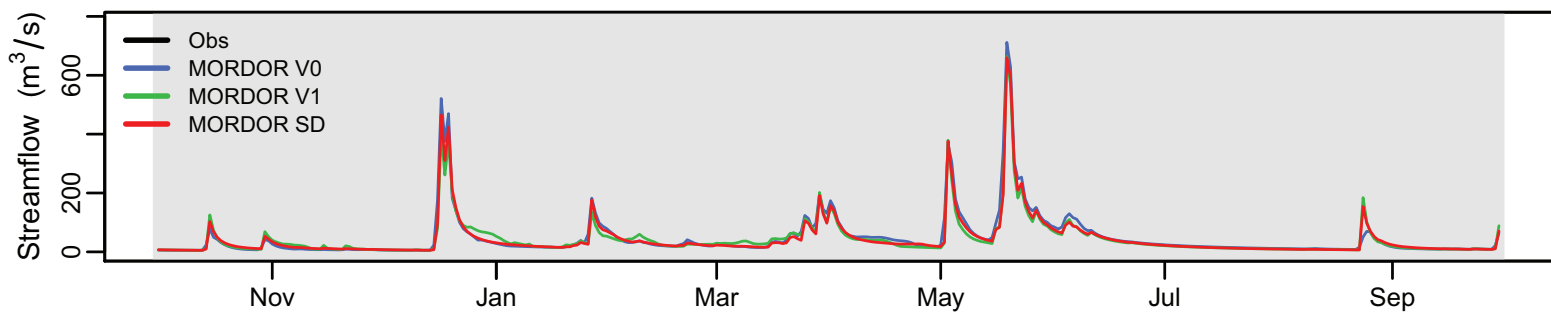

Year 1985

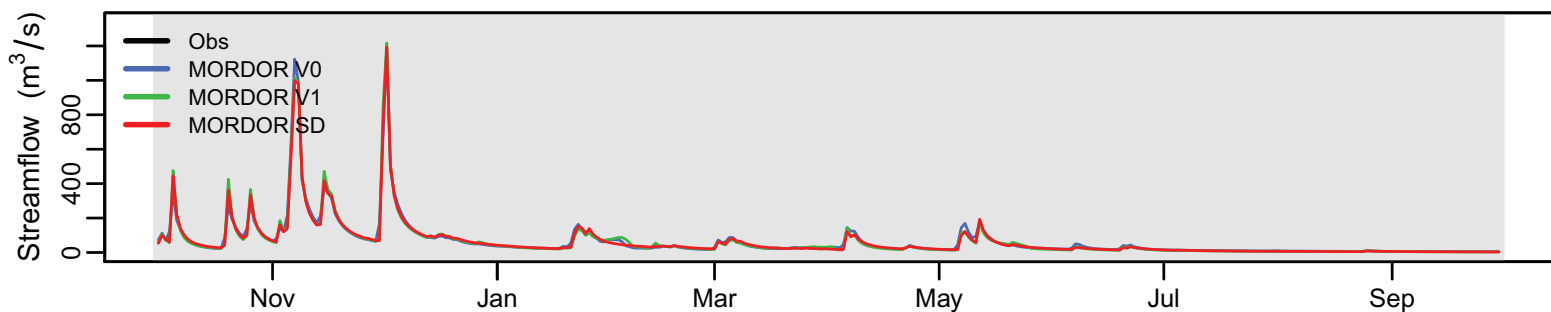

# Ardeche@Sauze

Year 1986

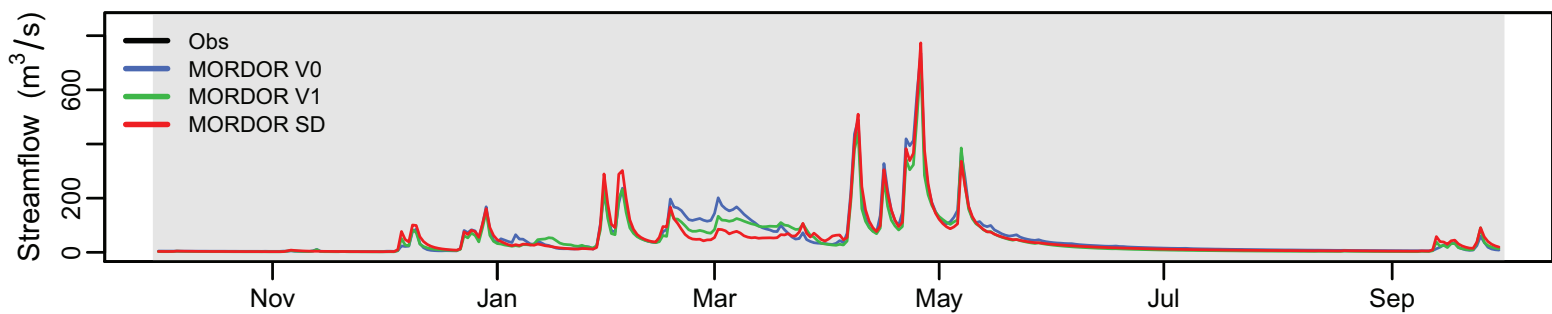

Year 1987

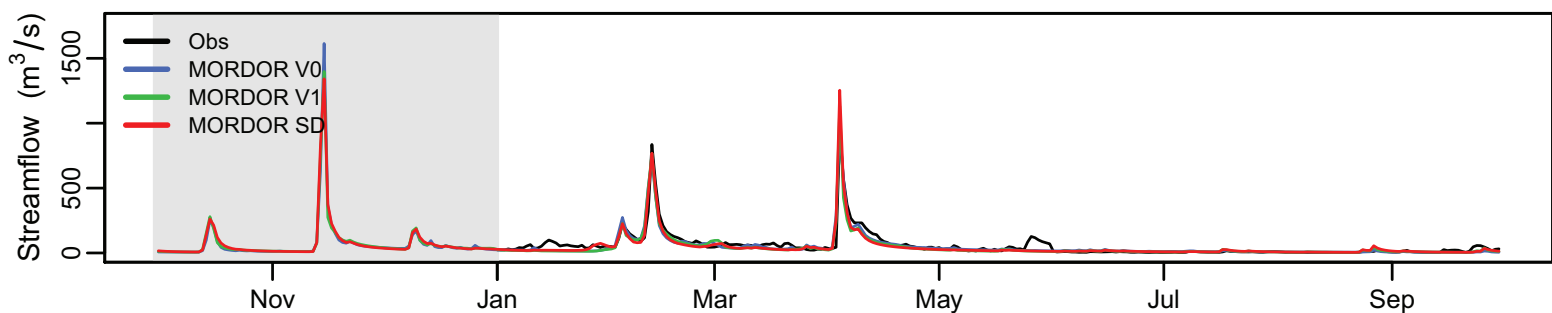

Year 1988

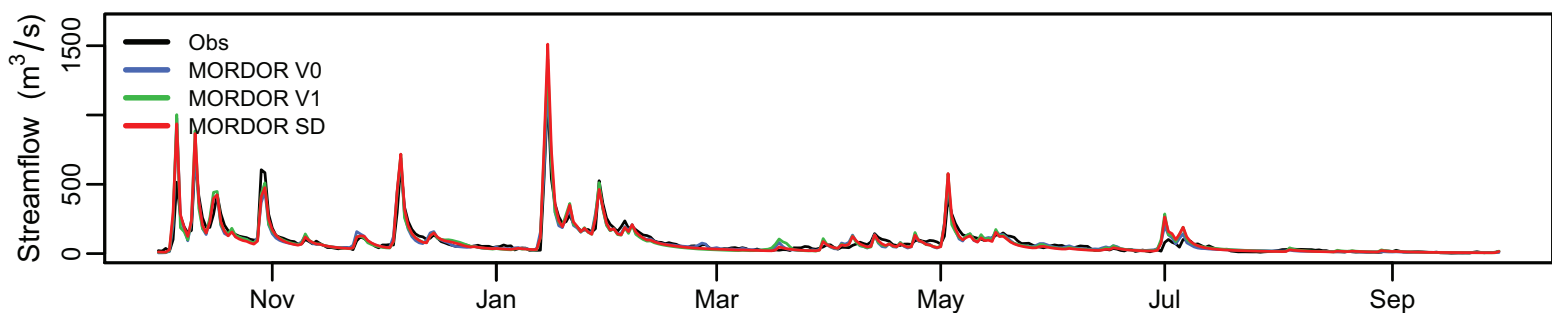

Year 1989

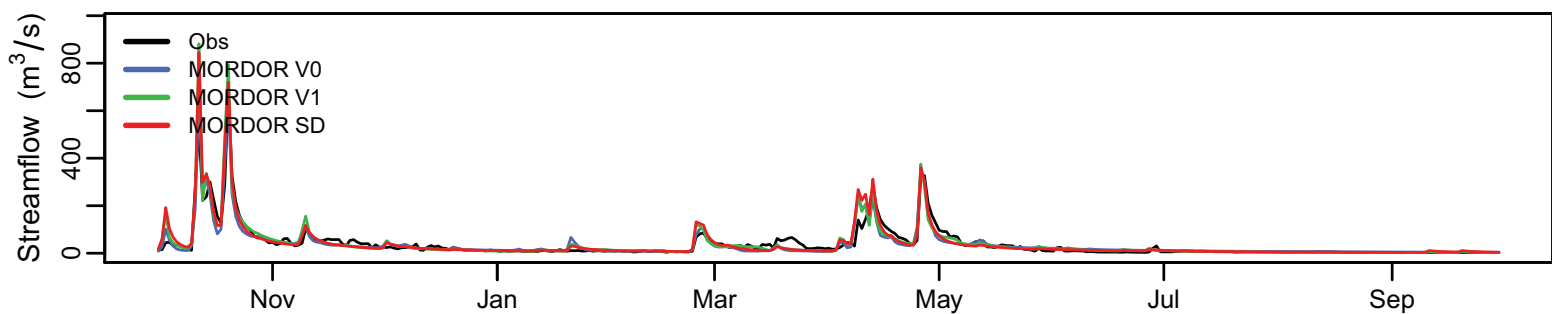

Year 1990

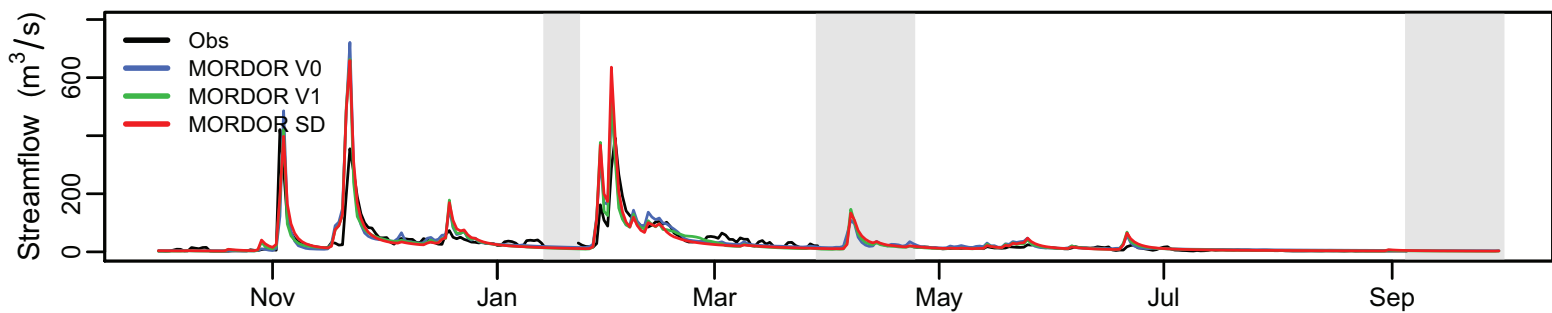

Year 1991

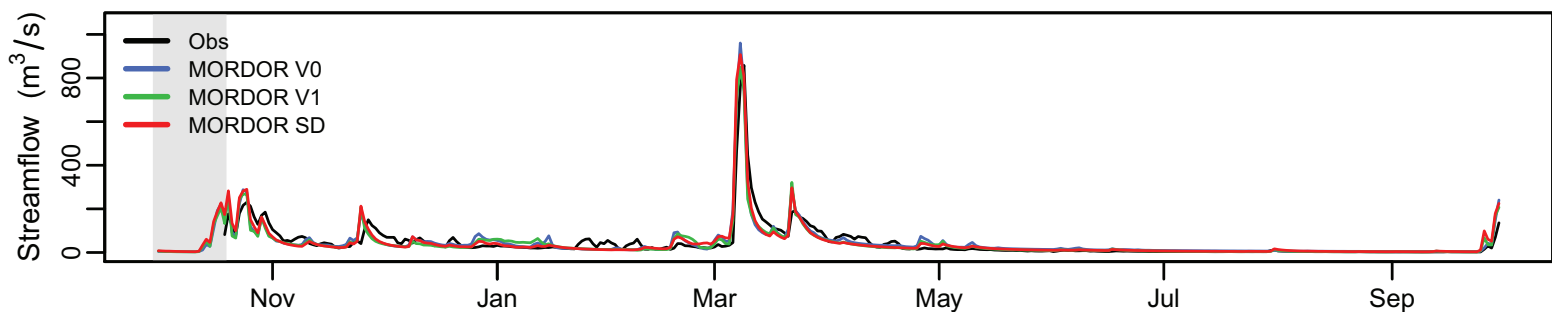

# Ardeche@Sauze

Year 1992

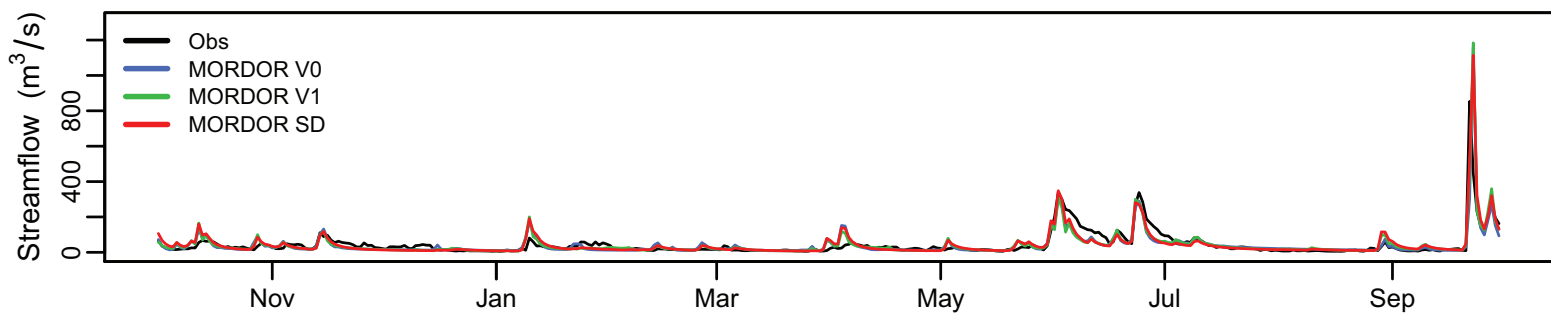

Year 1993

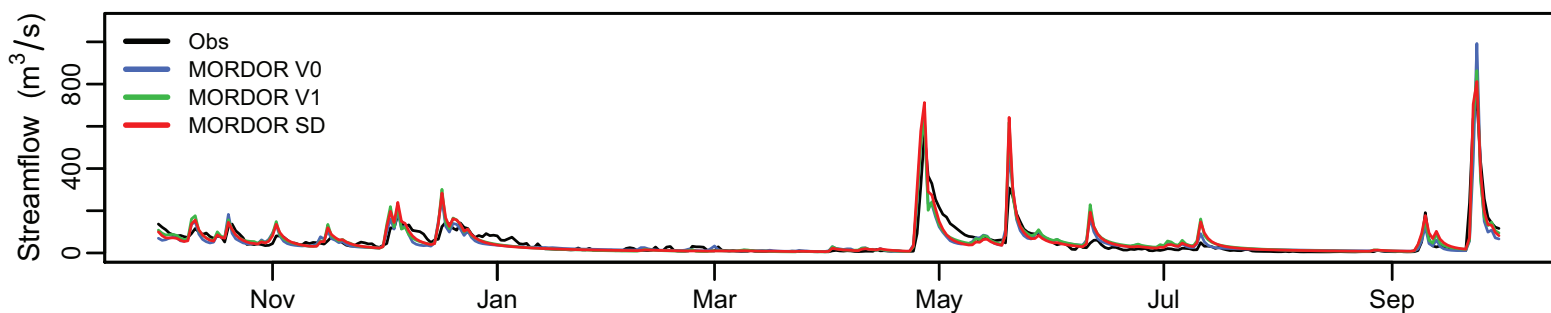

Year 1994

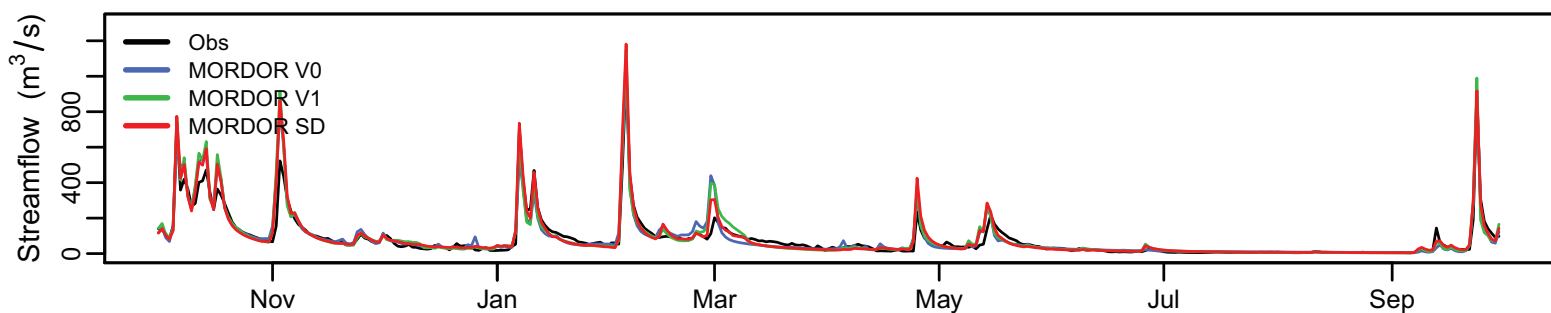

Year 1995

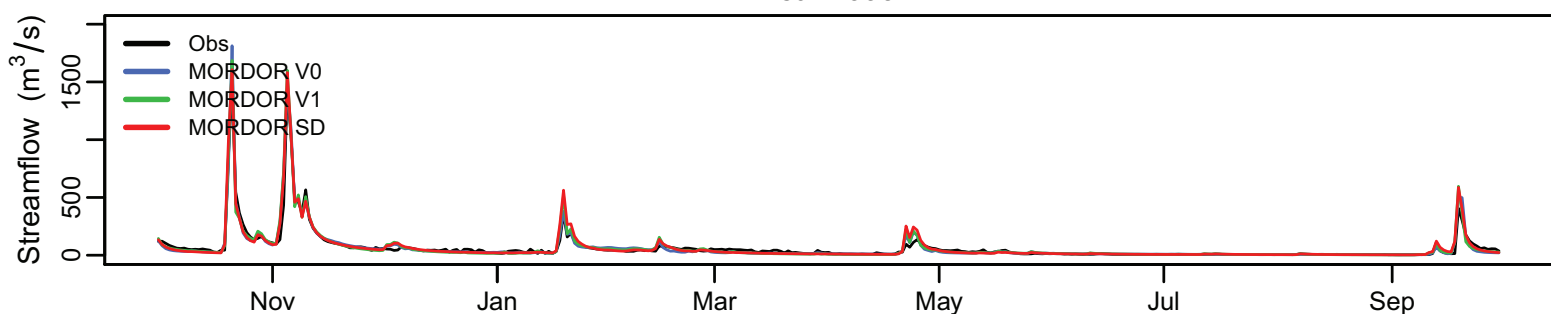

Year 1996

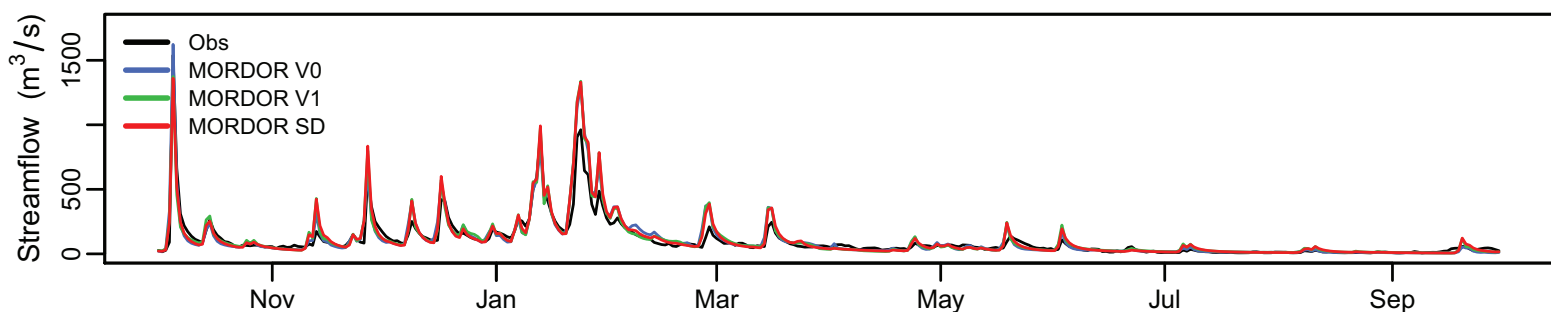

Year 1997

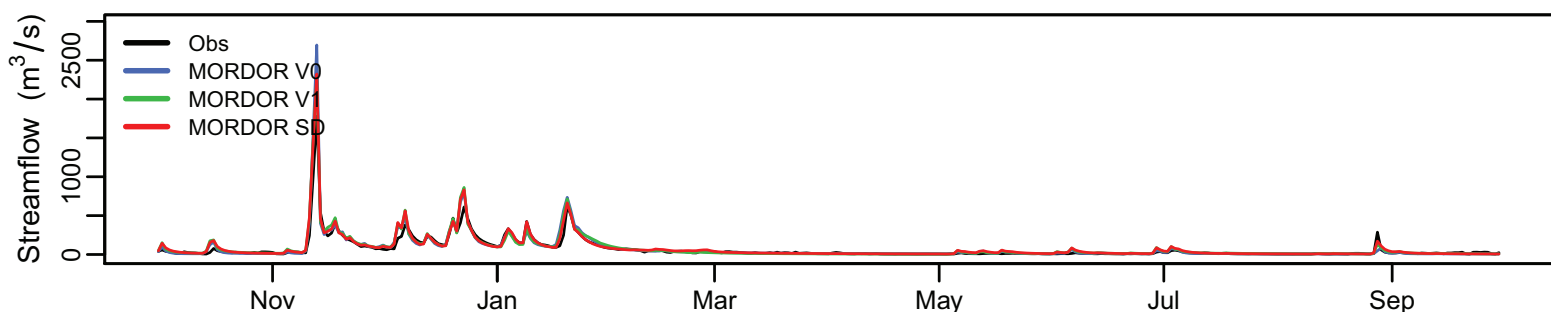

# Ardeche@Sauze

Year 1998

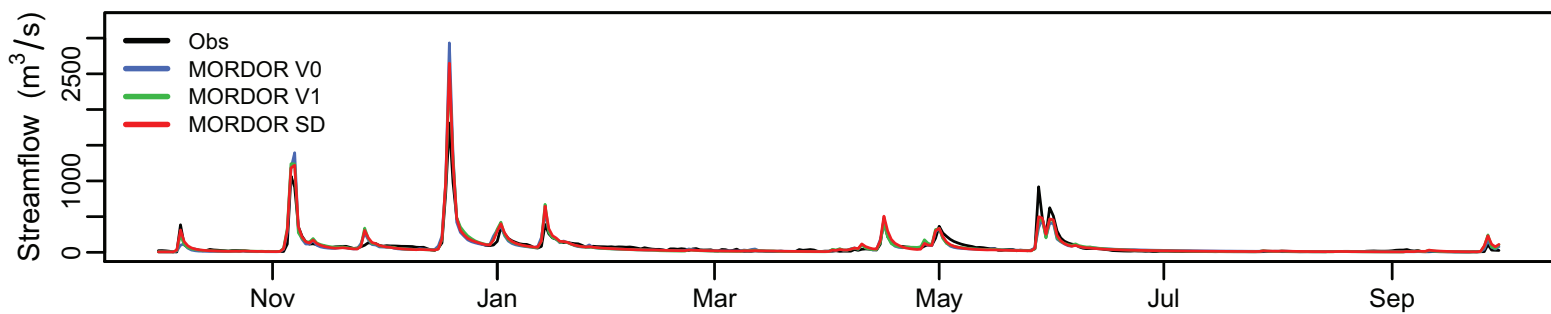

Year 1999

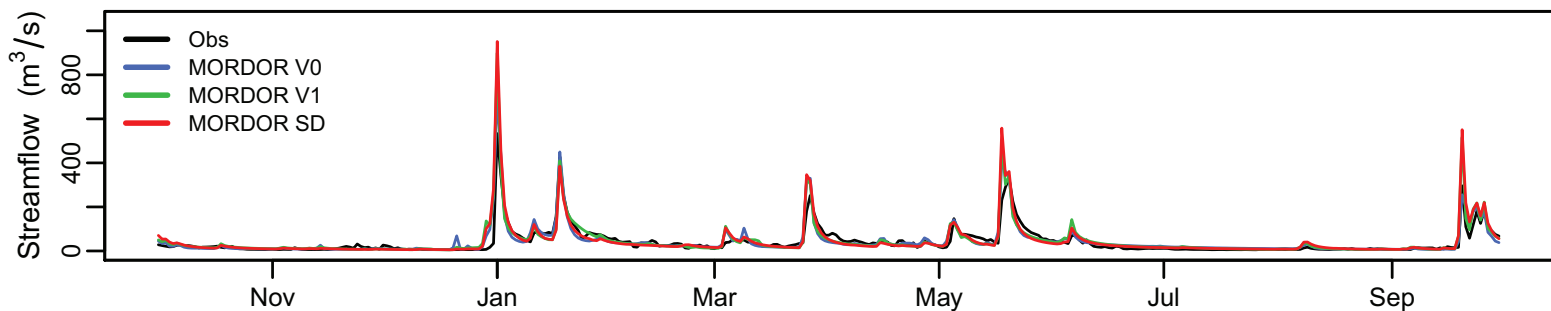

Year 2000

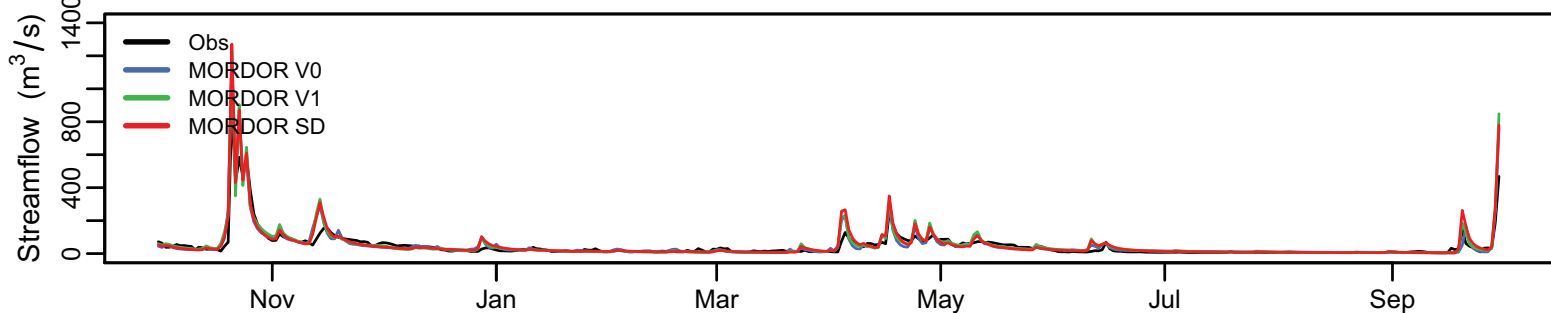

Year 2001

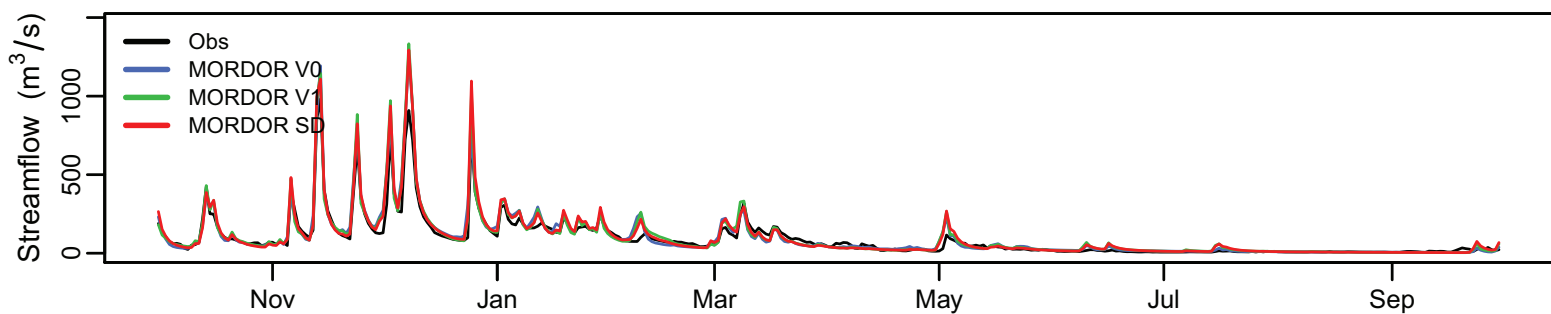

Year 2002

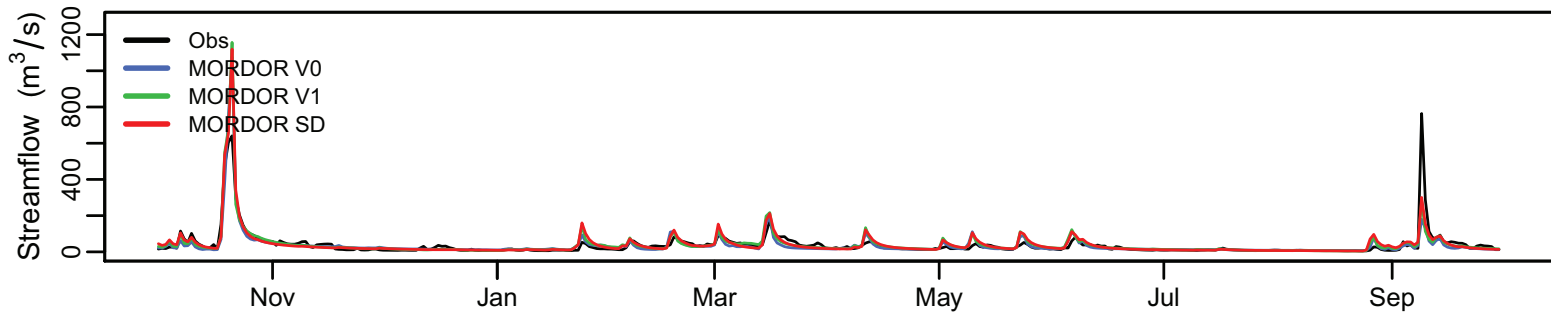

Year 2003

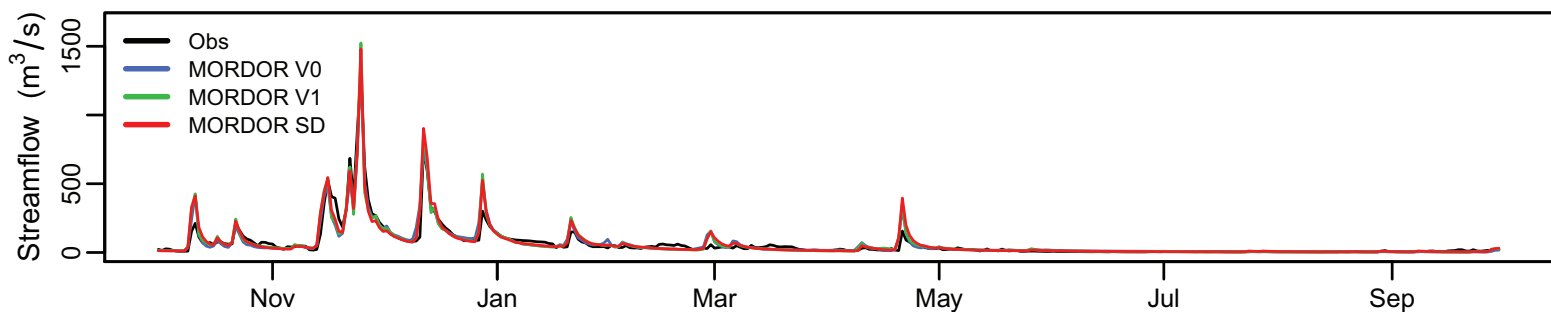

# Ardeche@Sauze

Year 2004

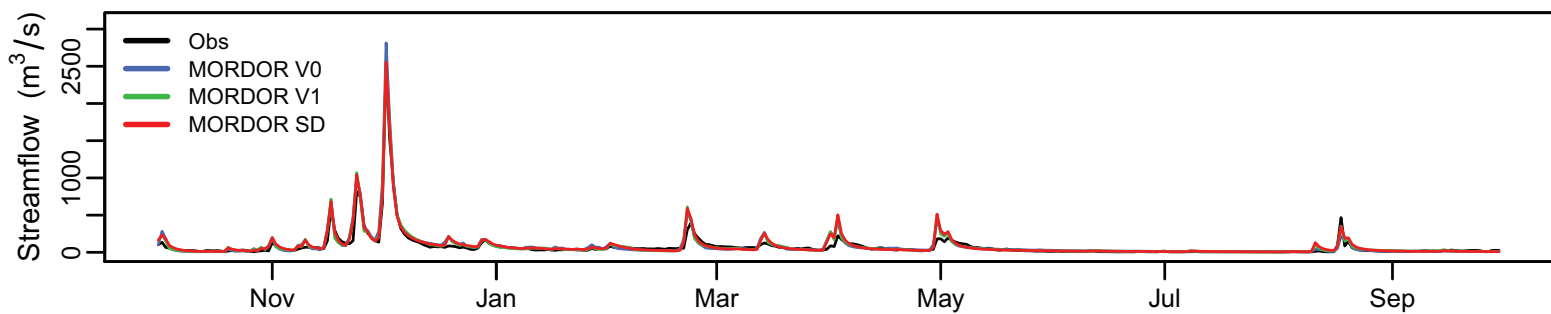

Year 2005

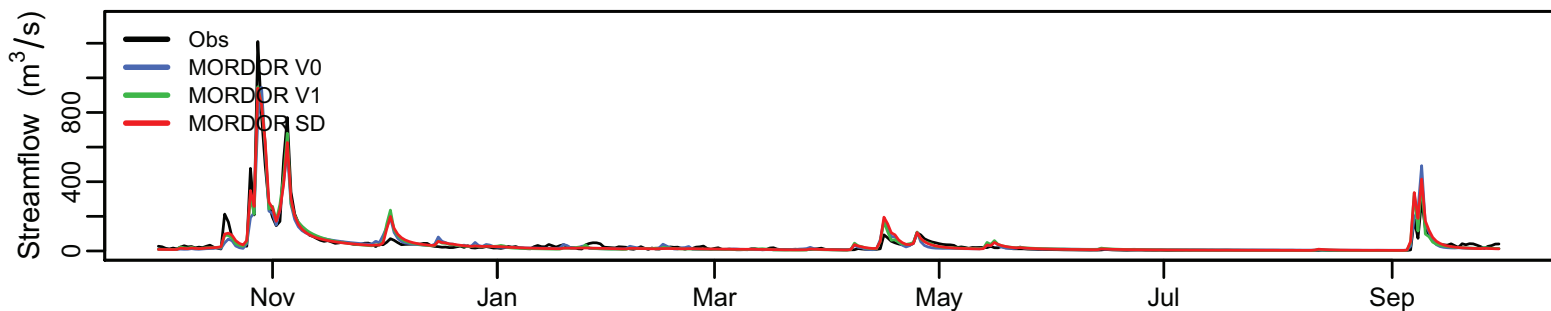

Year 2006

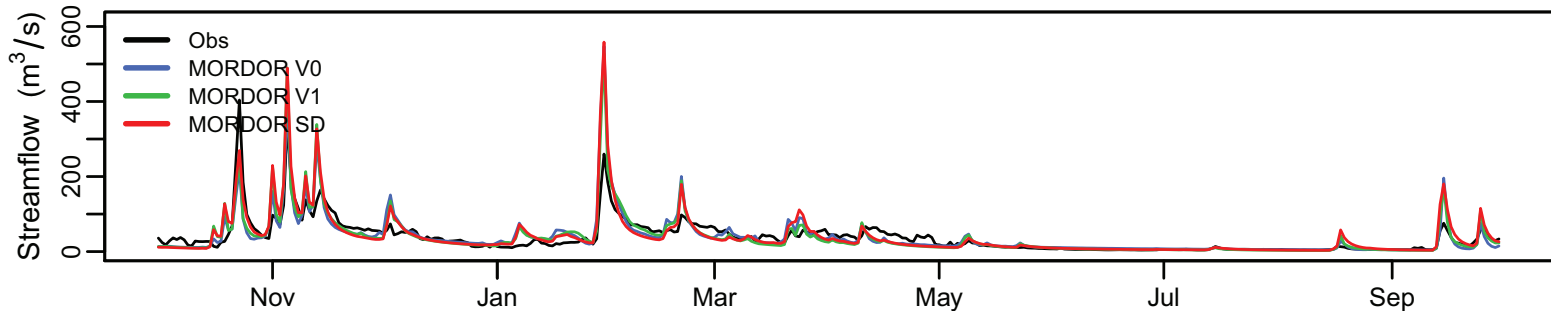

Year 2007

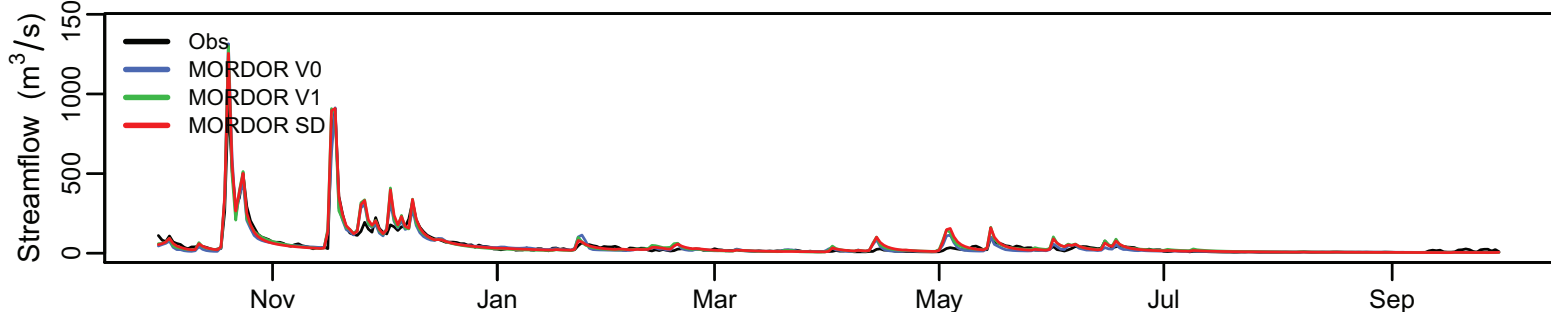

Year 2008

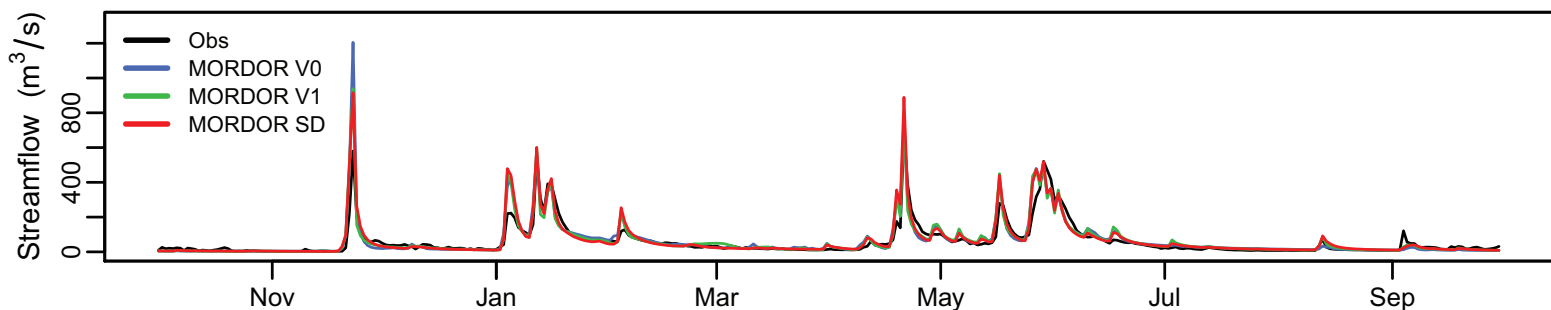

# Arn@Taillasses

Year 1988

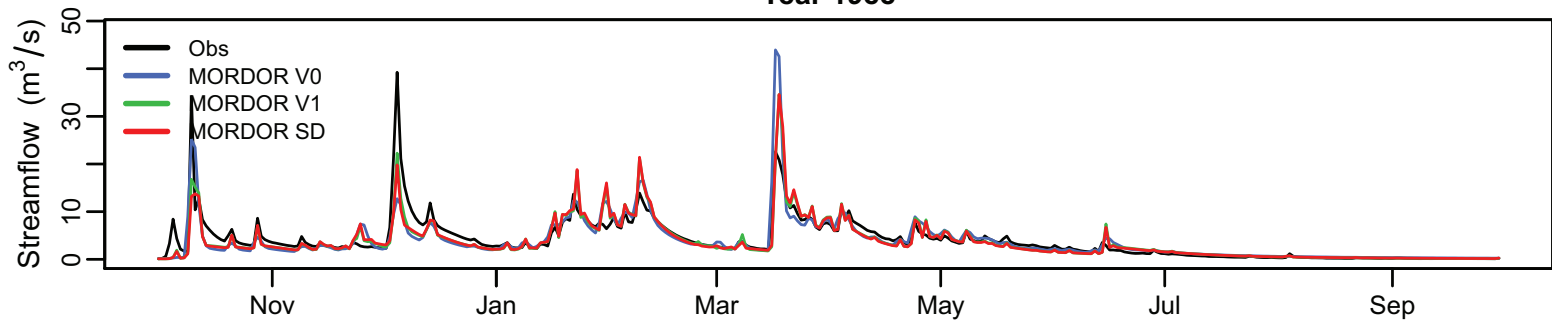

Year 1989

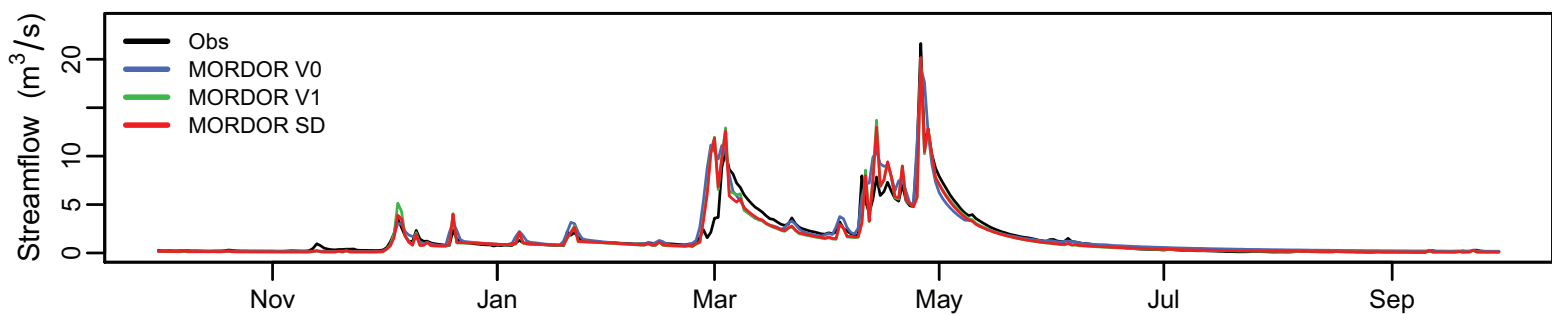

Year 1990

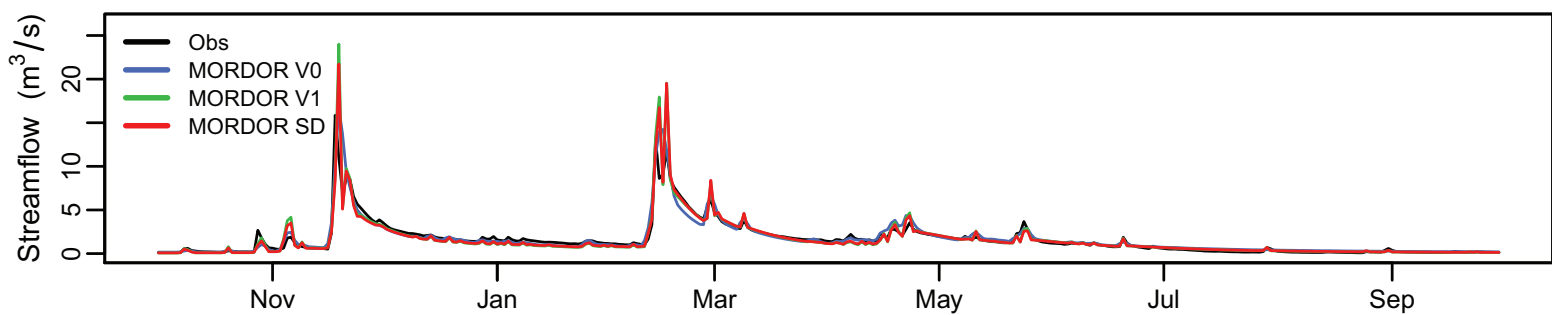

Year 1991

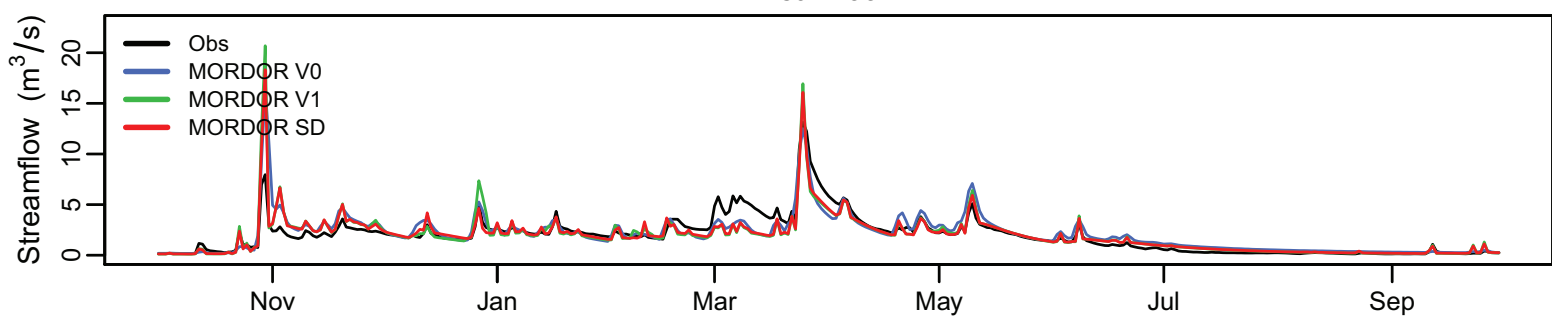

Year 1992

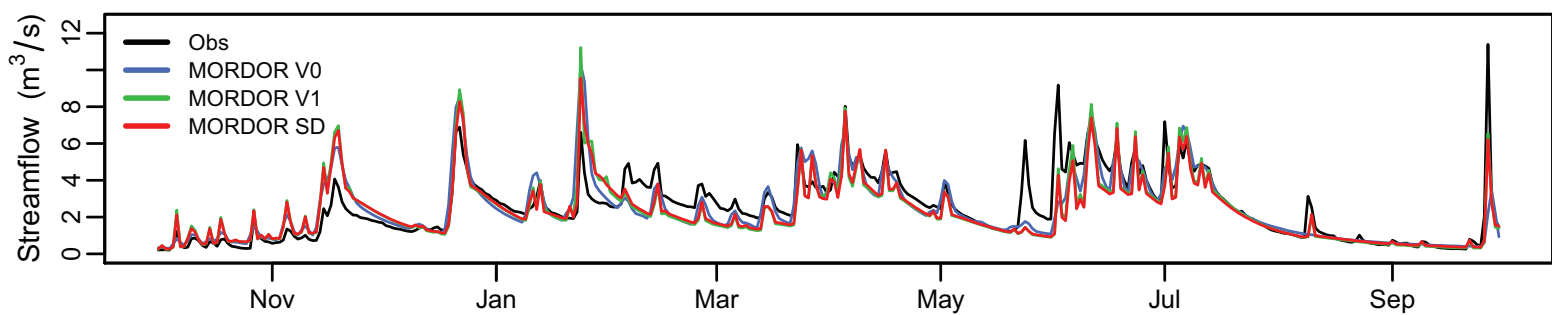

Year 1993

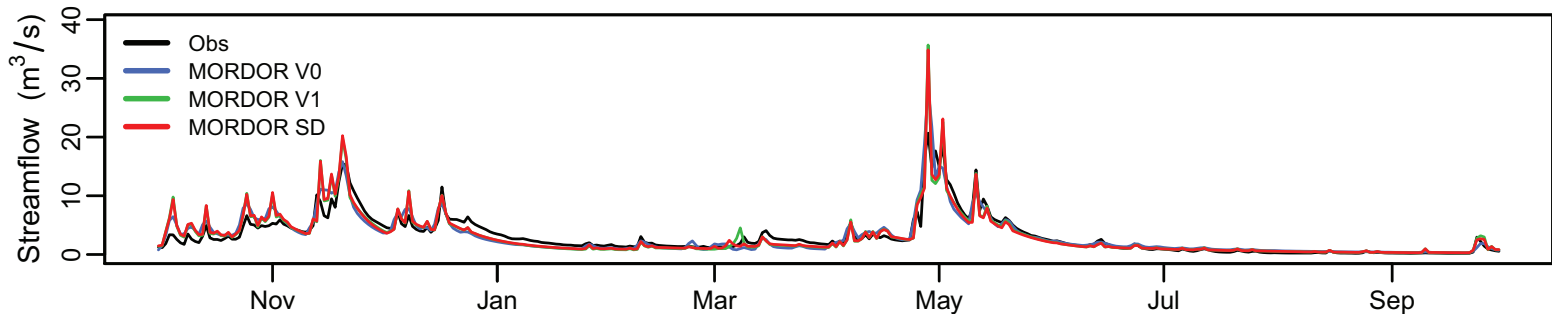

# Arn@Taillasses

Year 1994

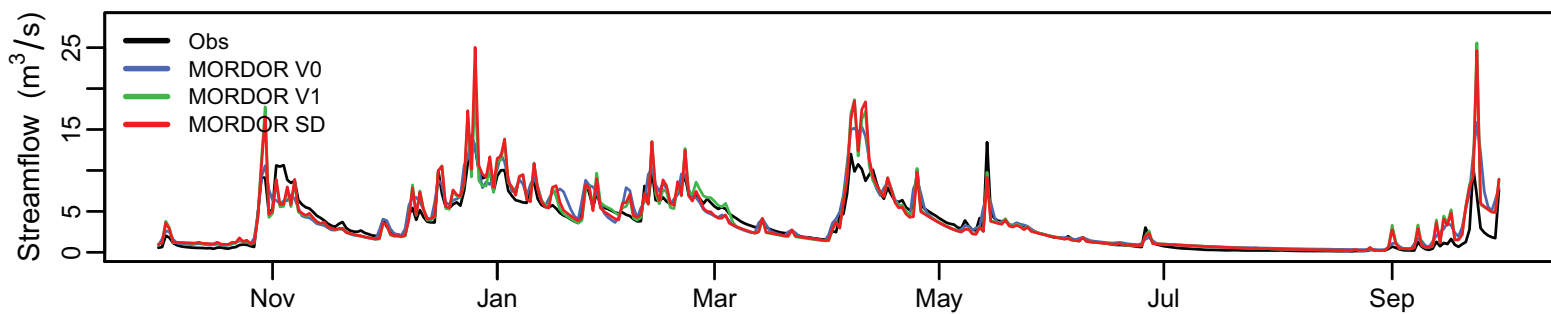

Year 1995

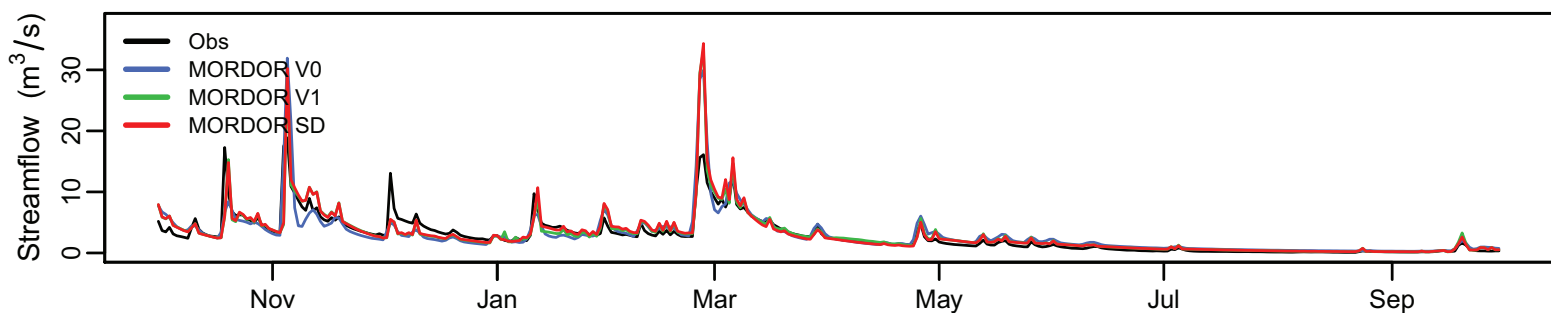

Year 1996

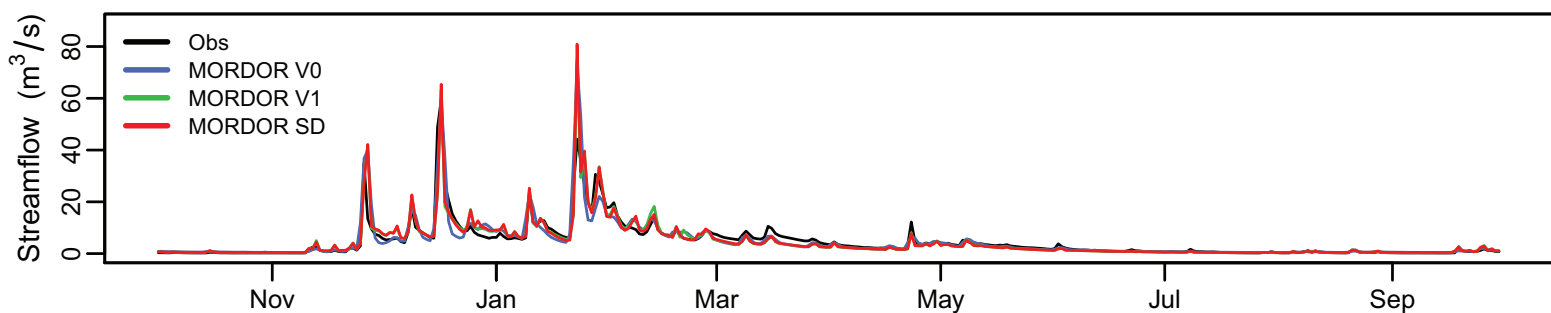

Year 1997

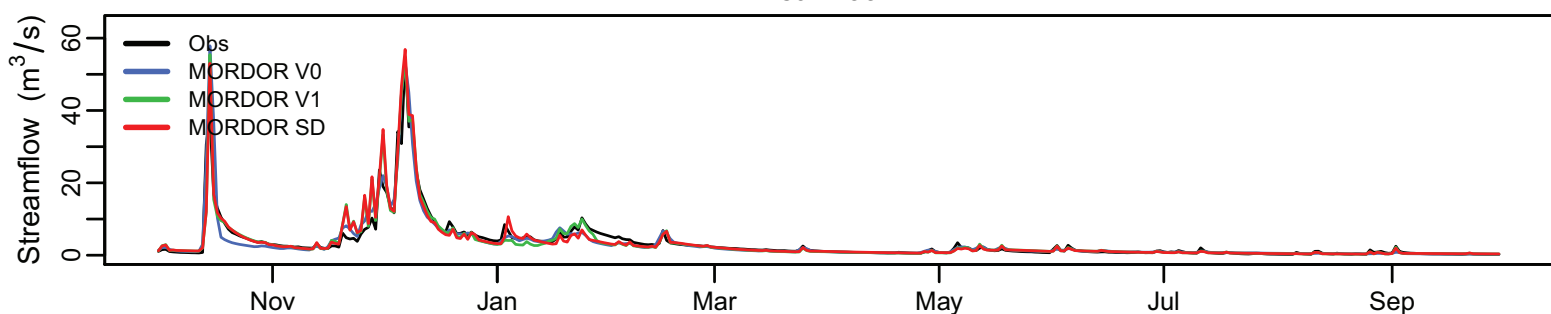

Year 1998

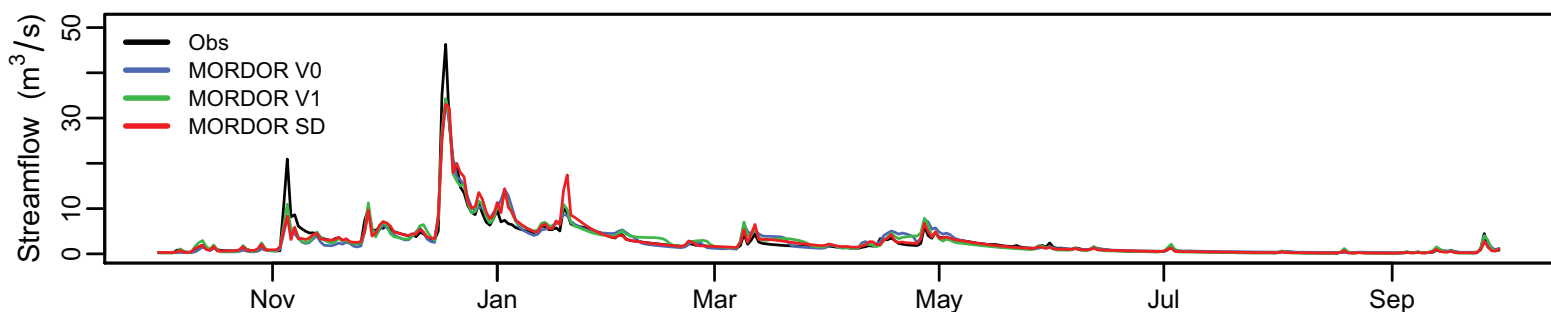

Year 1999

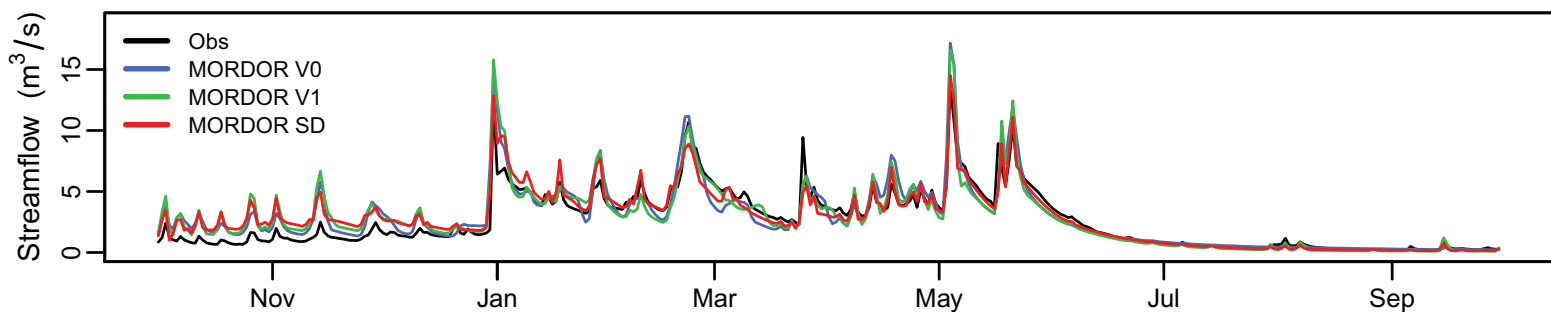

# Arn@Tailades

Year 2000

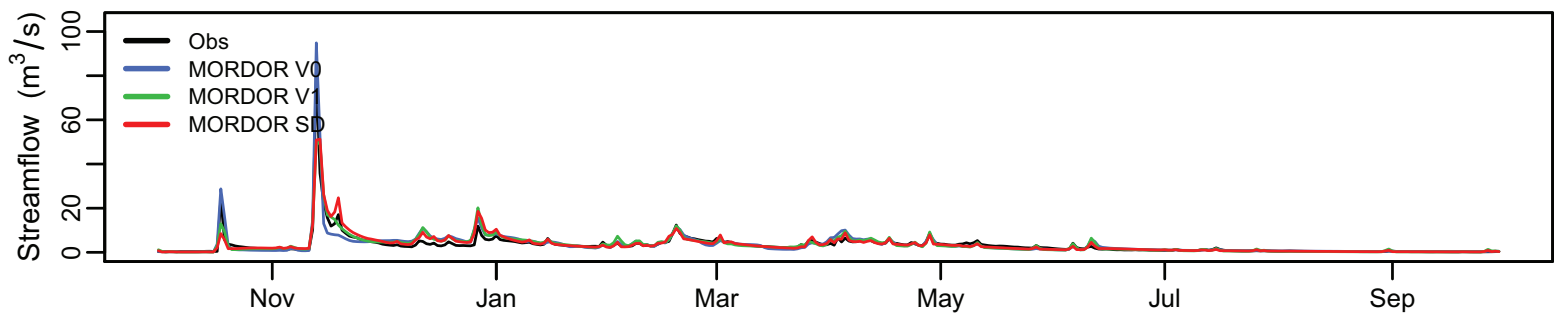

Year 2001

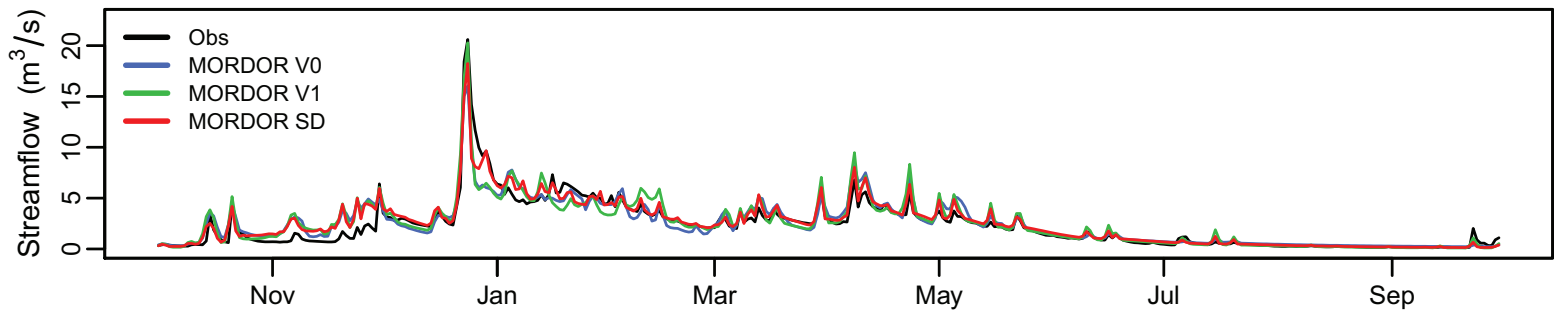

Year 2002

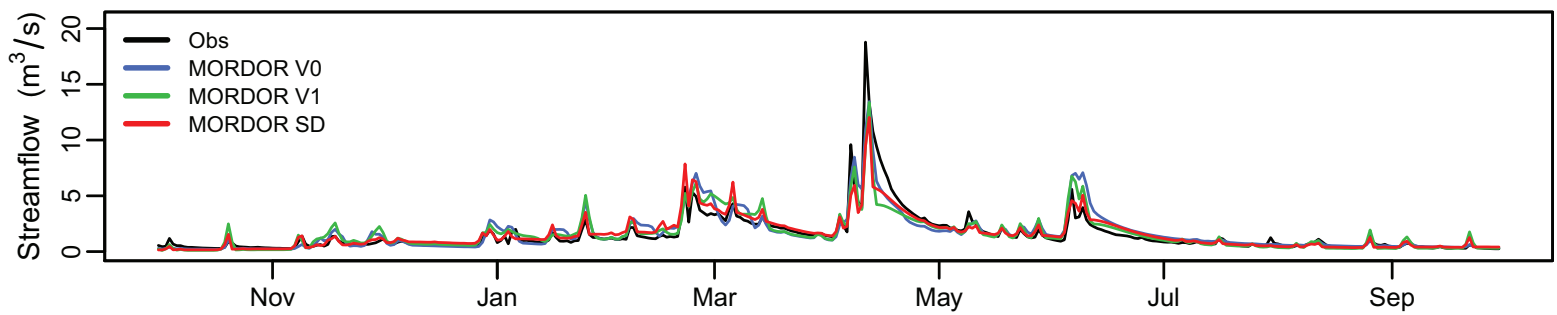

Year 2003

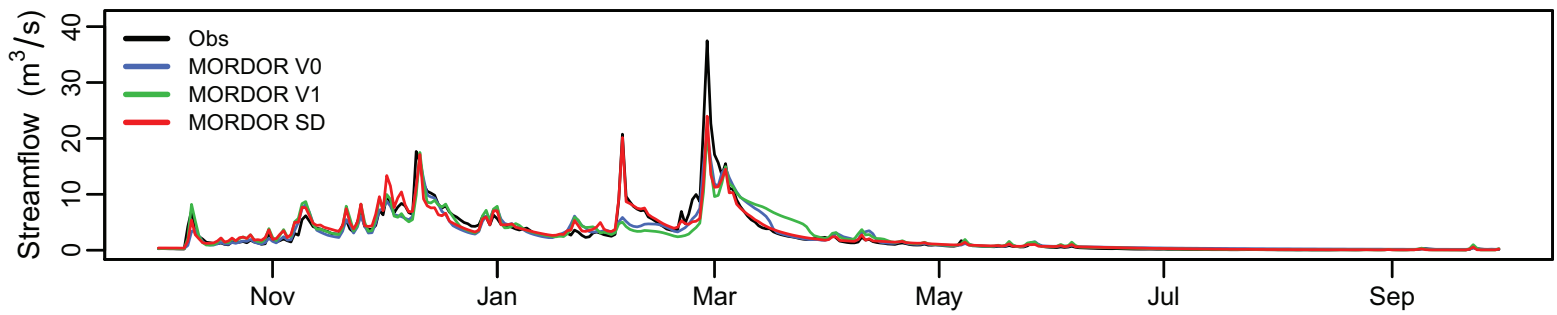

Year 2004

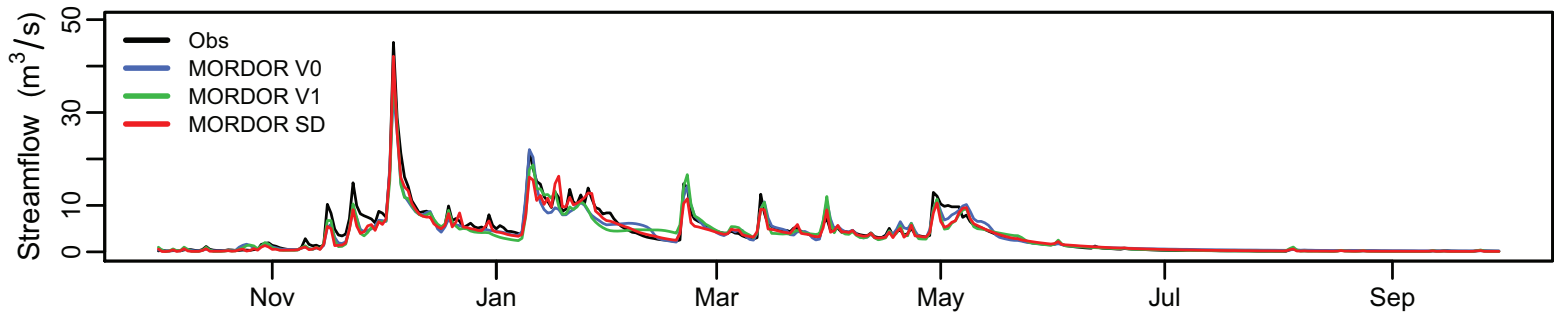

Year 2005

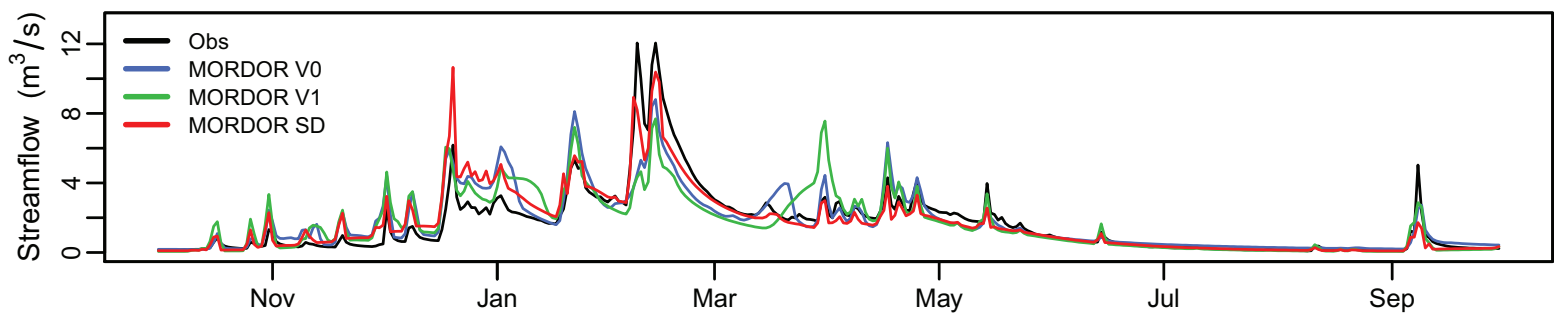



# Arn@Tailades

Year 2006

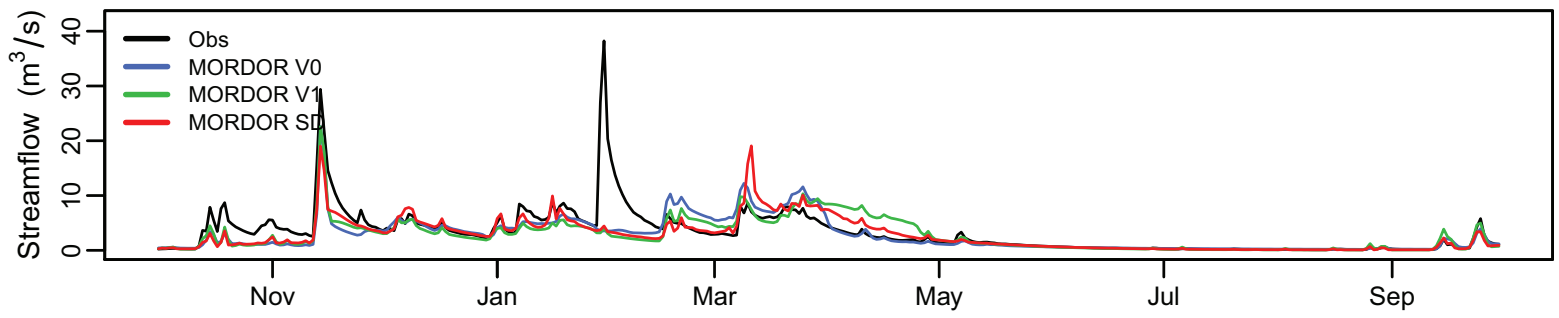

Year 2007

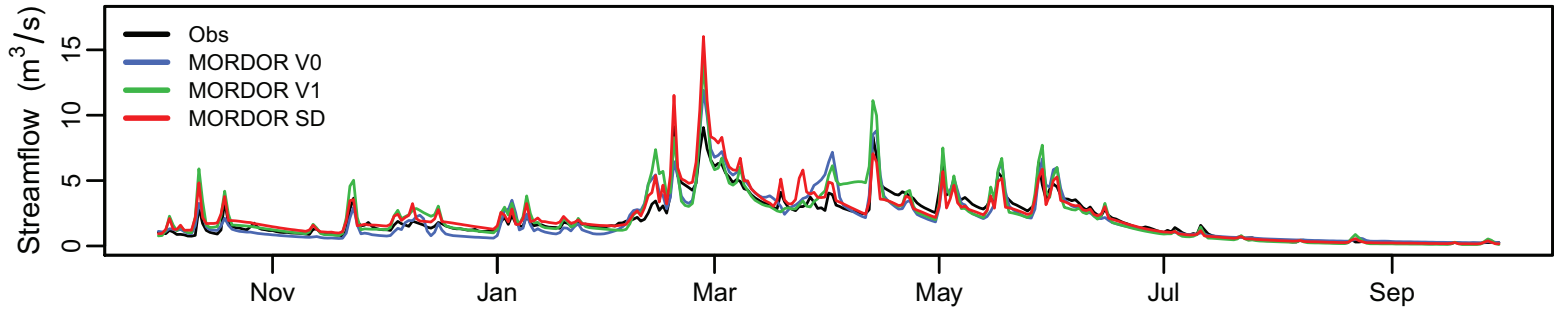

# Arve@Arthaz

Year 1987

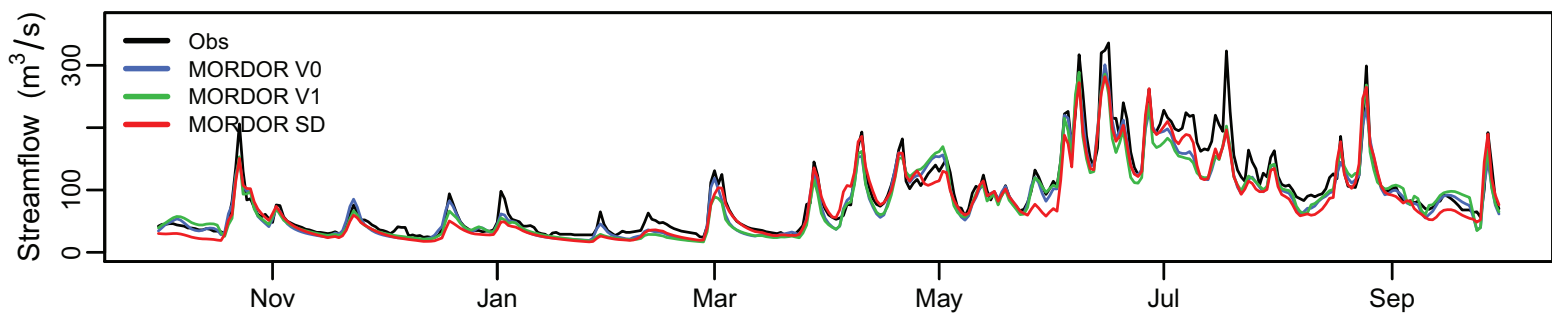

Year 1988

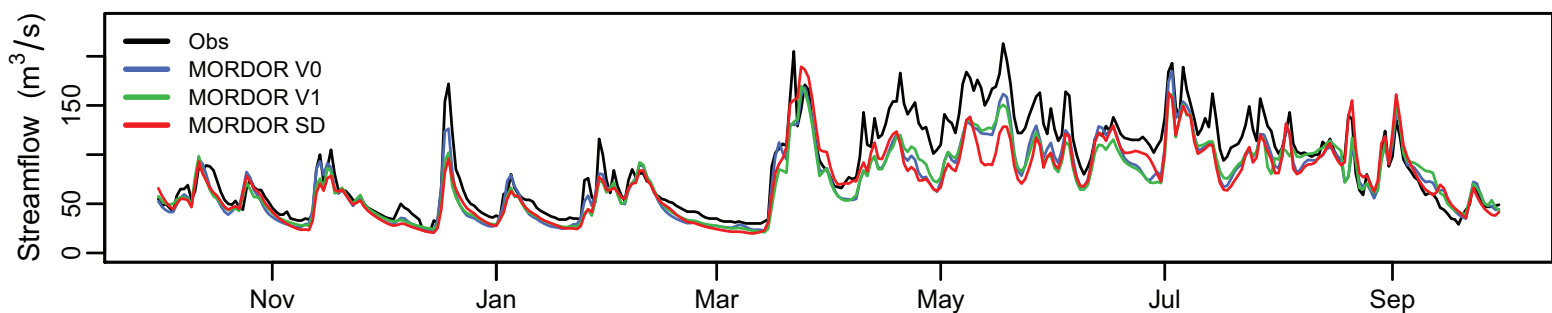

Year 1989

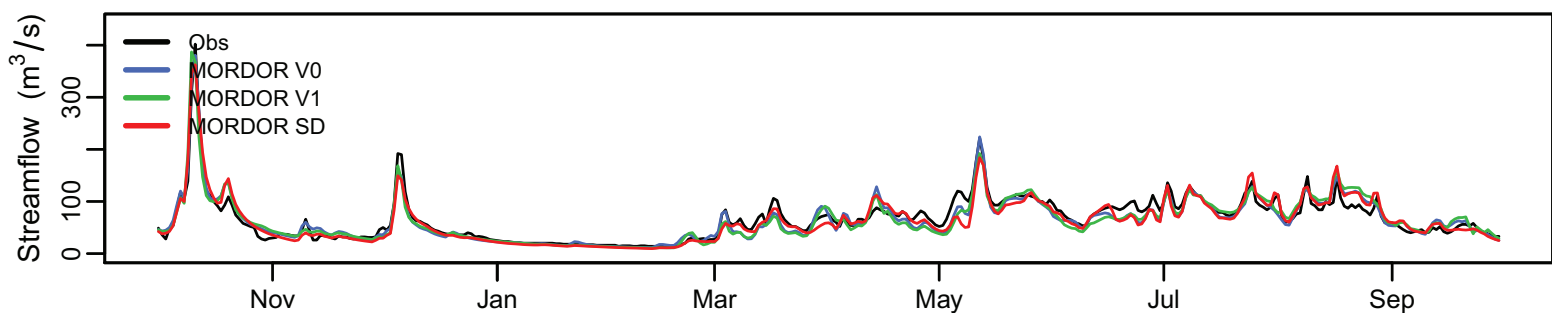

Year 1990

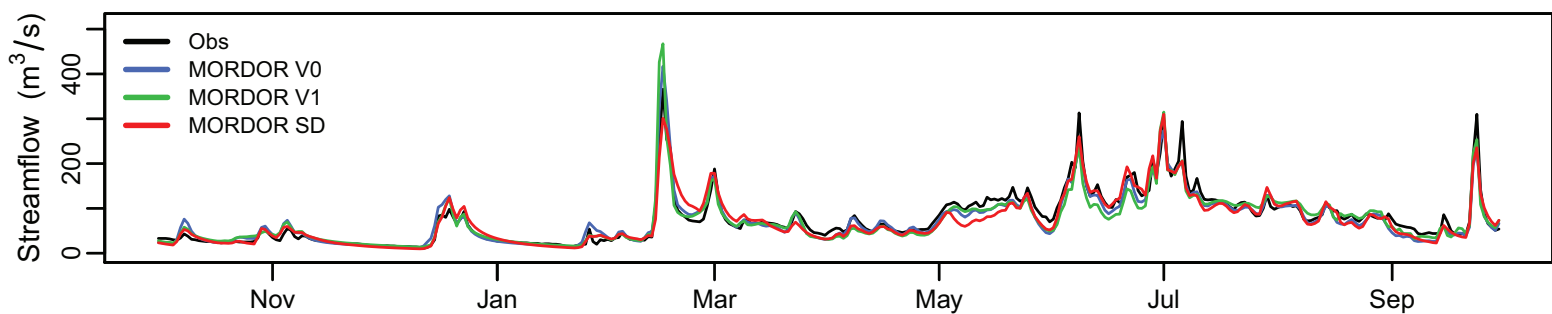

Year 1991

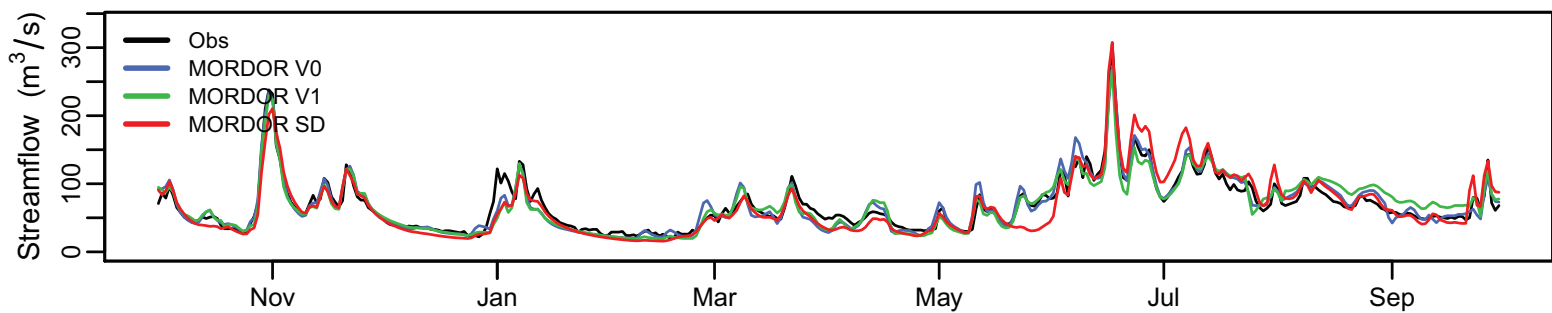

Year 1992

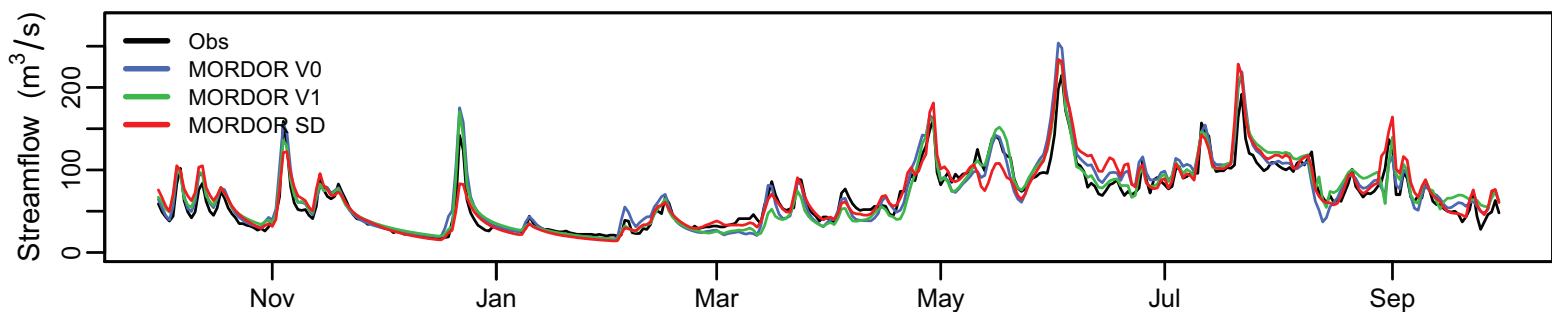

# Arve@Arthaz

Year 1993

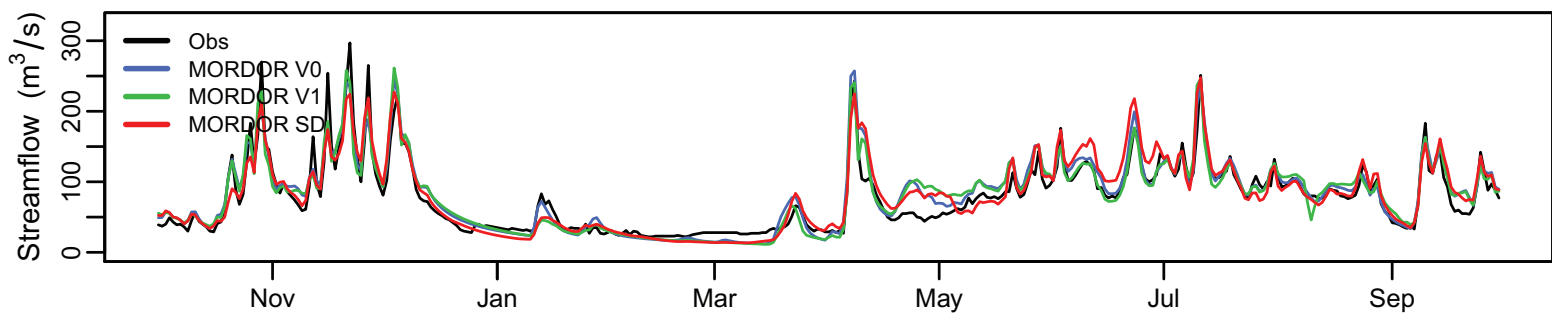

Year 1994

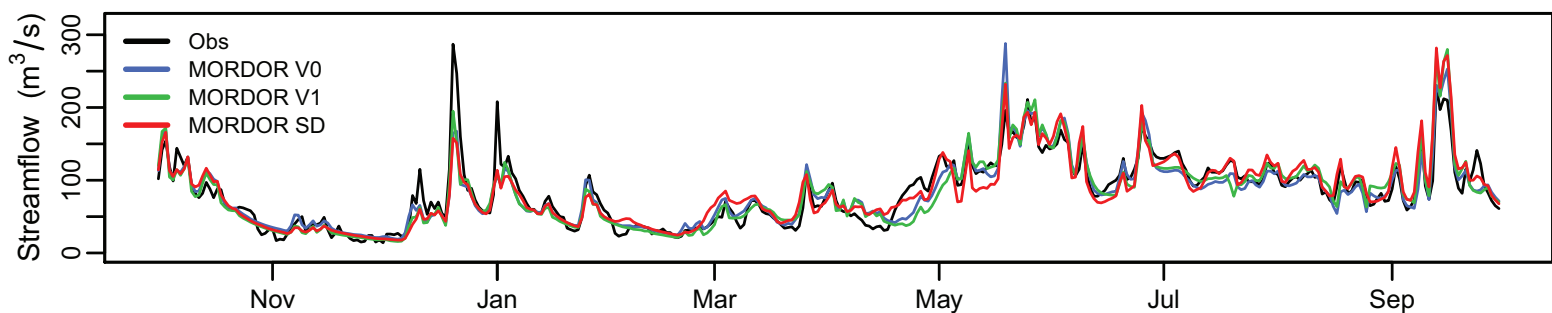

Year 1995

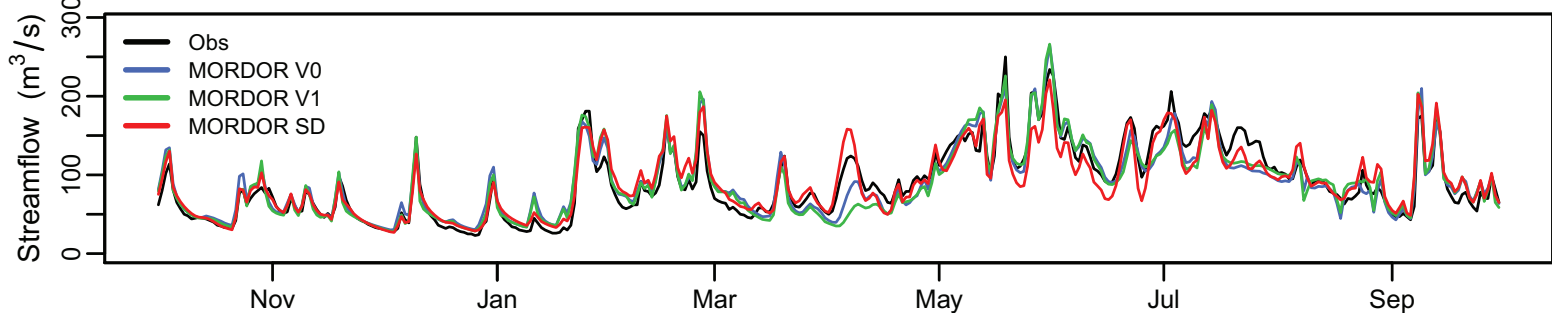

Year 1996

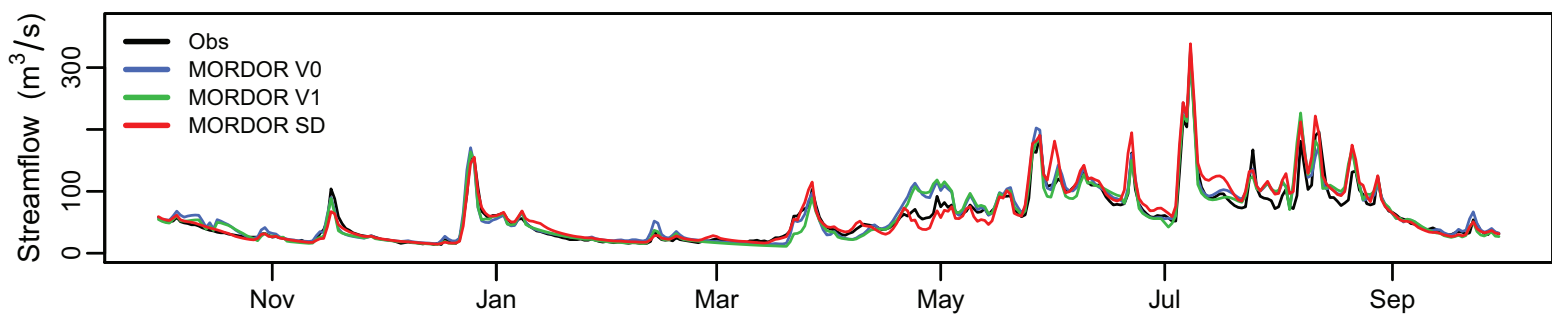

Year 1997

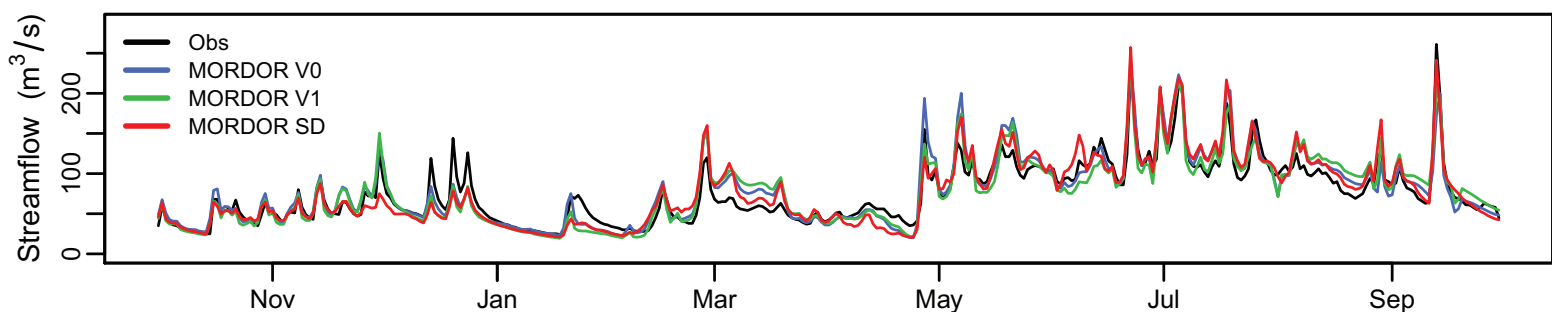

Year 1998

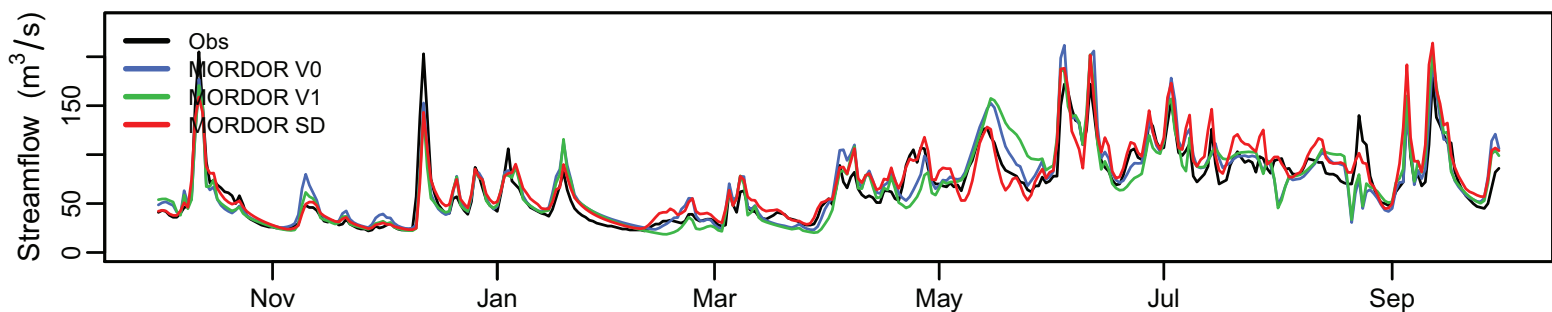

# Arve@Arthaz

Year 1999

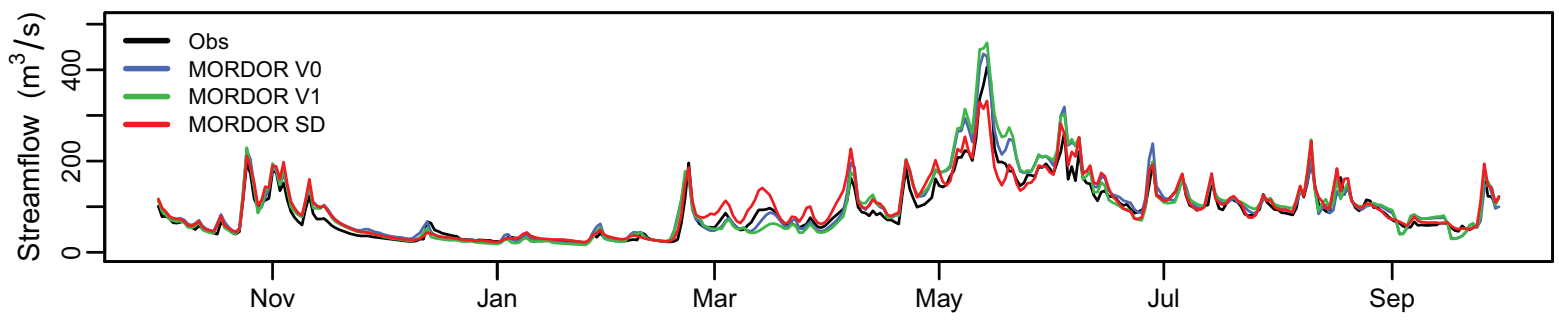

Year 2000

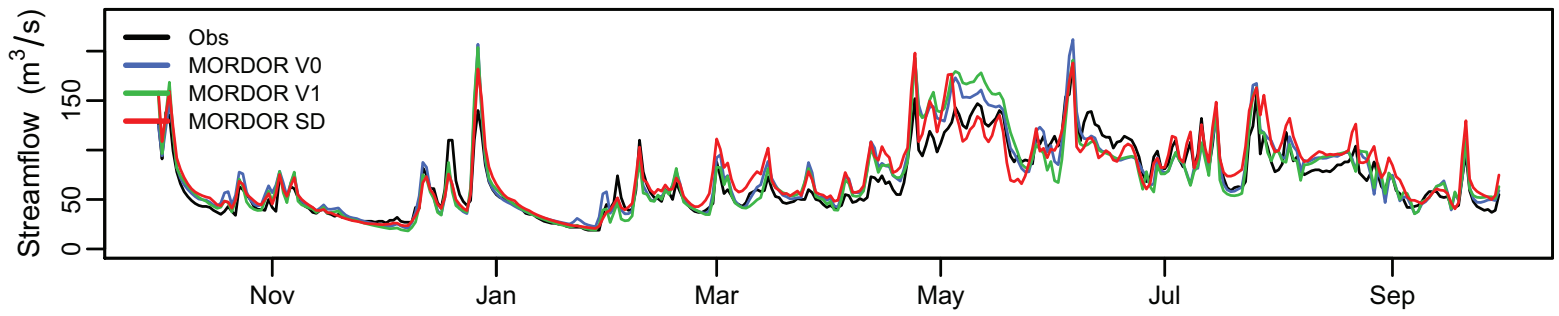

# Behine@LaPoutroie

Year 1985

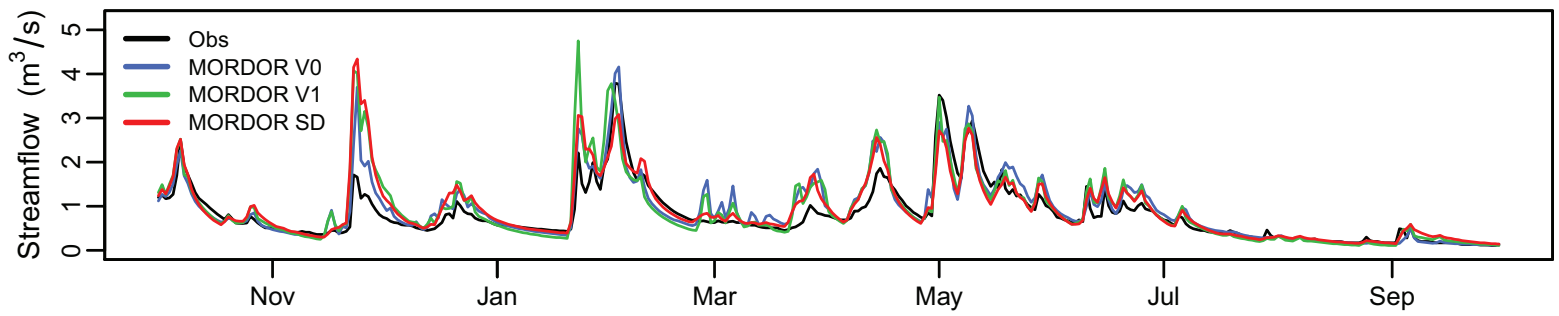

Year 1986

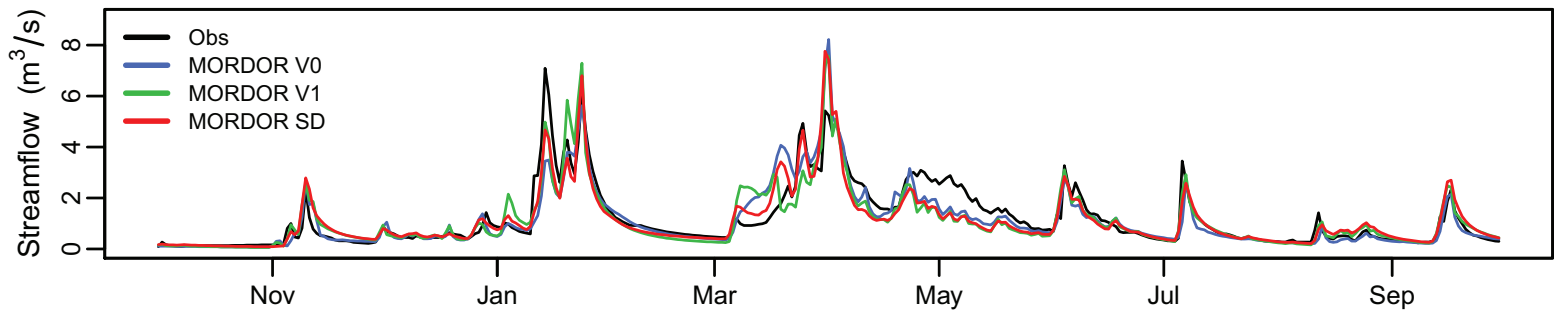

Year 1987

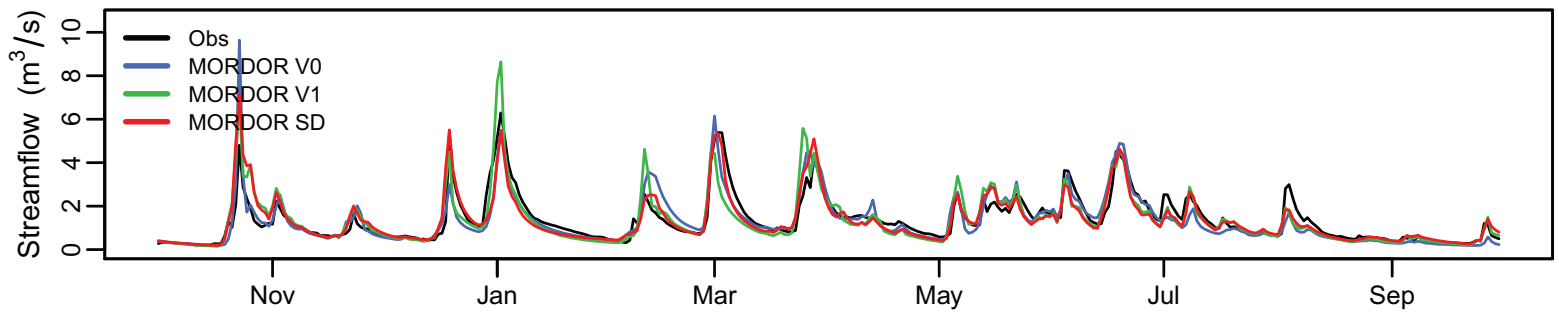

Year 1988

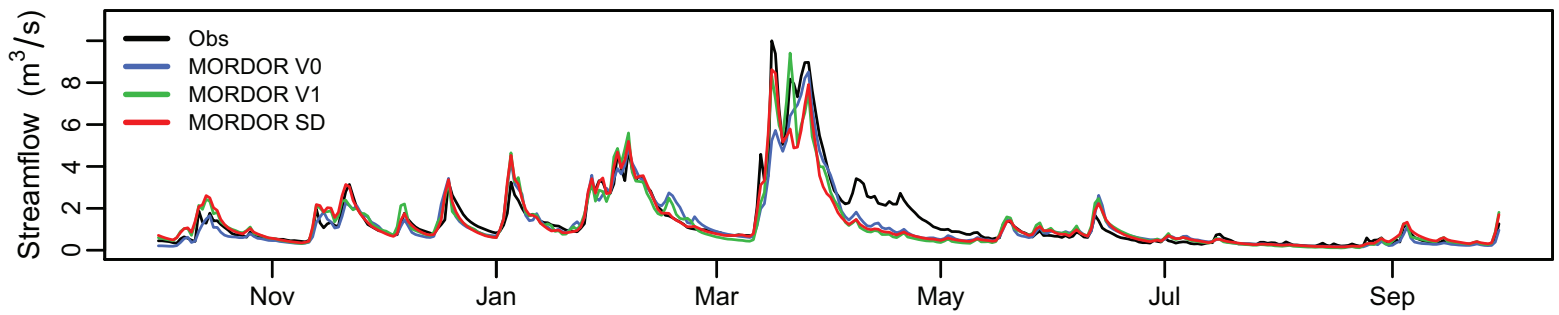

Year 1989

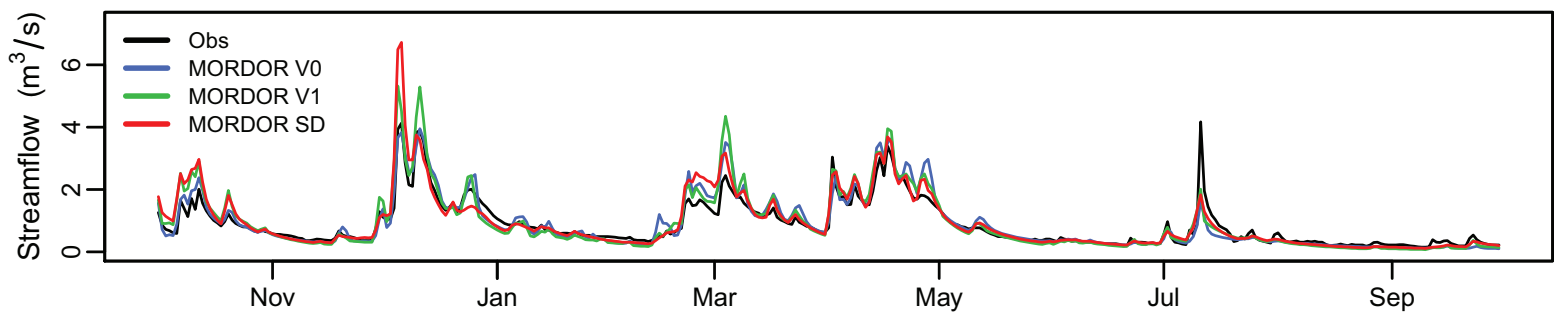

Year 1990

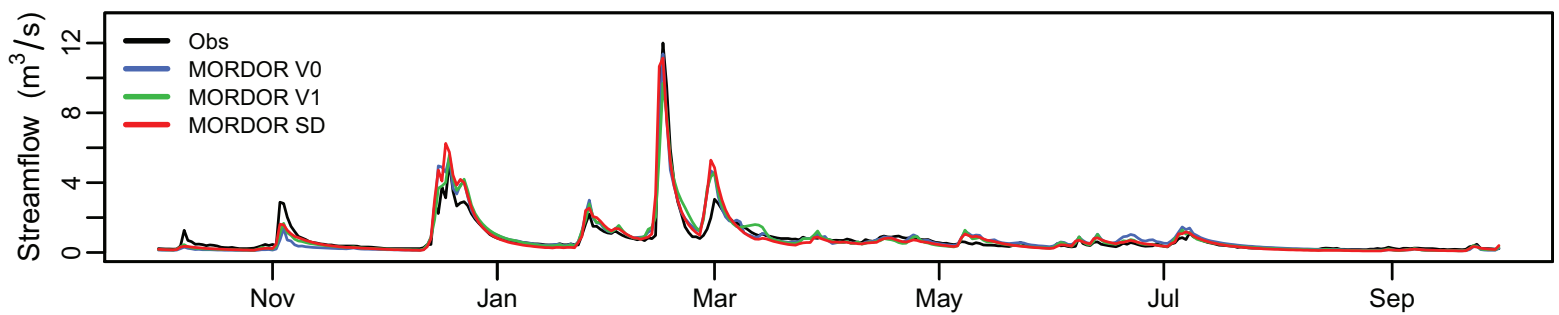

# Behine@LaPoutroie

Year 1991

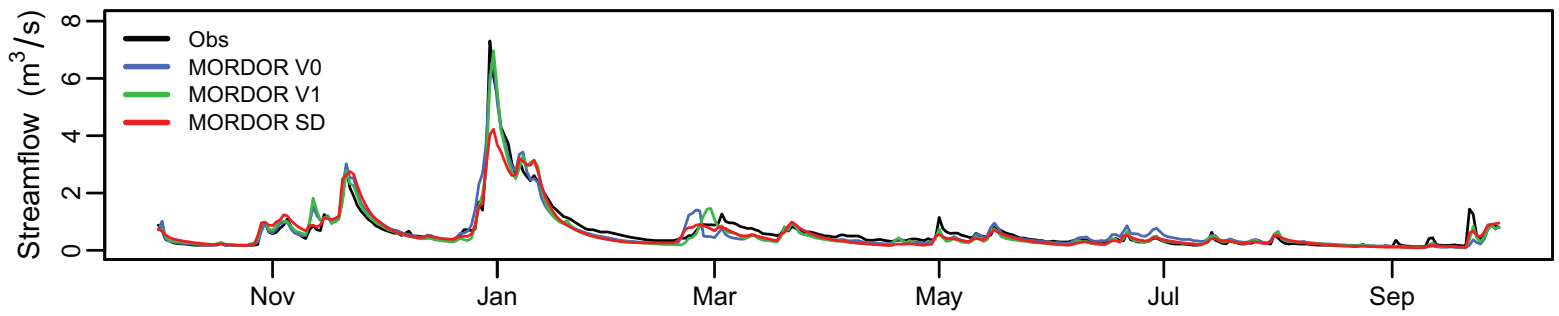

Year 1992

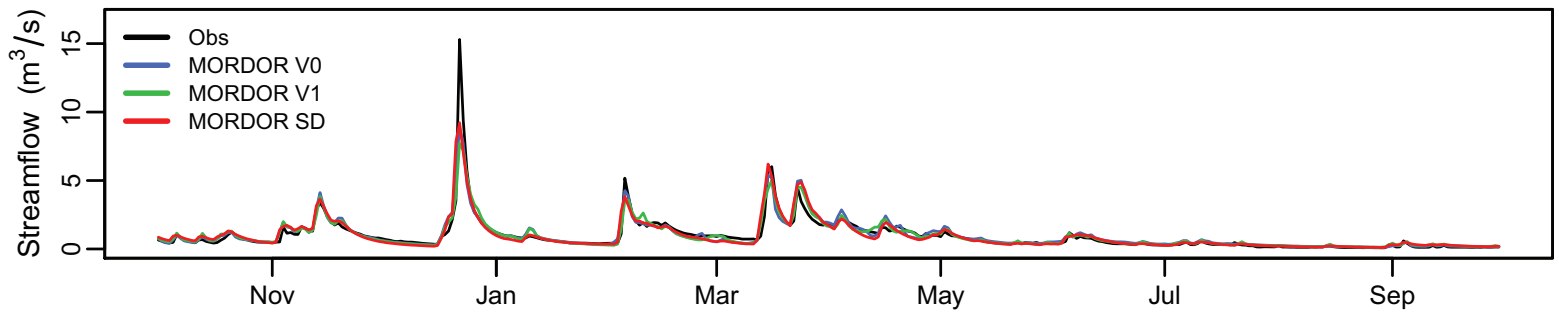

Year 1993

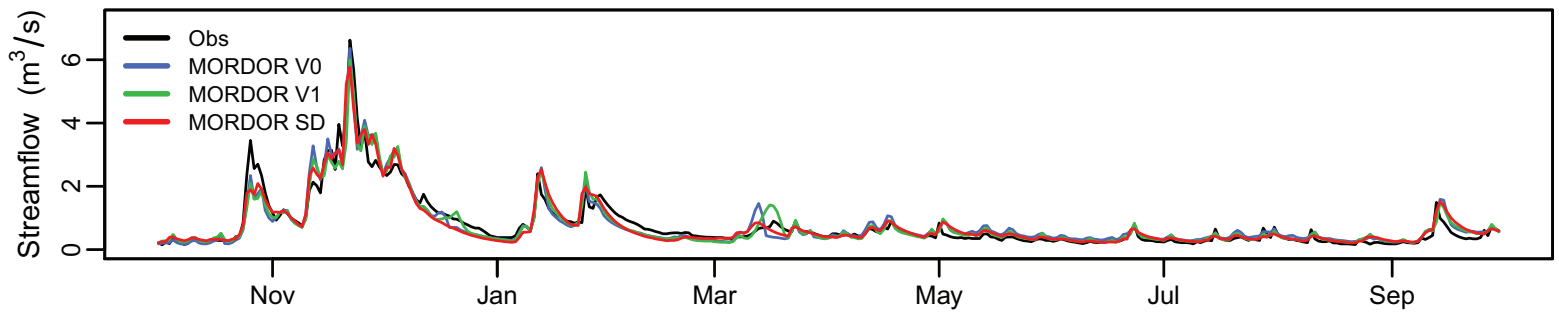

# Breze@Meyrueis

Year 1986

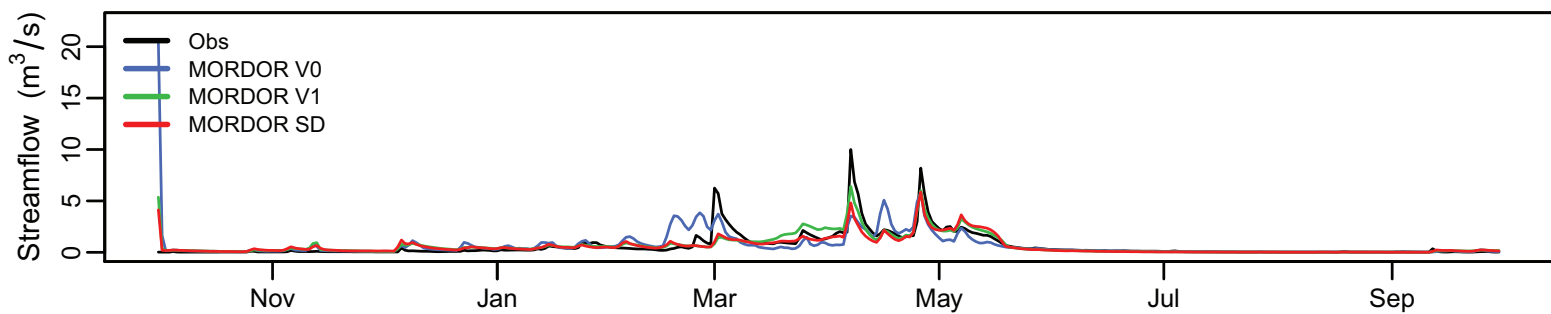

Year 1987

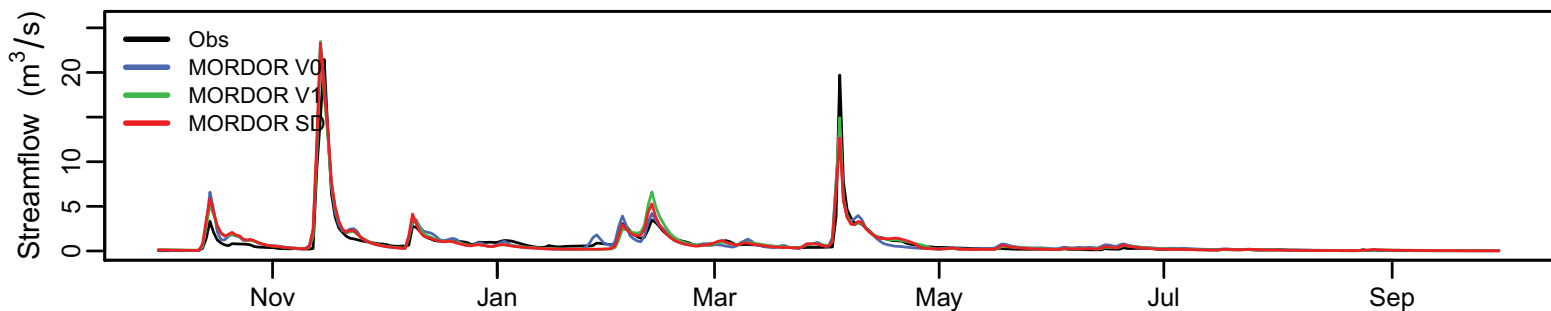

Year 1988

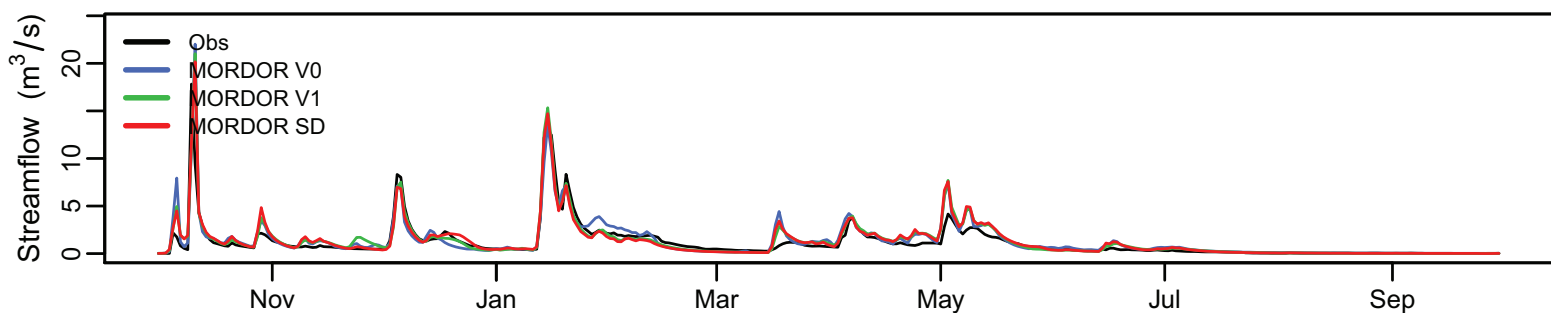

Year 1989

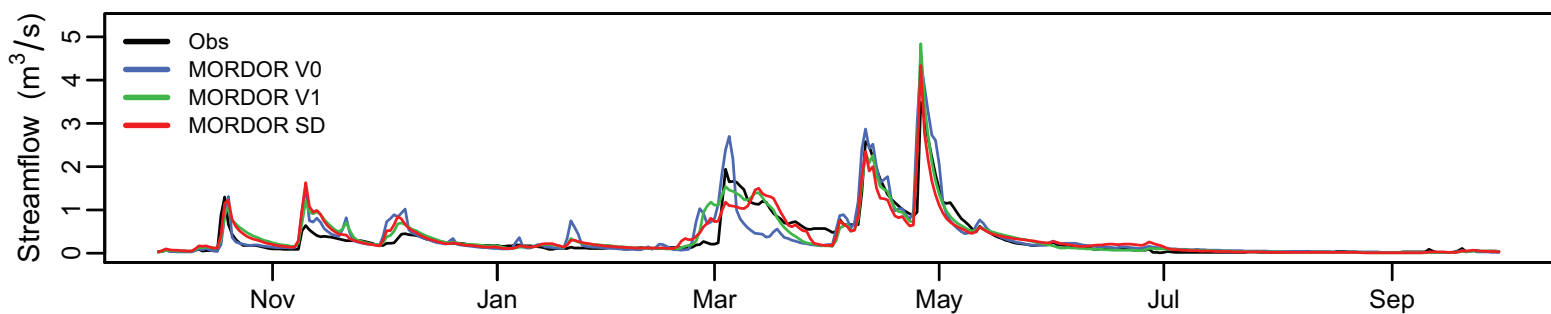

Year 1990

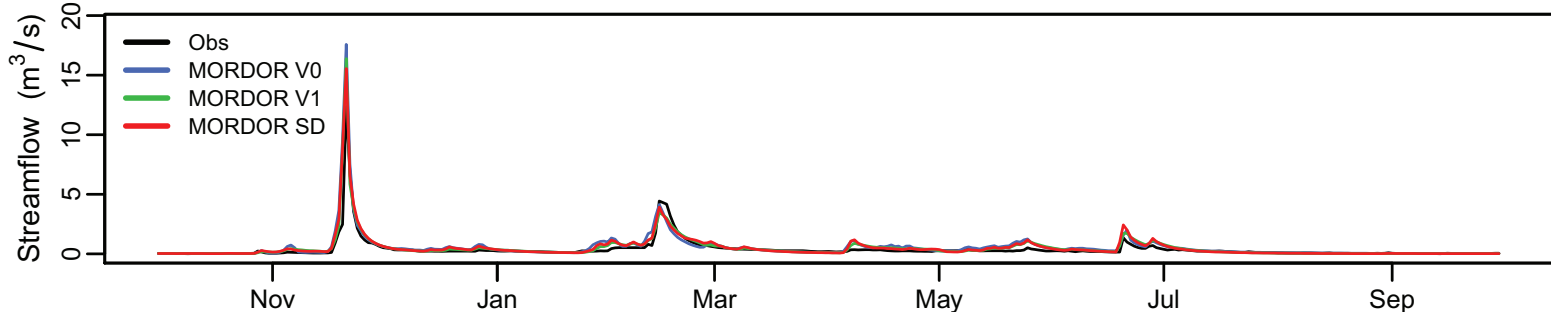

Year 1991

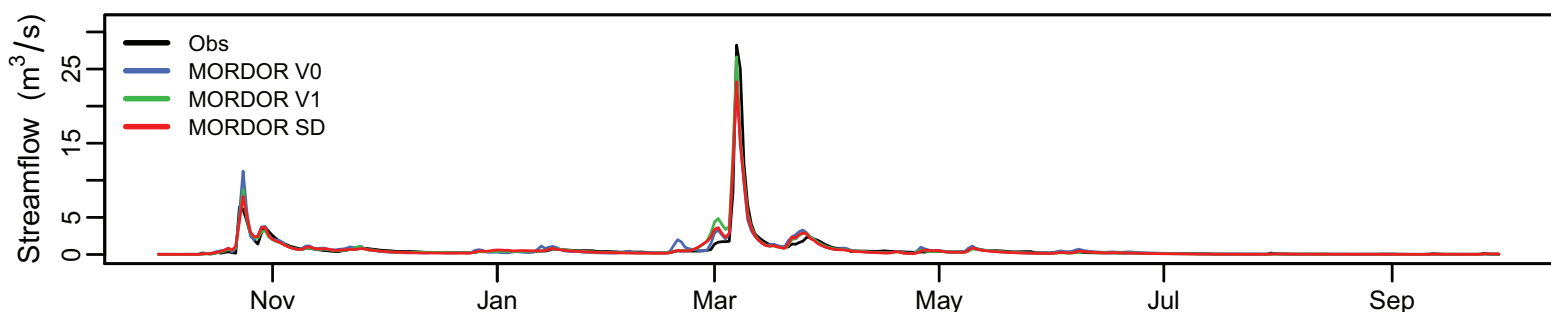

# Breze@Meyrueis

Year 1992

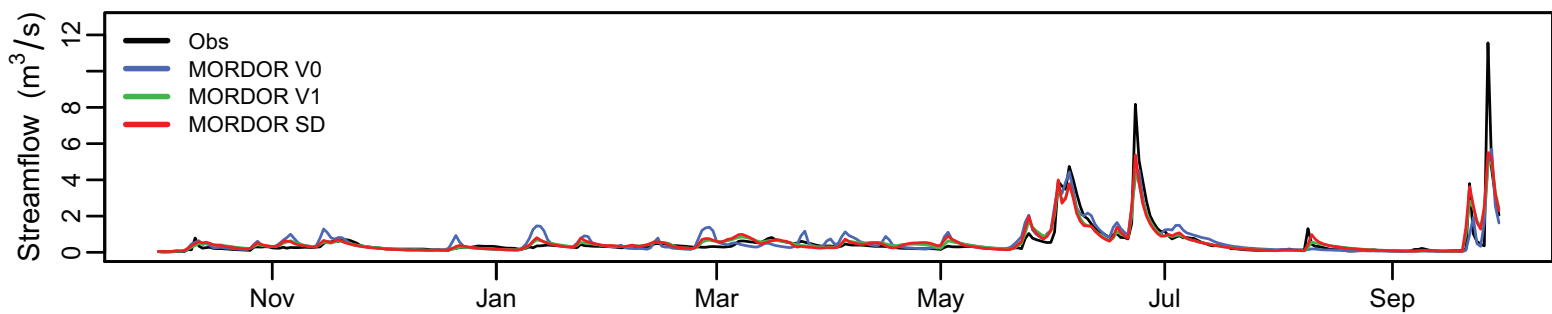

Year 1993

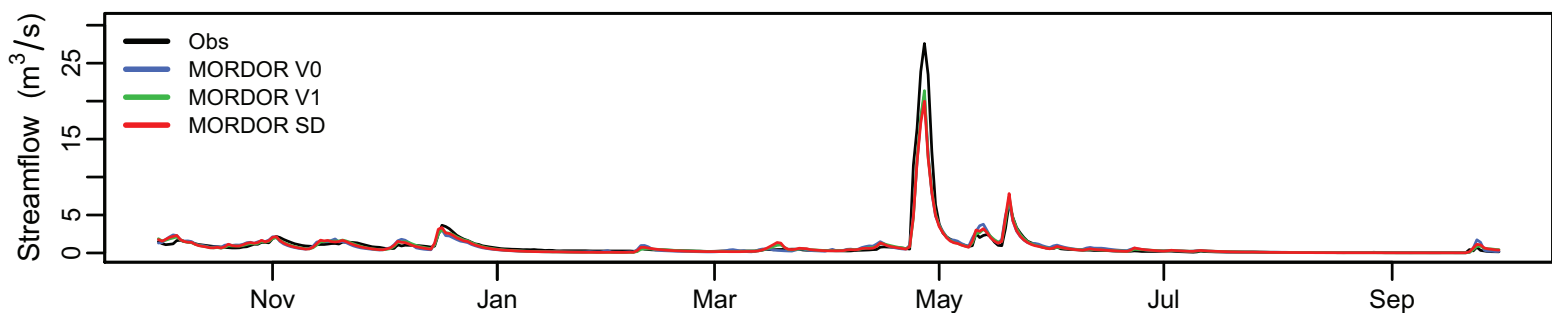

Year 1994

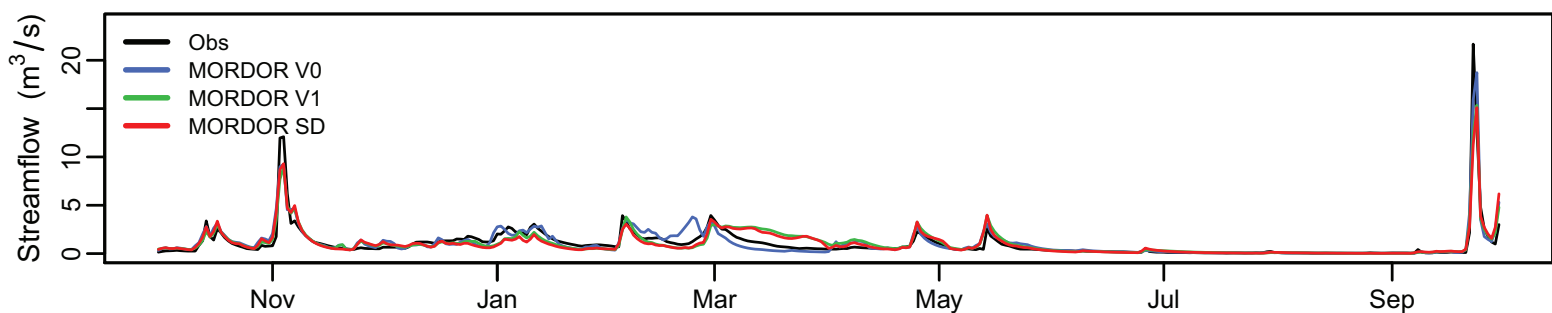

Year 1995

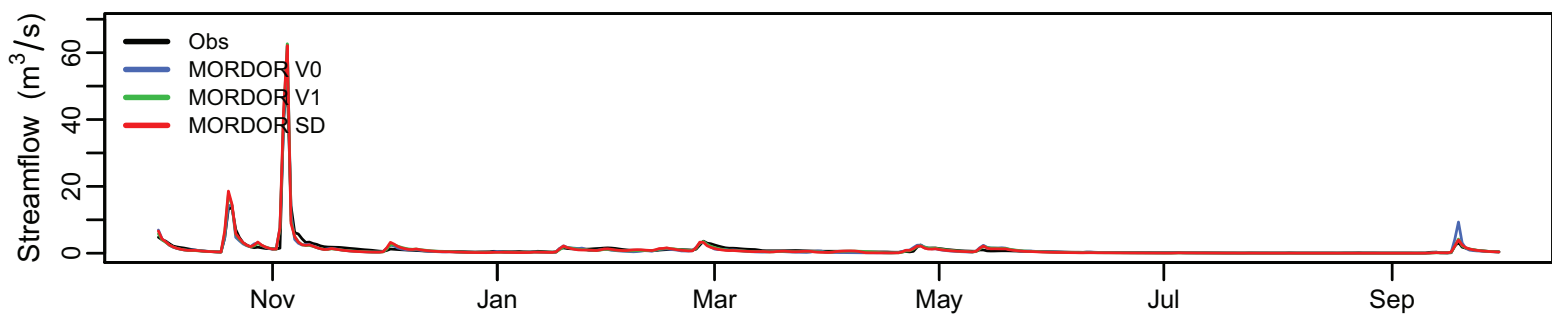

Year 1996

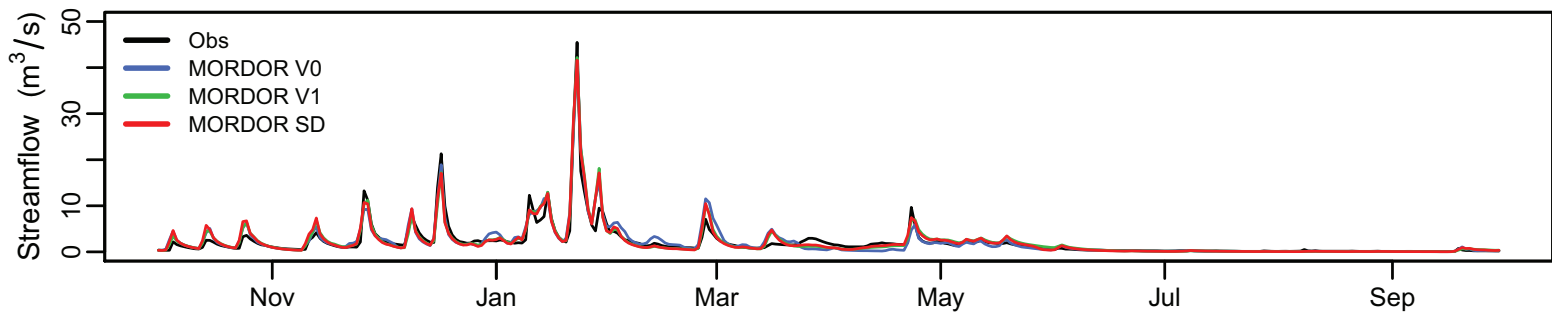

Year 1997

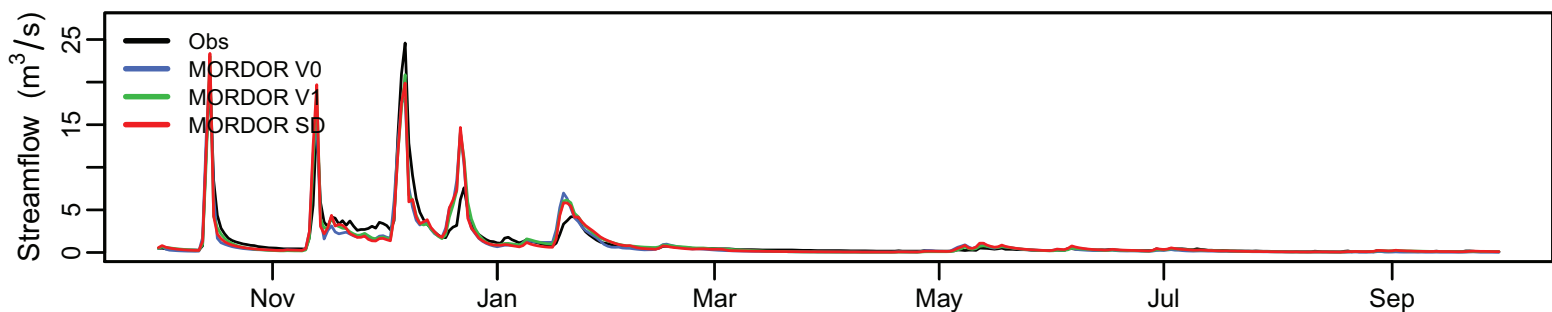



# Breze@Meyrueis

Year 1998

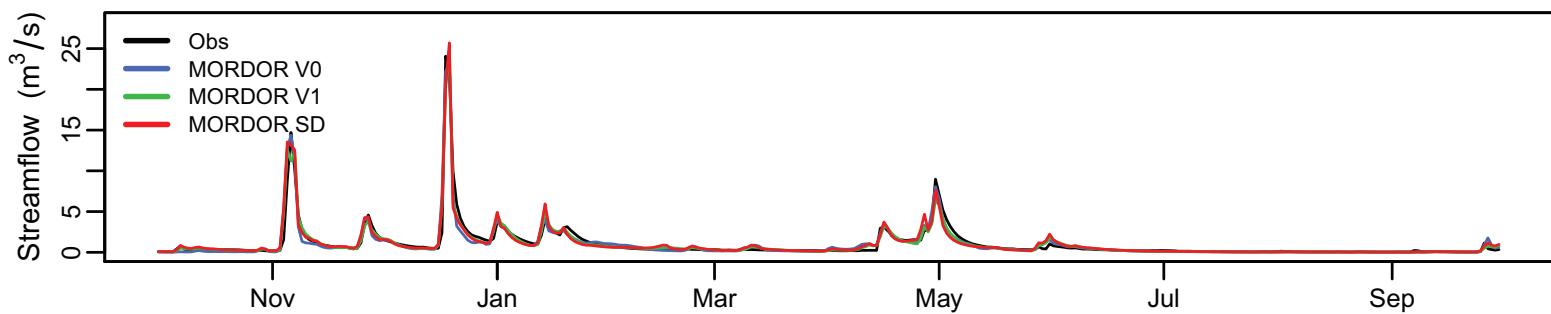

Year 1999

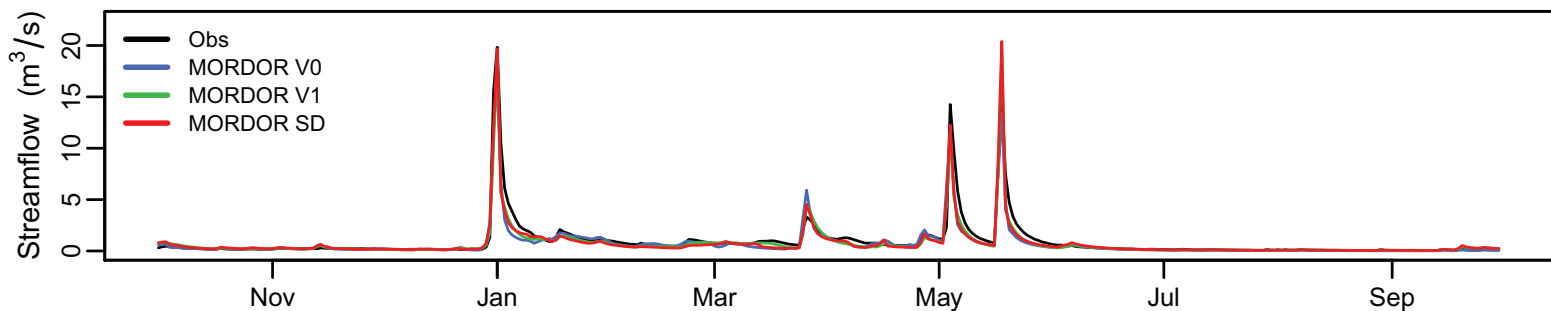

Year 2000

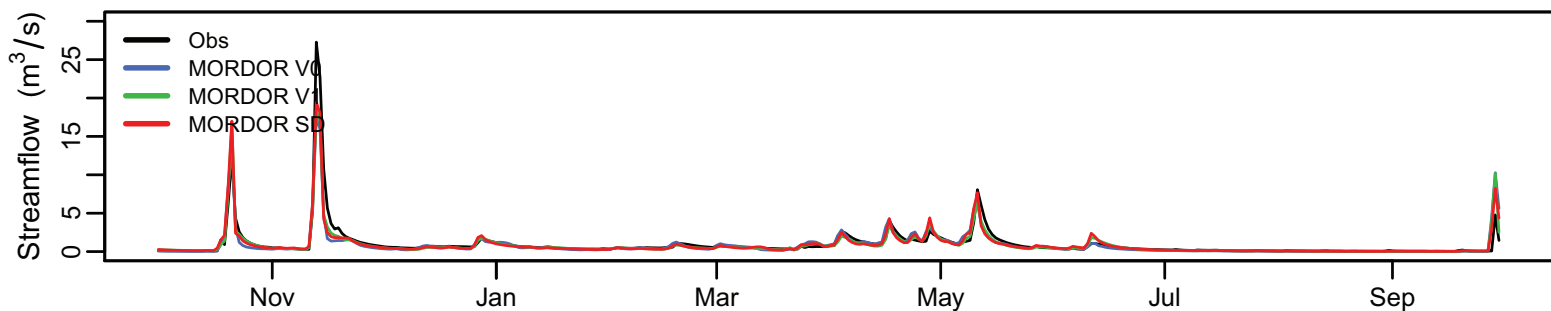

Year 2001

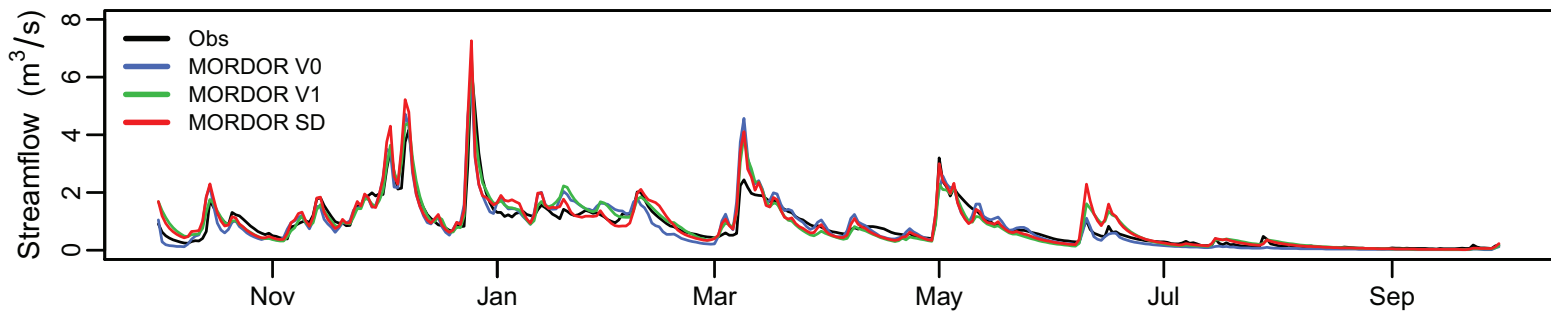

Year 2002

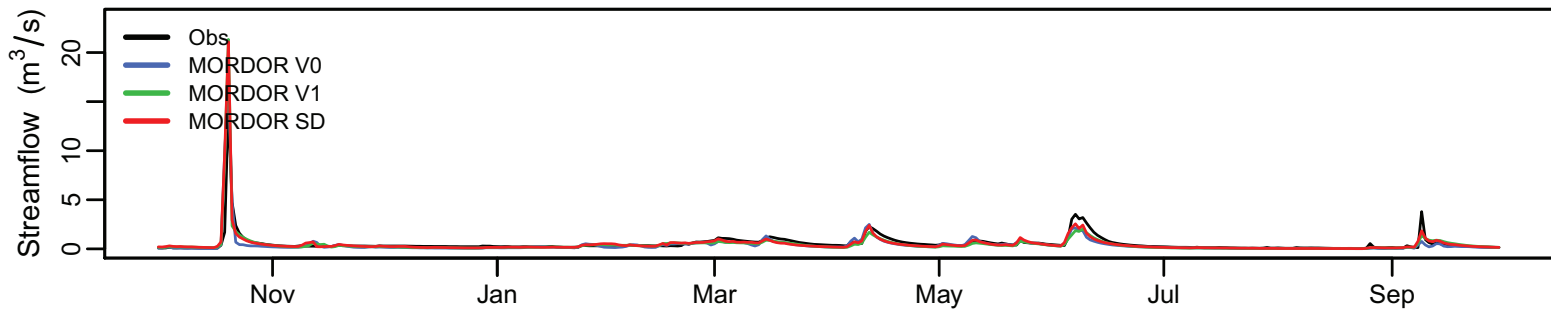

Year 2003

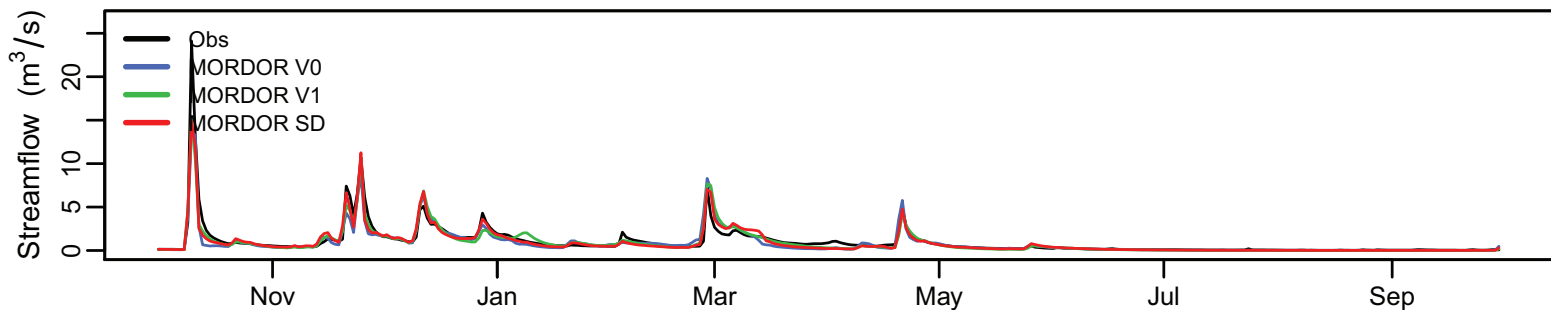

# Breze@Meyrueis

Year 2004

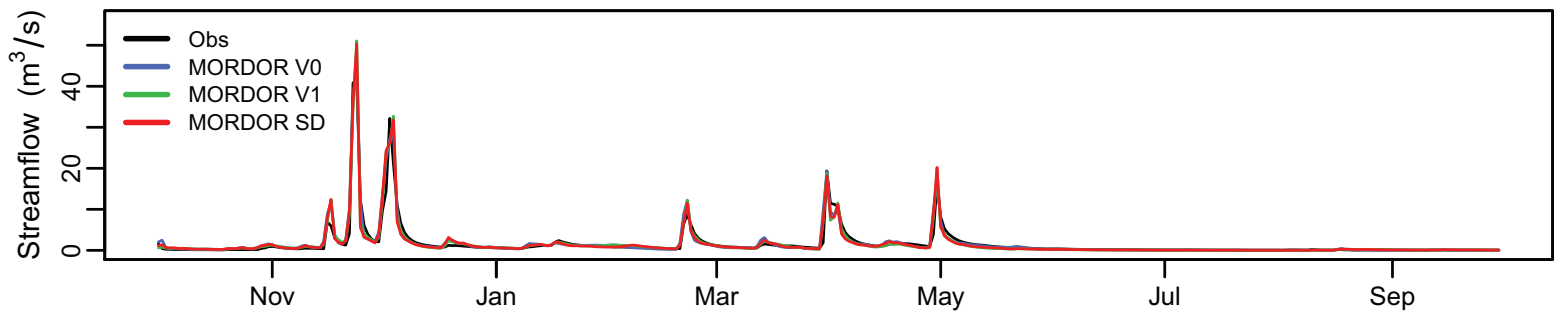

Year 2005

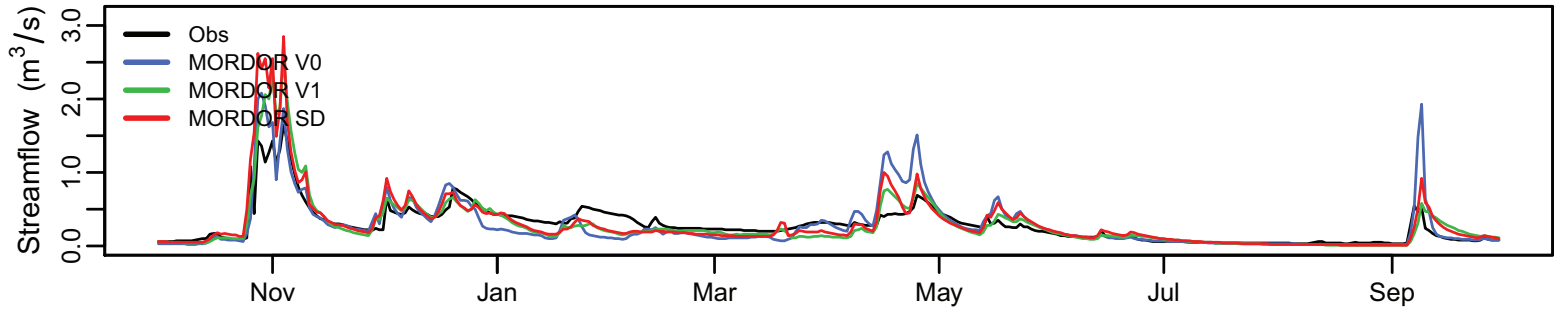

Year 2006

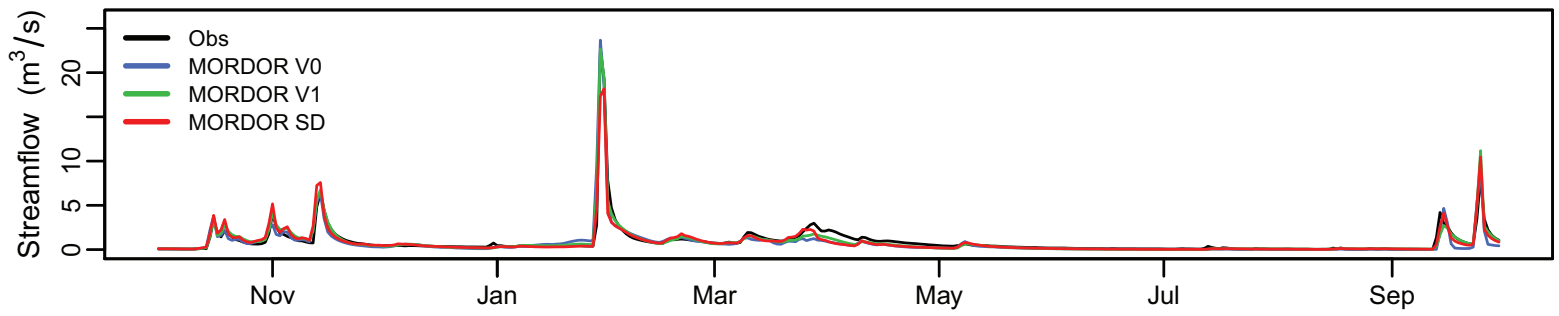

# Bromme@Brommat

Year 1990

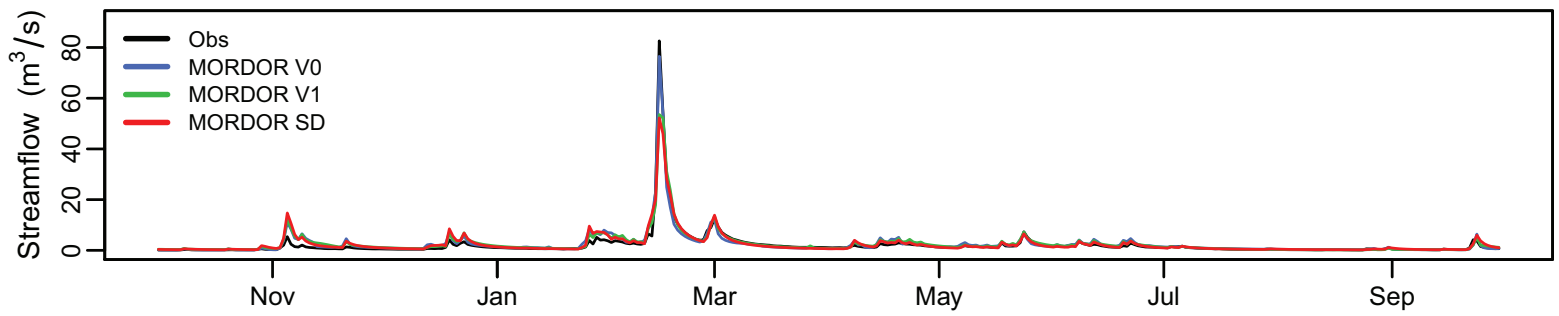

Year 1991

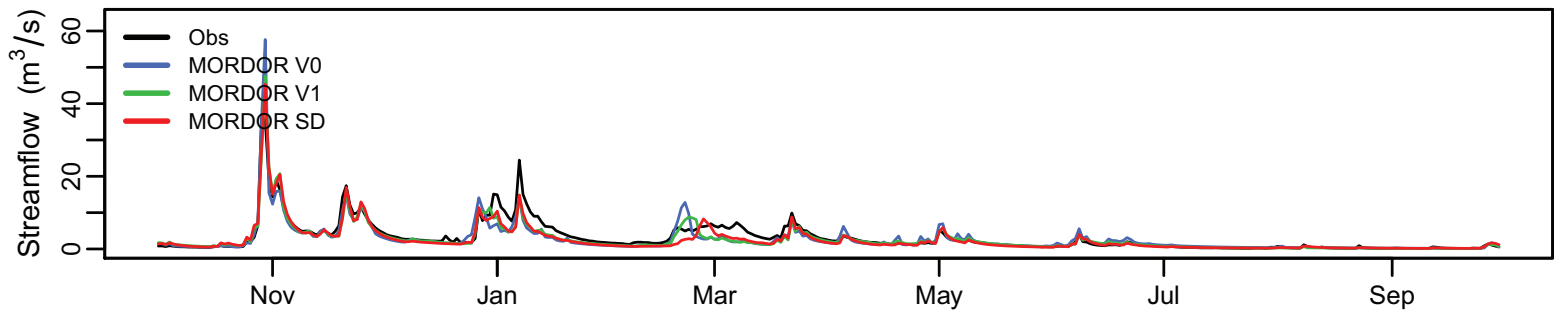

Year 1992

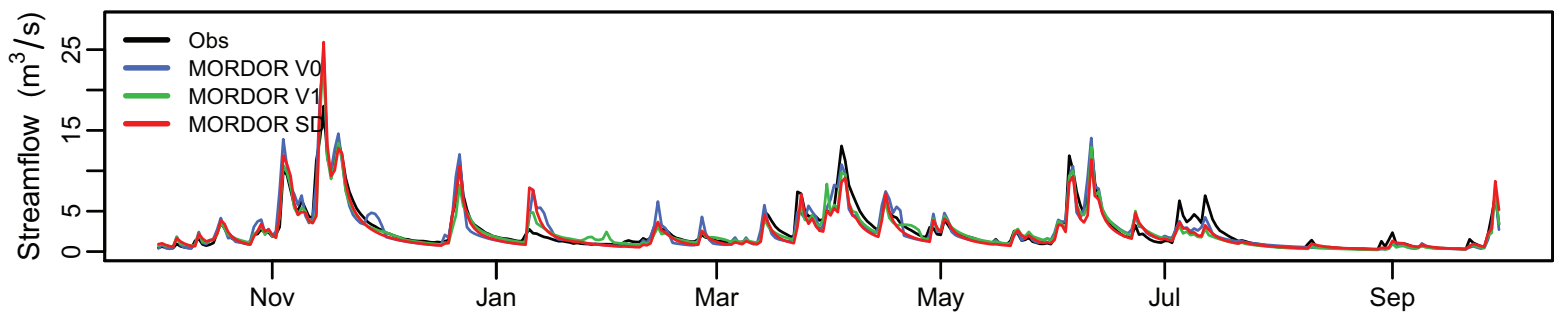

Year 1993

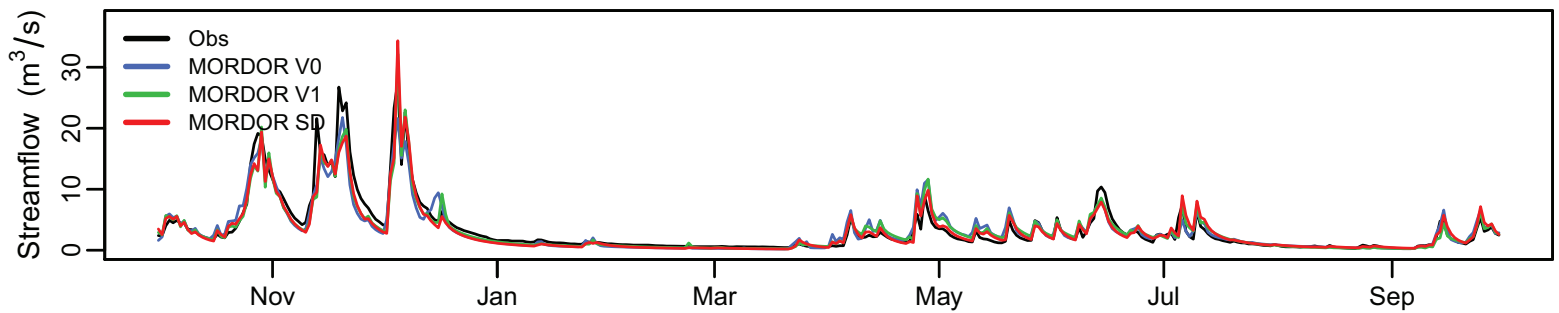

Year 1994

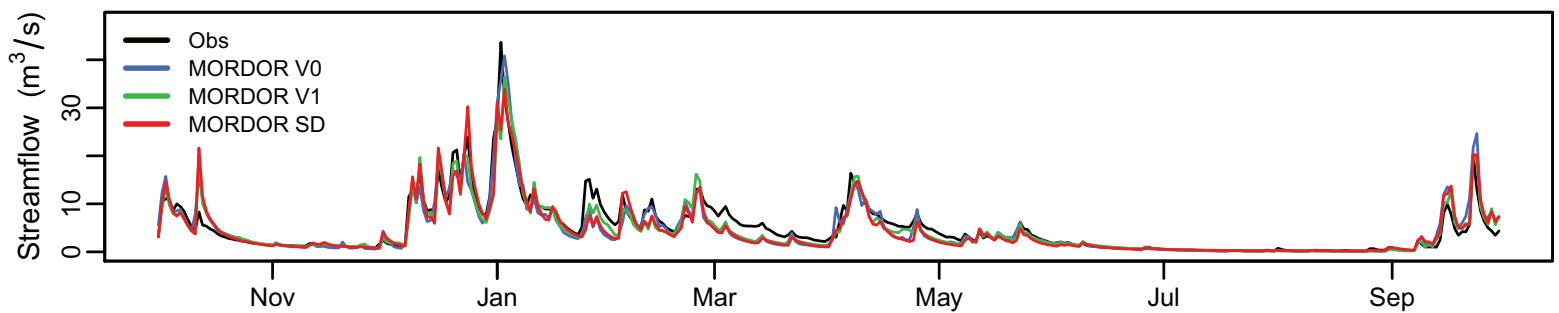

Year 1995

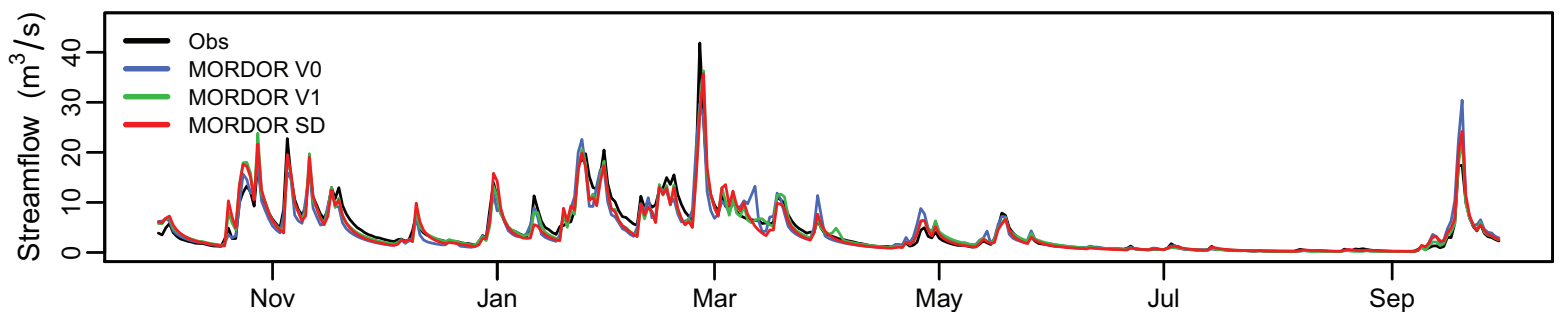

# Bromme@Brommat

Year 1996

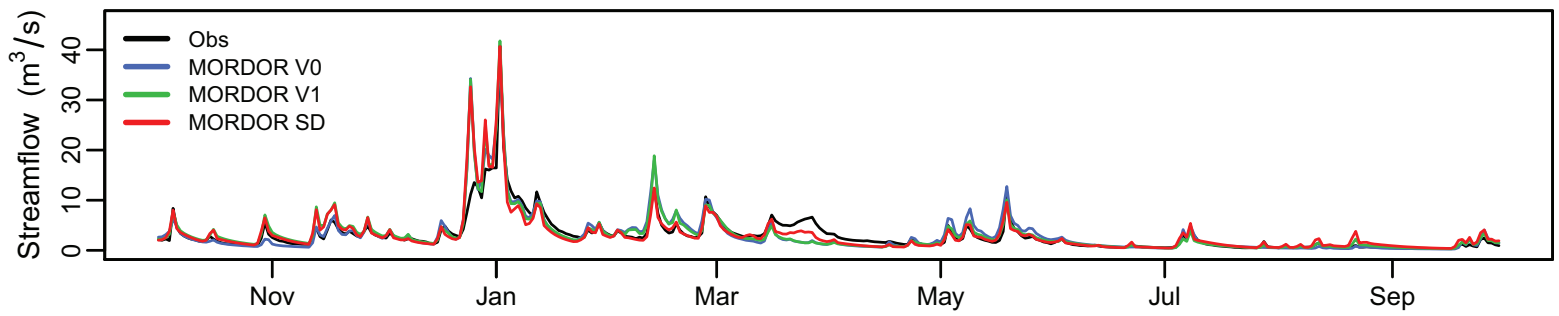

Year 1997

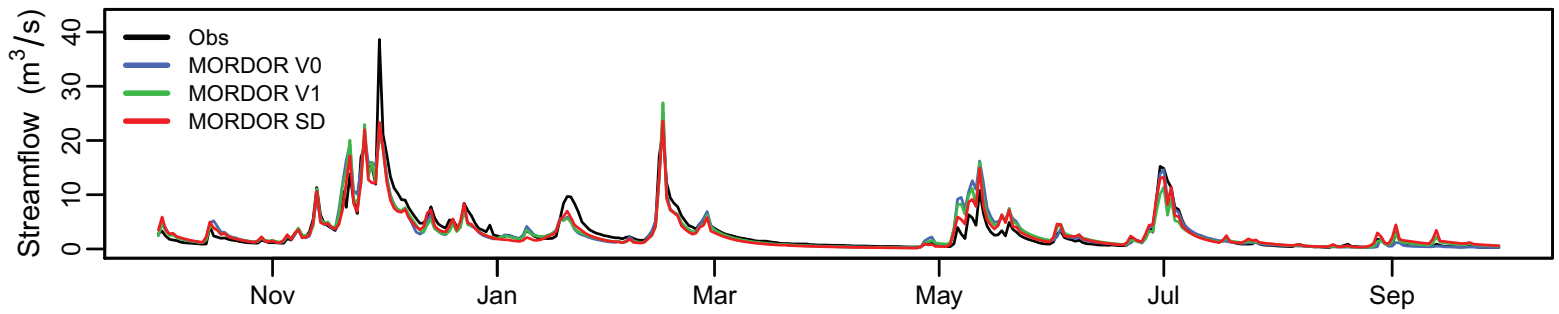

Year 1998

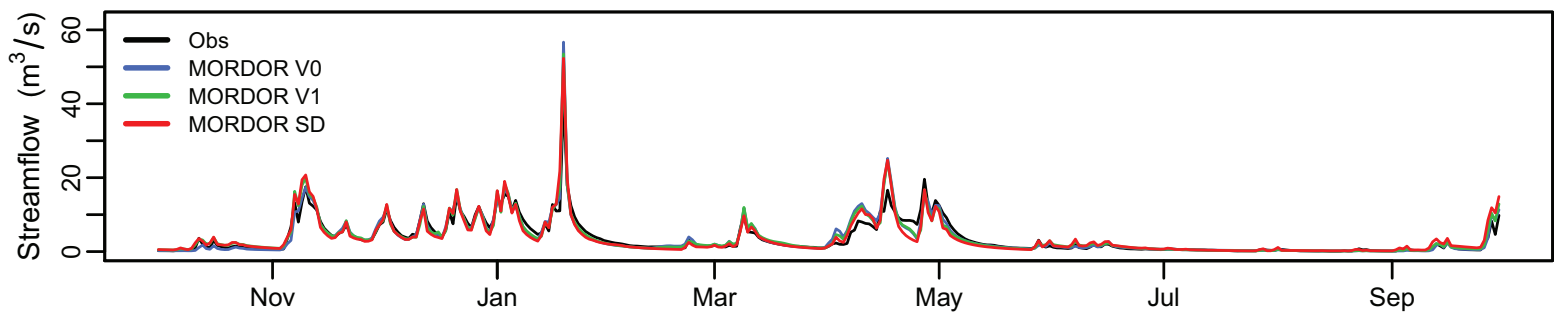

Year 1999

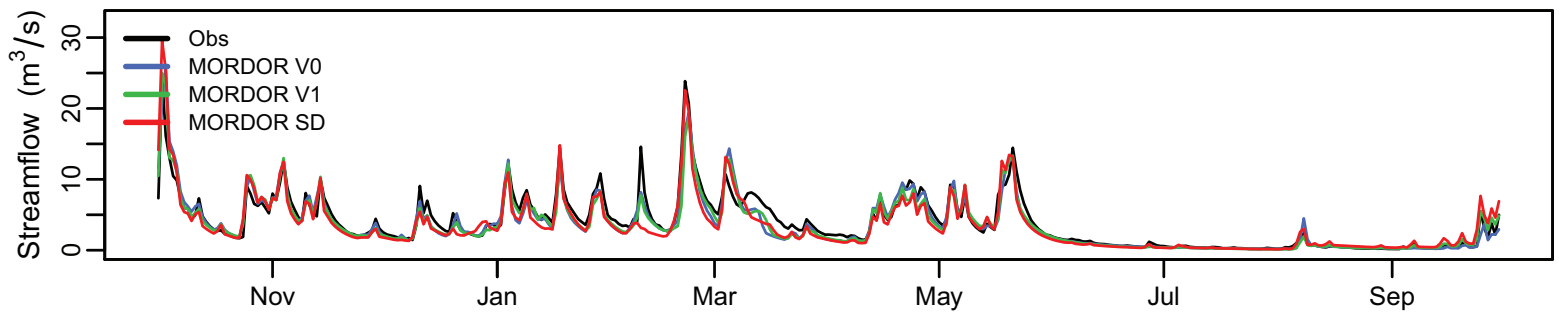

Year 2000

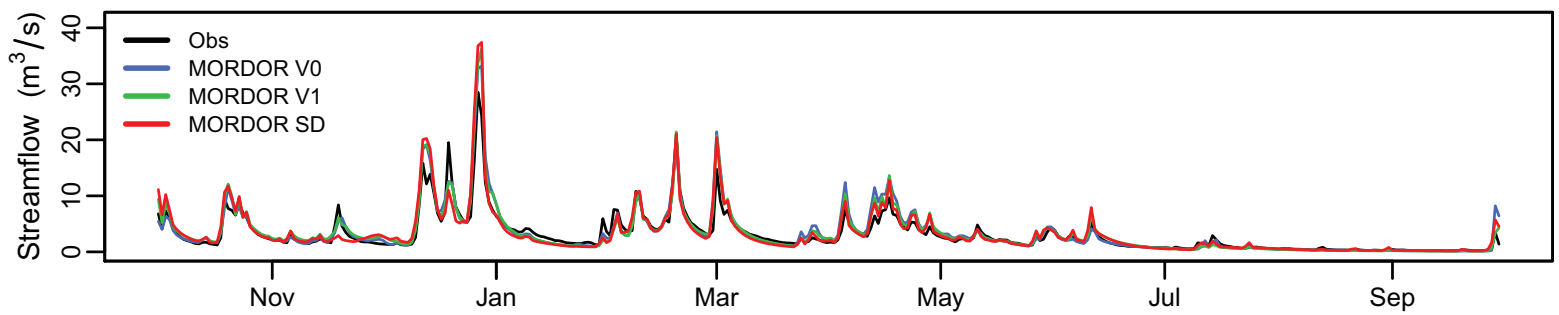

# Ceze@Bagnols

Year 1995

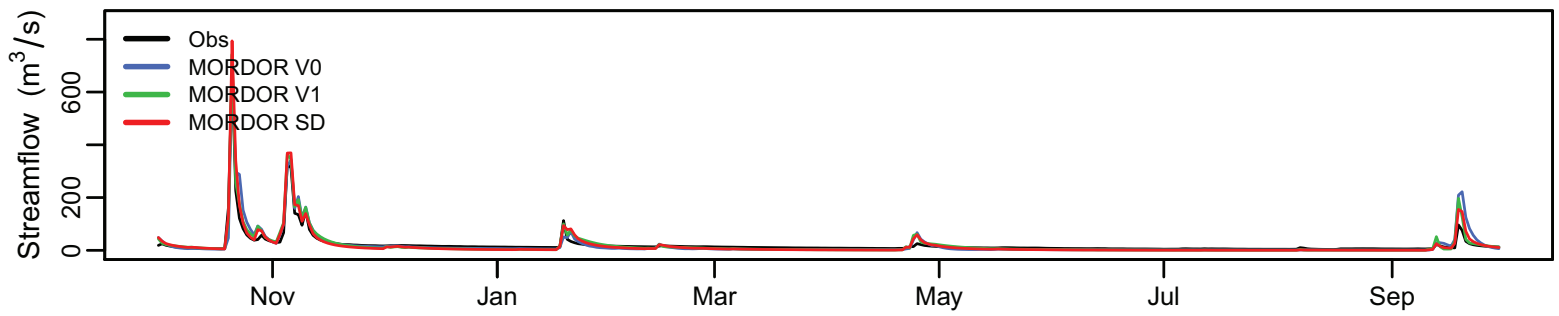

Year 1996

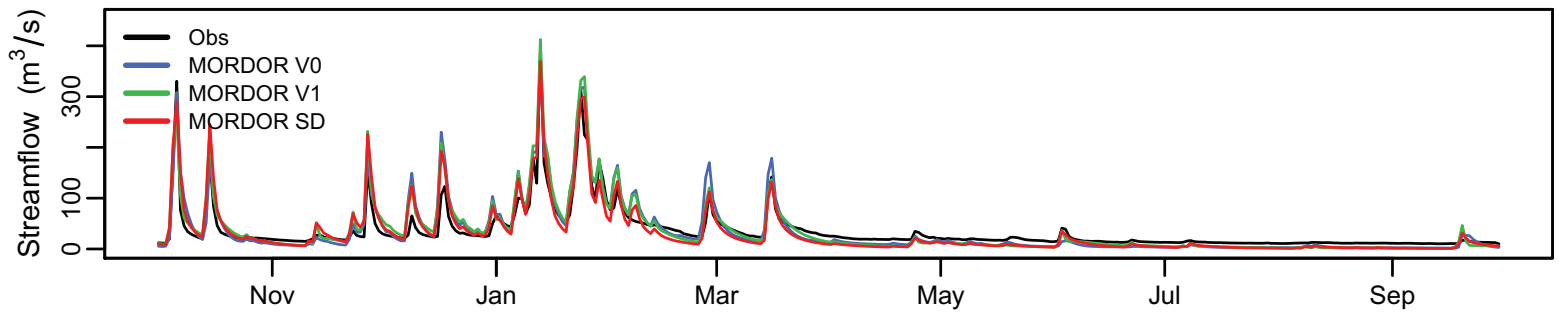

Year 1997

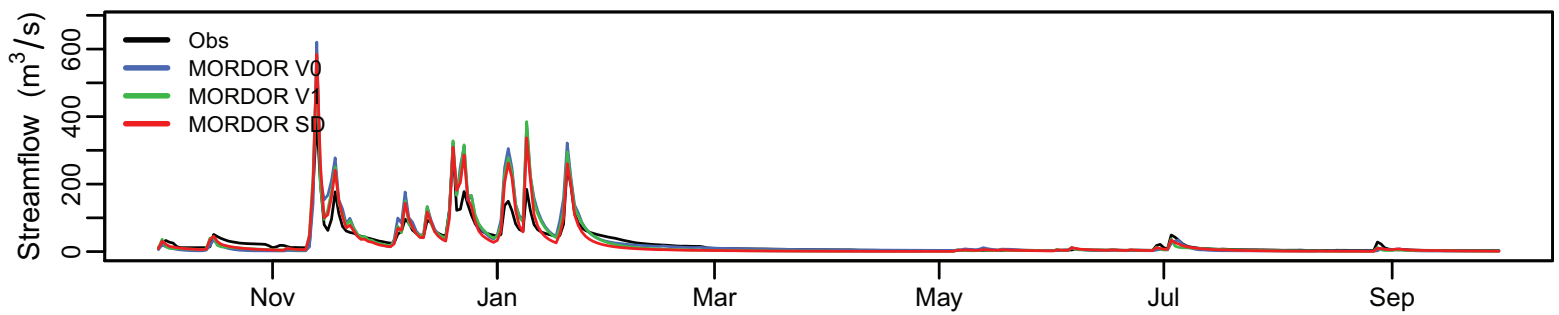

Year 1998

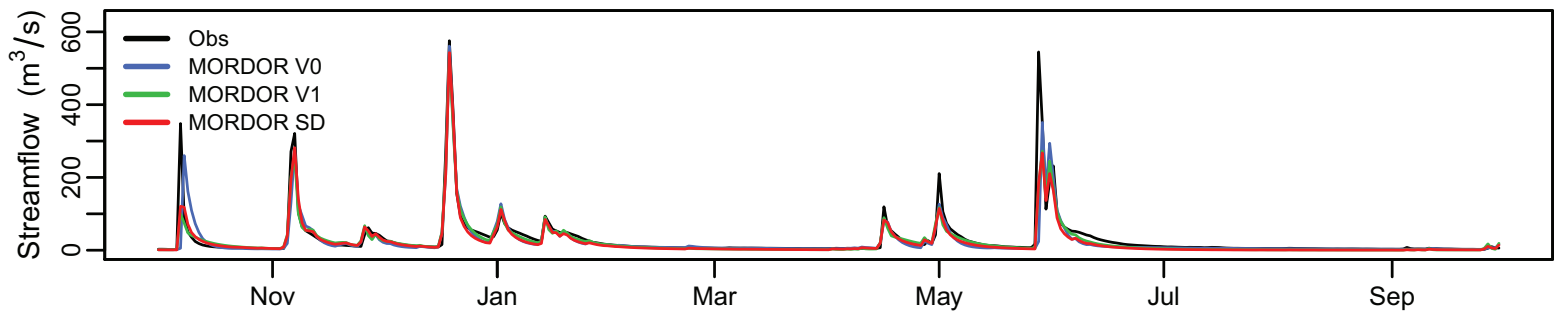

Year 1999

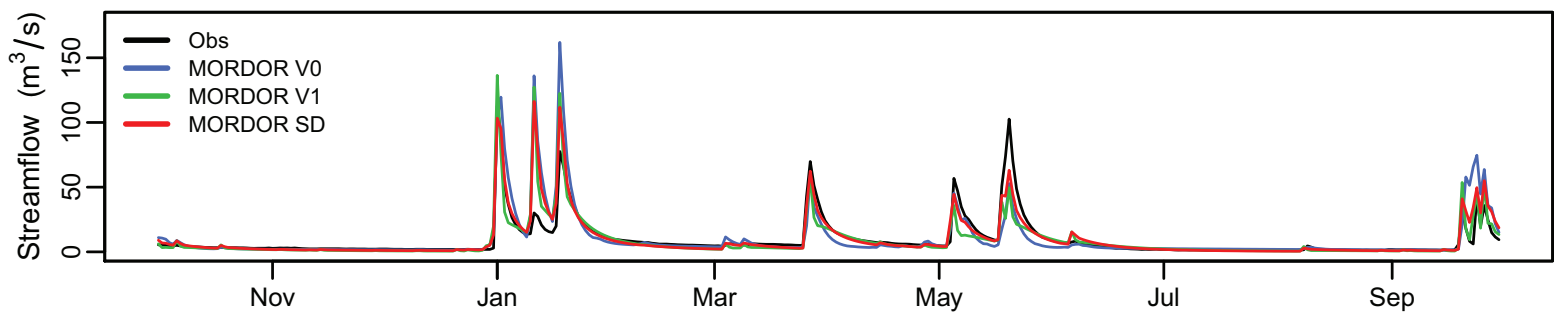

Year 2000

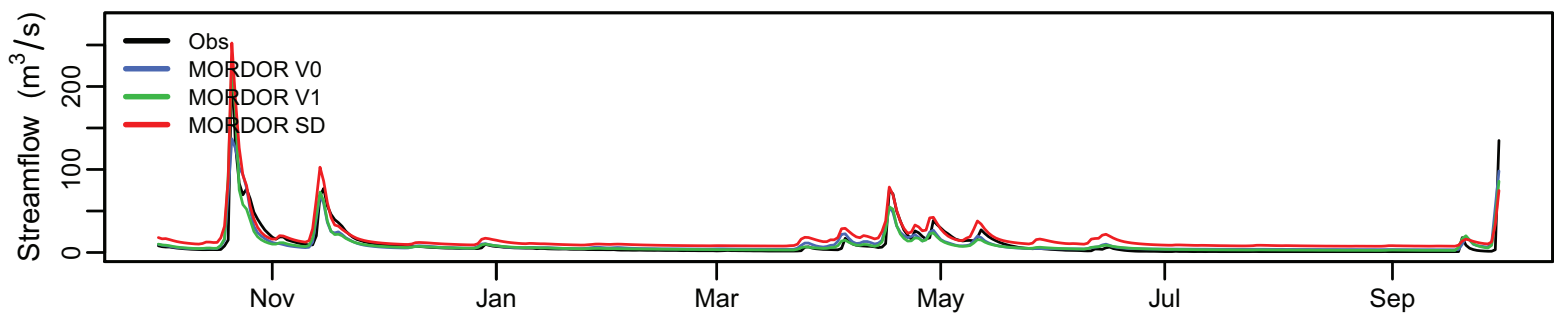

# Ceze@Bagnols

Year 2001

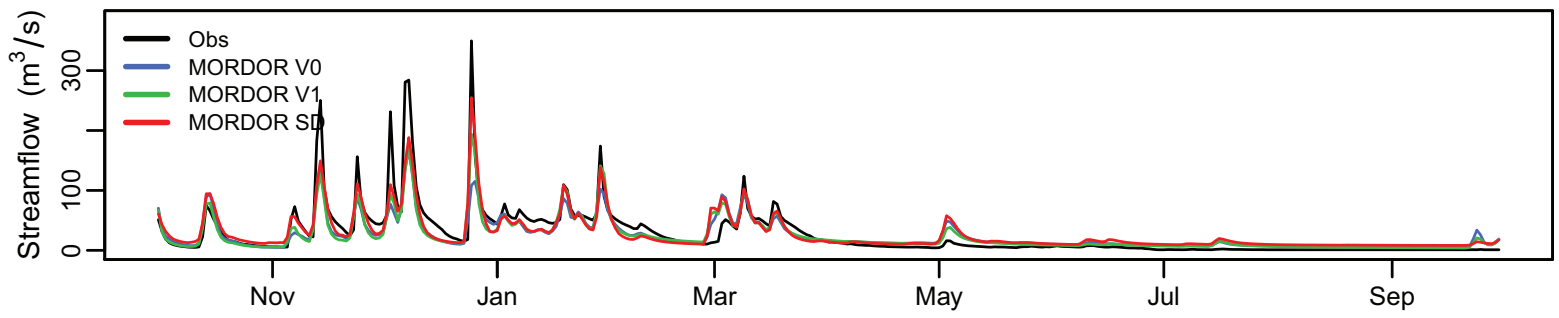

Year 2002

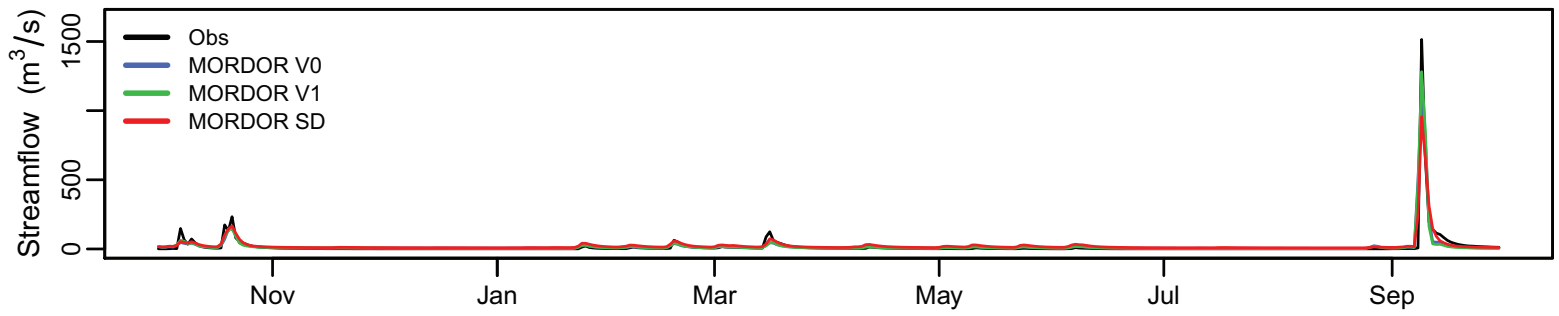

Year 2003

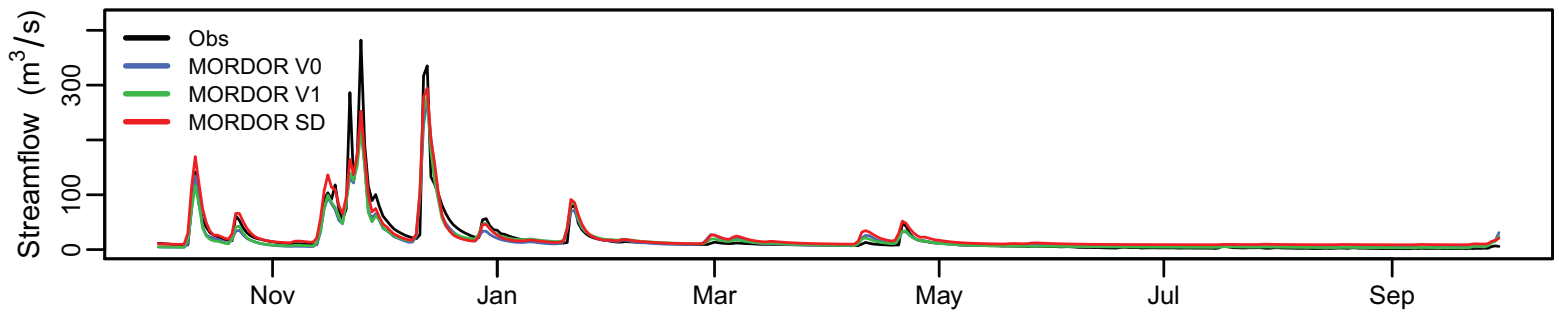

Year 2004

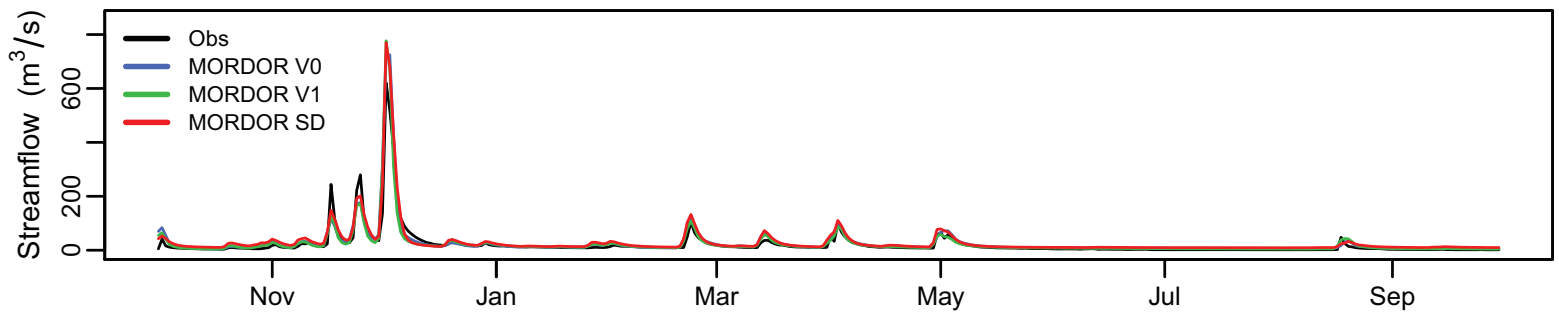

# Chassezac@SteMarguerite

Year 1969

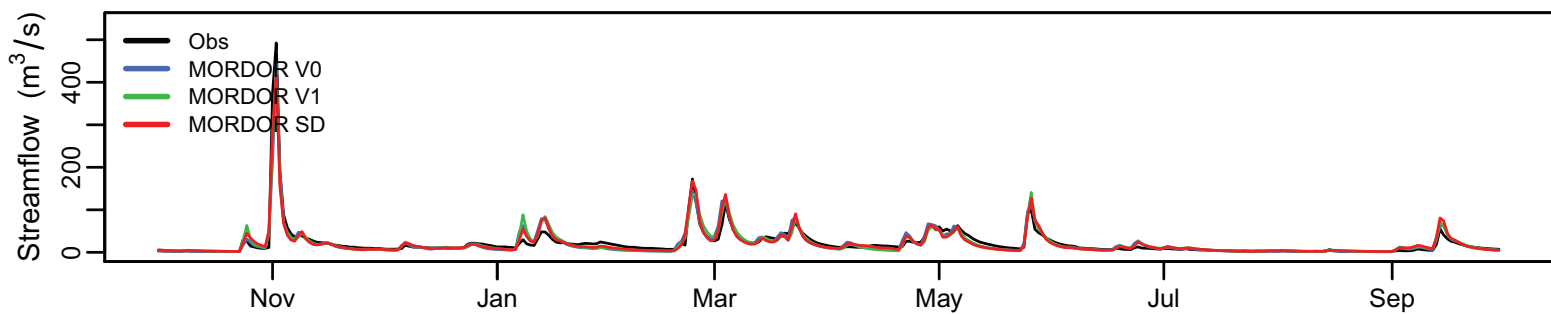

Year 1970

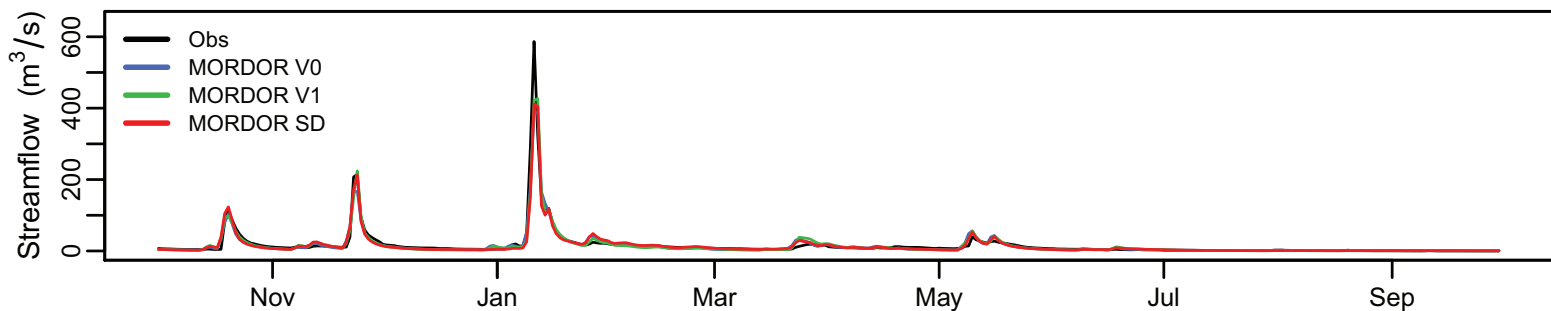

Year 1971

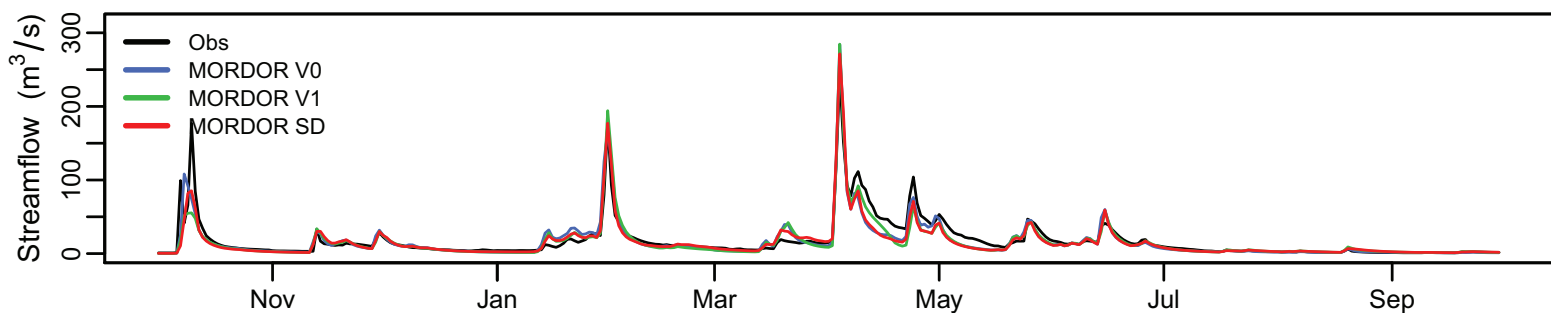

Year 1972

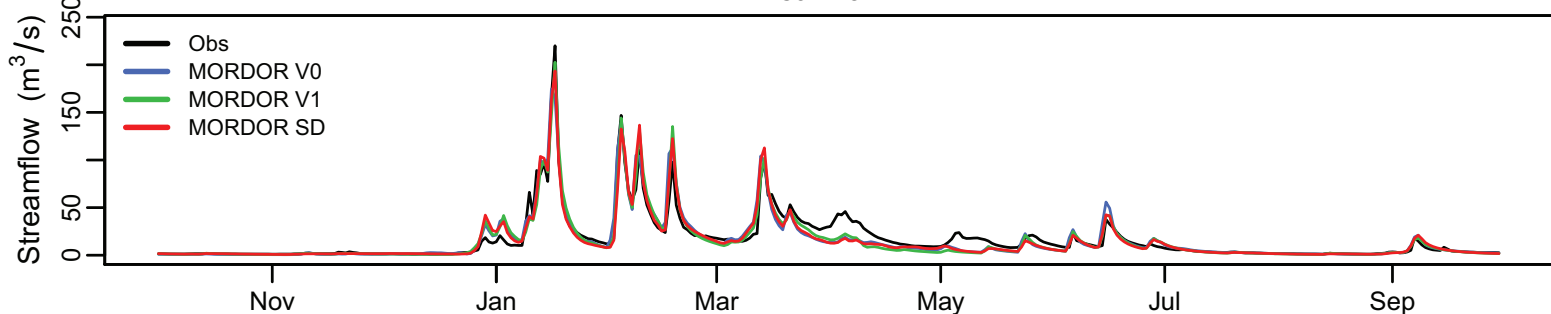

Year 1973

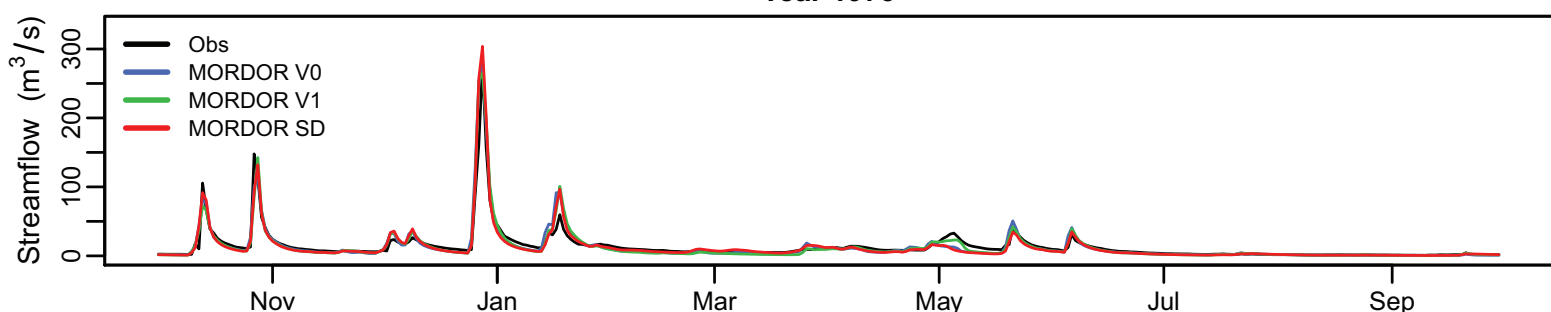

Year 1974

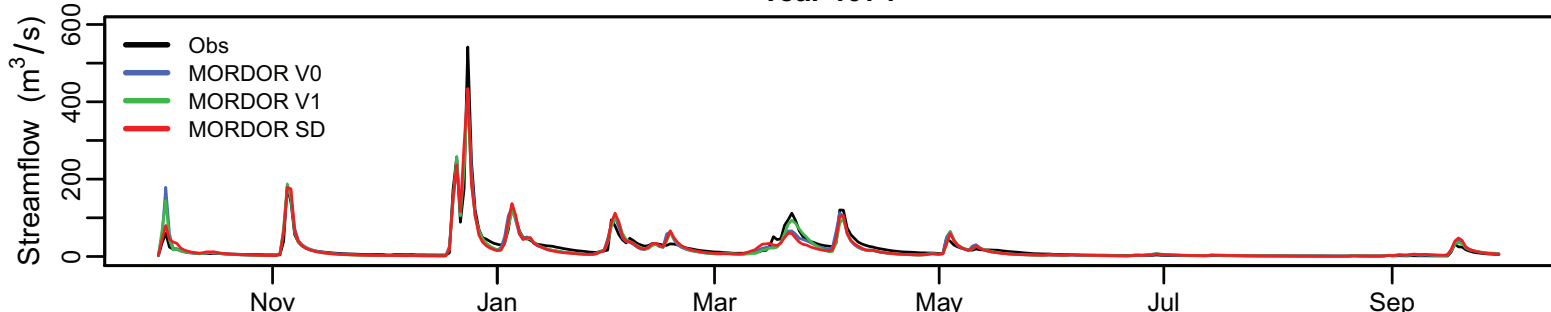

# Chassezac@SteMarguerite

Year 1975

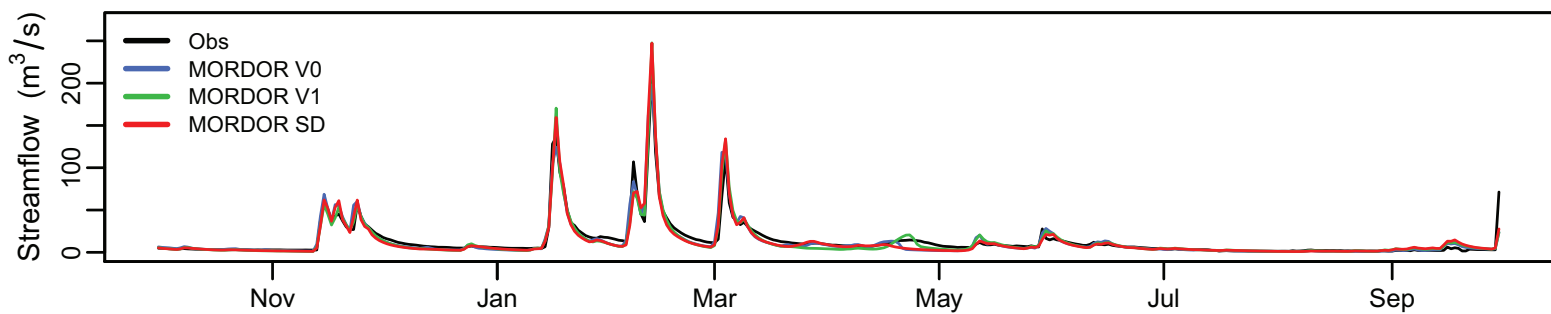

Year 1976

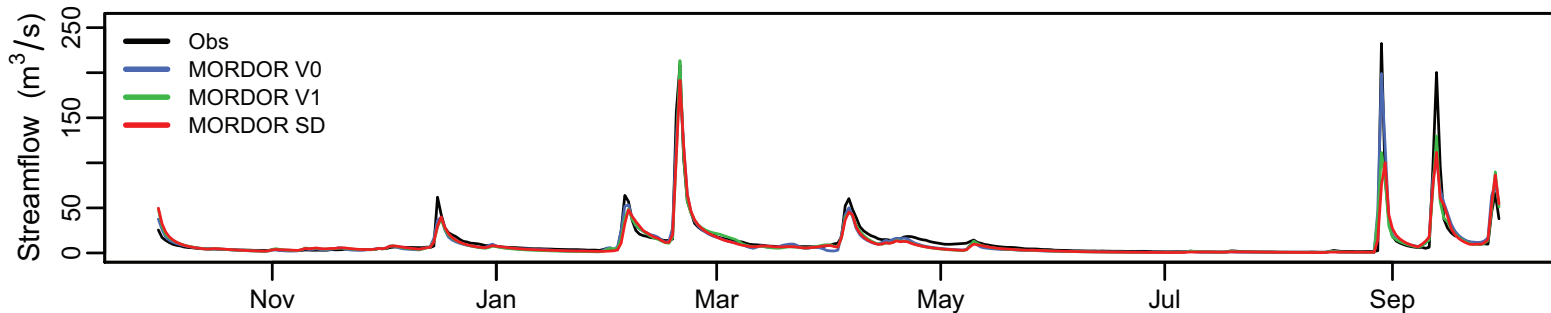

Year 1977

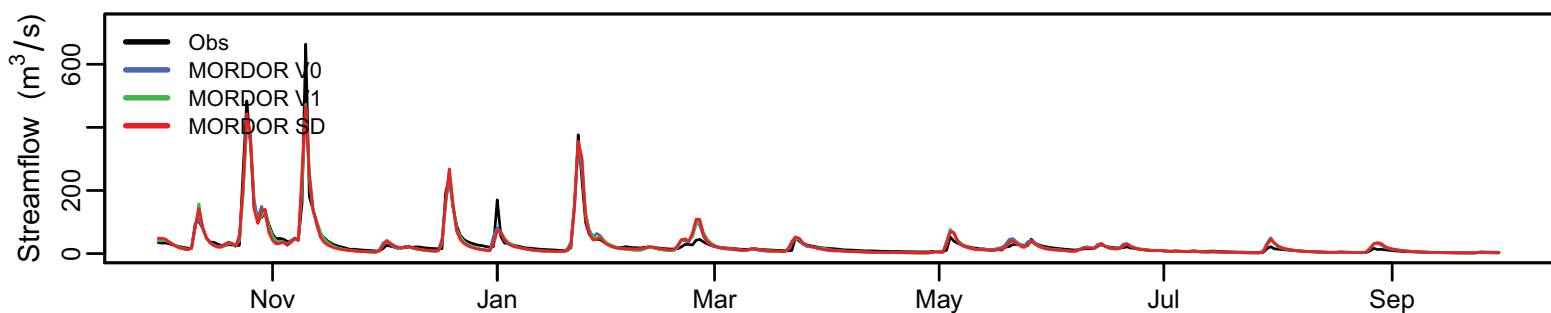

Year 1978

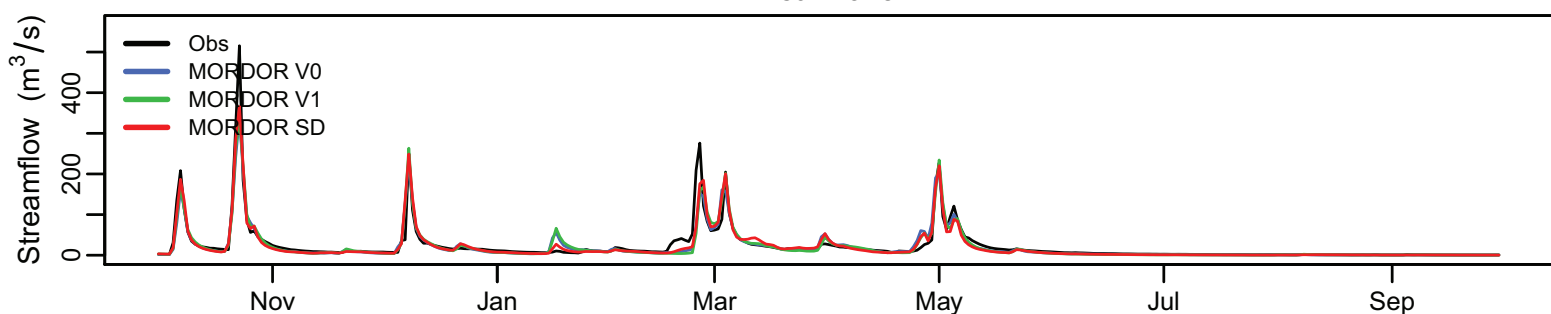

Year 1979

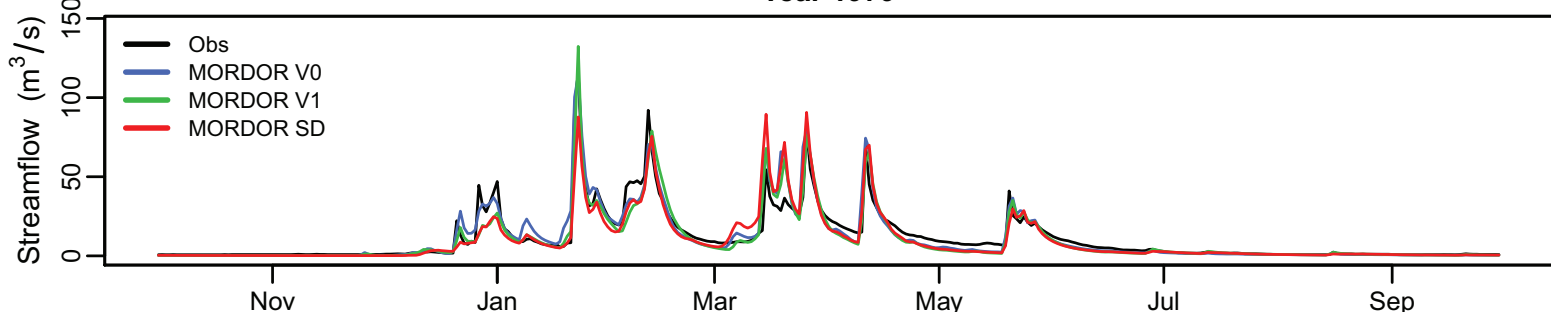

Year 1980

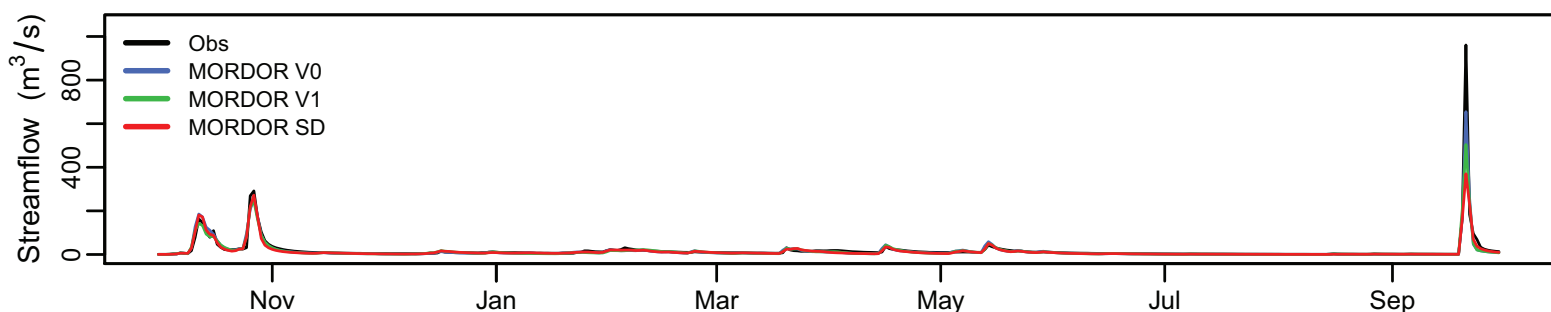



# Chassezac@SteMarguerite

Year 1981

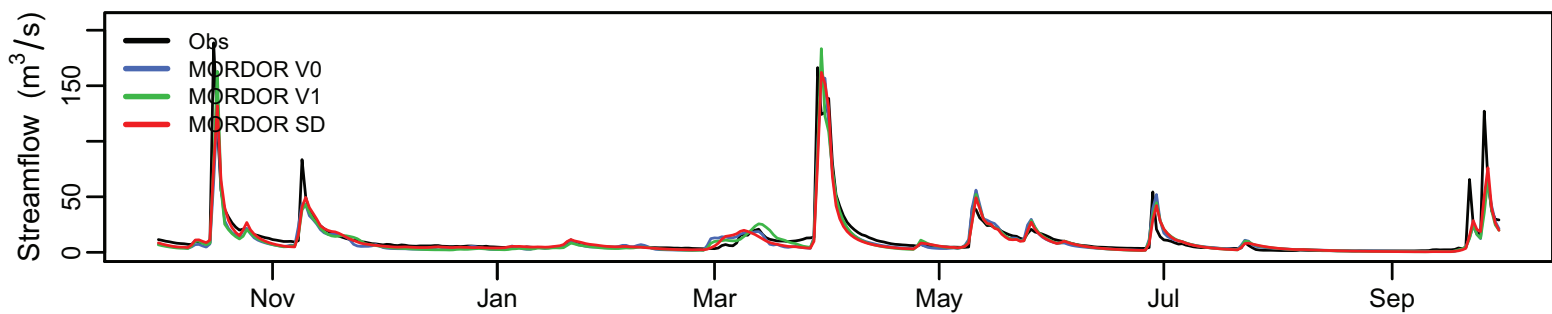

Year 1982

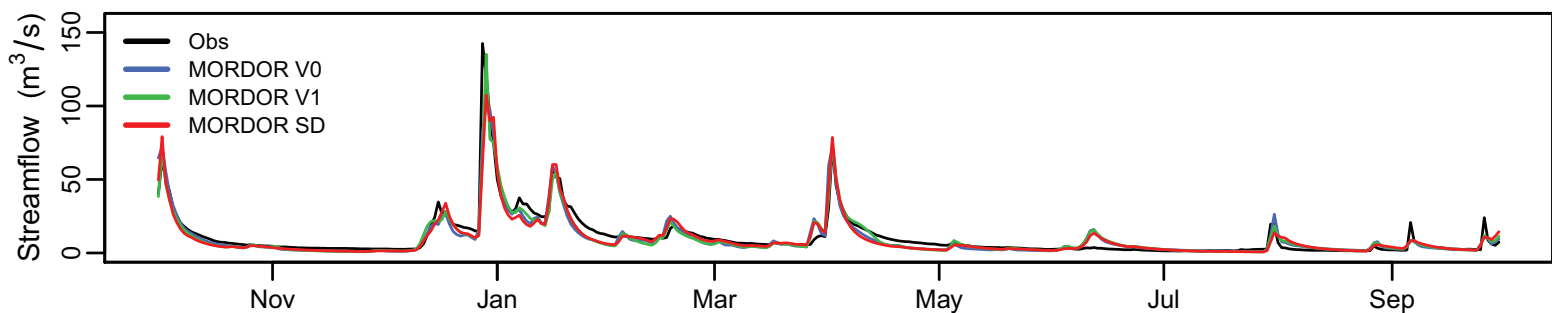

Year 1983

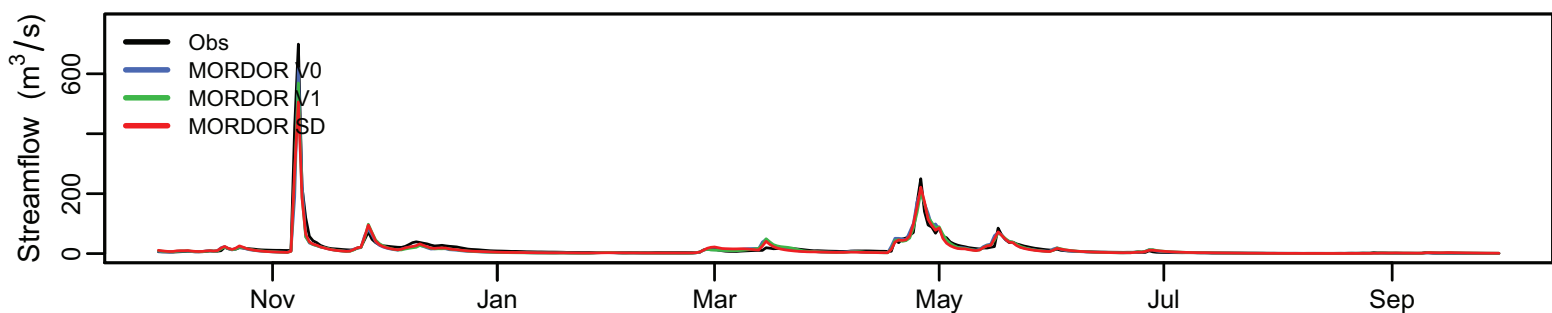

Year 1984

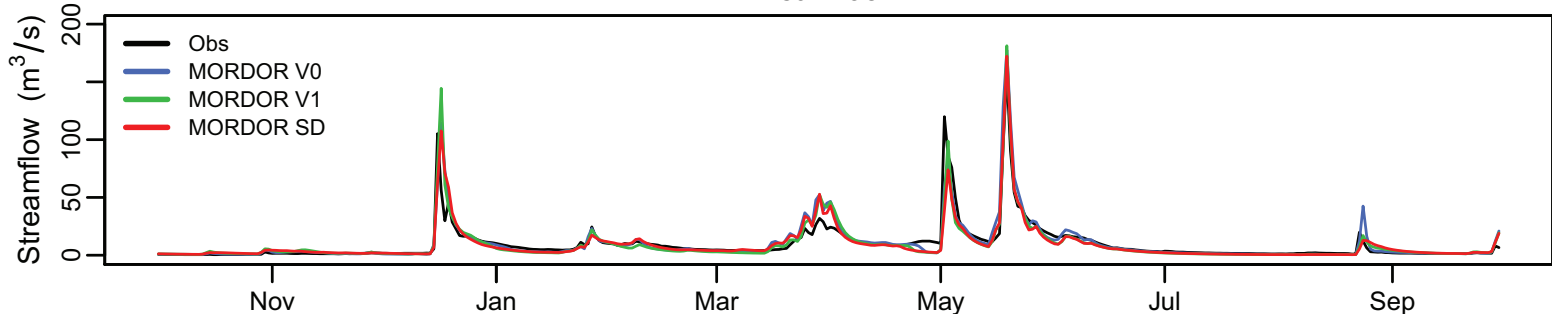

Year 1985

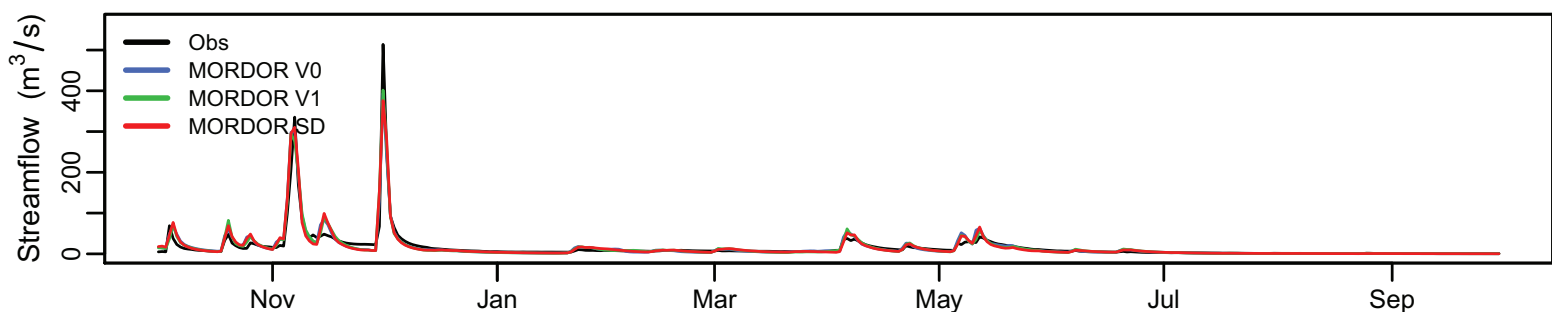

Year 1986

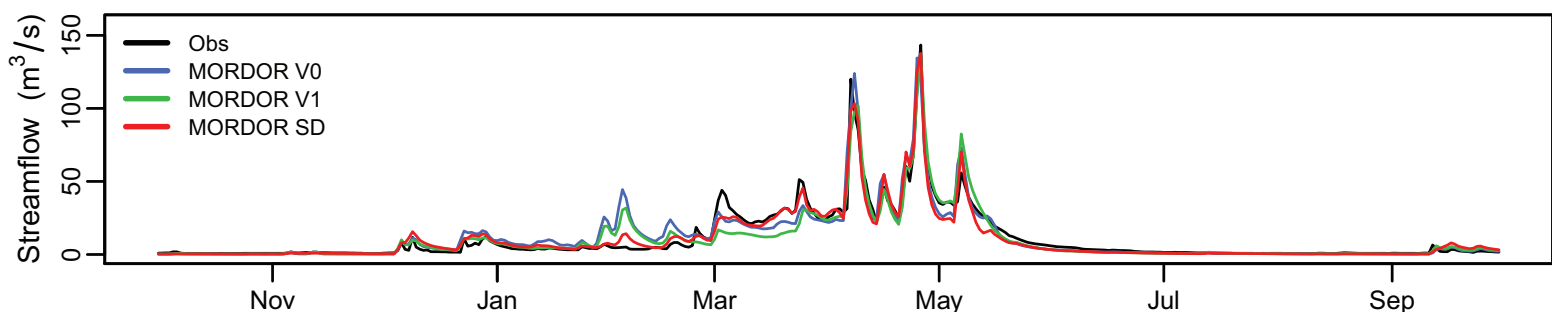

# Chassezac@SteMarguerite

Year 1987

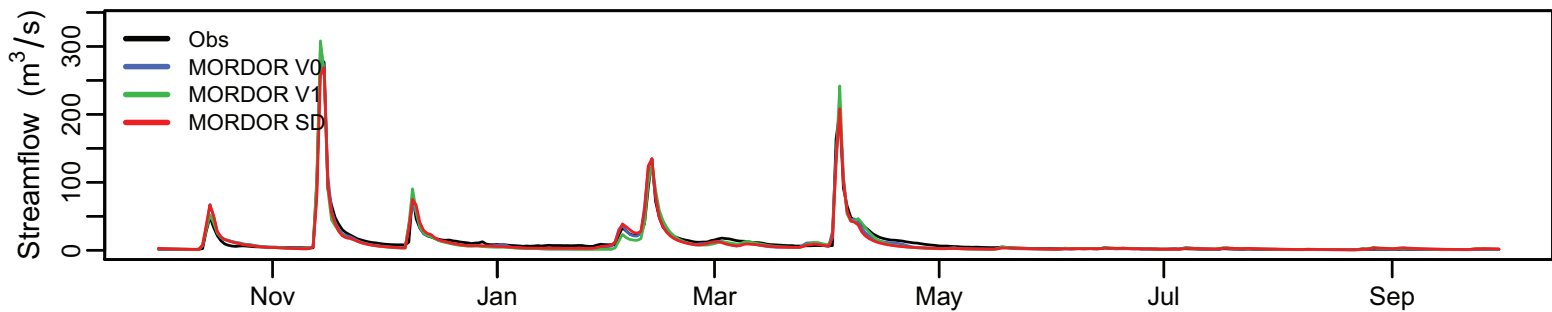

Year 1988

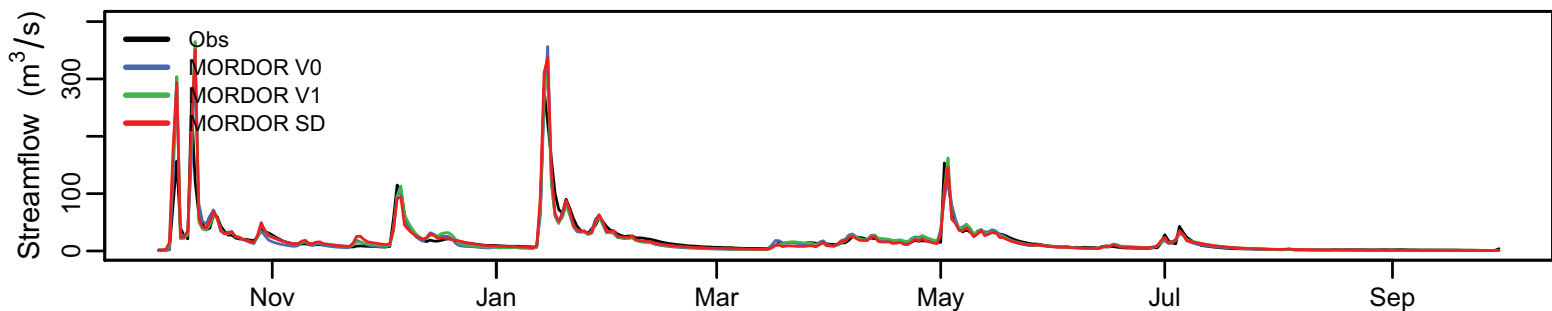

Year 1989

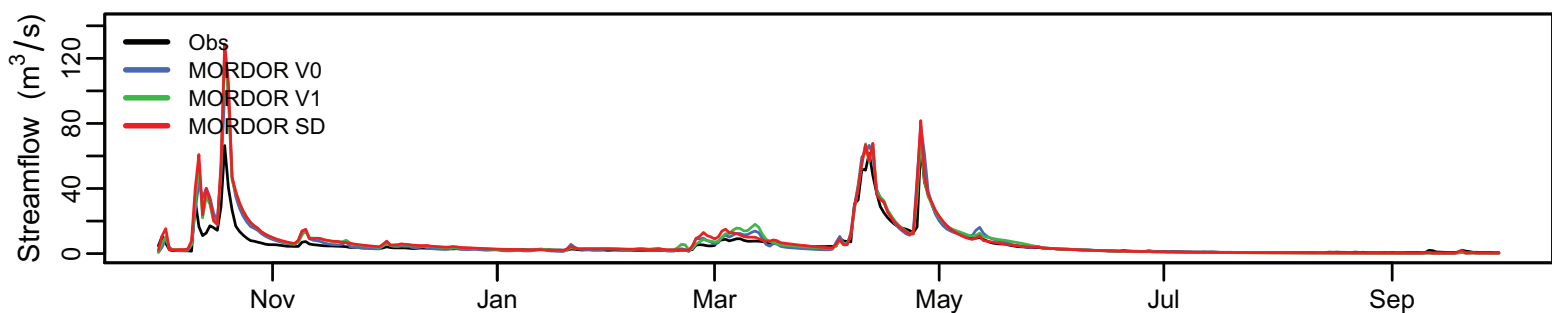

Year 1990

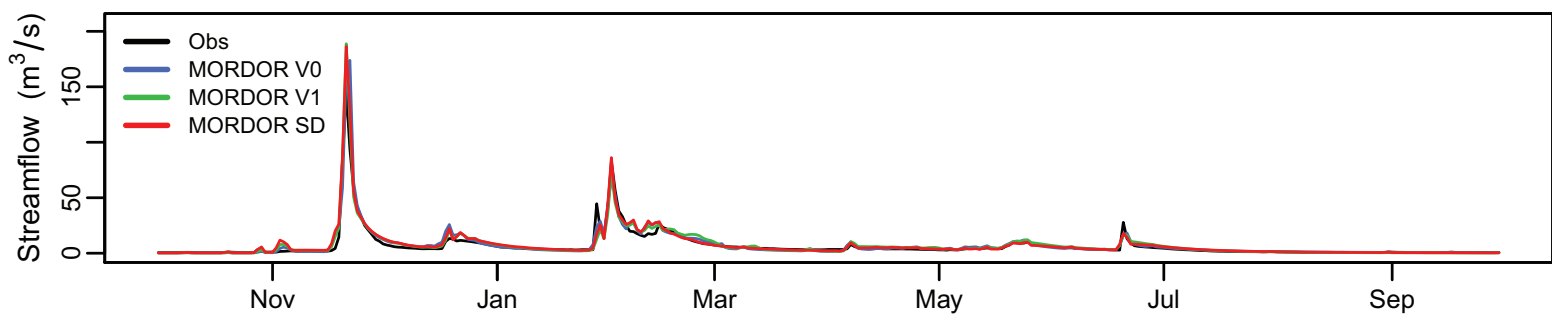

Year 1991

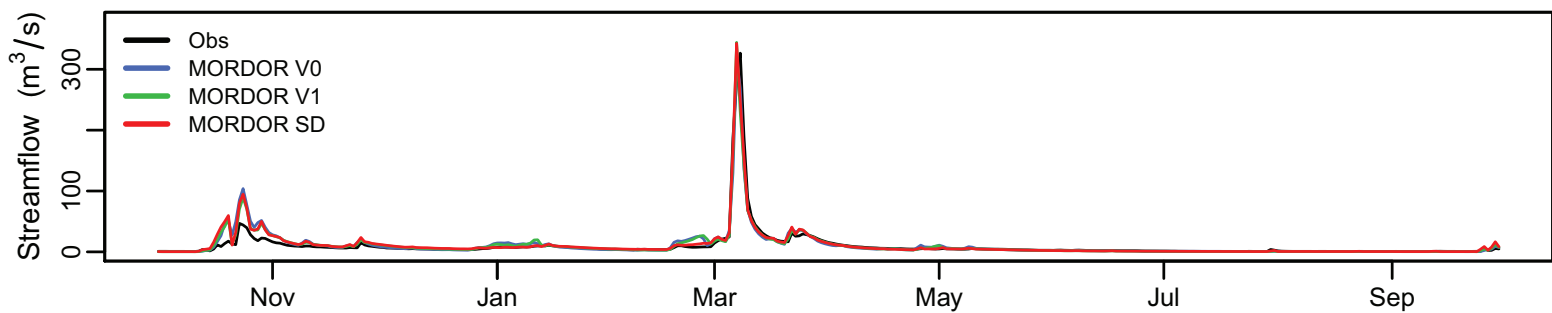

Year 1992

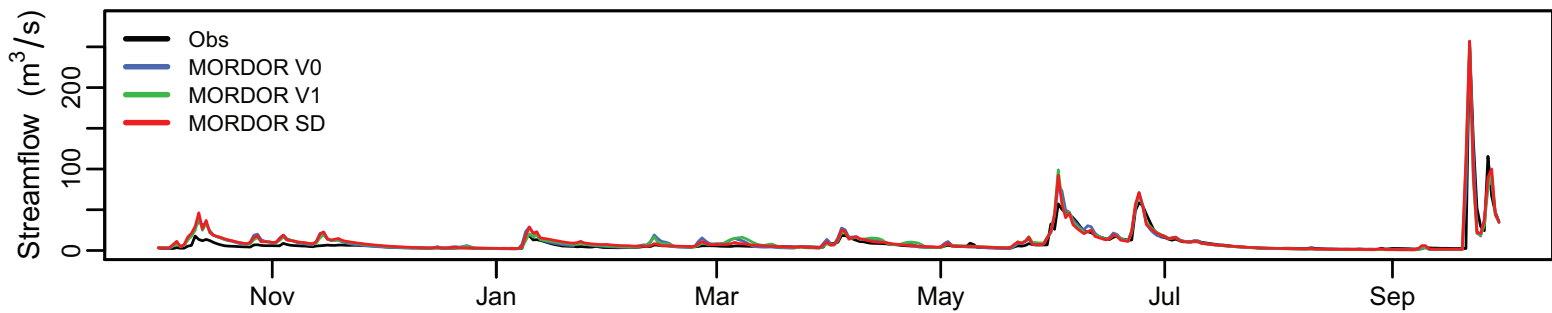

# Chassezac@SteMarguerite

Year 1993

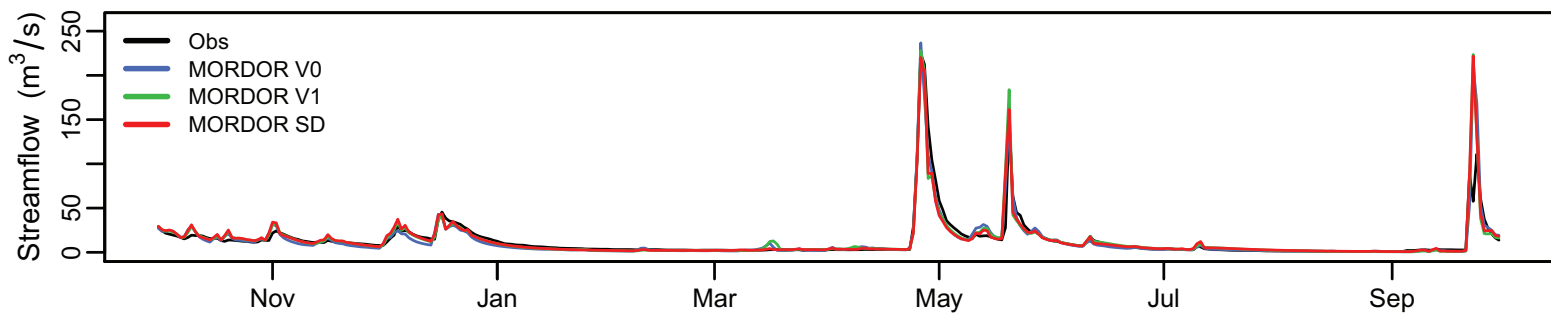

Year 1994

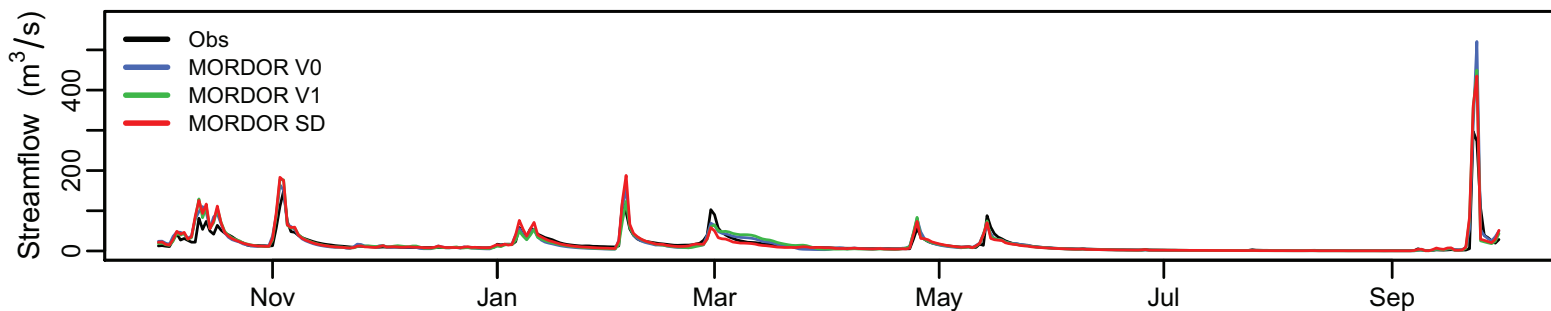

Year 1995

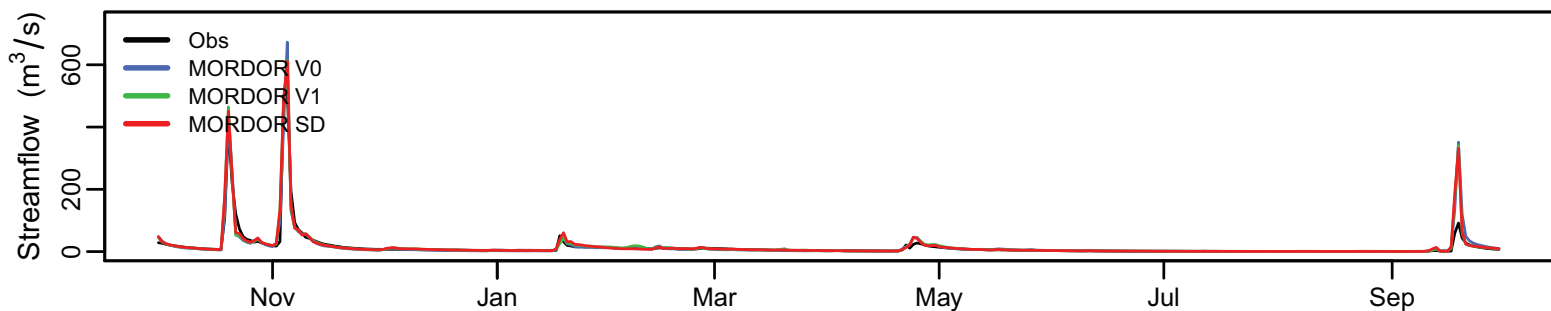

Year 1996

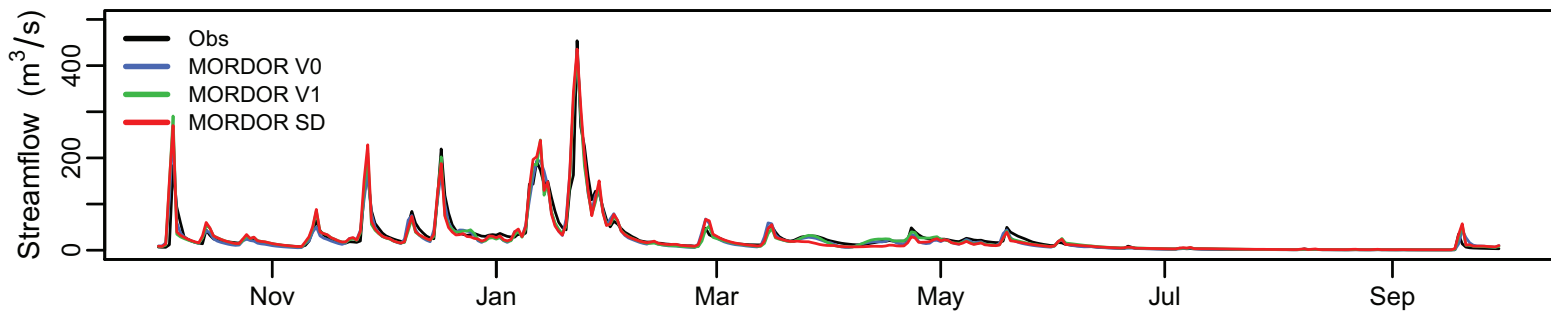

Year 1997

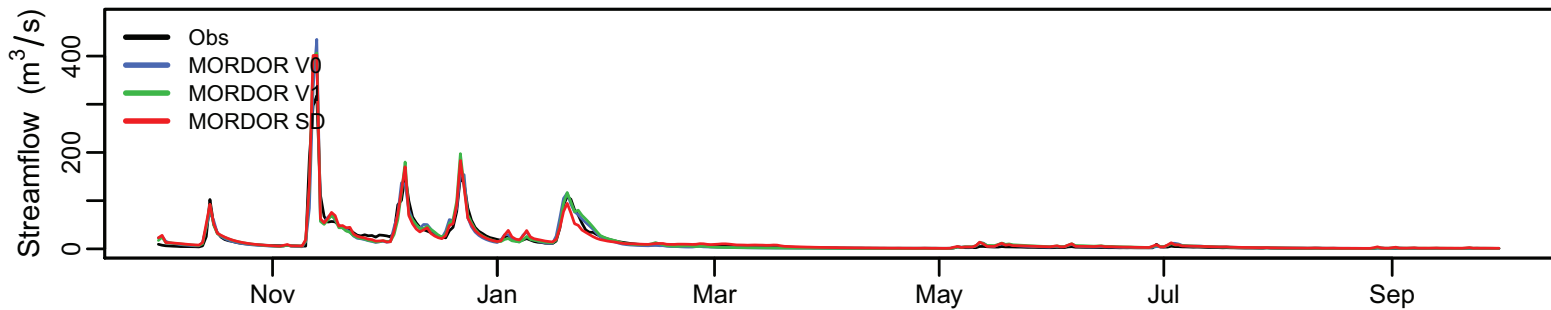

Year 1998

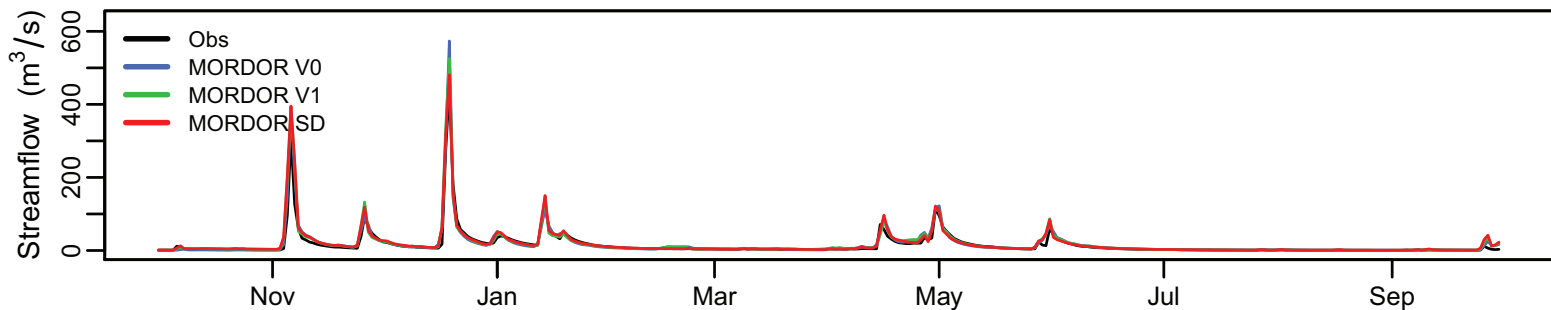

# Chassezac@SteMarguerite

Year 1999

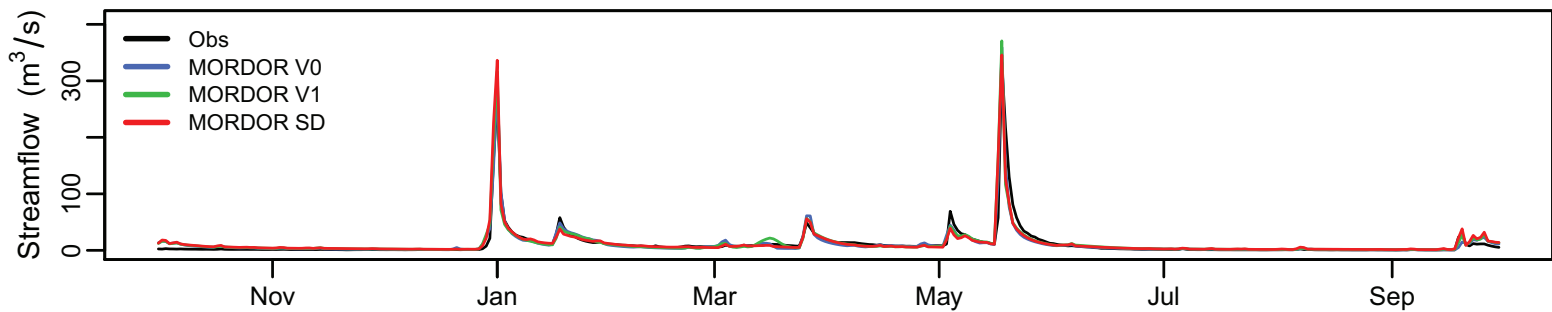

Year 2000

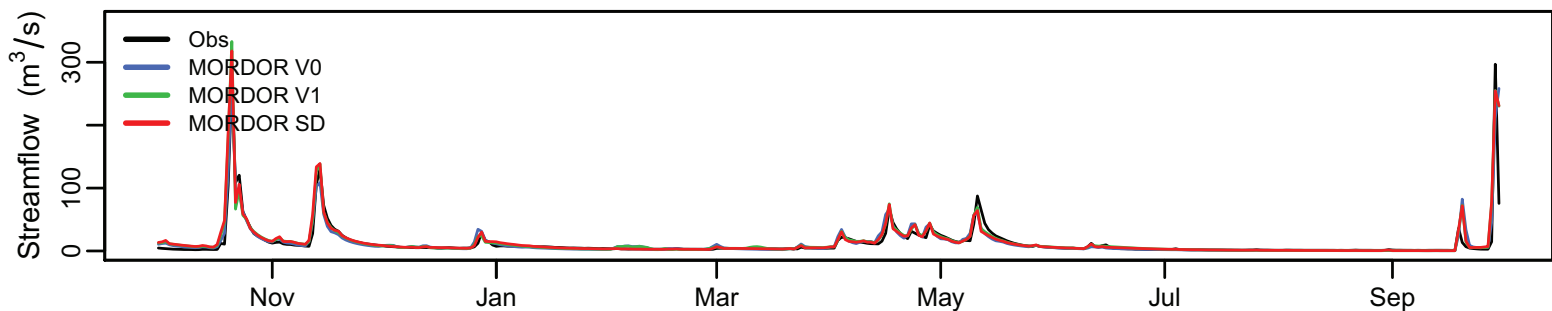

Year 2001

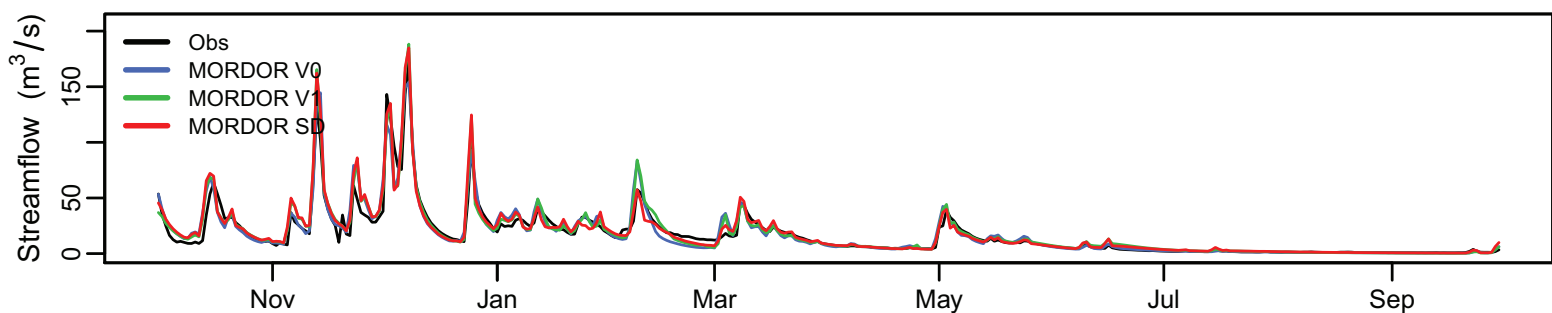

Year 2002

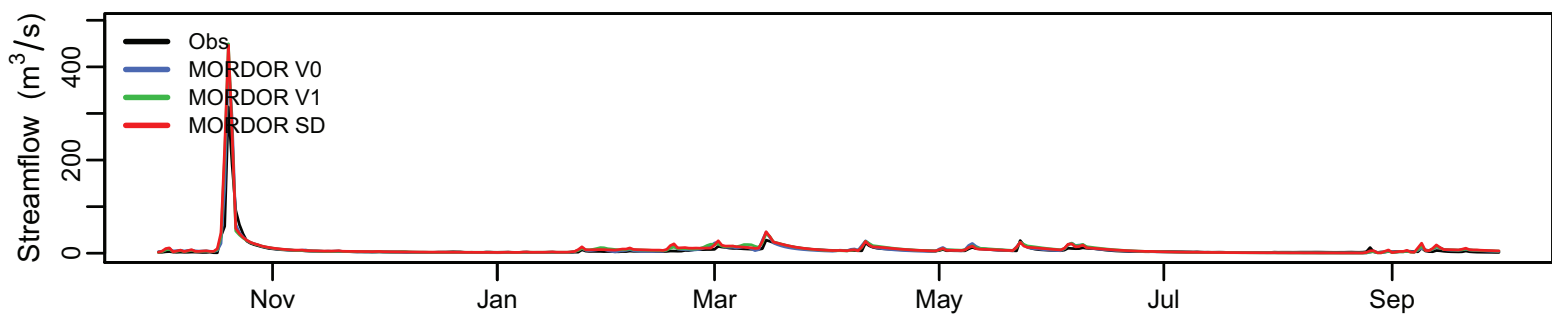

Year 2003

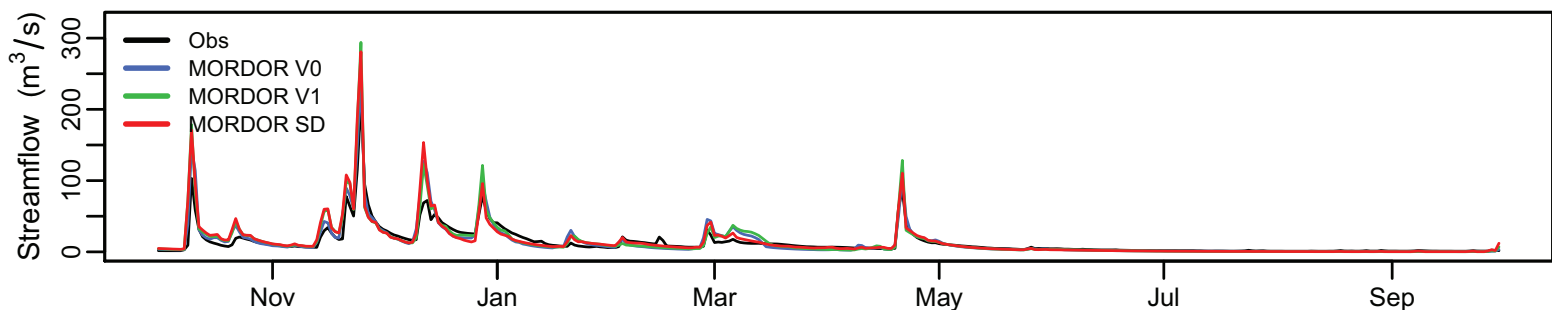

Year 2004

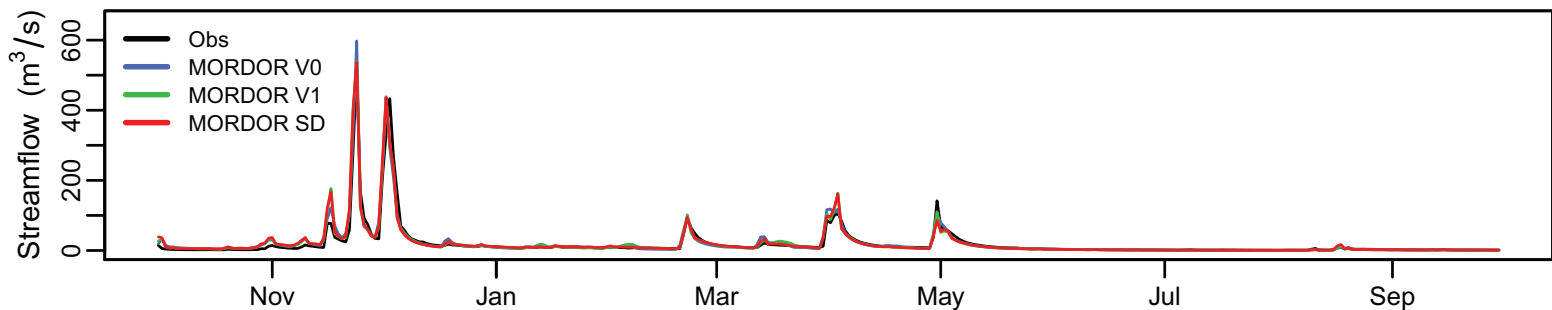

# Chassezac@SteMarguerite

Year 2005

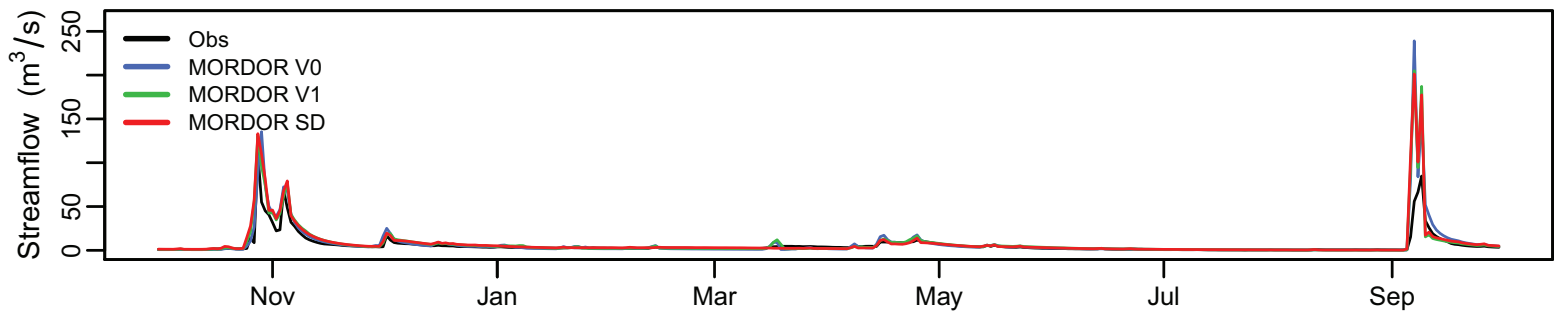

Year 2006

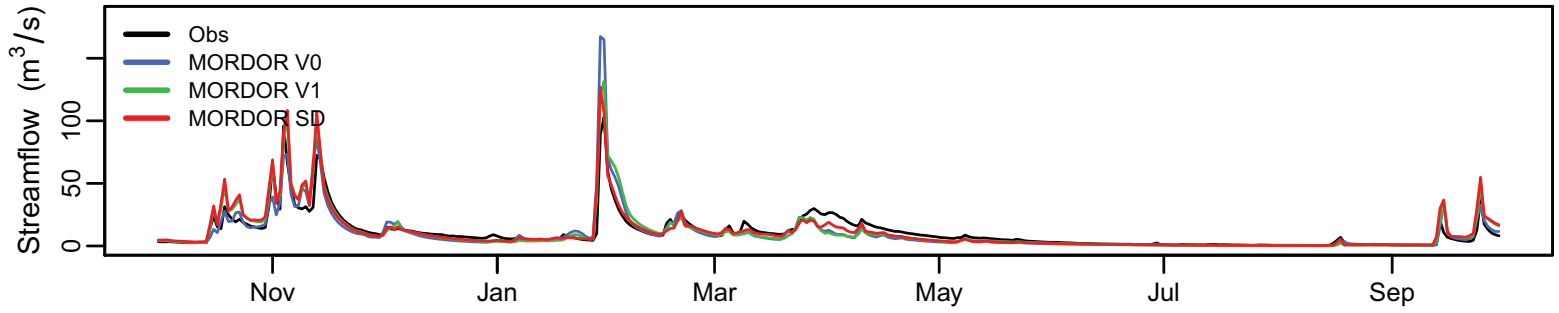

# Creuse@Age

Year 1961

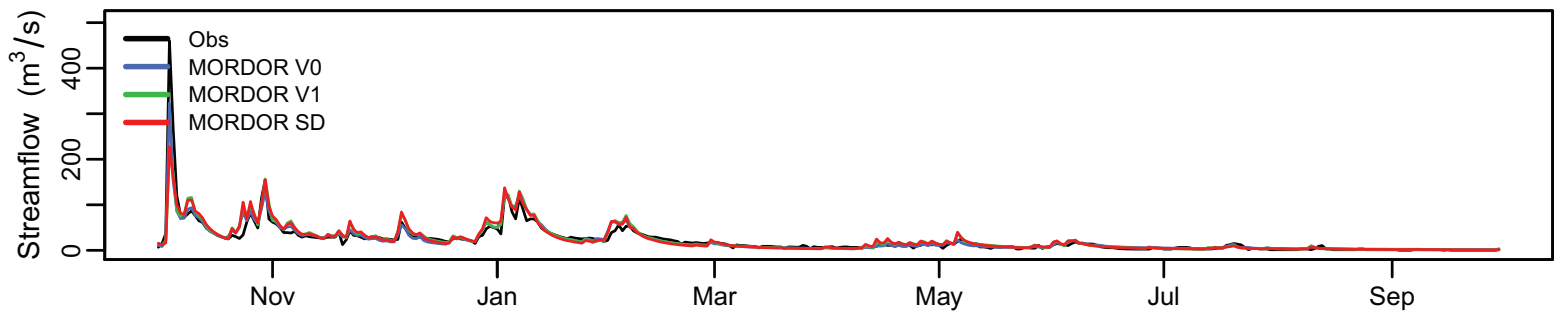

Year 1962

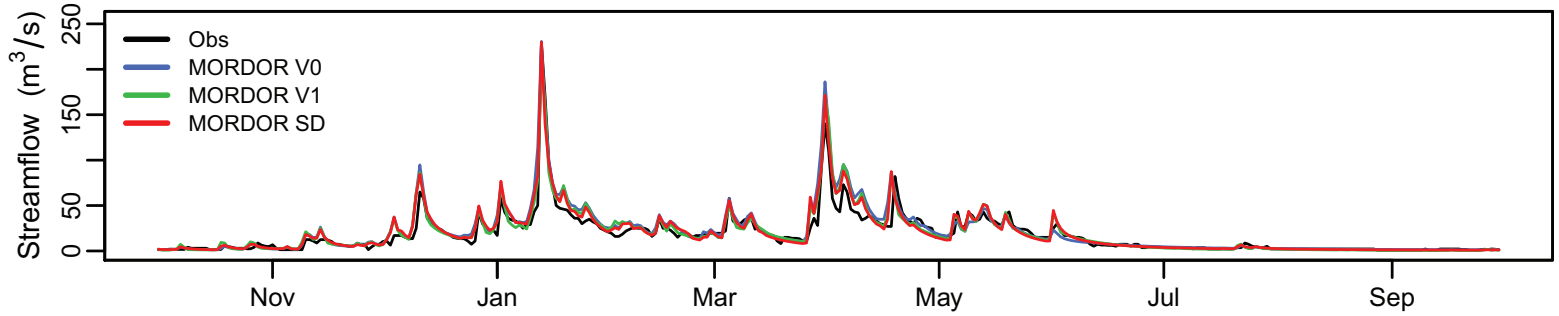

Year 1963

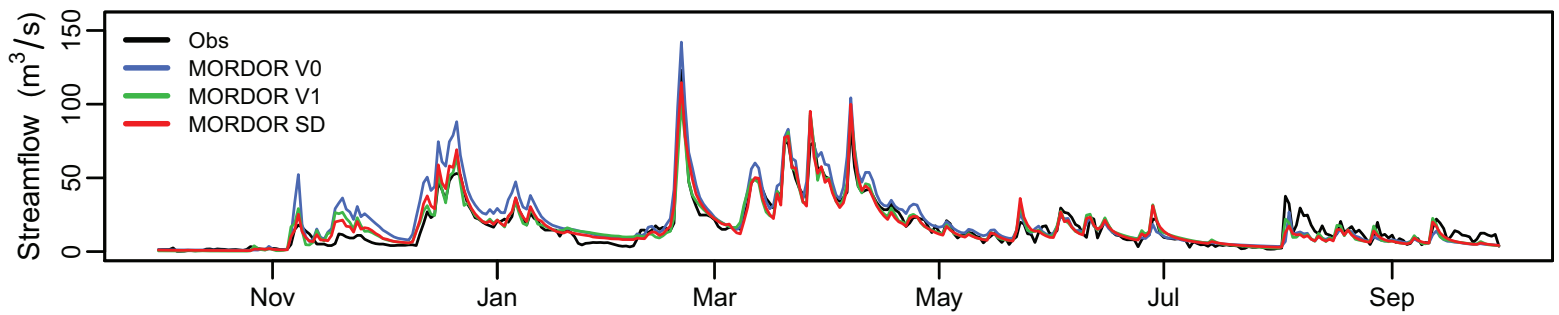

Year 1964

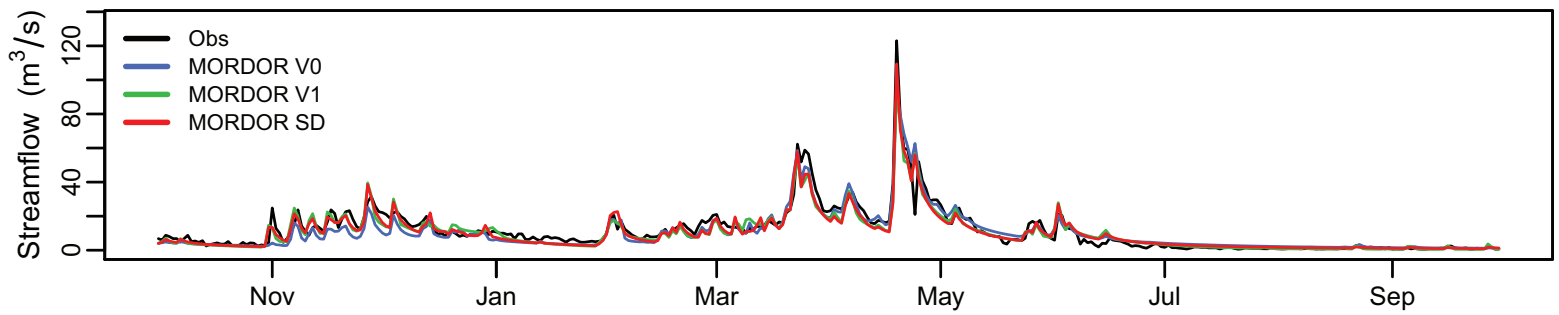

Year 1965

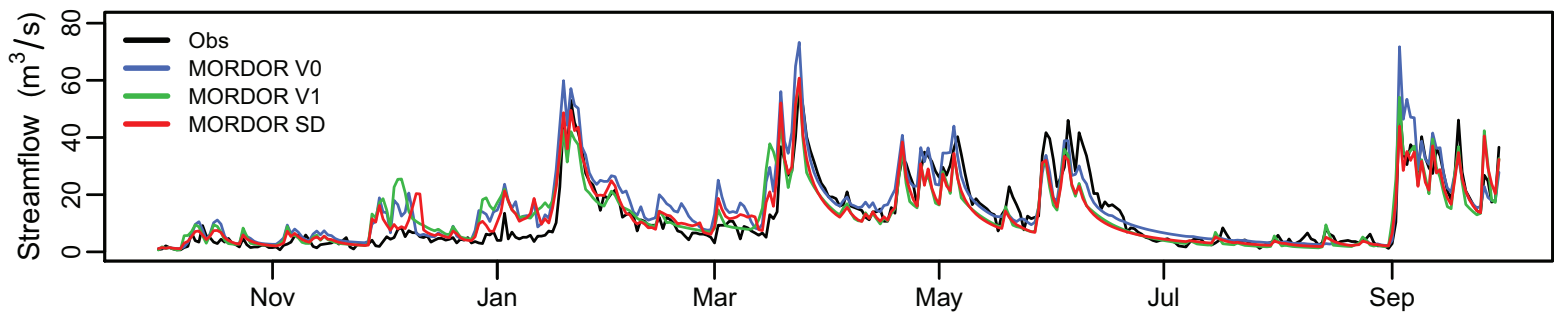

Year 1966

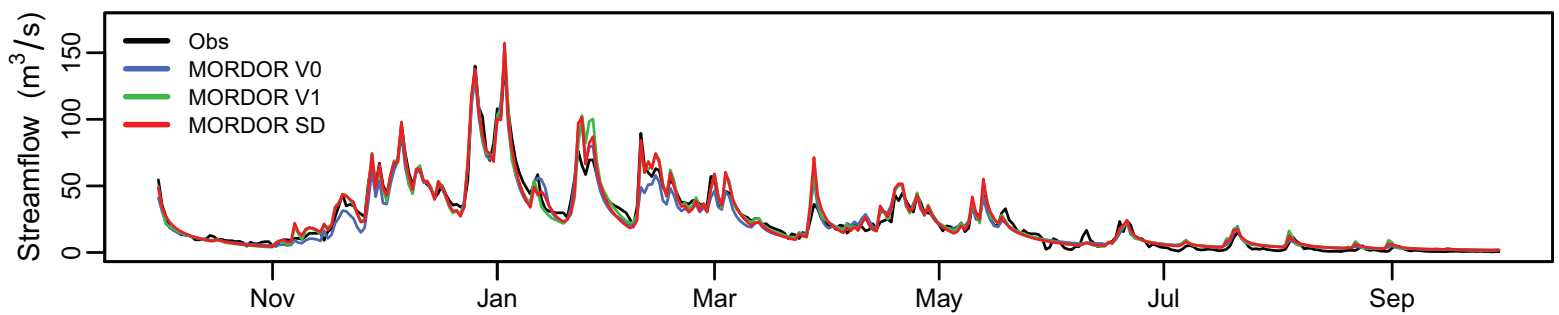

# Creuse@Age

Year 1967

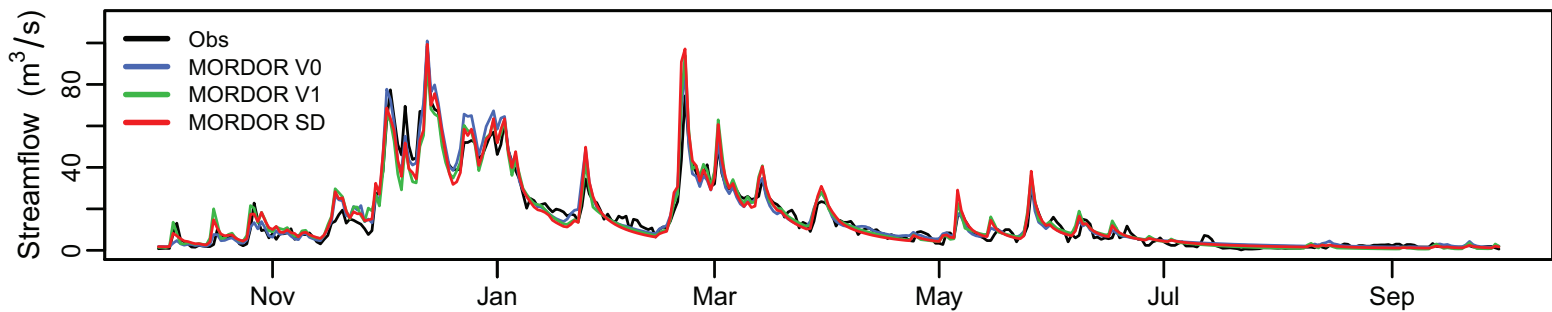

Year 1968

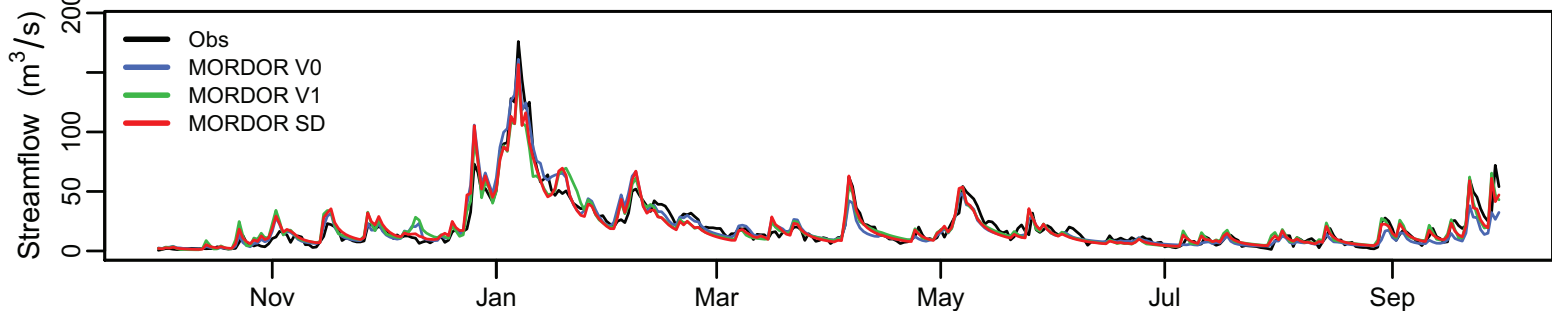

Year 1969

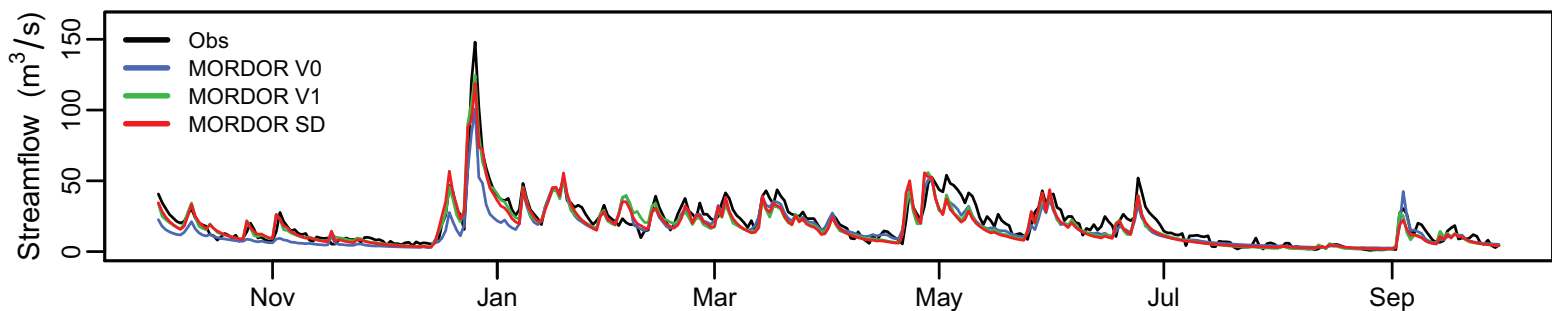

Year 1970

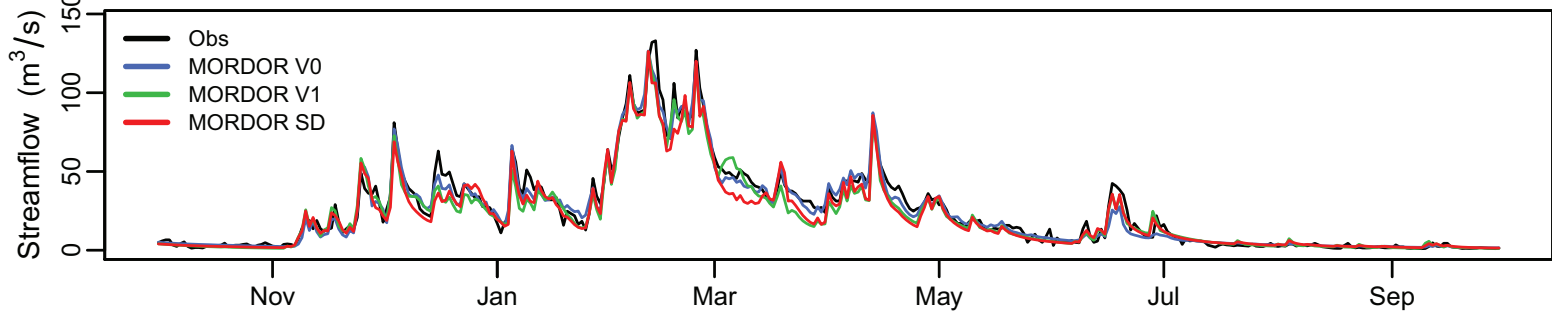

Year 1971

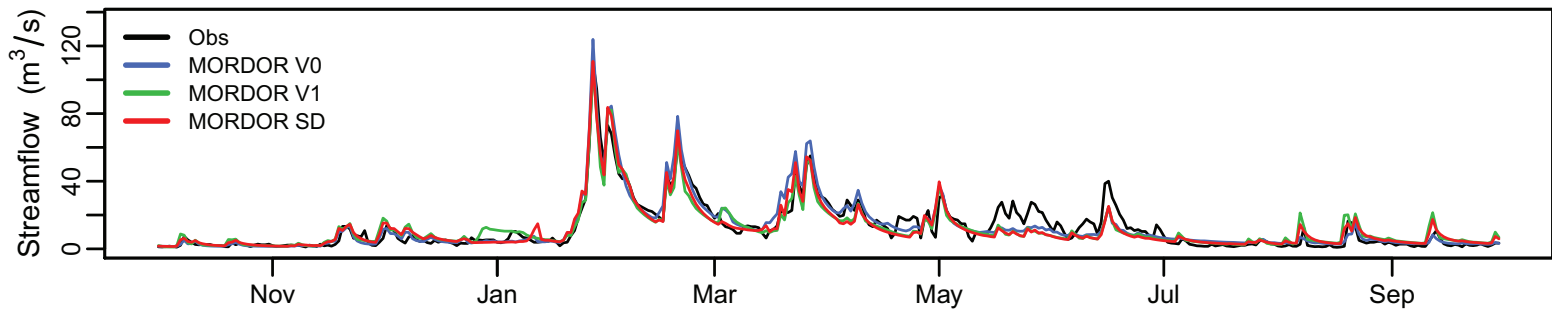

Year 1972

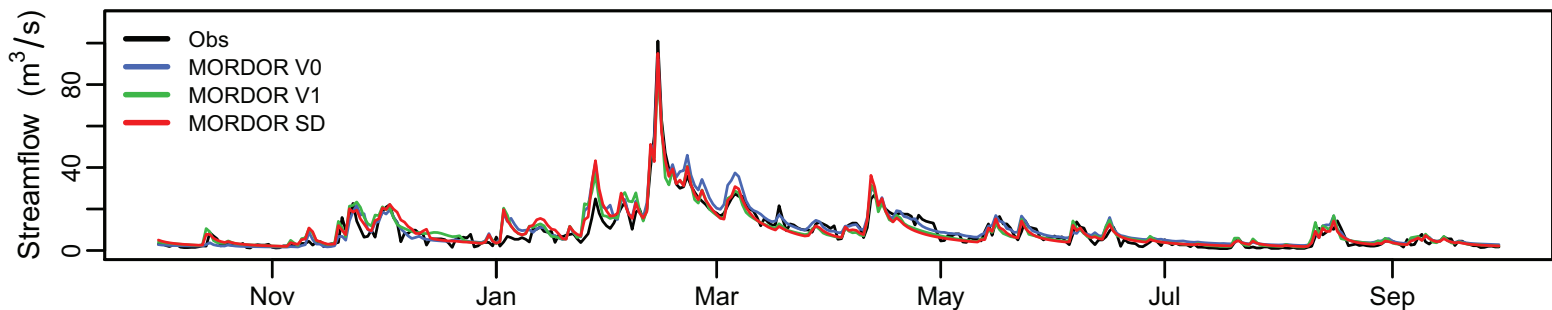

# Creuse@Age

Year 1973

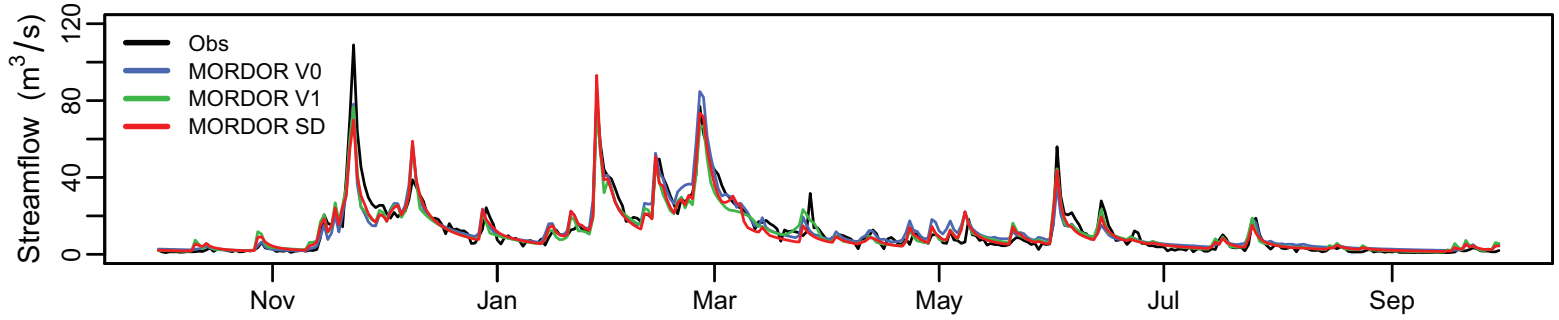

Year 1974

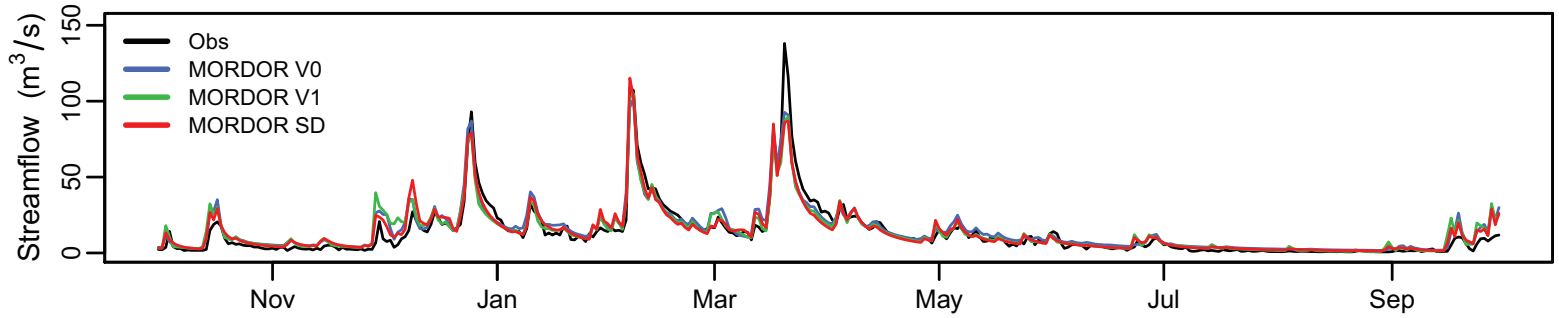

Year 1975

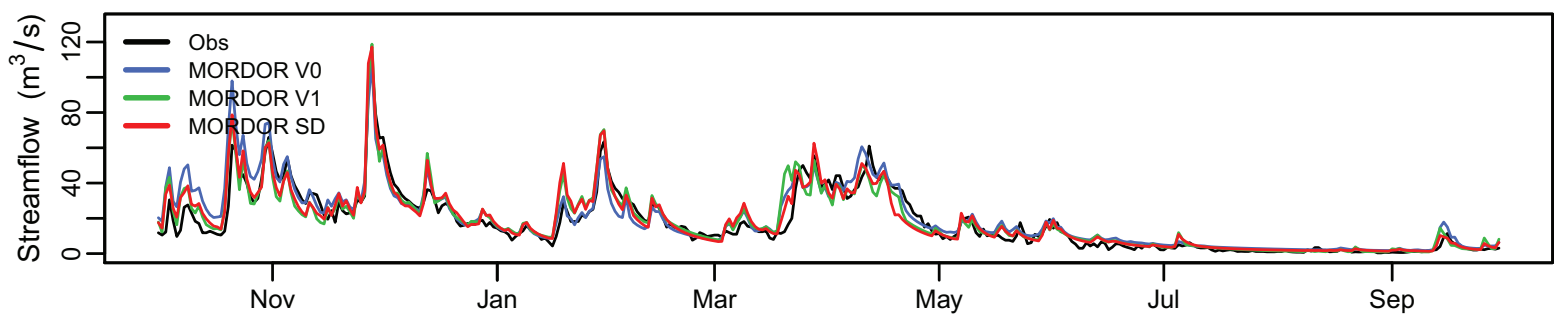

Year 1976

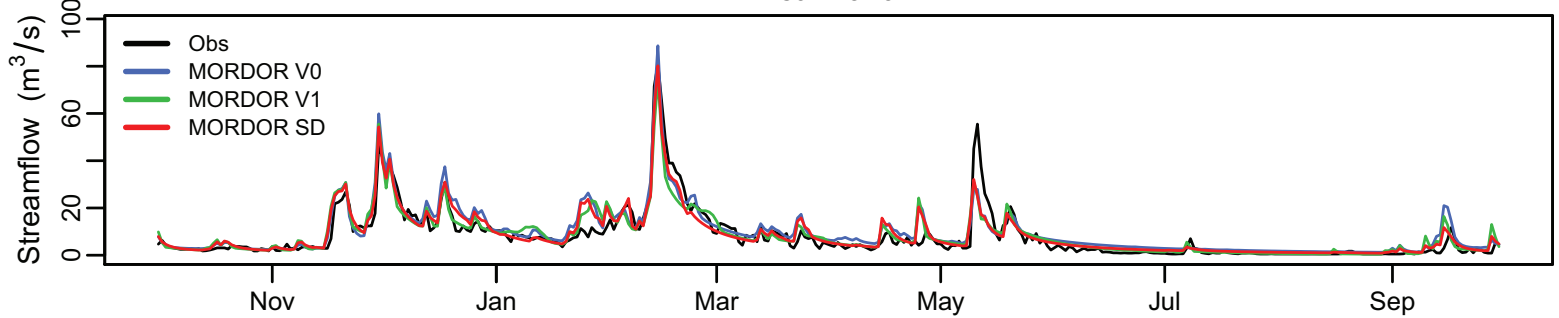

Year 1977

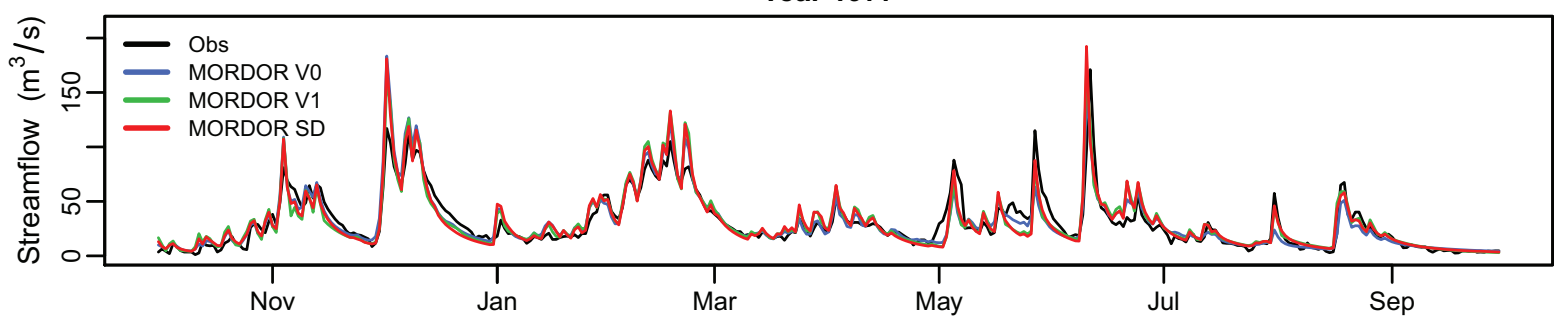

Year 1978

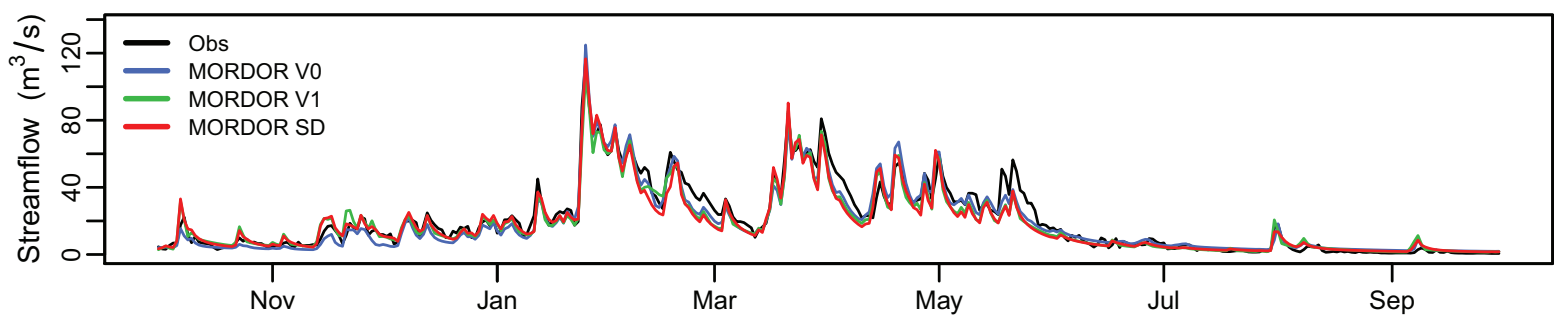



# Creuse@Age

Year 1979

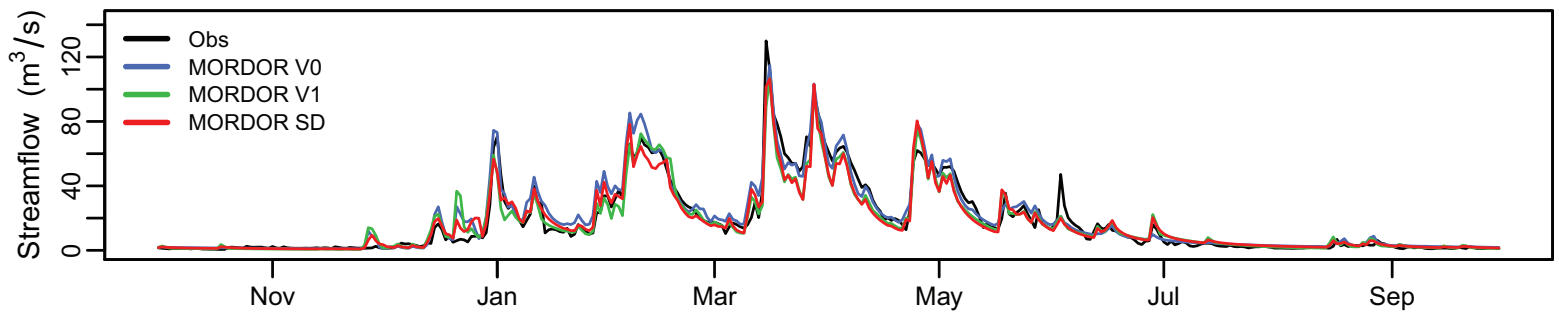

Year 1980

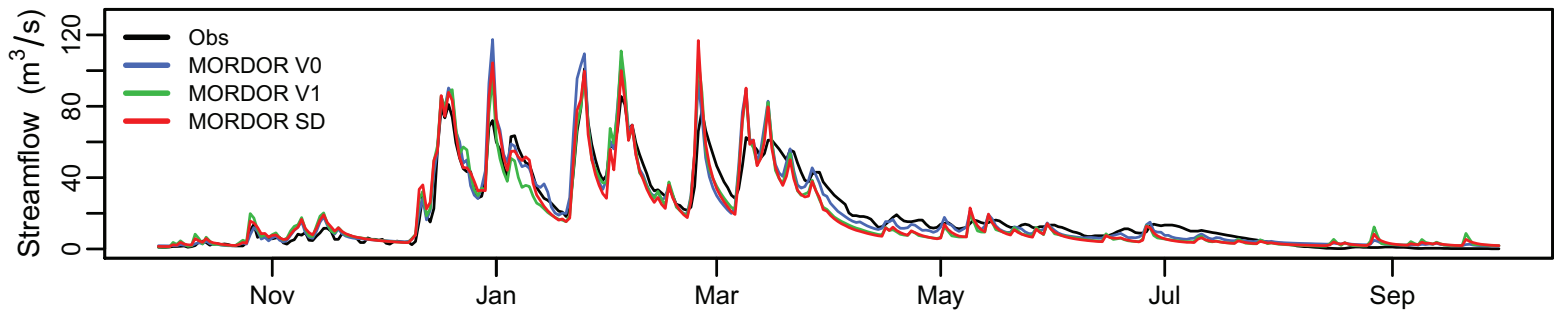

Year 1981

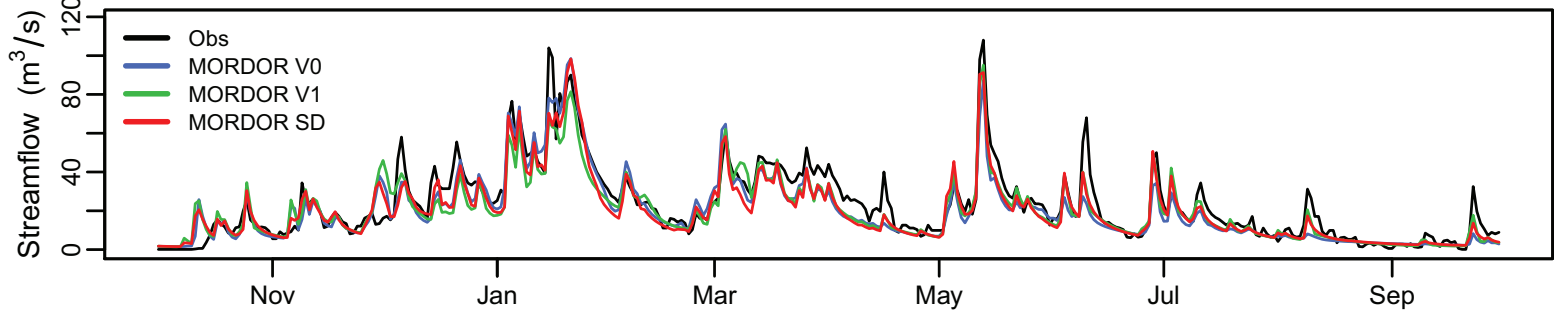

Year 1982

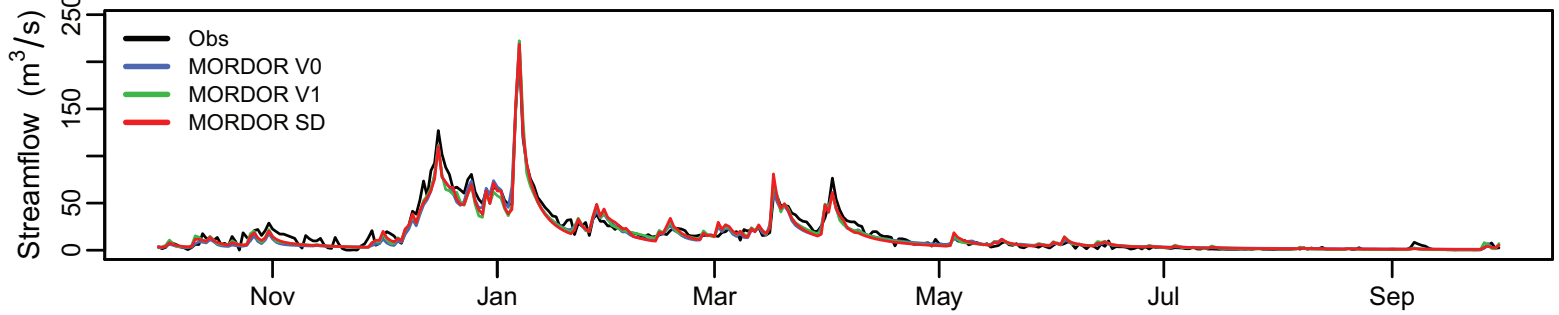

Year 1983

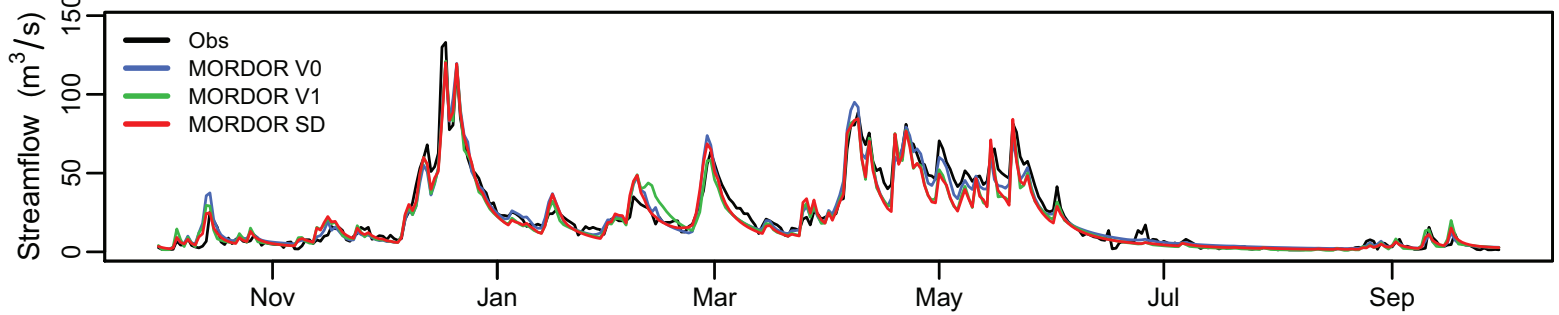

Year 1984

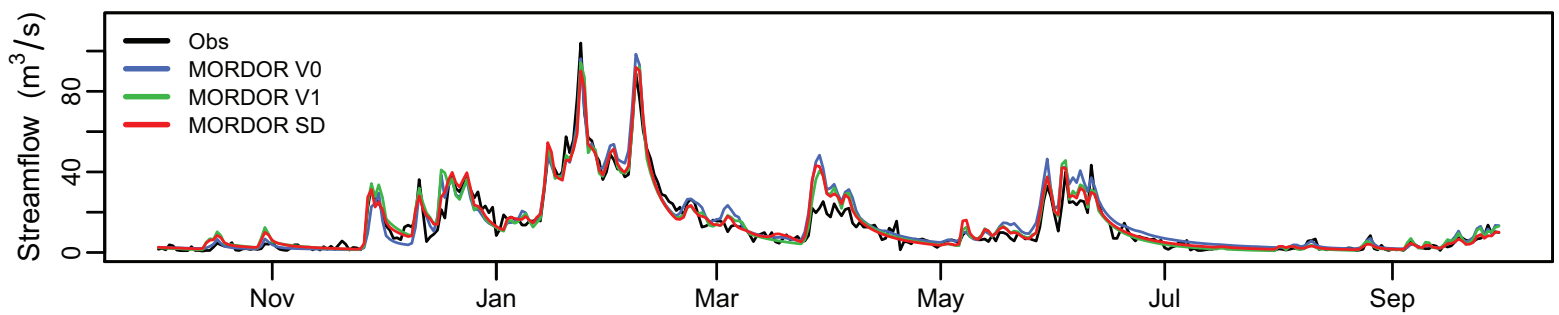

# Creuse@Age

Year 1985

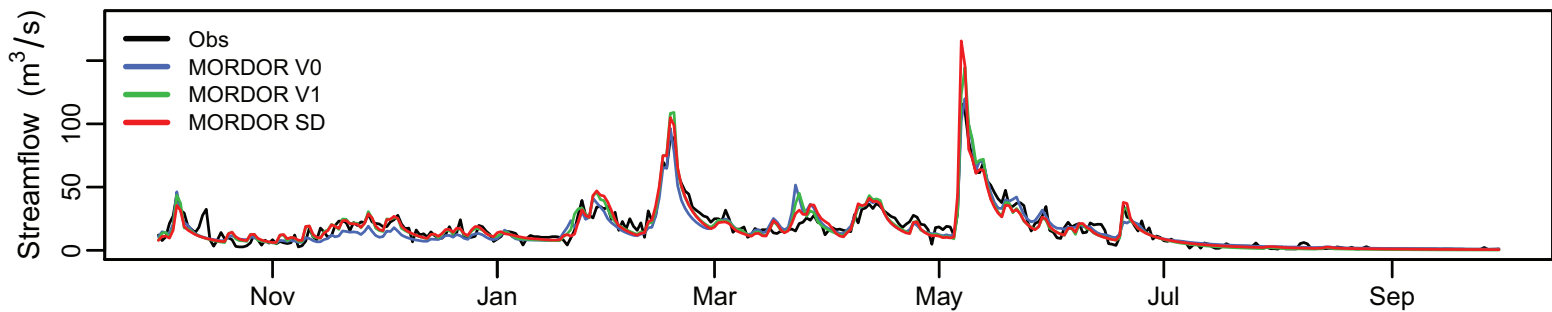

Year 1986

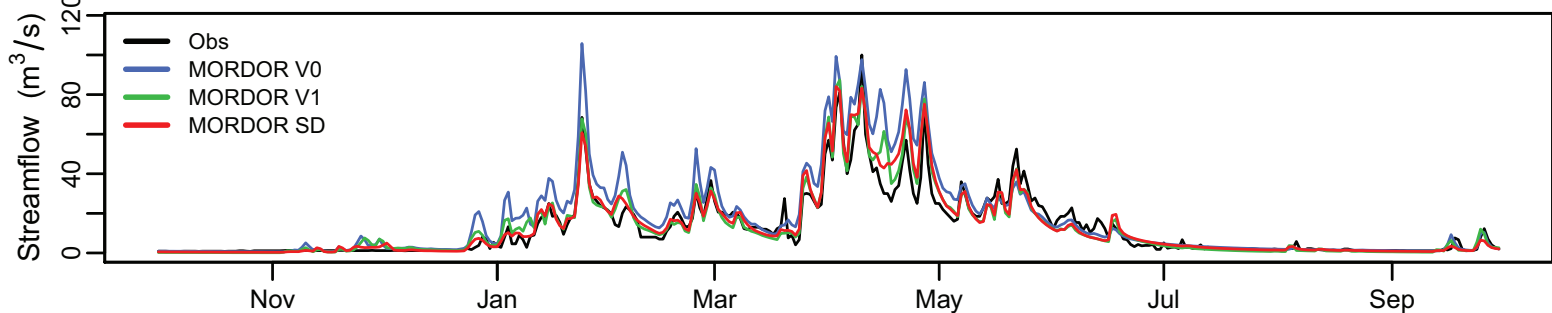

Year 1987

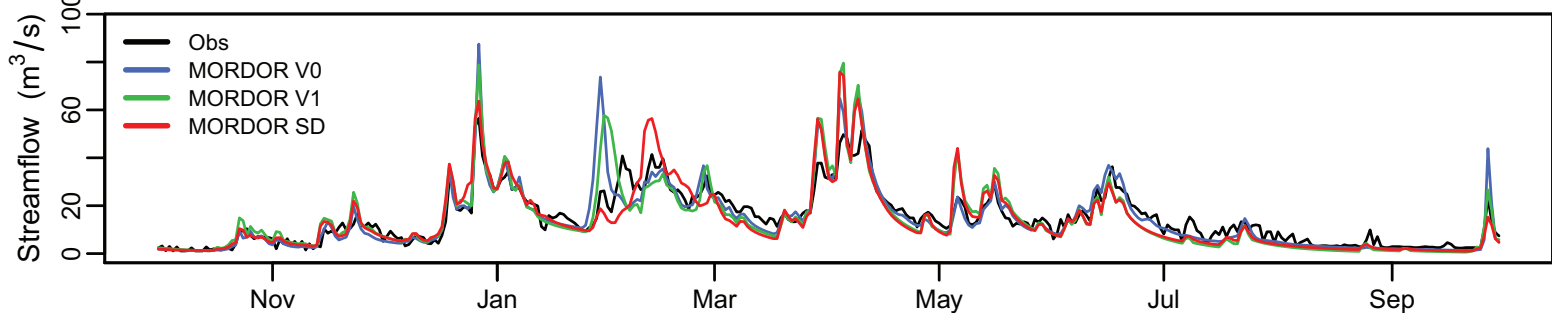

Year 1988

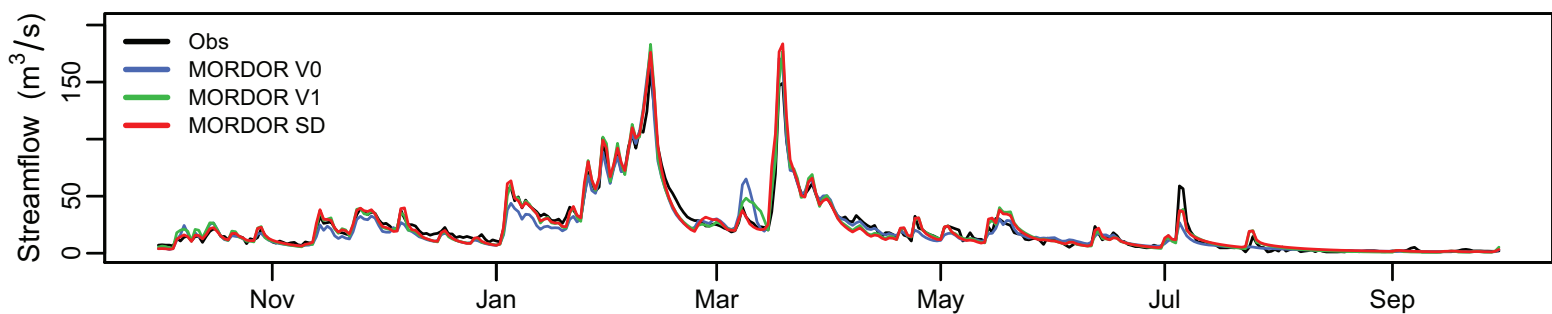

Year 1989

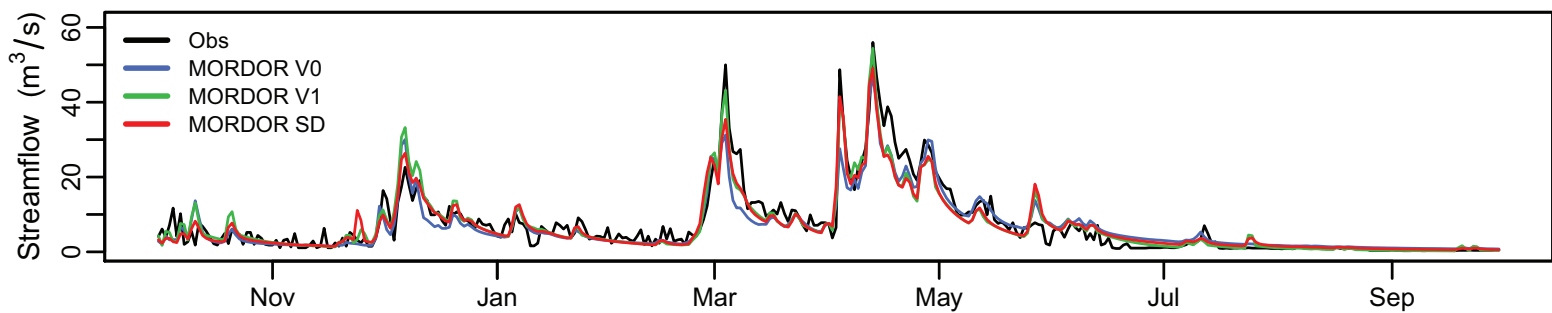

Year 1990

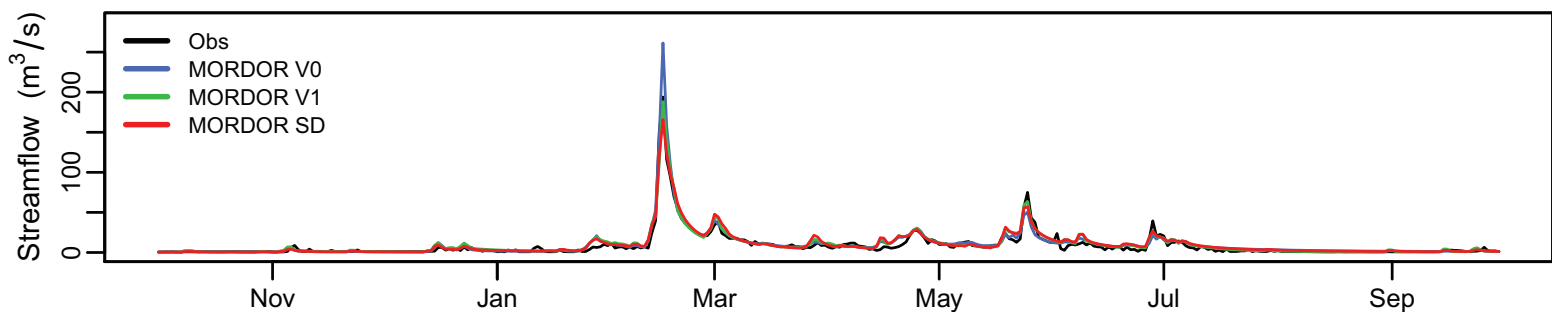

# Creuse@Age

Year 1991

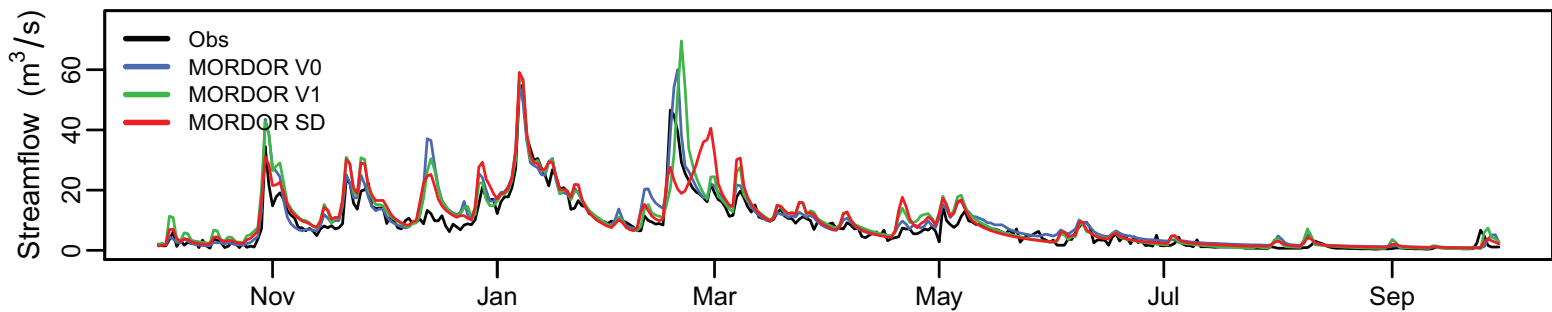

Year 1992

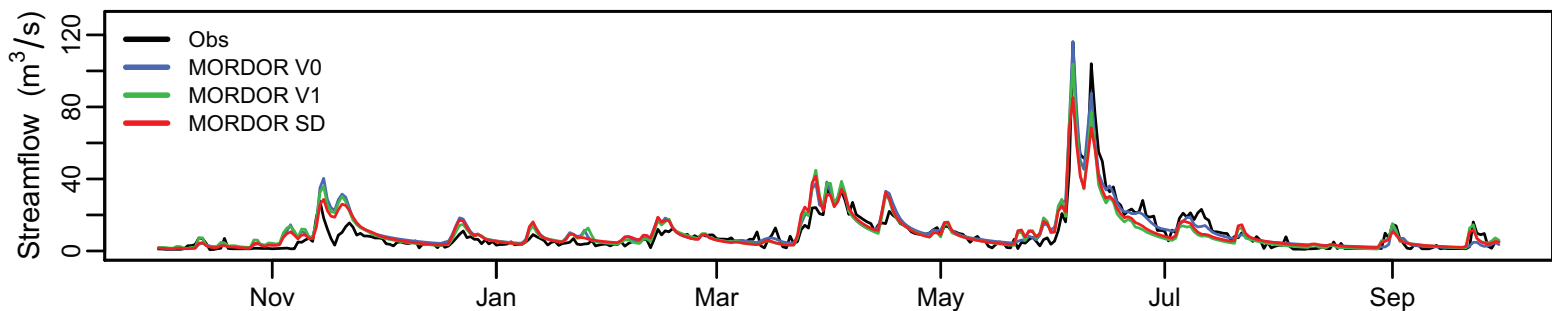

Year 1993

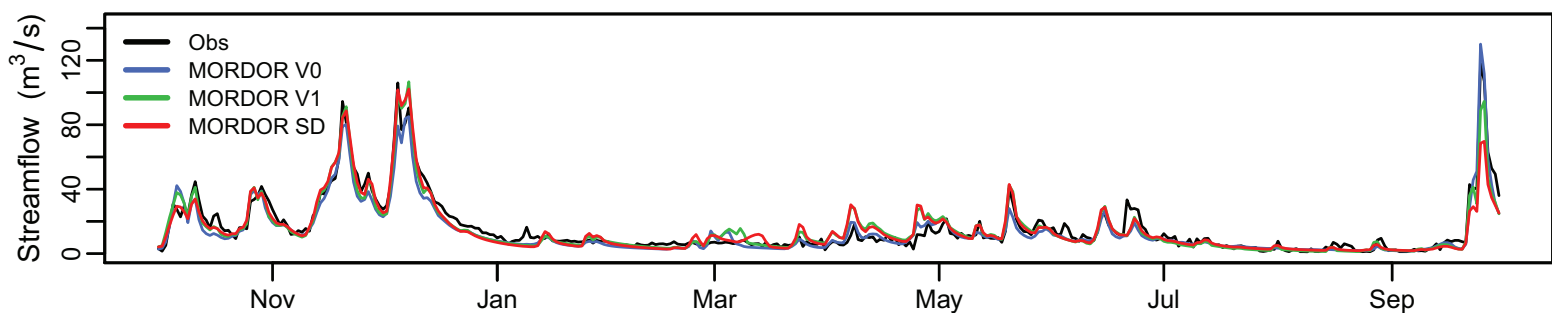

Year 1994

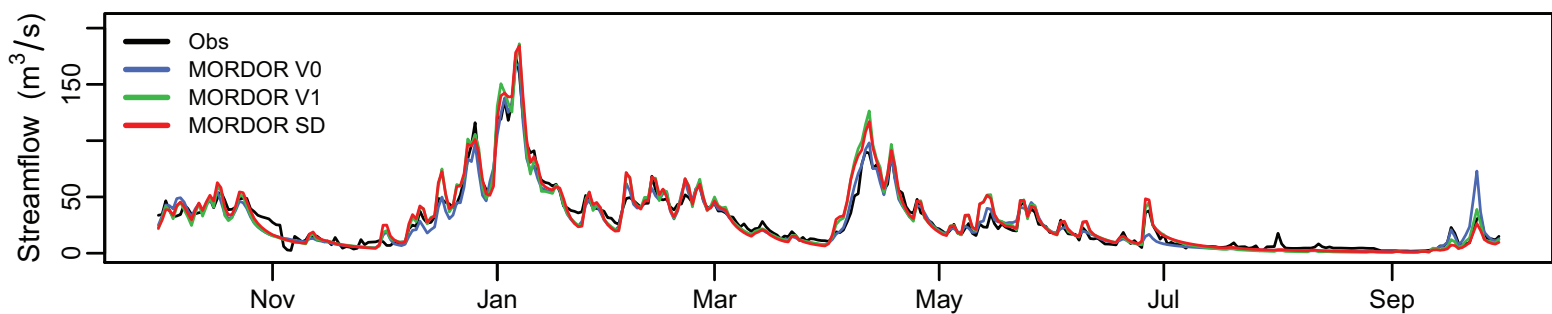

Year 1995

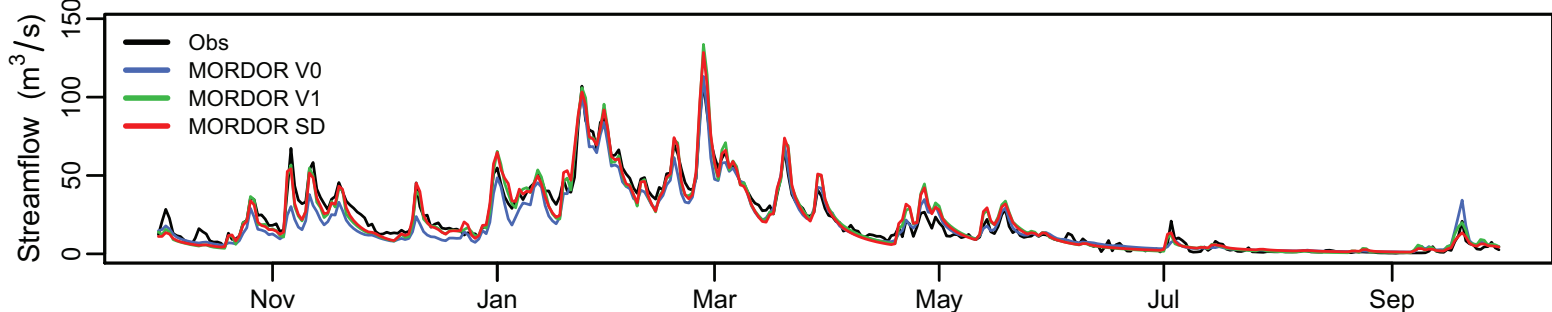

Year 1996

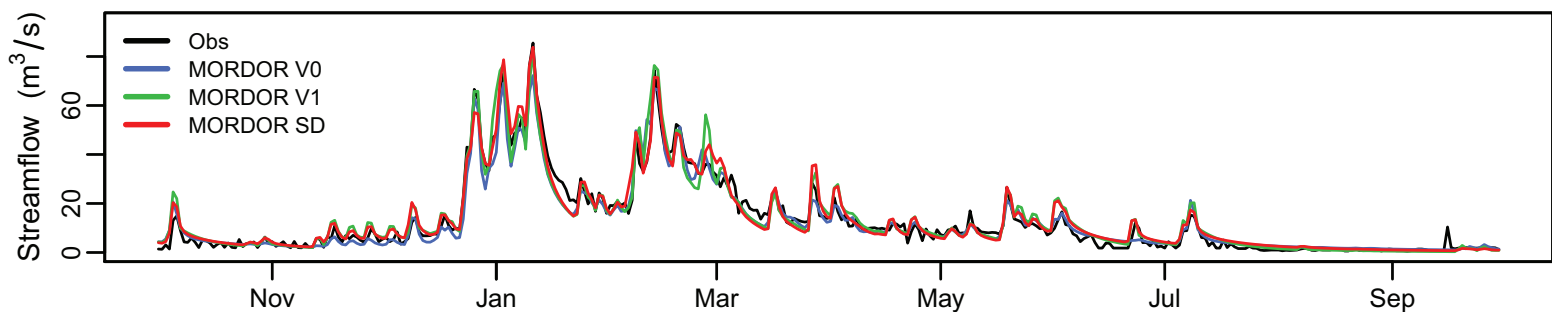

# Creuse@Age

Year 1997

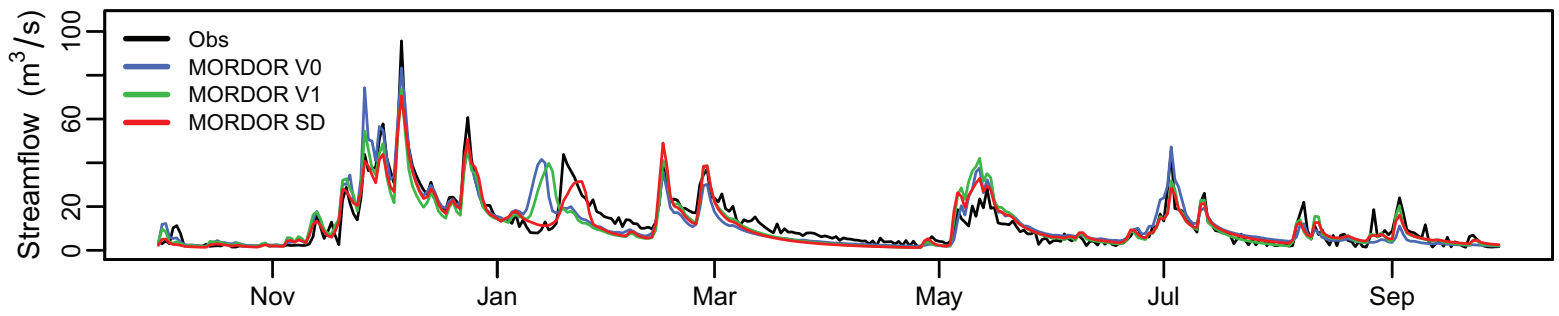

Year 1998

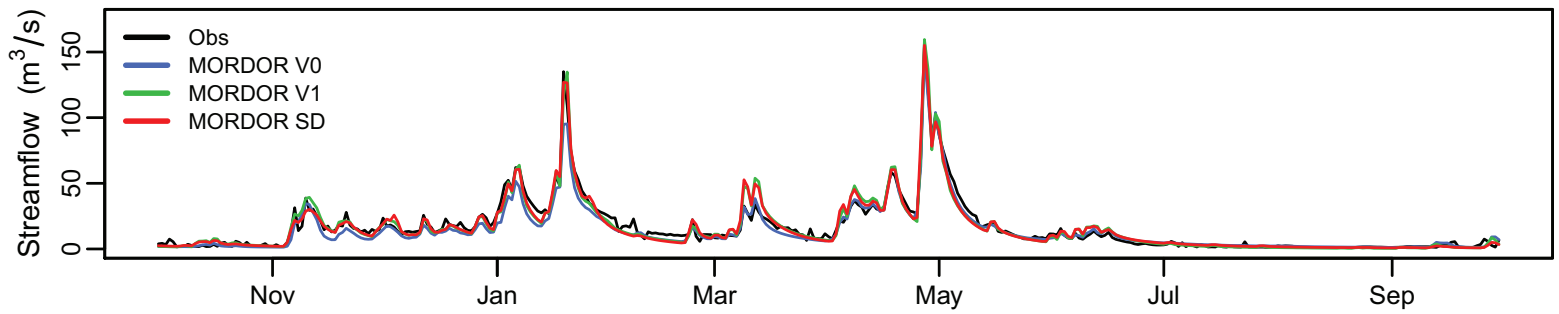

Year 1999

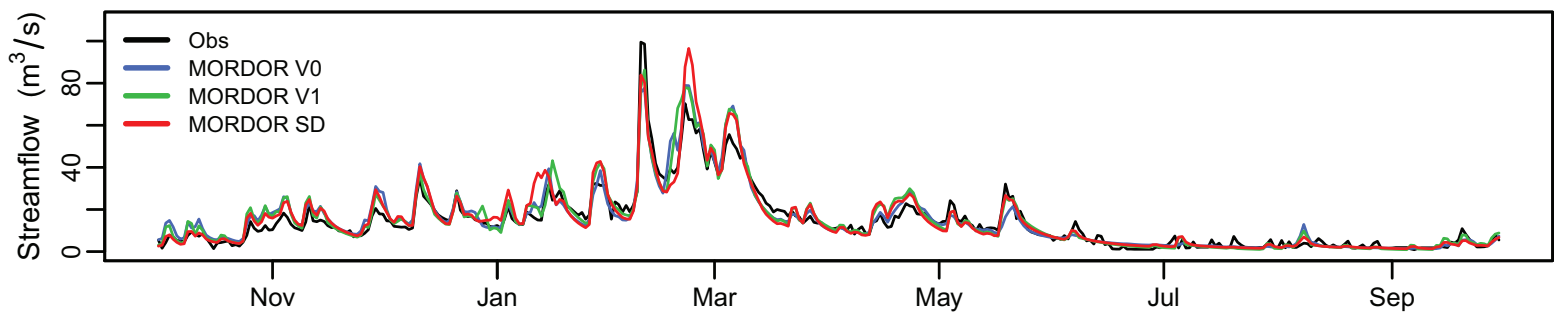

Year 2000

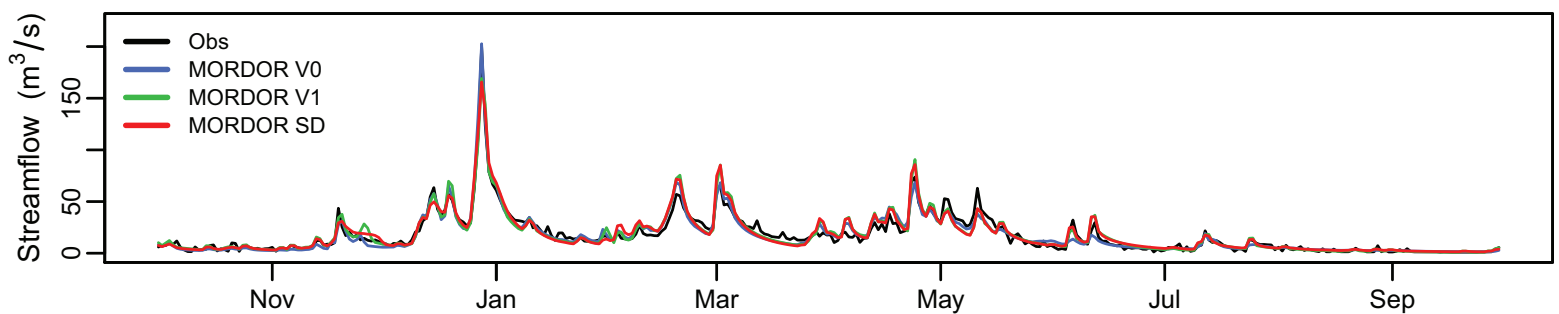

Year 2001

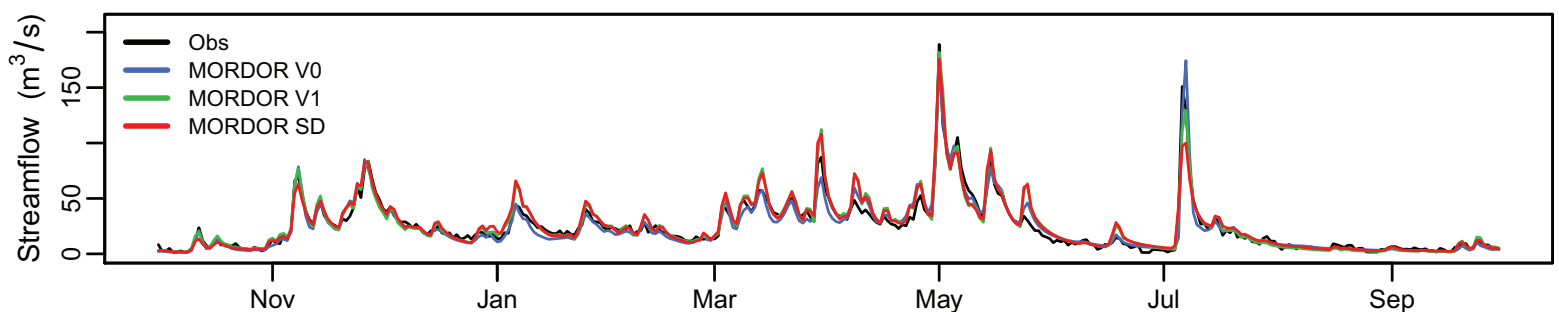

Year 2002

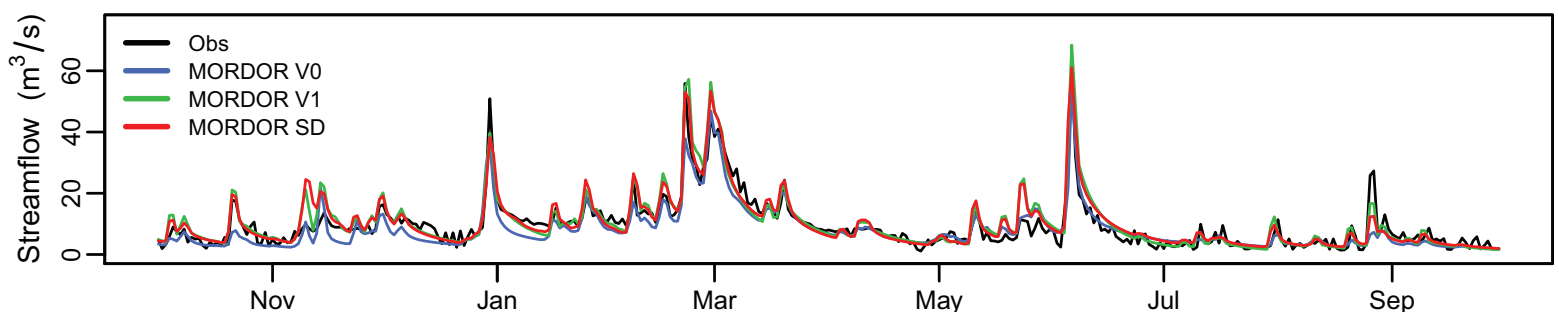

# Creuse@Age

Year 2003

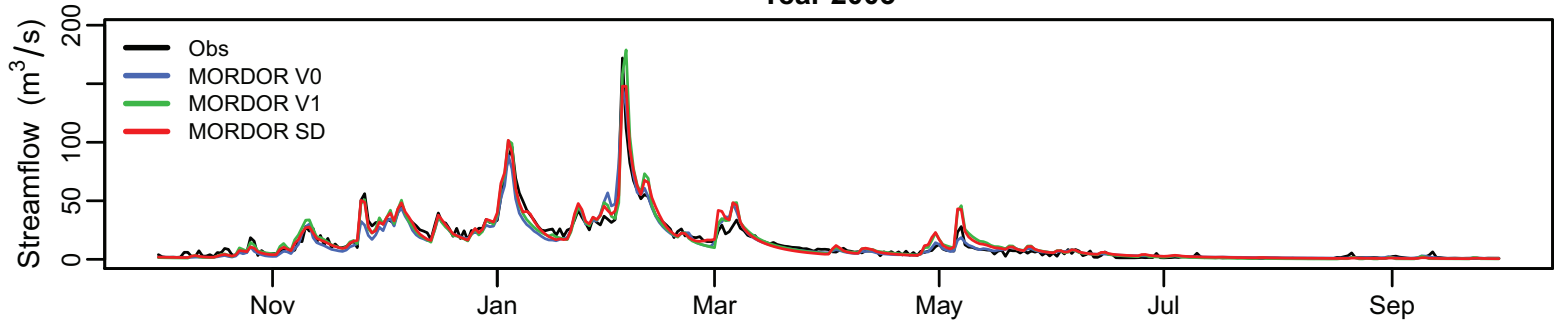

Year 2004

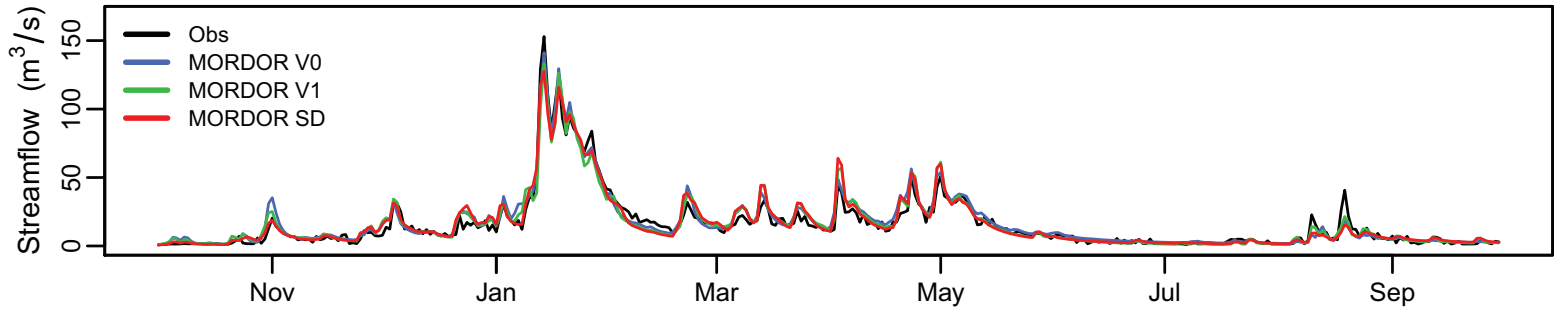

Year 2005

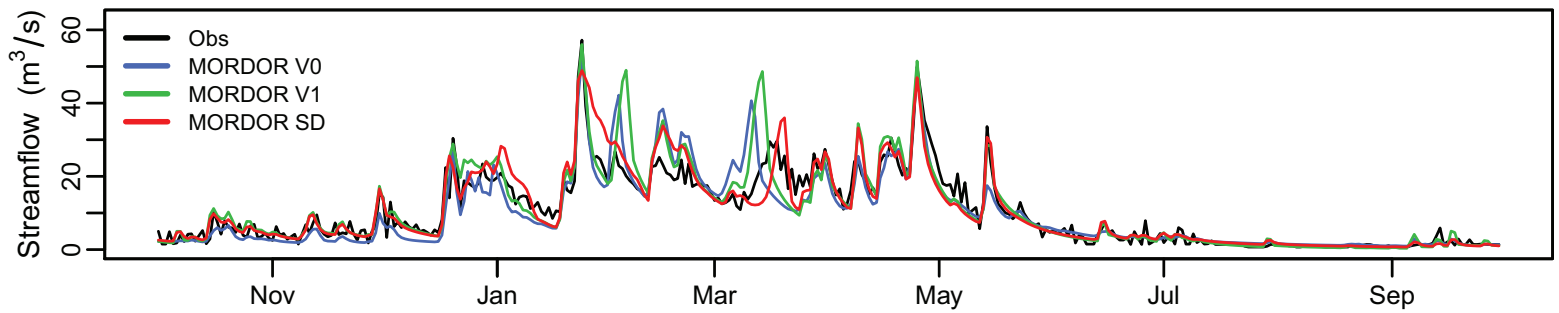

# Dordogne@Bort

Year 1980

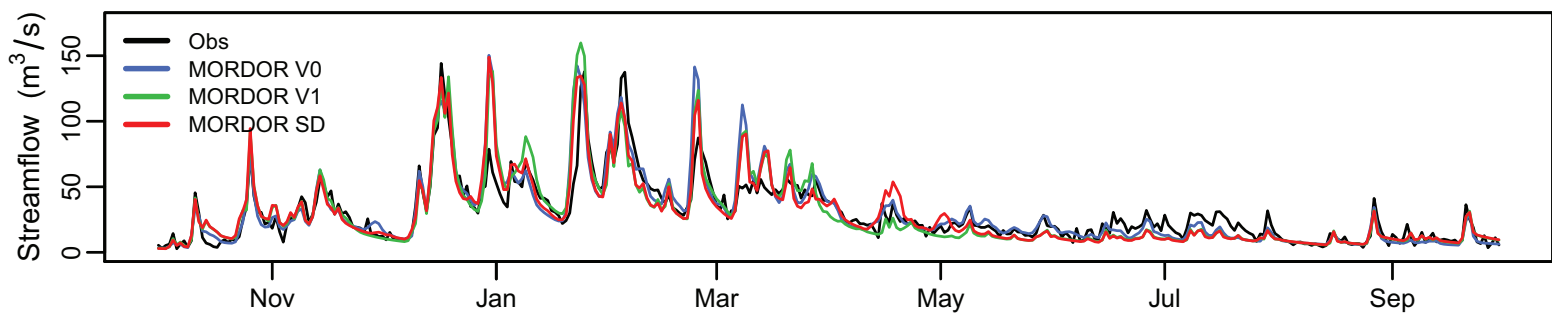

Year 1981

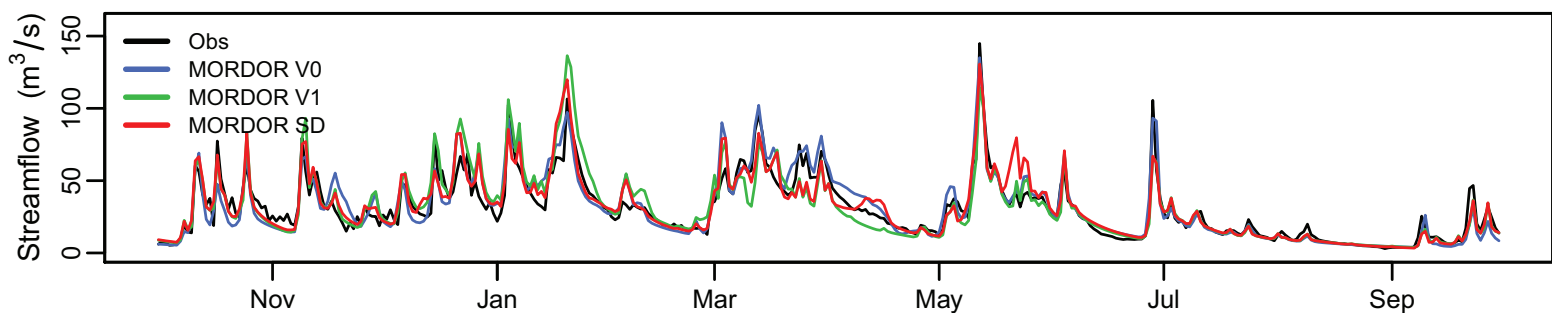

Year 1982

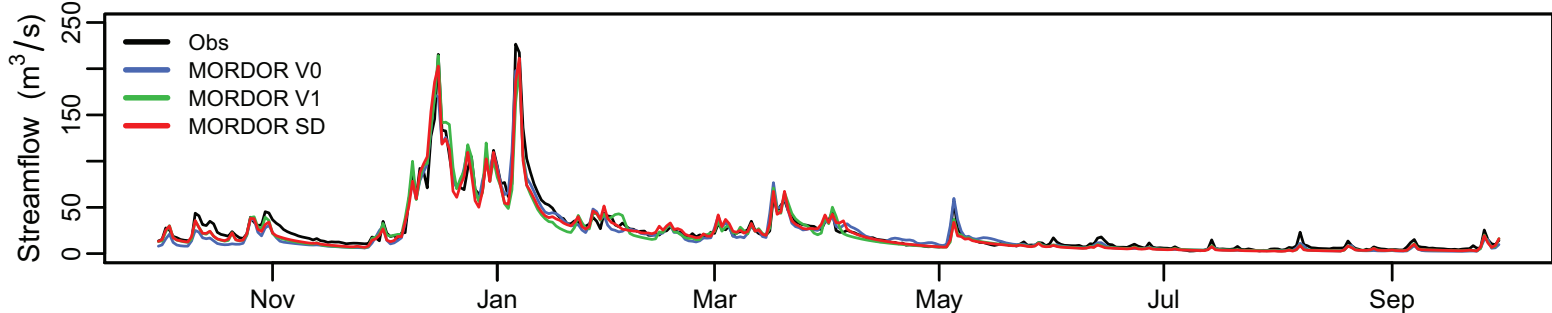

Year 1983

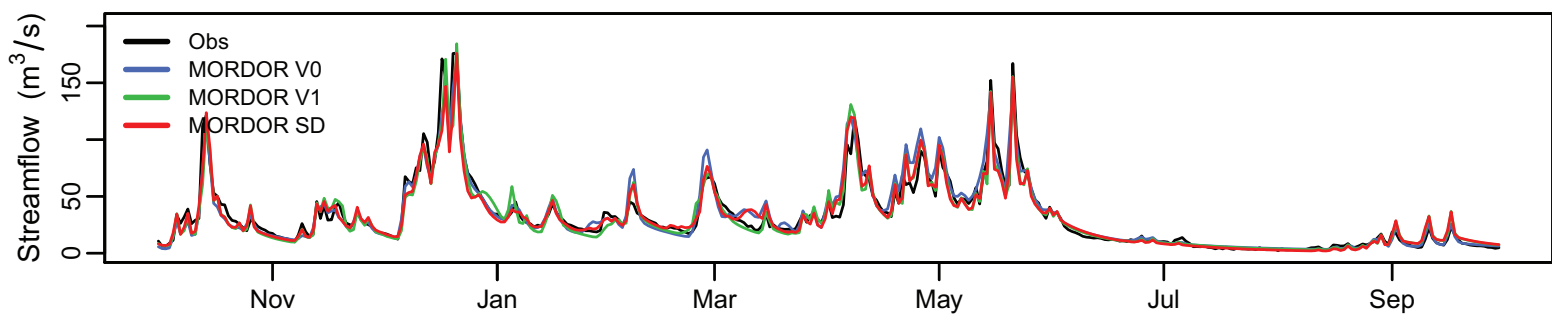

Year 1984

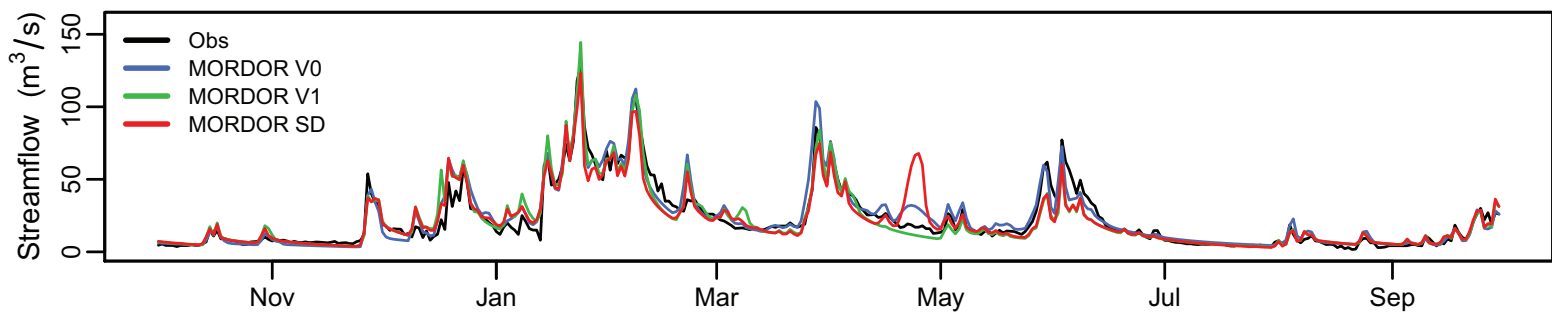

Year 1985

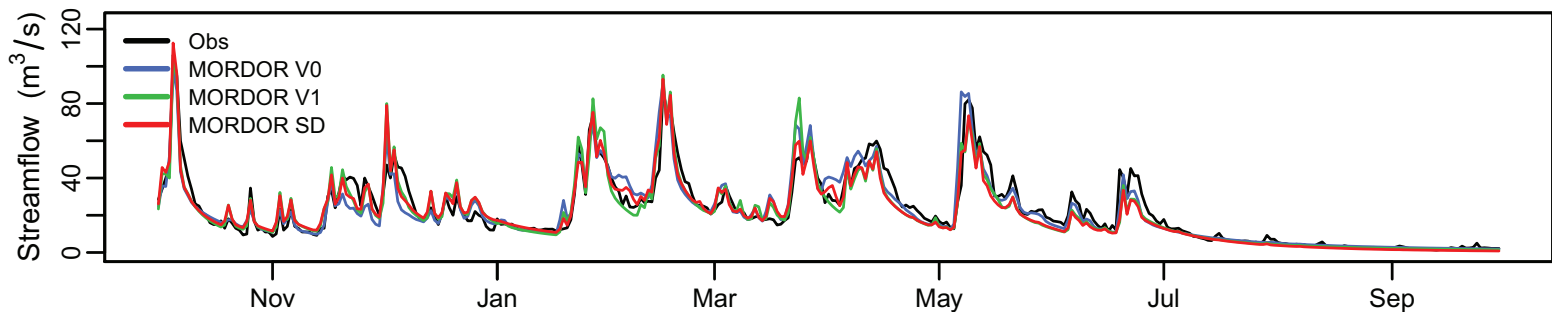

# Dordogne@Bort

Year 1986

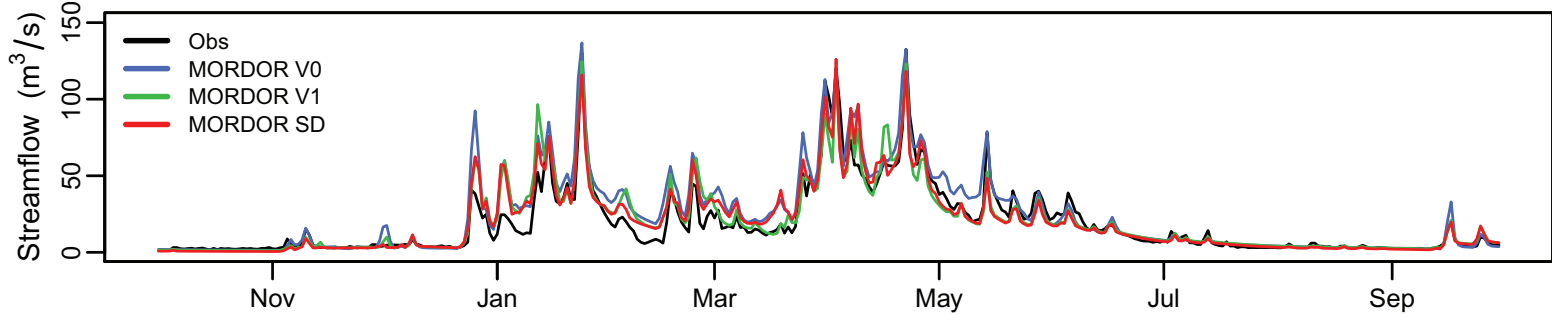

Year 1987

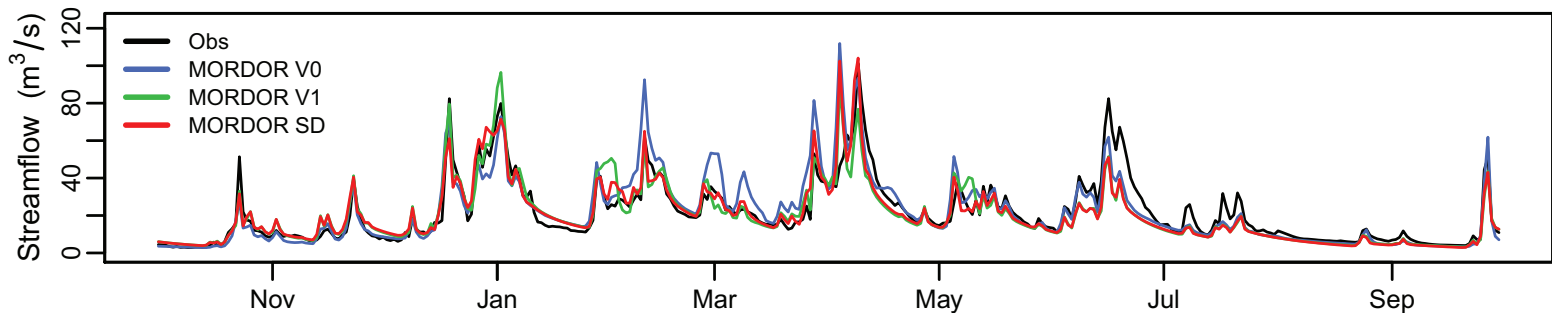

Year 1988

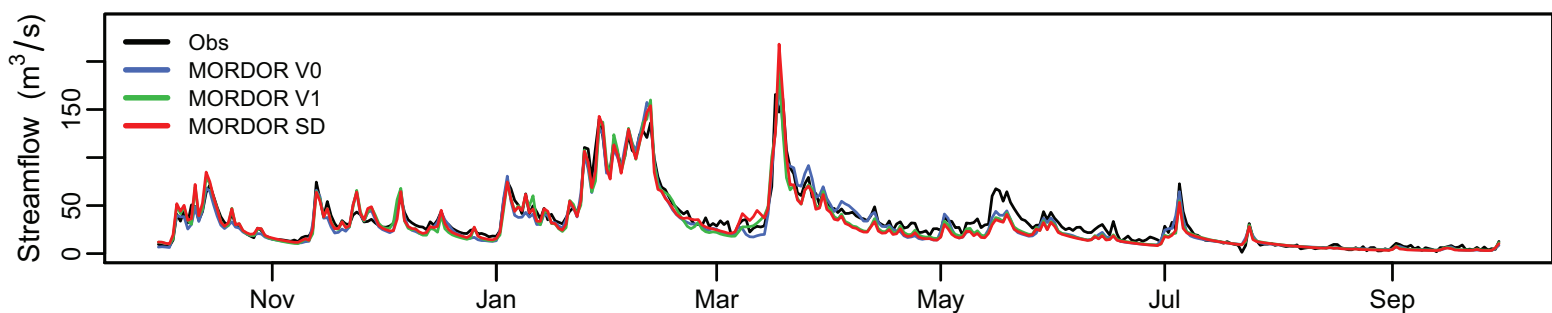

Year 1989

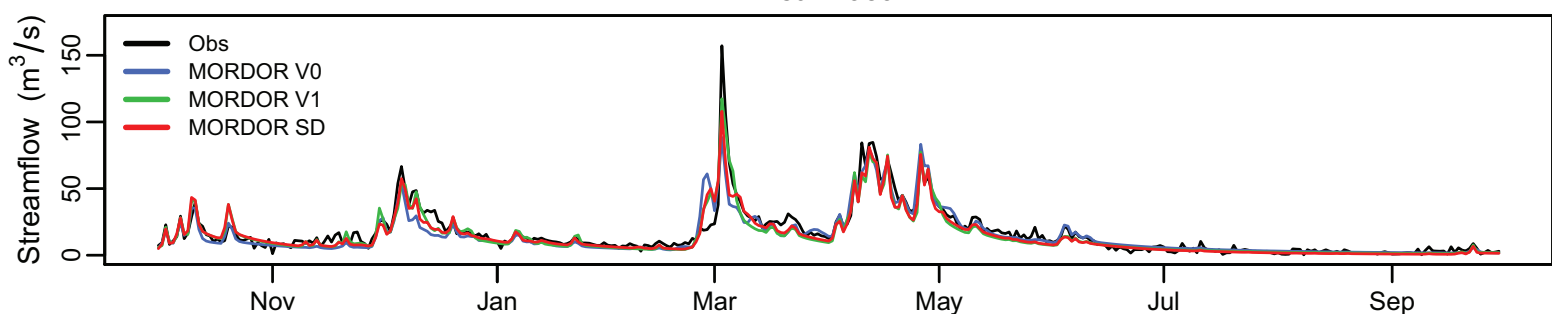

Year 1990

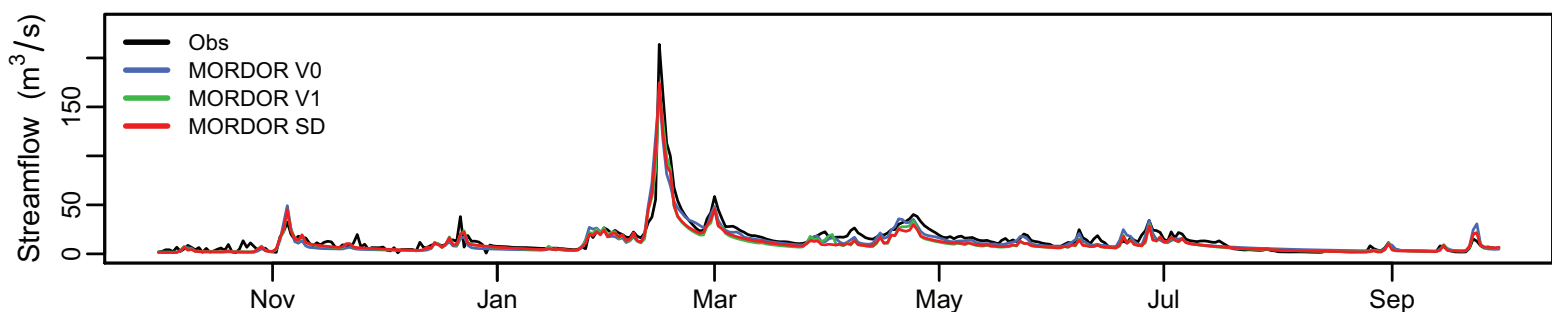

Year 1991

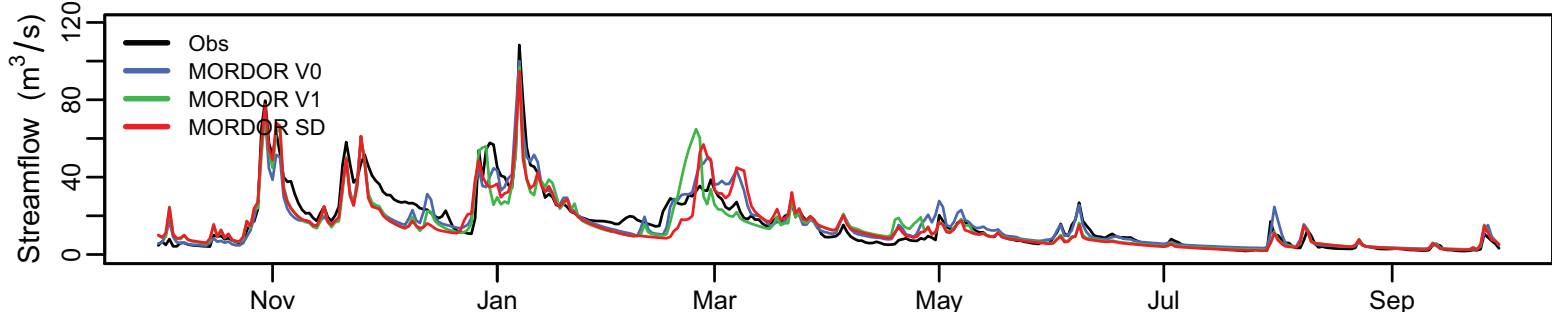

# Dordogne@Bort

Year 1992

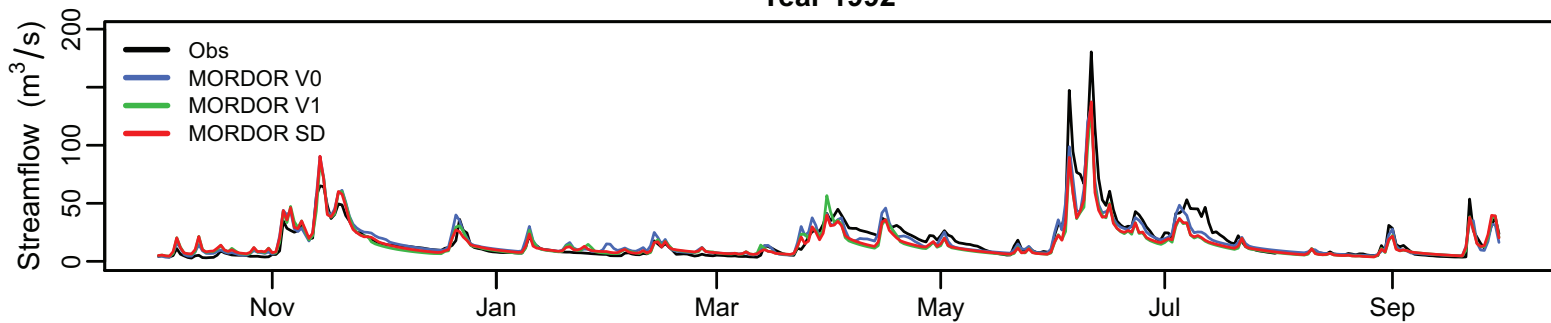

Year 1993

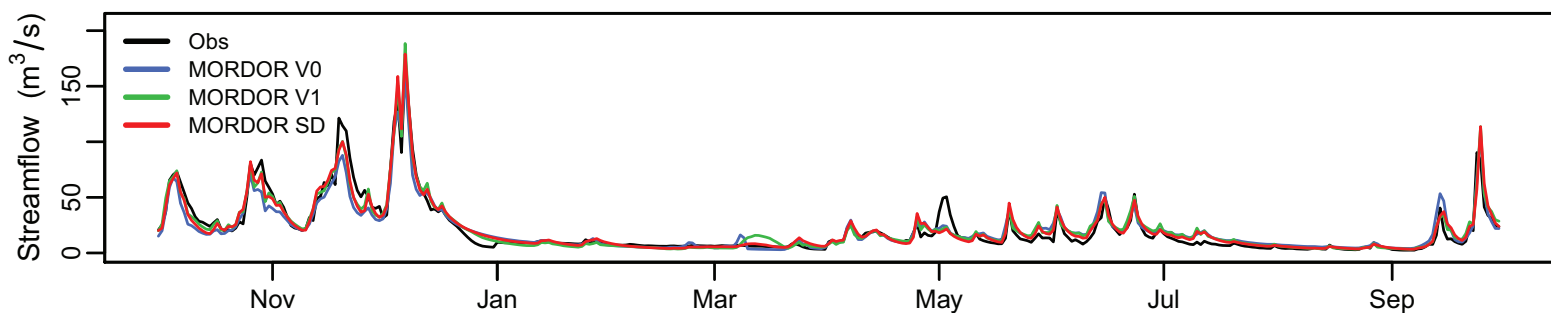

Year 1994

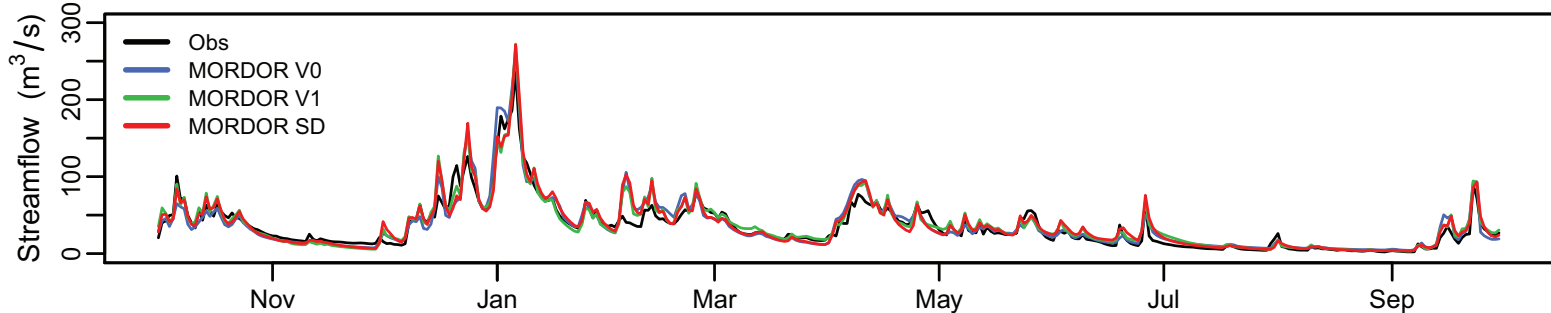

Year 1995

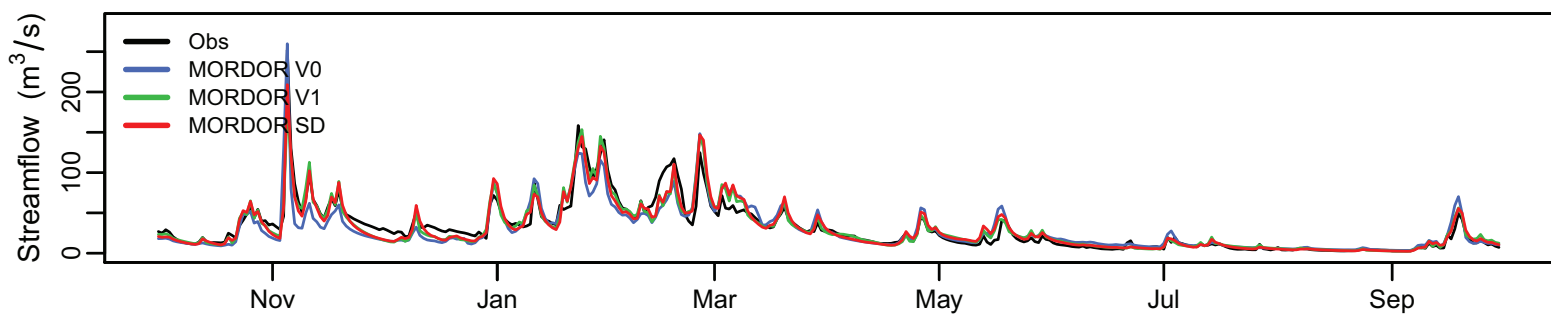

Year 1996

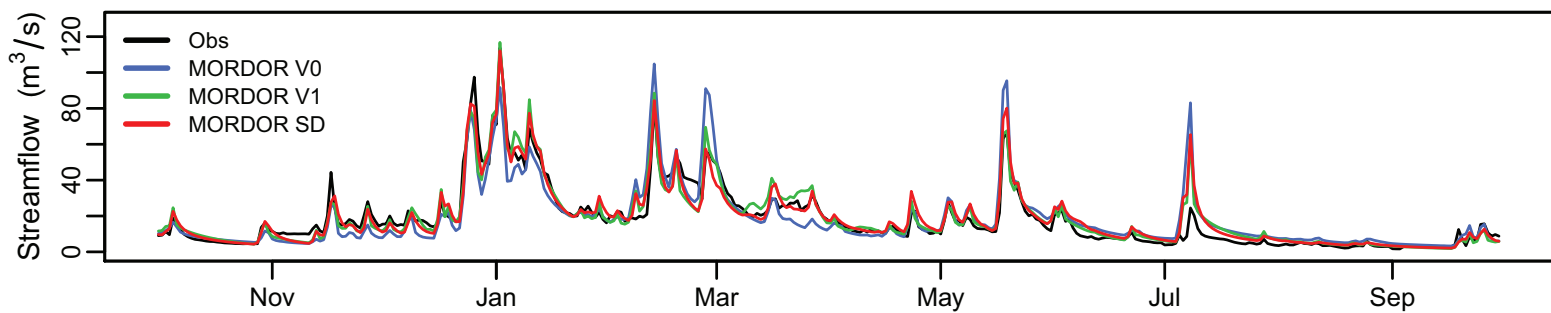

Year 1997

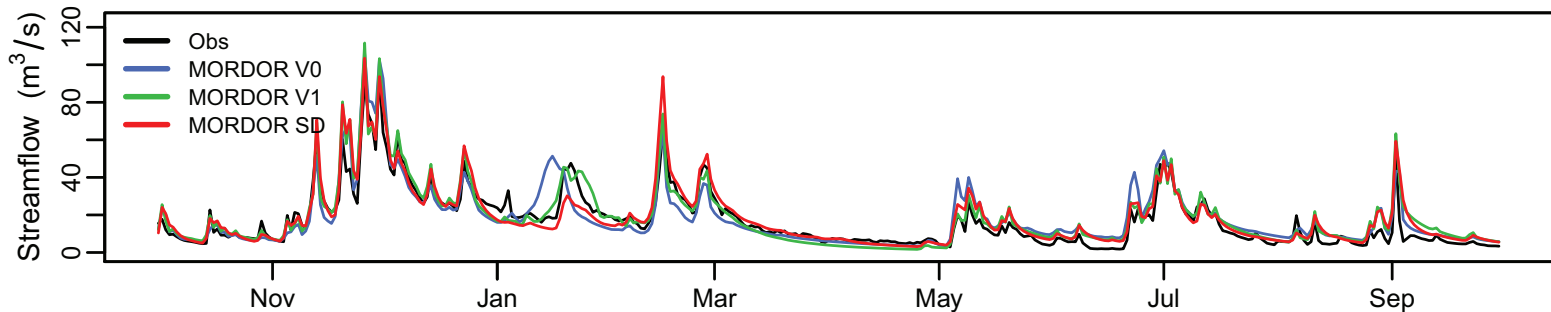



# Dordogne@Bort

Year 1998

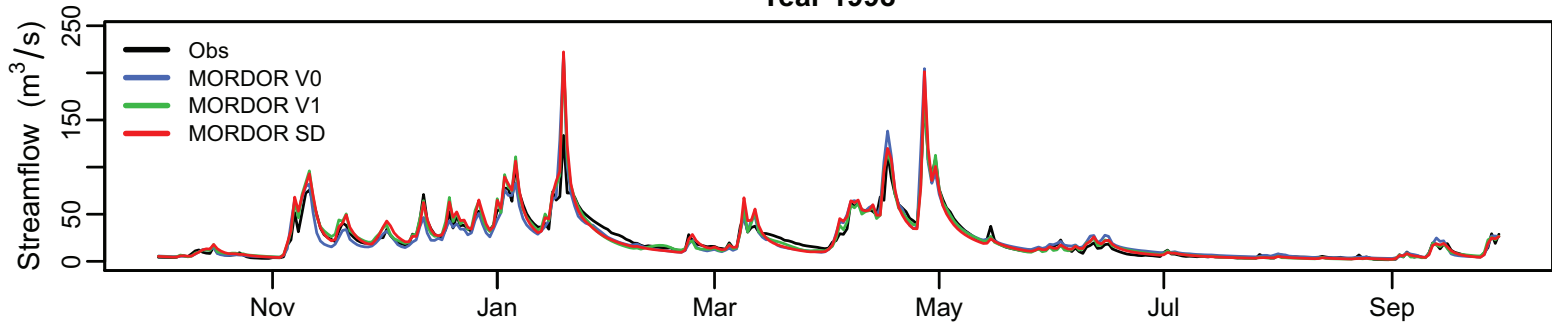

Year 1999

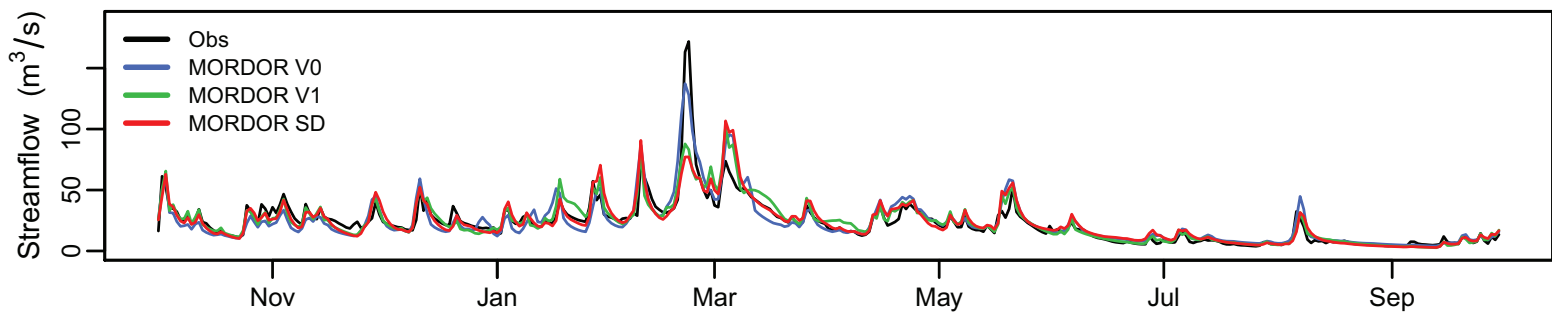

Year 2000

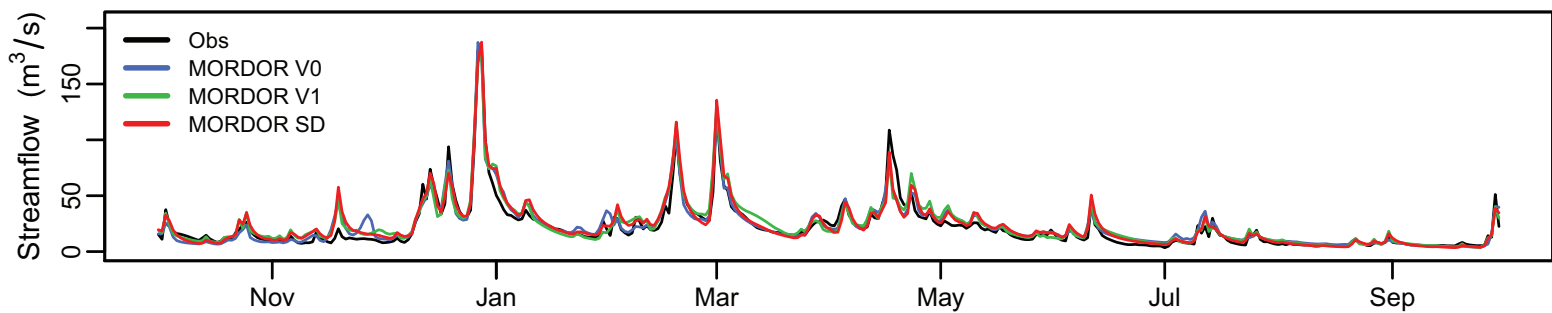

Year 2001

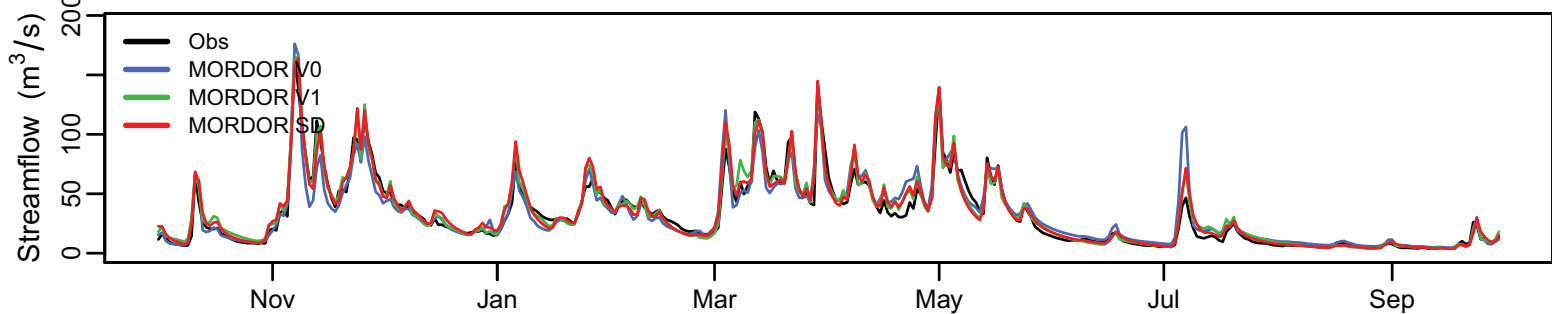

Year 2002

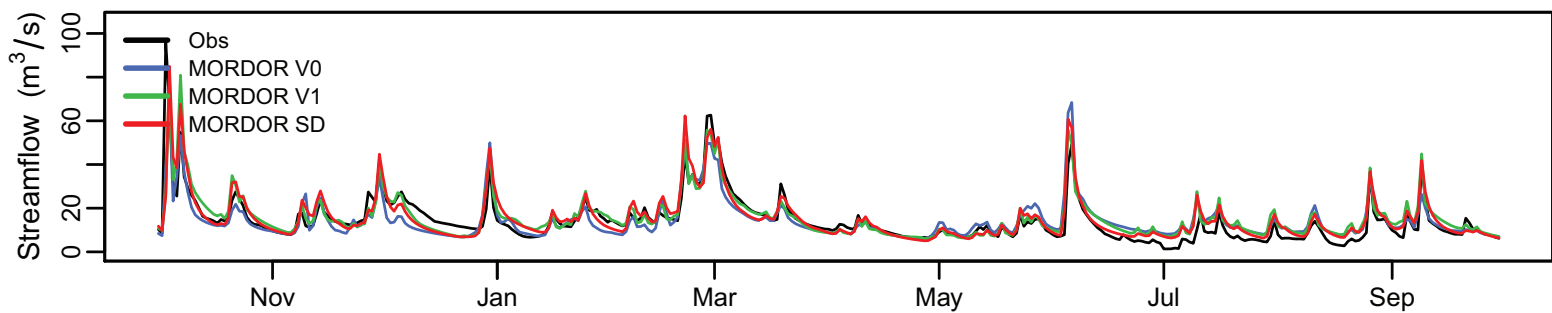

Year 2003

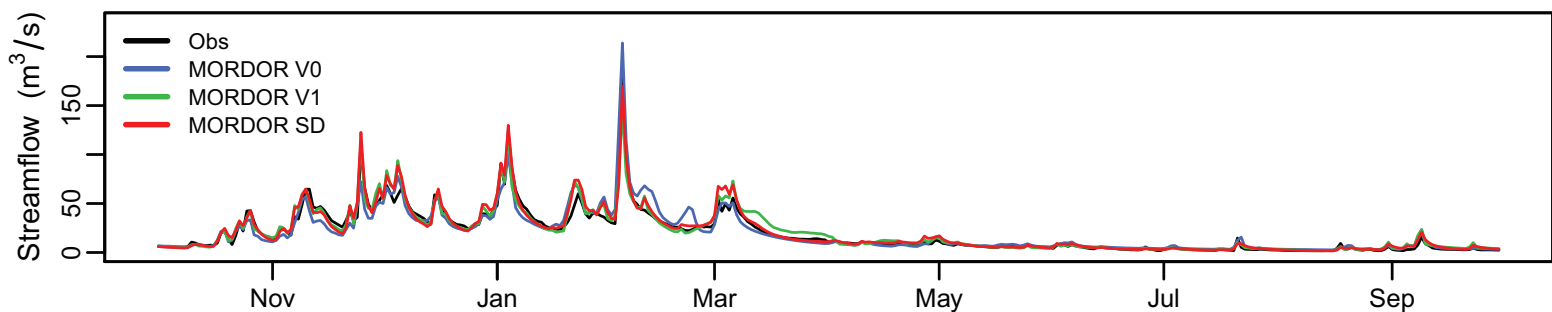

# Dordogne@Bort

Year 2004

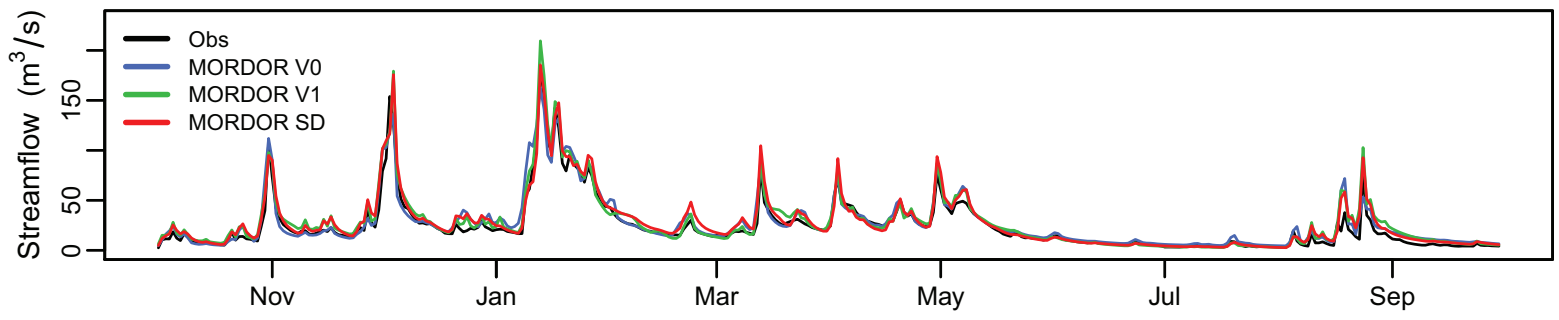

Year 2005

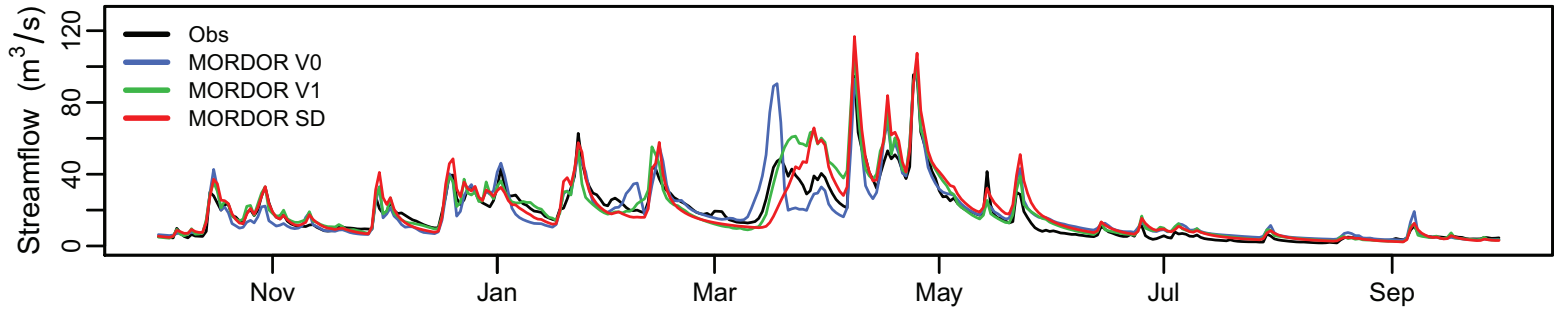

# Doubs@Brenet

Year 1963

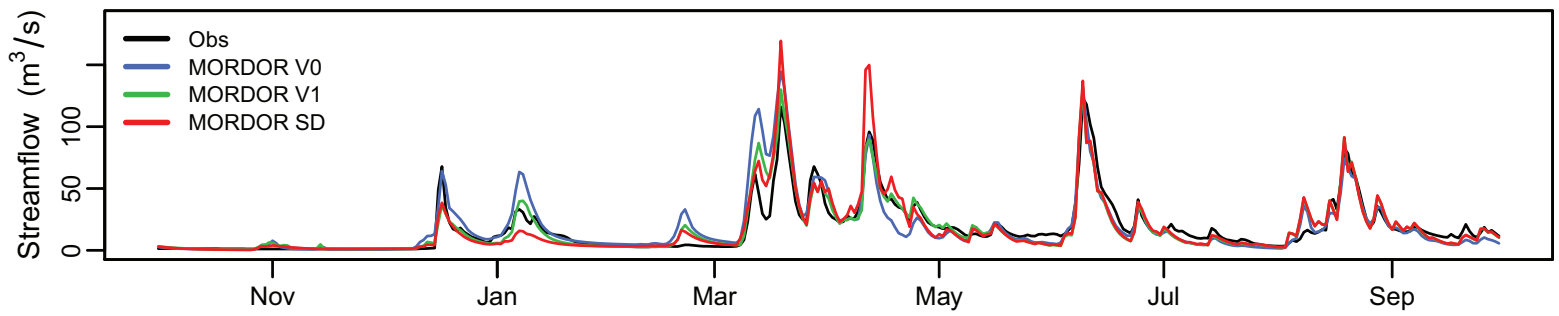

Year 1964

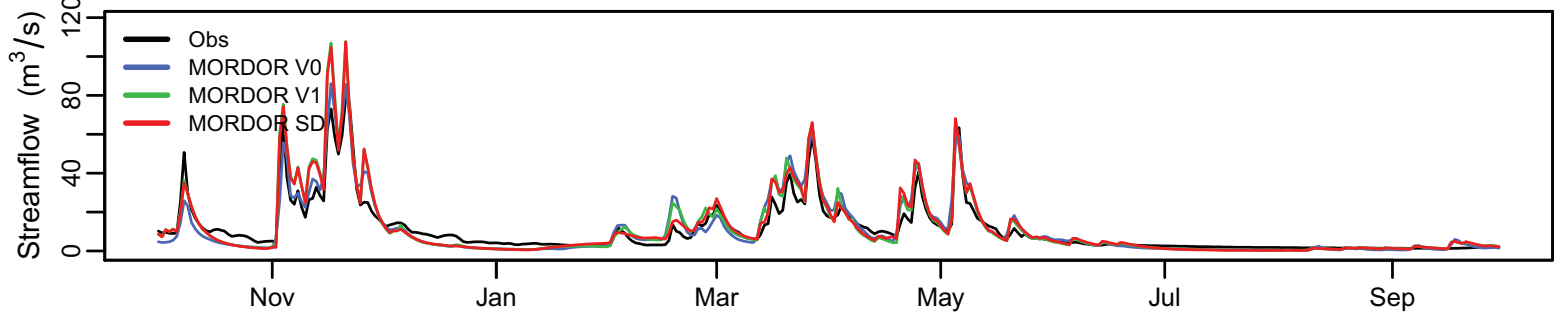

Year 1965

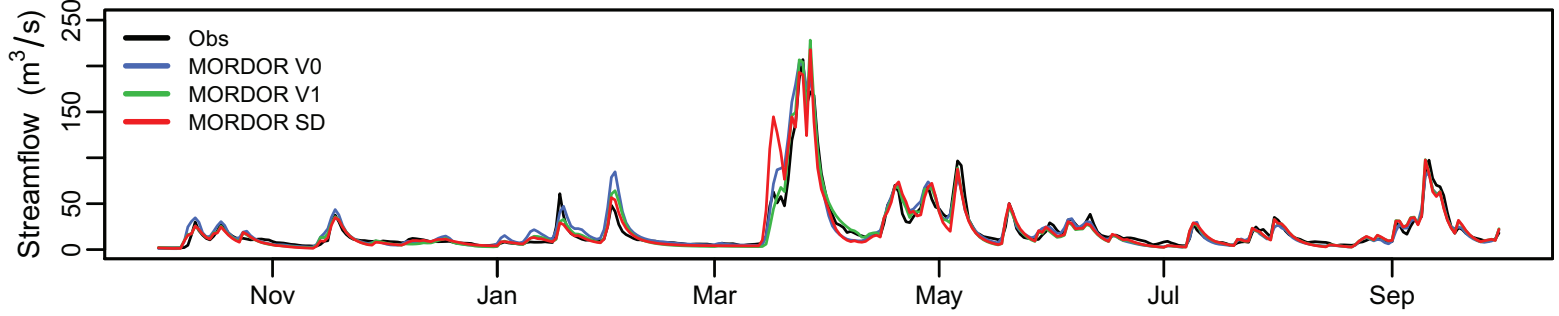

Year 1966

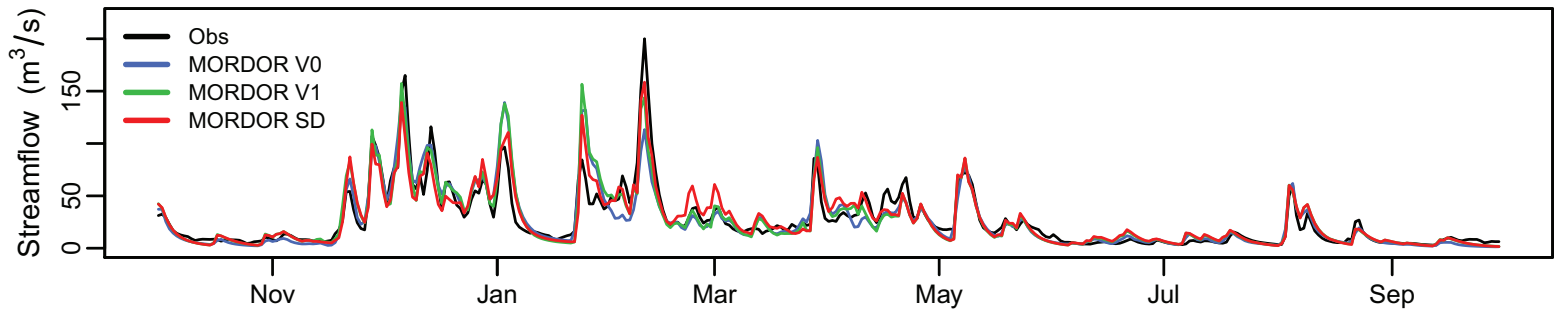

Year 1967

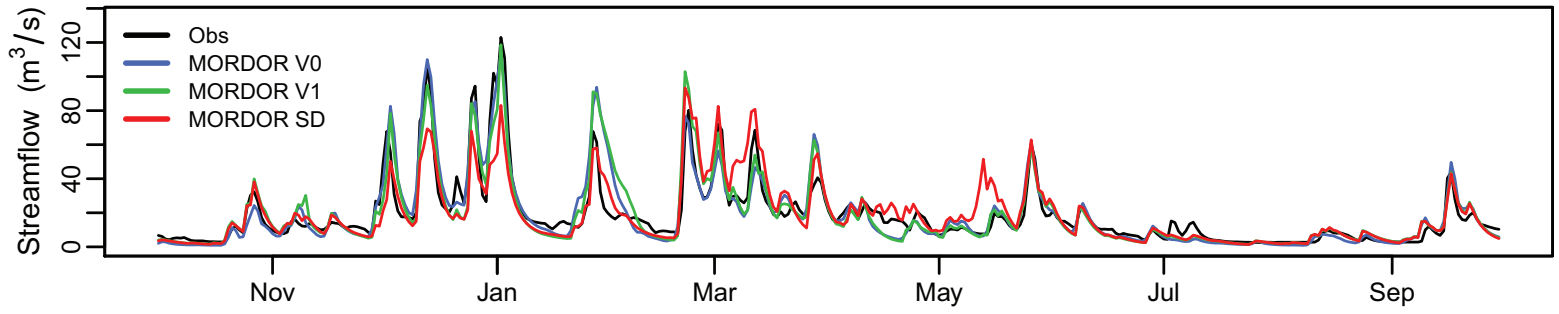

Year 1968

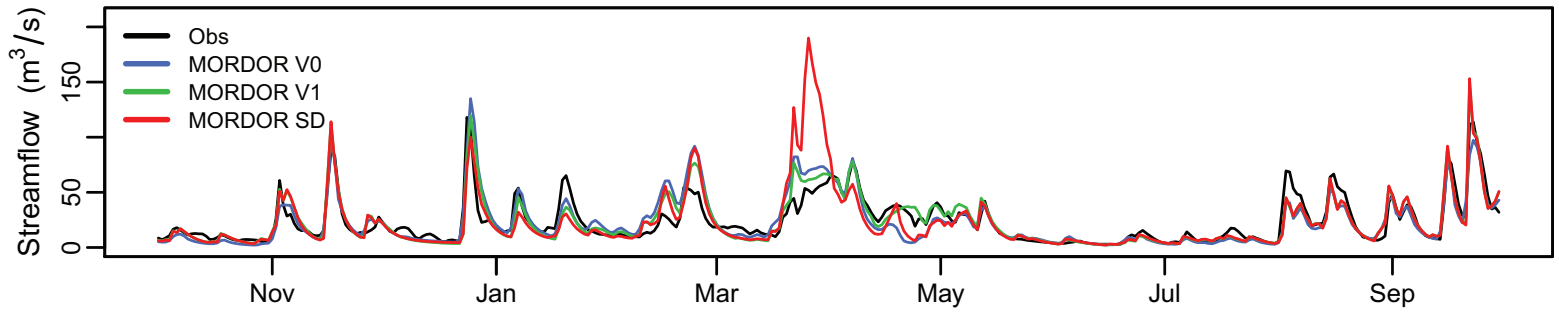

# Doubs@Brenet

Year 1969

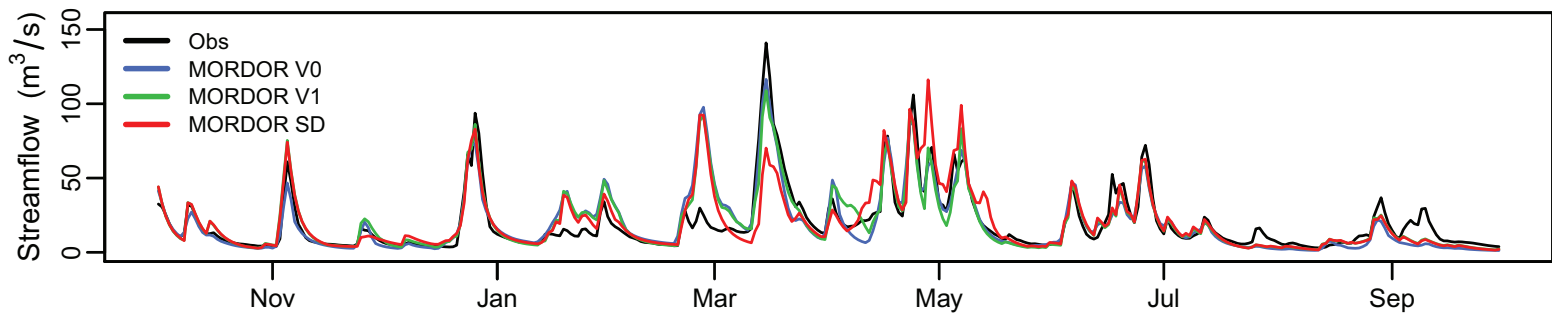

Year 1970

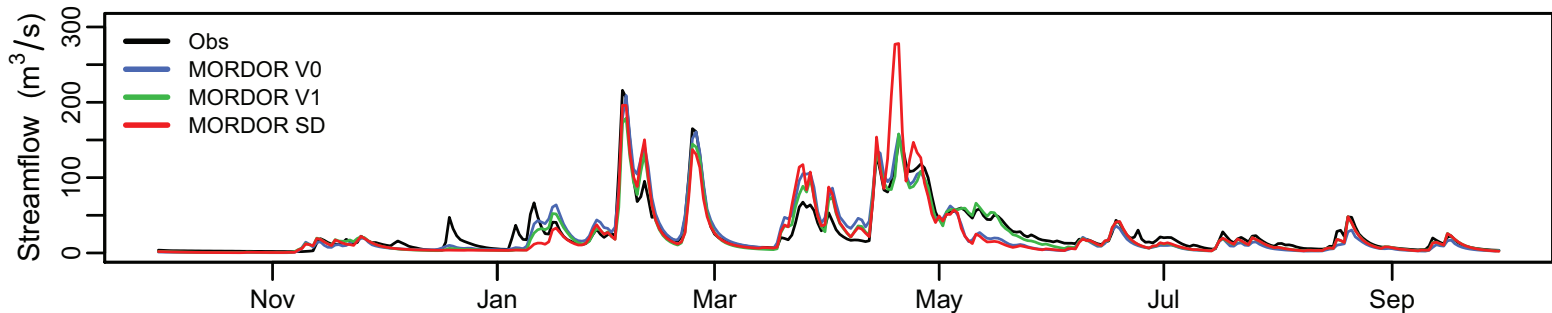

Year 1971

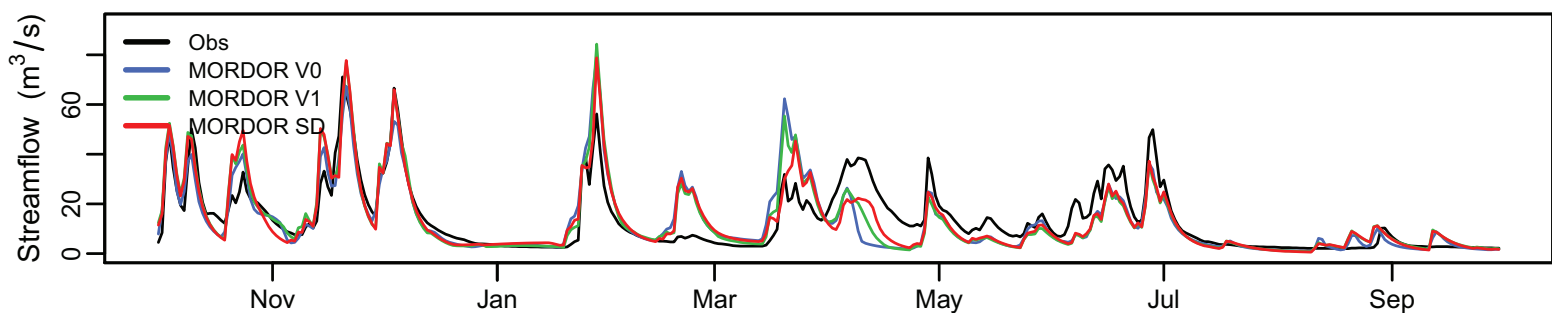

Year 1972

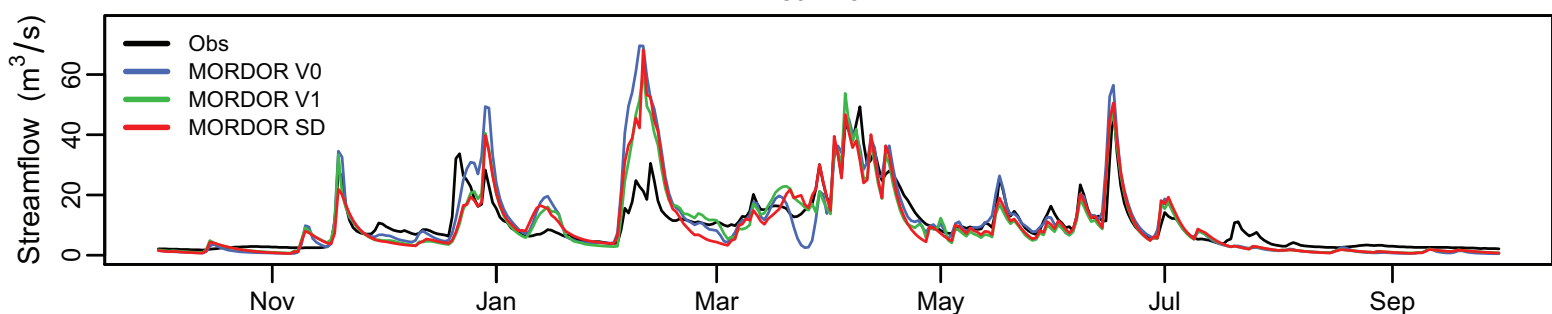

Year 1973

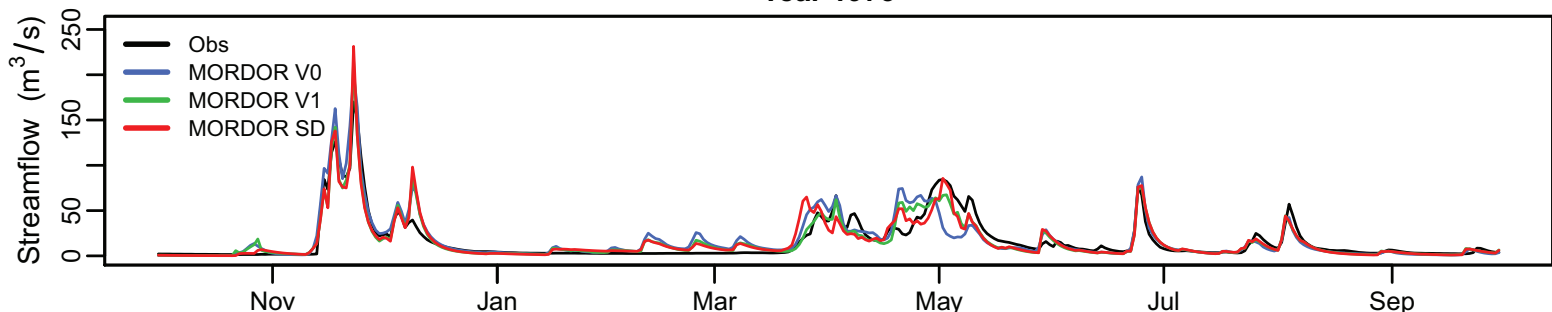

Year 1974

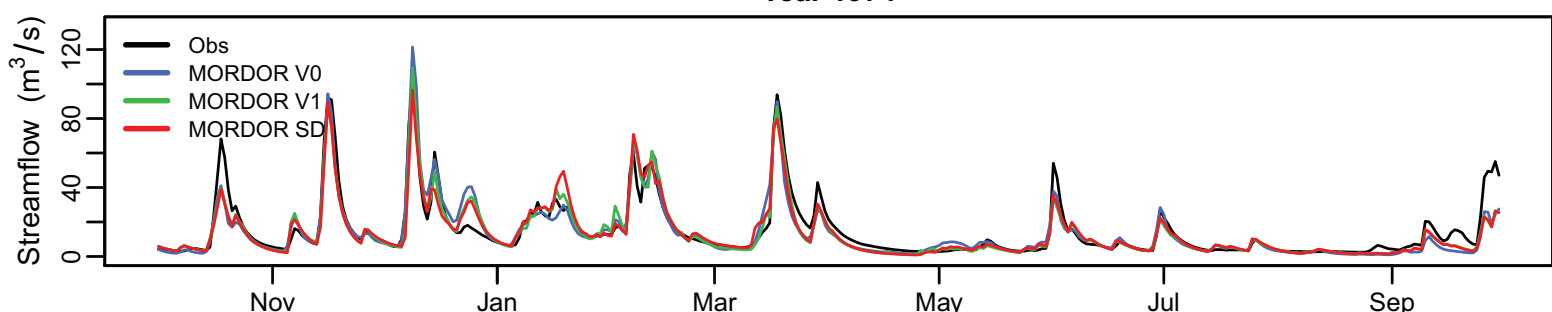

# Doubs@Brenet

Year 1975

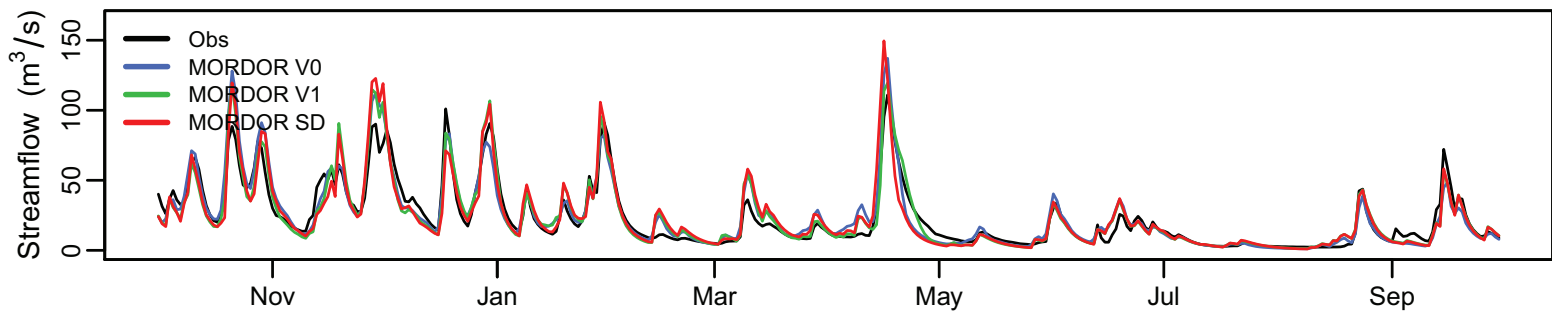

Year 1976

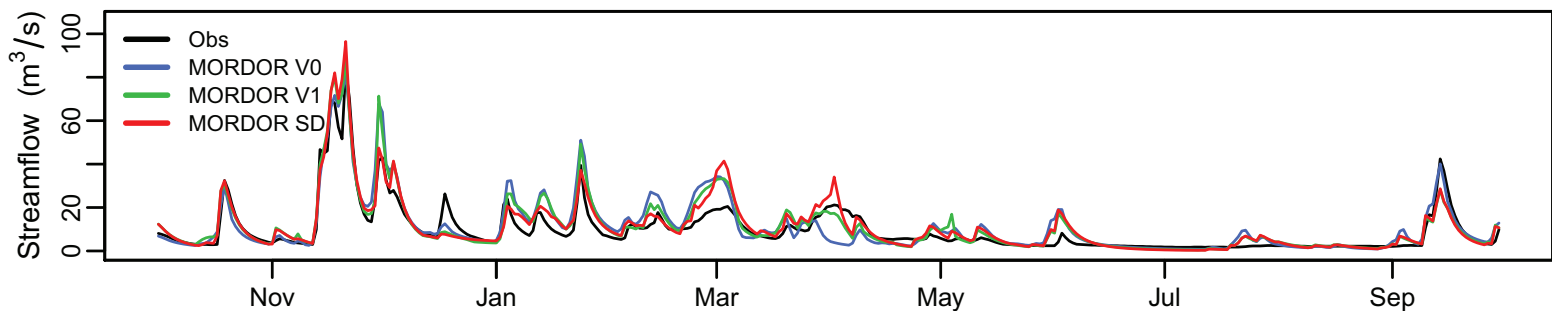

Year 1977

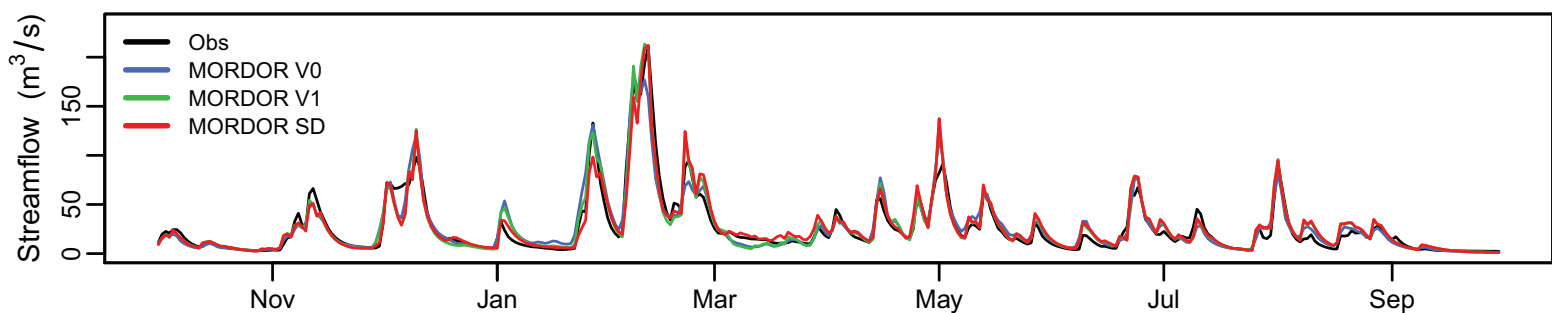

Year 1978

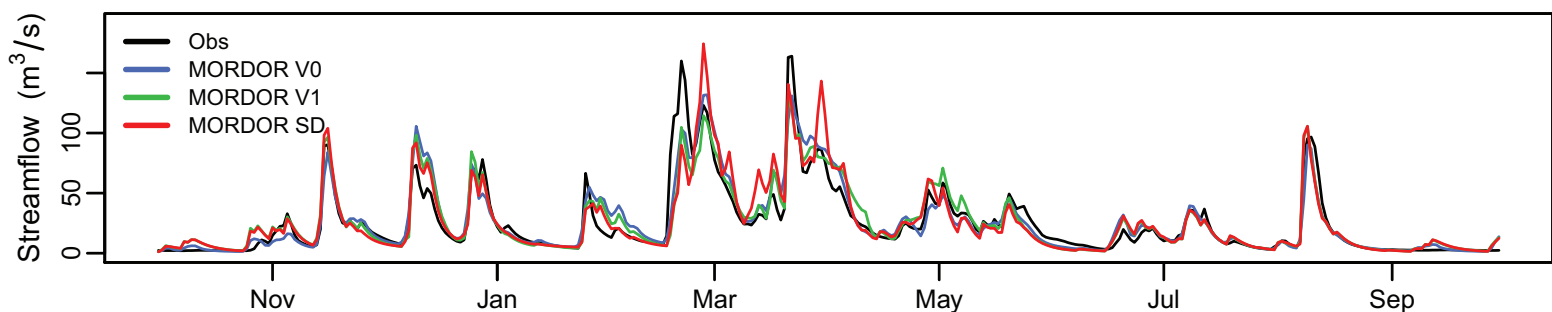

Year 1979

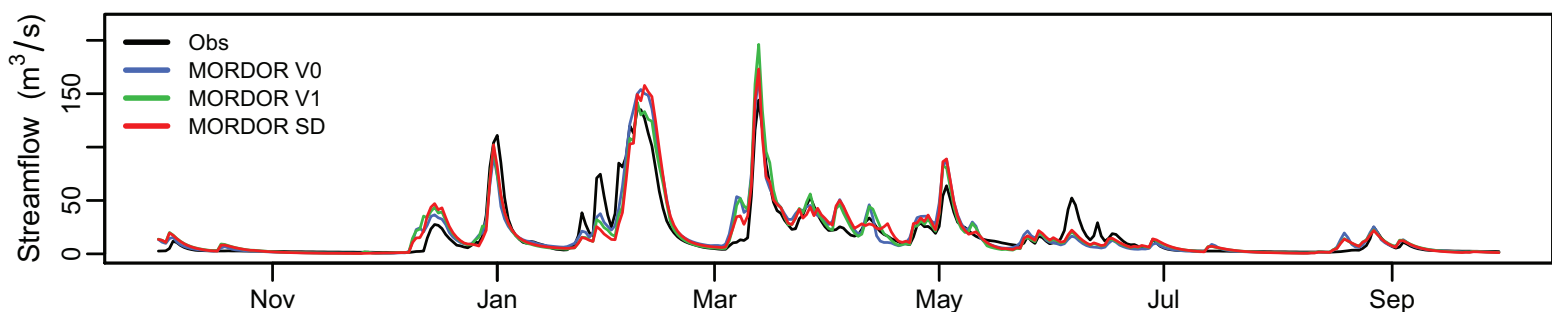

Year 1980

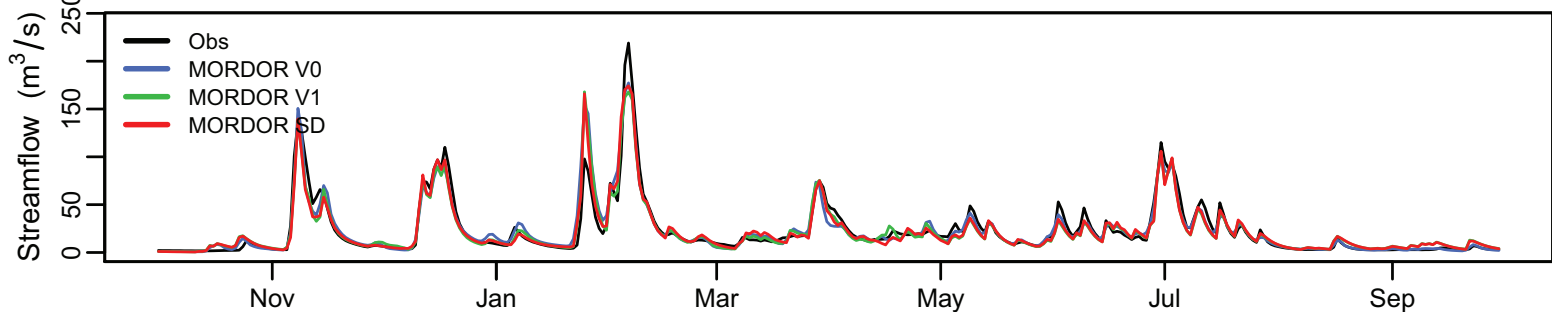

# Doubs@Brenet

Year 1981

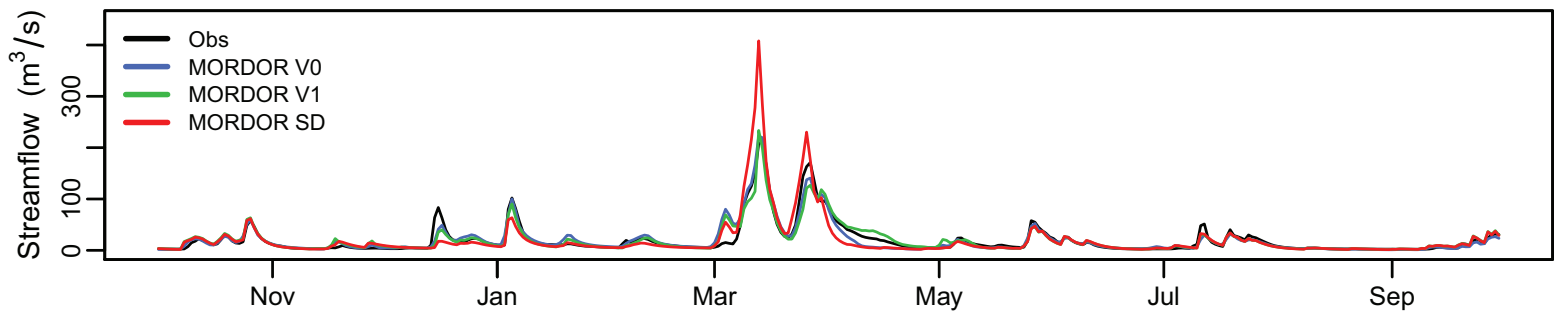

Year 1982

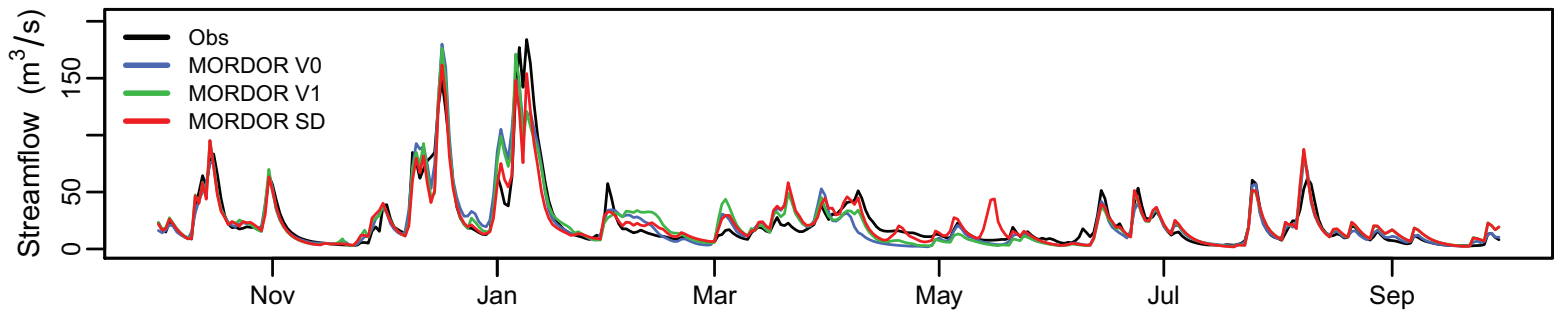

Year 1983

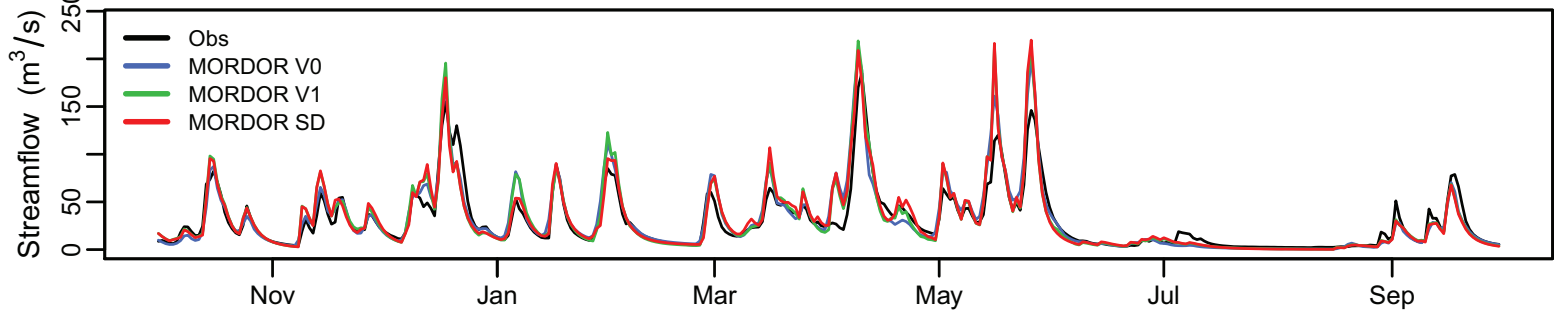

Year 1984

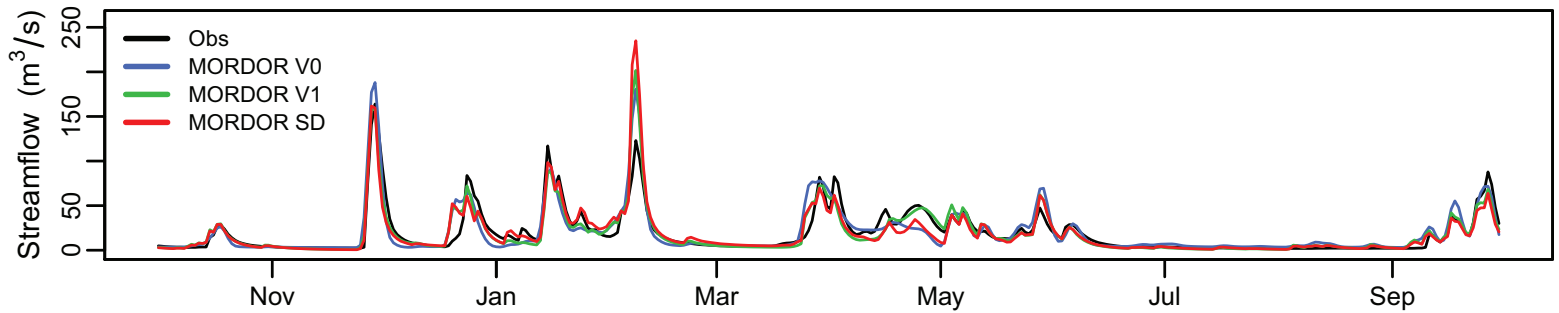

Year 1985

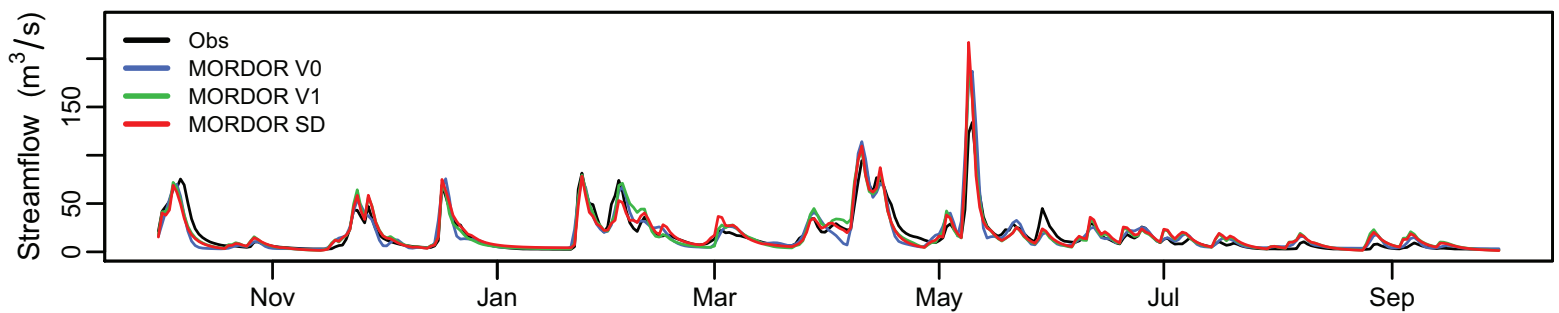

Year 1986

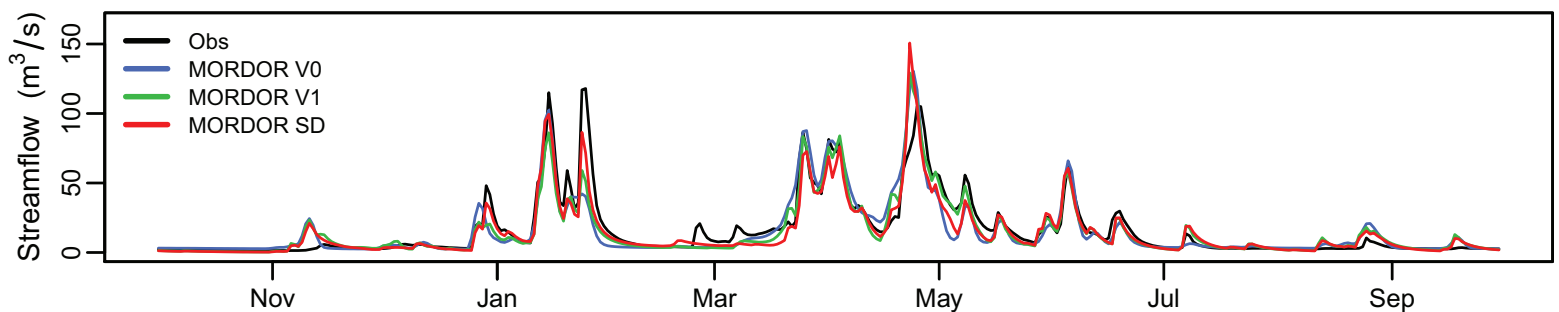

# Doubs@Brenet

Year 1987

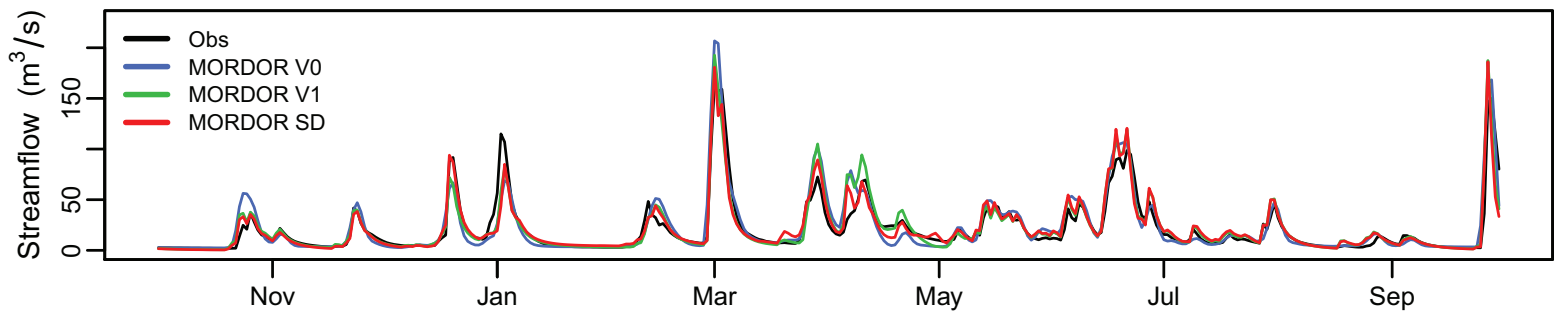

Year 1988

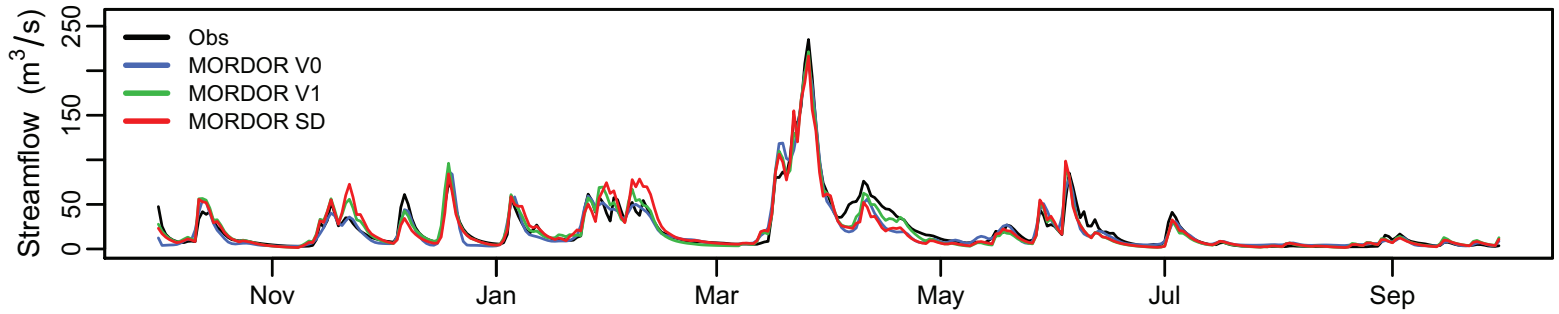

Year 1989

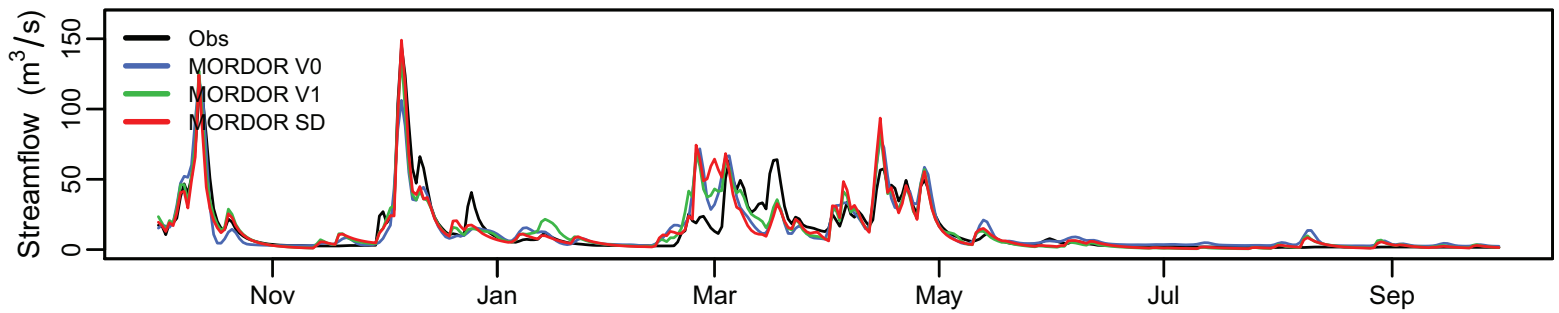

Year 1990

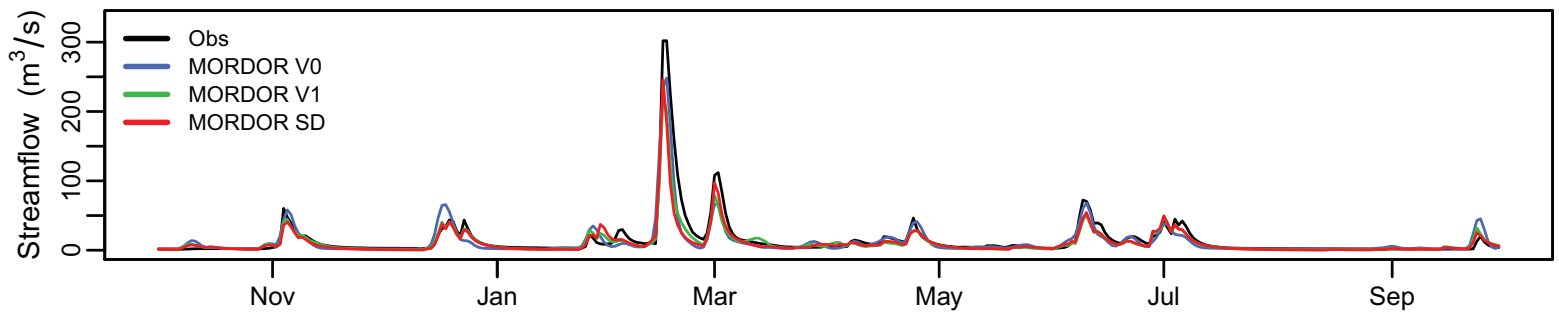

Year 1991

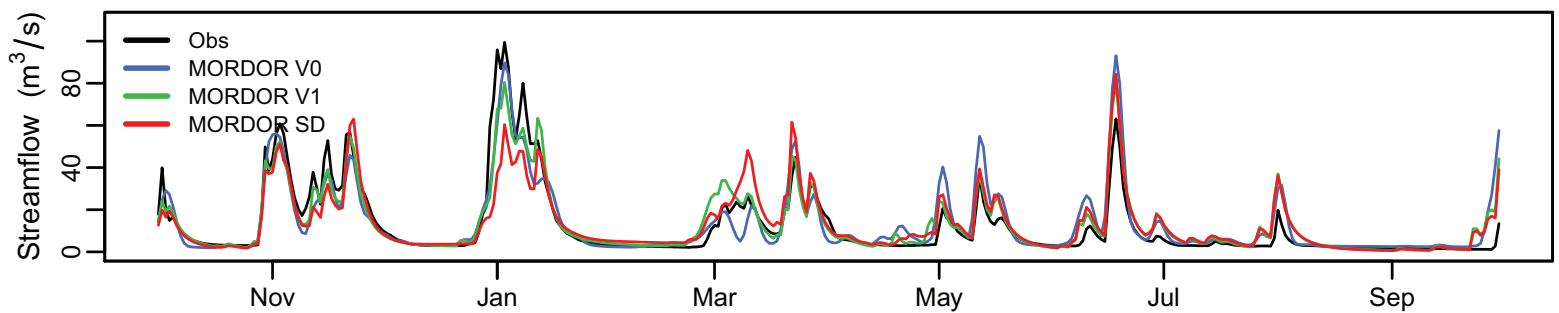

Year 1992

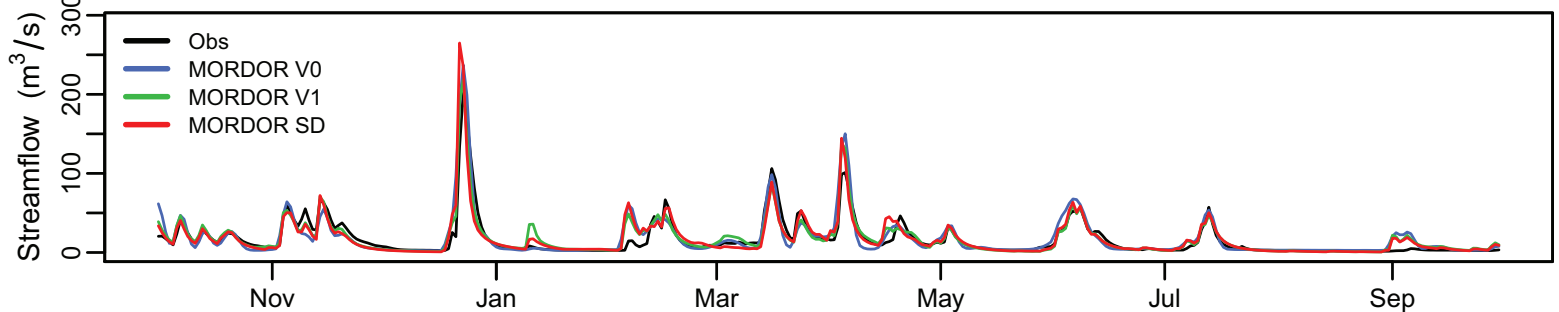

# Doubs@Brenet

Year 1993

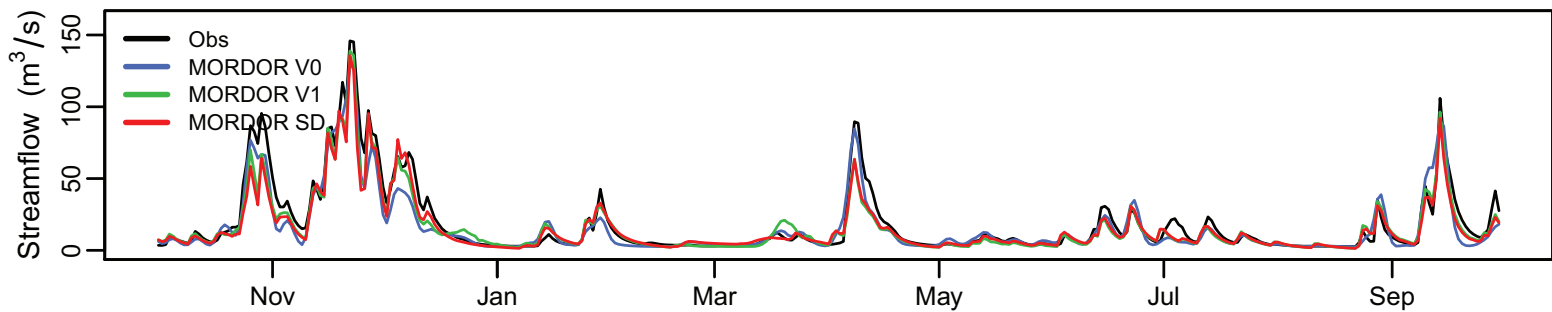

Year 1994

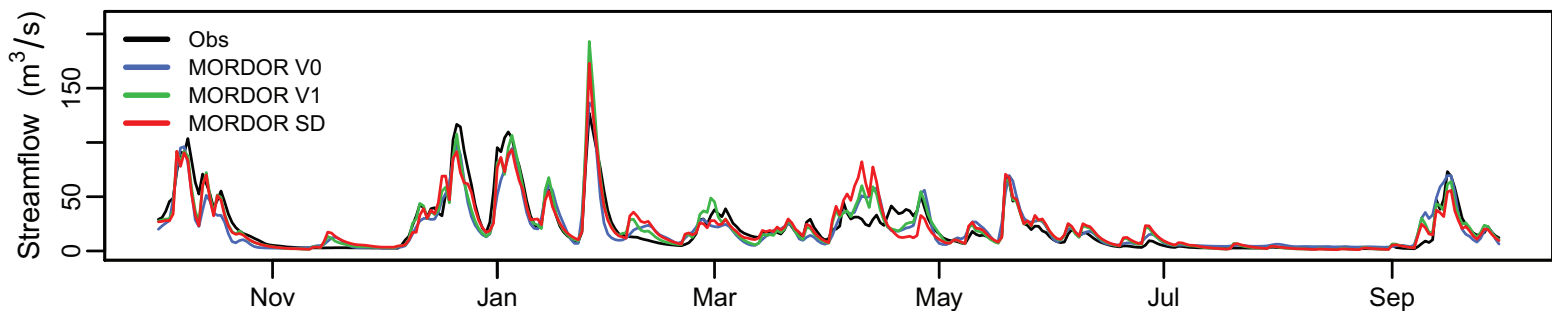

Year 1995

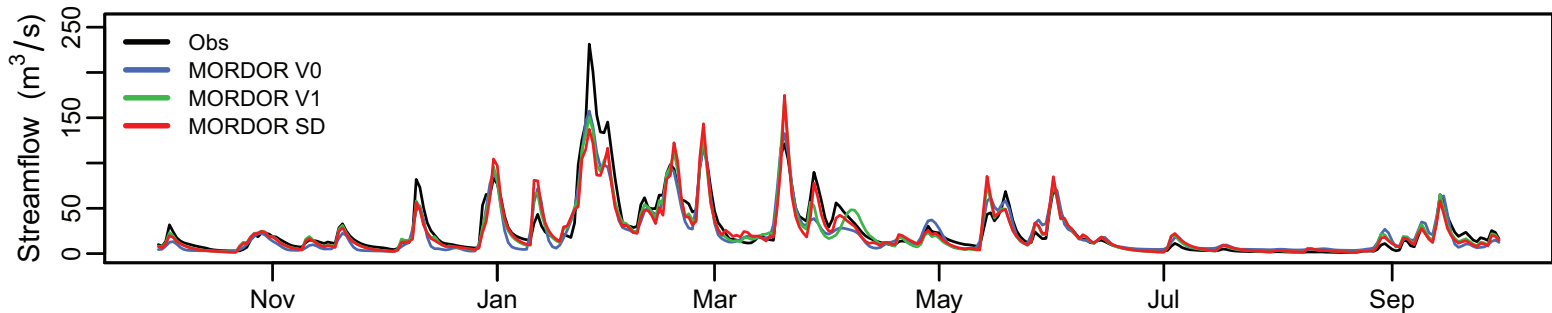

Year 1996

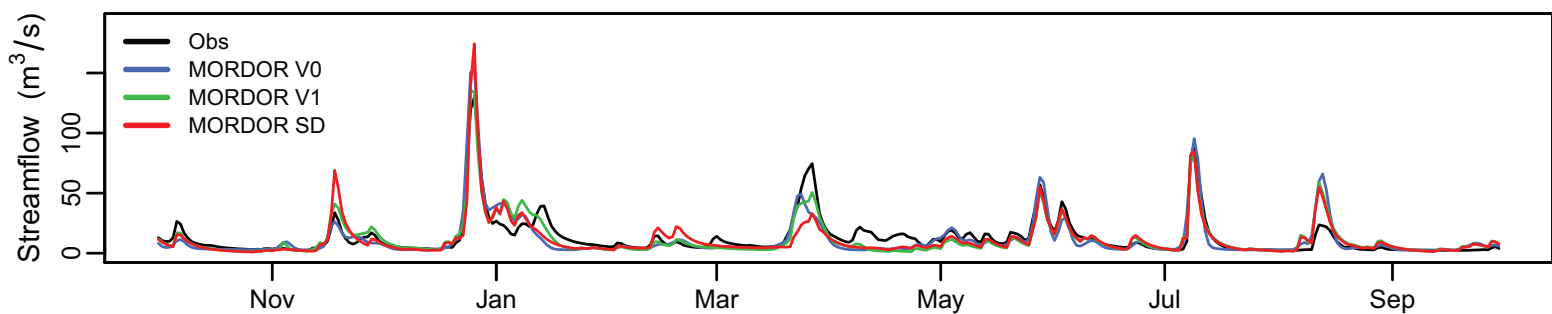

Year 1997

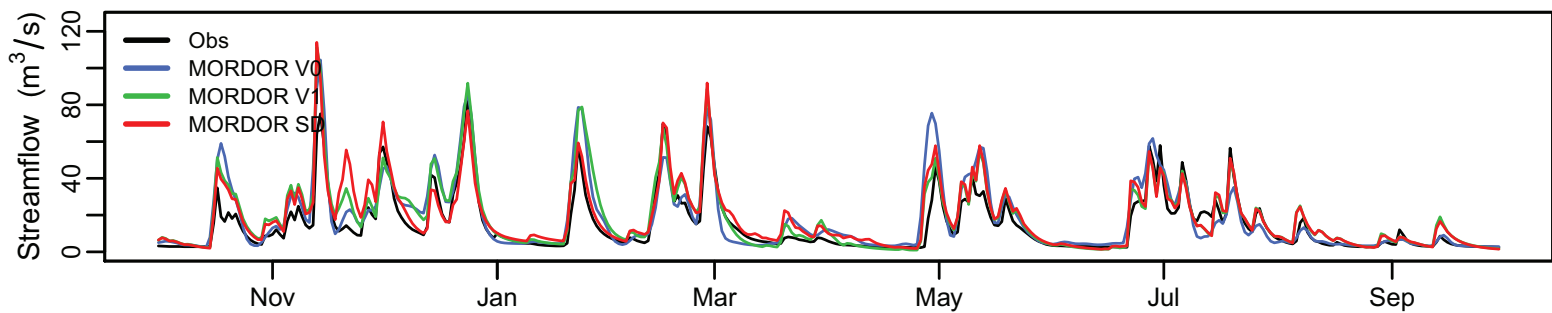

Year 1998

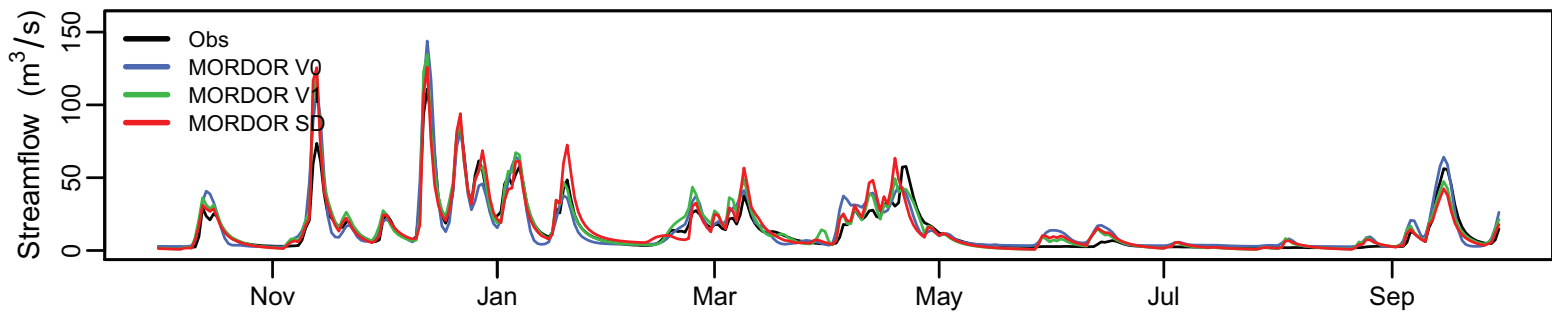



# Doubs@Brenet

Year 1999

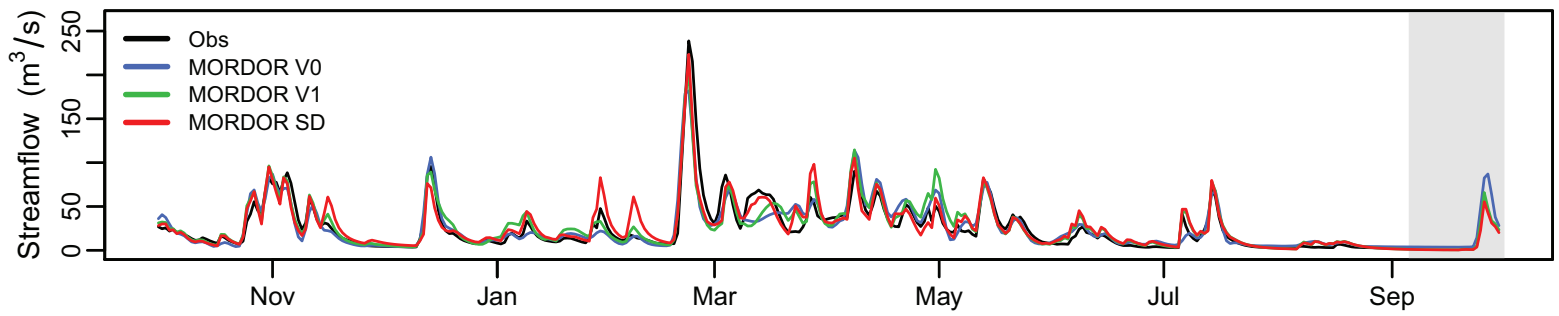

Year 2000

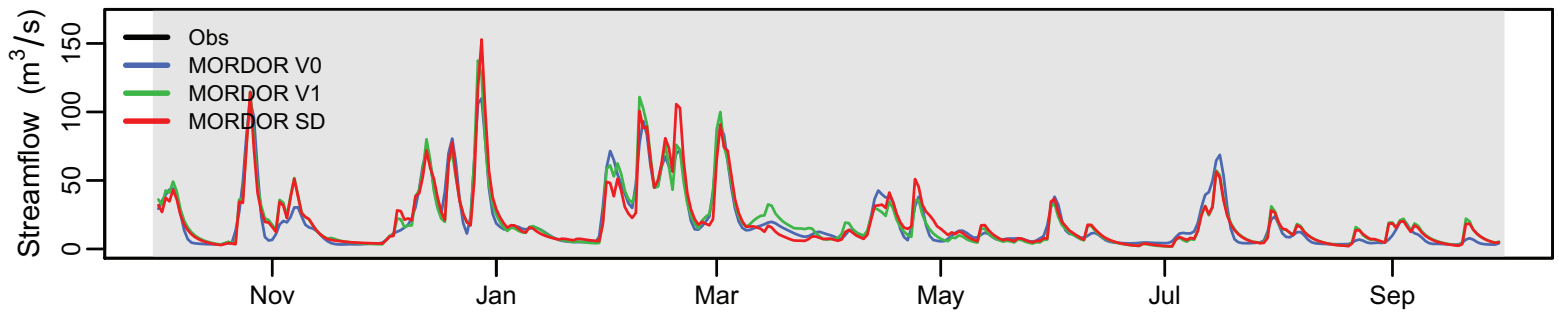

Year 2001

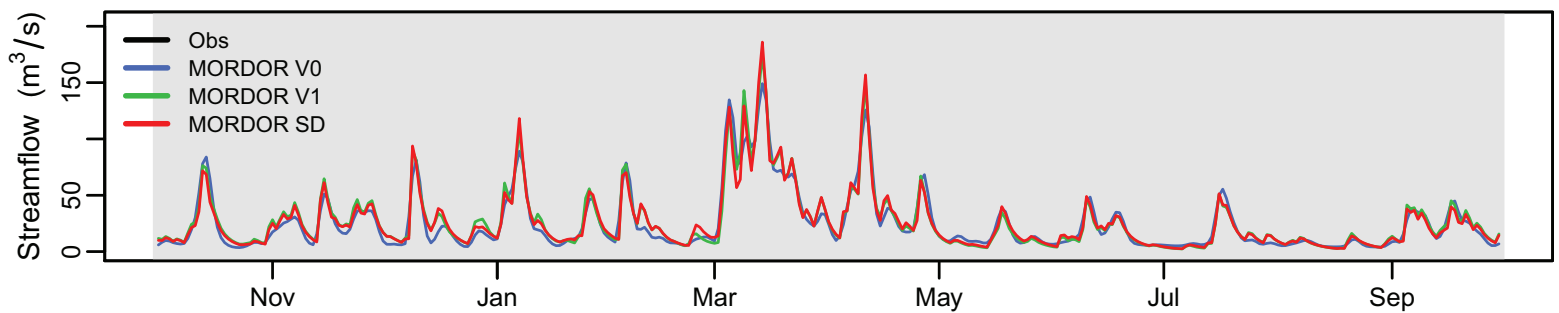

Year 2002

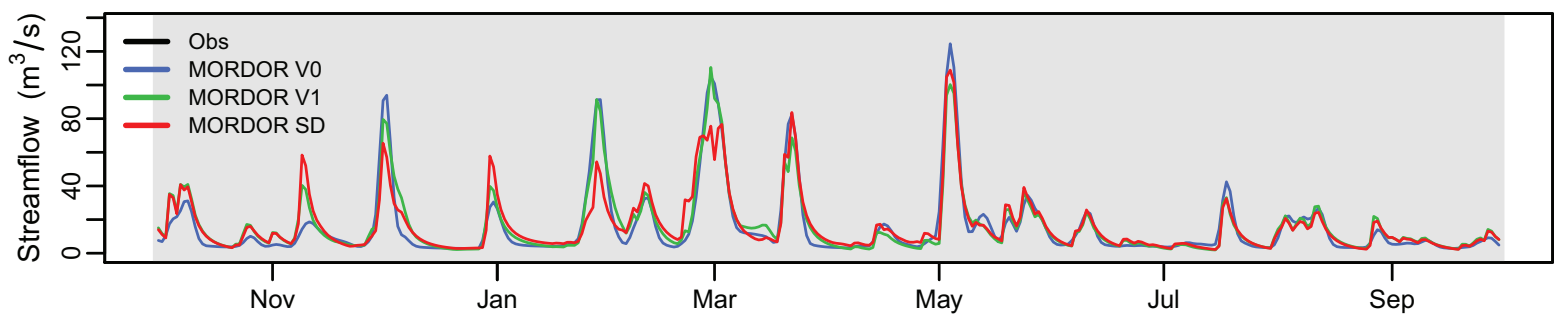

Year 2003

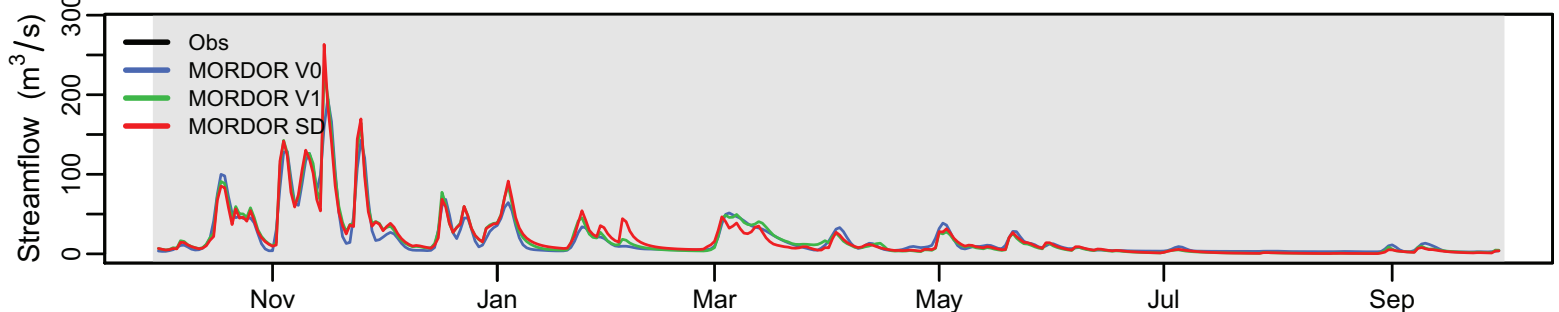

Year 2004

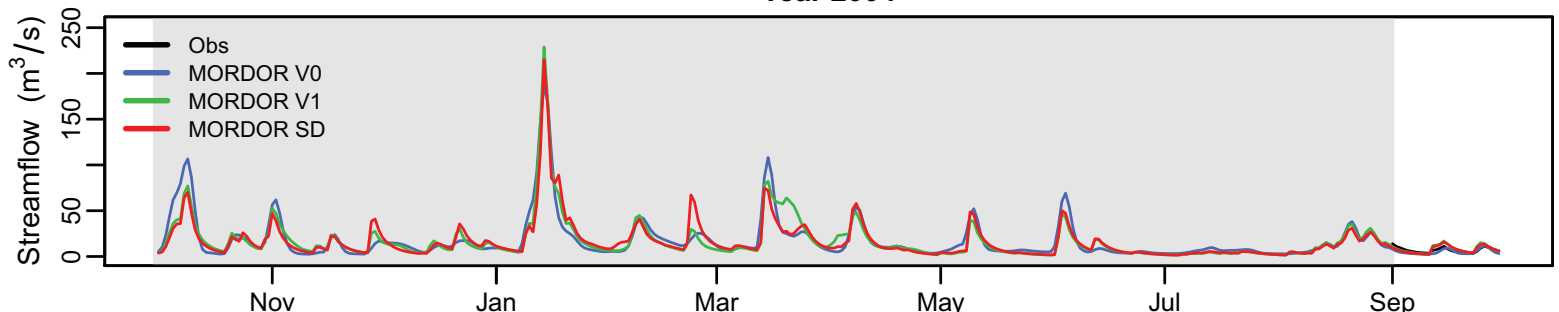

# Doubs@Neublans

Year 1968

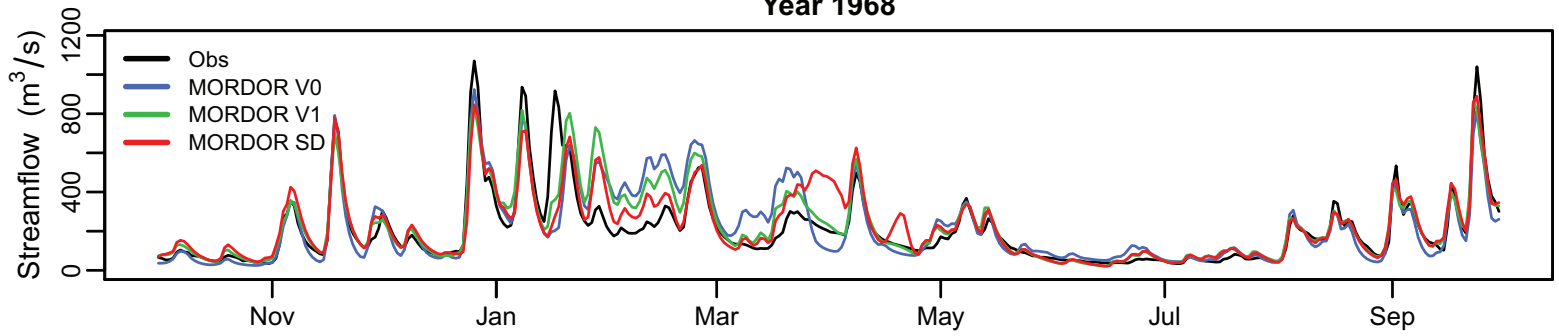

Year 1969

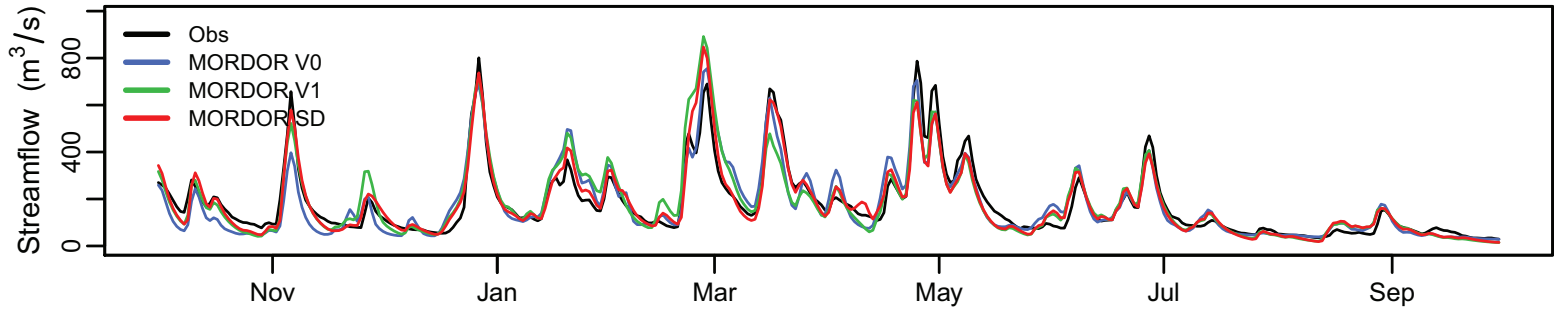

Year 1970

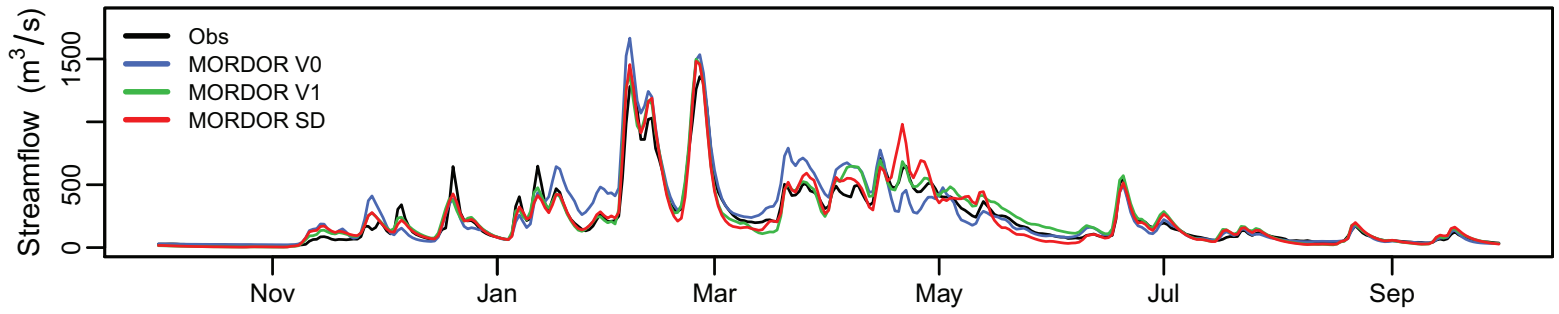

Year 1971

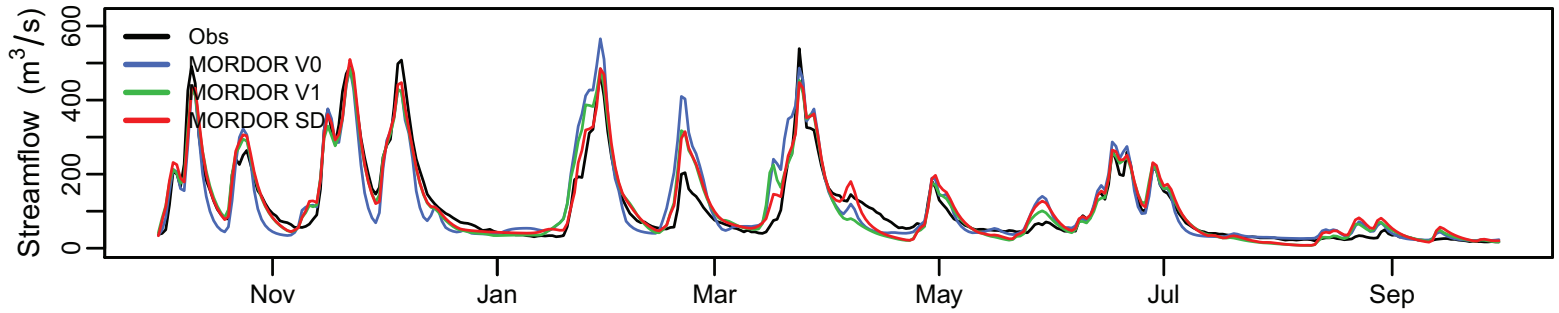

Year 1972

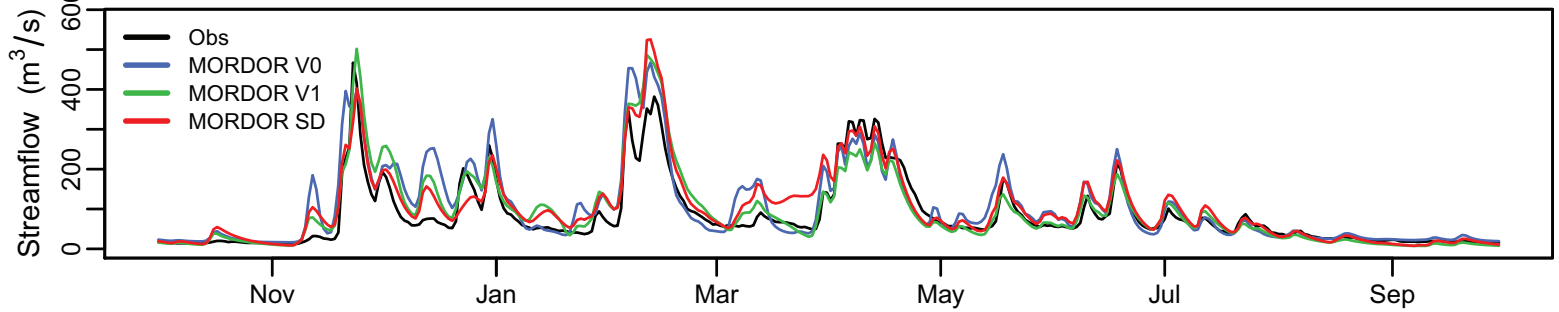

Year 1973

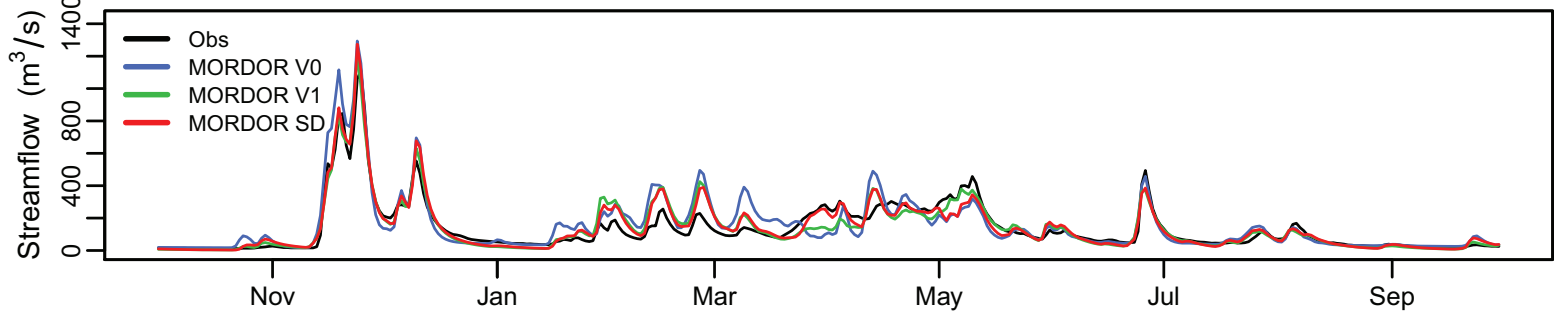

# Doubs@Neublans

Year 1974

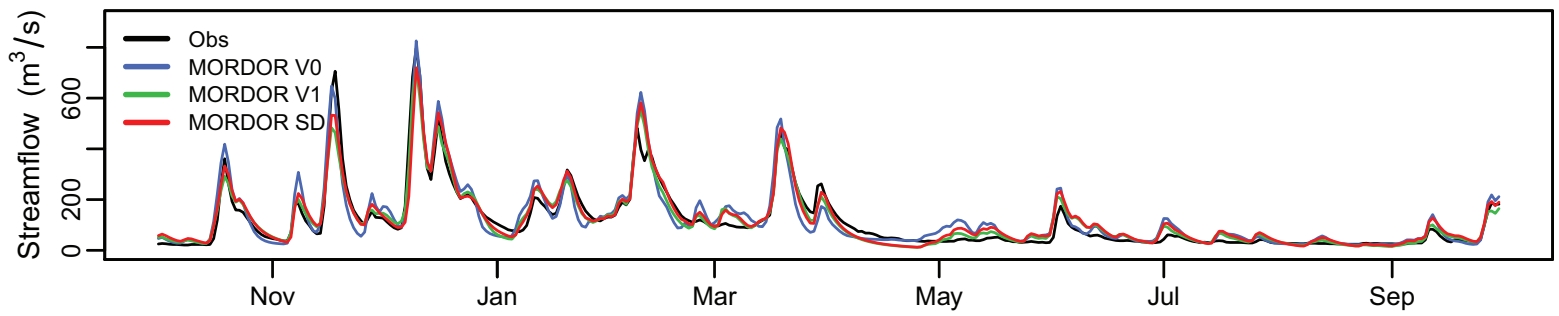

Year 1975

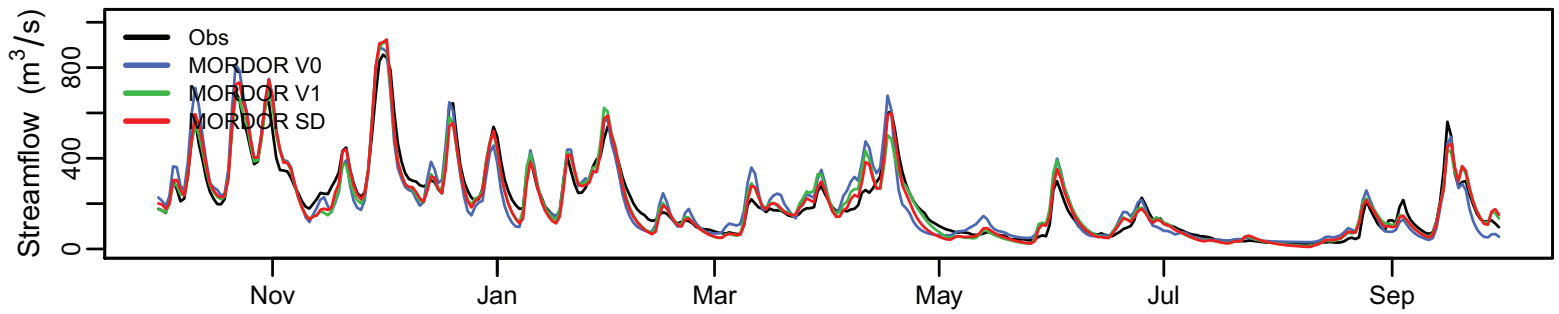

Year 1976

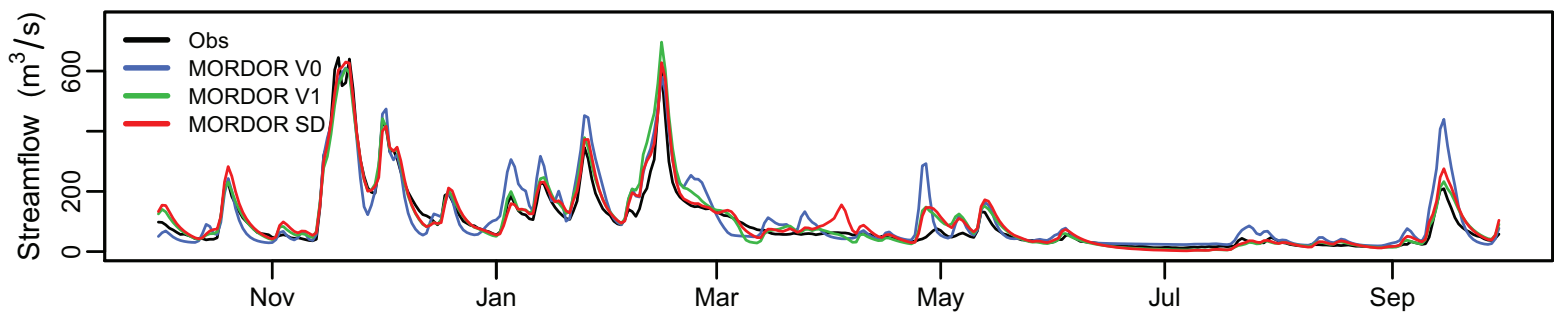

Year 1977

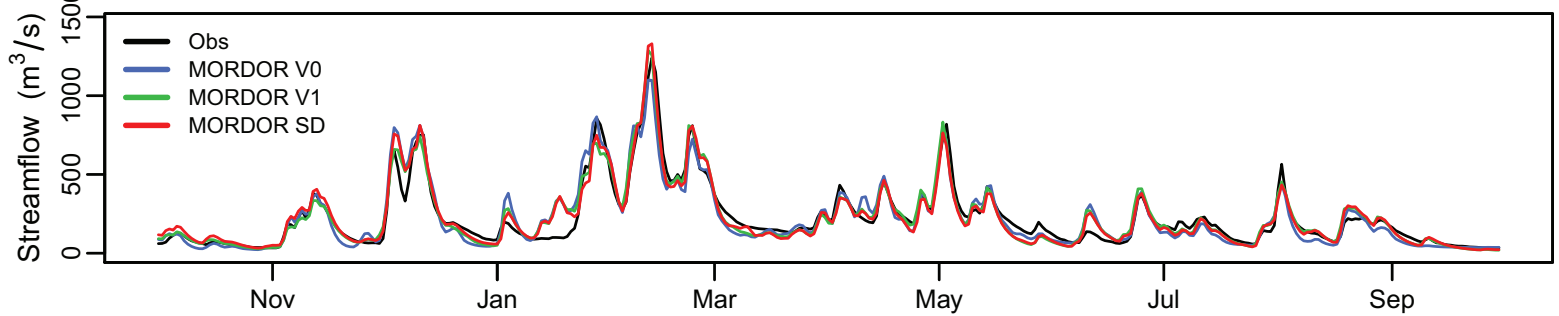

Year 1978

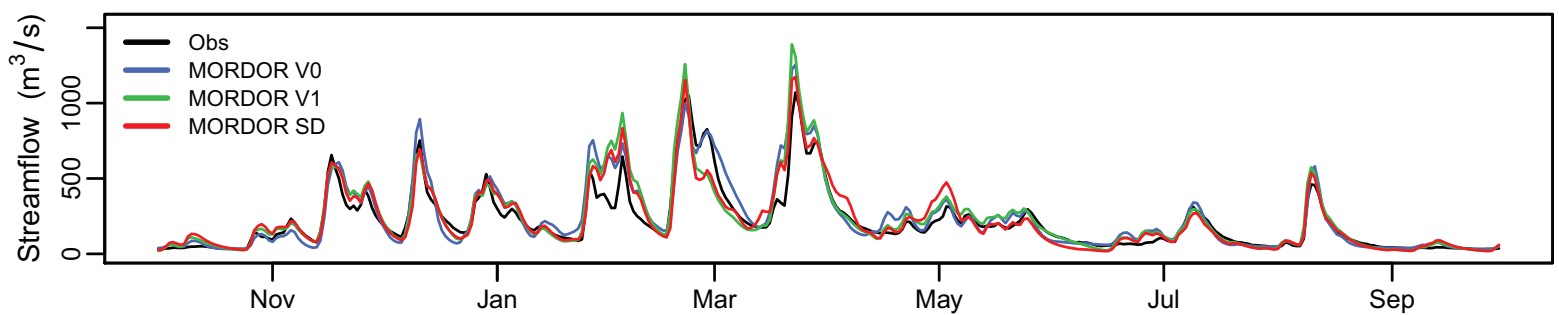

Year 1979

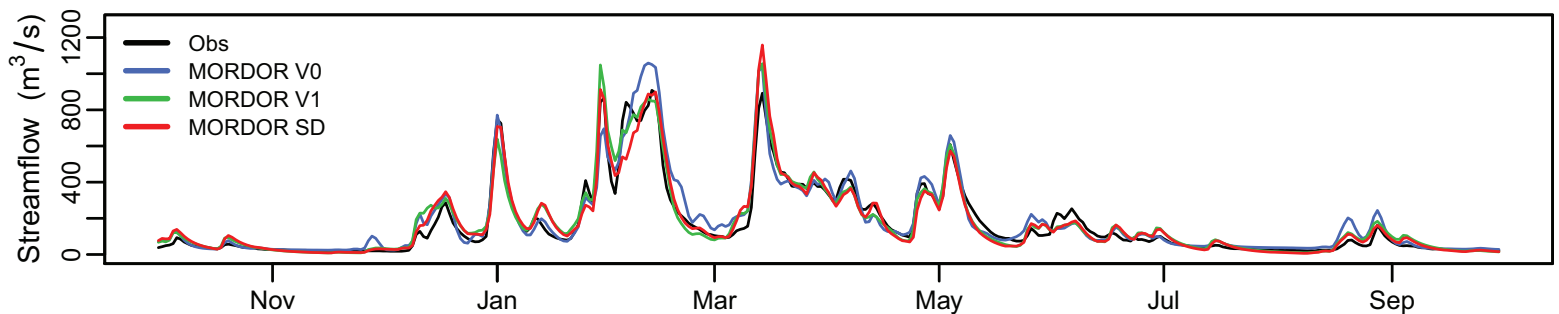

# Doubs@Neublans

Year 1980

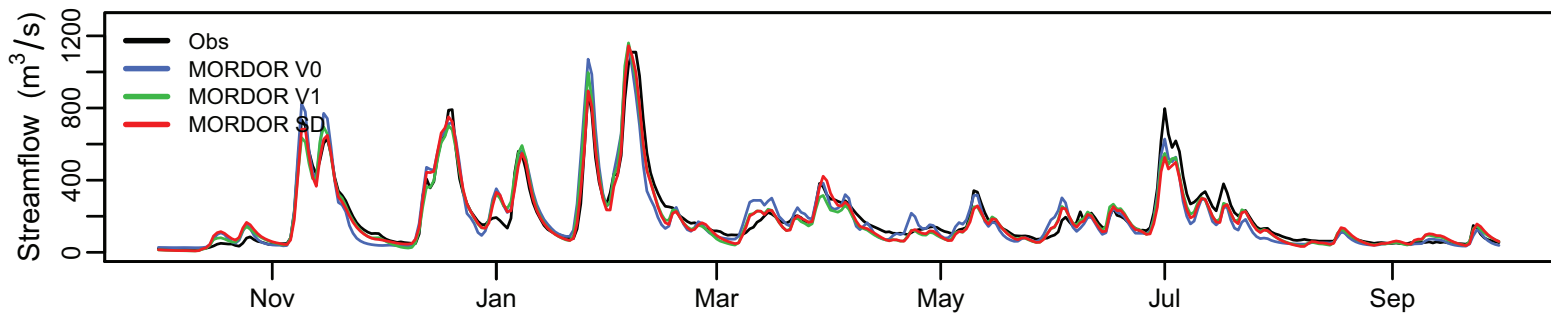

Year 1981

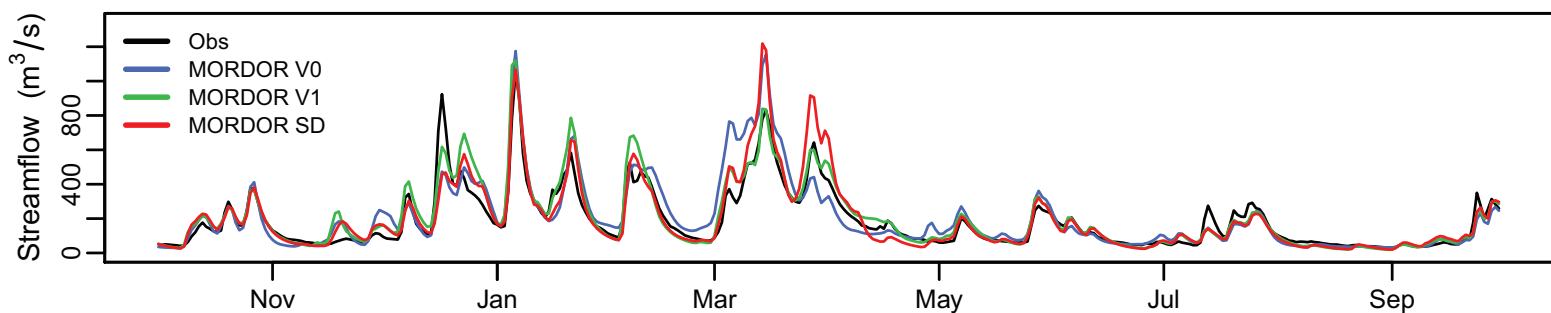

Year 1982

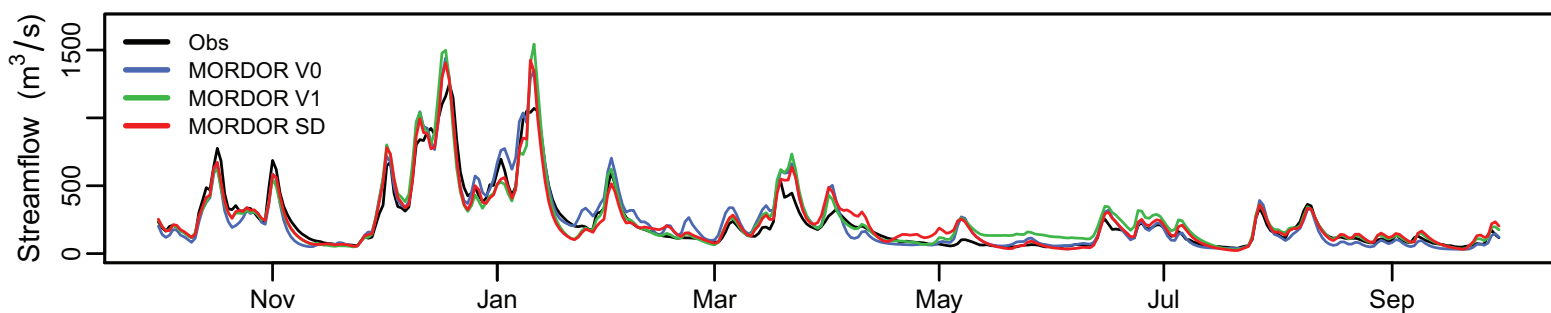

Year 1983

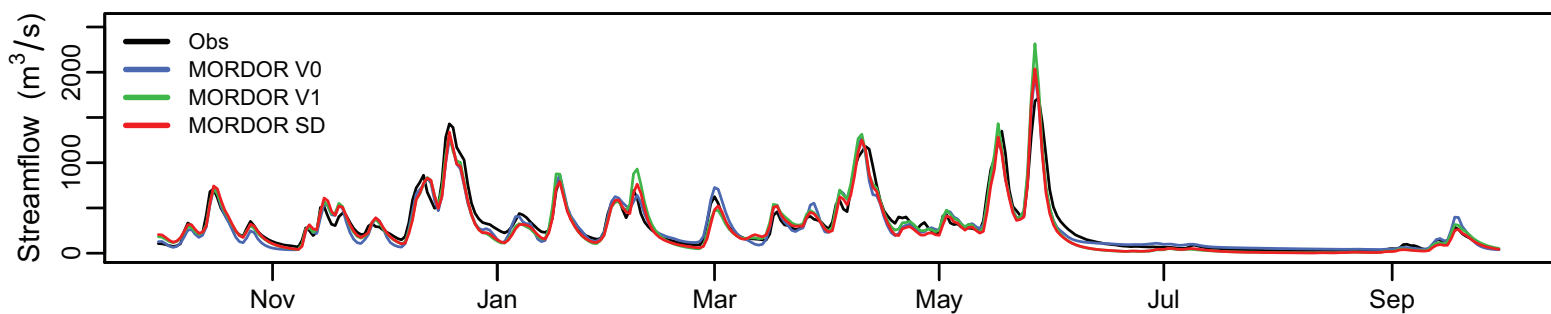

Year 1984

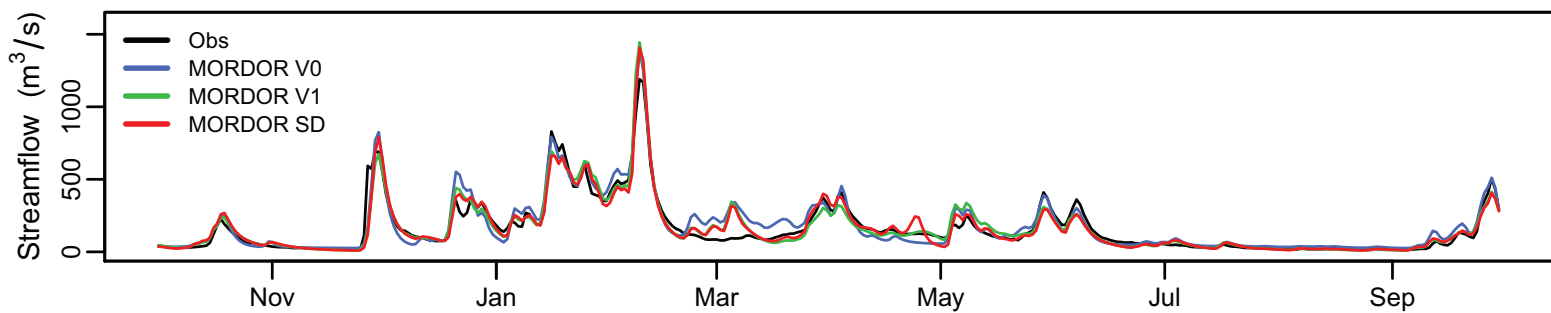

Year 1985

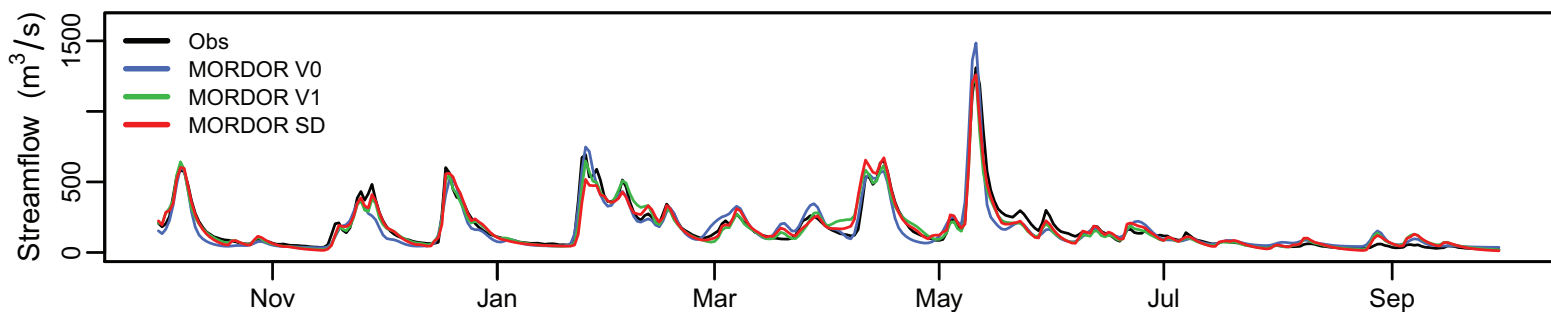

# Doubs@Neublans

Year 1986

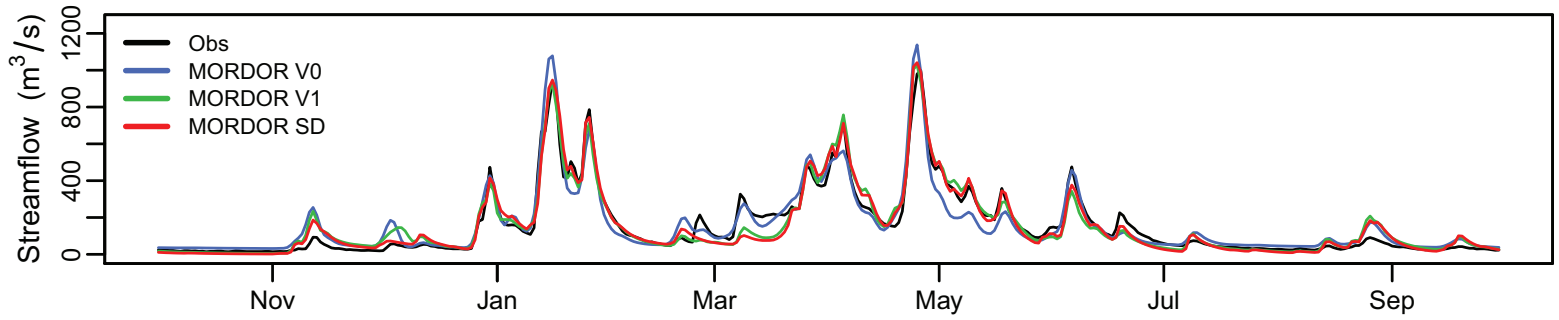

Year 1987

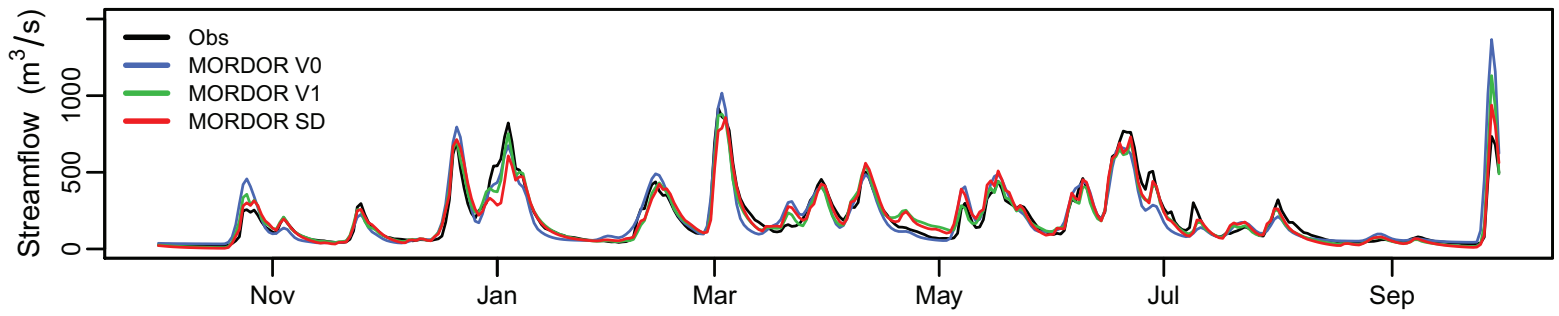

Year 1988

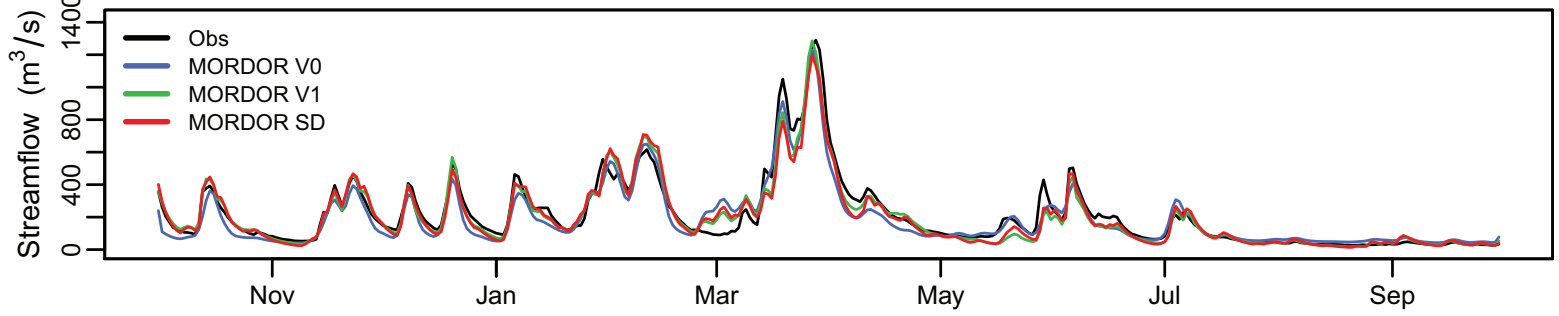

Year 1989

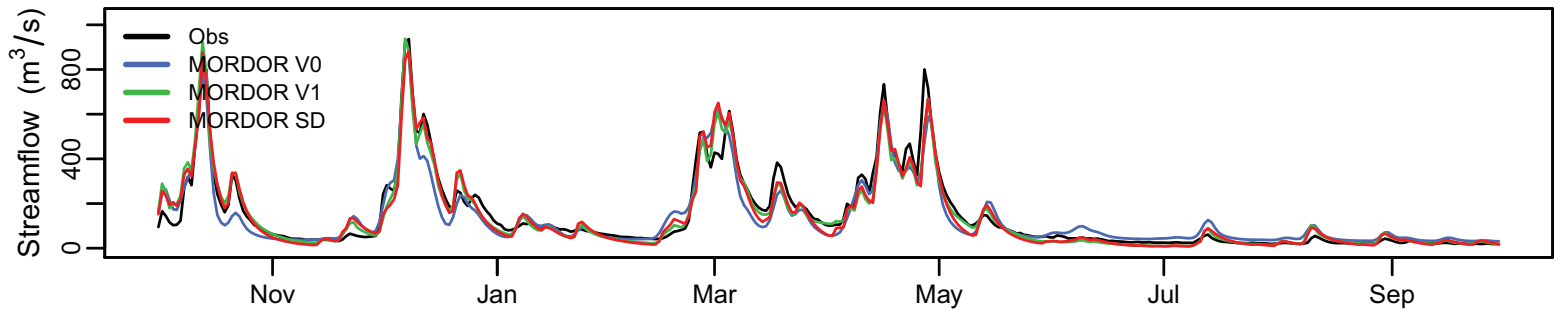

Year 1990

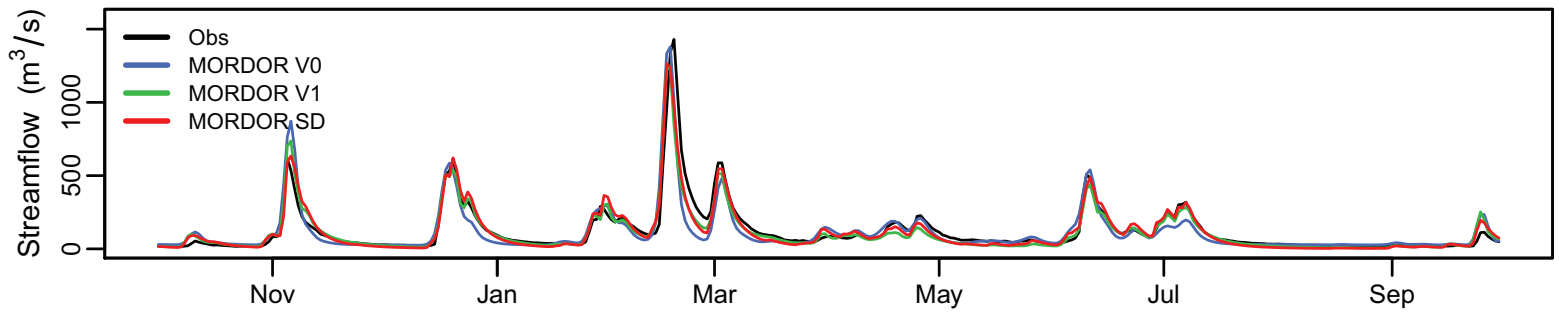

Year 1991

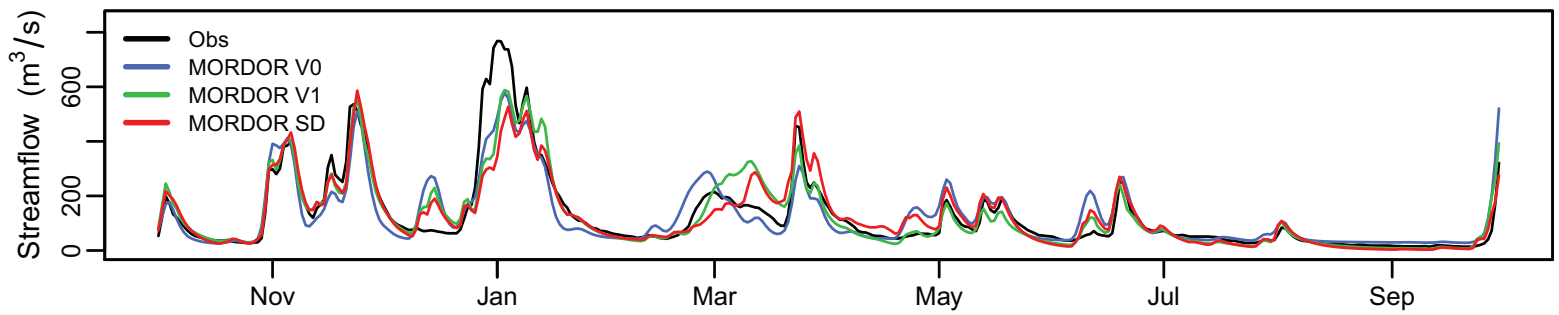

# Doubs@Neublans

Year 1992

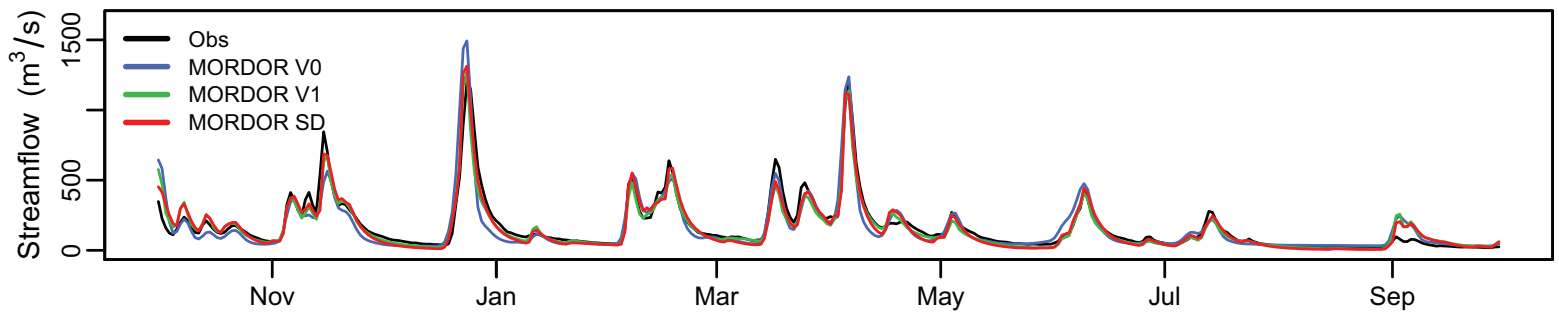

Year 1993

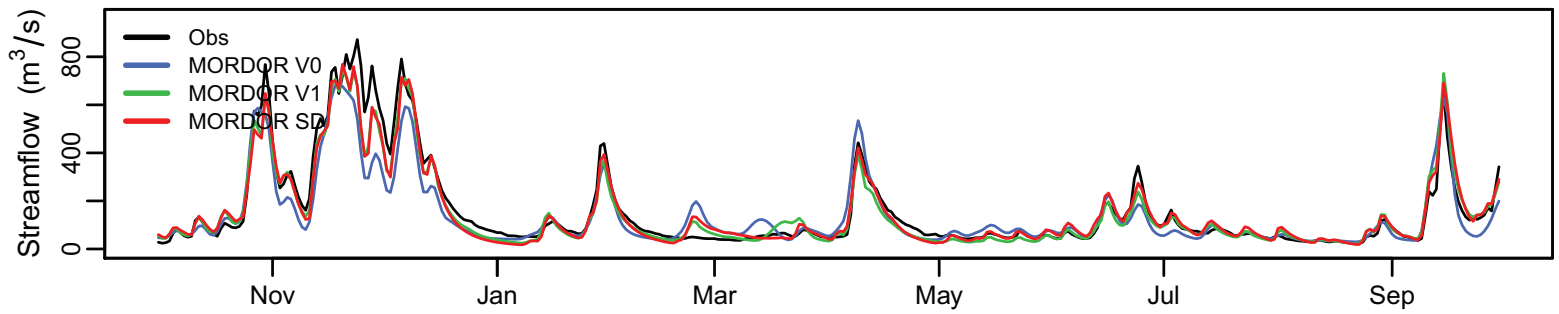

Year 1994

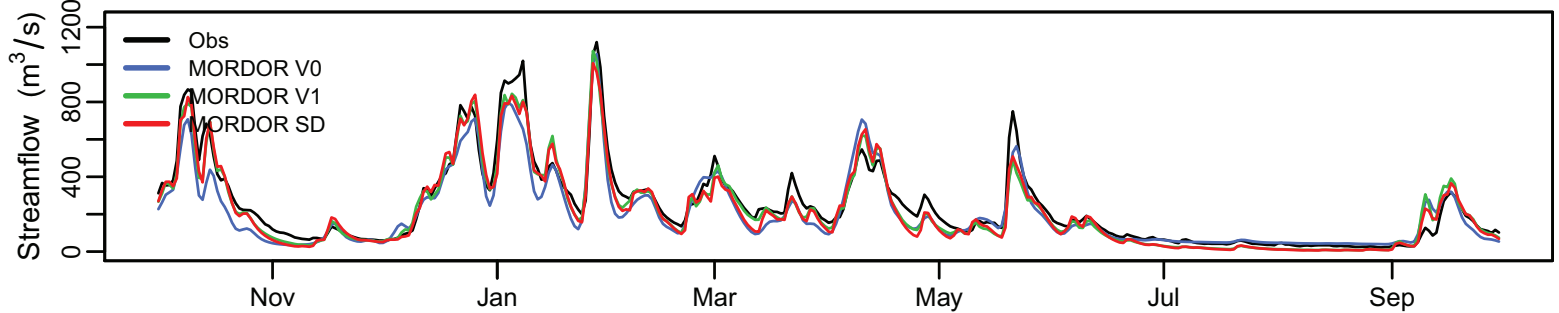

Year 1995

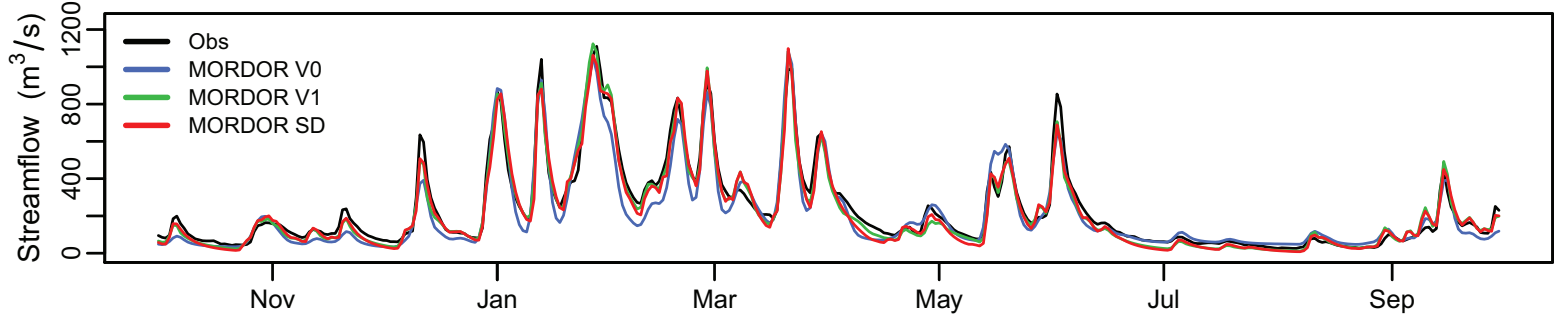

Year 1996

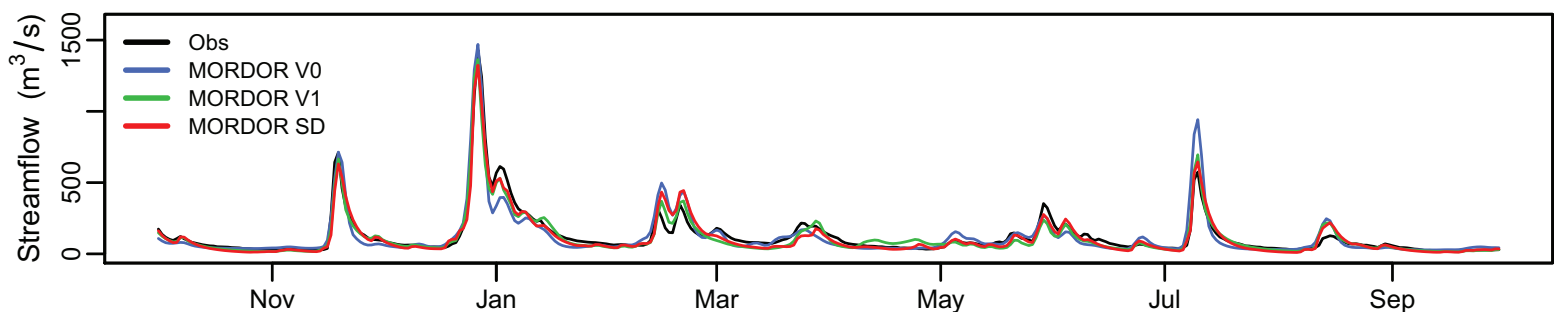

Year 1997

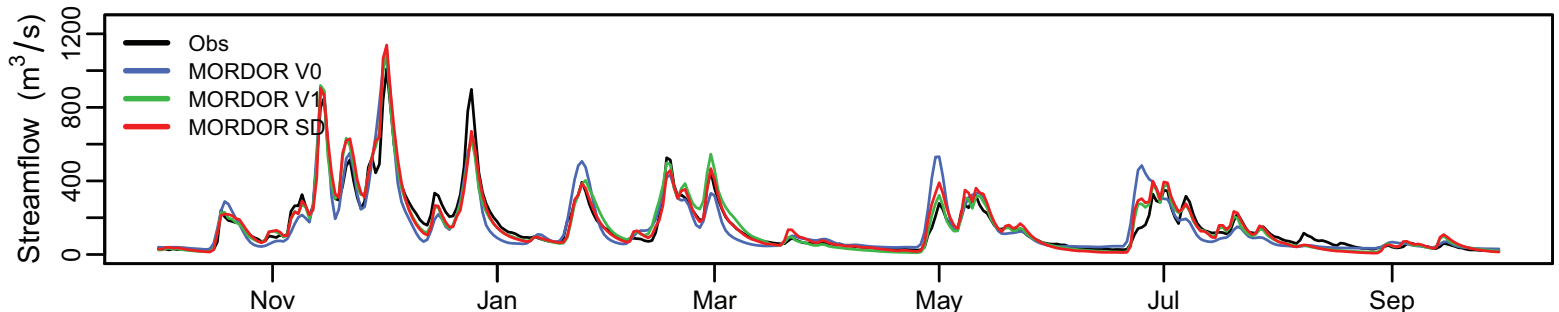

# Doubs@Neublans

Year 1998

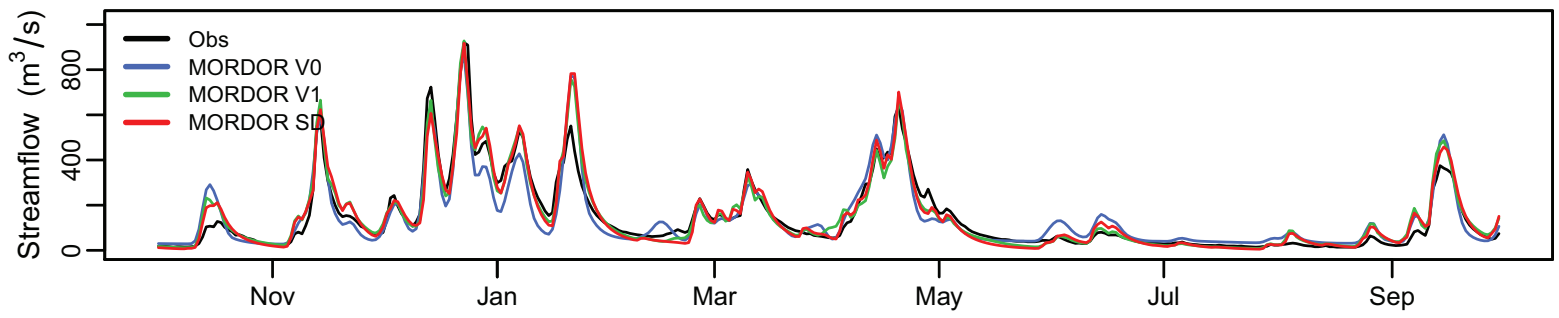

Year 1999

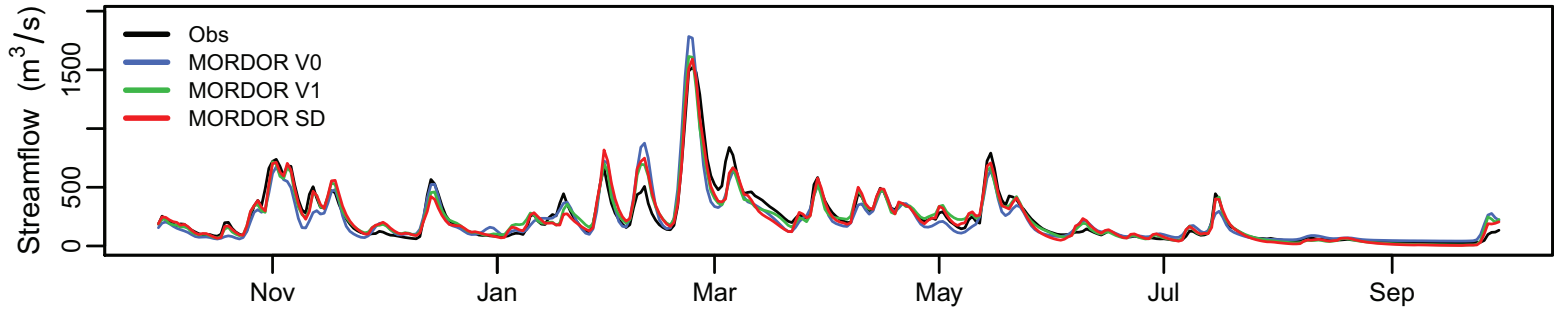

Year 2000

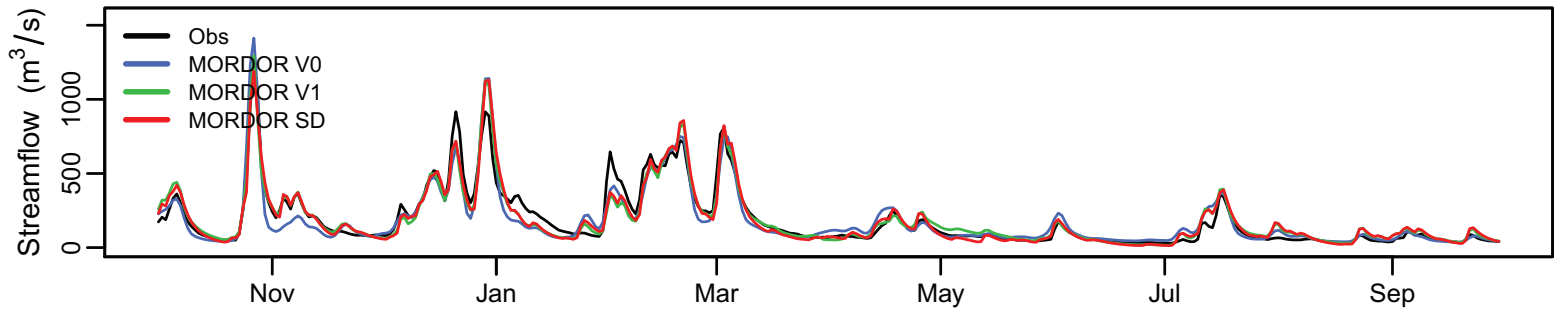

Year 2001

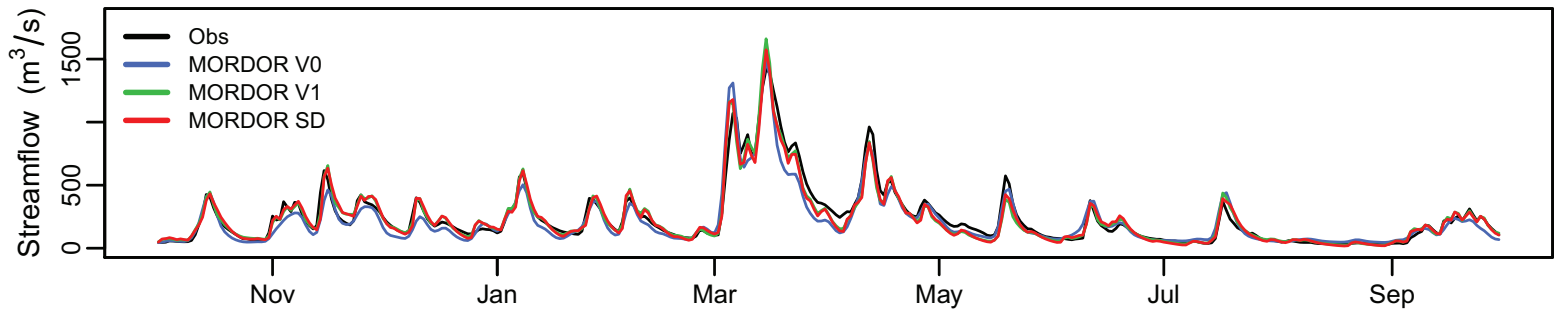

# Drac@Sautet

Year 1970

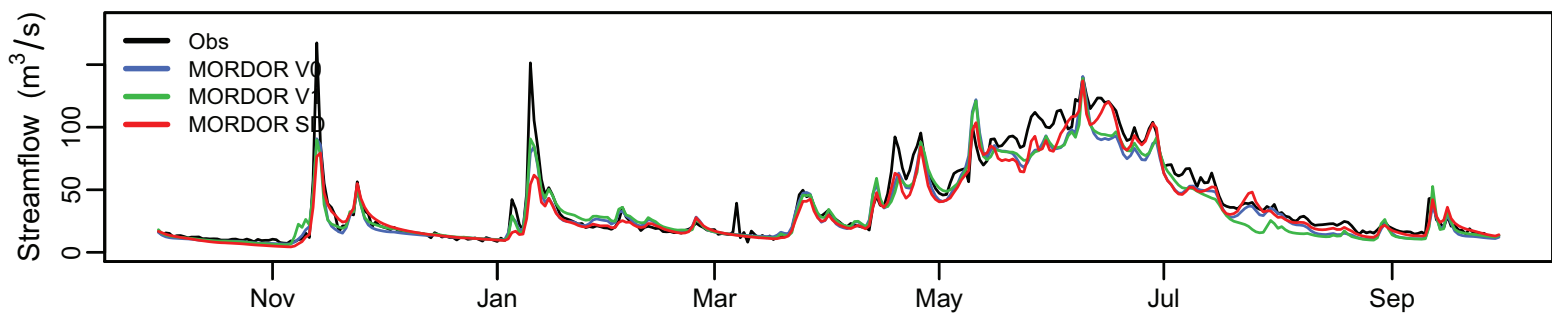

Year 1971

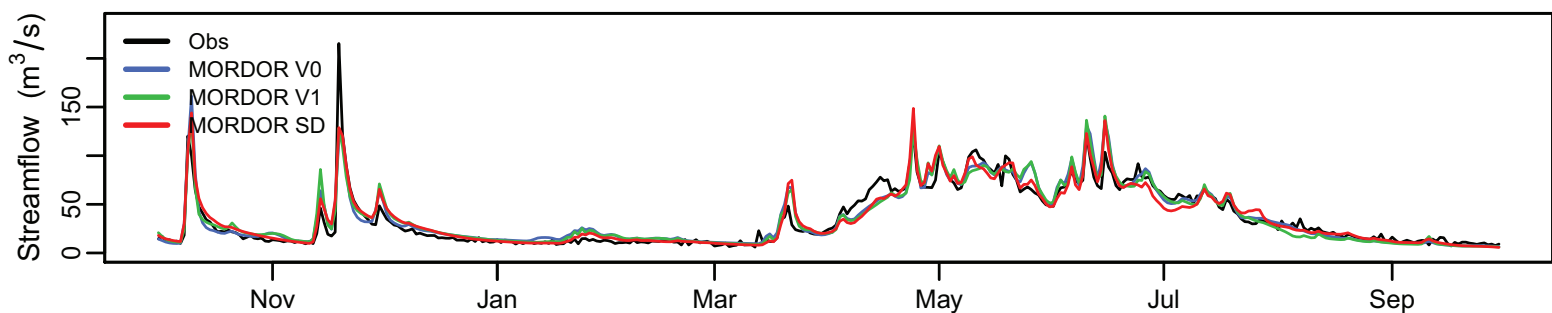

Year 1972

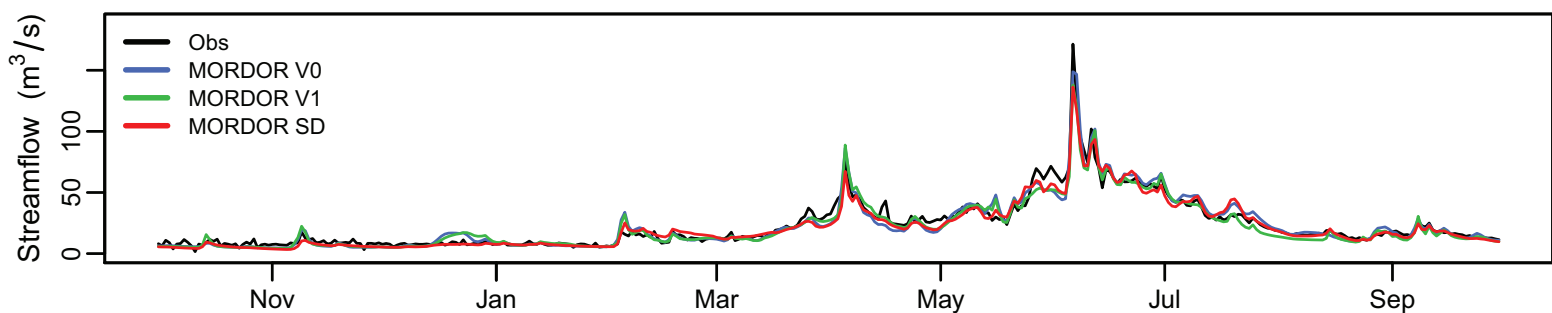

Year 1973

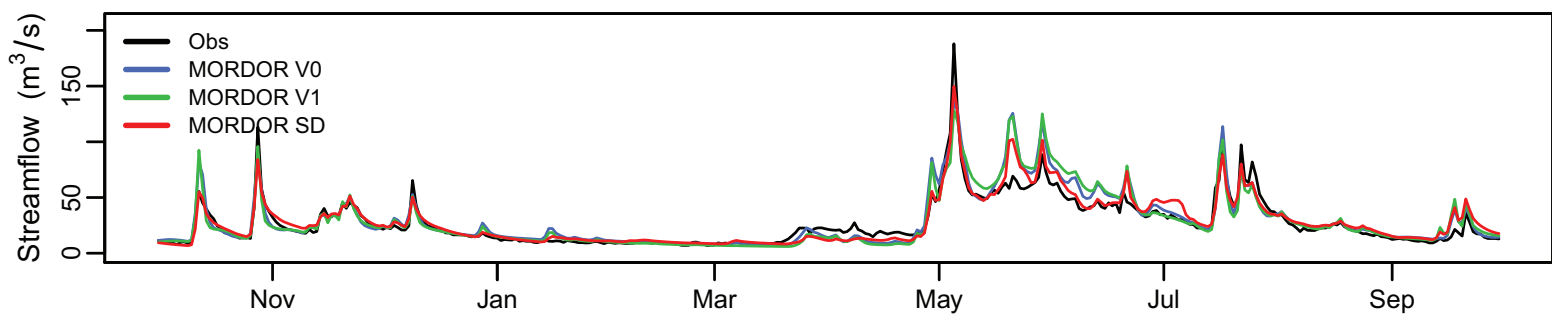

Year 1974

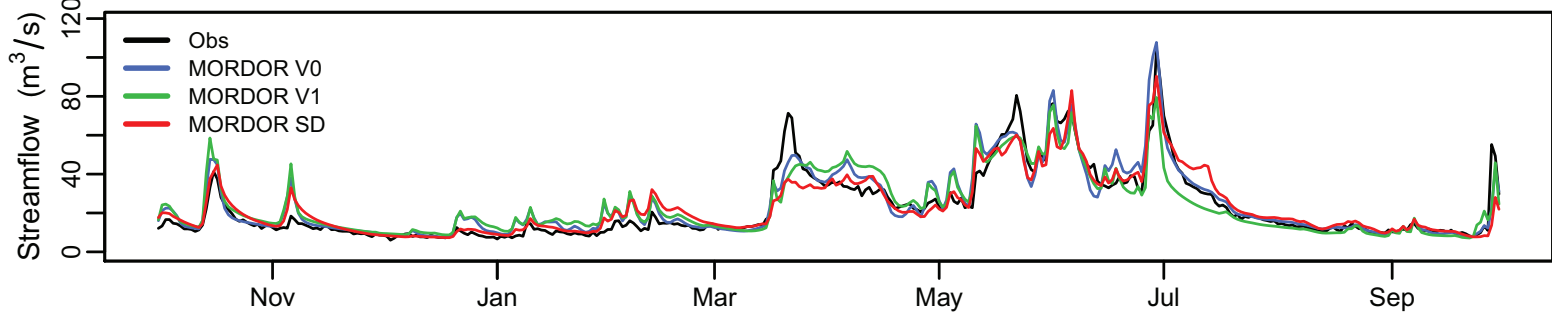

Year 1975

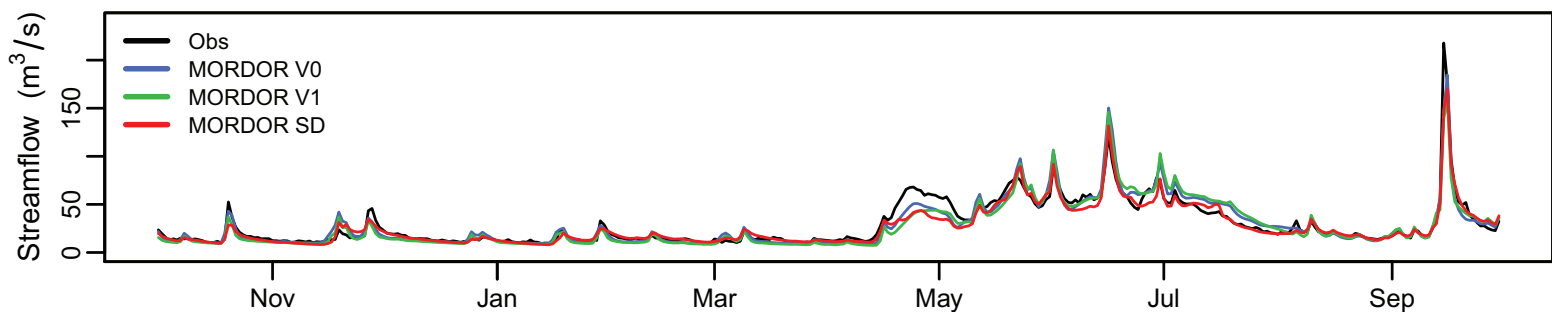



# Drac@Sautet

Year 1976

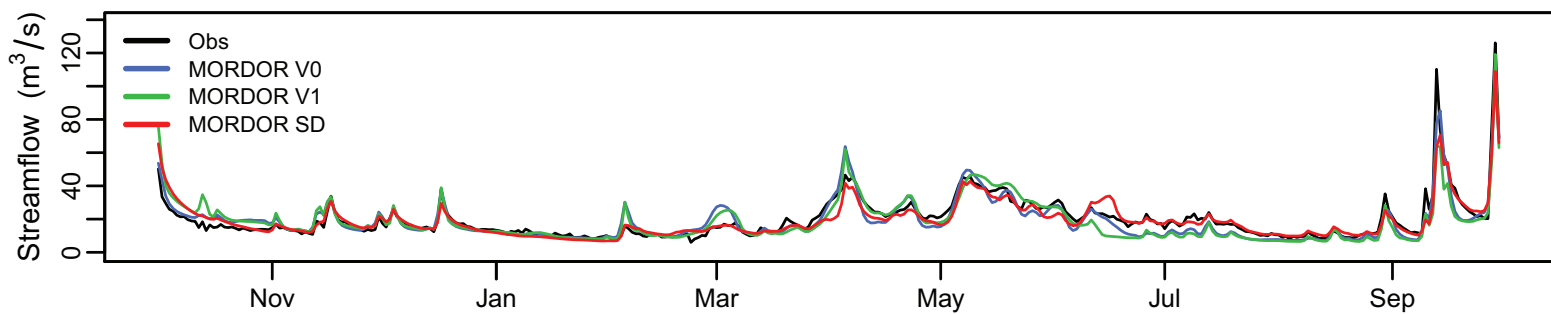

Year 1977

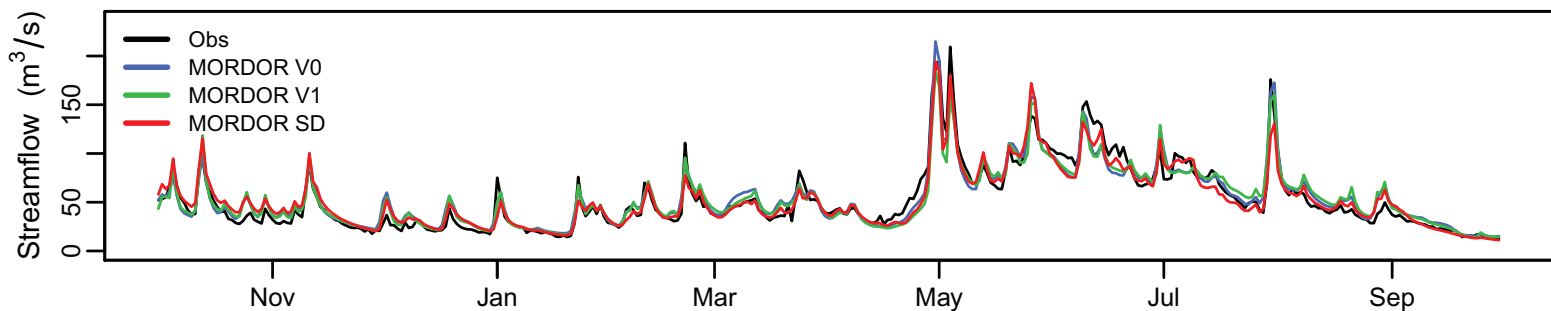

Year 1978

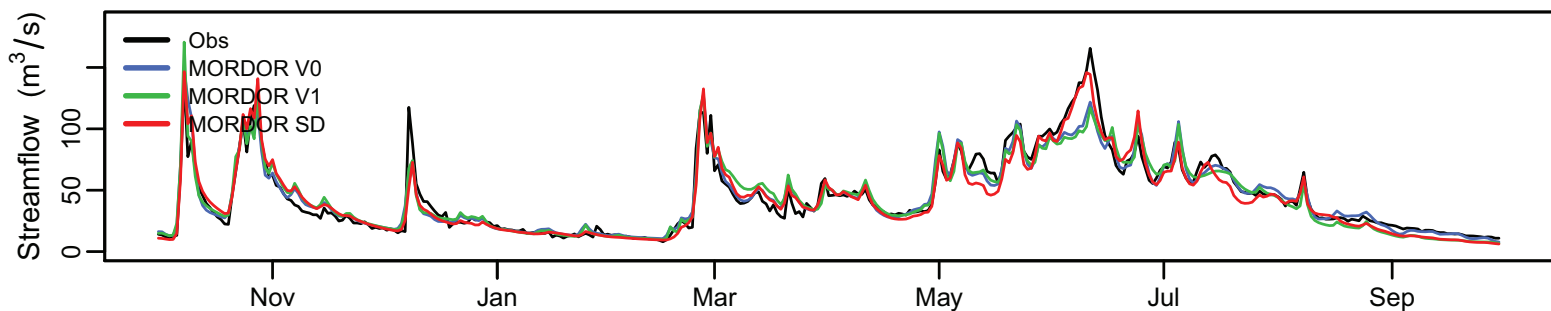

Year 1979

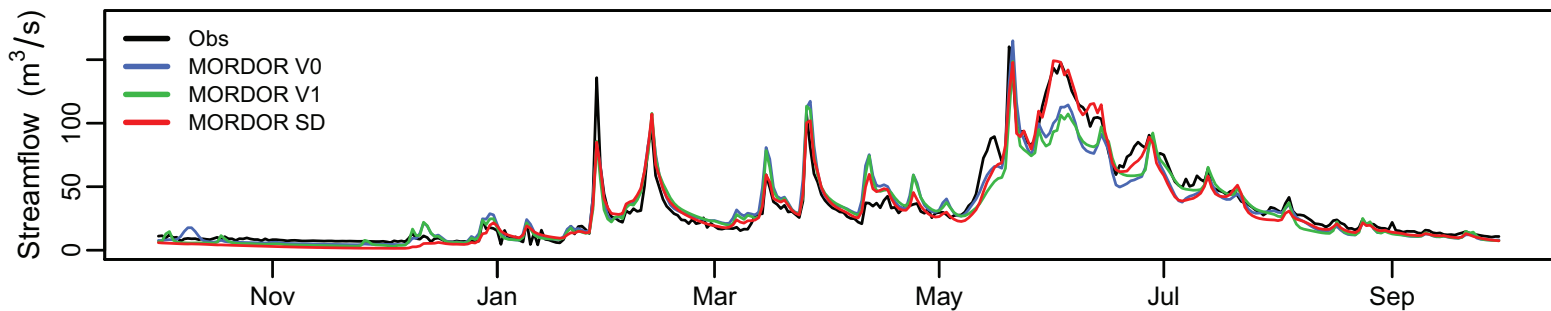

Year 1980

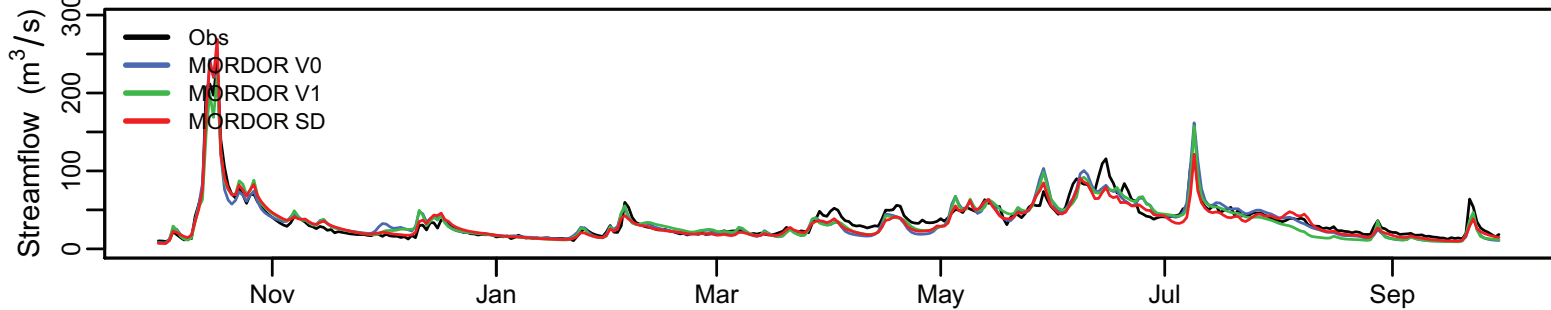

Year 1981

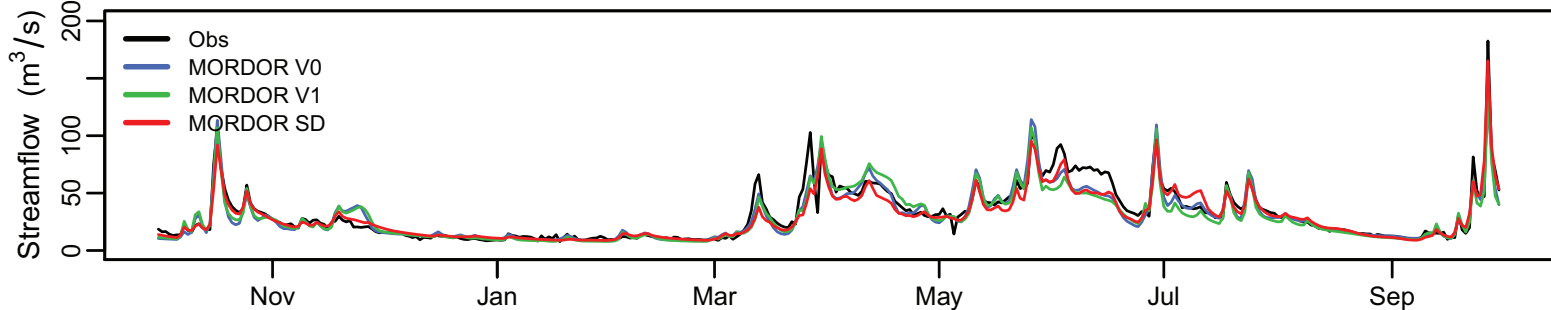

# Drac@Sautet

Year 1982

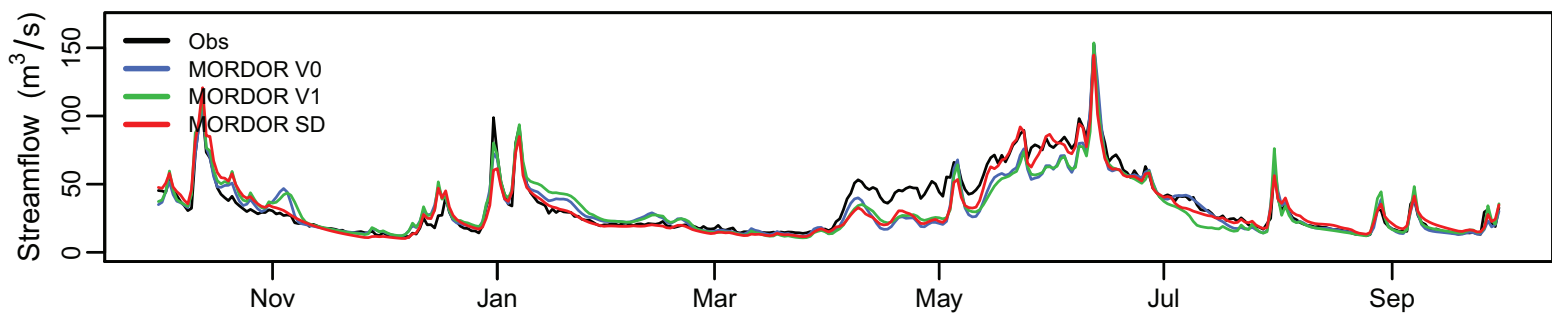

Year 1983

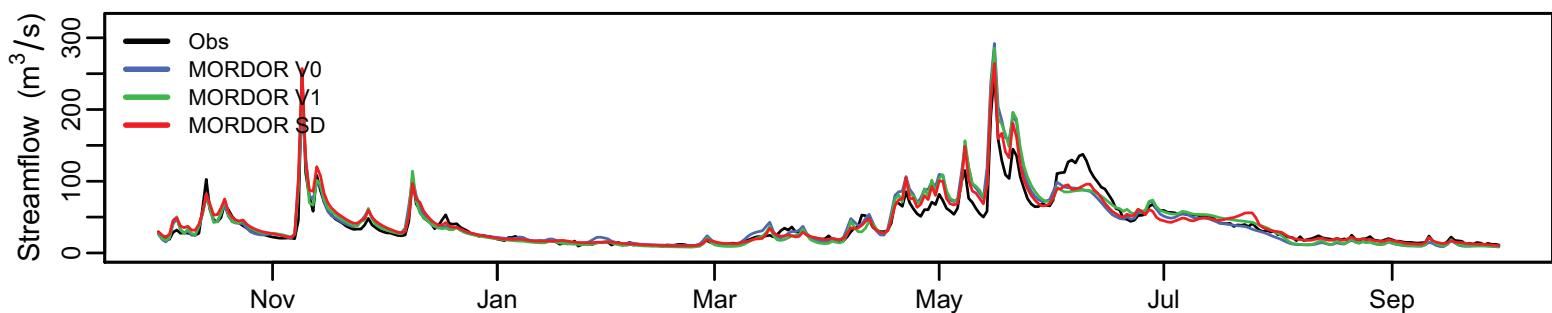

Year 1984

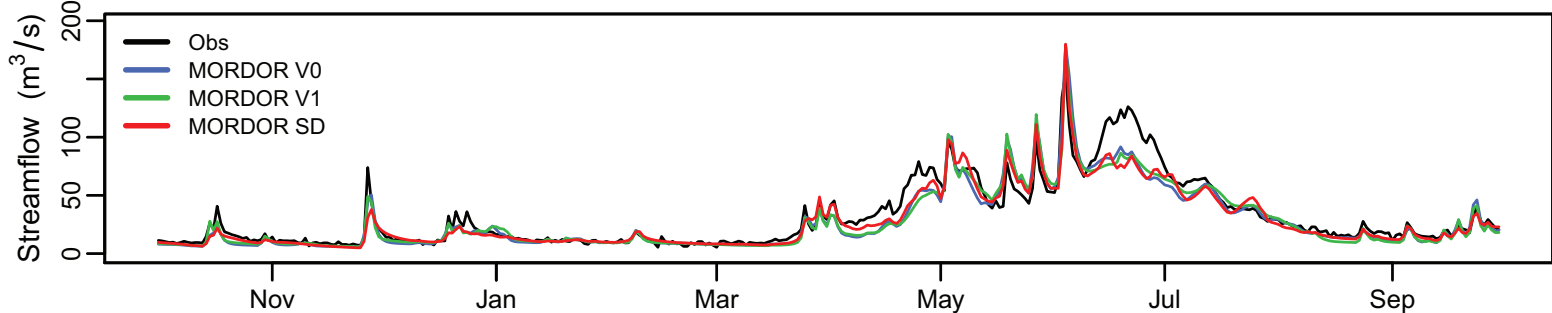

Year 1985

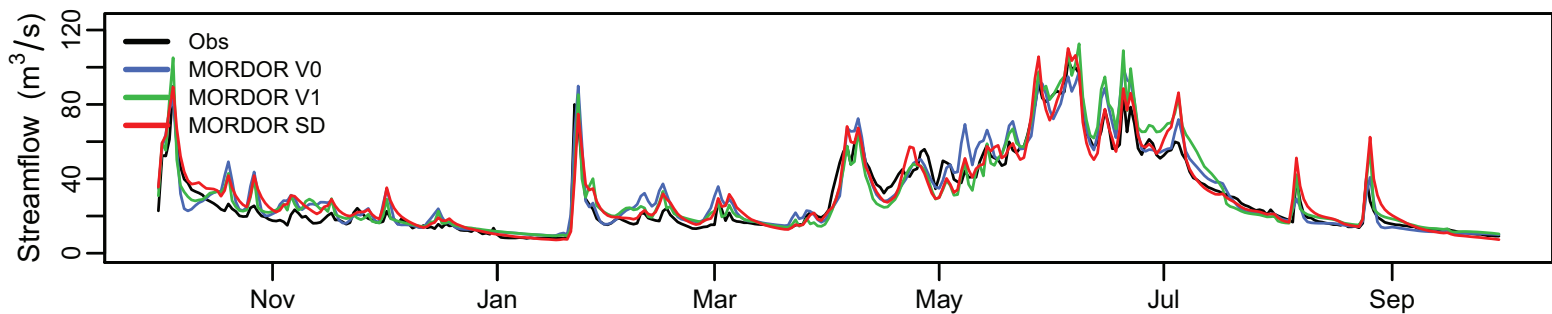

Year 1986

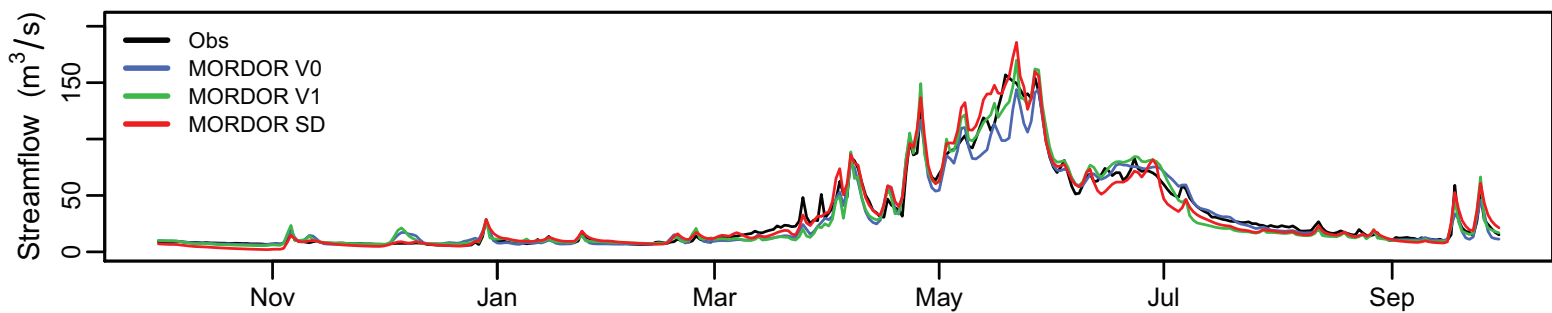

Year 1987

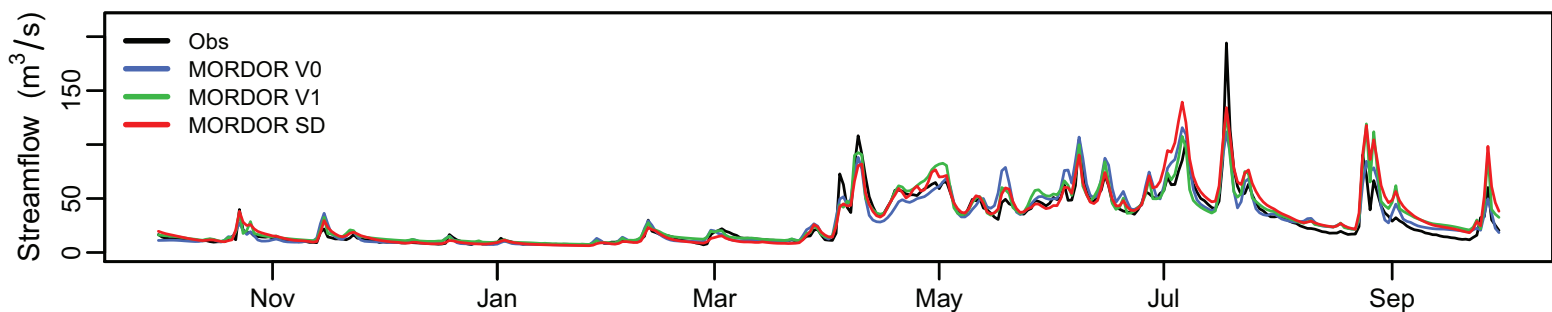

# Drac@Sautet

Year 1988

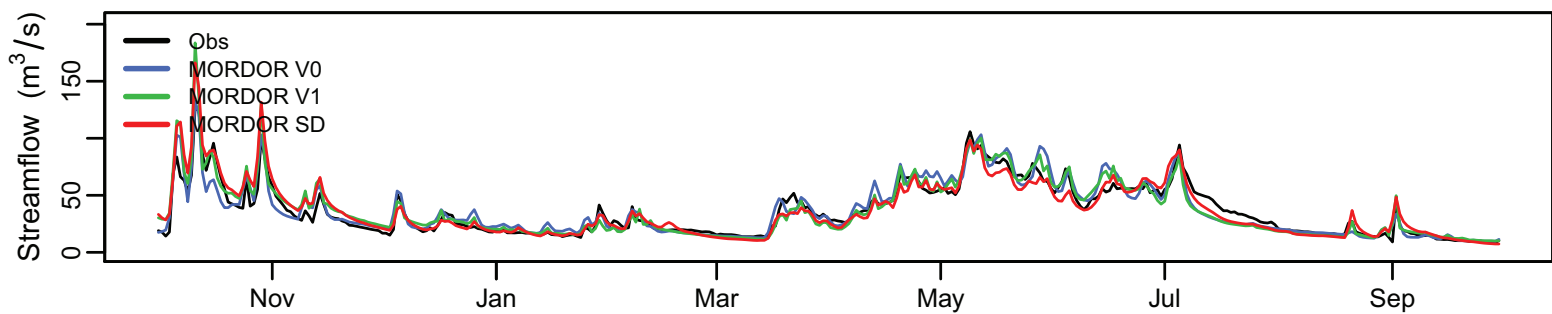

Year 1989

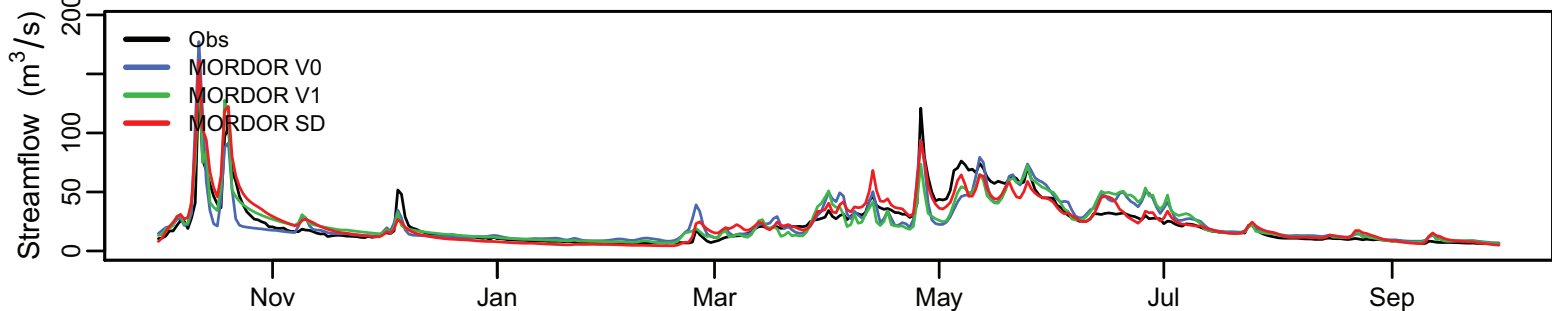

Year 1990

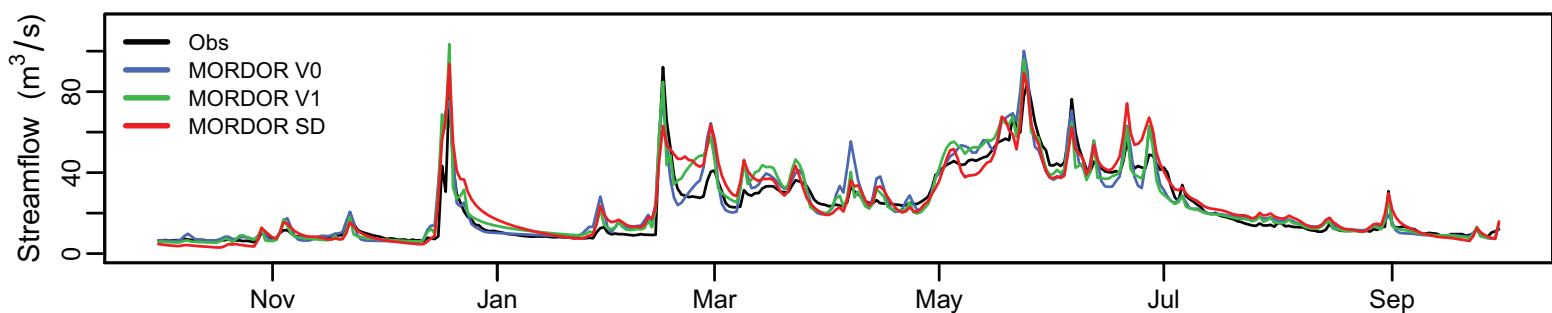

Year 1991

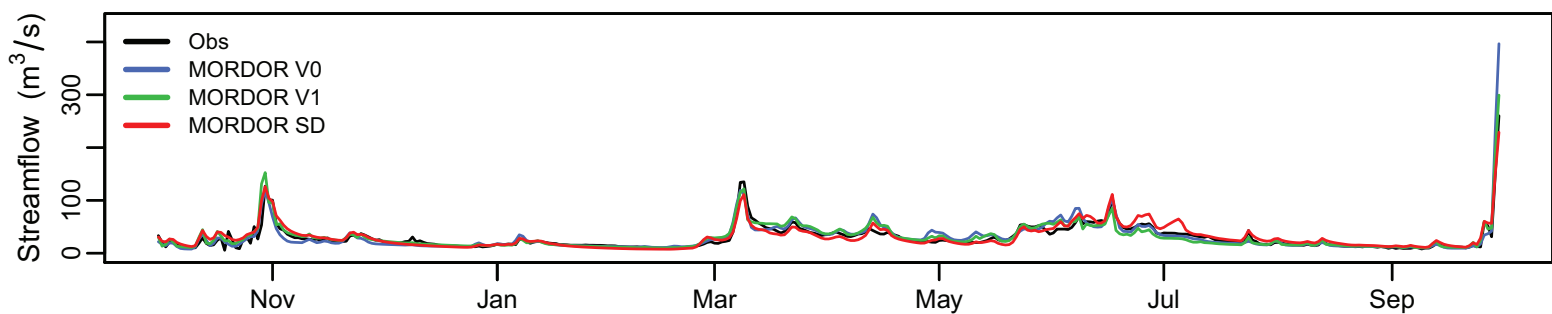

Year 1992

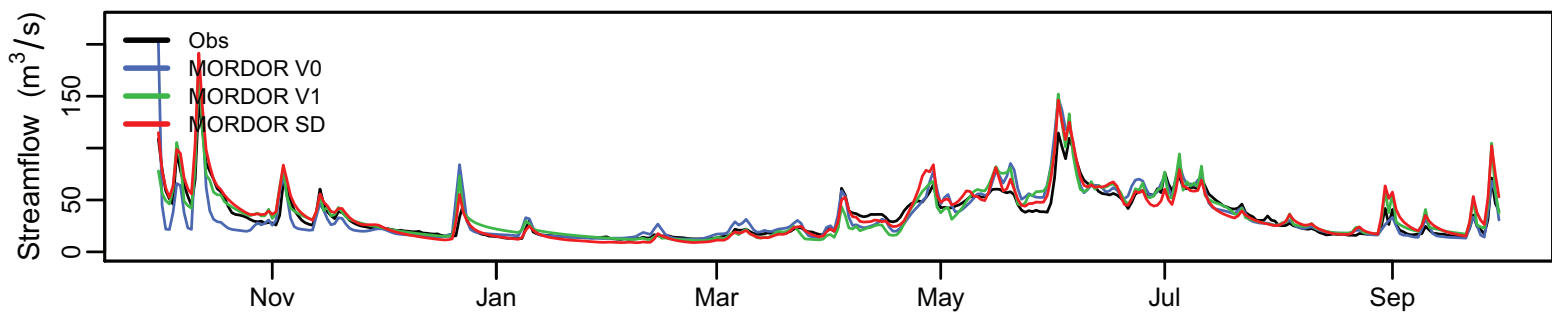

Year 1993

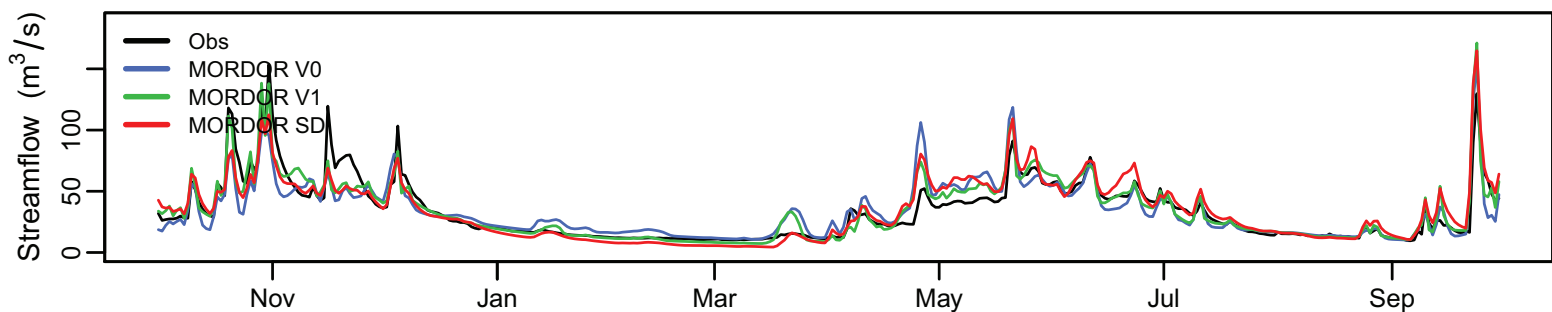

# Drac@Sautet

Year 1994

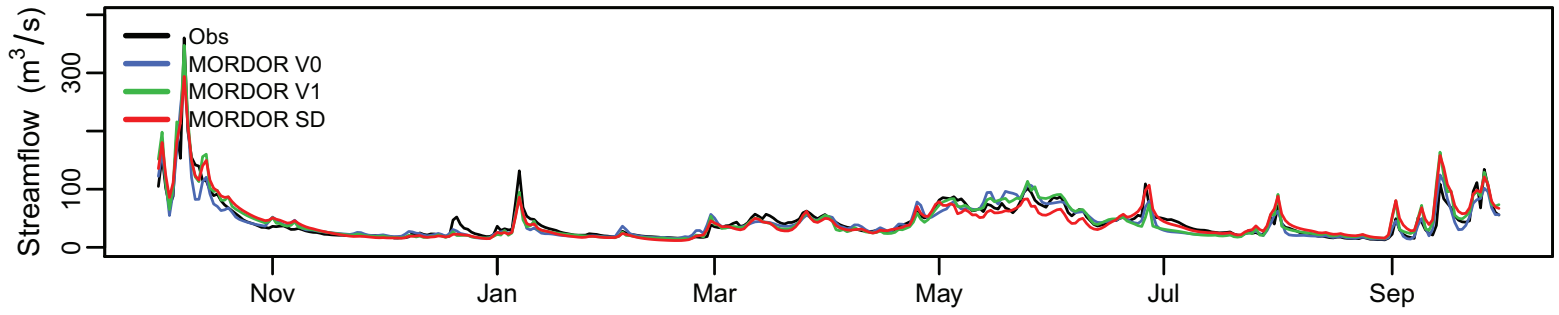

Year 1995

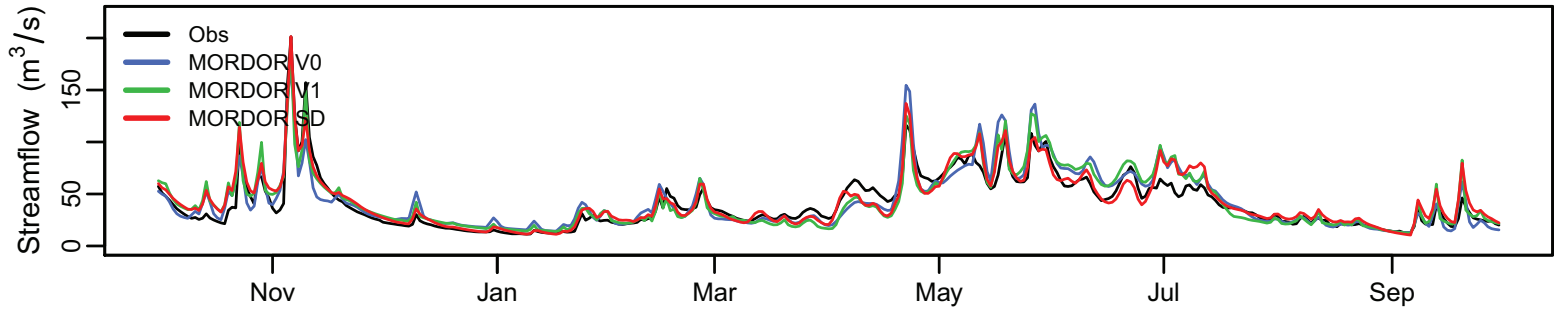

Year 1996

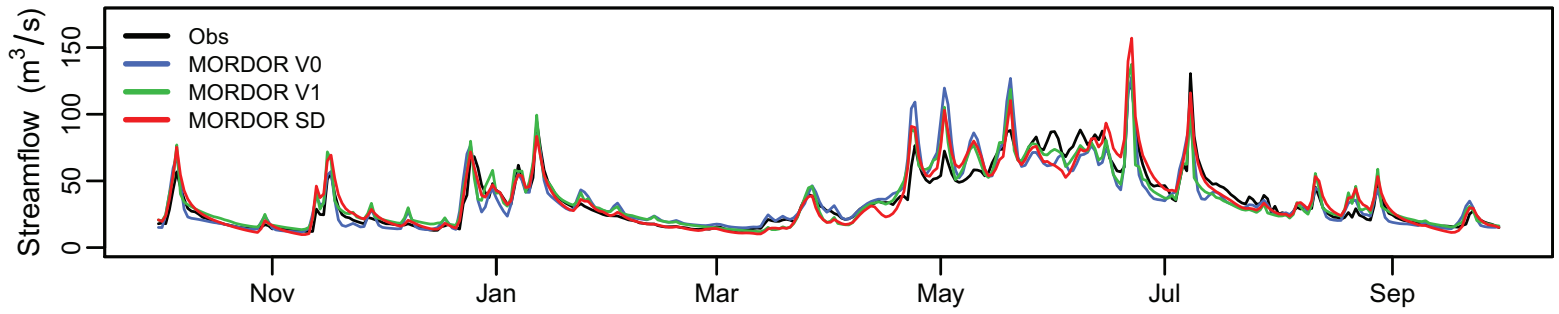

Year 1997

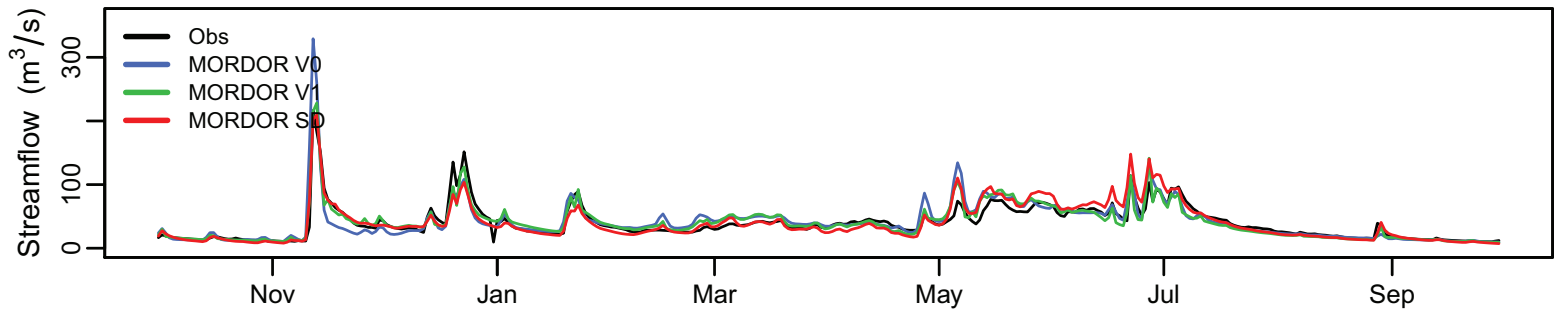

Year 1998

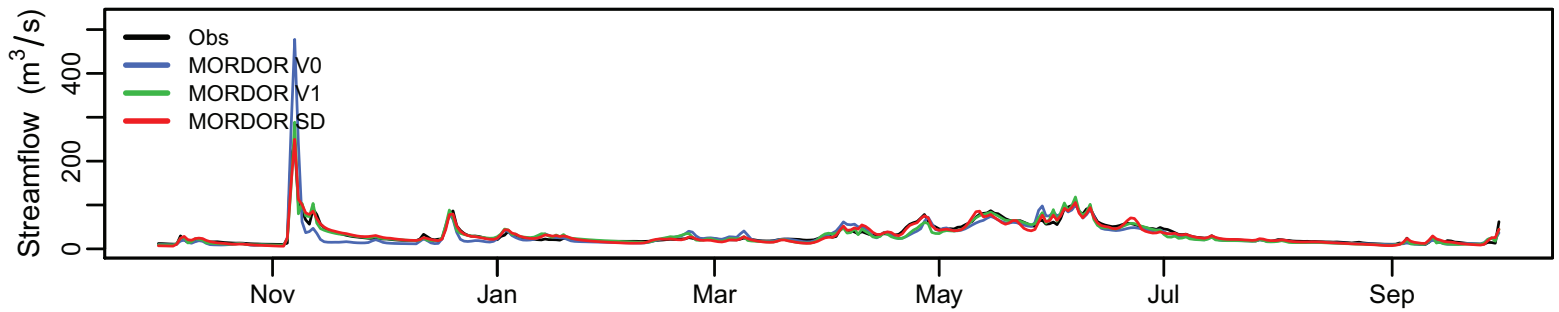

Year 1999

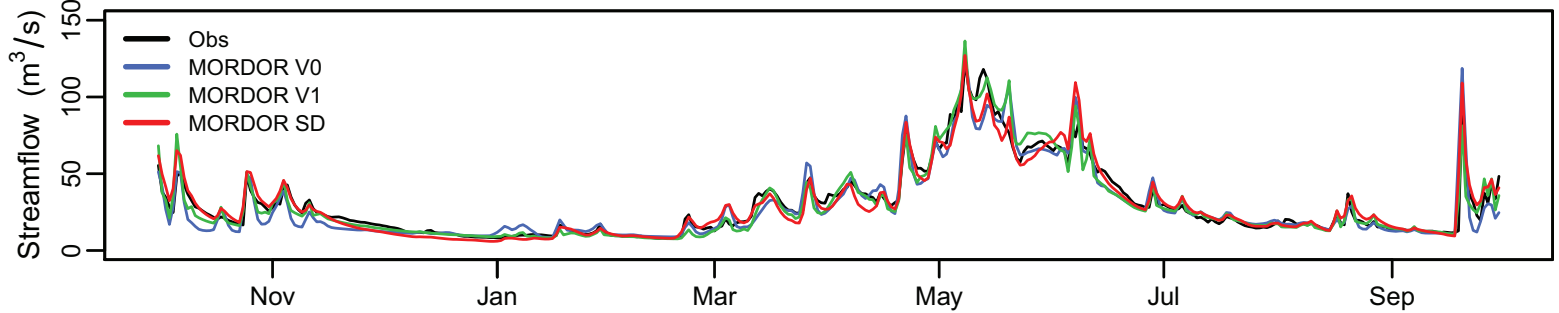

# Durance@Clapiere

Year 1983

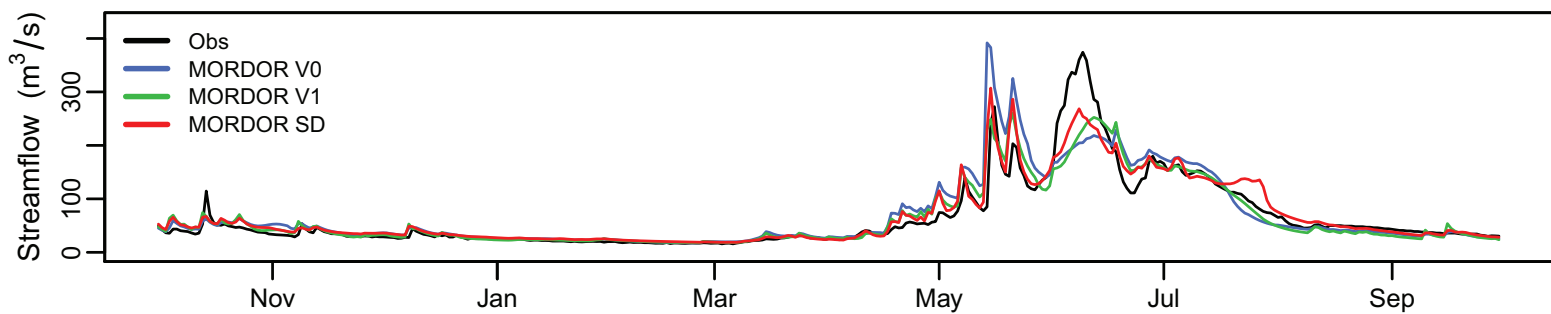

Year 1984

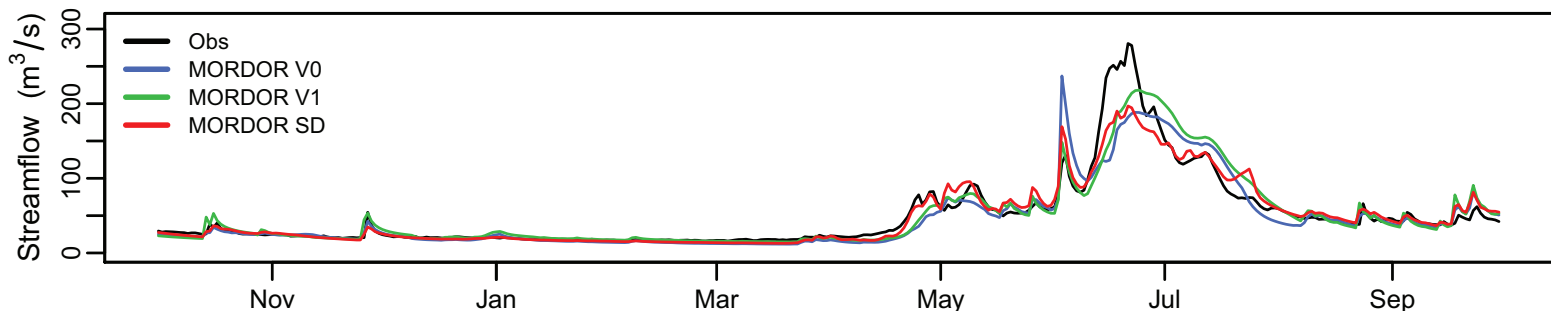

Year 1985

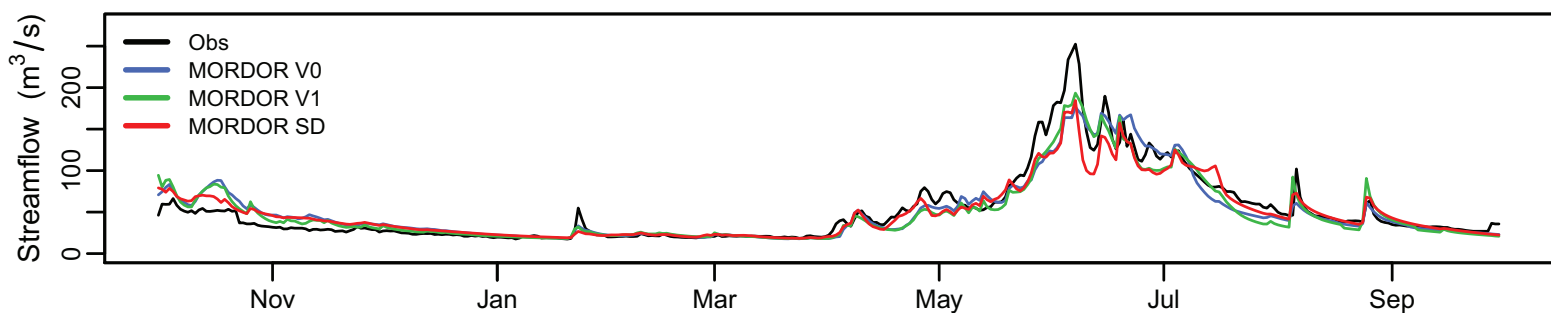

Year 1986

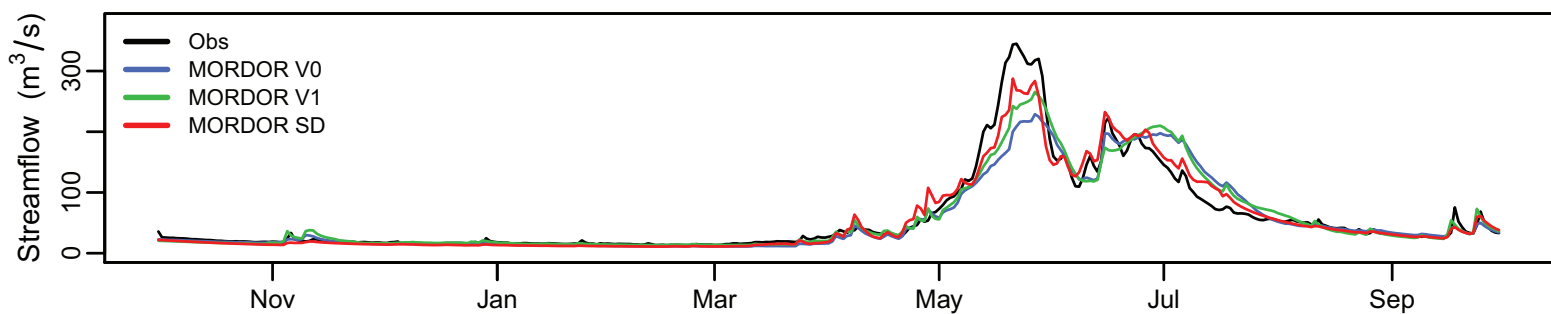

Year 1987

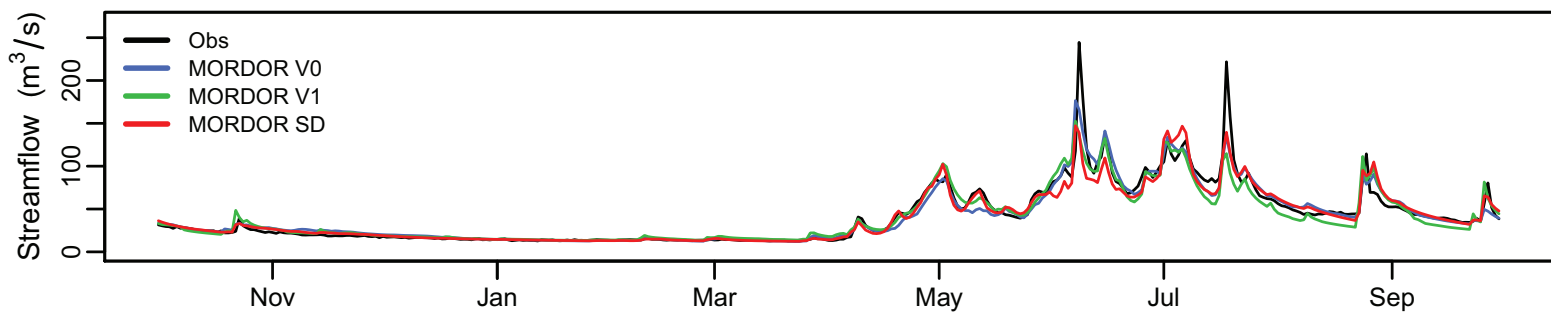

Year 1988

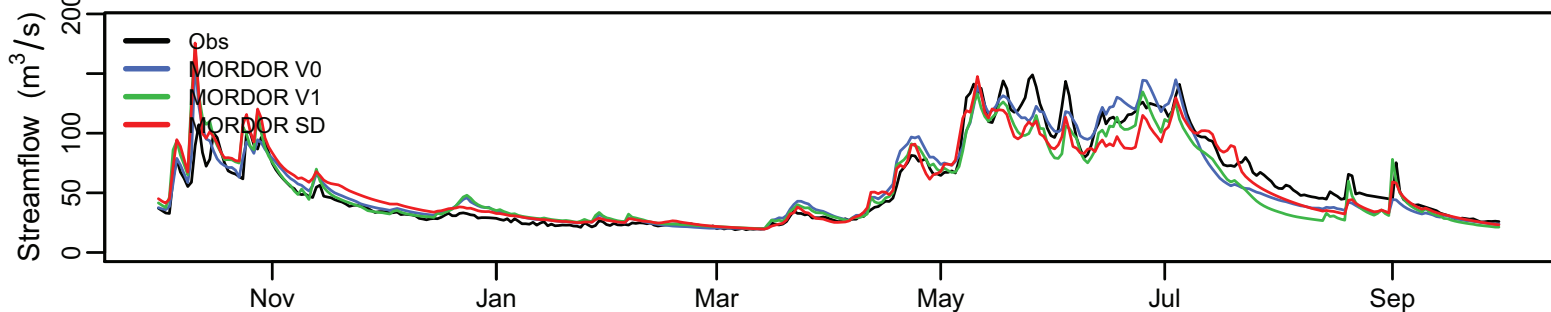

# Durance@Clapiere

Year 1989

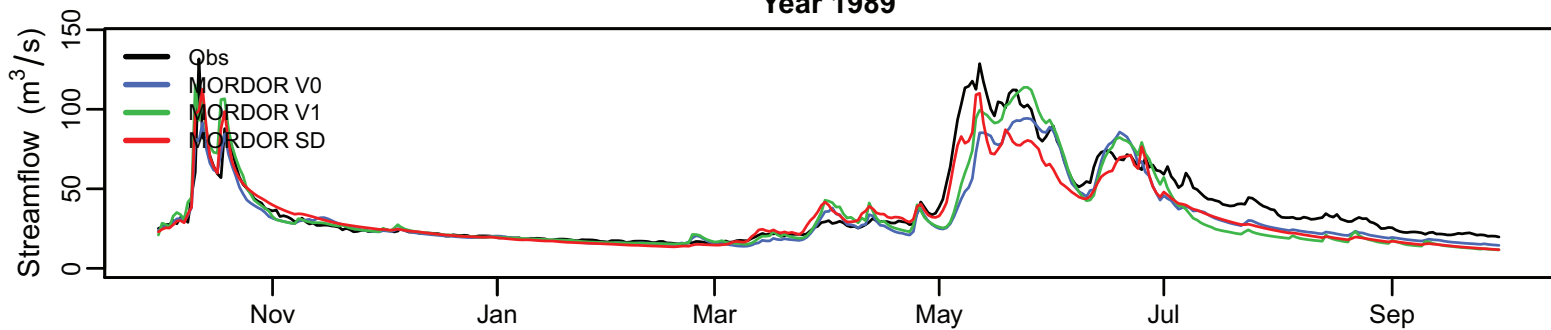

Year 1990

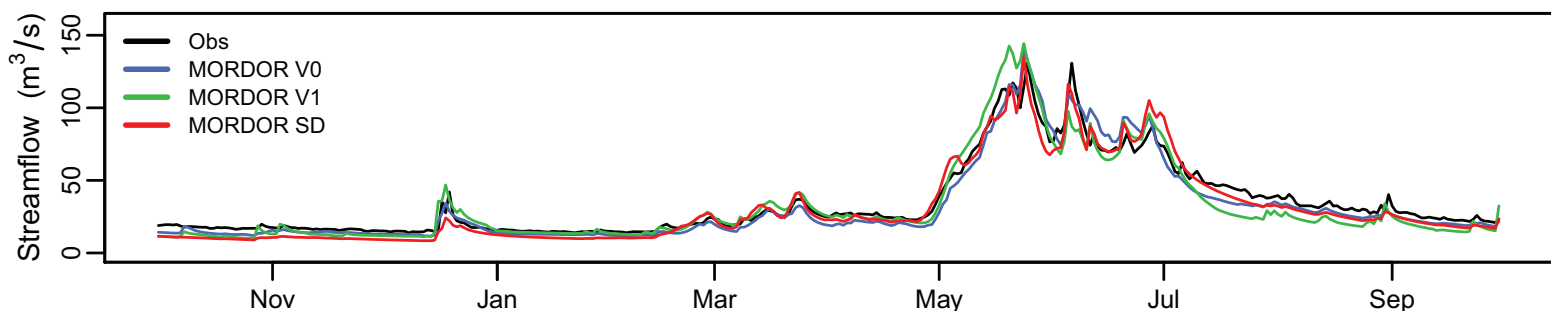

Year 1991

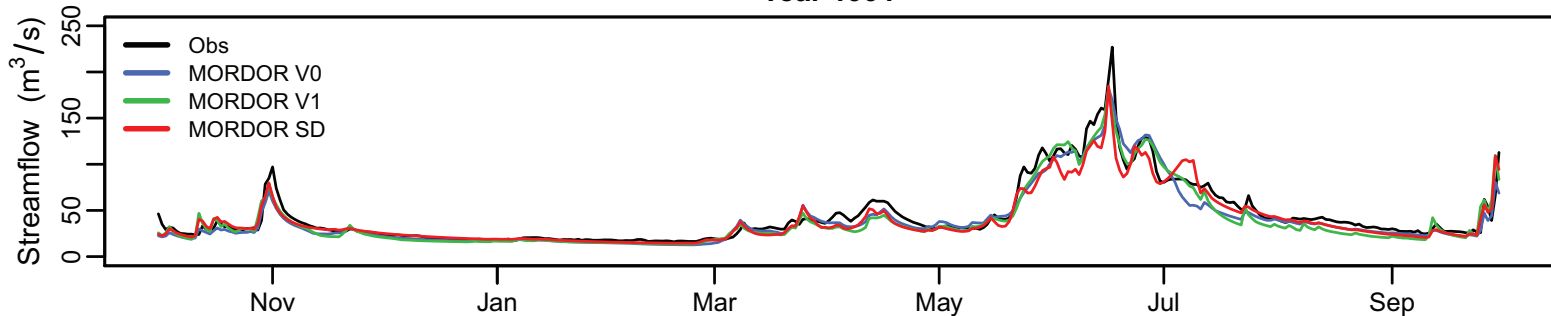

Year 1992

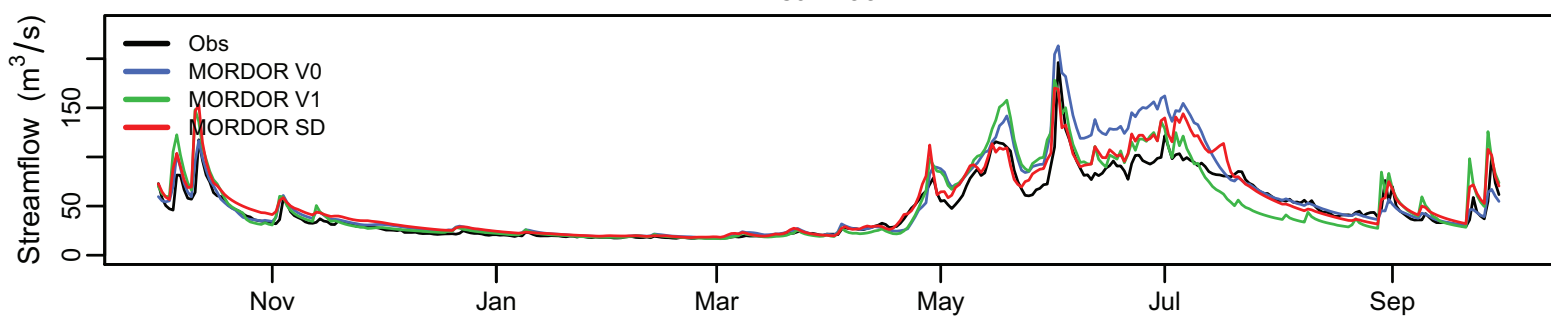

Year 1993

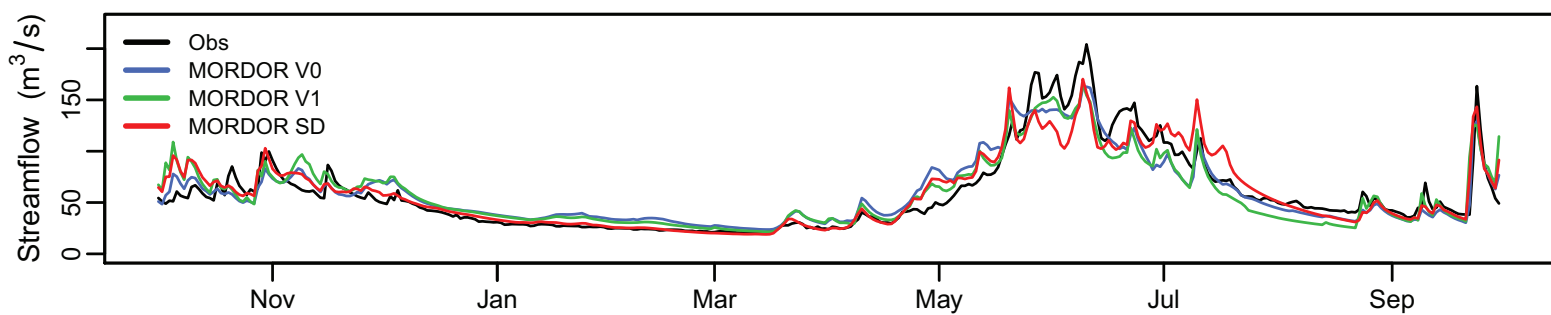

Year 1994

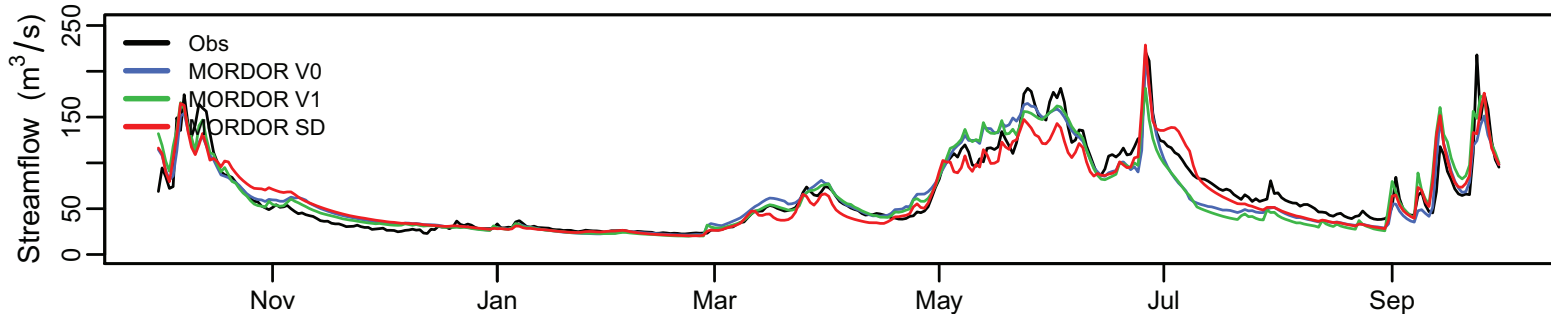

# Durance@Clapiere

Year 1995

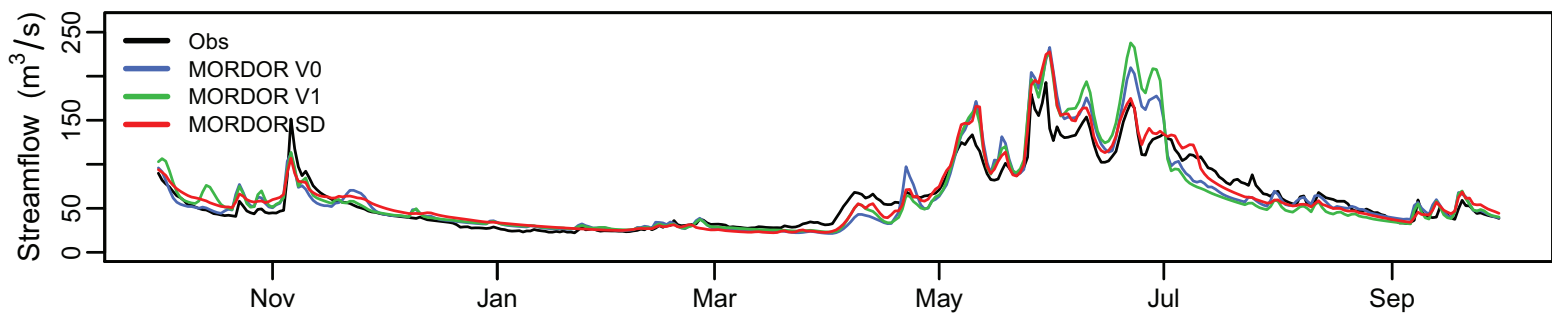

Year 1996

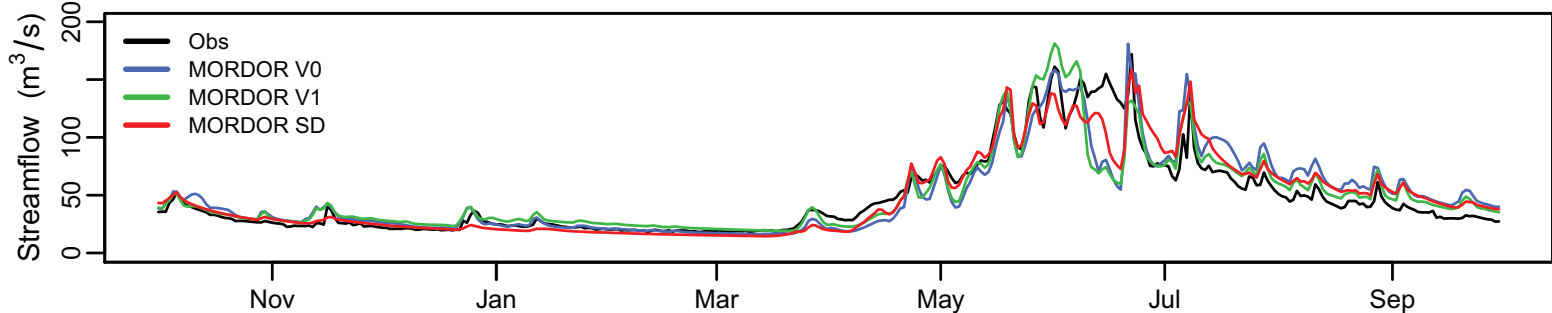

Year 1997

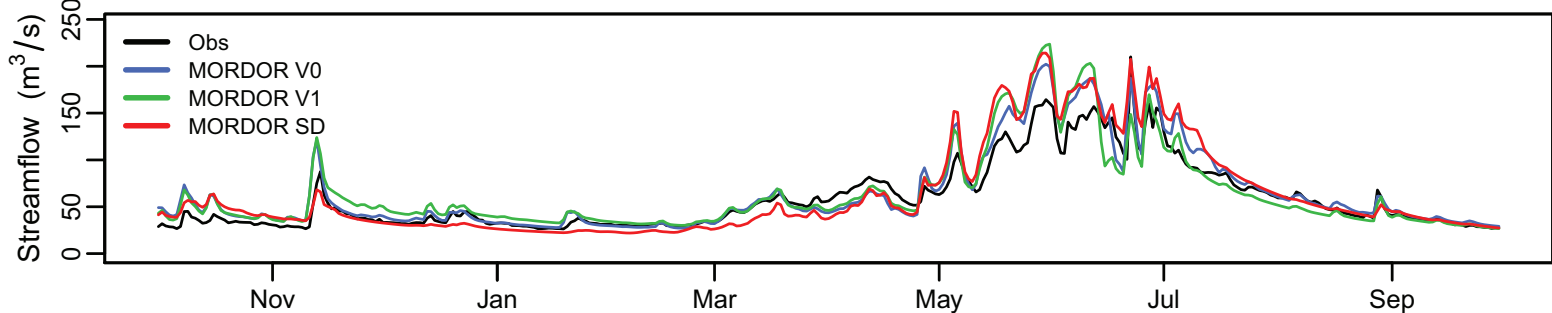

Year 1998

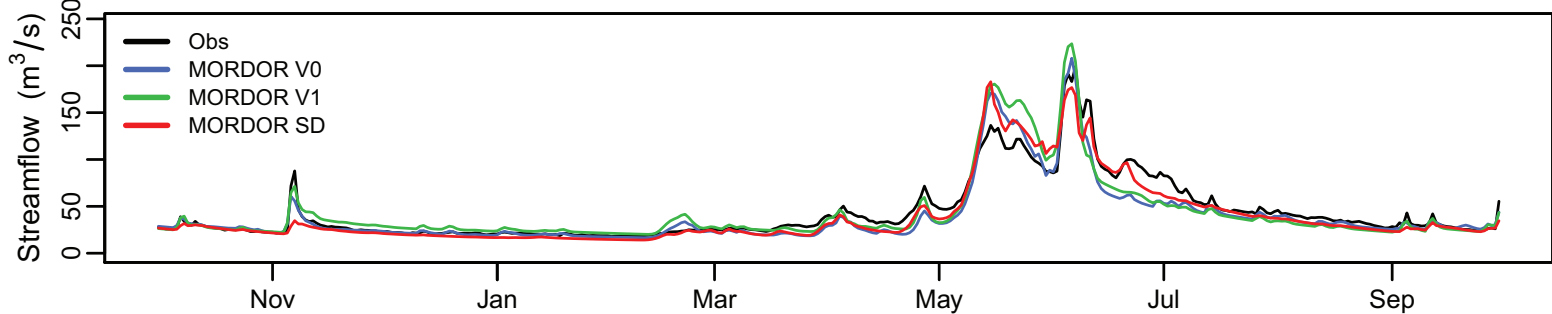

Year 1999

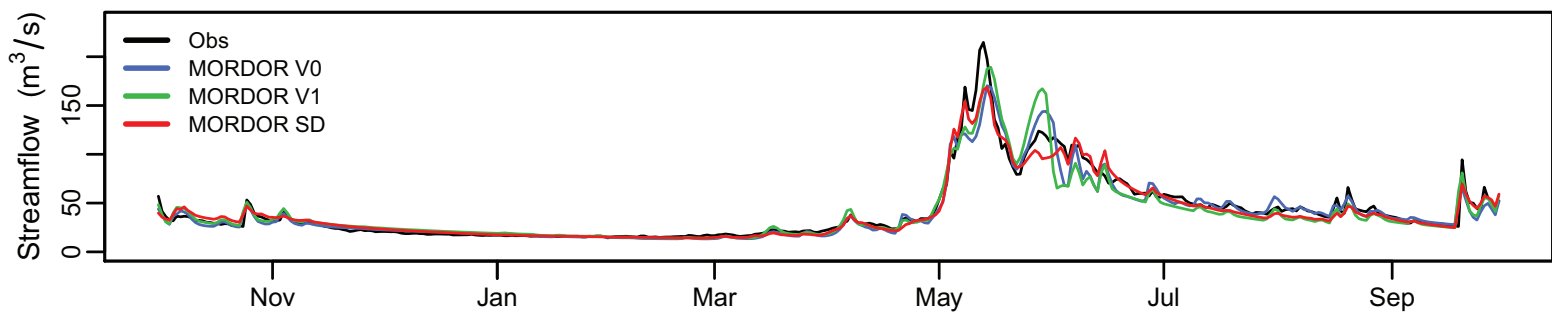

Year 2000

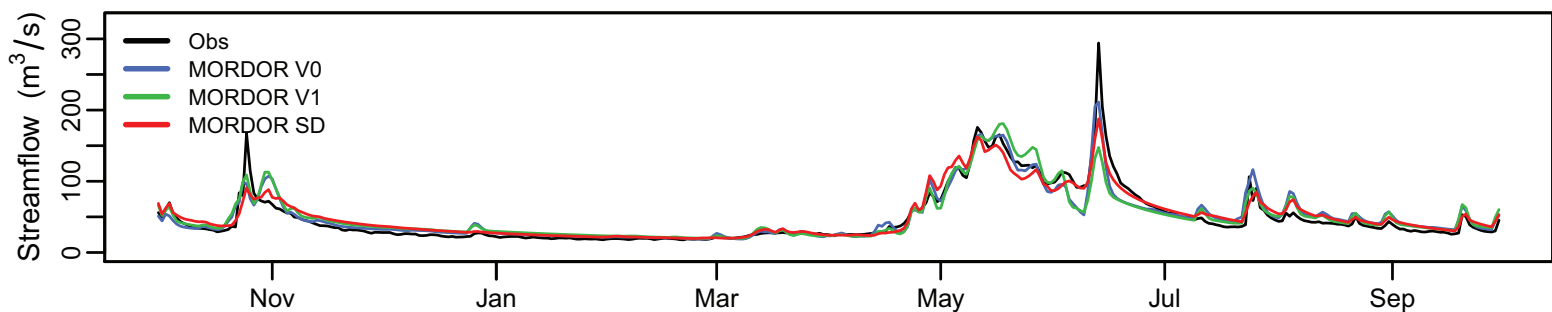

# Durance@Clapiere

Year 2001

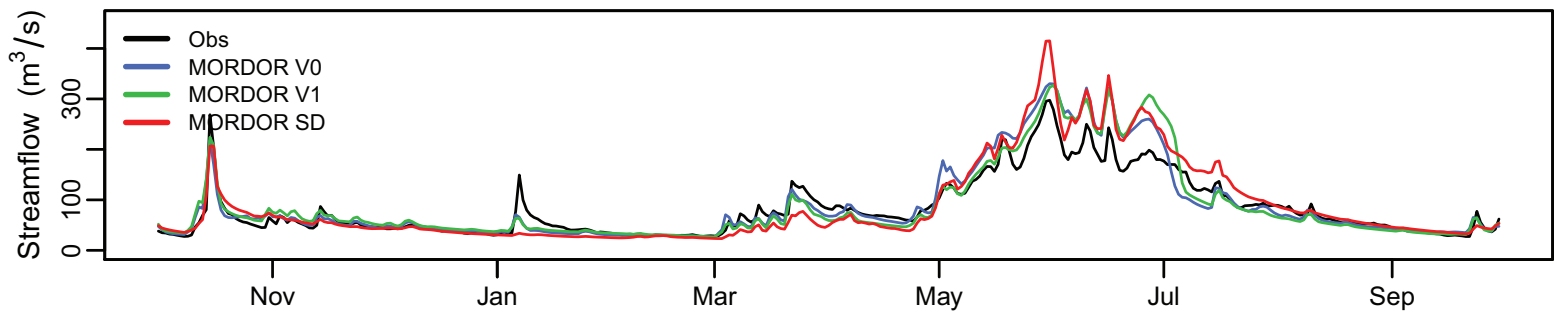

Year 2002

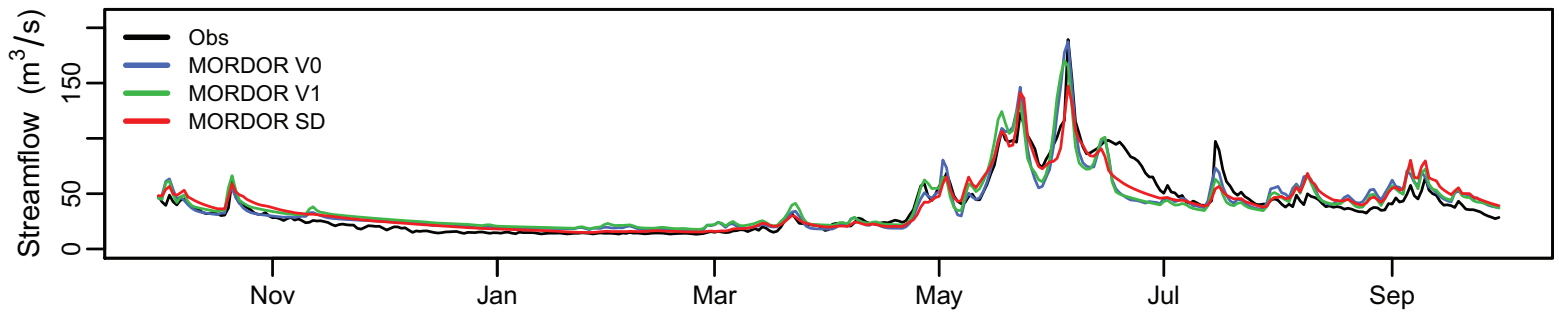

Year 2003

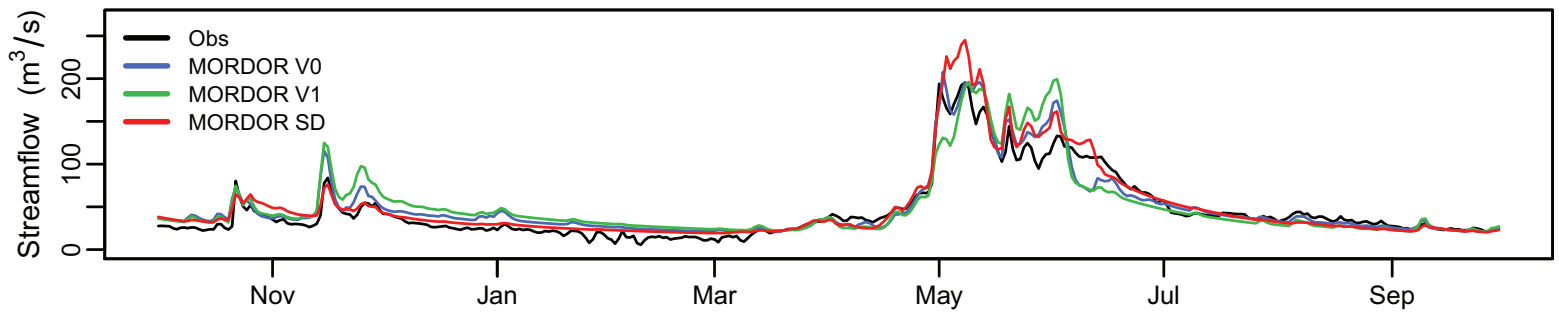

Year 2004

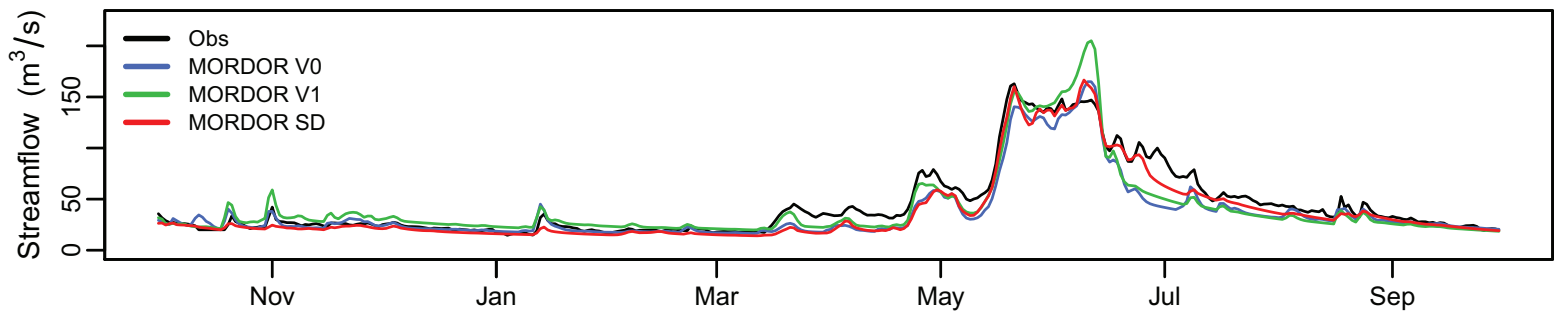

Year 2005

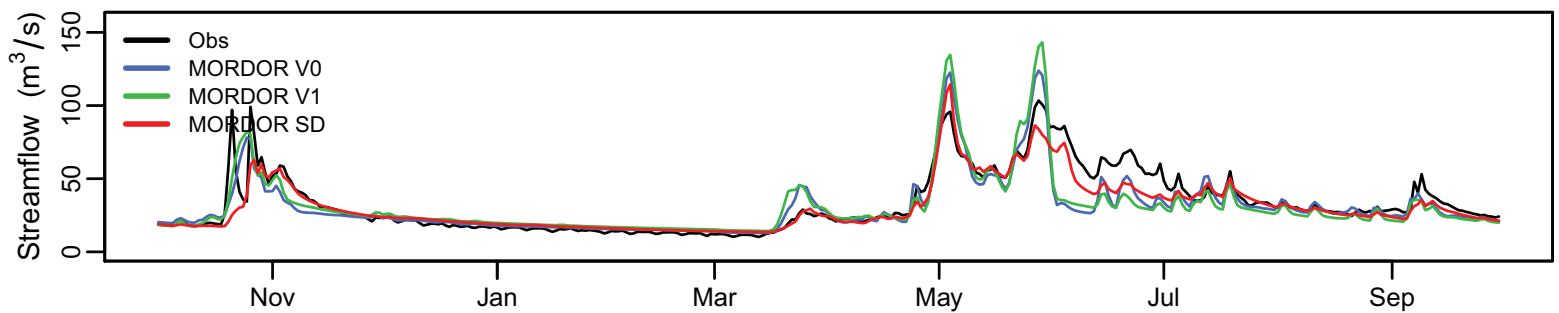



# Eyrieux@Pontpierre

Year 1999

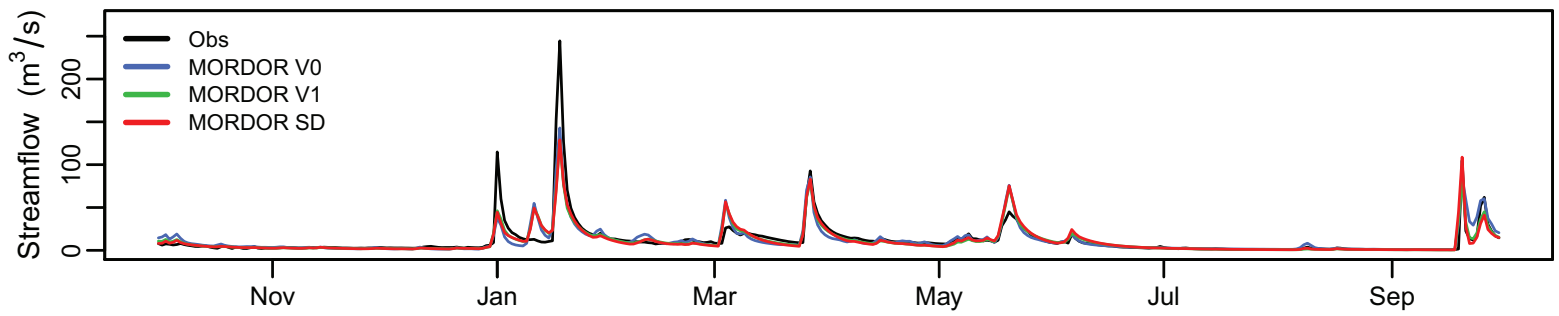

Year 2000

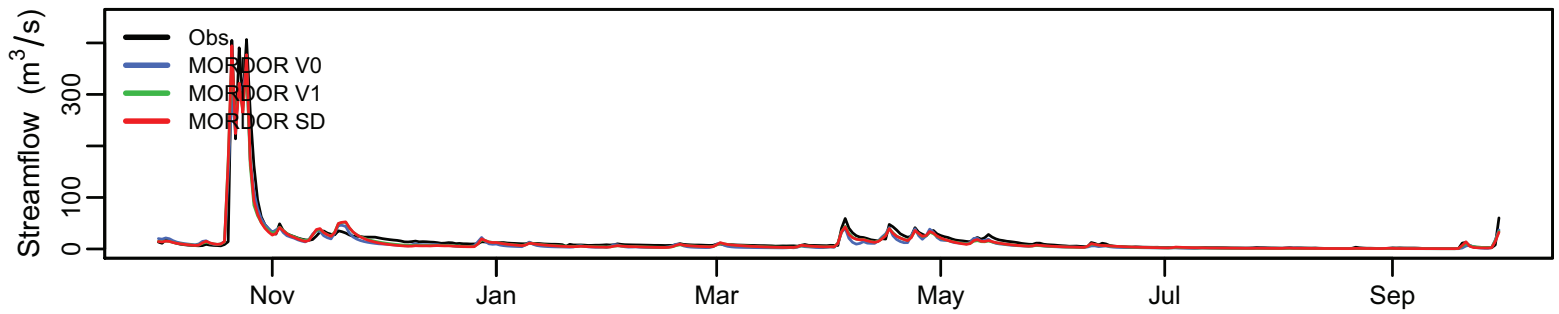

Year 2001

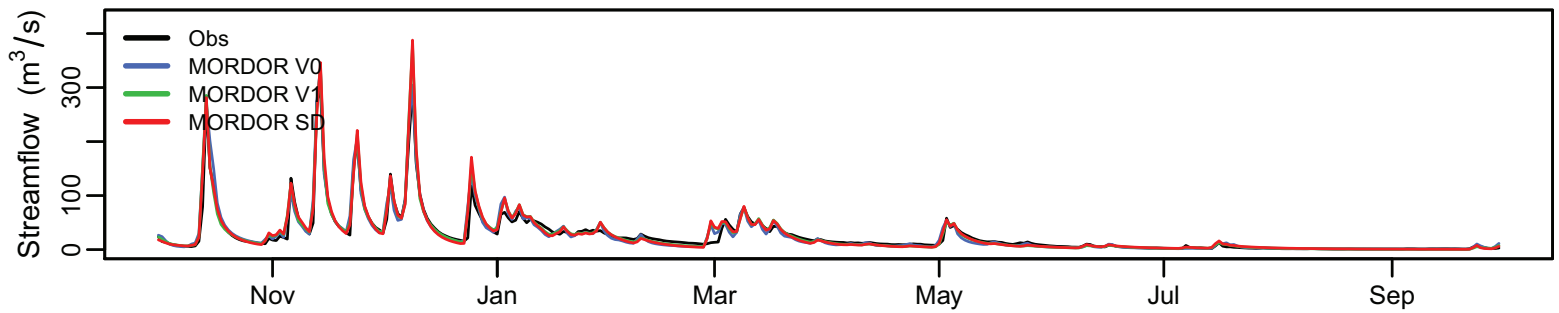

Year 2002

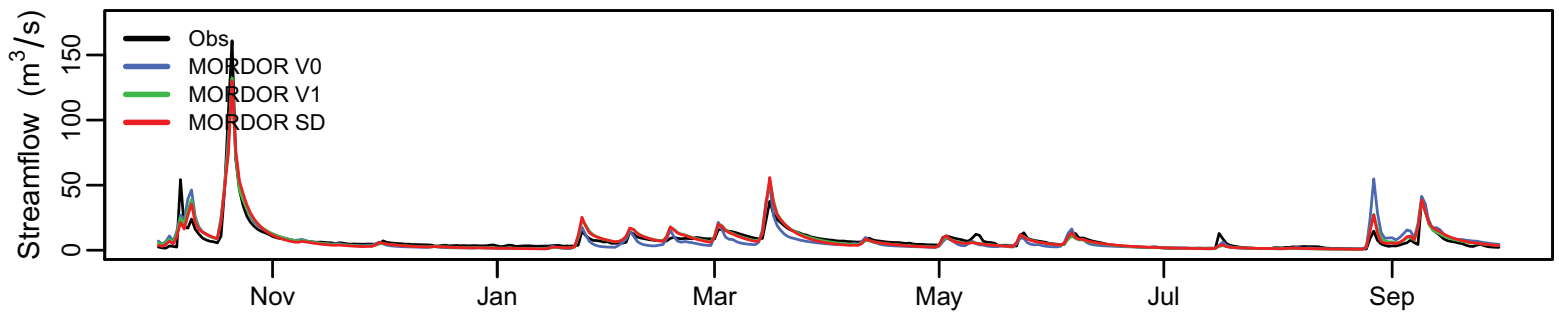

Year 2003

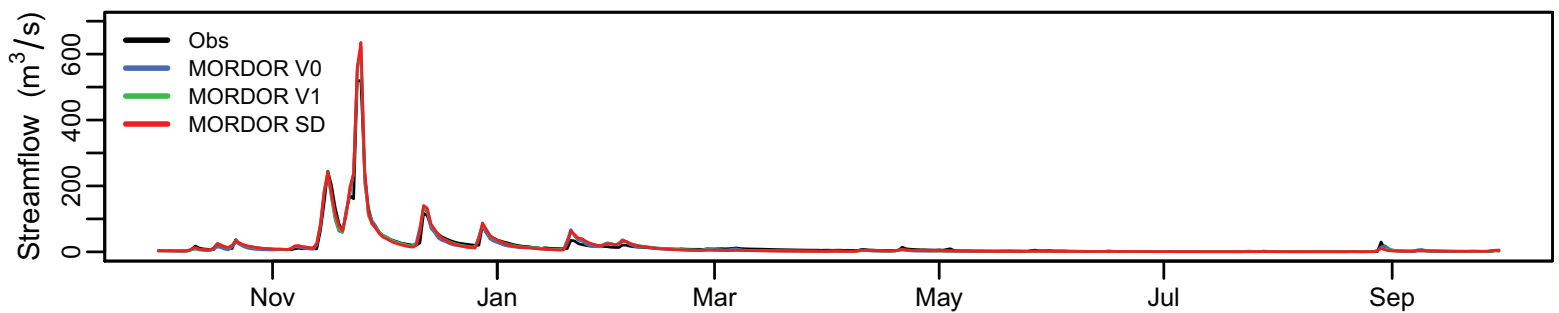

Year 2004

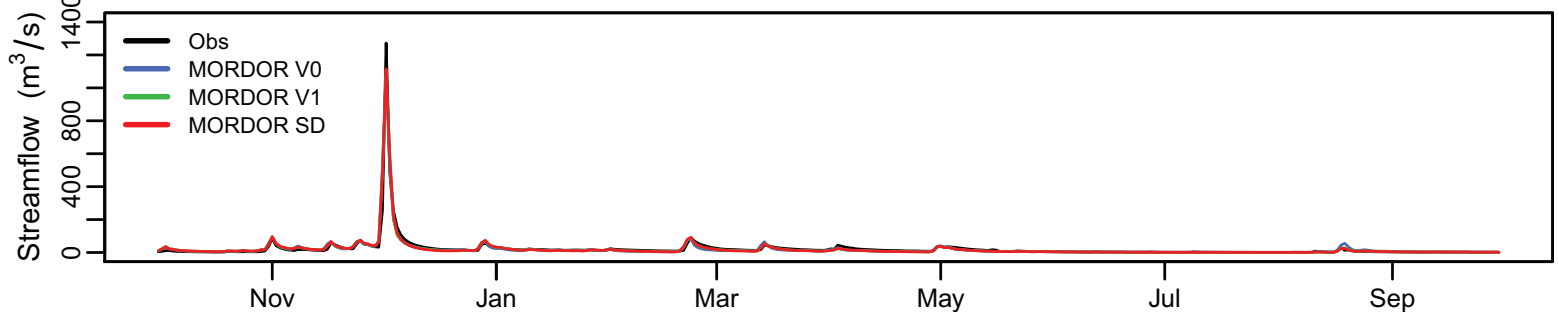

# Eyrieux@Pontpierre

Year 2005

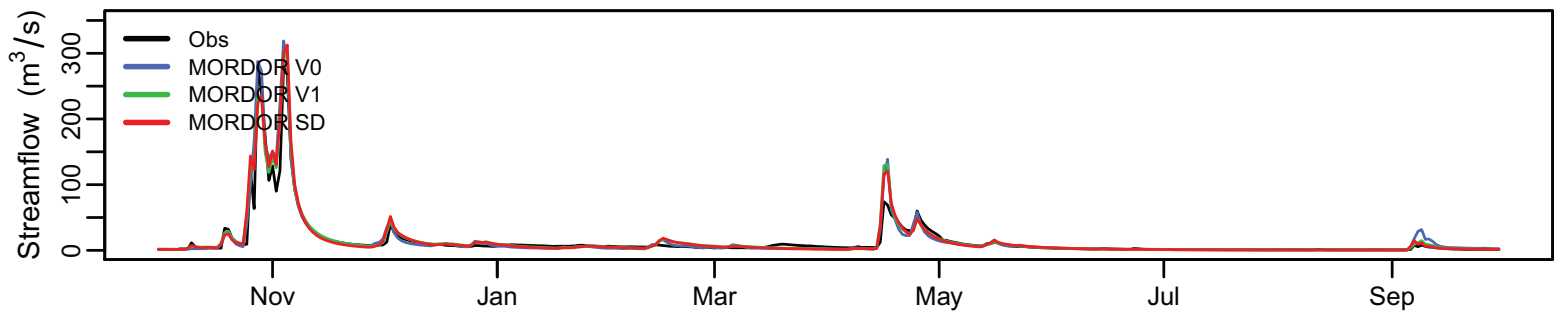

Year 2006

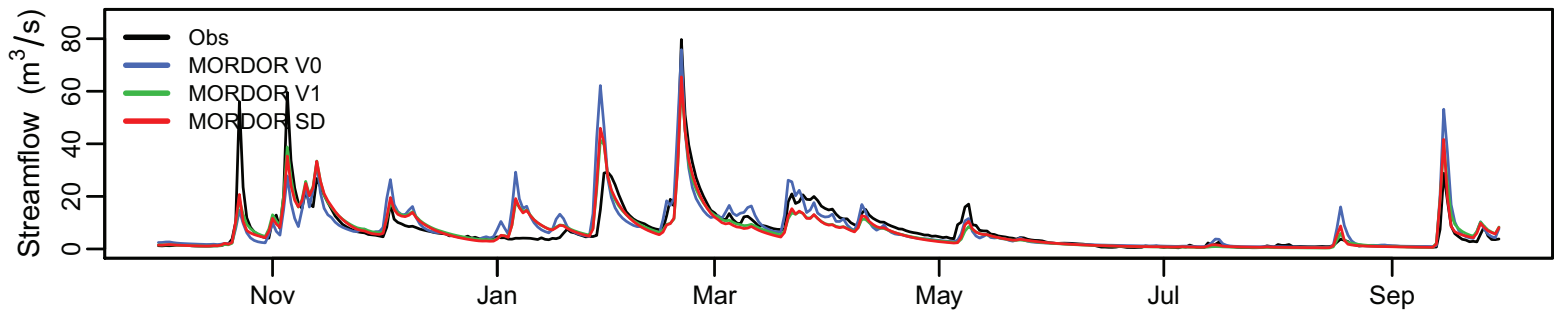

Year 2007

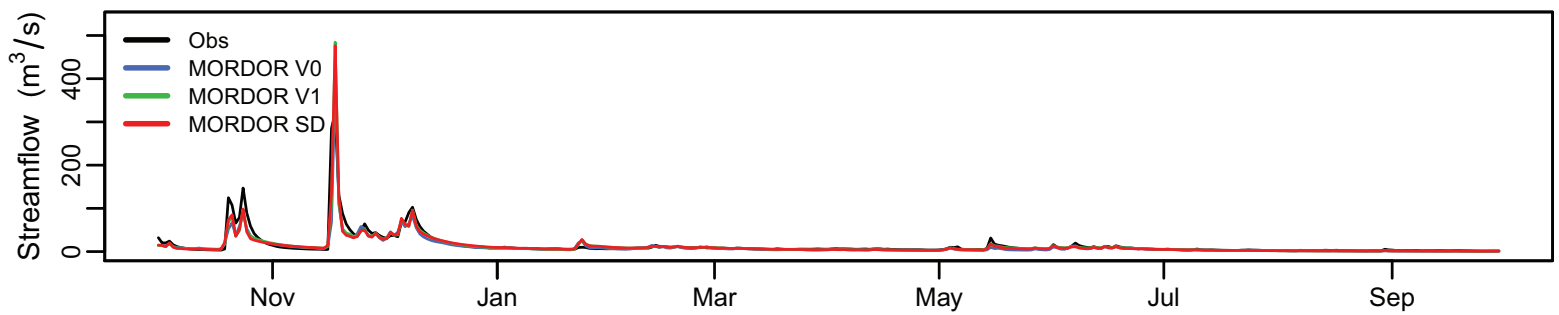

Year 2008

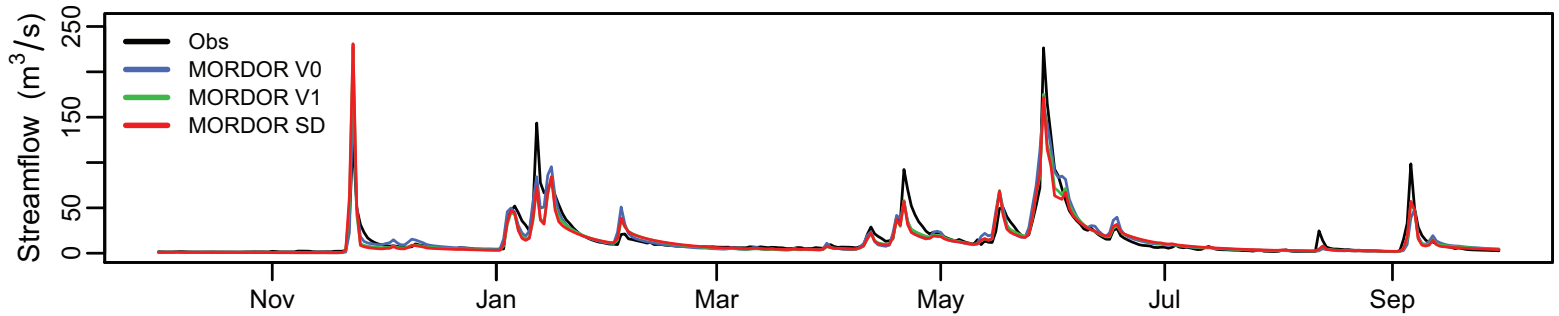

Year 2009

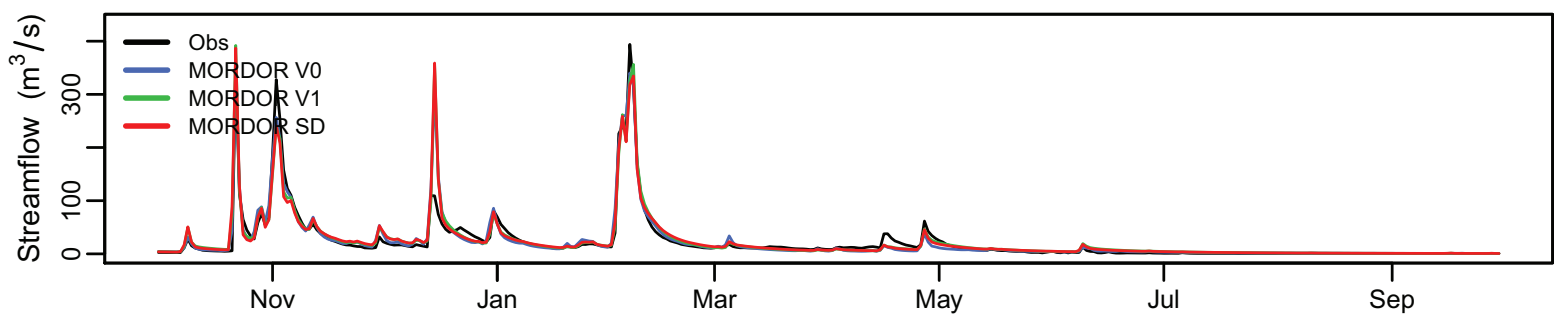

Year 2010

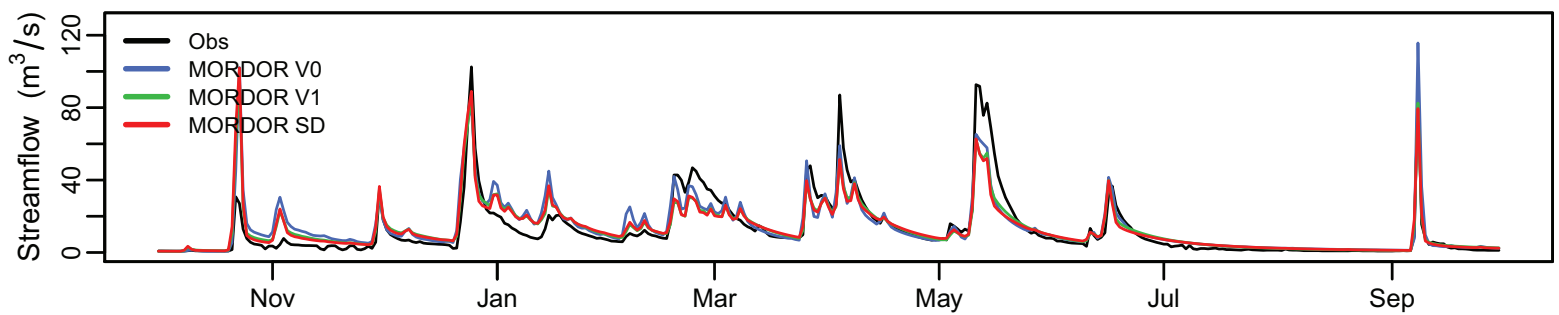

# Eyrieux@Pontpierre

Year 2011

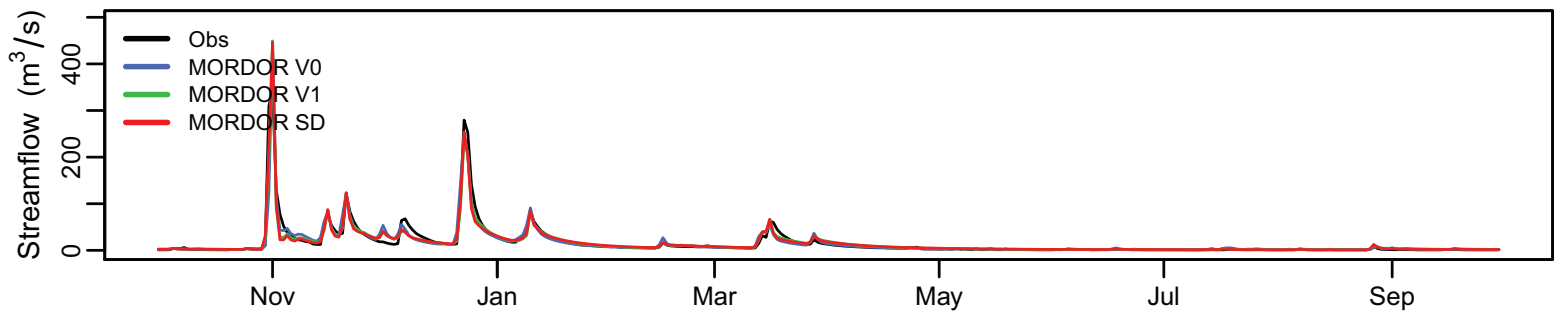

## Year 2012

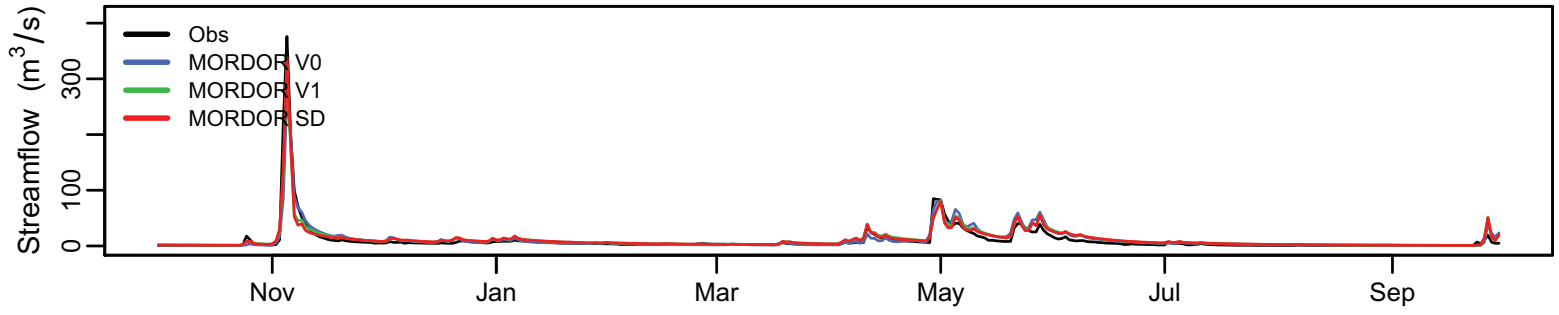

## Year 2013

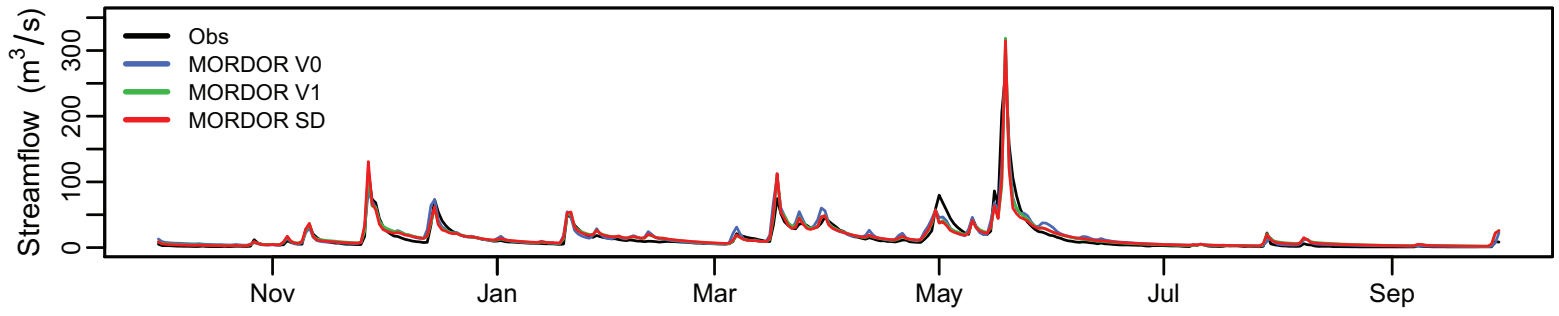

# Gage@Gagell

Year 1993

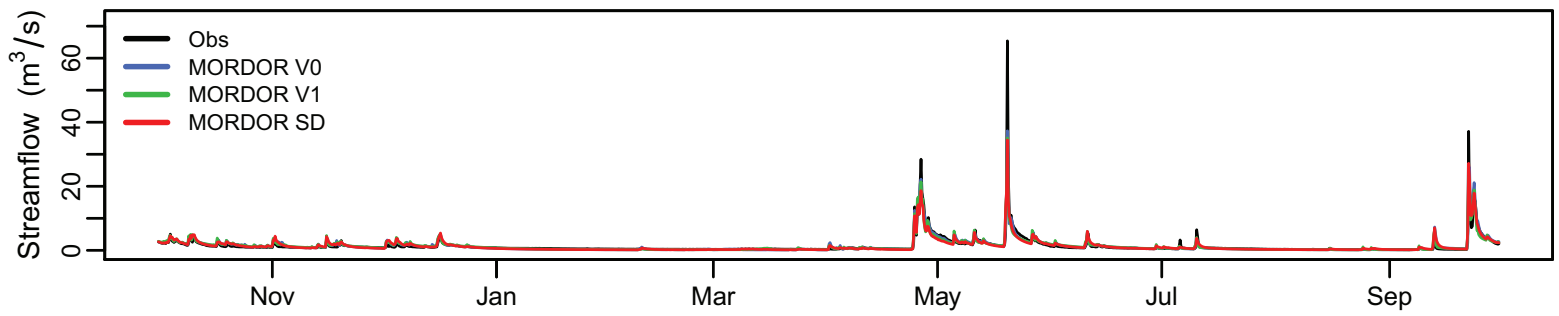

Year 1994

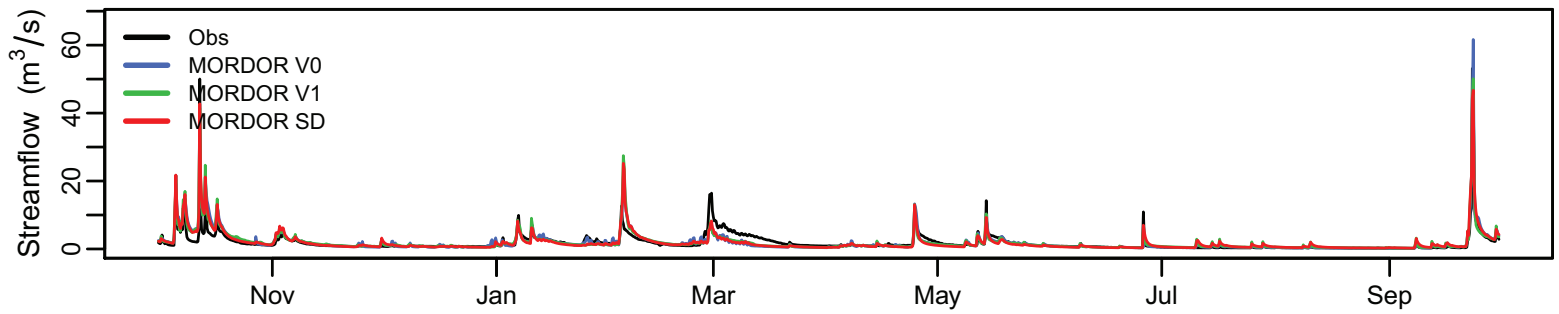

Year 1995

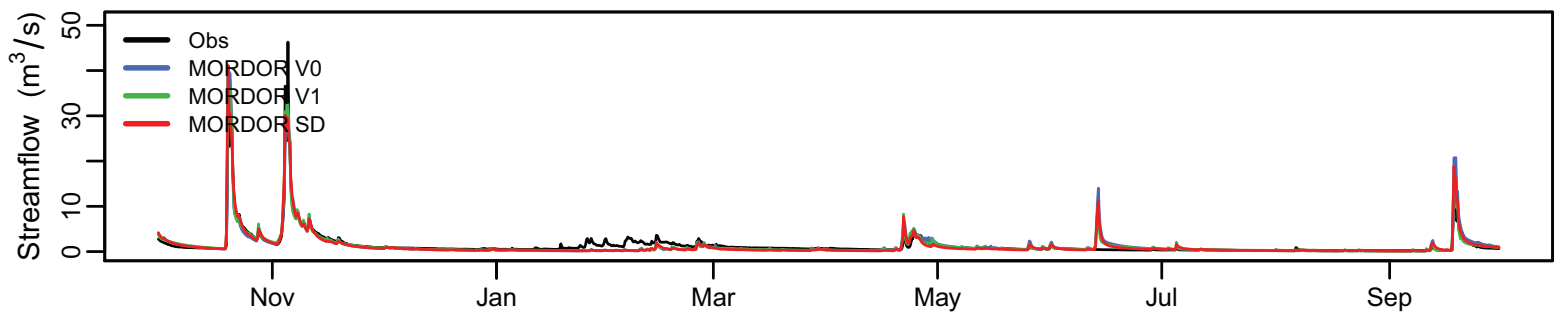

Year 1996

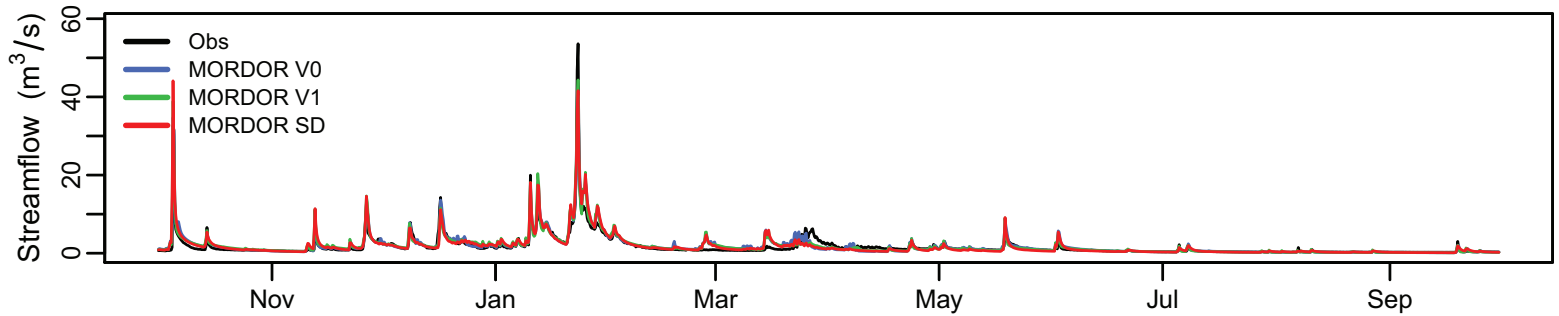

Year 1997

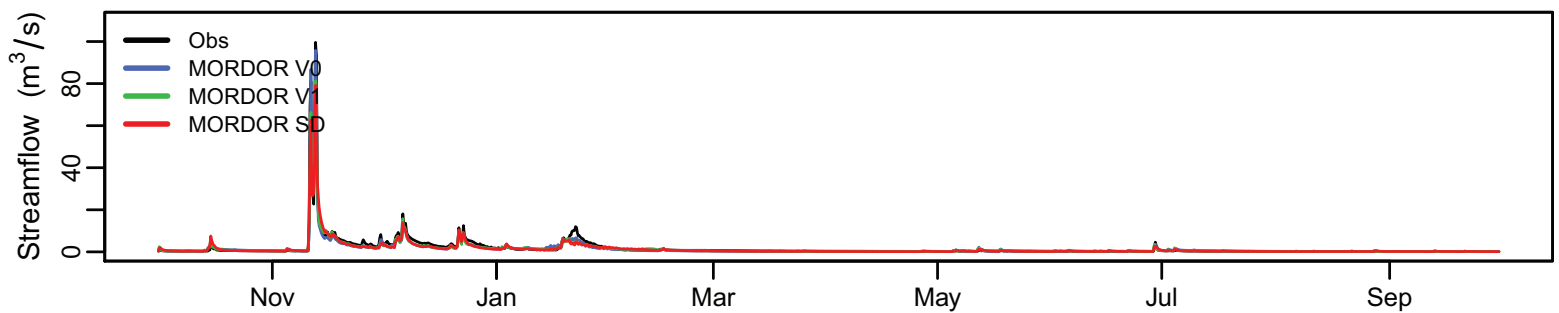

Year 1998

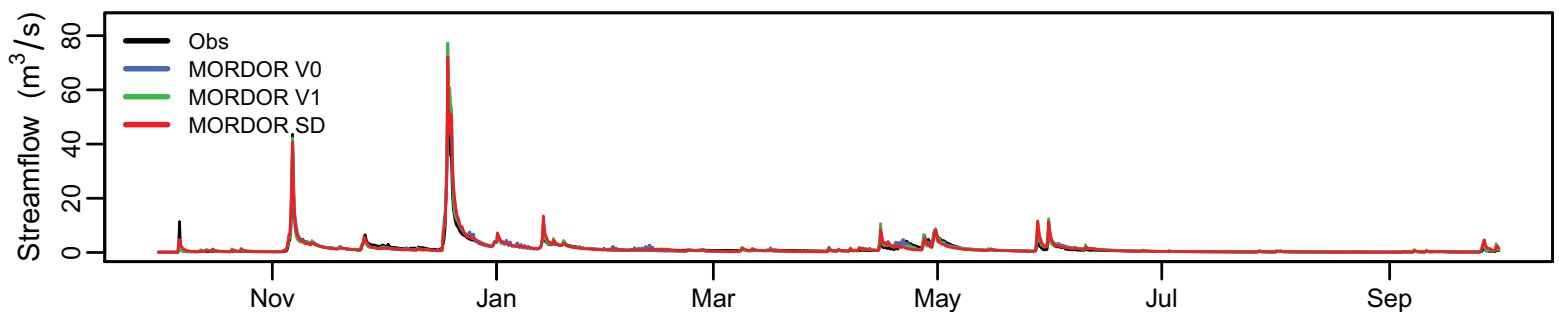

# Gage@Gagell

Year 1999

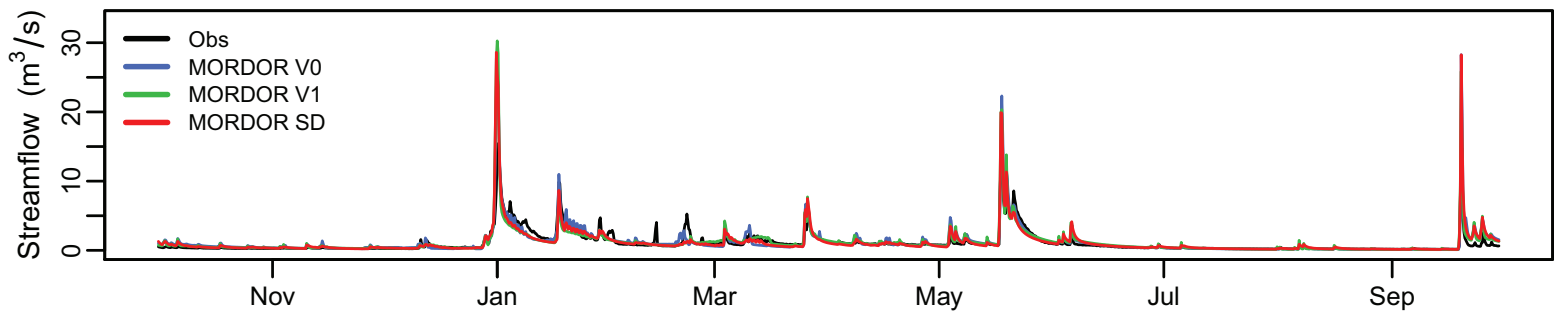

Year 2000

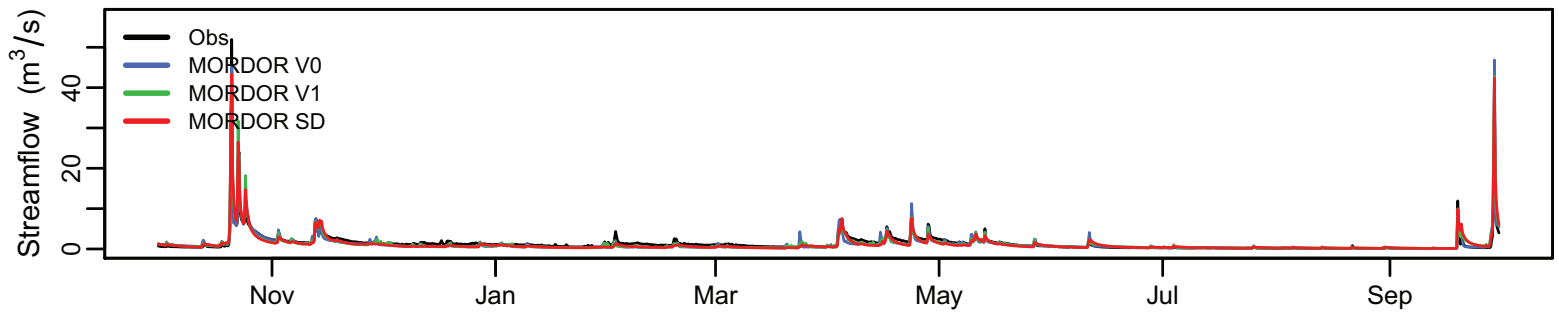

Year 2001

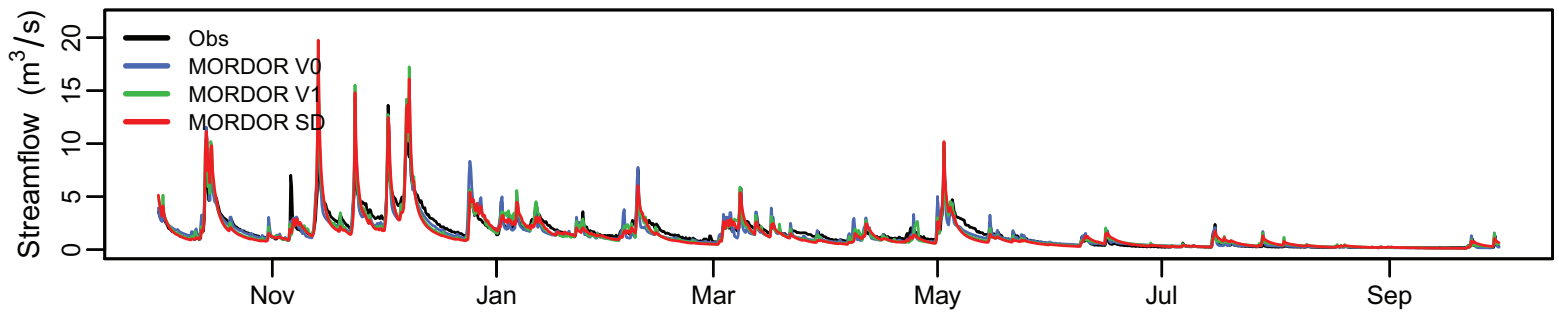

Year 2002

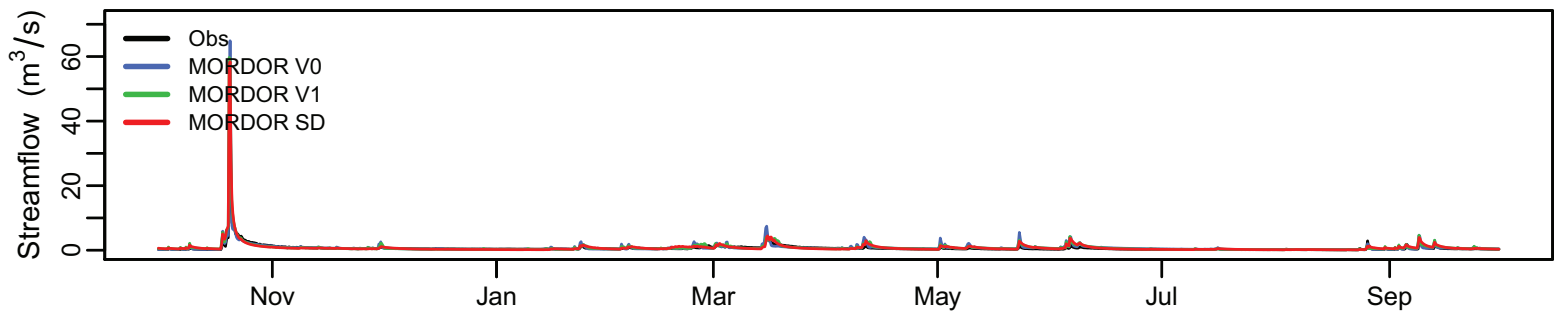

Year 2003

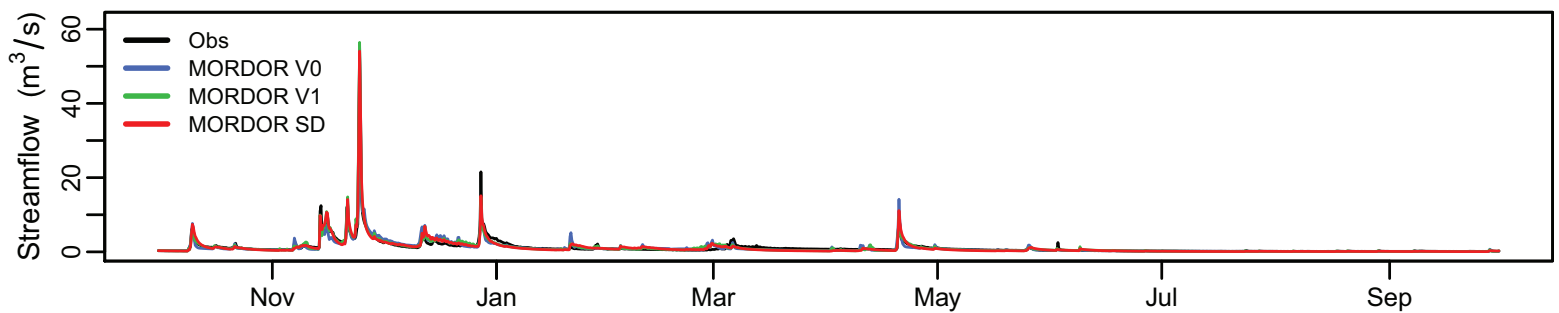

Year 2004

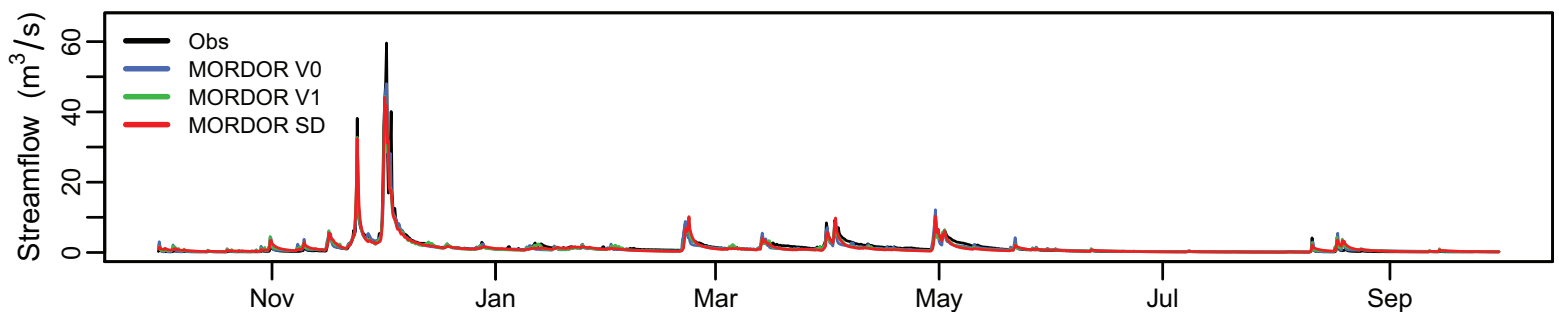

# Gage@Gagell

Year 2005

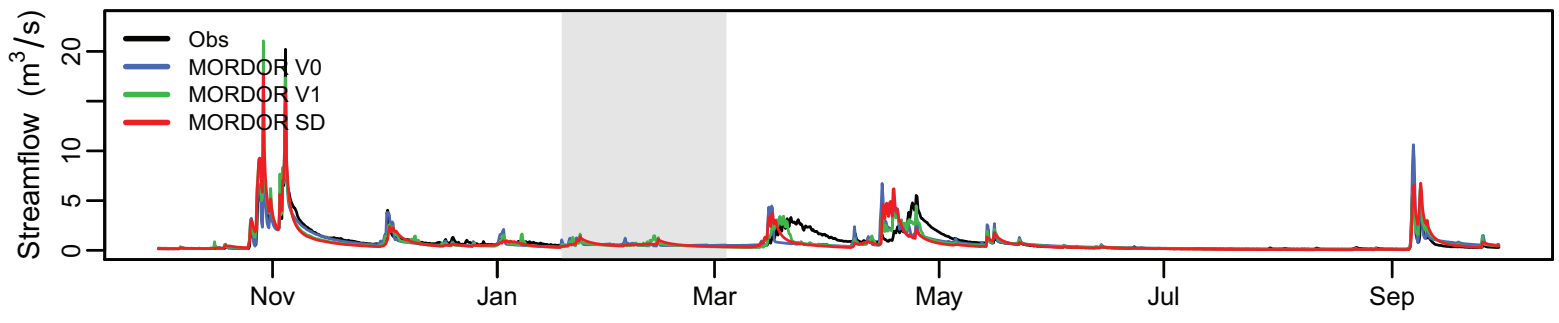

# Gardon@Corbes

Year 1987

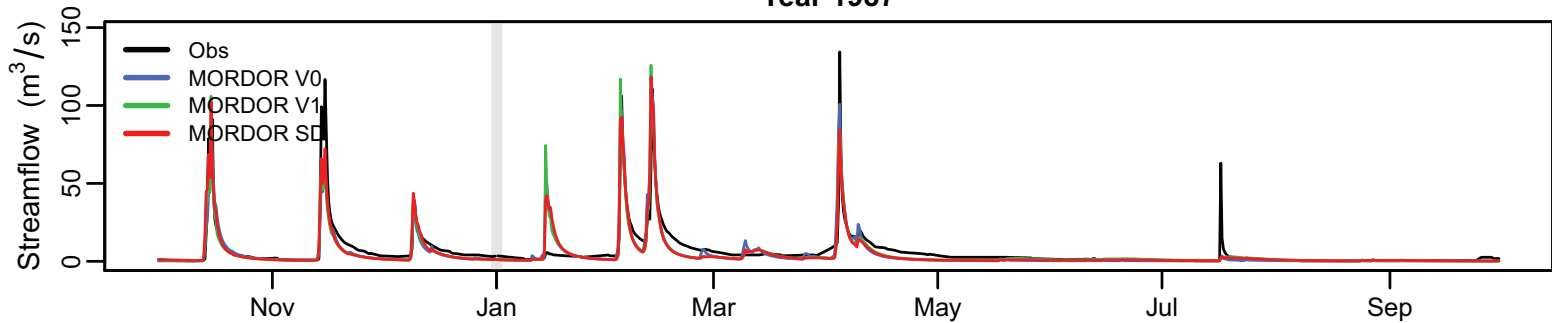

Year 1988

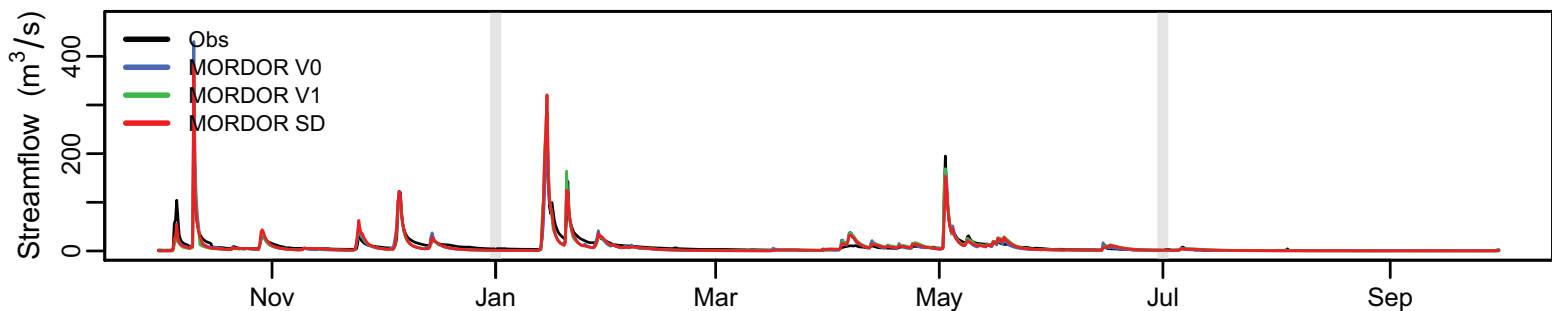

Year 1989

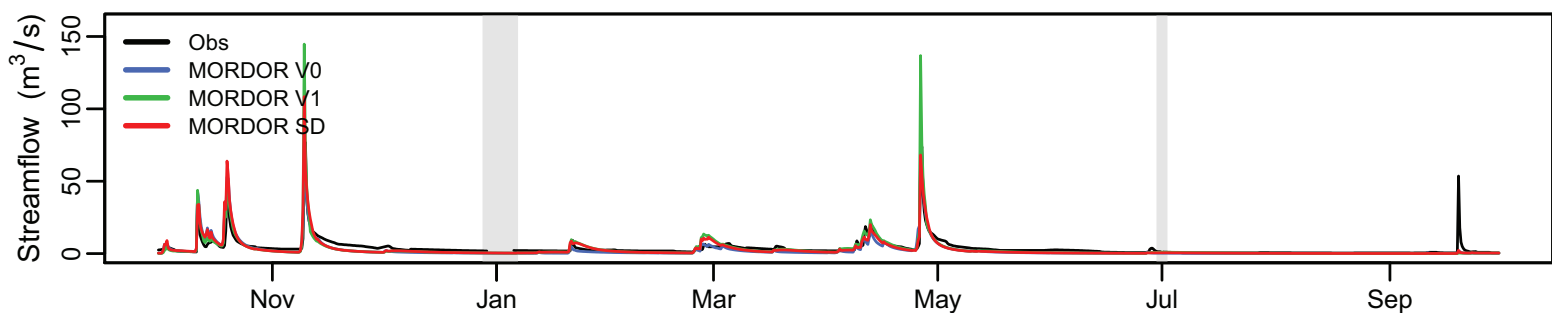

Year 1990

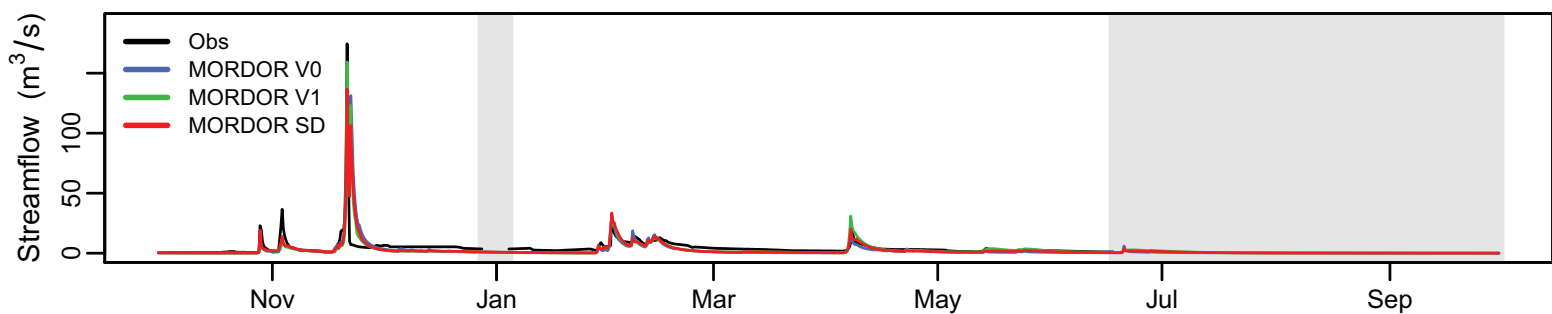

Year 1991

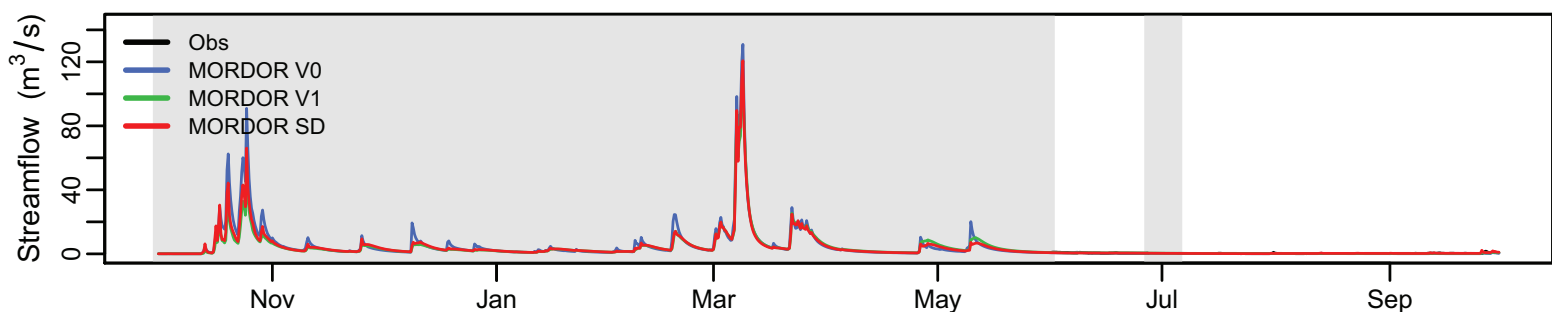

Year 1992

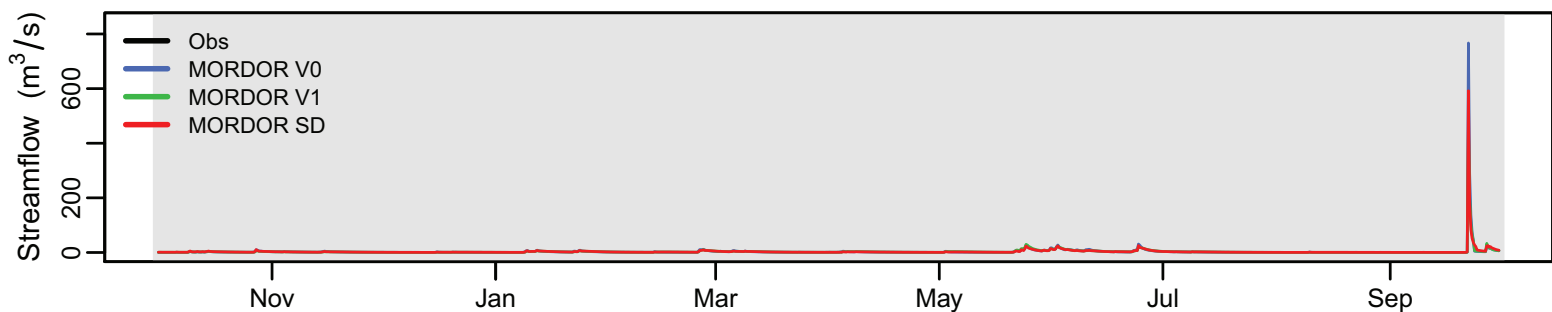

# Gardon@Corbes

Year 1993

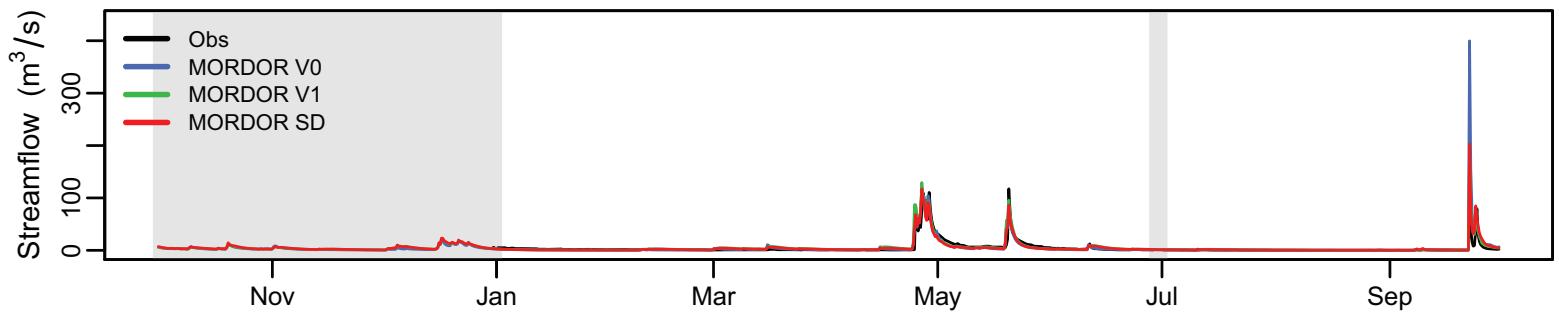

Year 1994

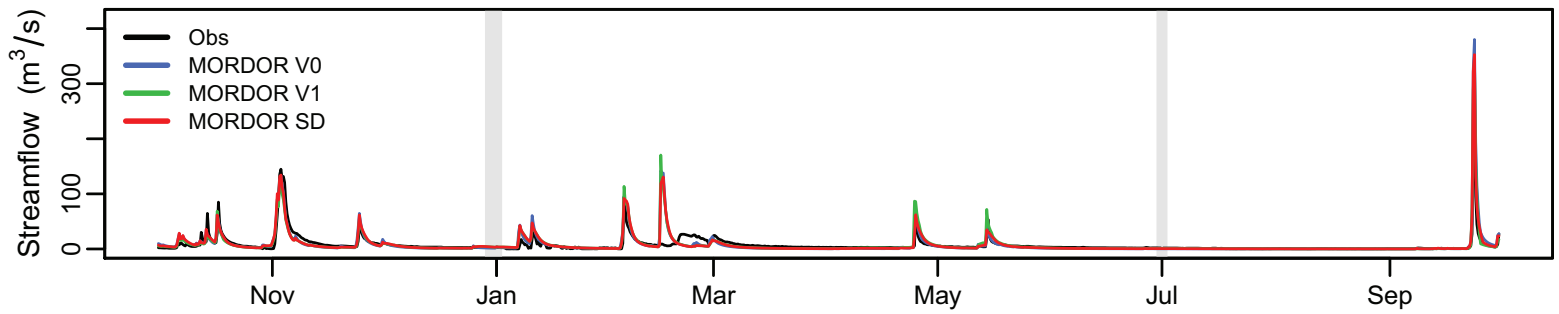

Year 1995

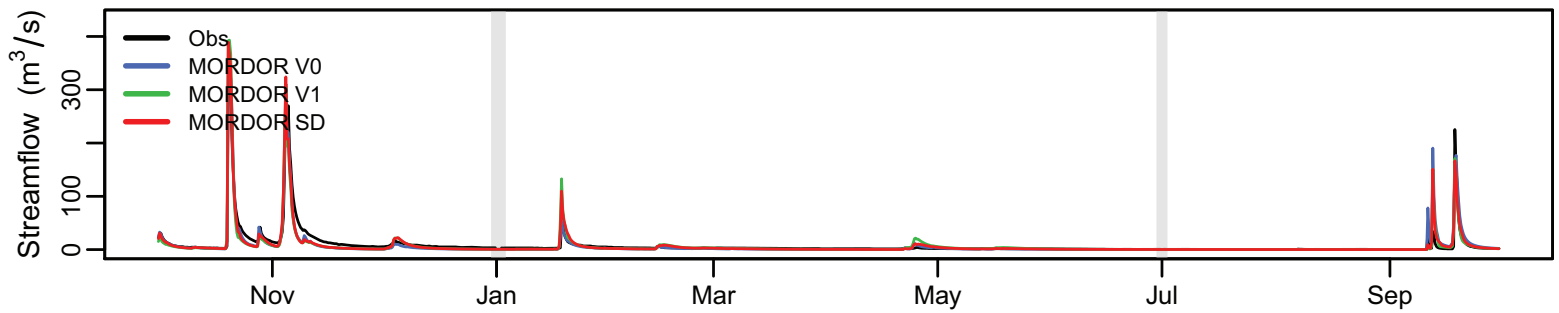

Year 1996

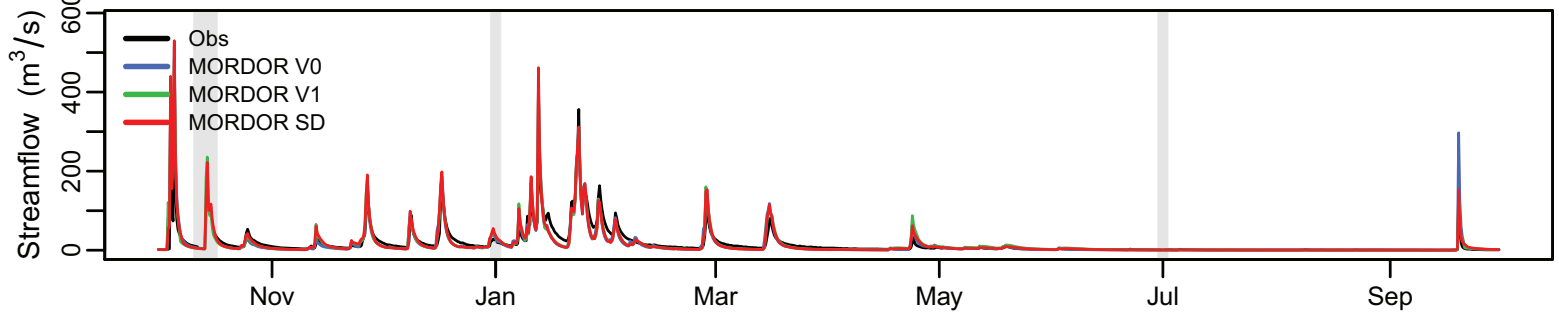

Year 1997

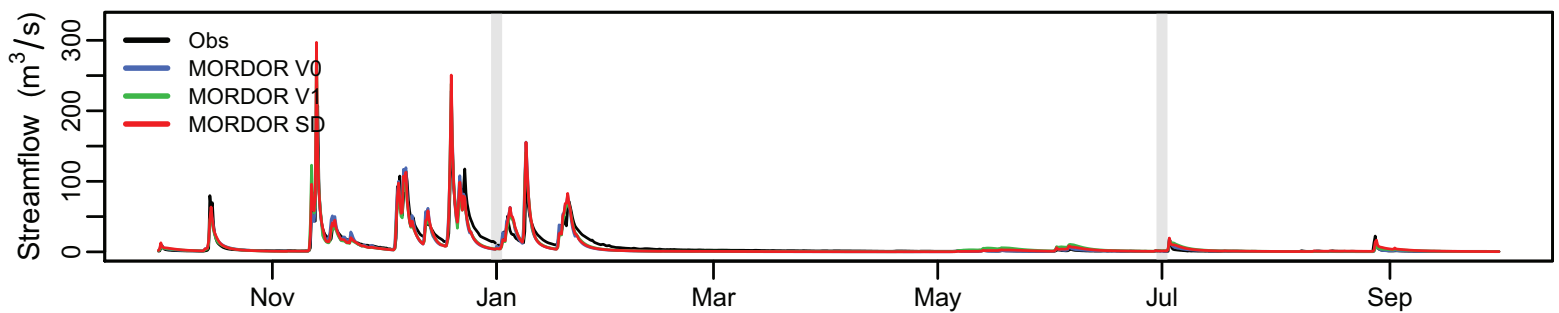

Year 1998

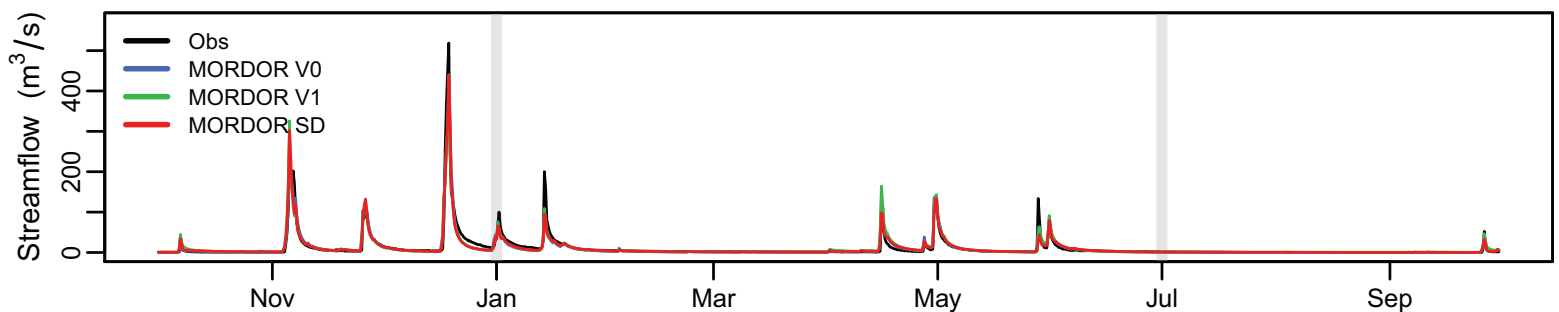



# Gardon@Corbes

Year 1999

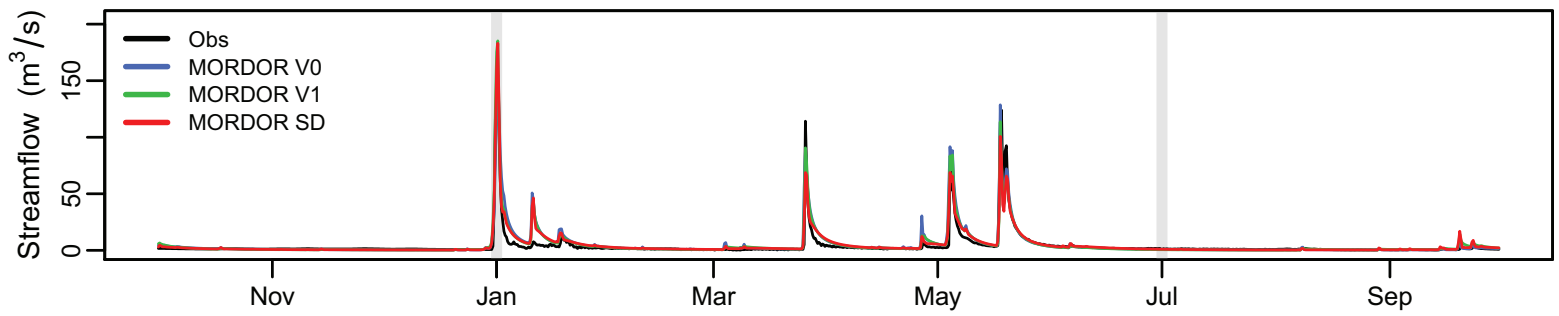

Year 2000

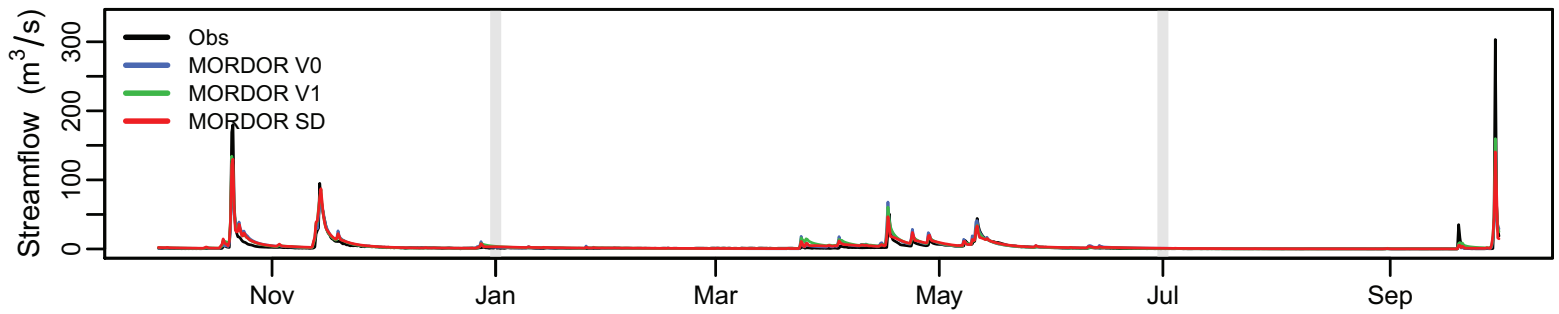

Year 2001

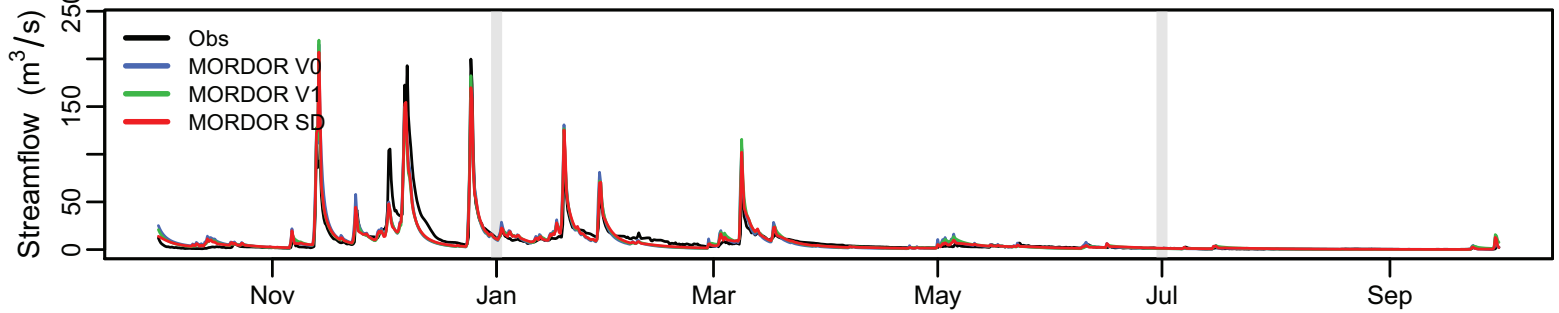

Year 2002

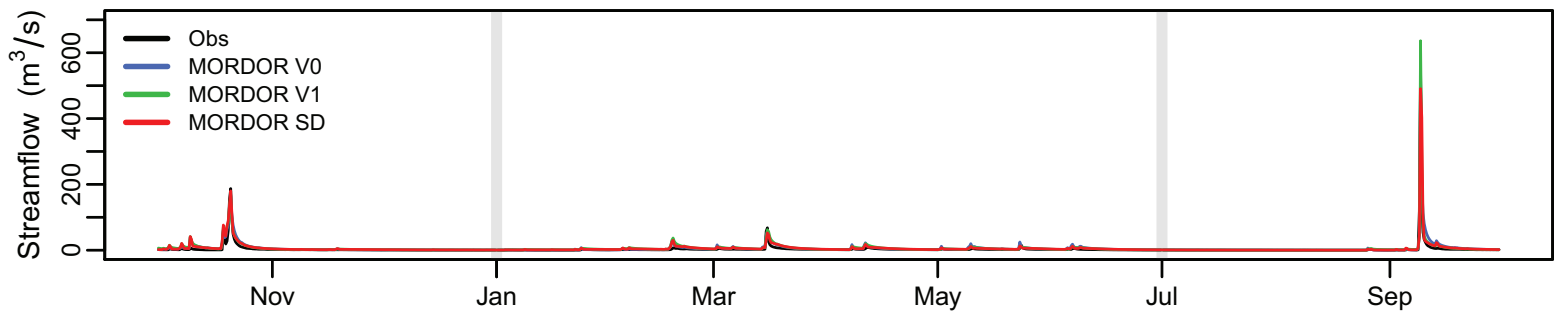

Year 2003

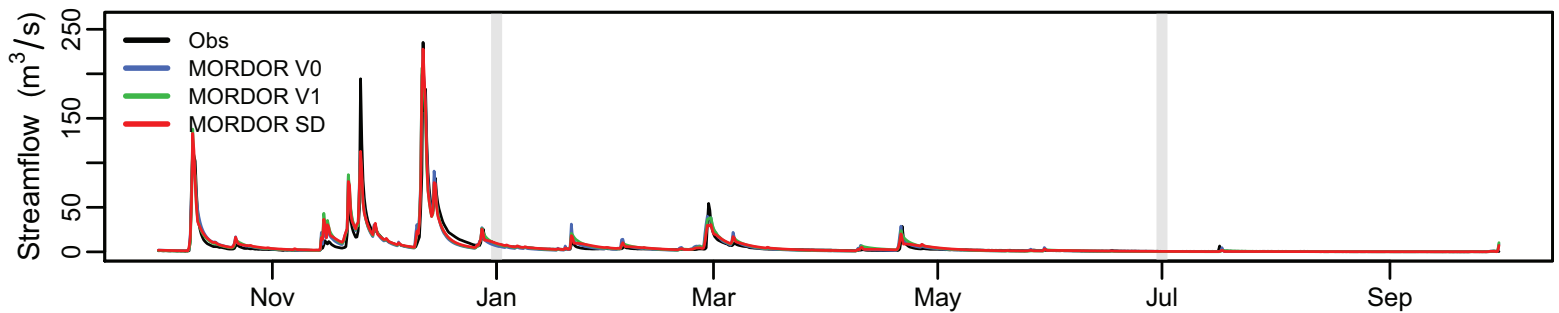

Year 2004

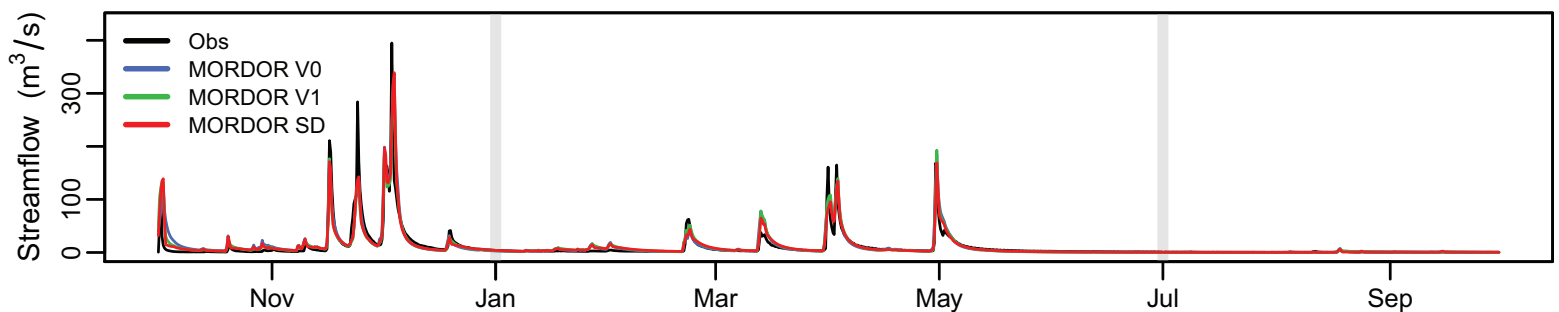

# Gardon@Corbes

Year 2005

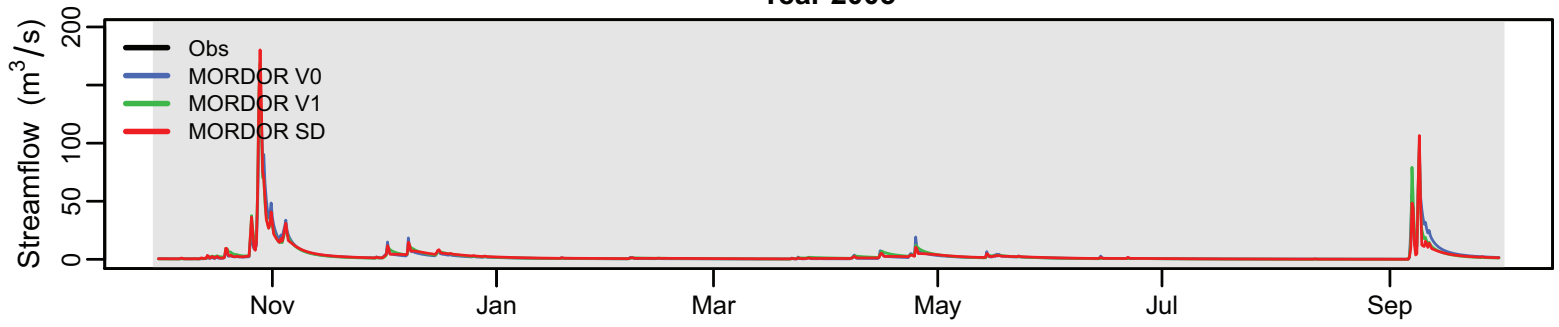

Year 2006

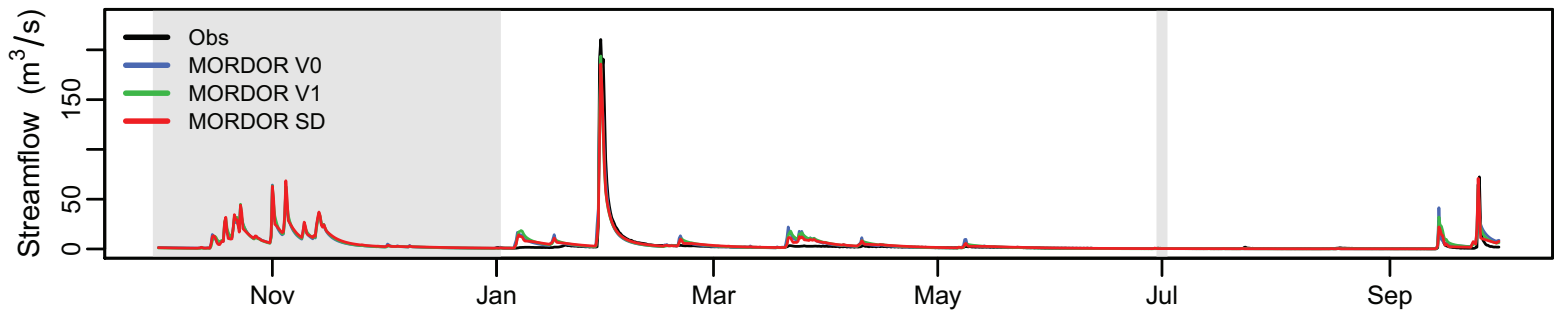

Year 2007

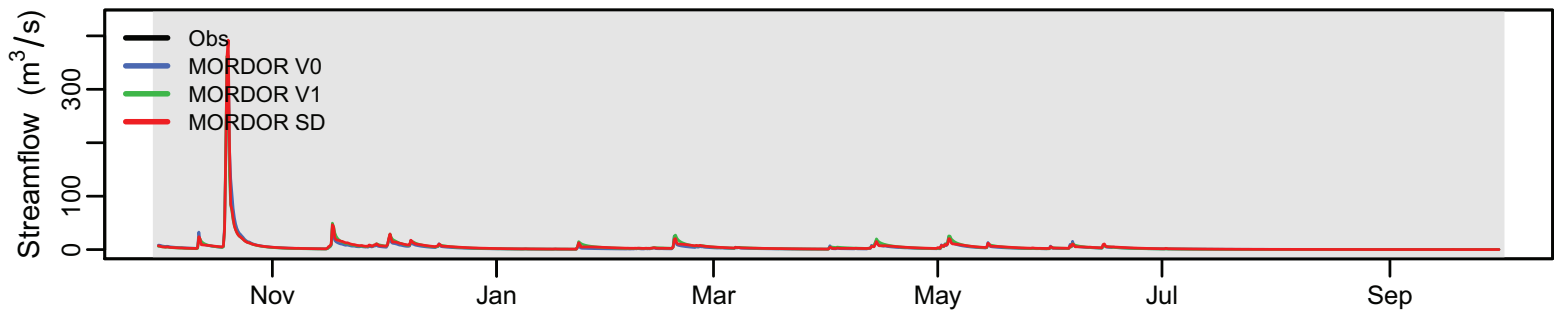

# Gardon@Generargues

Year 1987

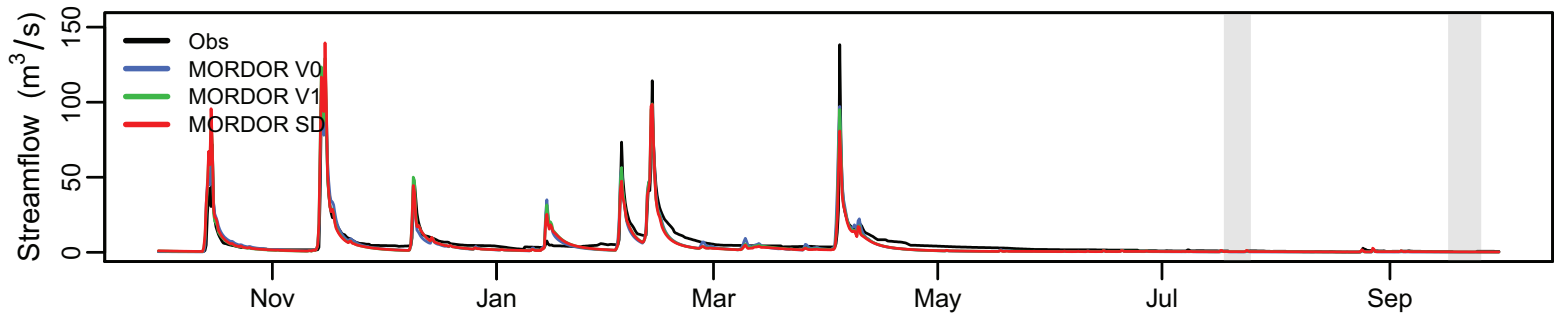

Year 1988

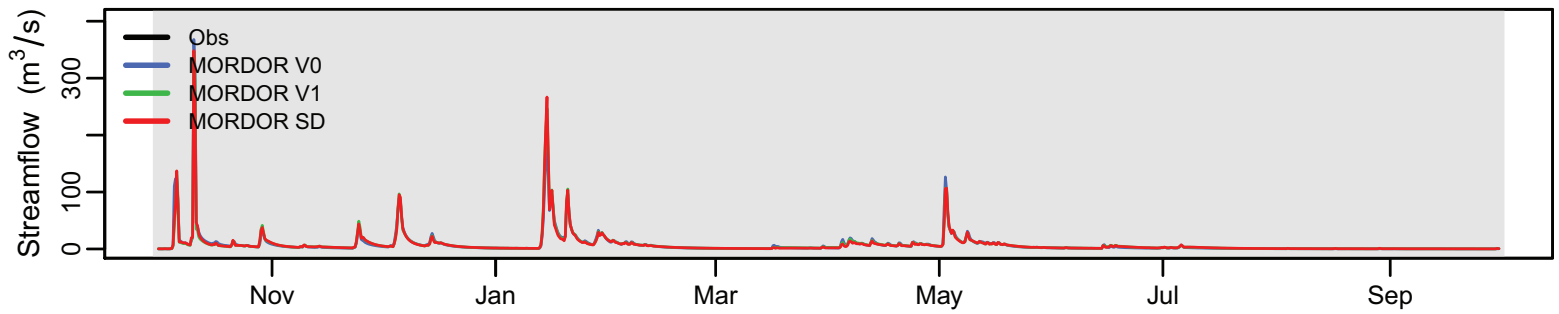

Year 1989

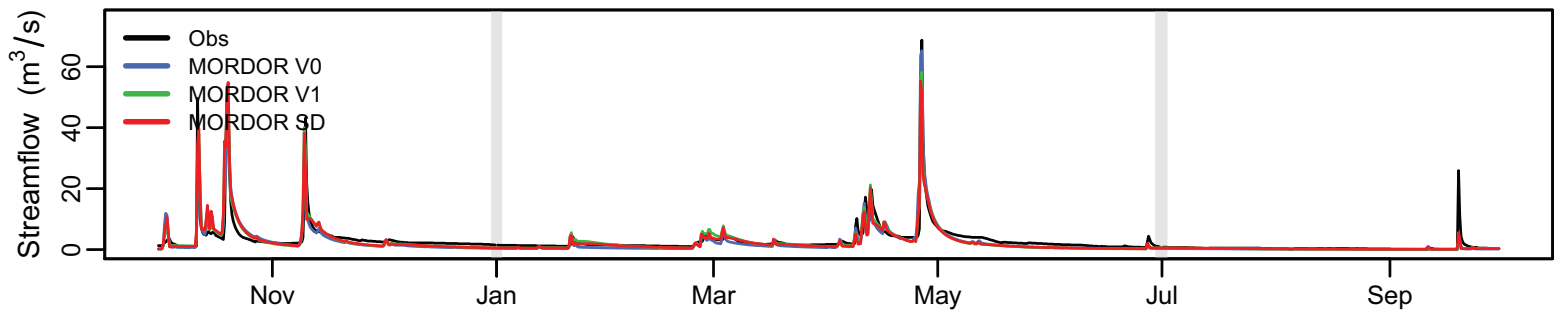

Year 1990

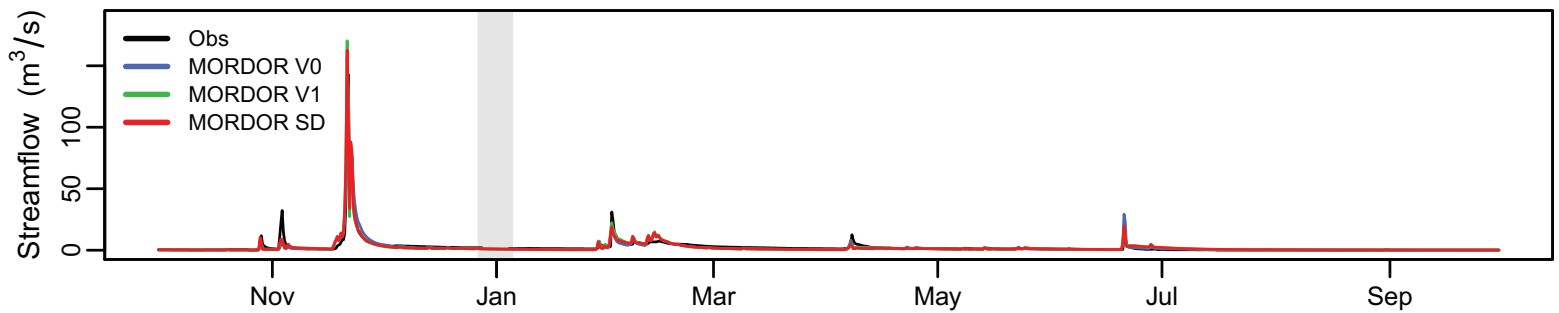

Year 1991

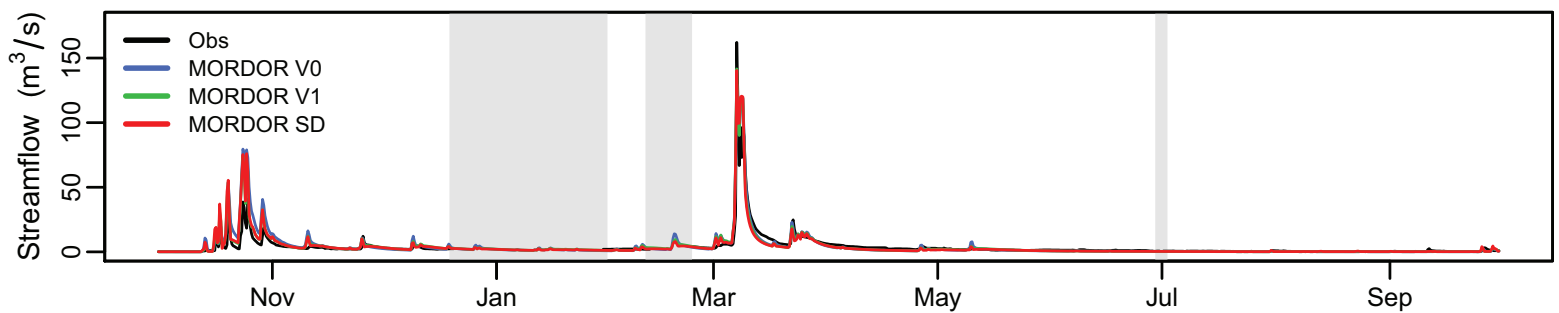

Year 1992

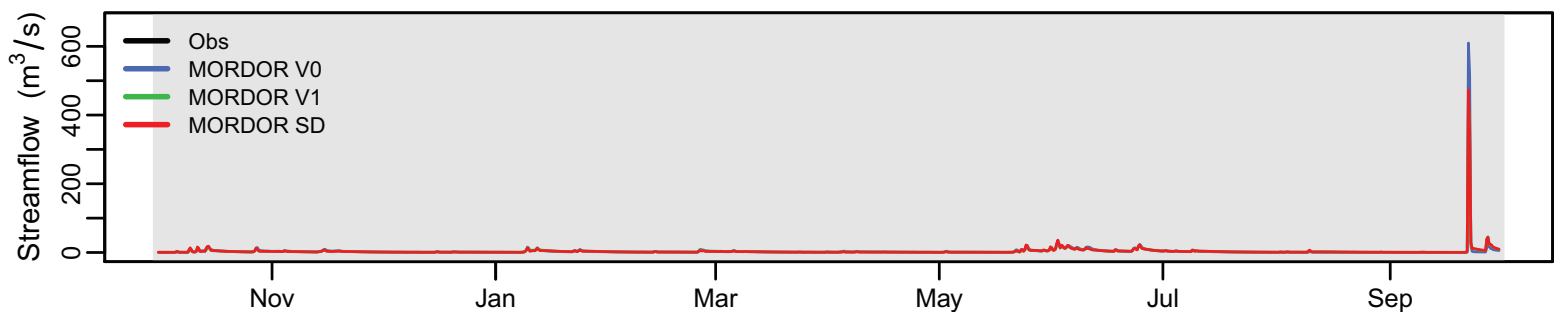

# Gardon@Generargues

Year 1993

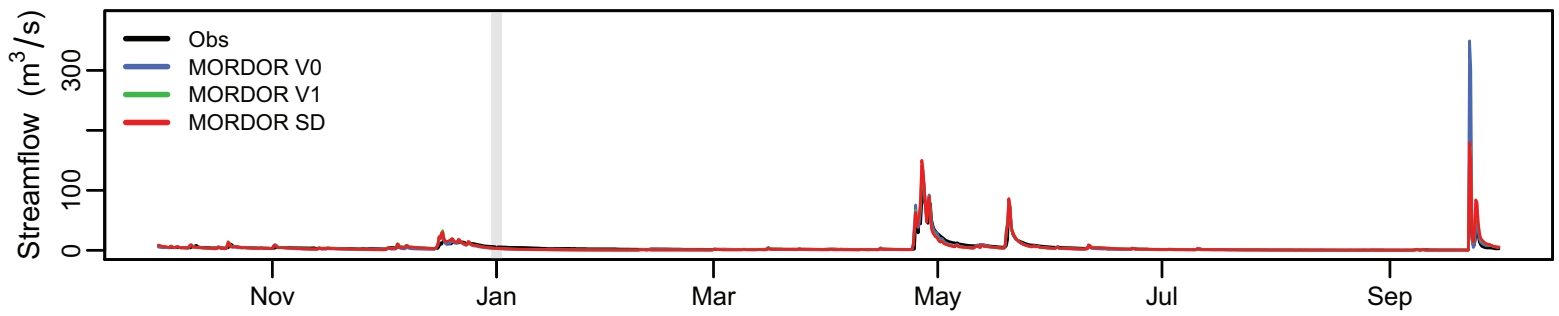

Year 1994

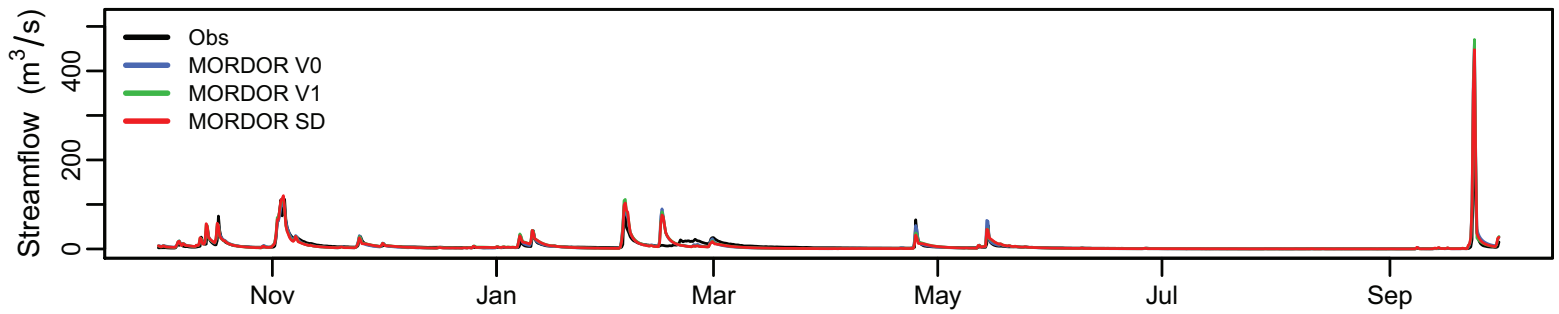

Year 1995

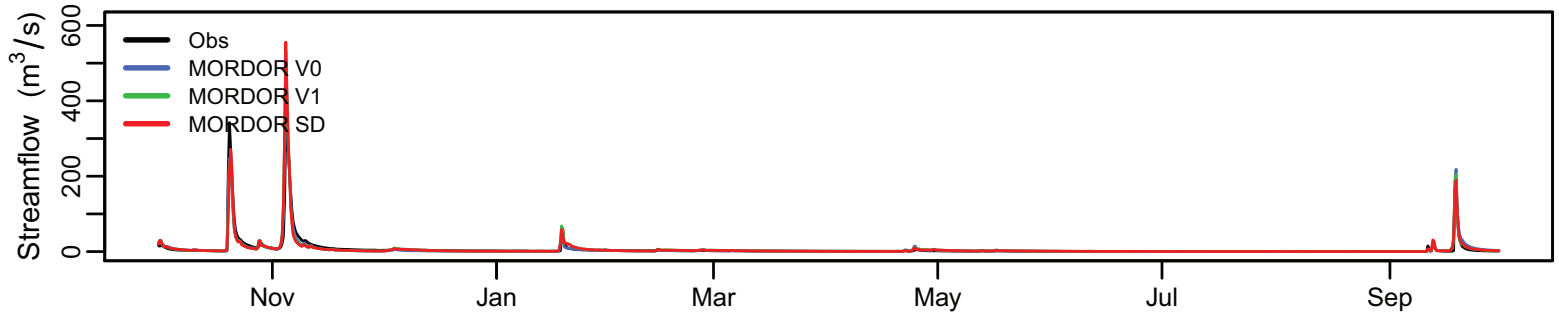

Year 1996

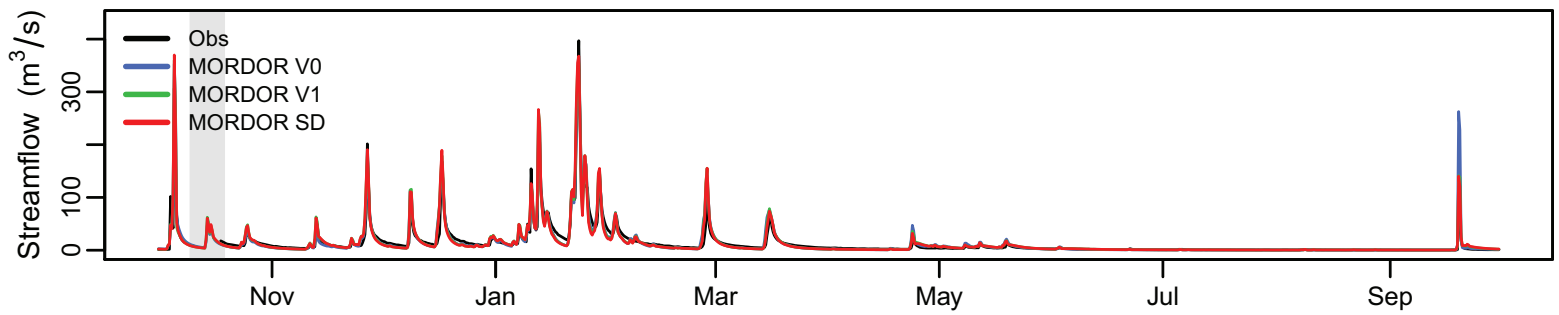

Year 1997

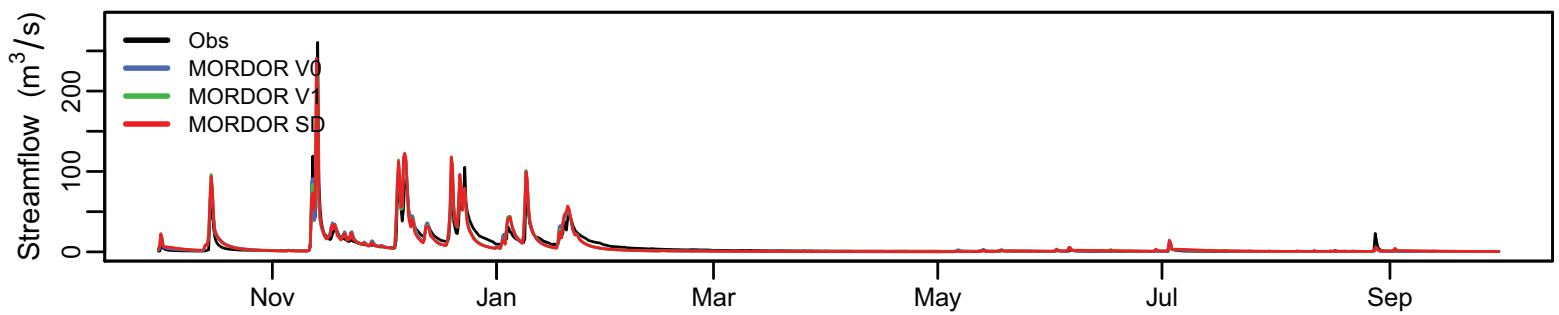

Year 1998

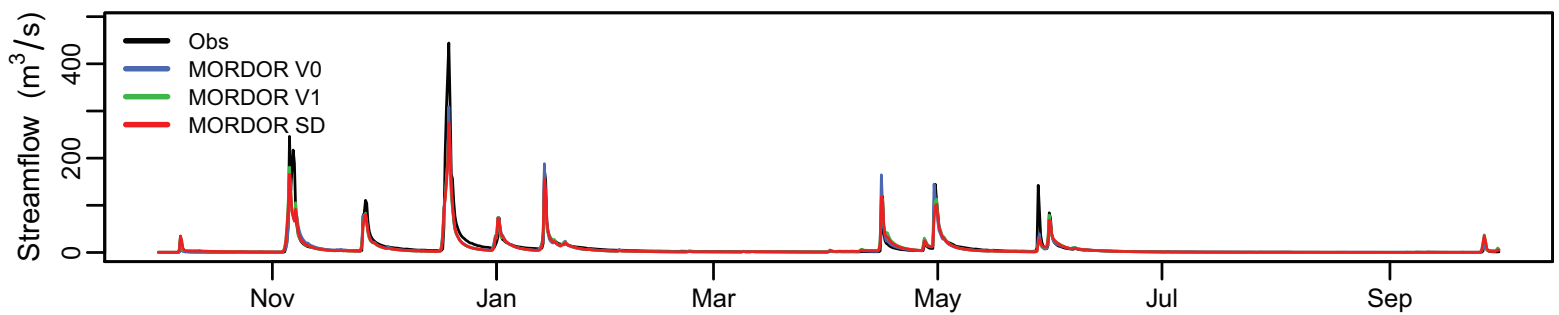

# Gardon@Generargues

Year 1999

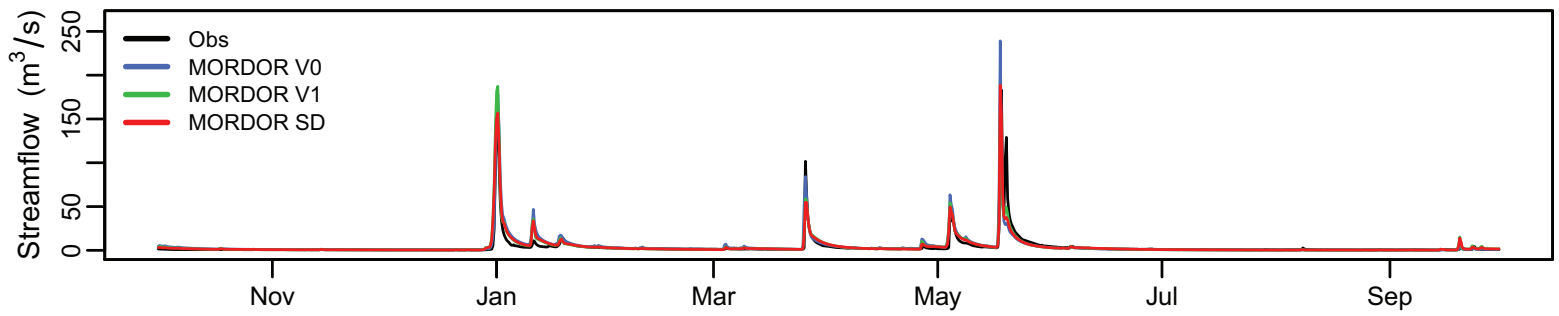

Year 2000

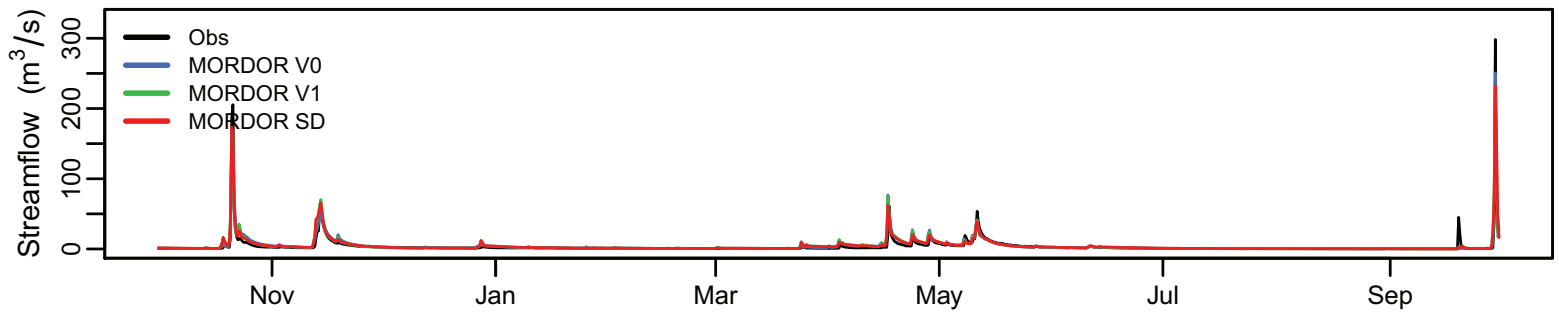

Year 2001

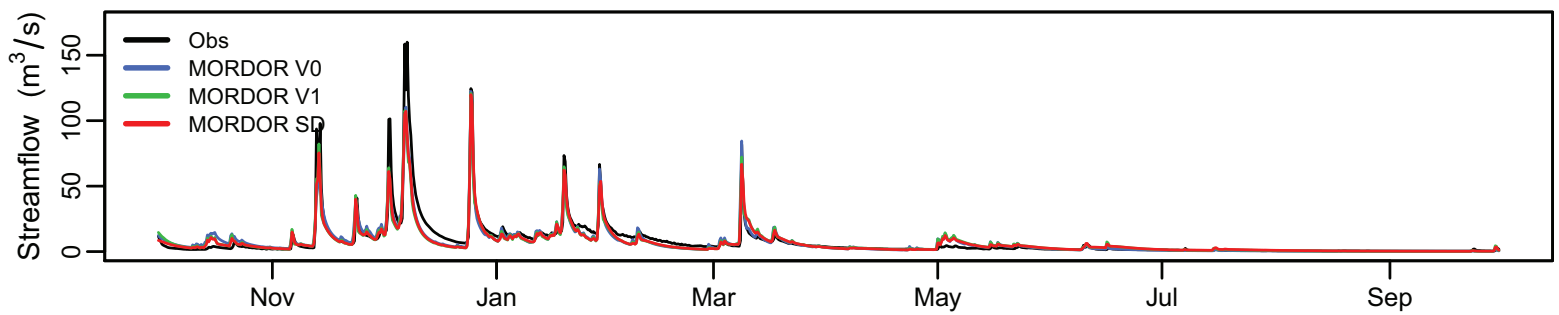

Year 2002

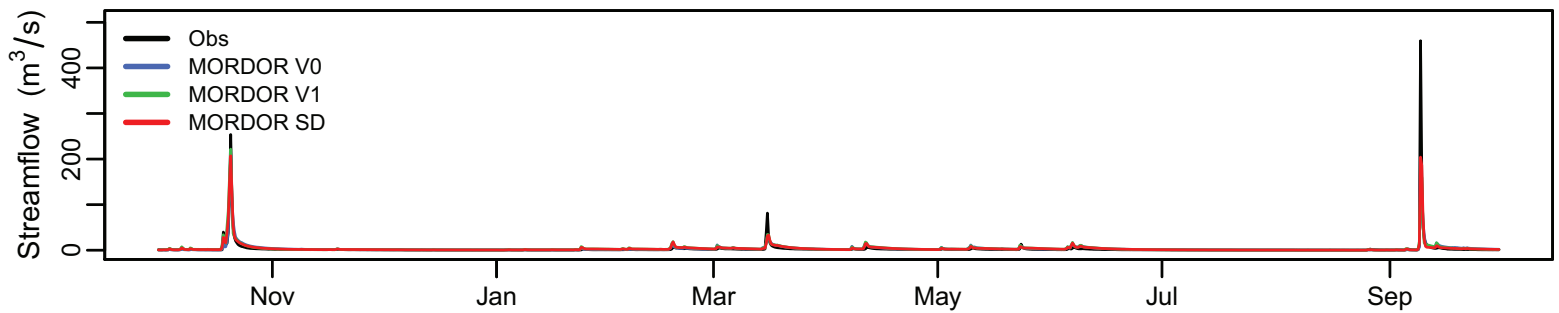

Year 2003

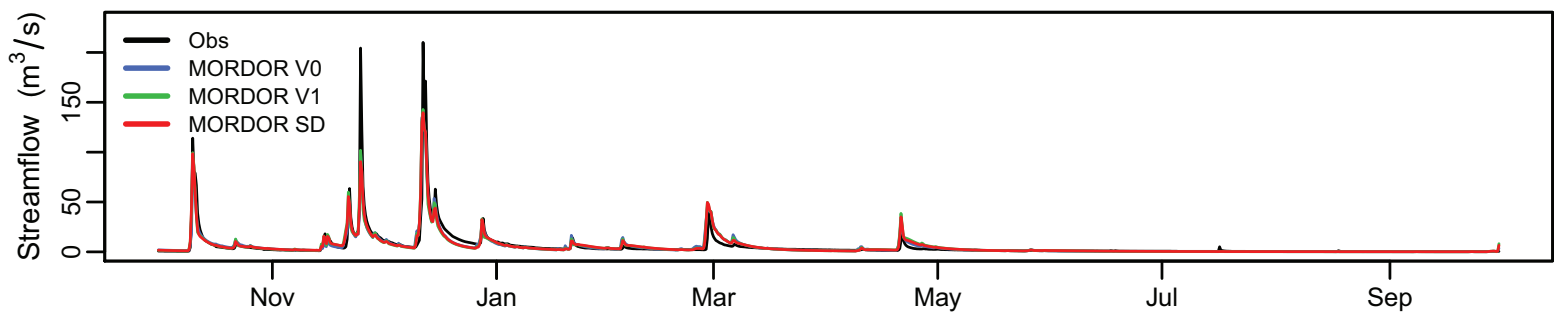

Year 2004

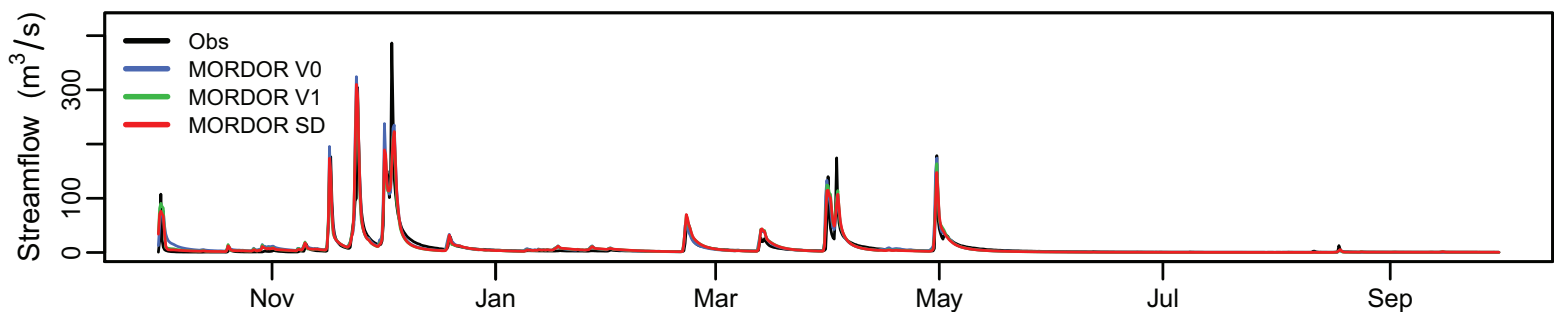

# Gardon@Generargues

Year 2005

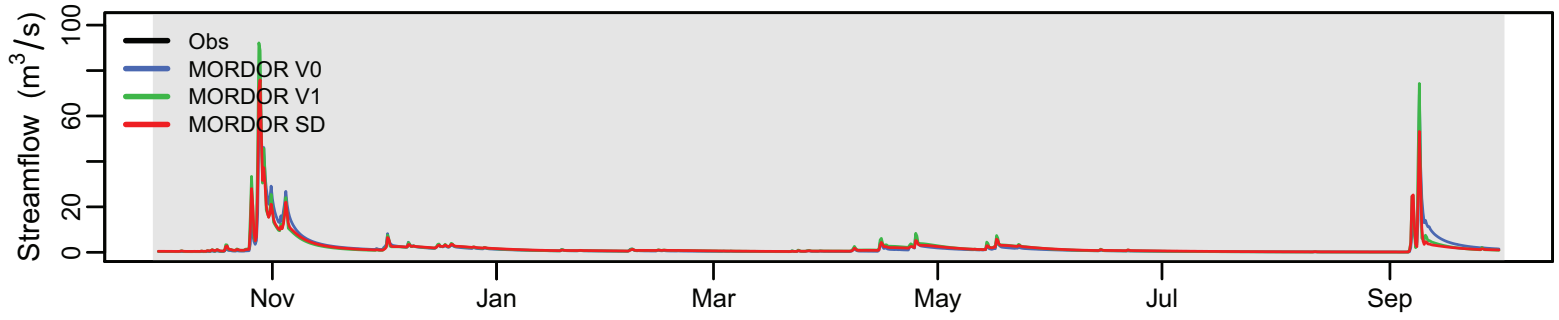

Year 2006

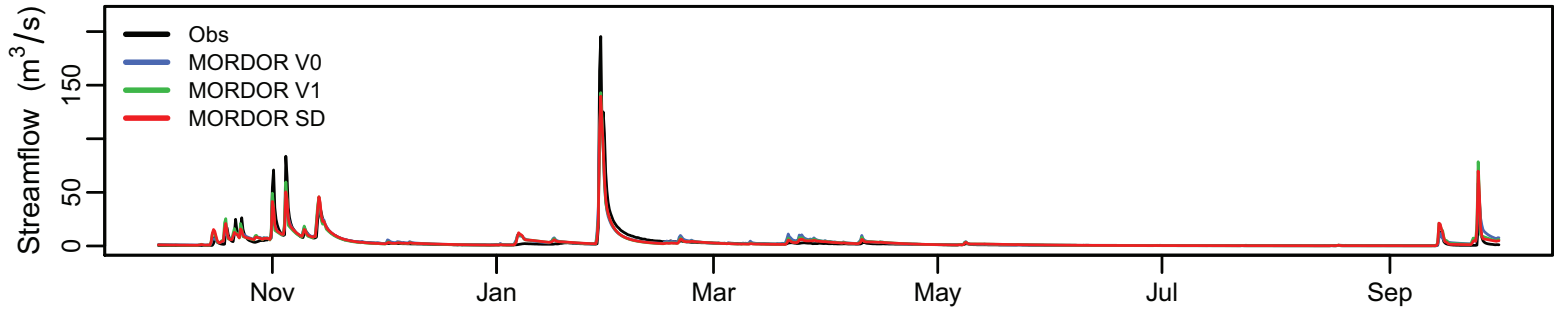

Year 2007

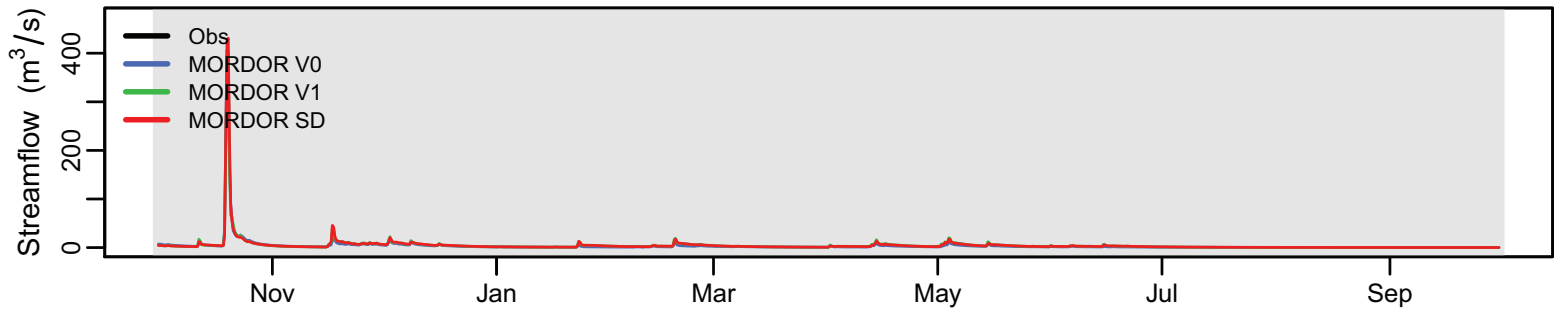

Year 2008

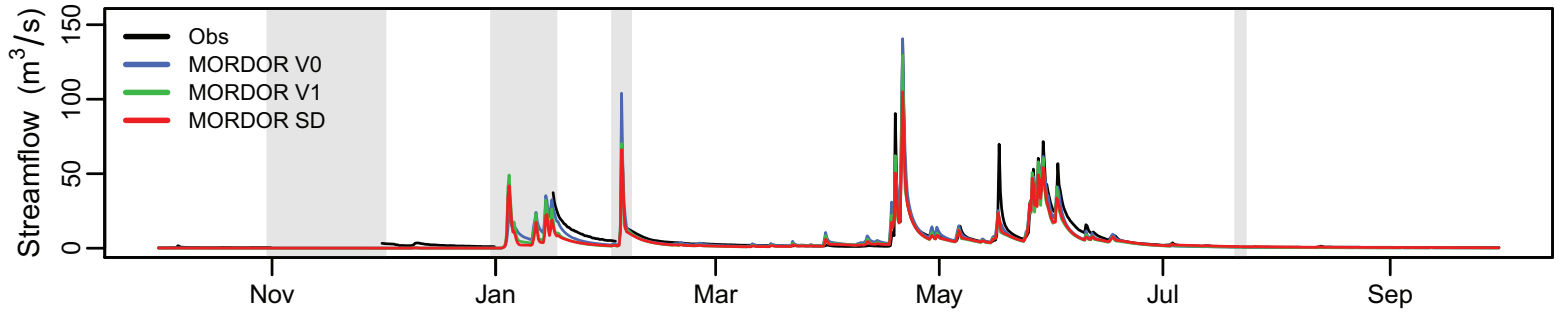

# GaveEstaubé@Gloriettes

Year 1988

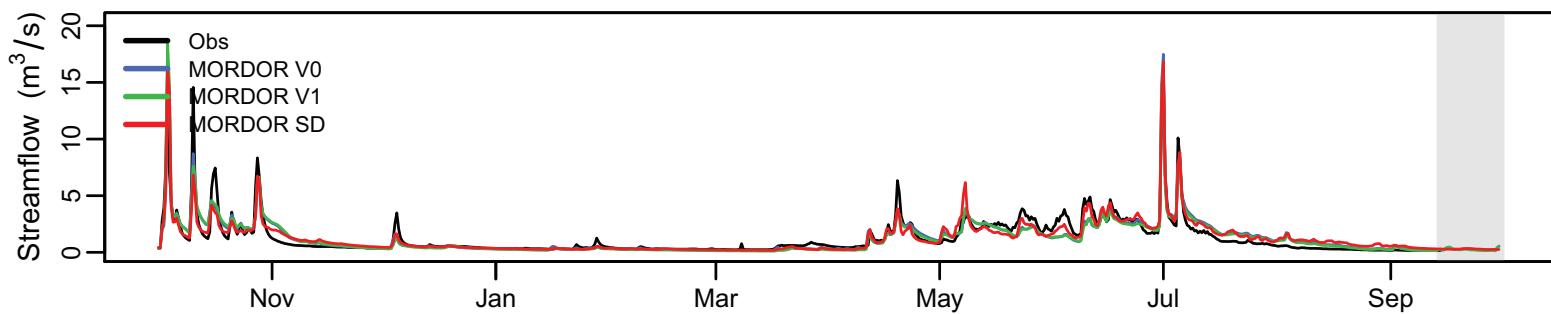

Year 1989

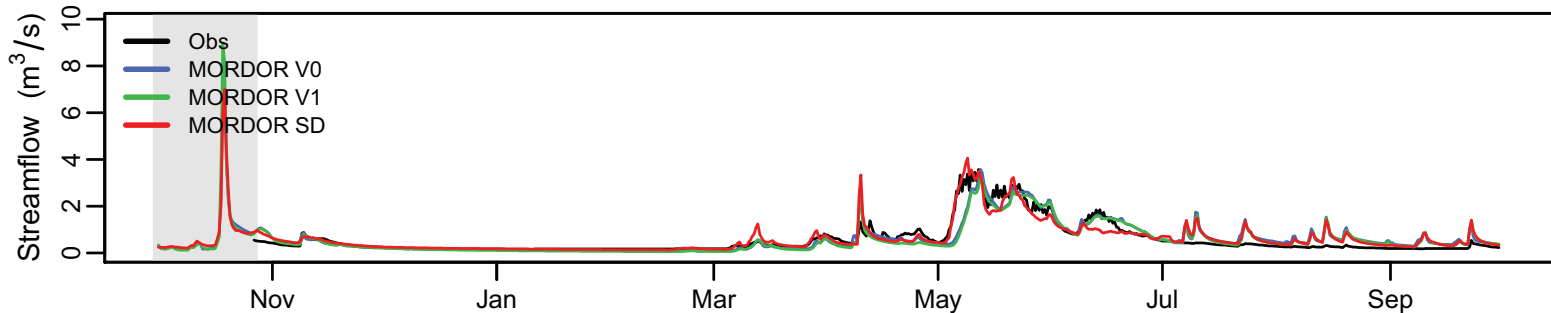

Year 1990

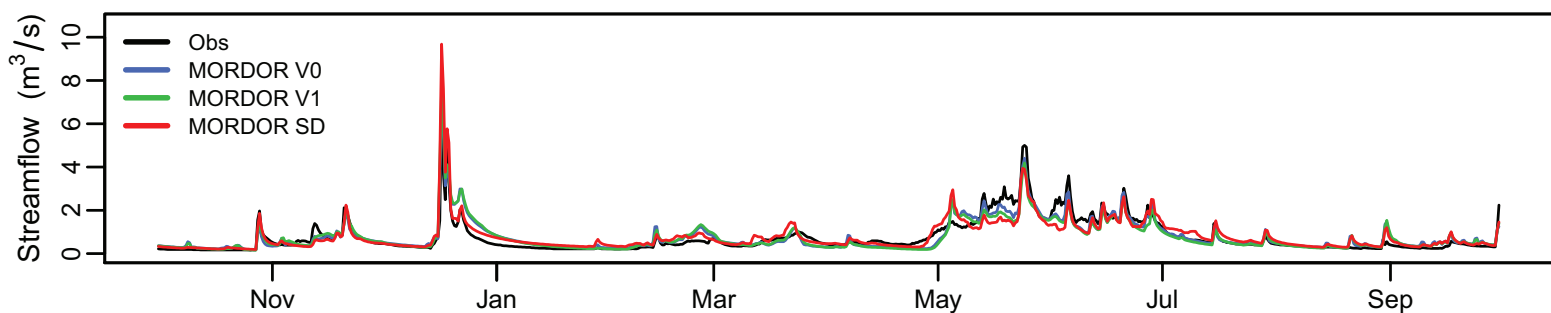

Year 1991

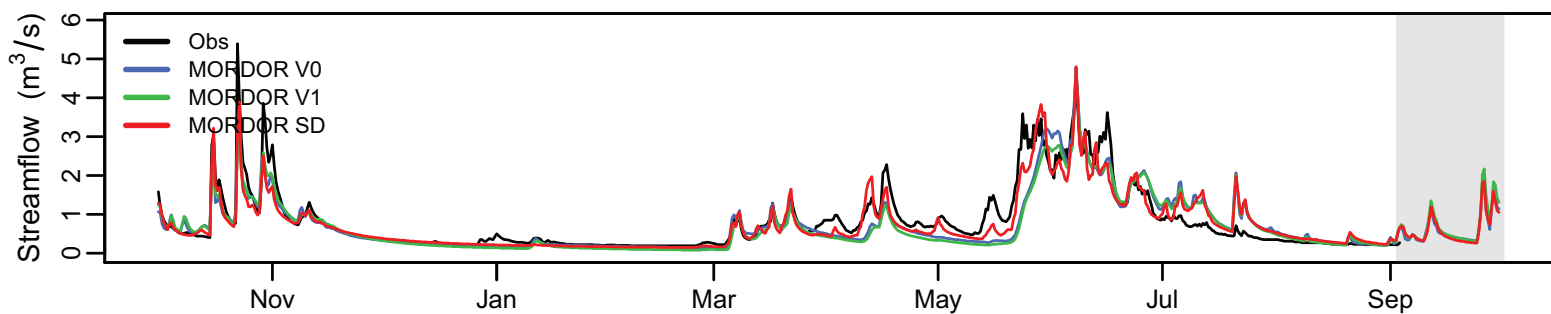

Year 1992

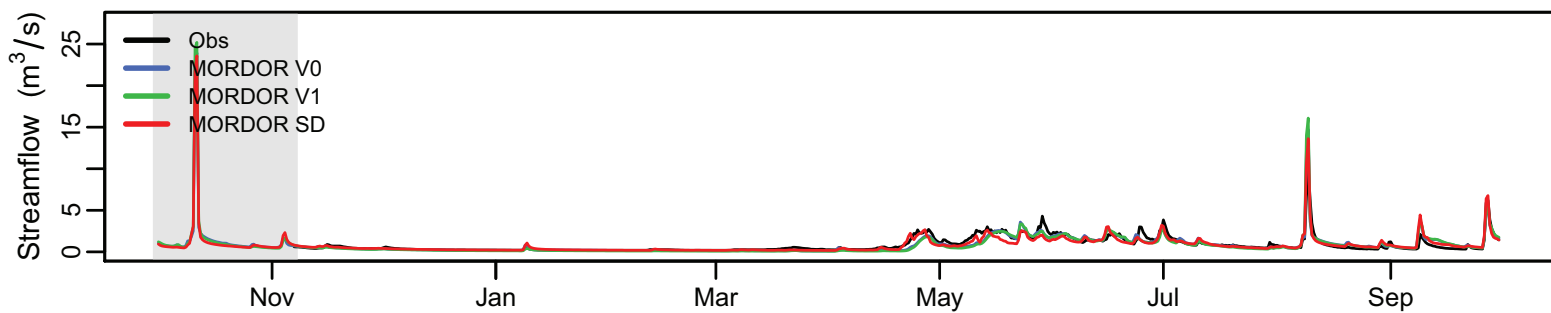

Year 1993

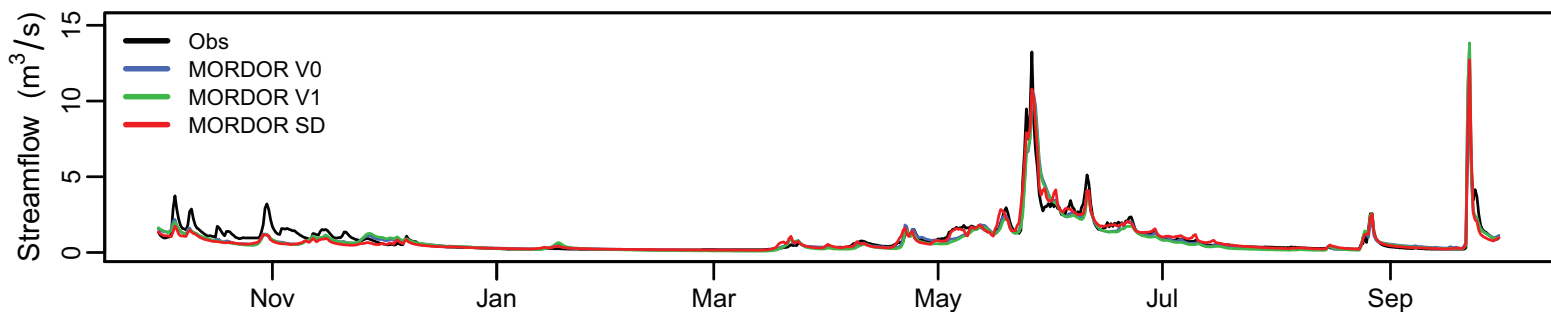

# GaveEstaubé@Gloriettes

Year 1994

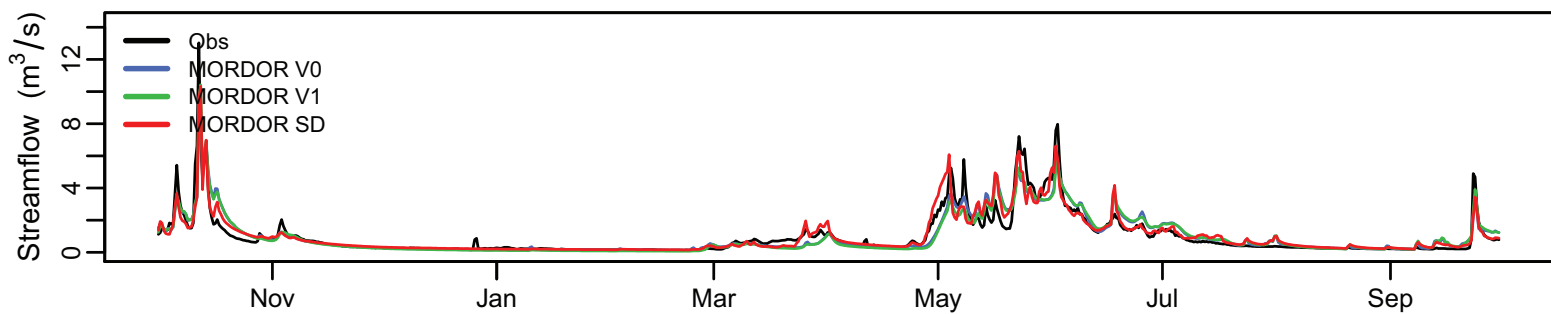

Year 1995

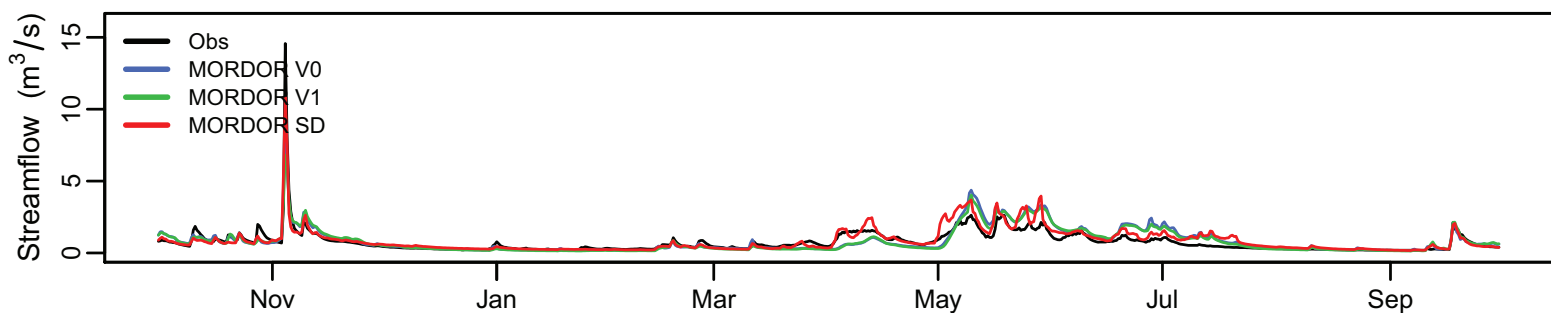

Year 1996

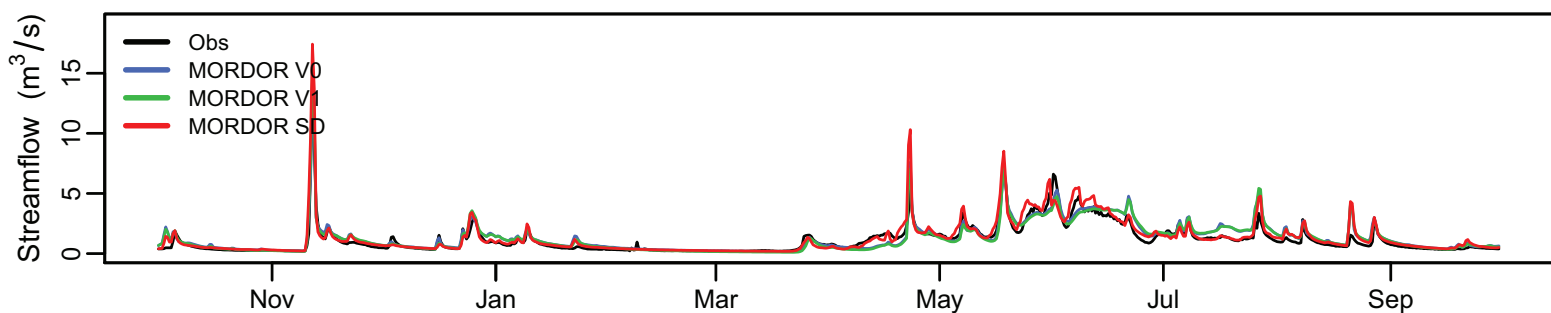

Year 1997

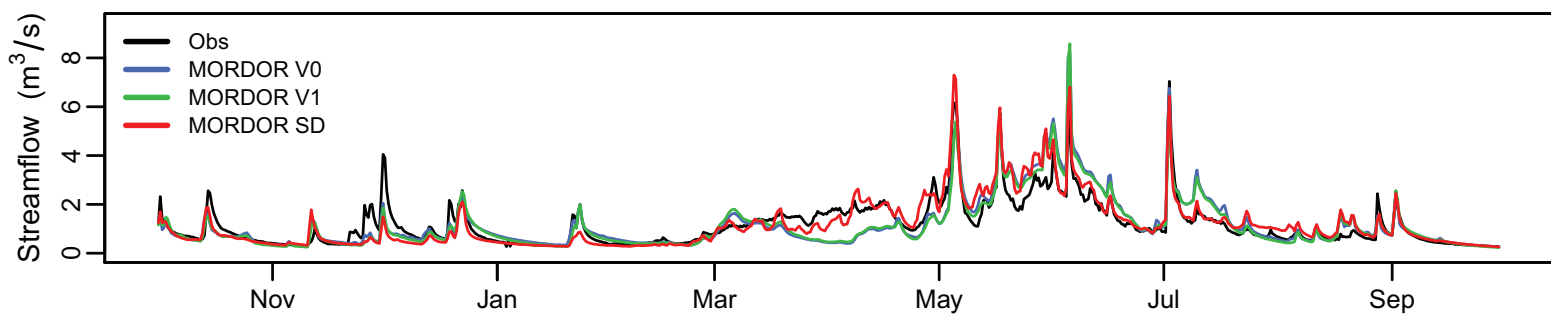

Year 1998

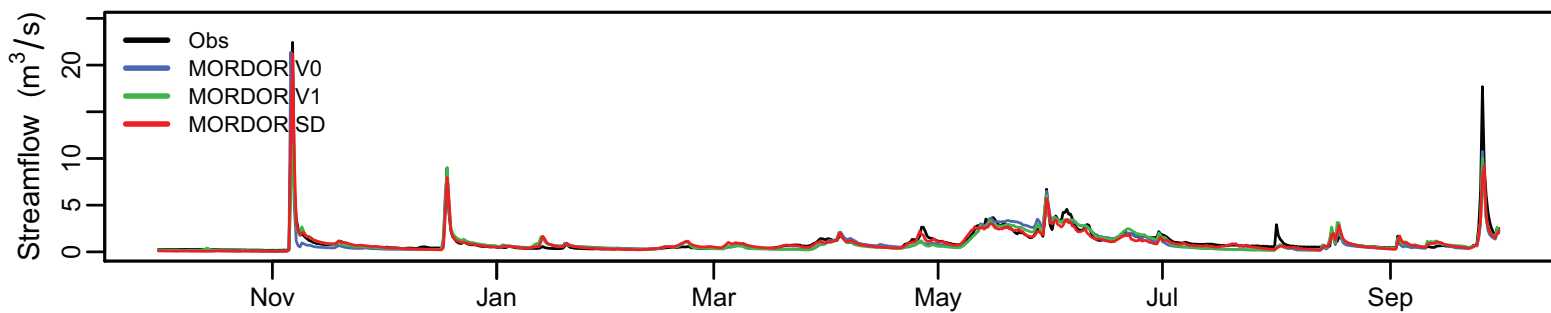

Year 1999

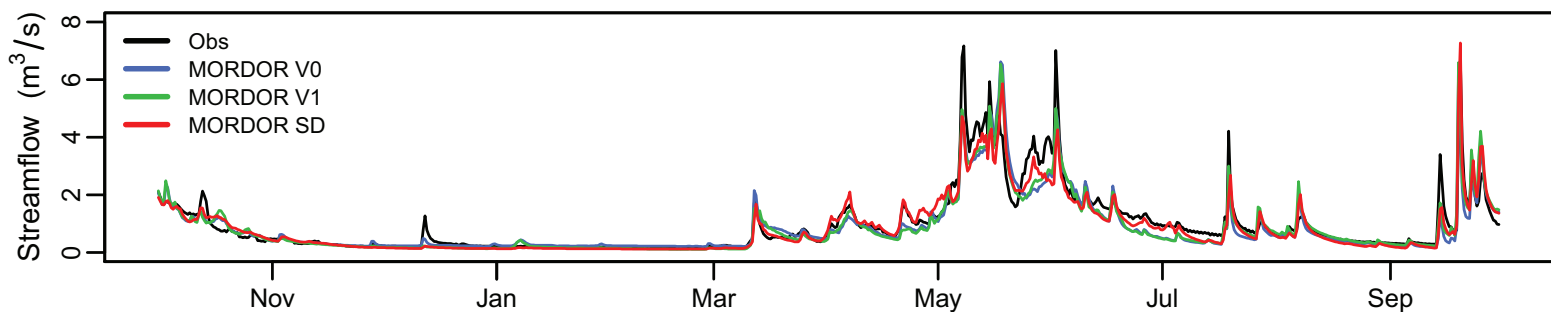



# GaveEstaubé@Gloriettes

Year 2000

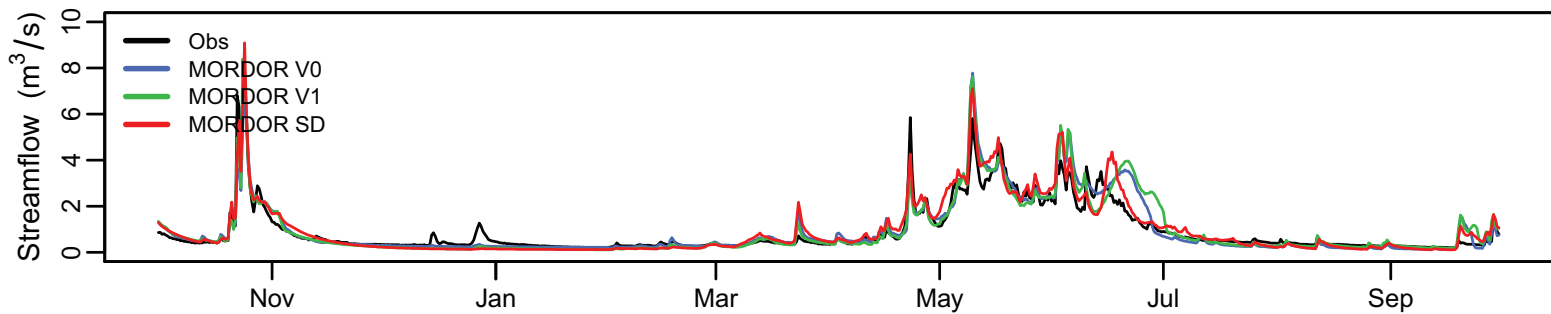

Year 2001

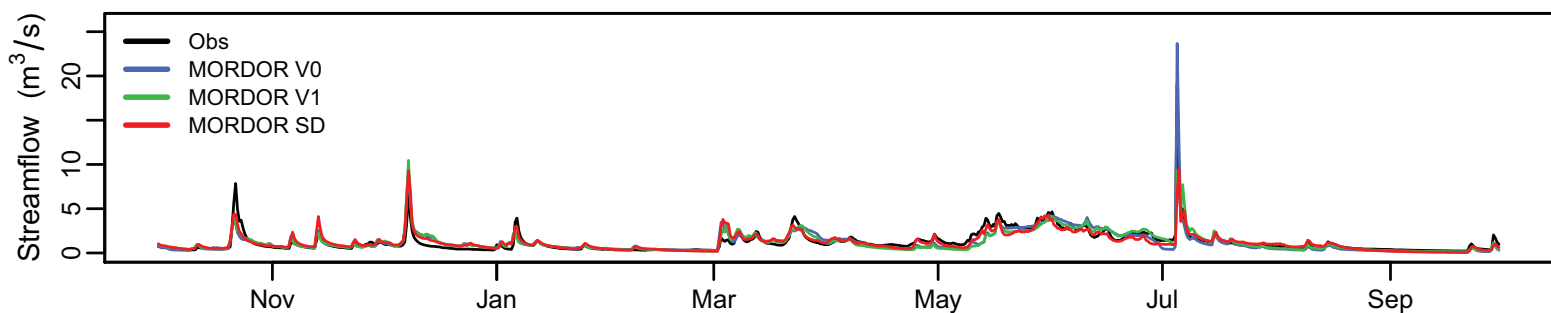

Year 2002

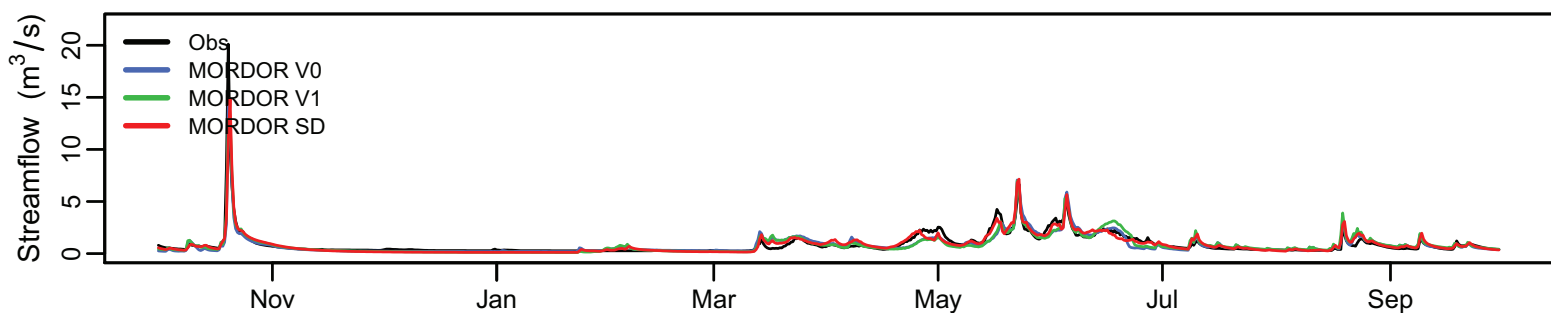

Year 2003

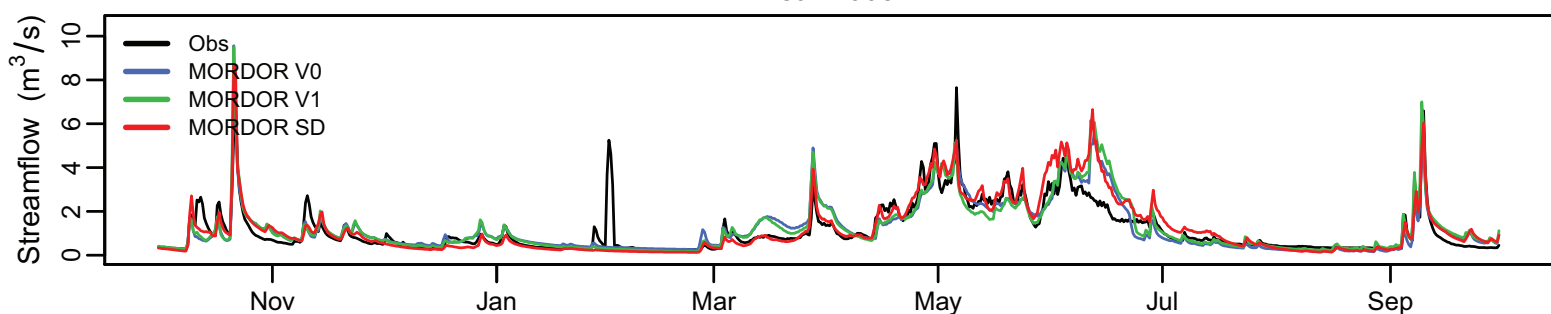

Year 2004

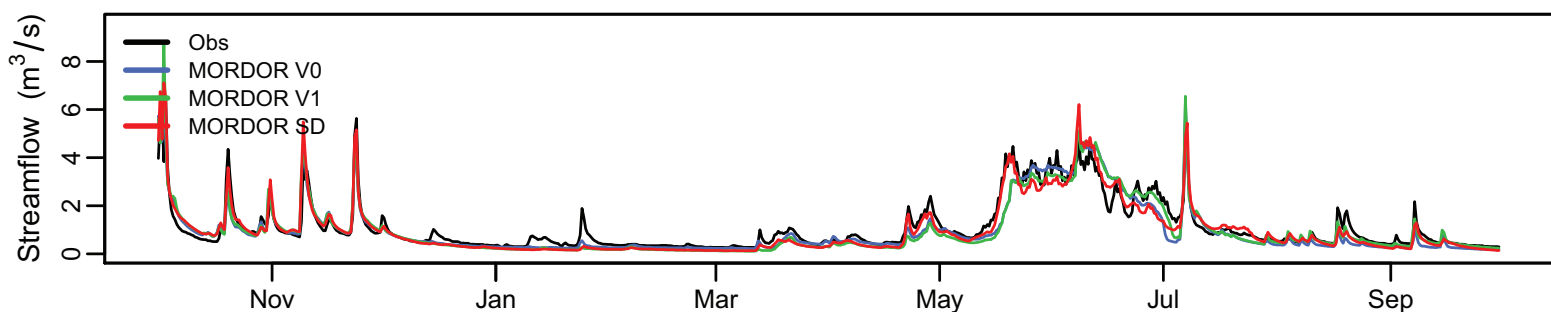

Year 2005

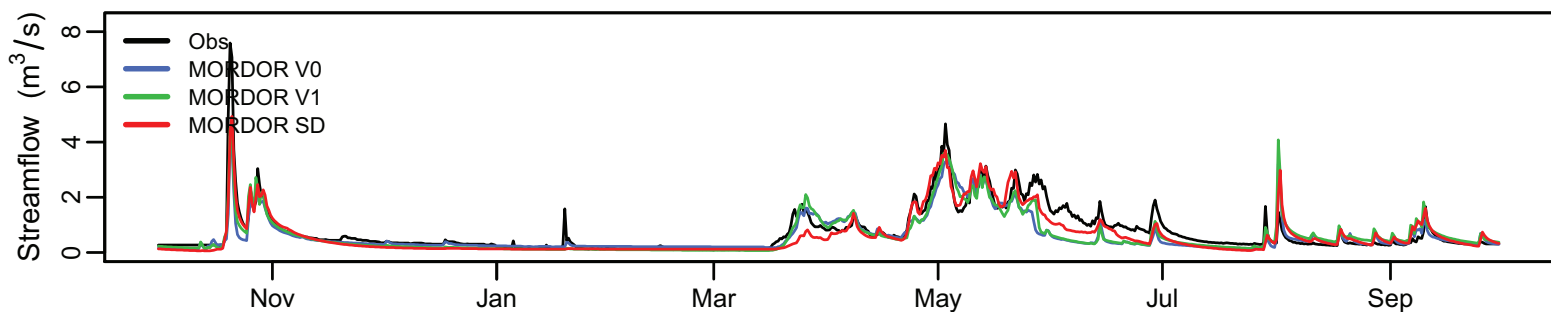

# GaveEstaubé@Gloriettes

Year 2006

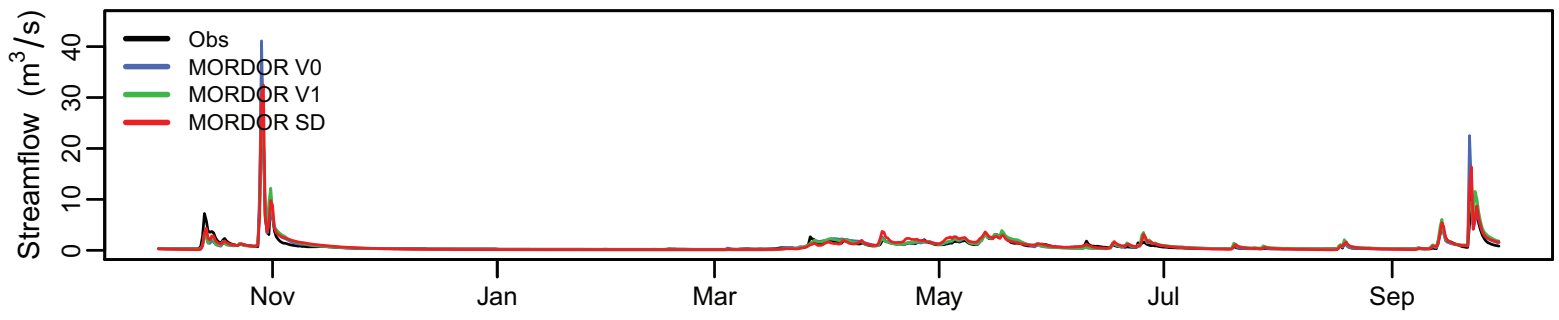

# Goussant@PontRolland

Year 1994

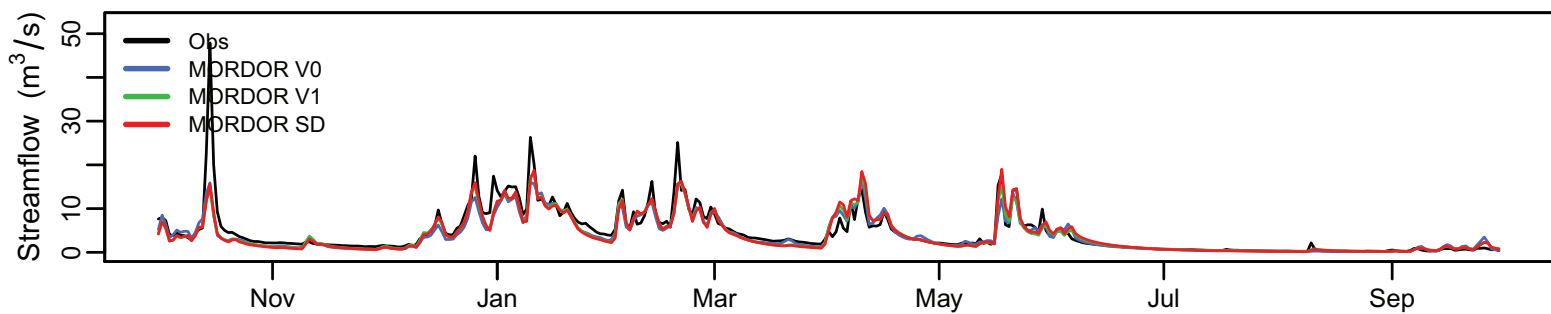

Year 1995

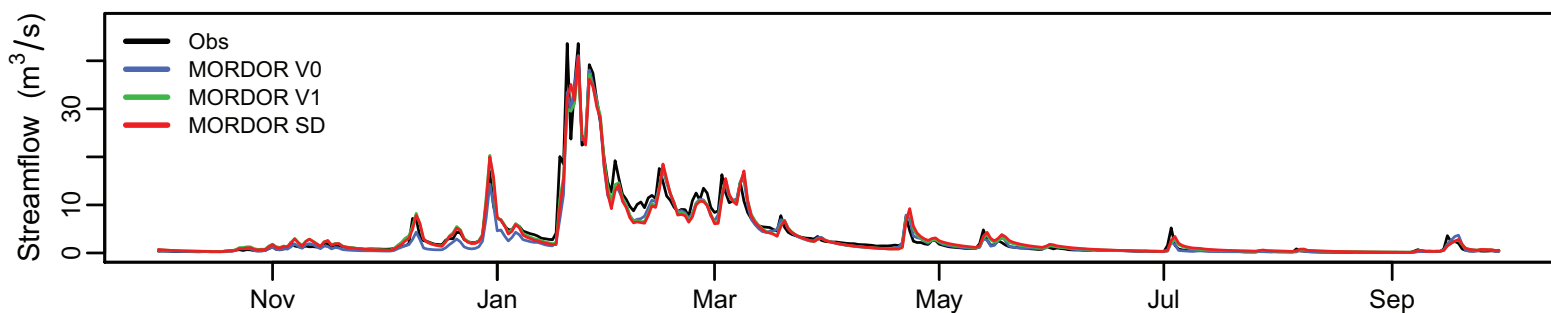

Year 1996

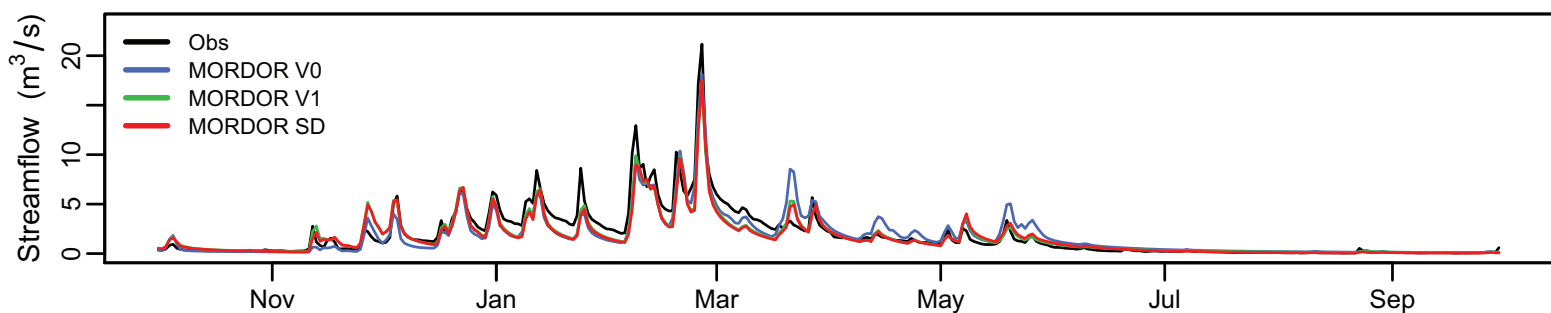

Year 1997

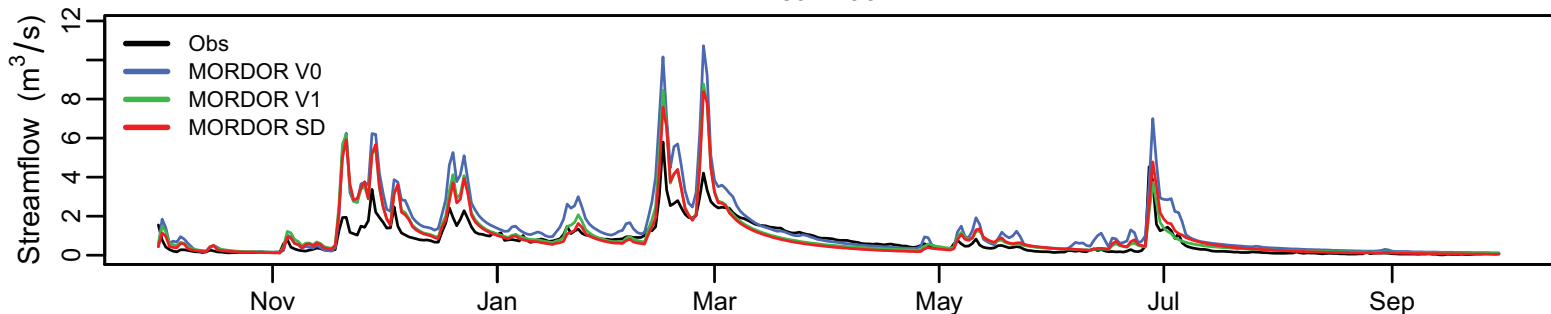

Year 1998

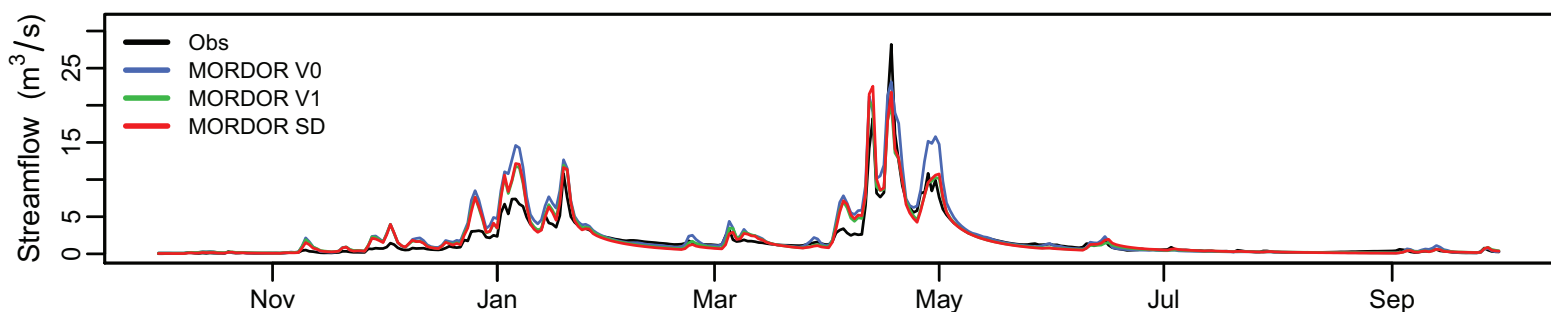

Year 1999

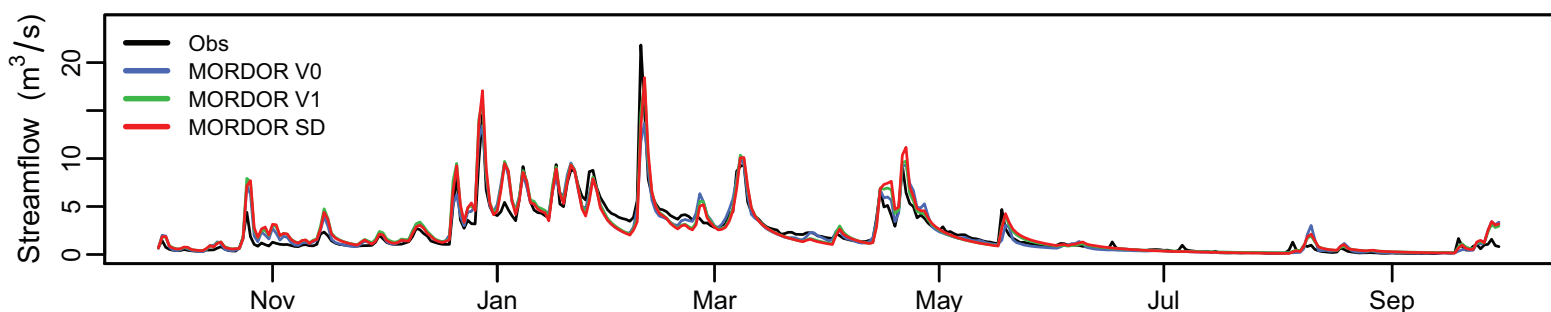

# Goussant@PontRolland

Year 2000

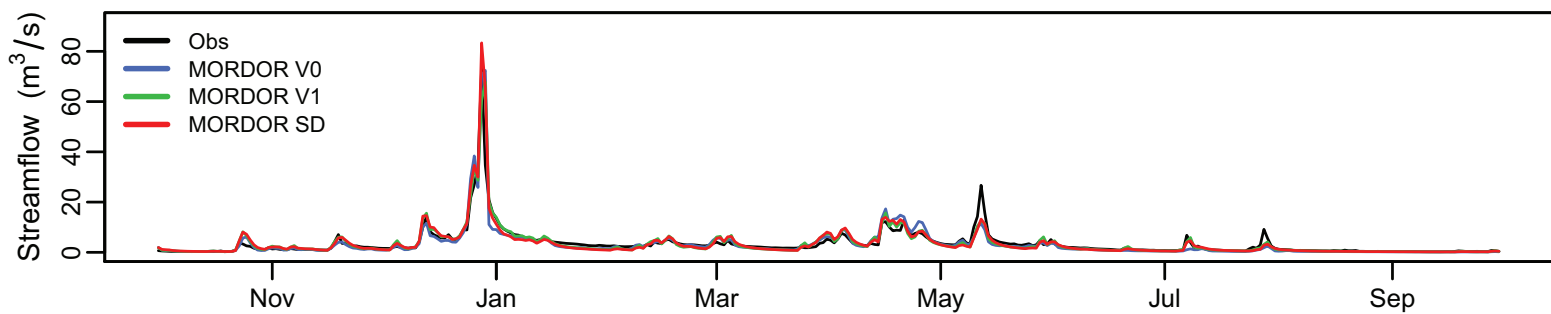

Year 2001

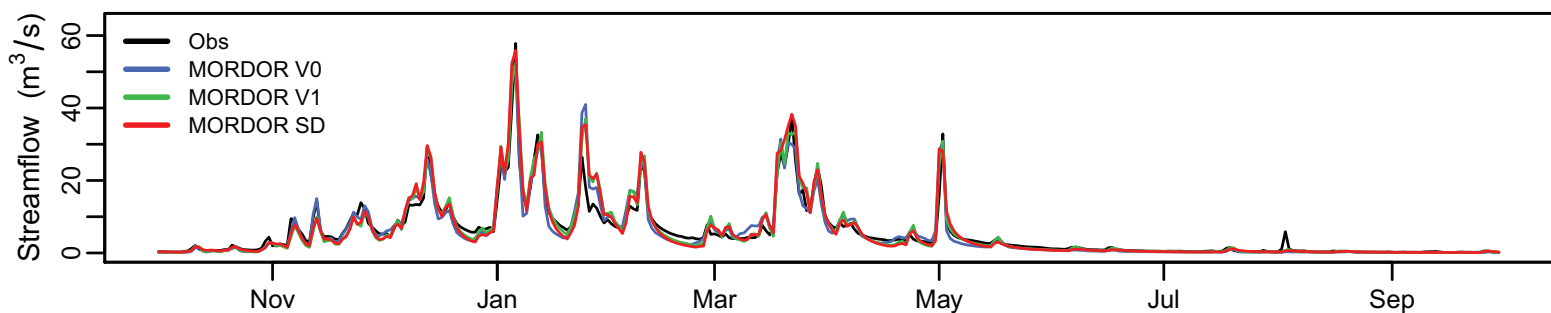

Year 2002

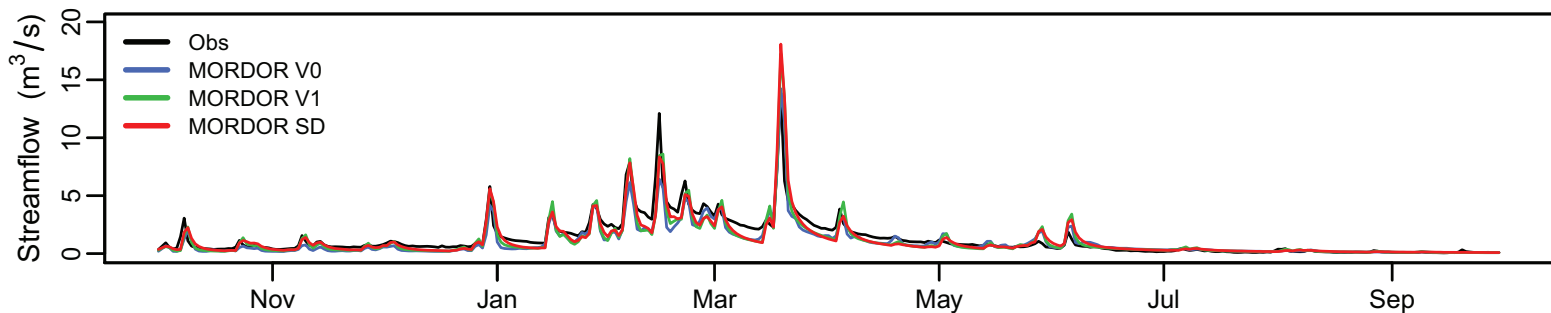

Year 2003

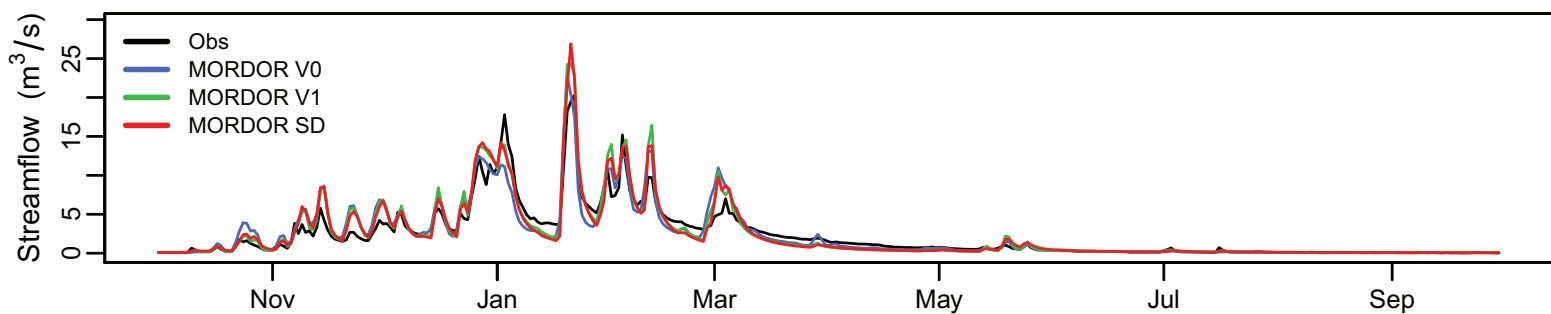

Year 2004

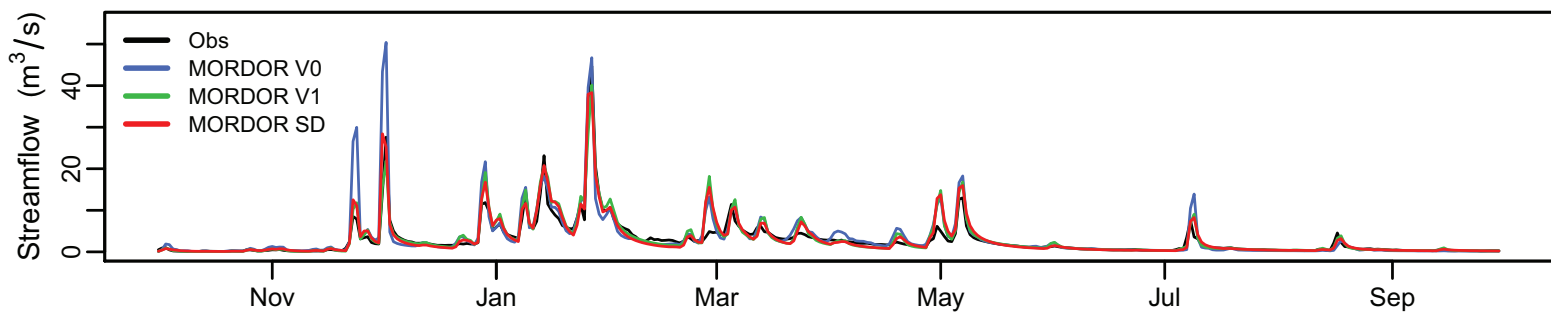

# Loire@Basset

Year 1957

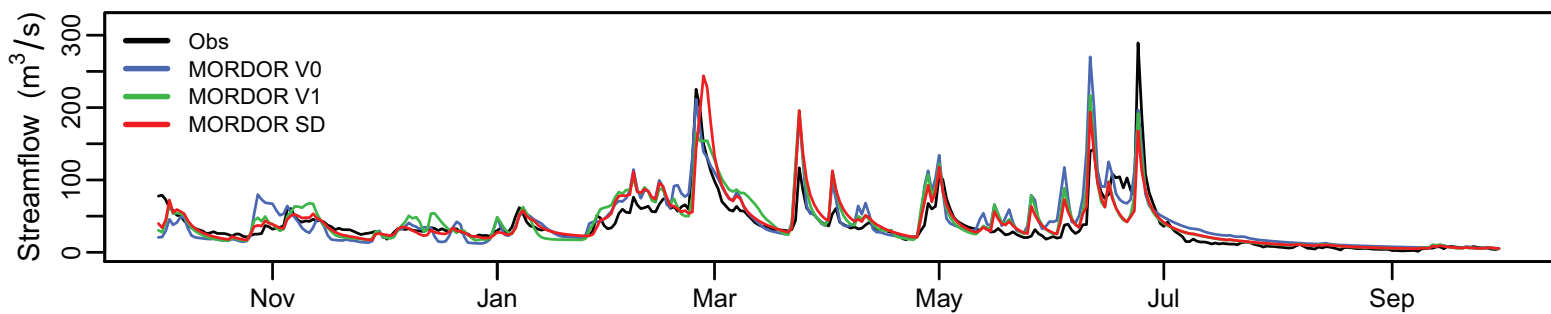

Year 1958

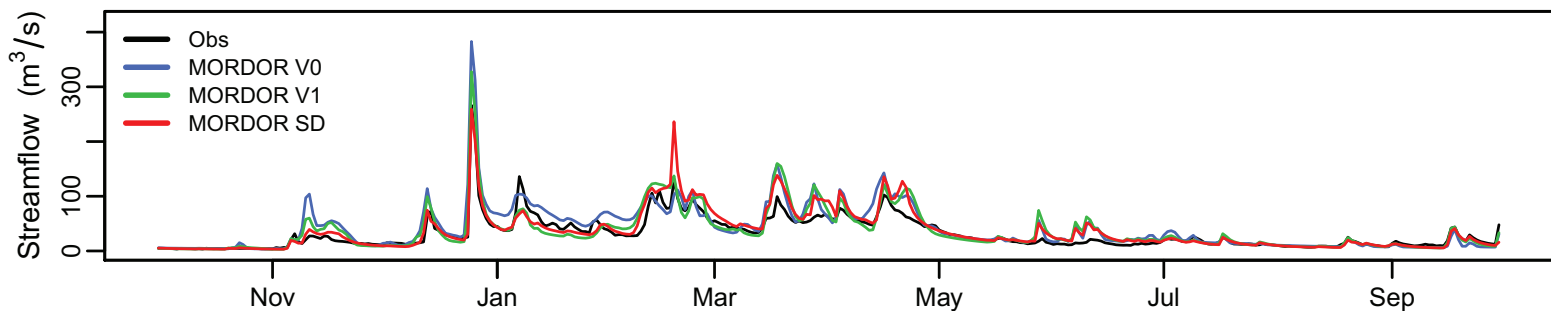

Year 1959

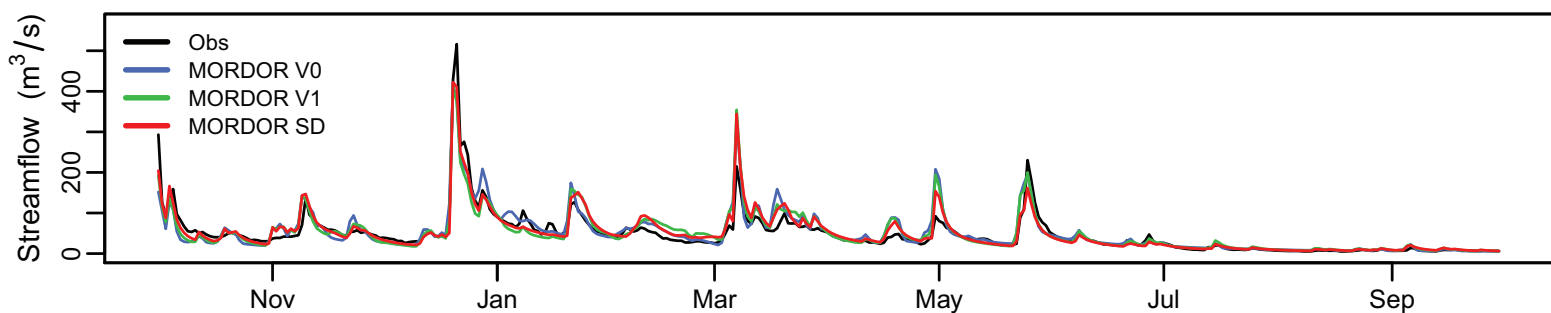

Year 1960

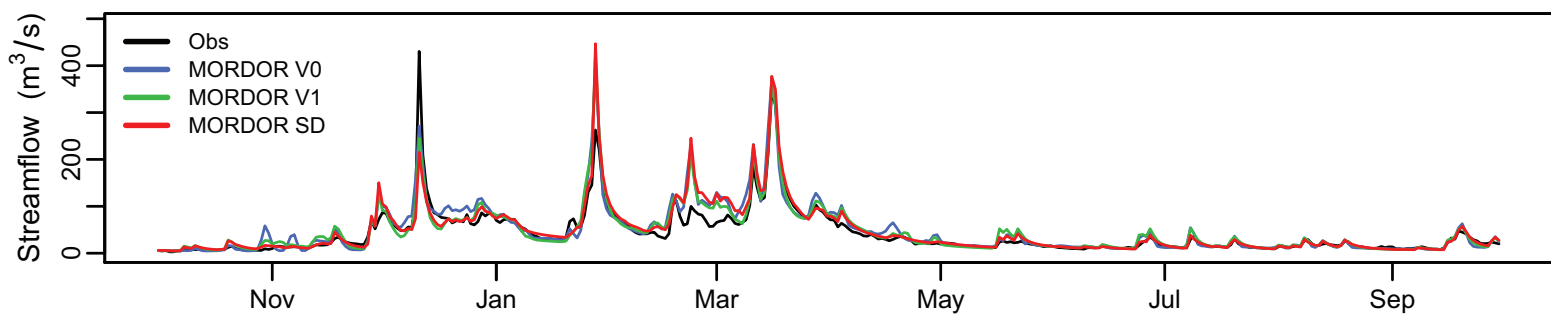

Year 1961

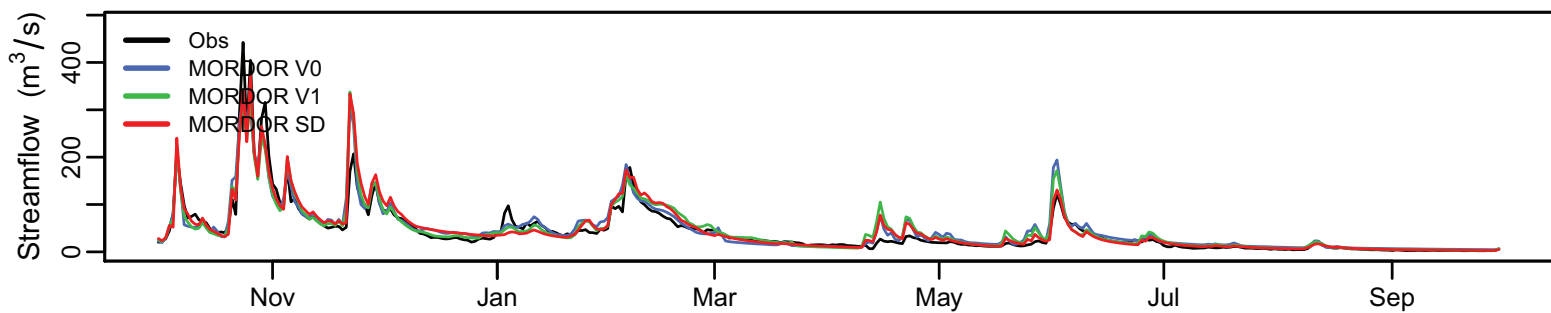

Year 1962

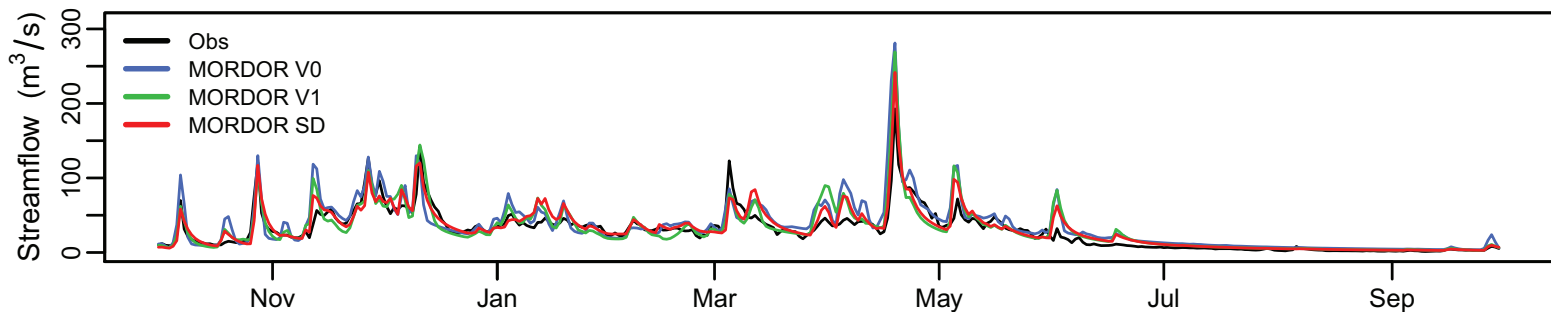

# Loire@Basset

Year 1963

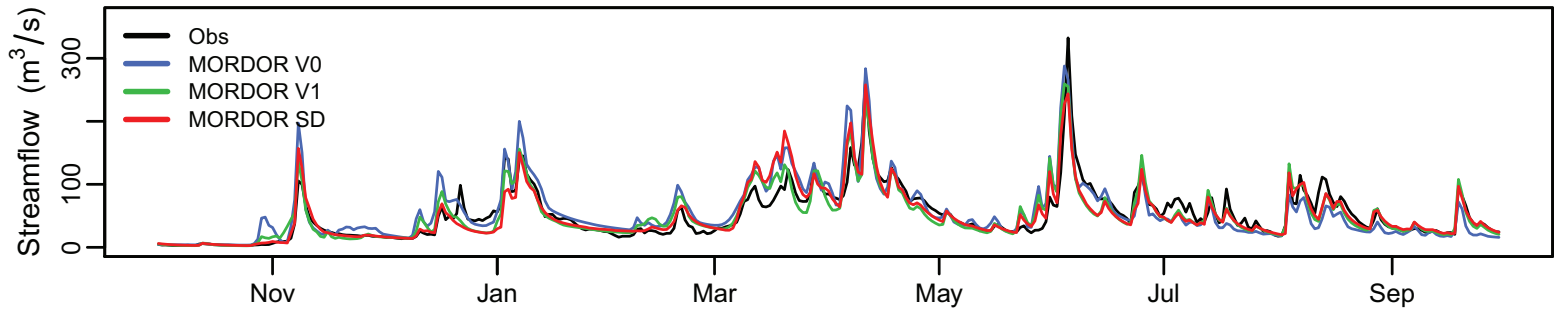

Year 1964

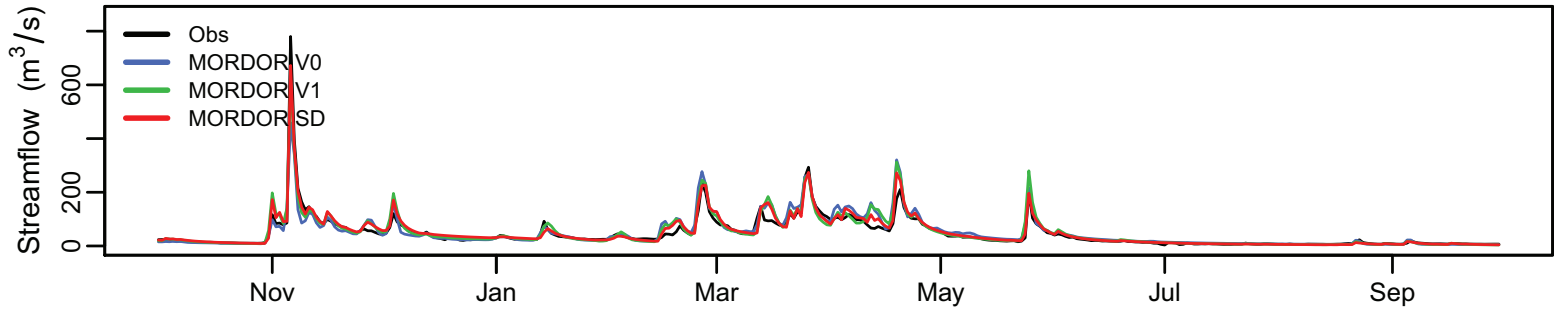

Year 1965

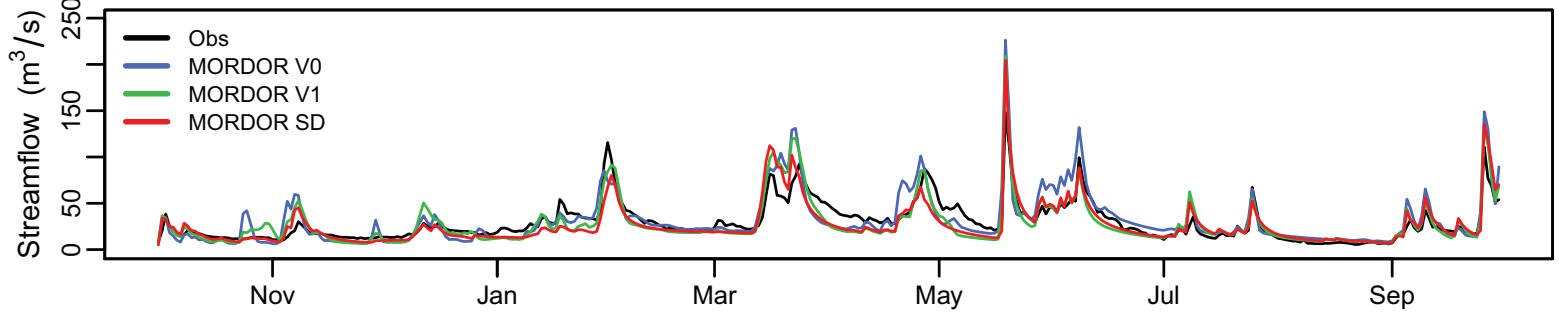

Year 1966

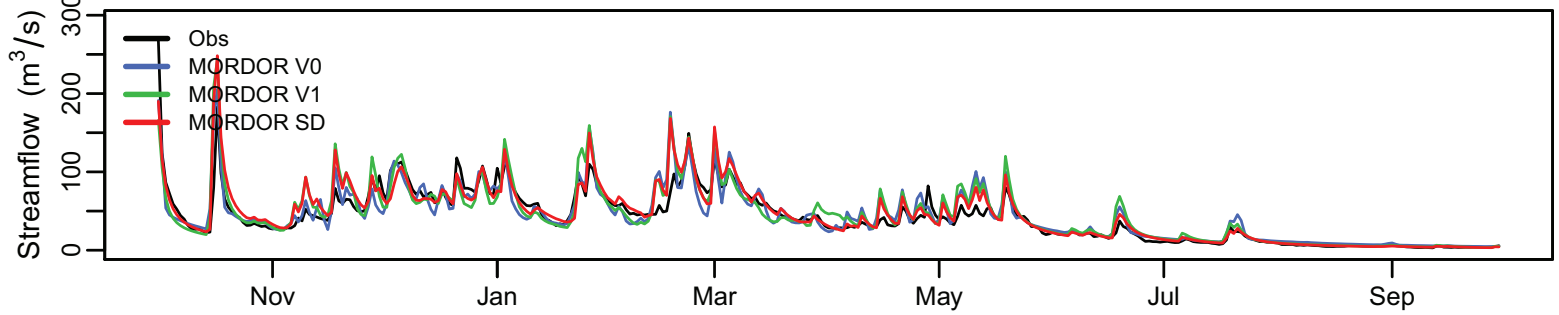

Year 1967

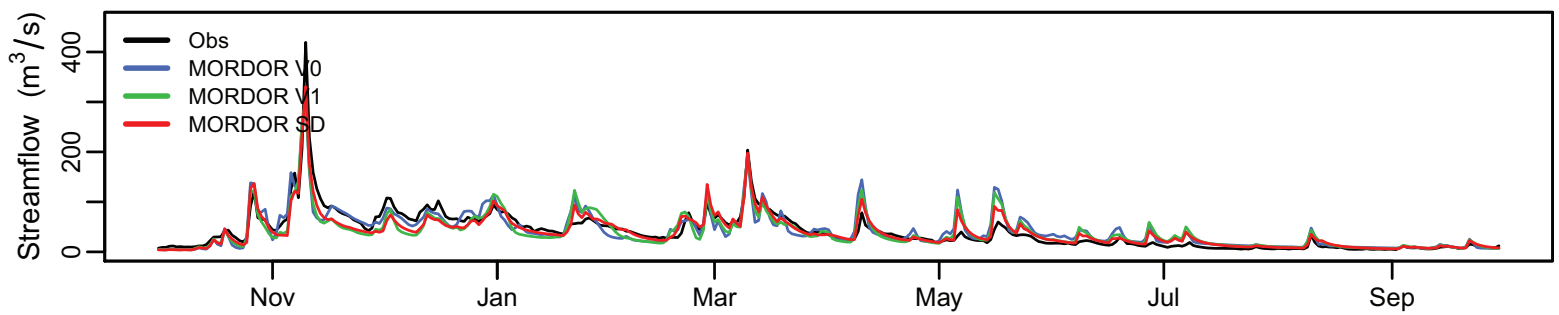

Year 1968

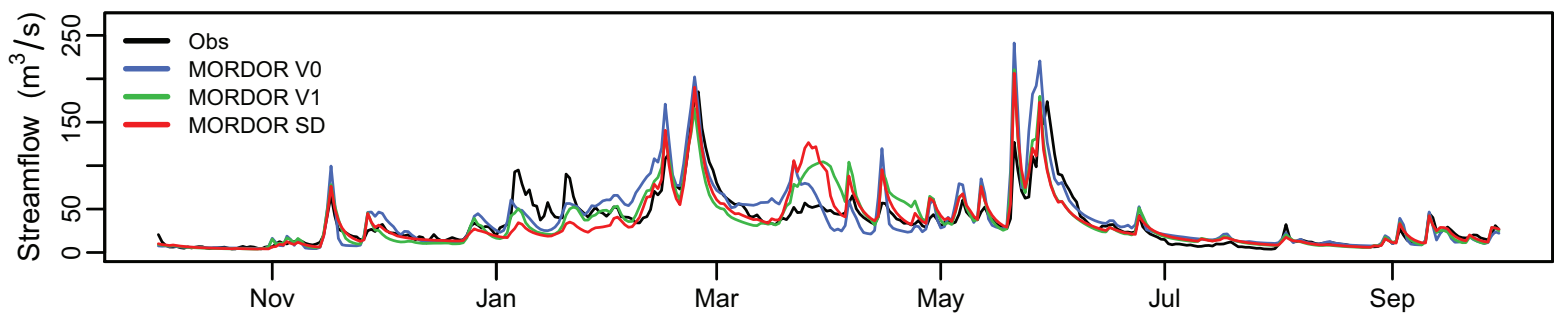

# Loire@Basset

Year 1969

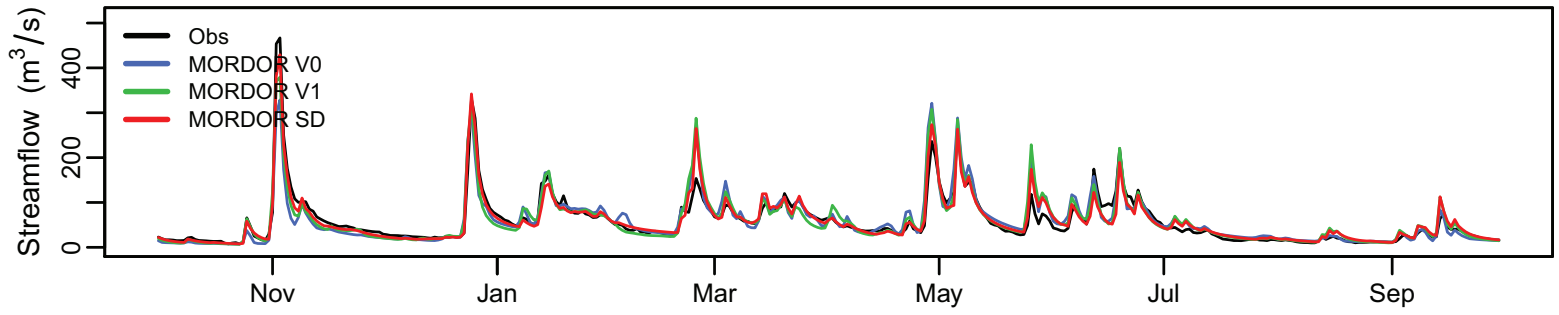

Year 1970

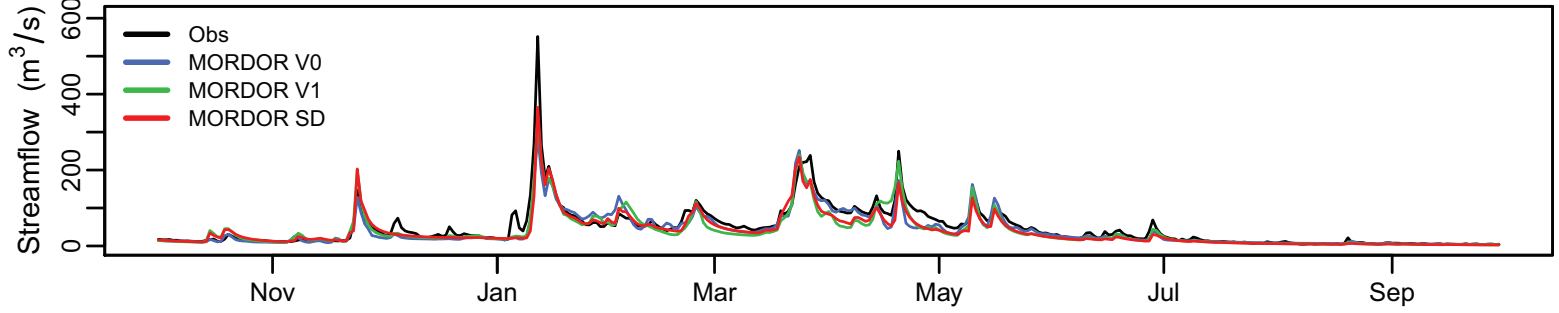

Year 1971

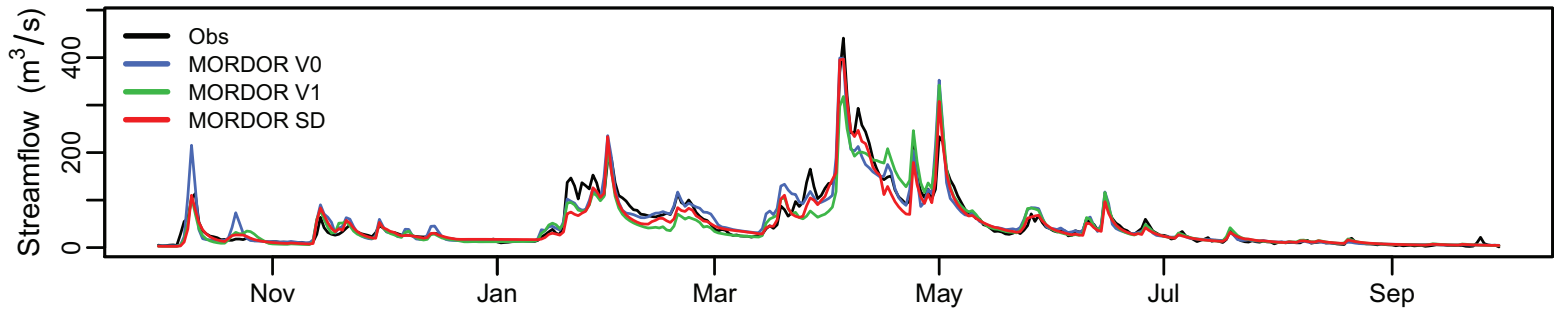

Year 1972

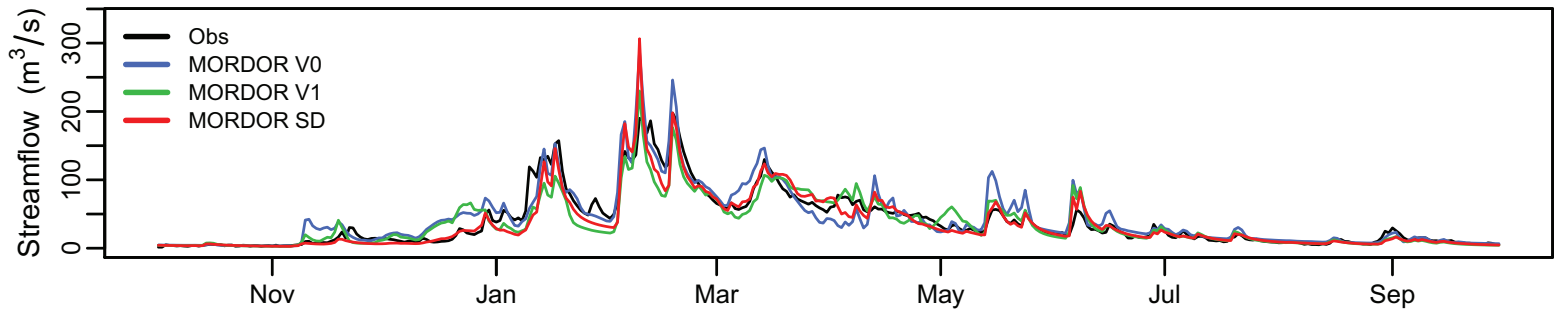

Year 1973

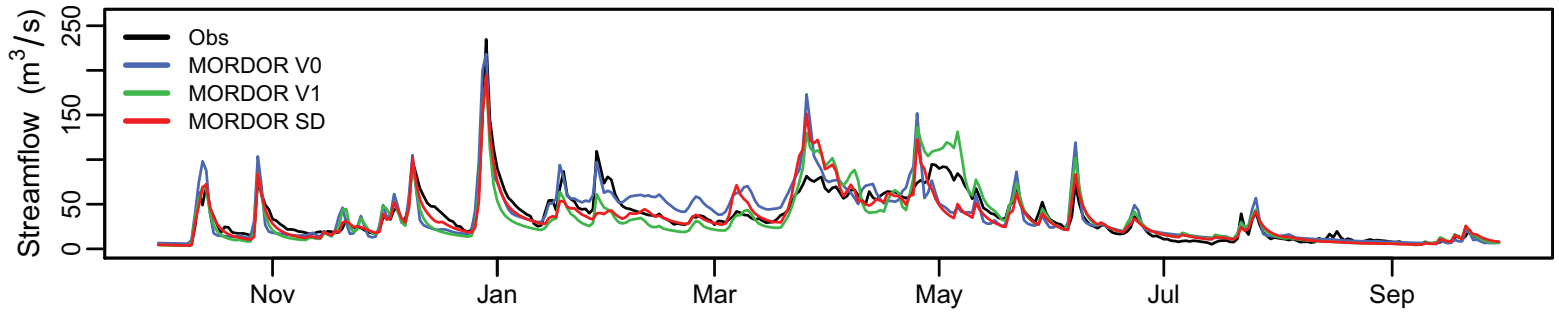

Year 1974

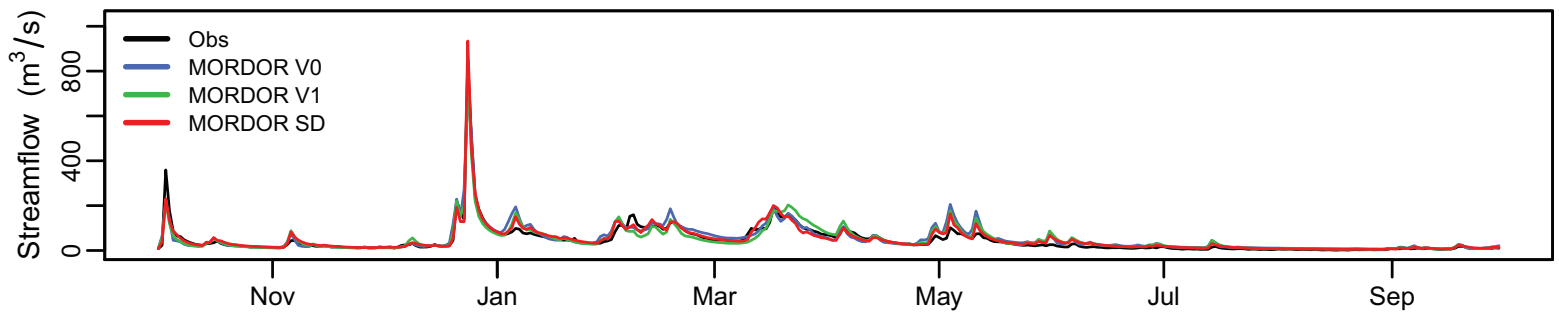

# Loire@Basset

Year 1975

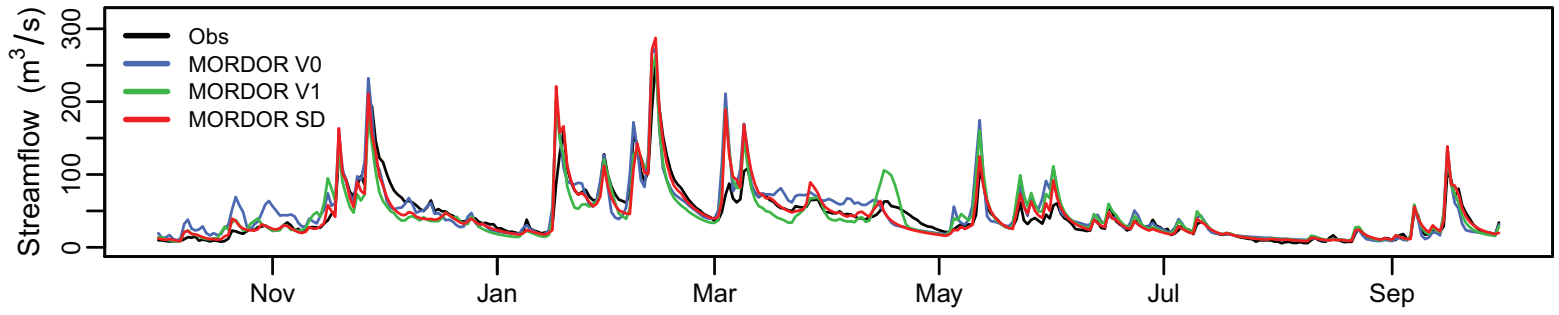

Year 1976

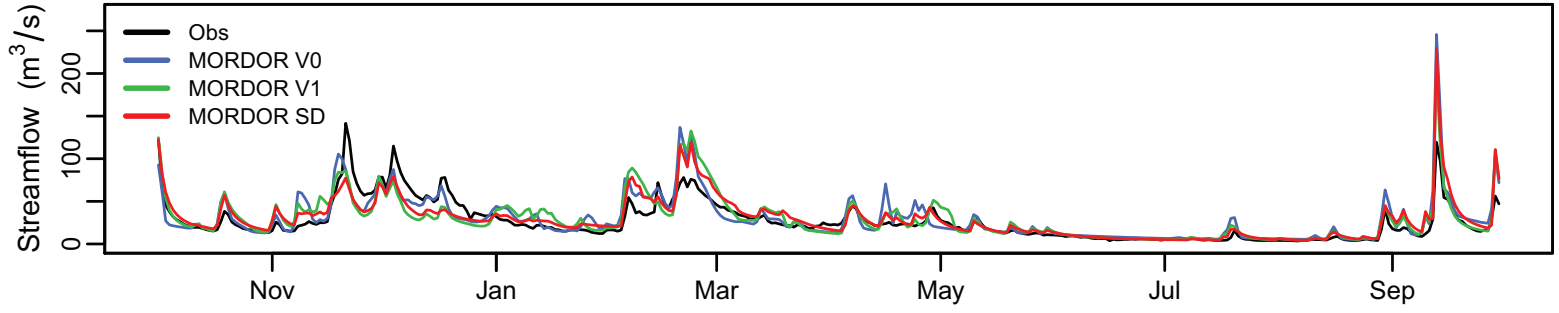

Year 1977

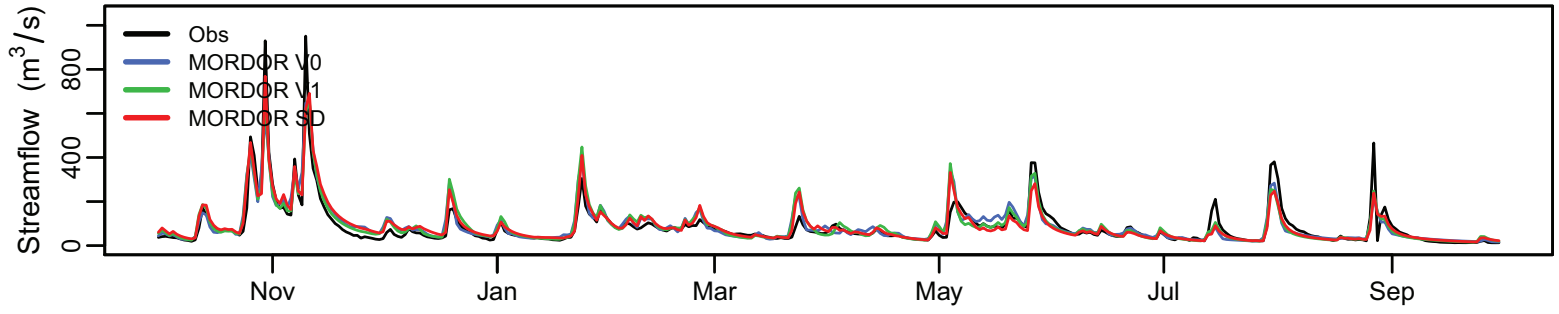

Year 1978

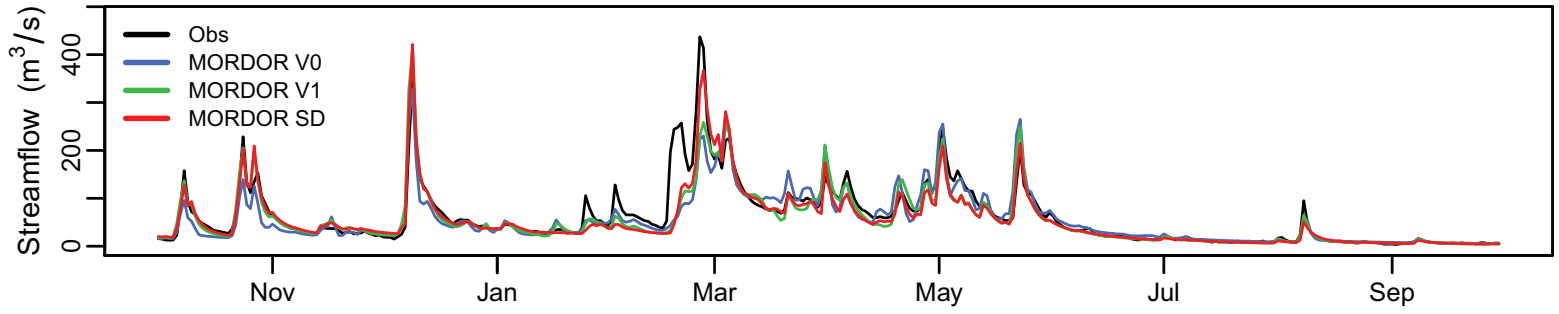

Year 1979

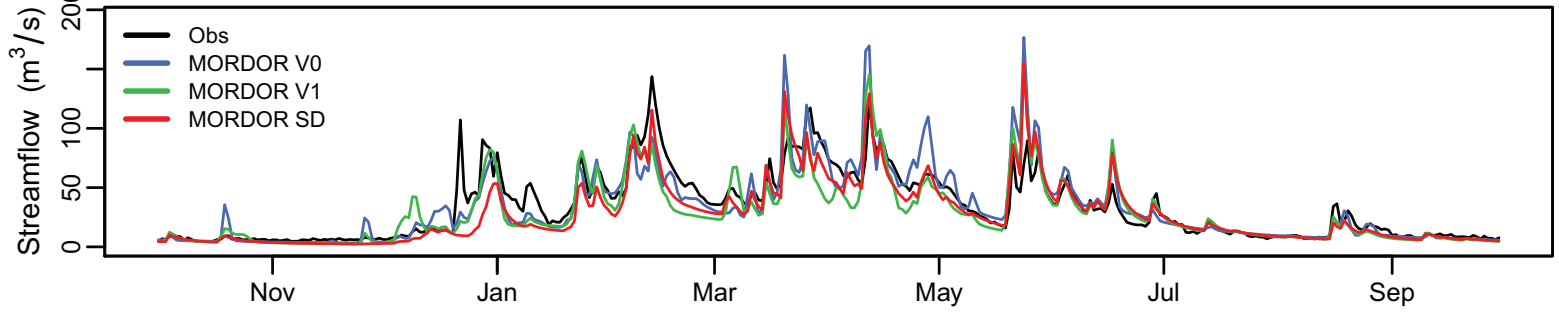

Year 1980

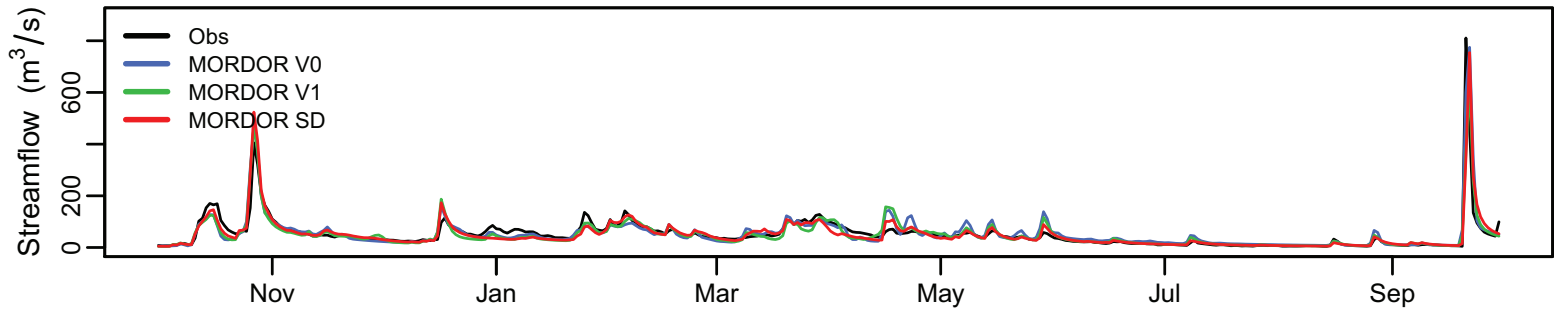



# Loire@Basset

Year 1981

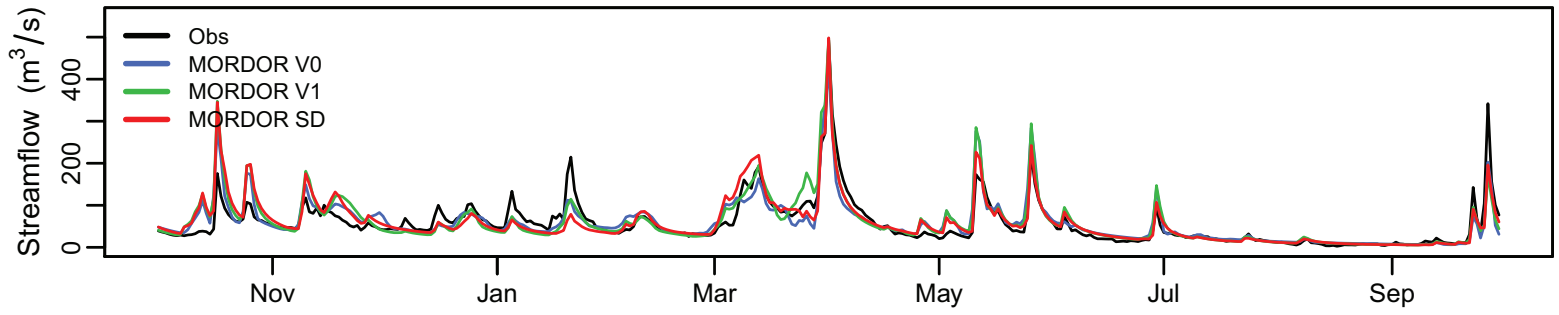

Year 1982

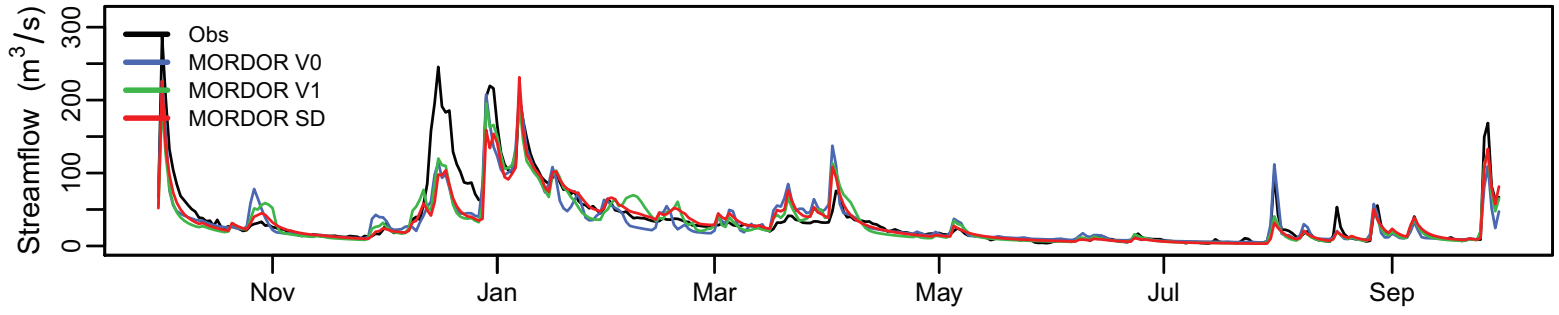

Year 1983

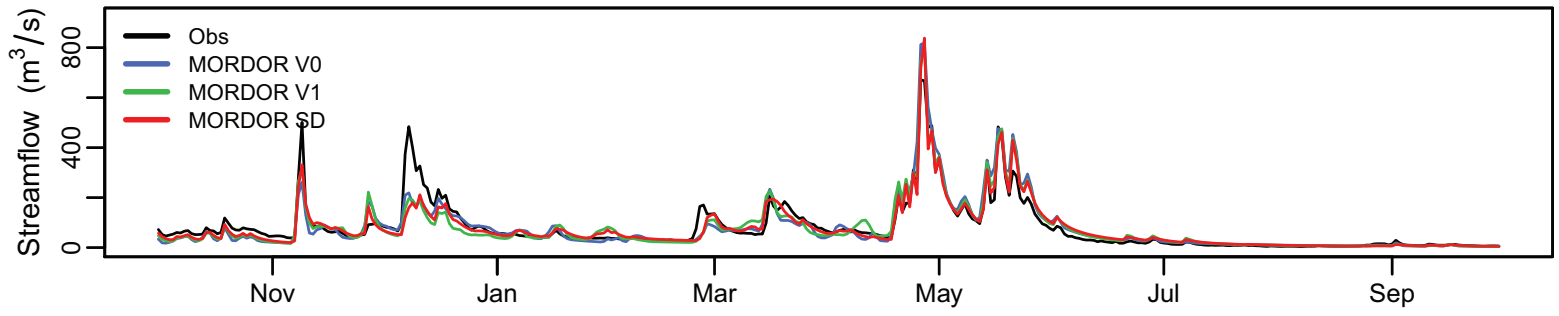

Year 1984

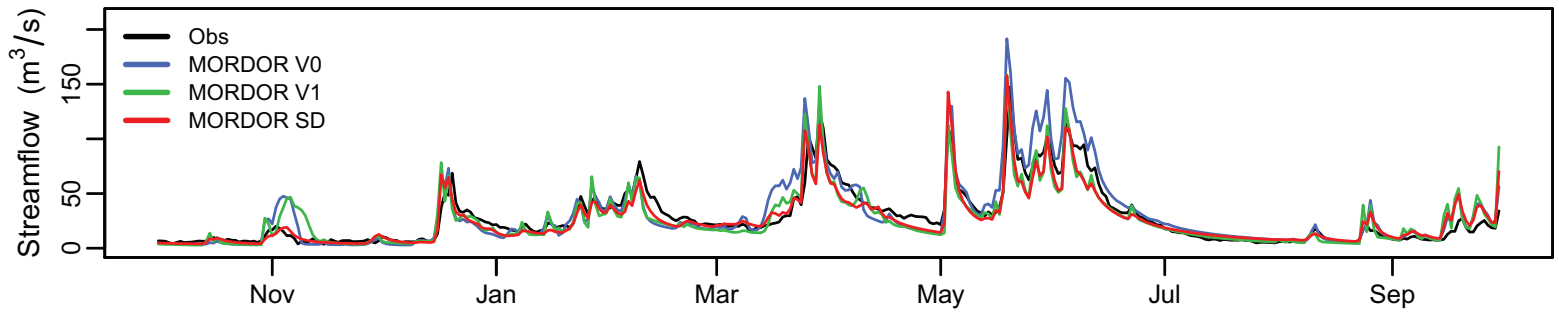

Year 1985

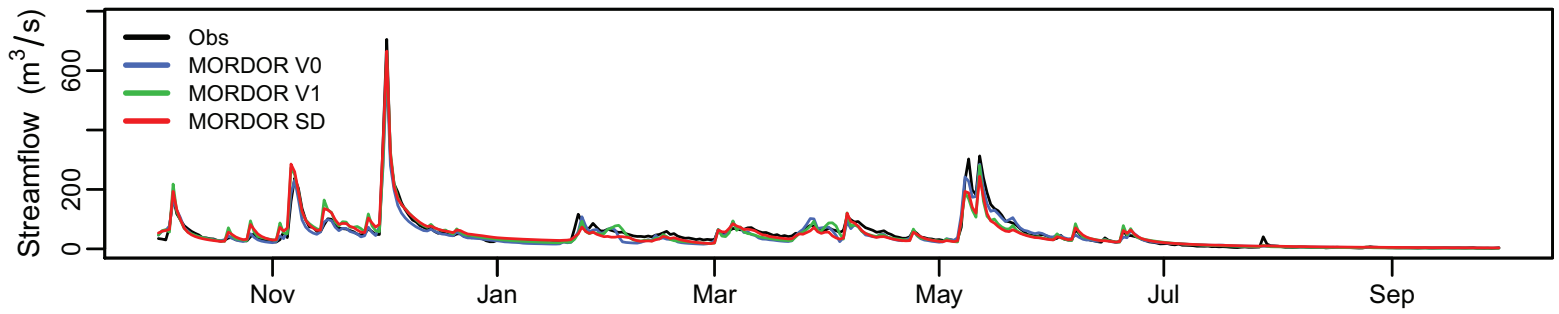

Year 1986

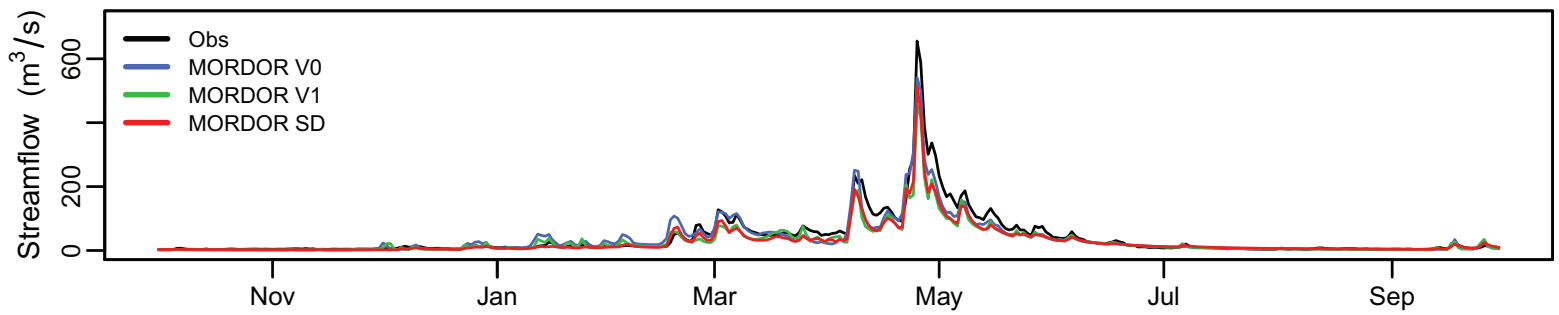

# Loire@Basset

Year 1987

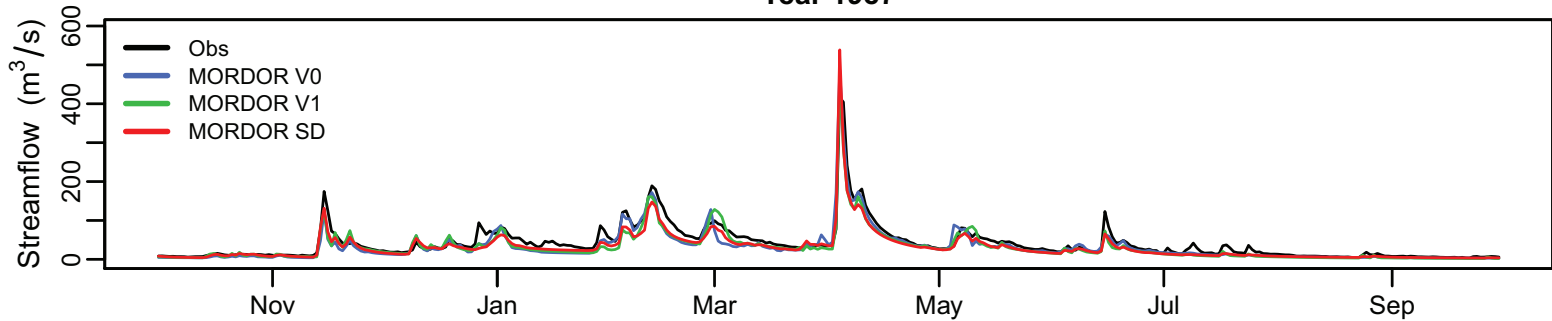

Year 1988

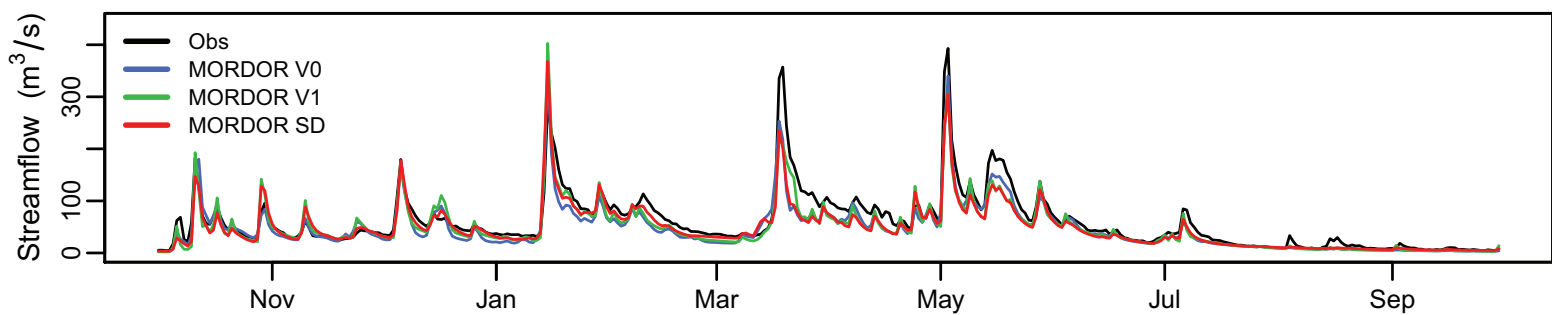

Year 1989

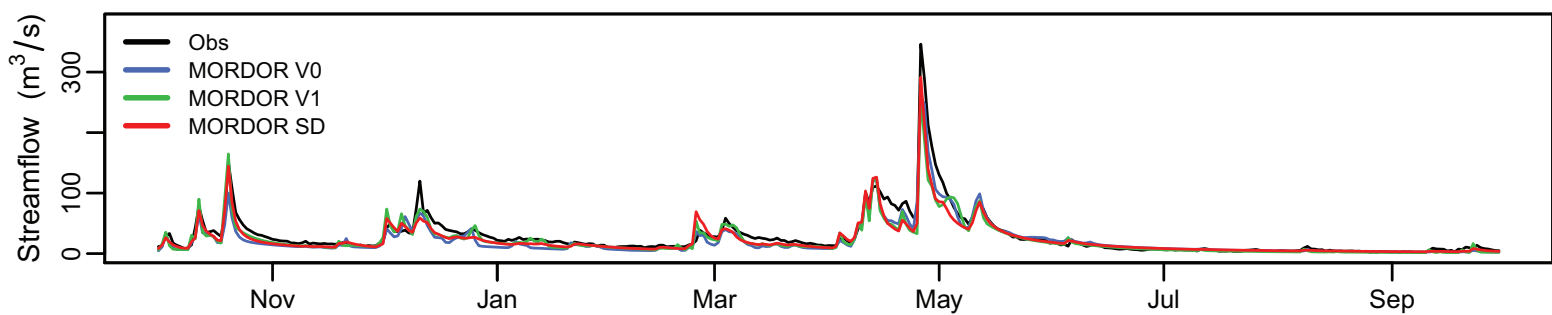

Year 1990

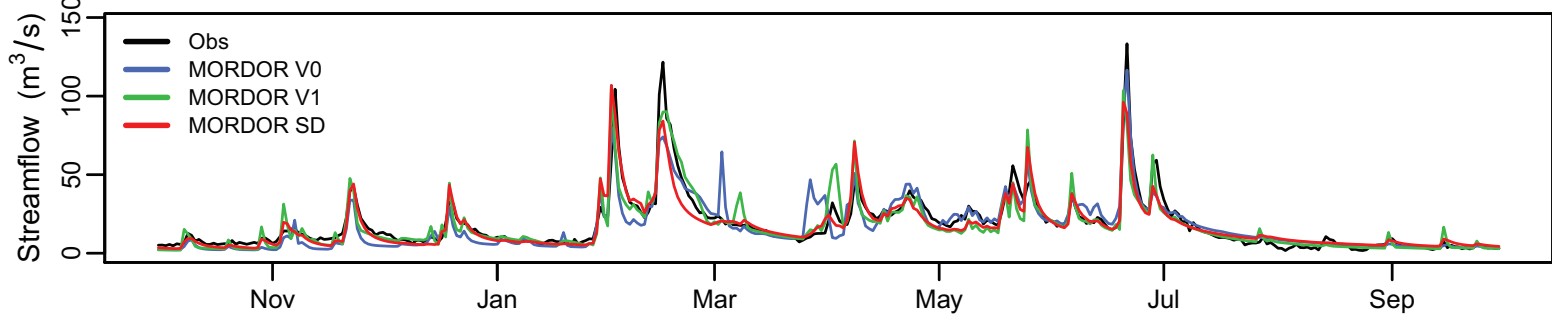

Year 1991

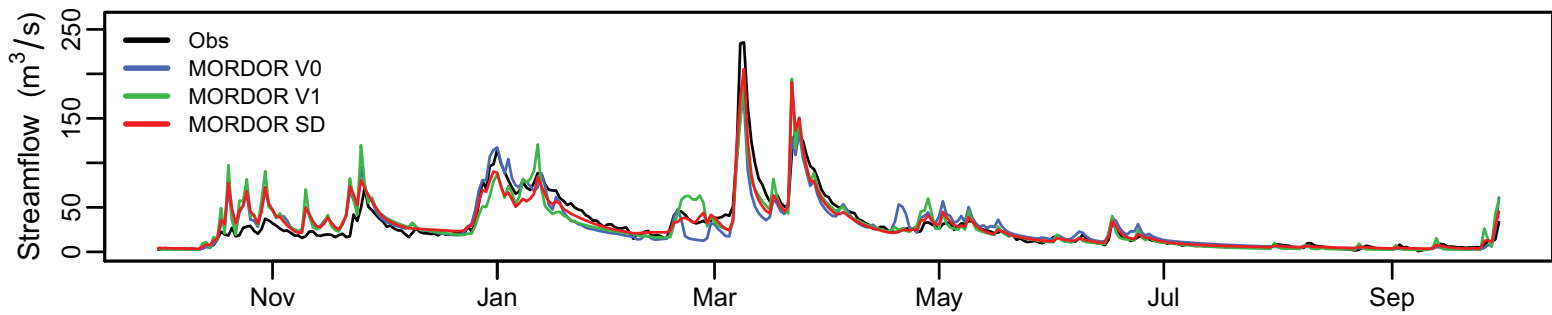

Year 1992

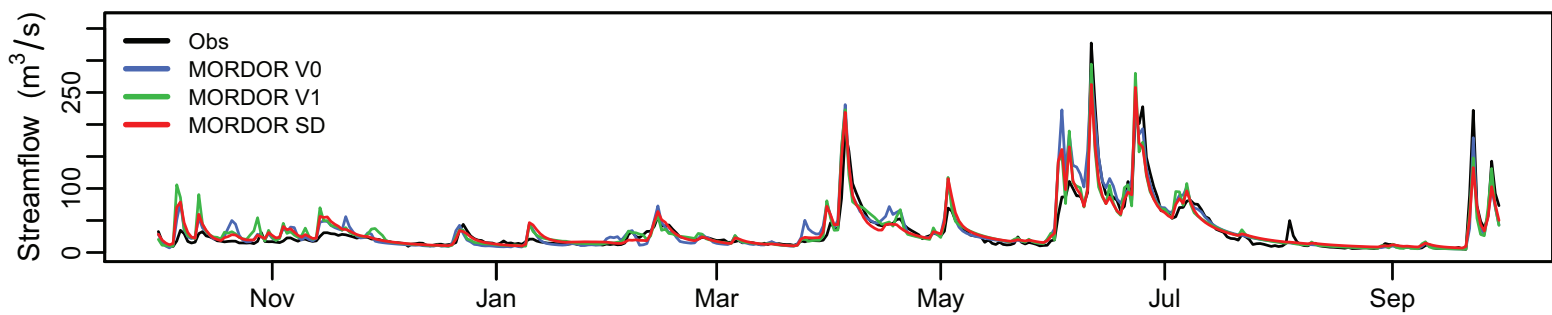

# Loire@Basset

Year 1993

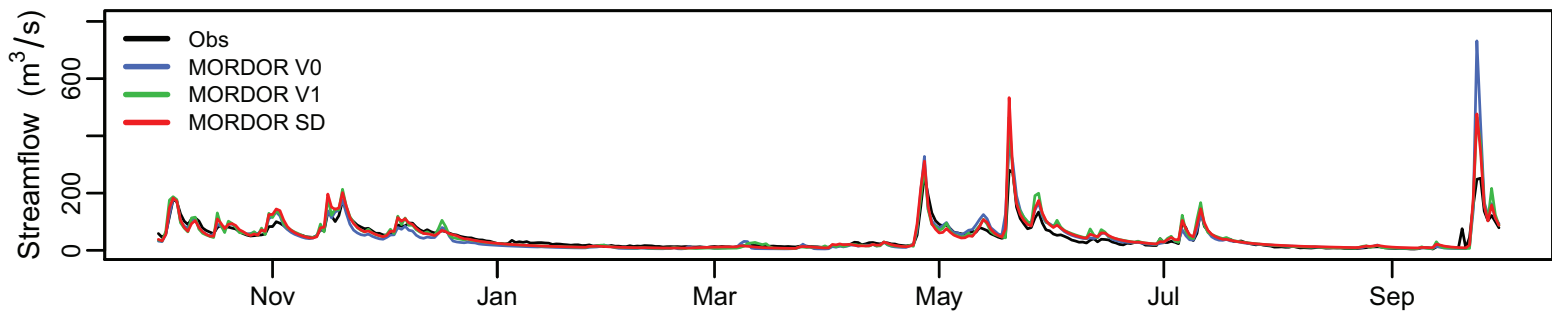

Year 1994

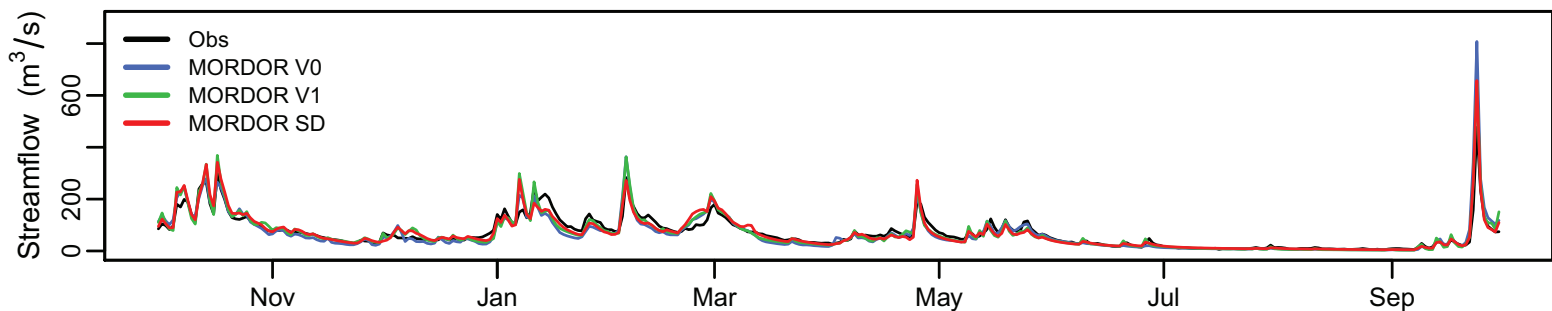

Year 1995

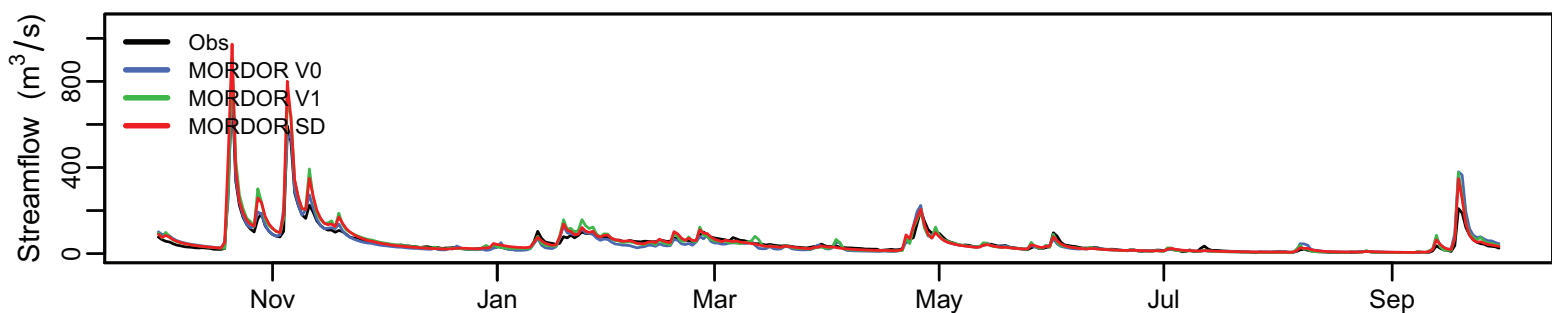

Year 1996

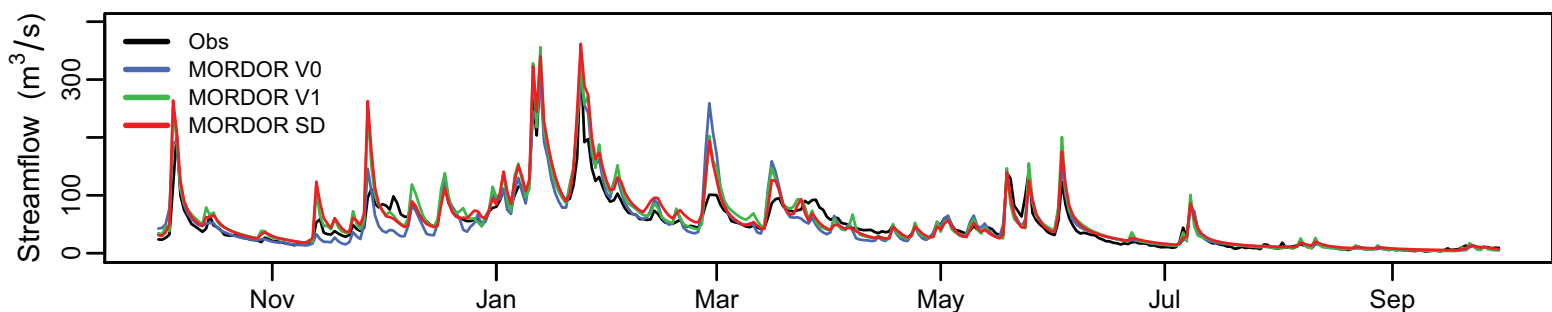

Year 1997

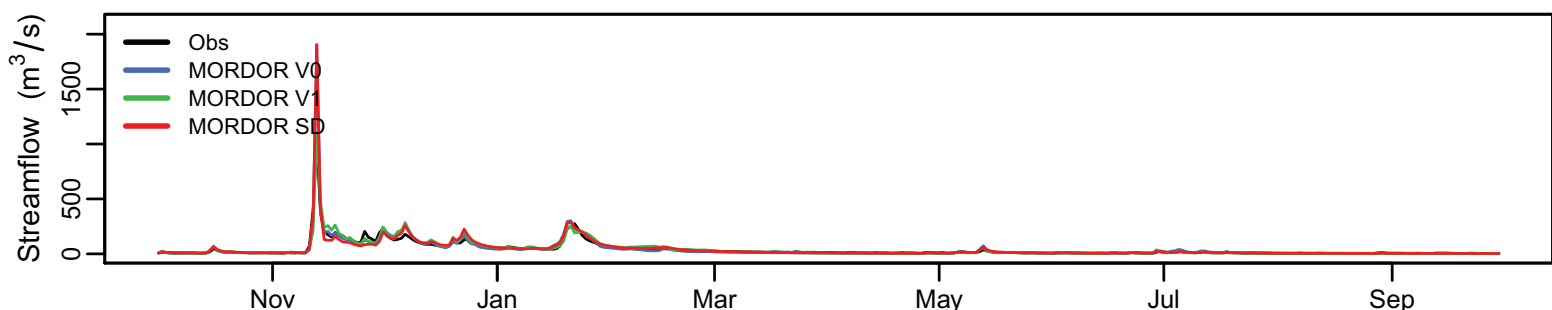

Year 1998

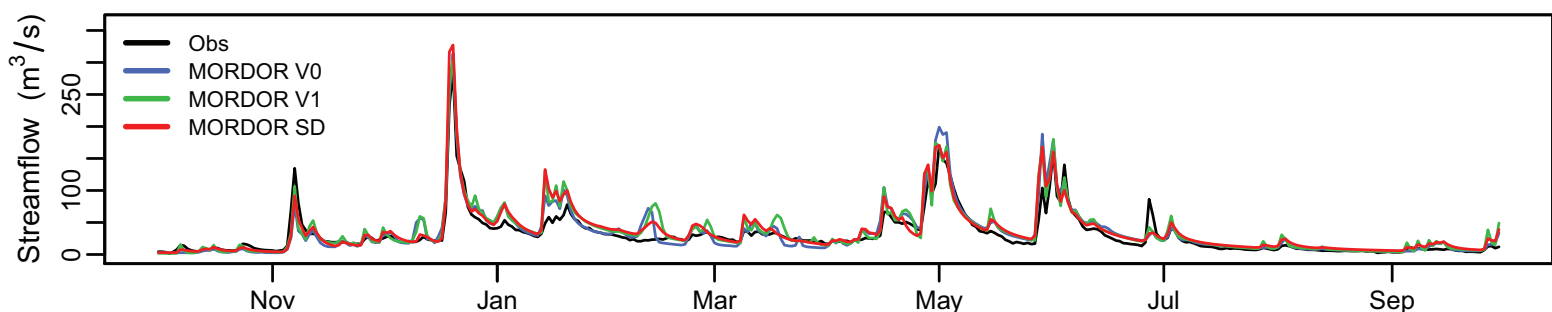

# Loire@Basset

Year 1999

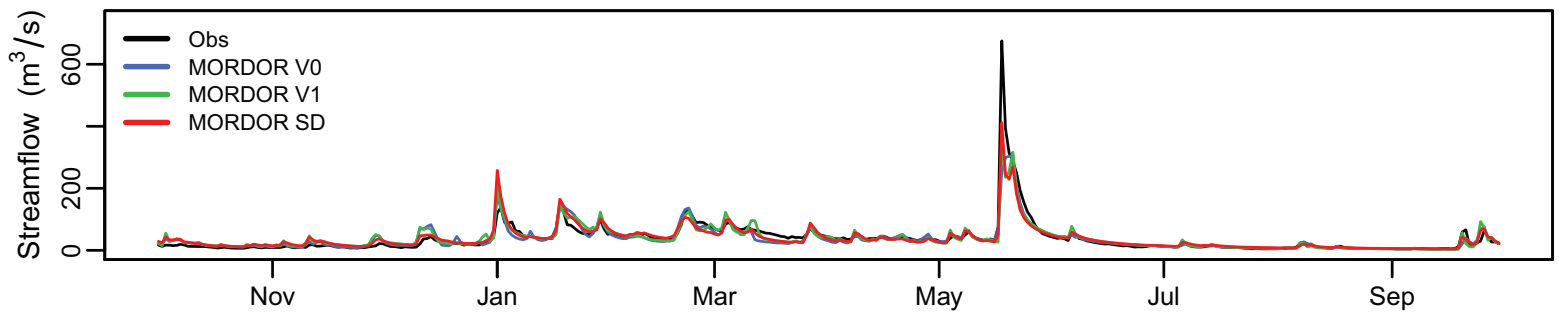

Year 2000

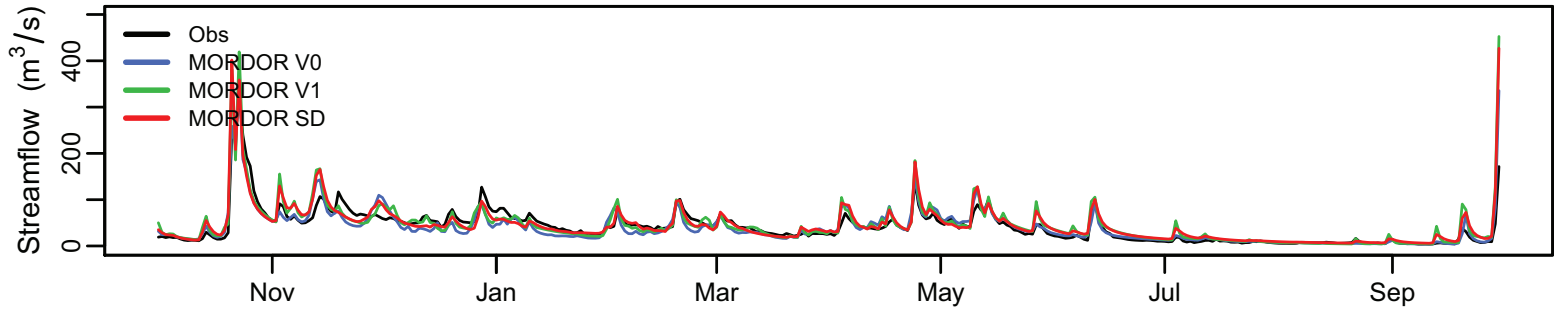

Year 2001

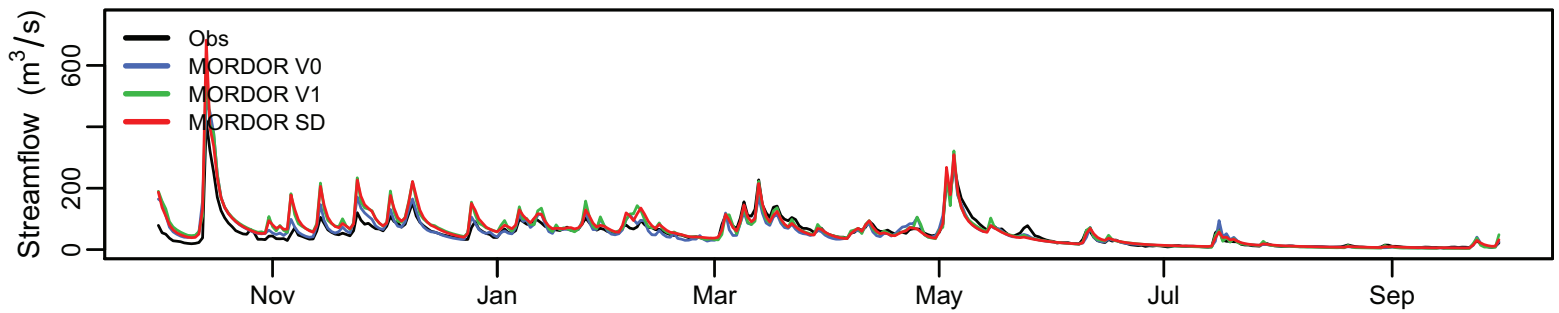

Year 2002

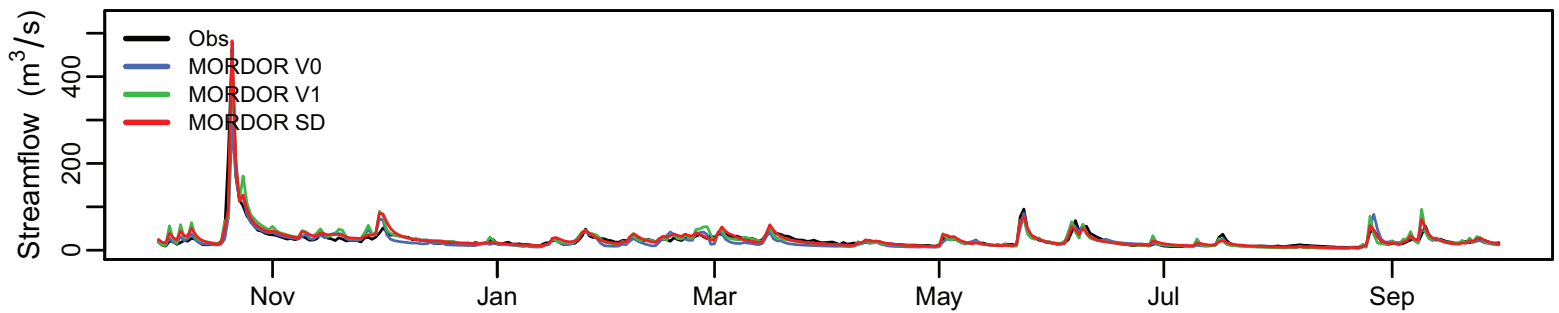

Year 2003

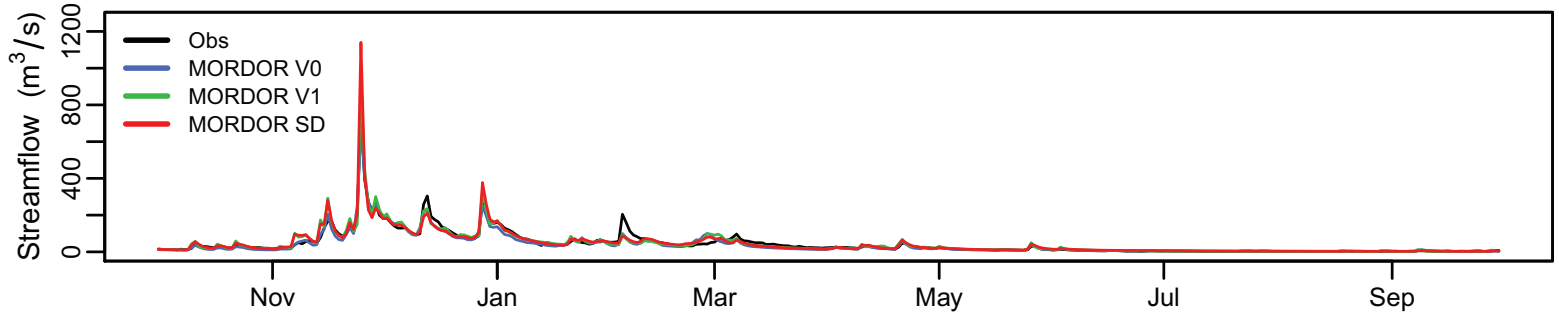

Year 2004

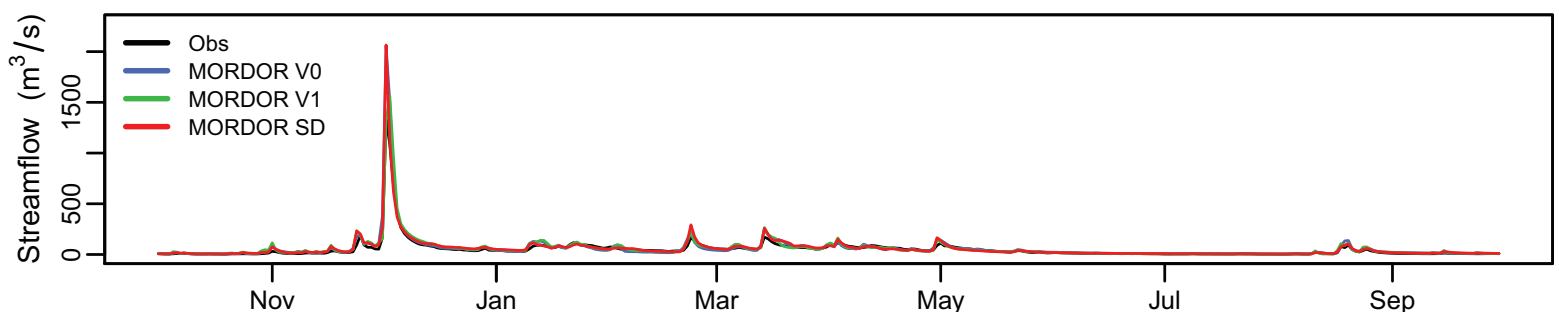

# Loire@Basset

Year 2005

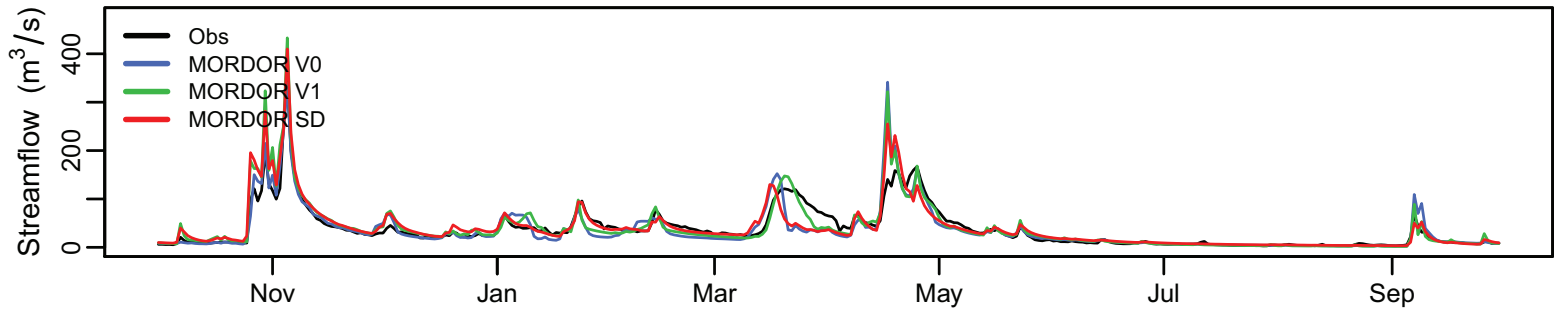

Year 2006

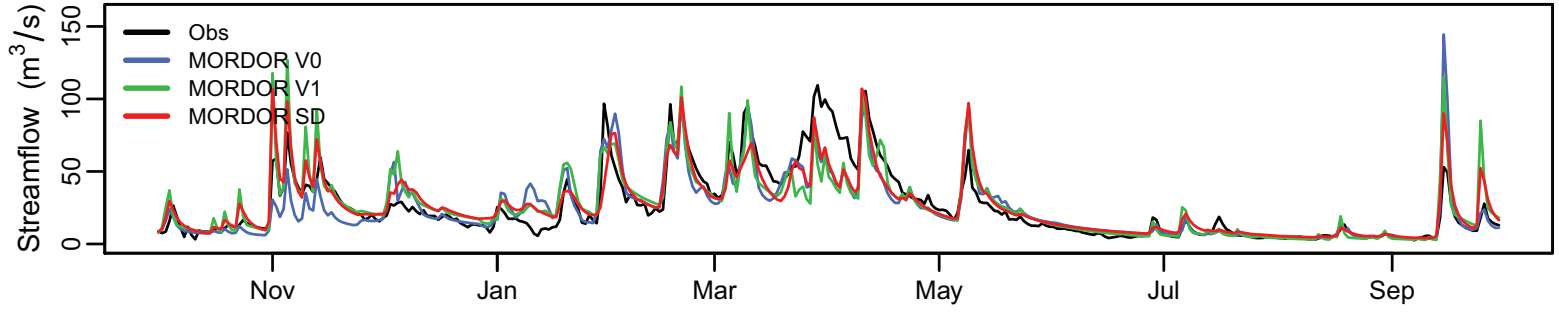

Year 2007

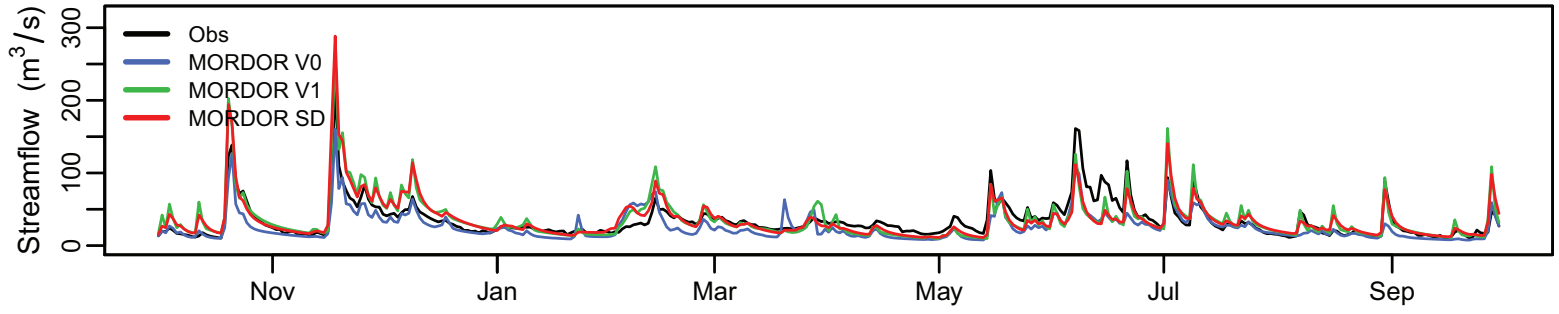

Year 2008

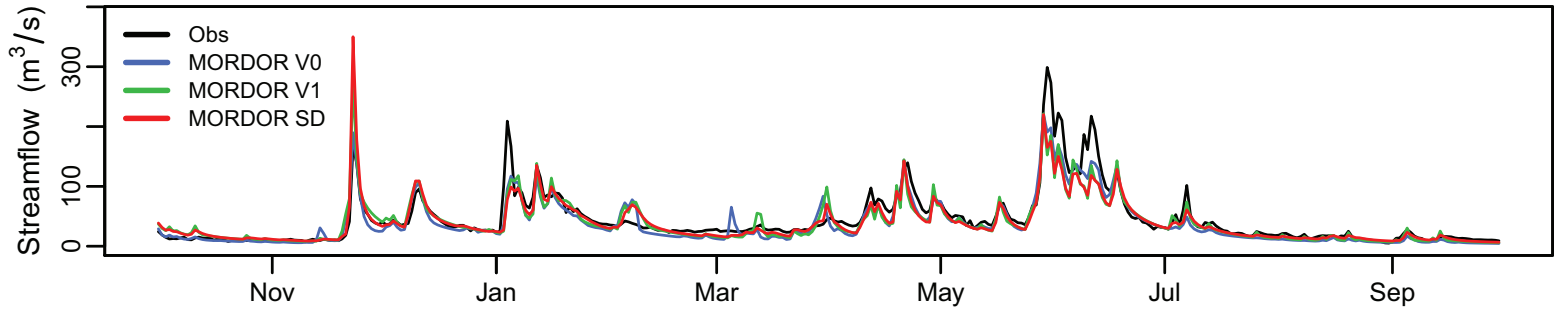

Year 2009

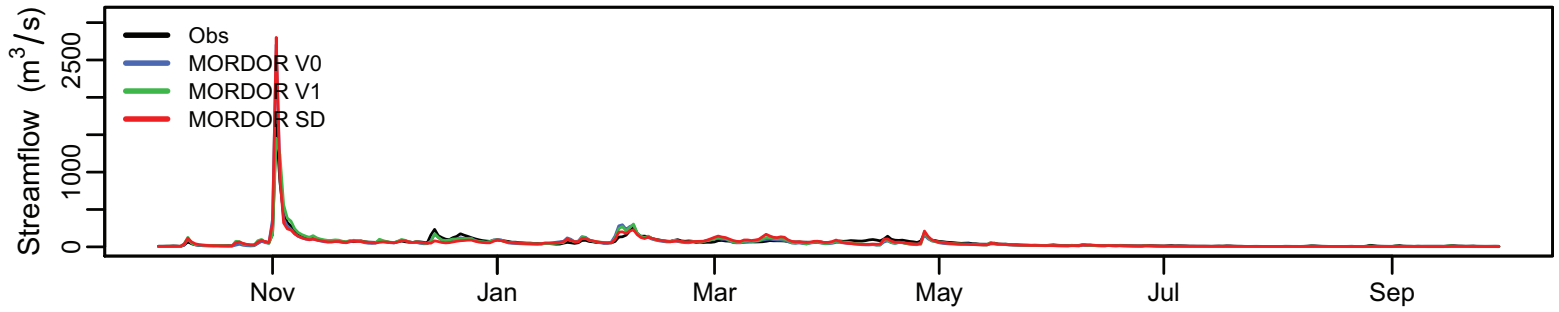

Year 2010

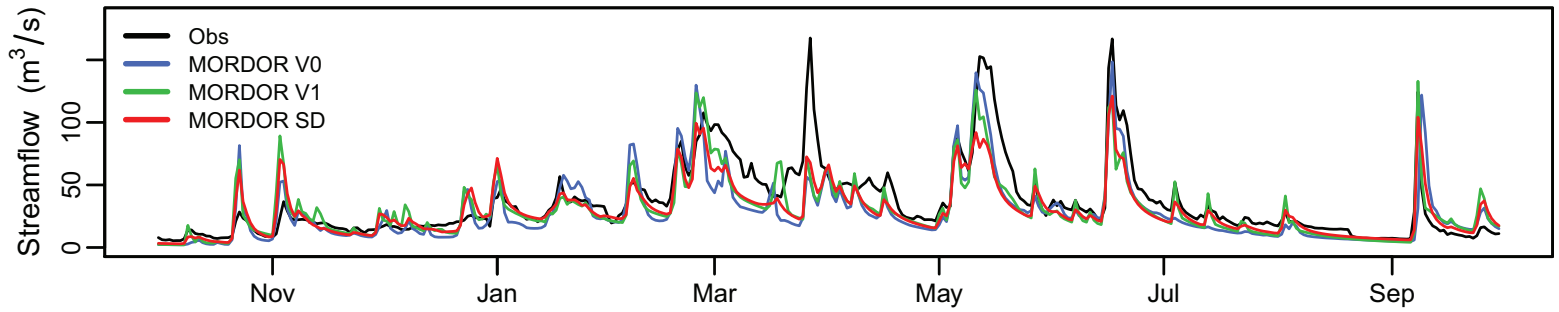

# Loire@LaPalisse

Year 1993

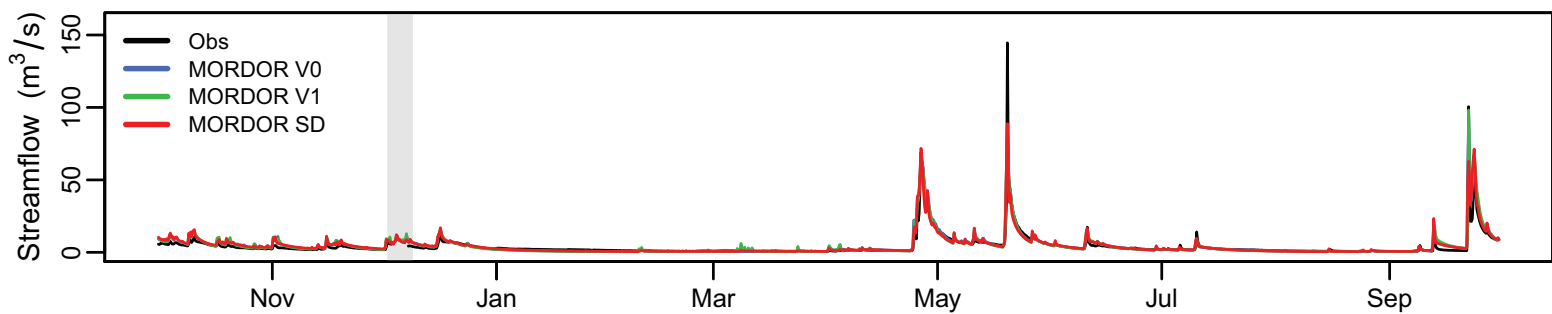

Year 1994

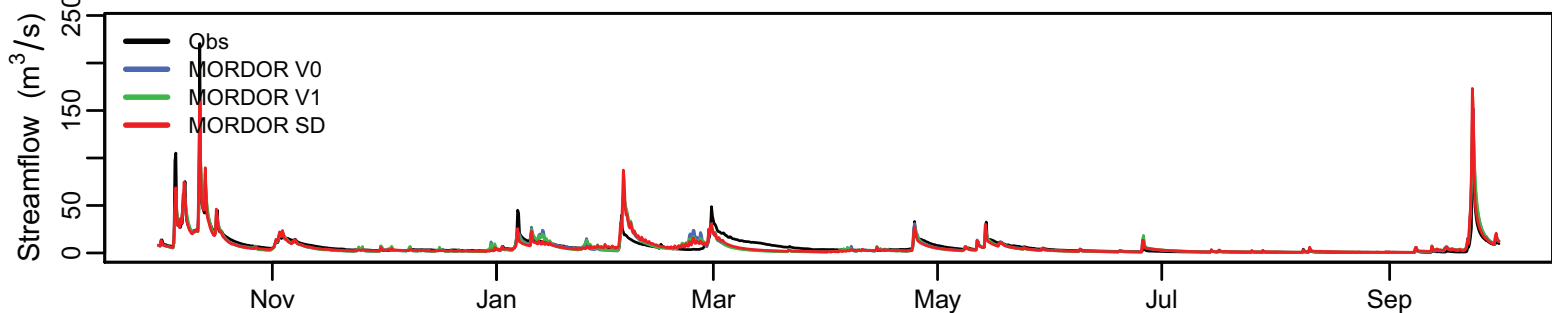

Year 1995

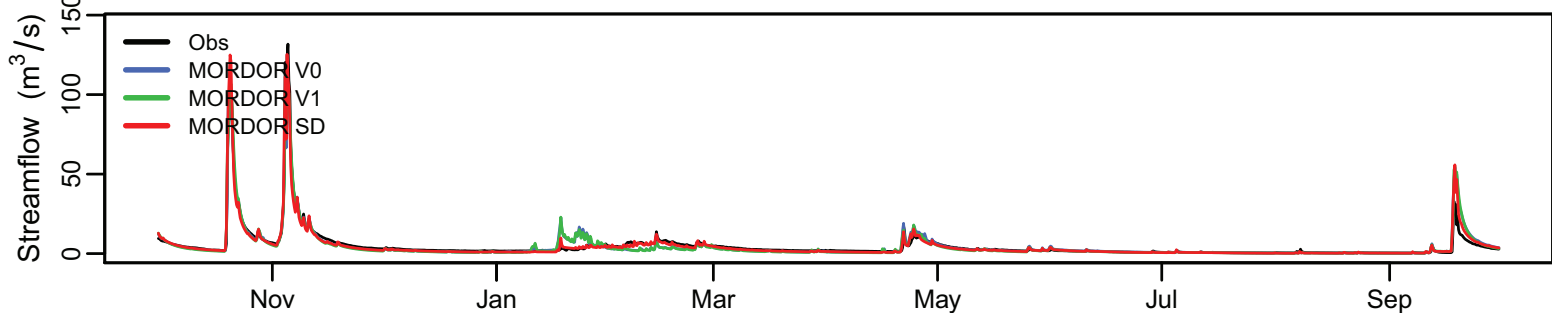

Year 1996

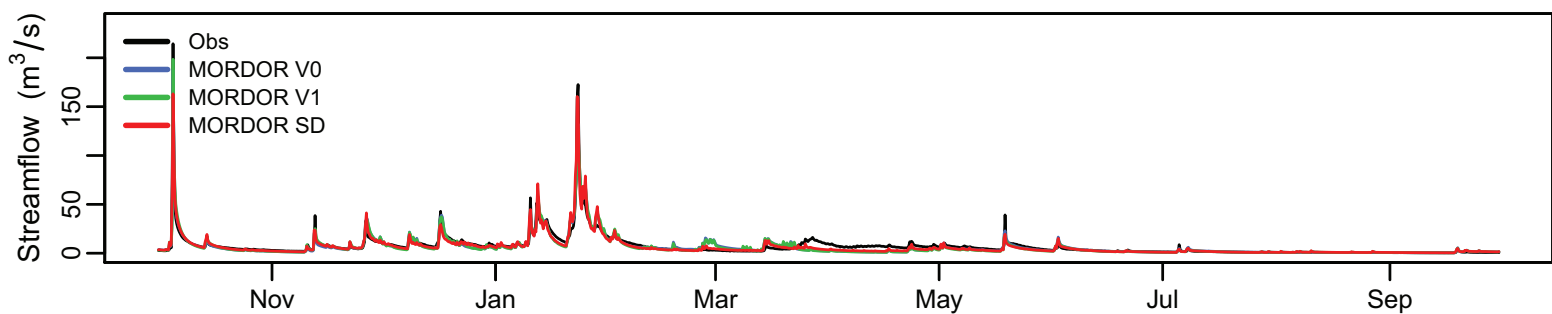

Year 1997

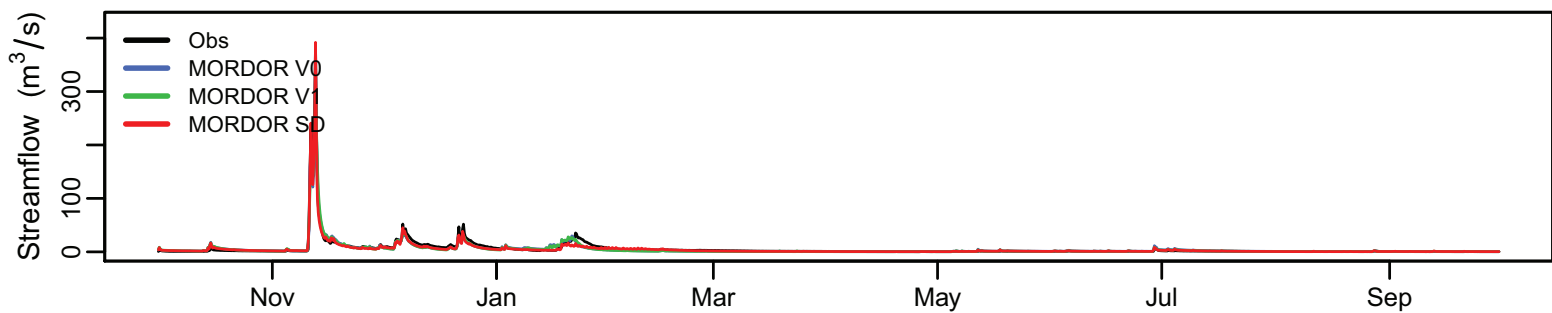

Year 1998

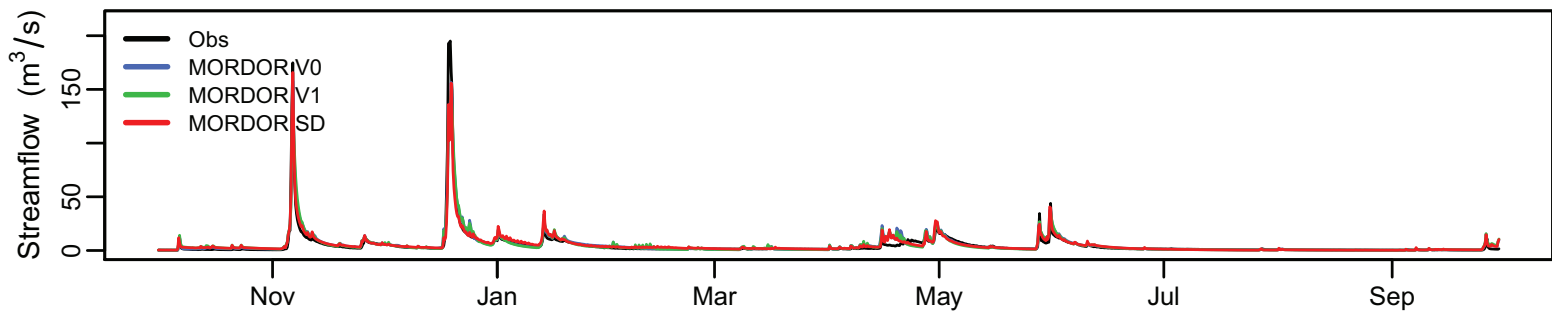

# Loire@LaPalisse

Year 1999

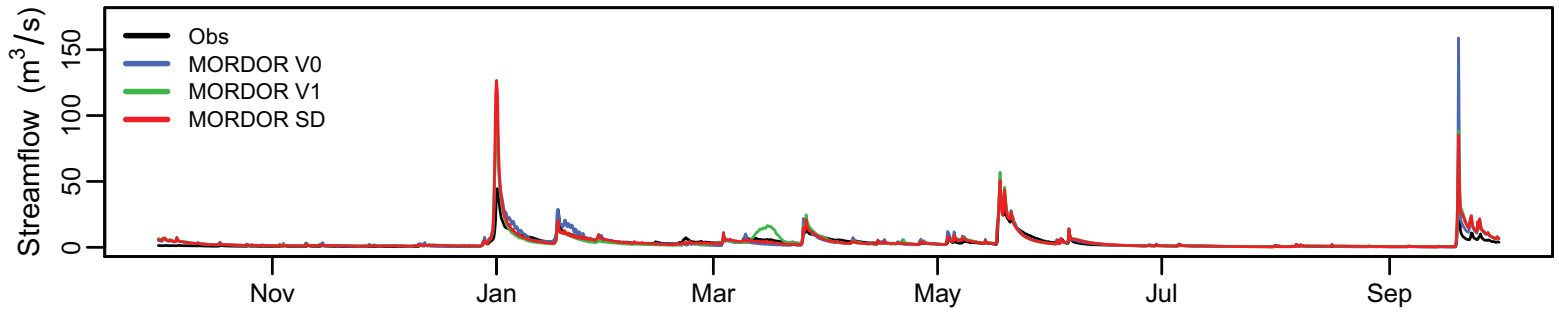

Year 2000

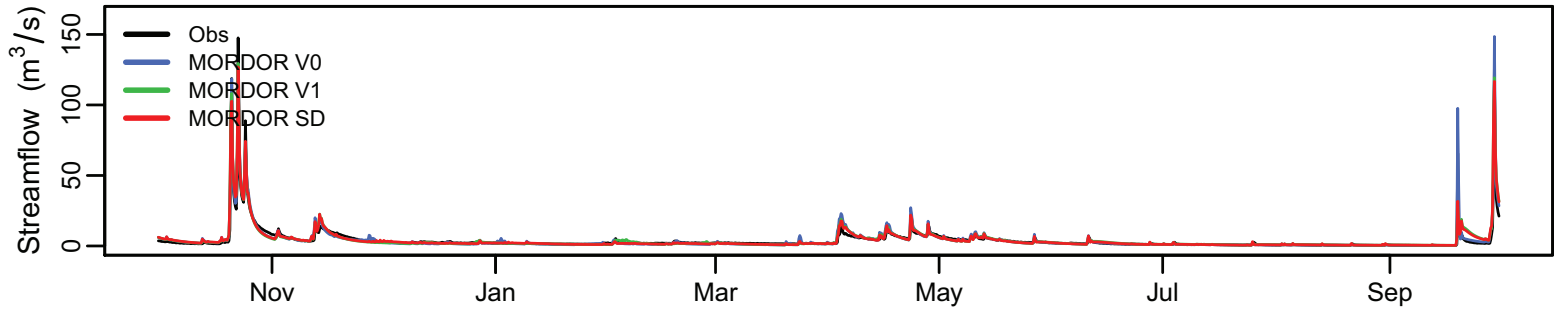

Year 2001

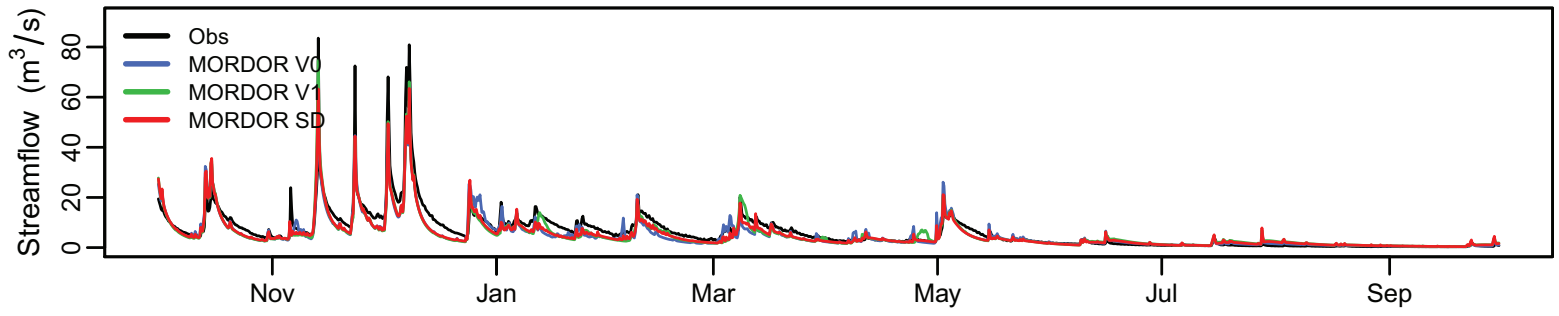

Year 2002

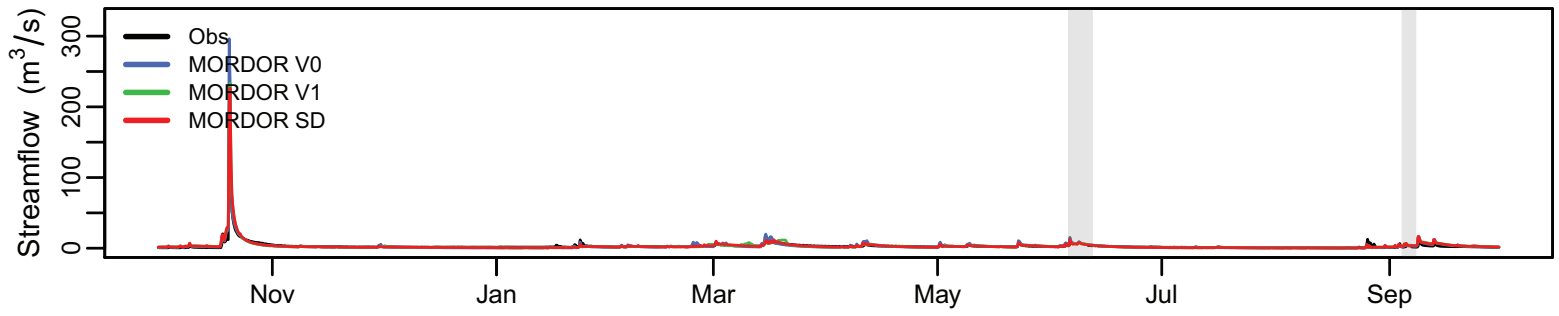

Year 2003

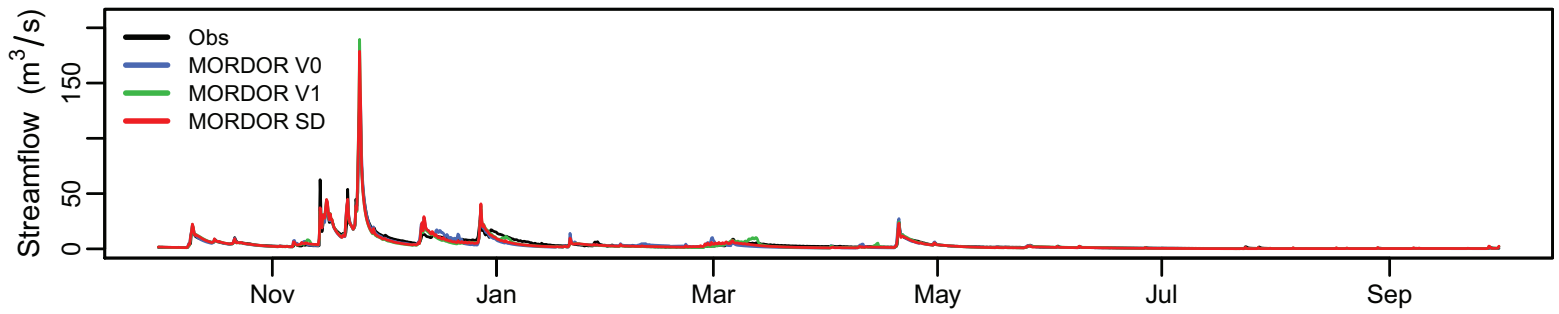

Year 2004

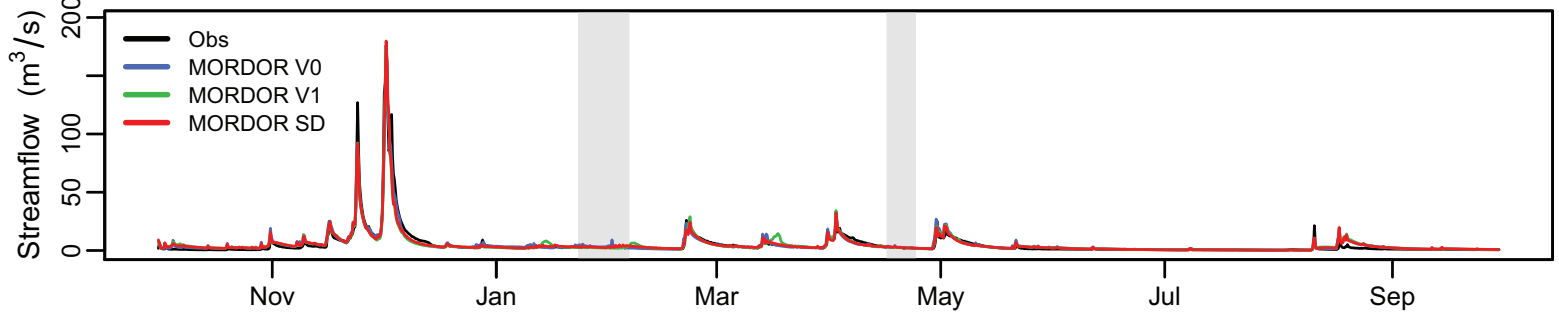

# Lot@Castelnau

Year 1983

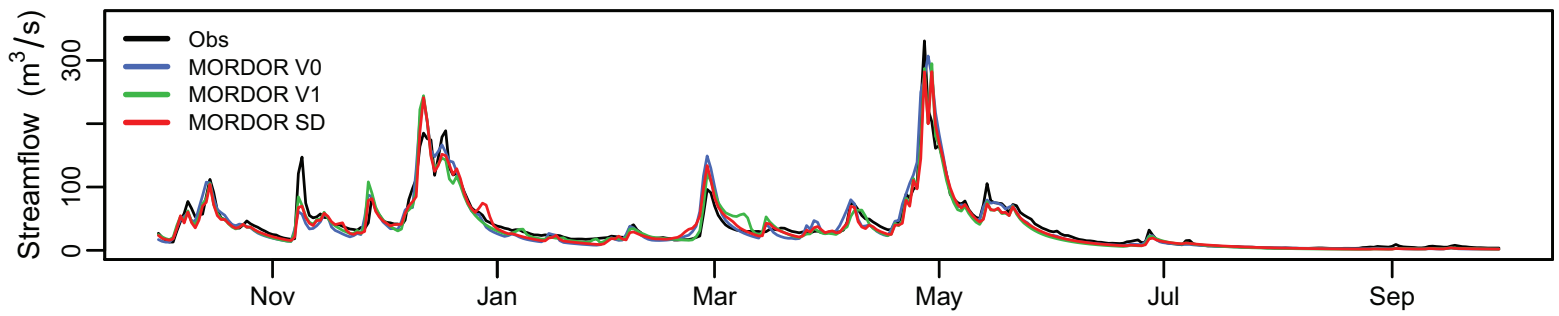

Year 1984

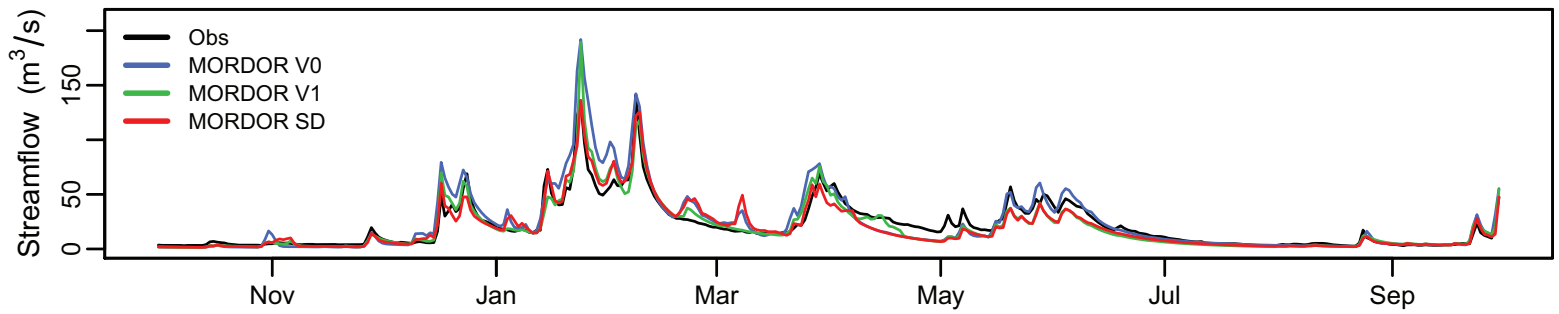

Year 1985

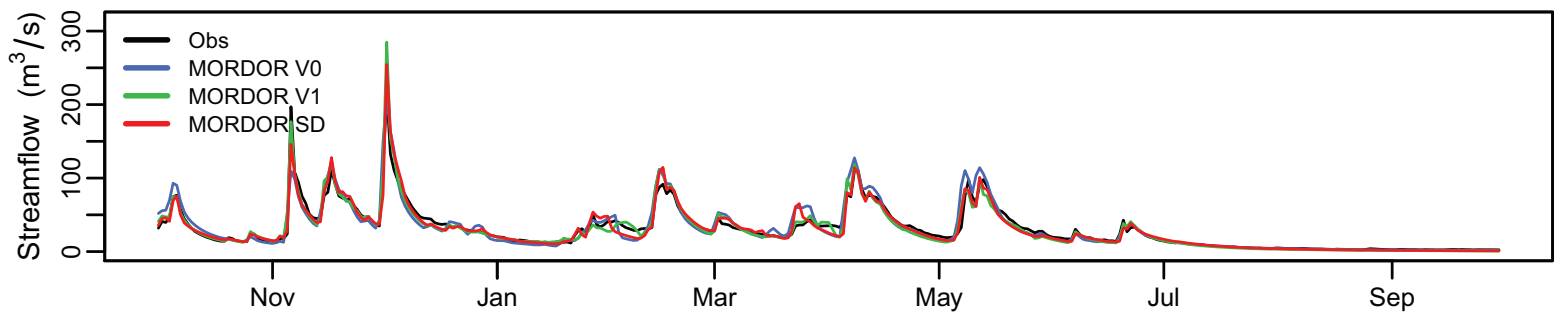

Year 1986

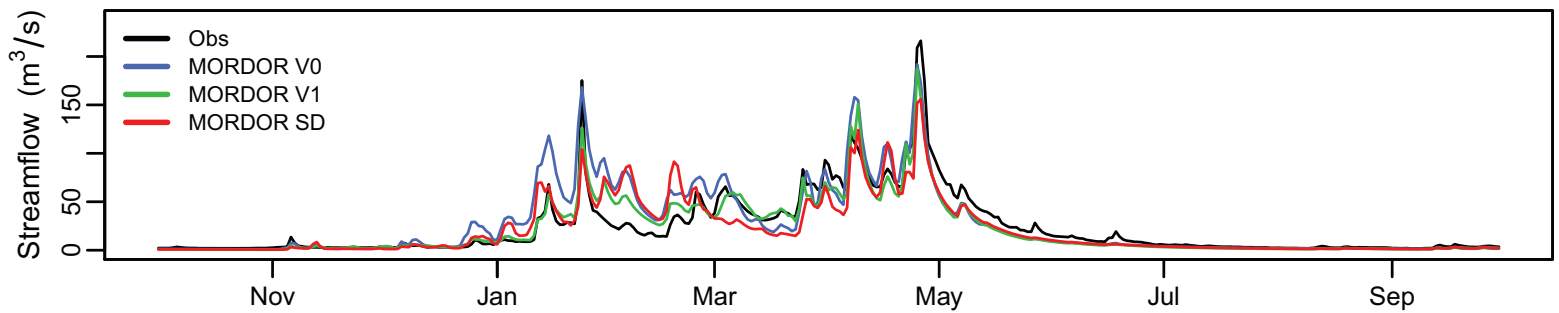

Year 1987

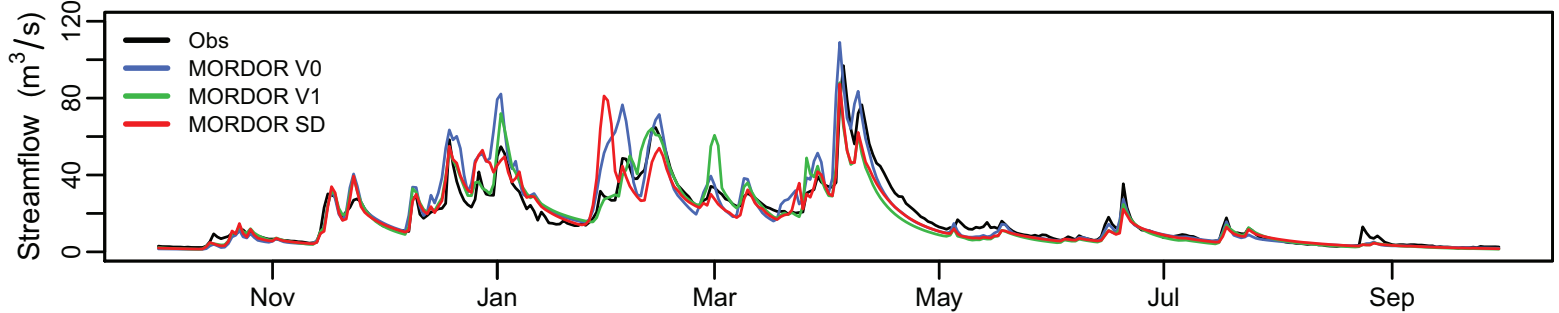

Year 1988

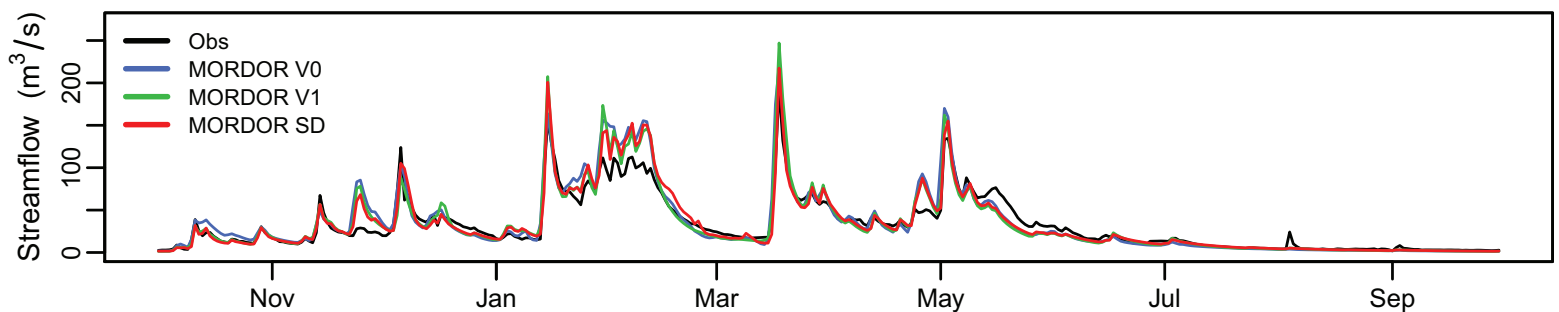



# Lot@Castelnau

Year 1989

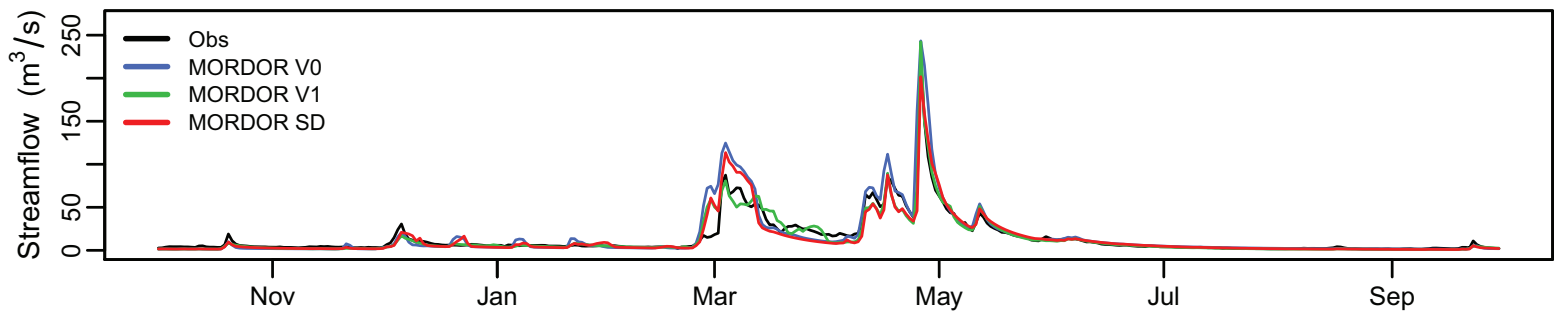

Year 1990

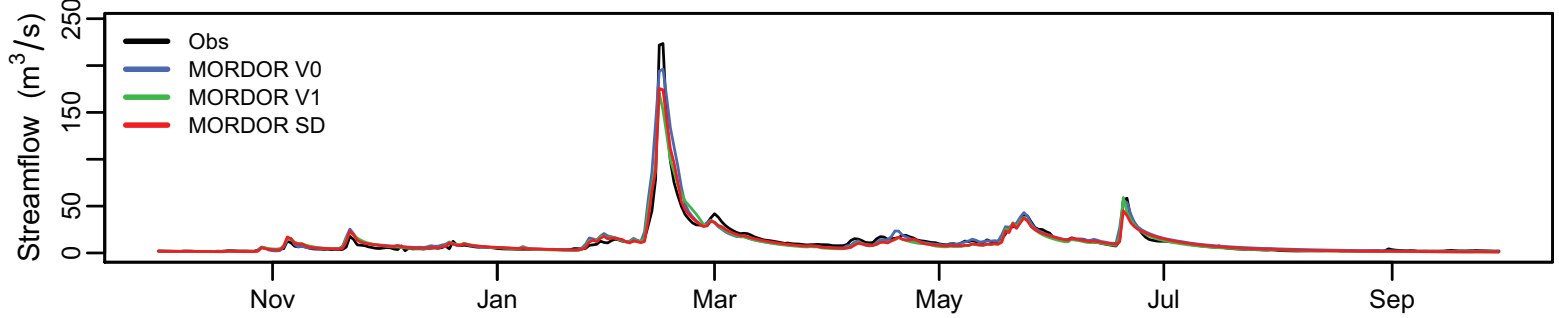

Year 1991

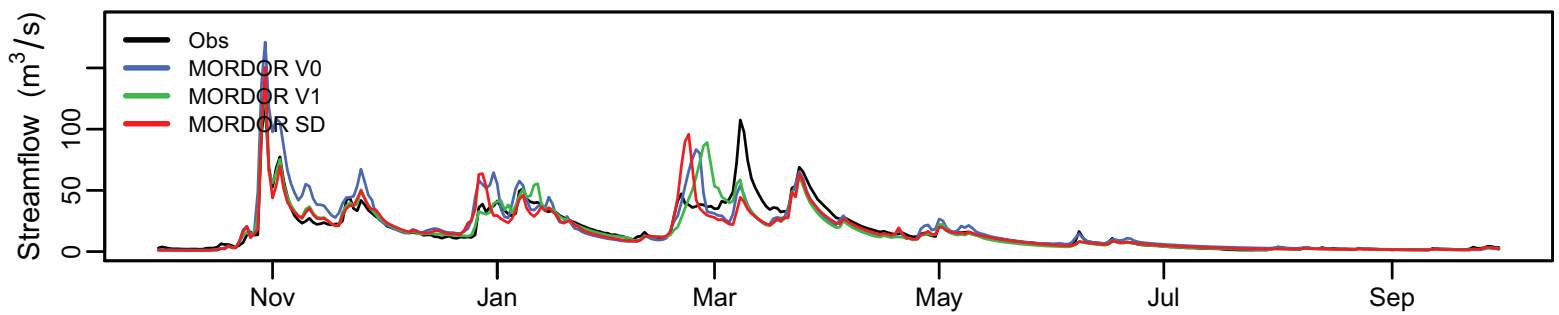

Year 1992

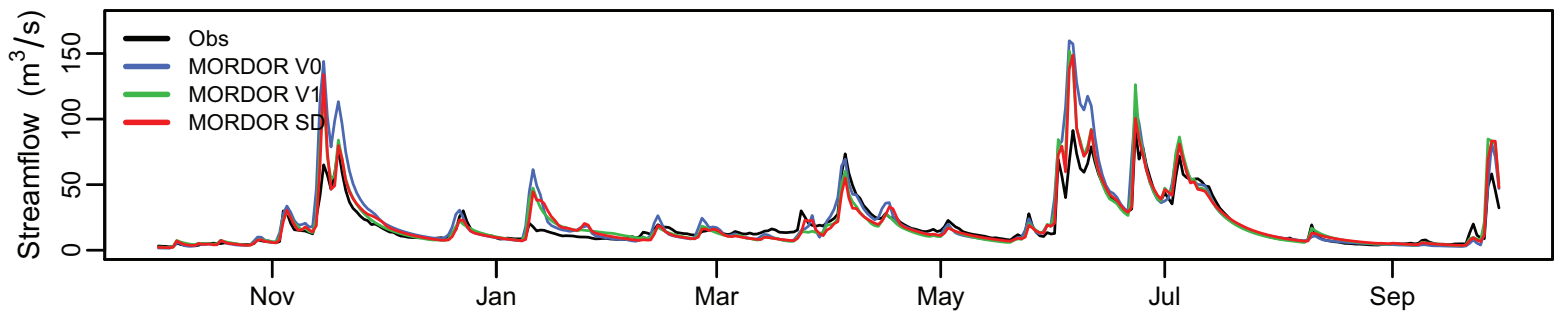

Year 1993

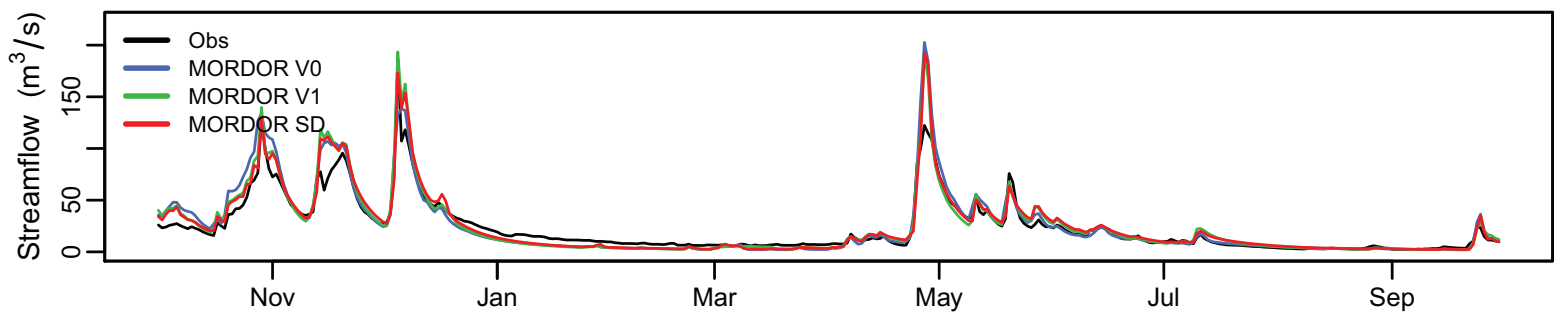

Year 1994

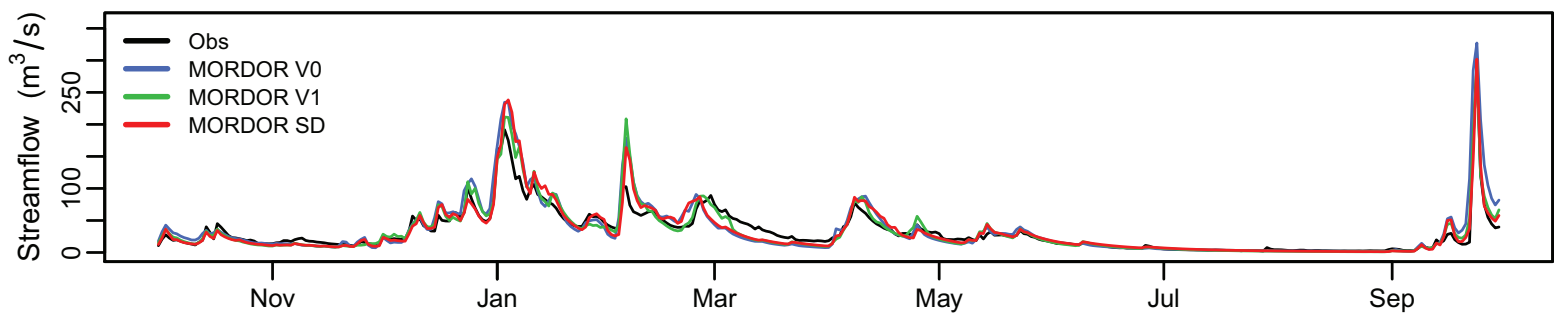

# Lot@Castelnau

Year 1995

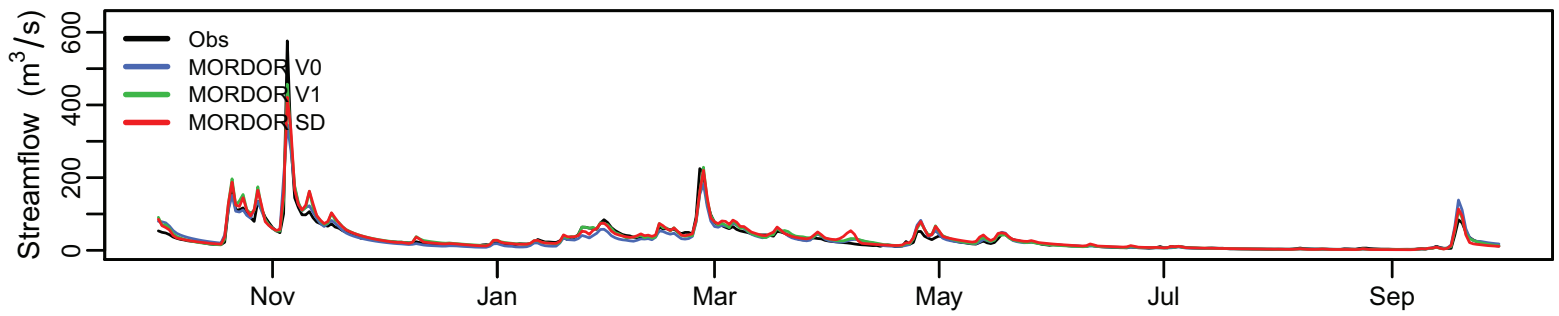

Year 1996

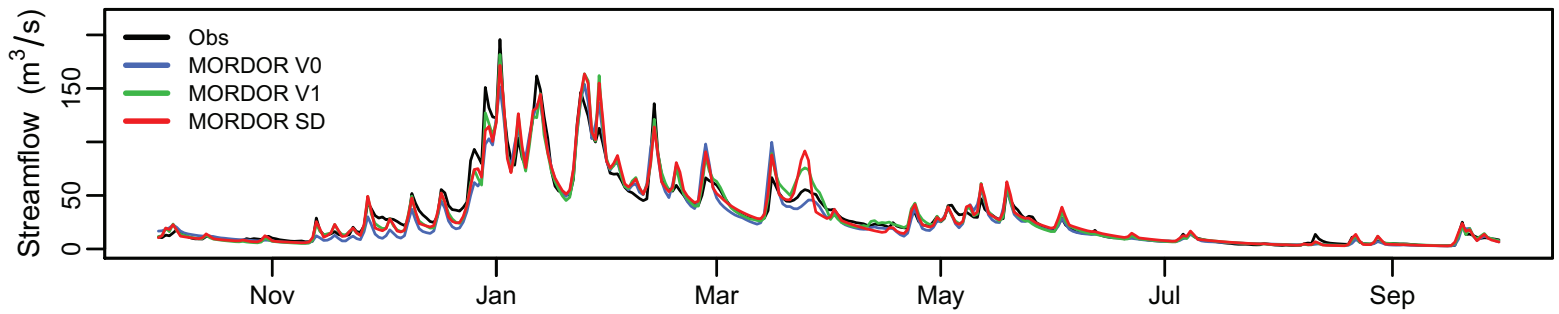

Year 1997

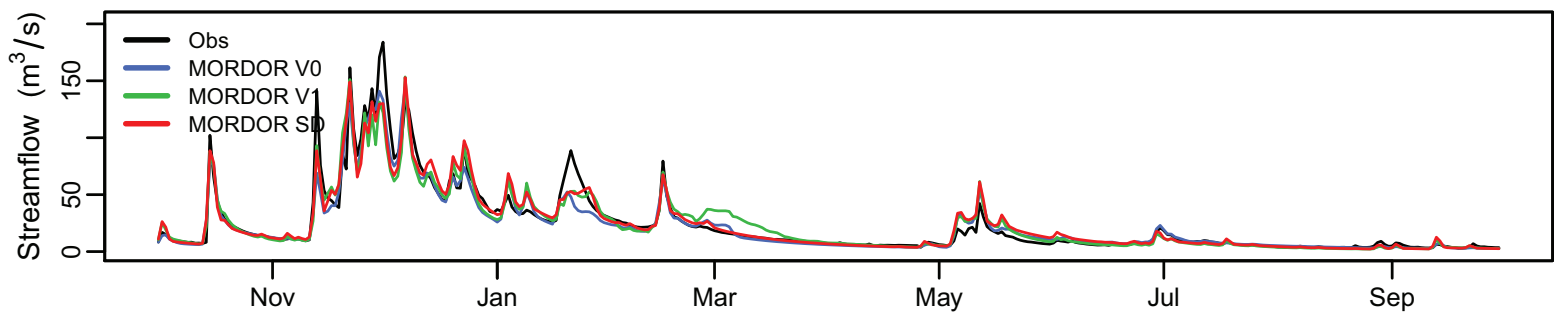

Year 1998

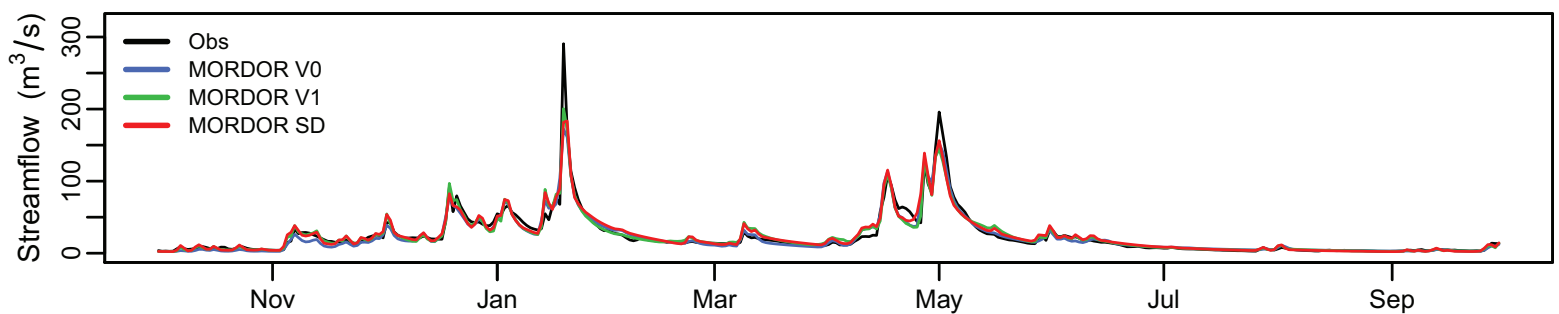

Year 1999

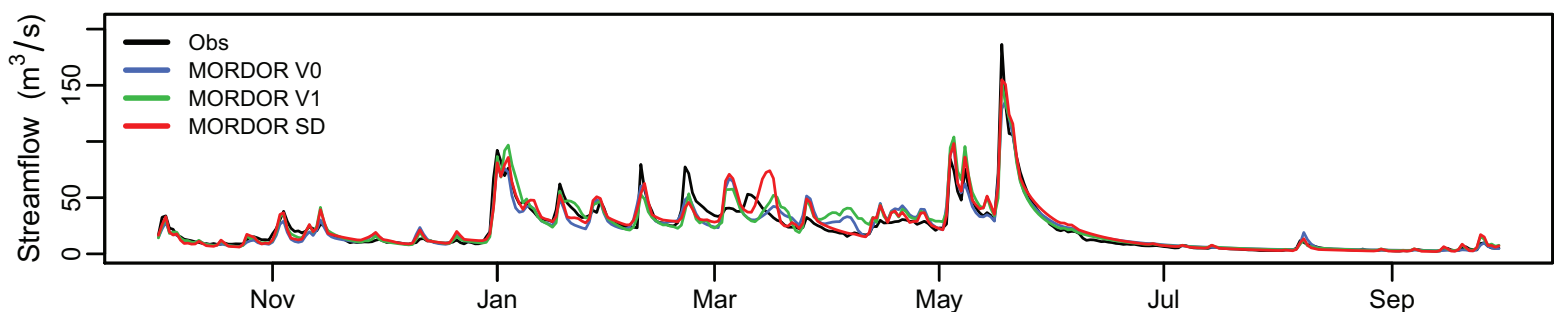

Year 2000

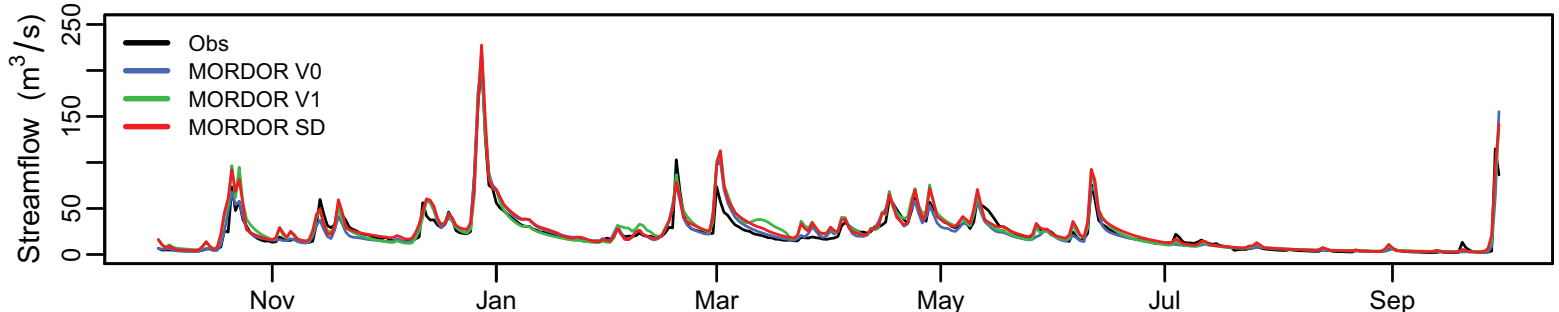

# Lot@Castelnau

Year 2001

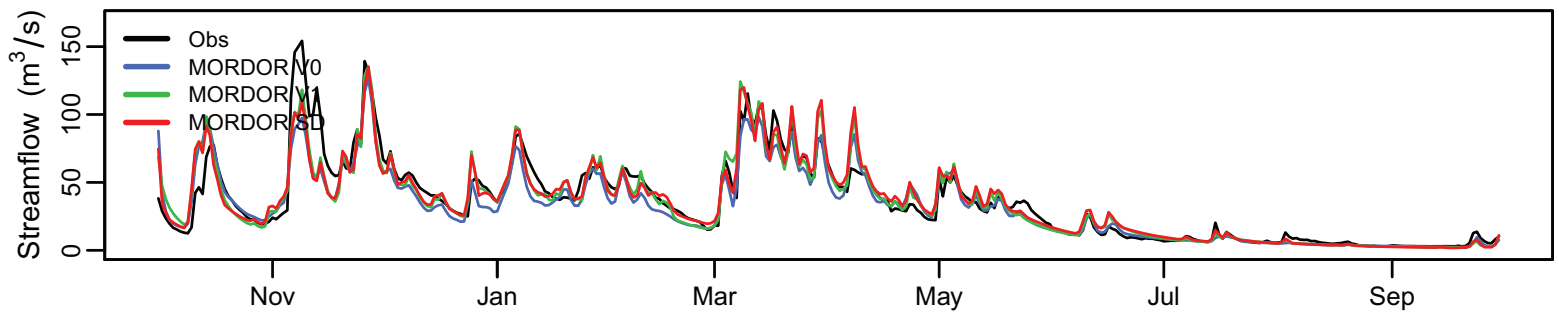

Year 2002

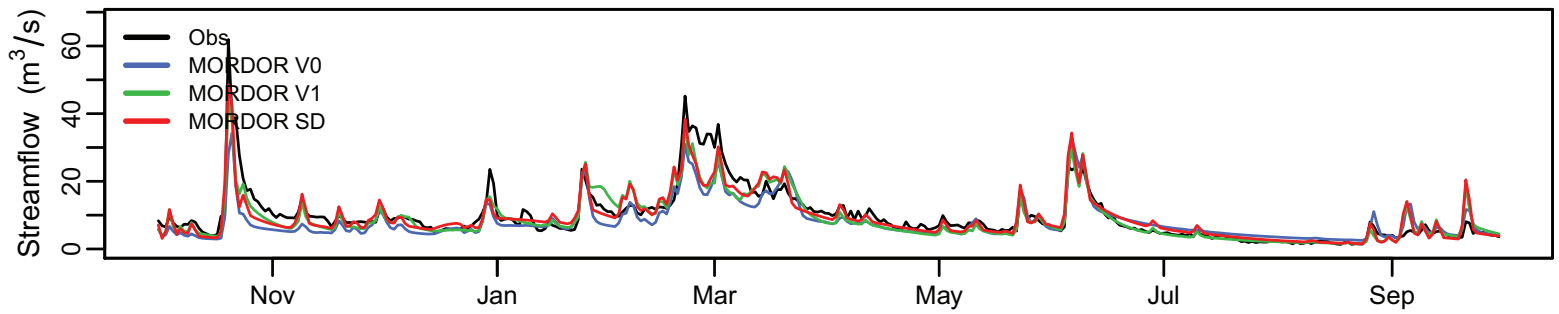

Year 2003

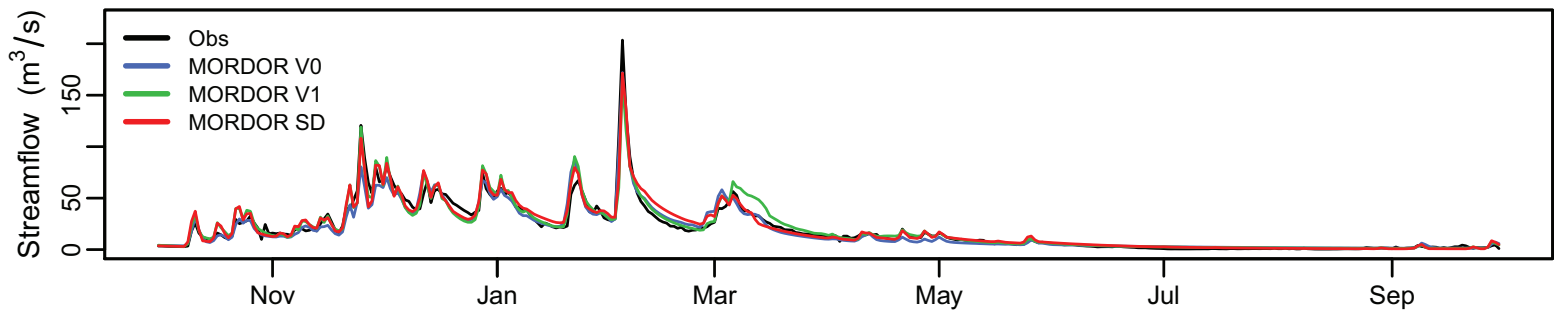

Year 2004

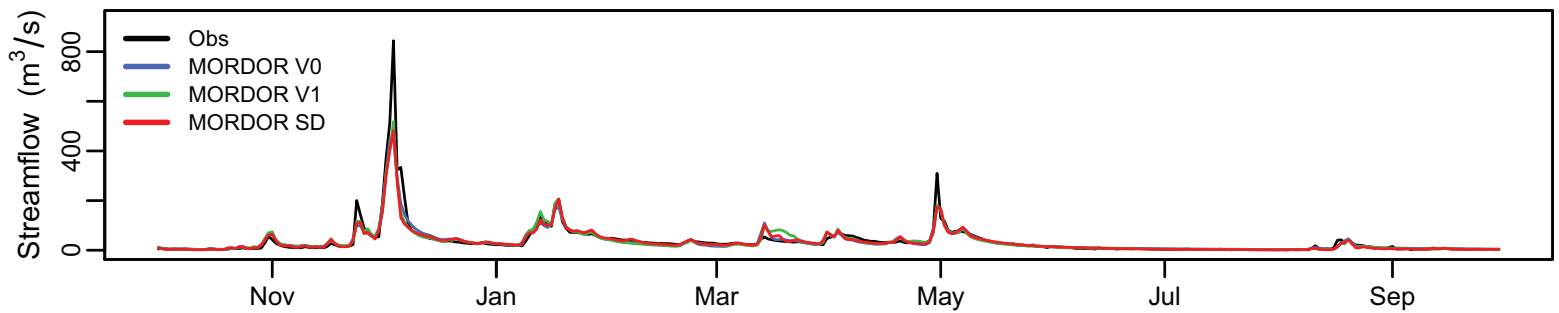

Year 2005

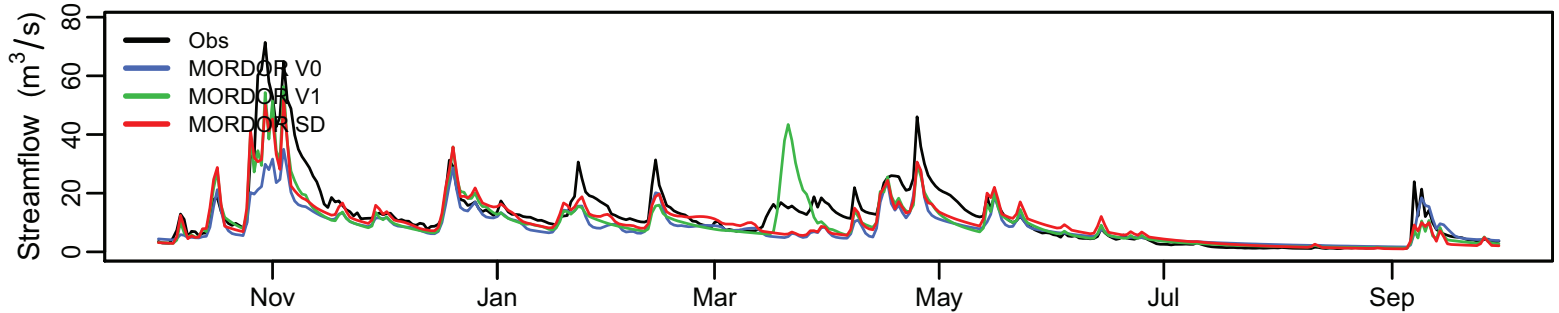

# Mimente@Florac

Year 1986

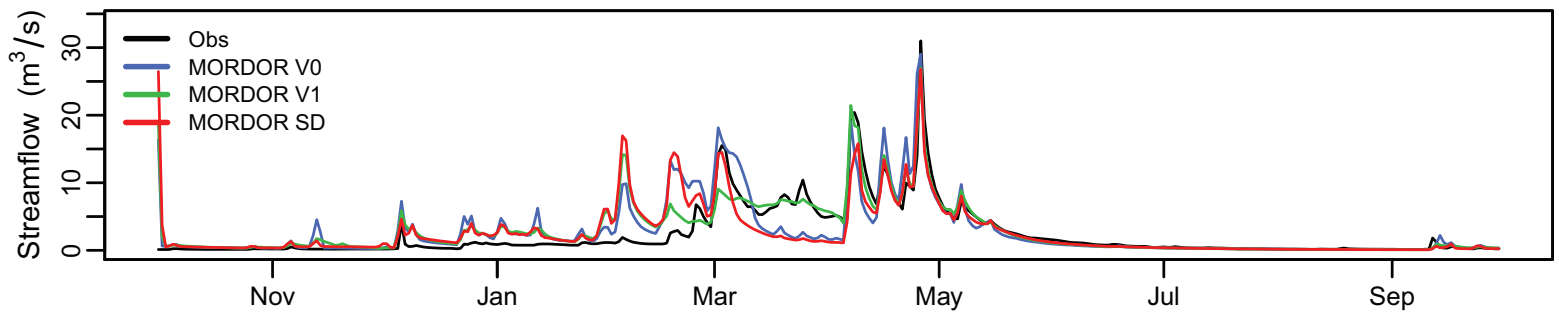

Year 1987

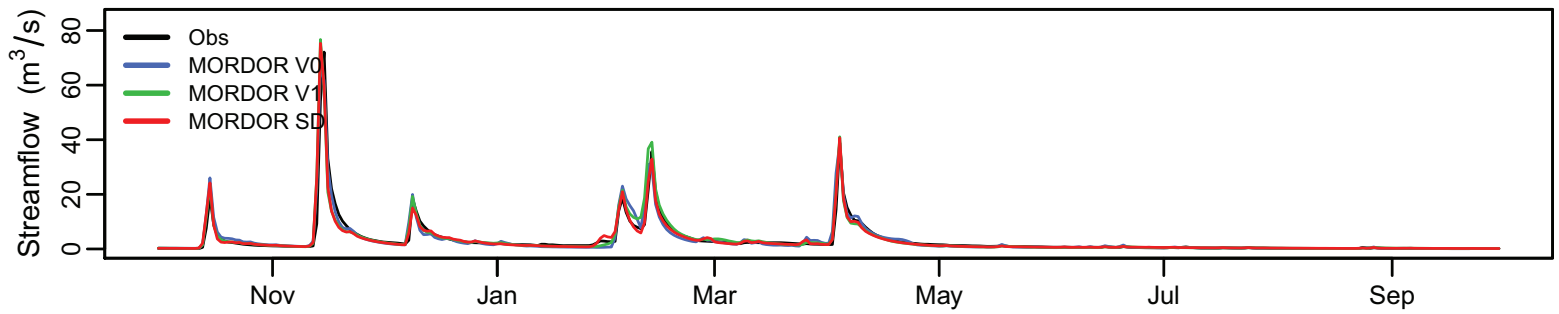

Year 1988

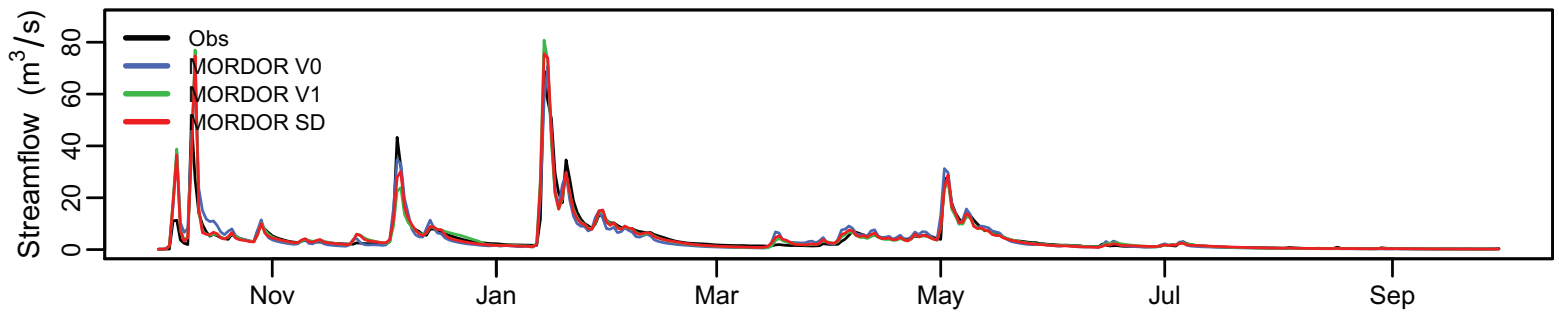

Year 1989

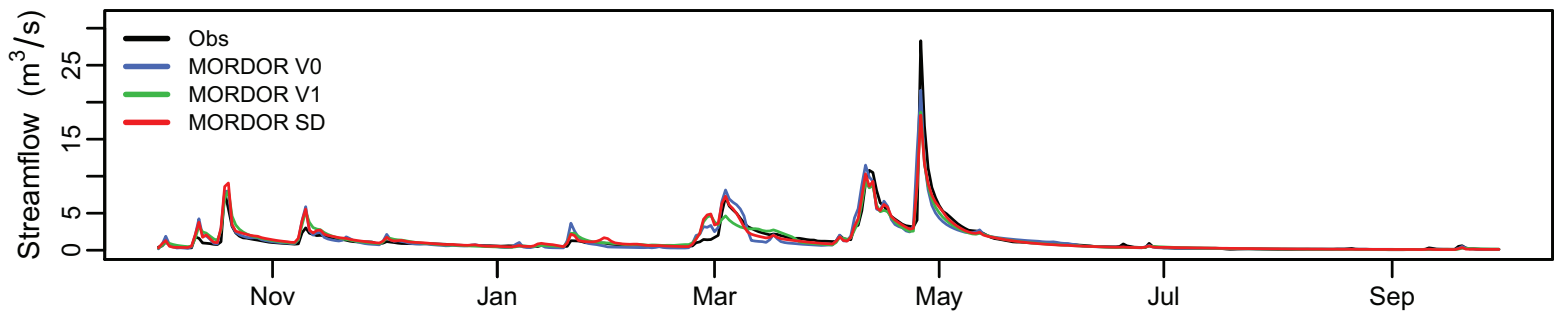

Year 1990

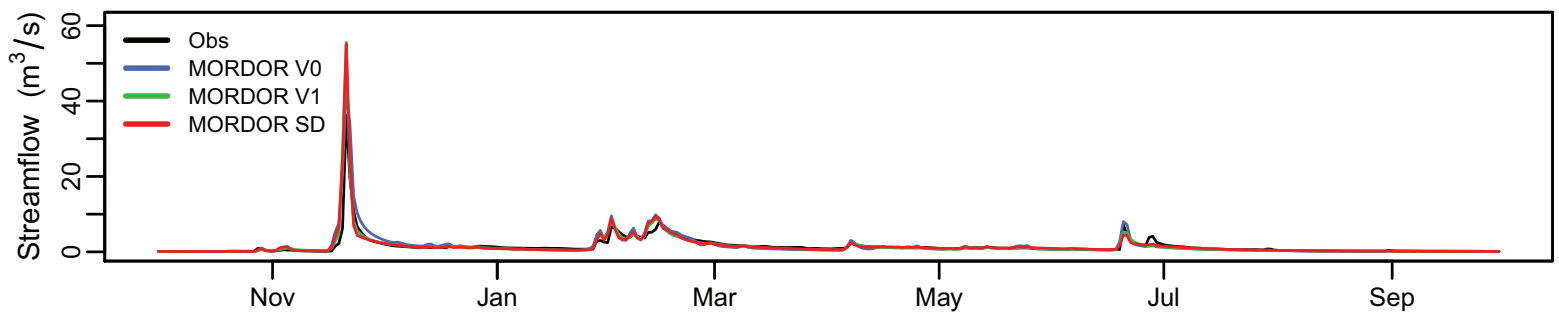

Year 1991

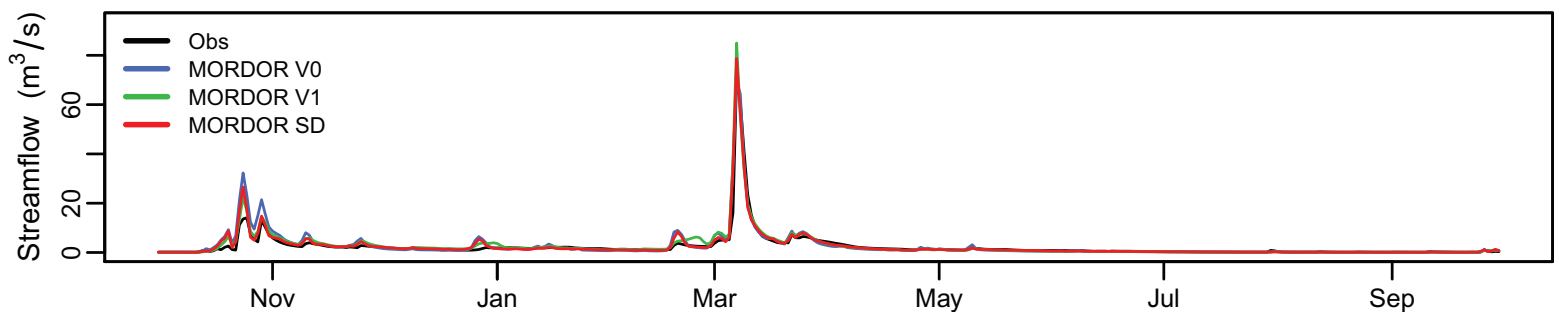

# Mimente@Florac

Year 1992

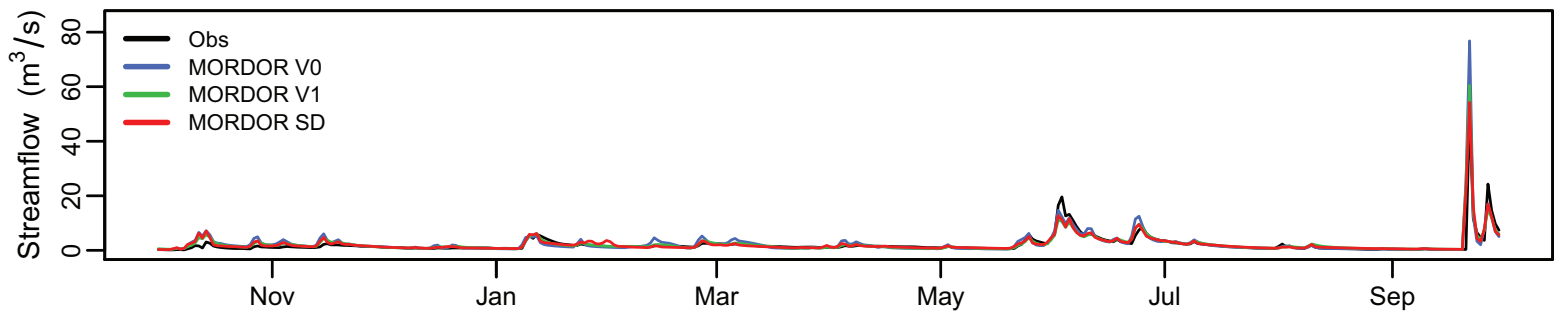

Year 1993

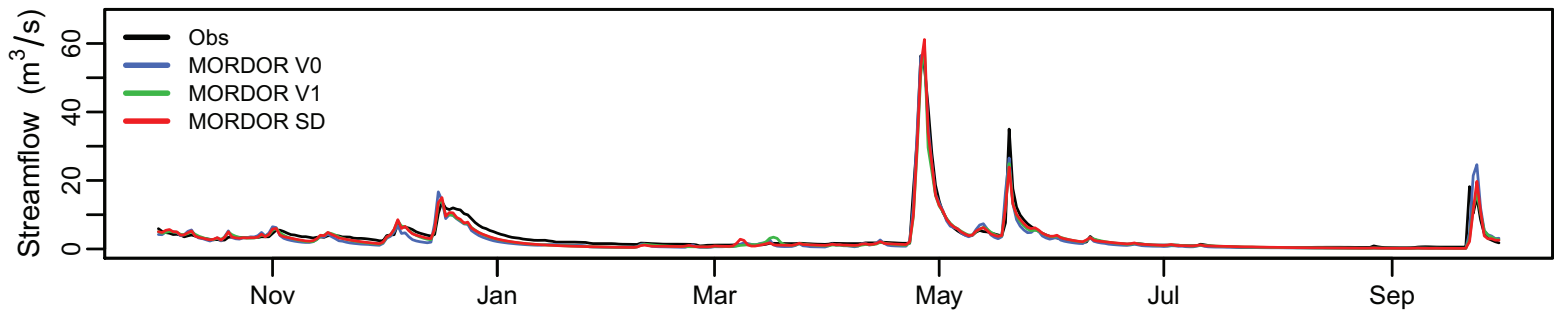

Year 1994

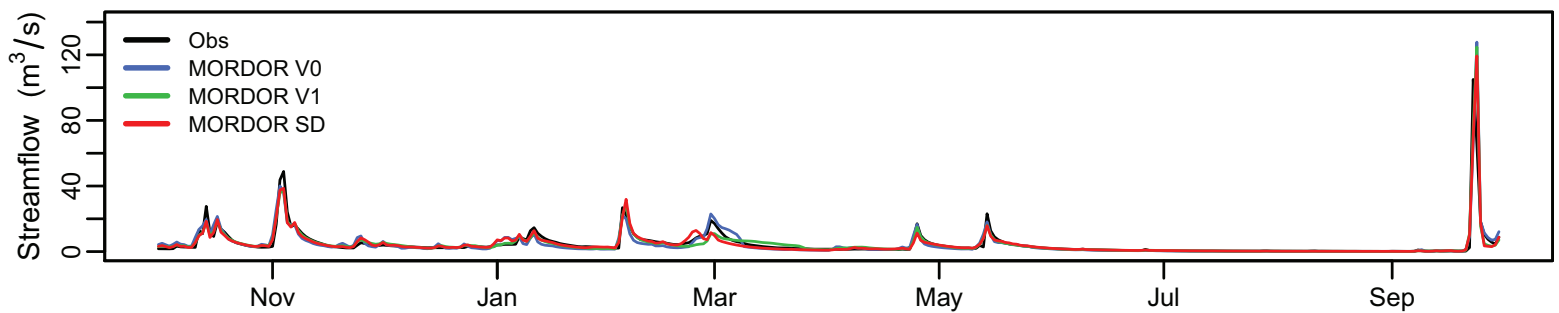

Year 1995

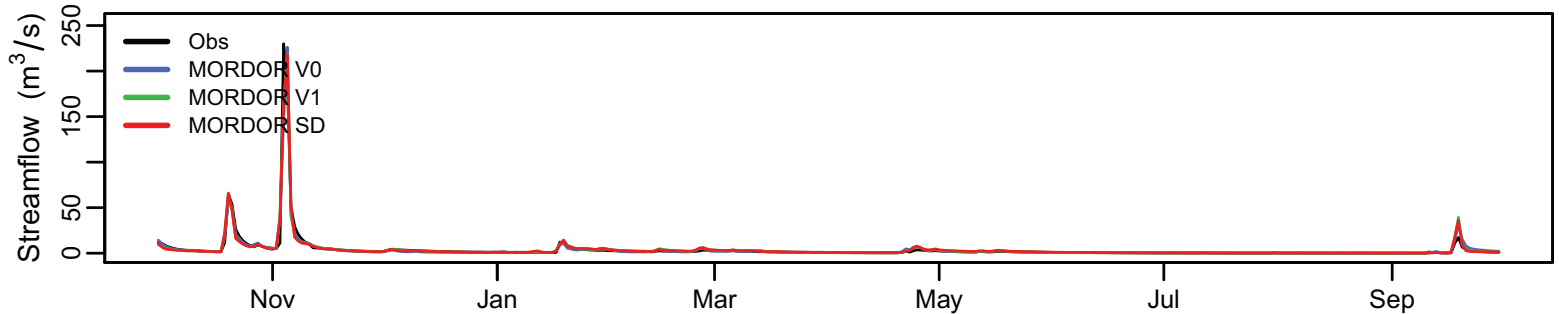

Year 1996

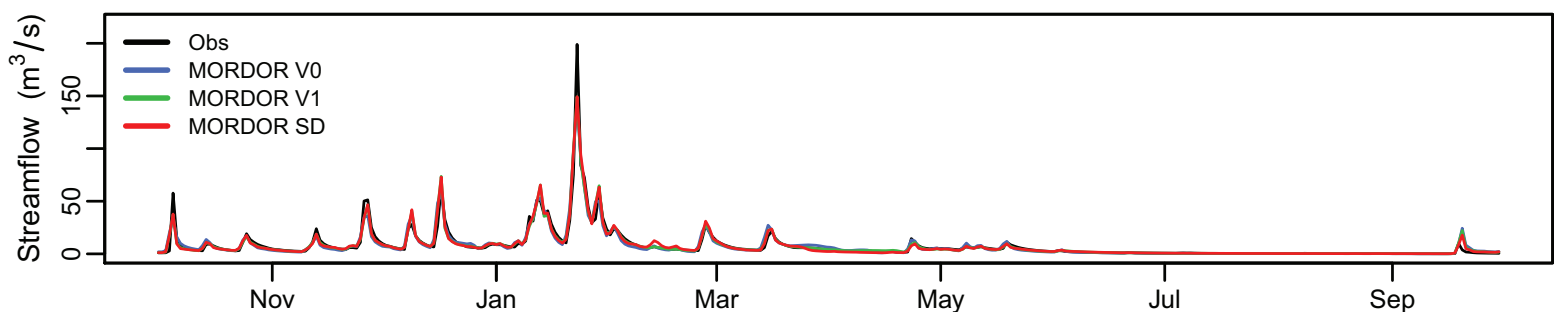

Year 1997

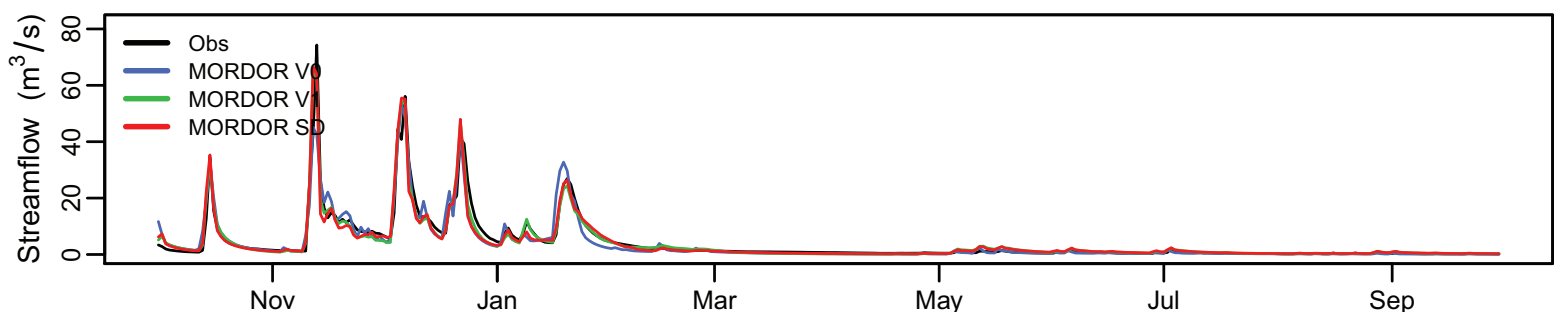

# Mimente@Florac

Year 1998

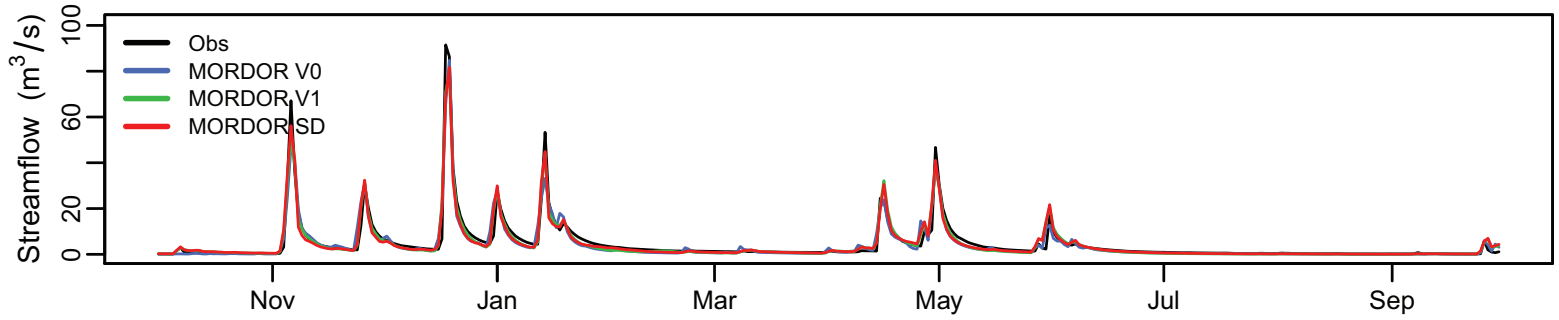

Year 1999

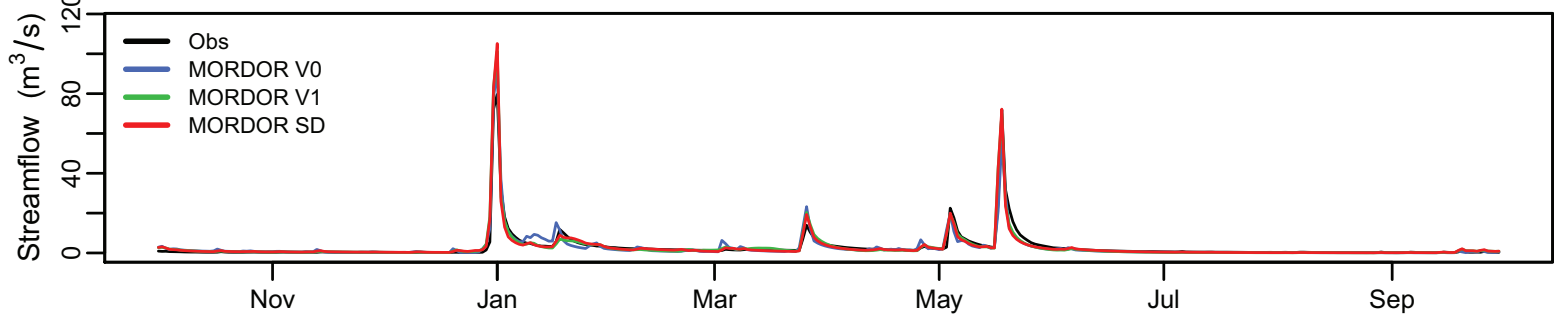

Year 2000

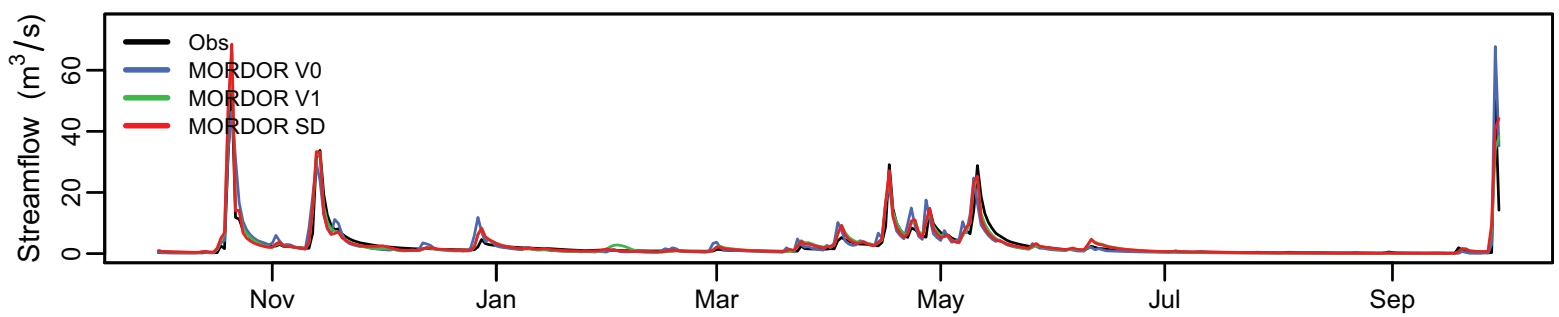

Year 2001

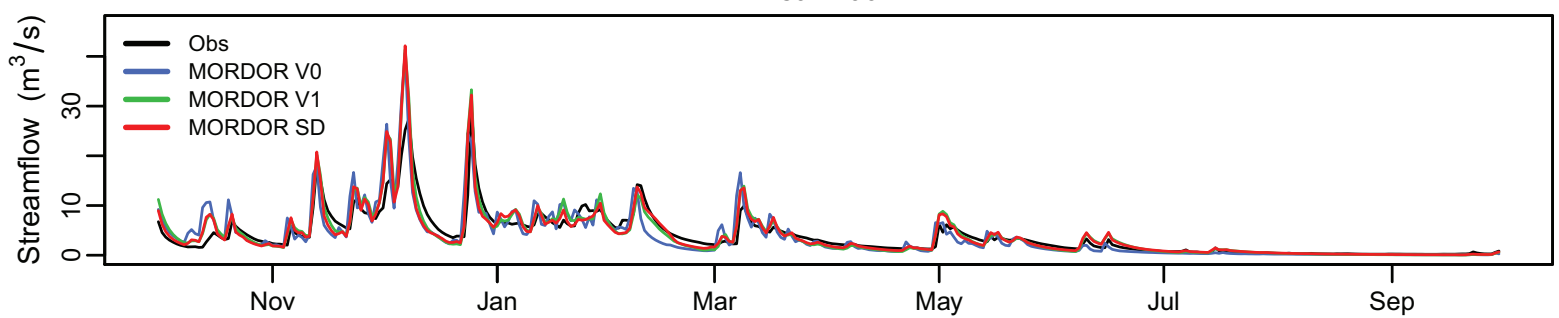

Year 2002

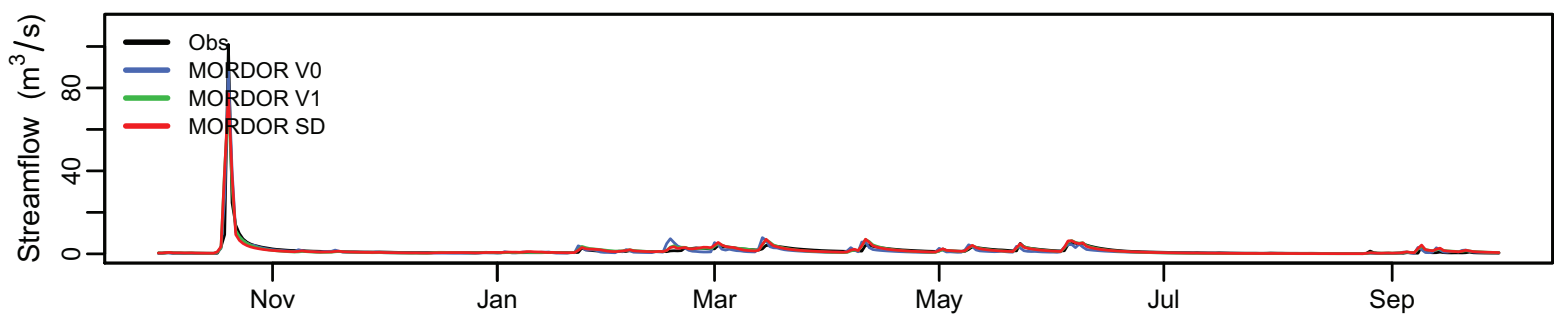

Year 2003

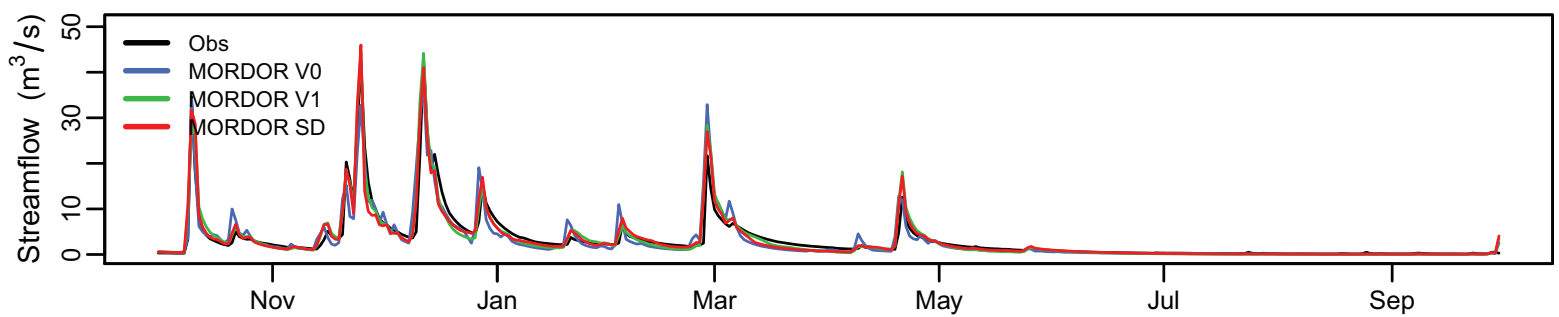

# Mimente@Florac

Year 2004

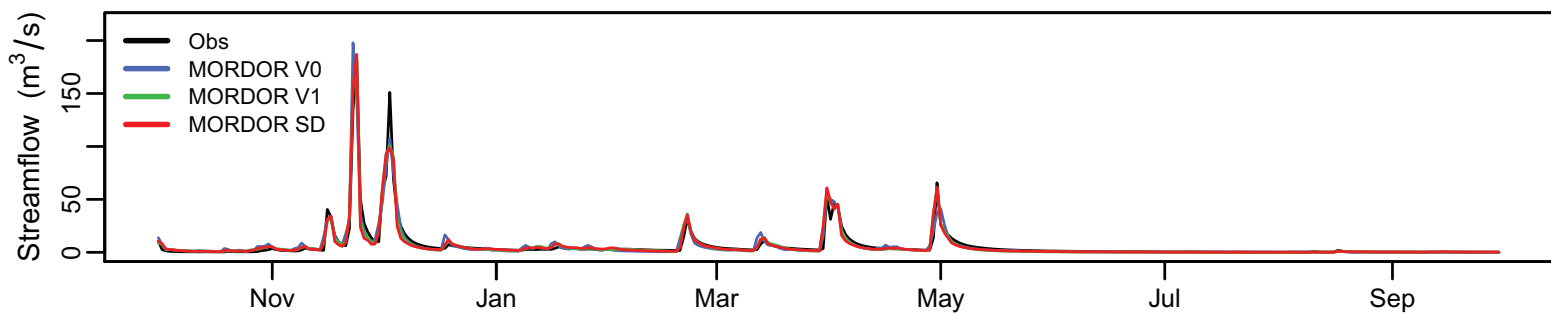

Year 2005

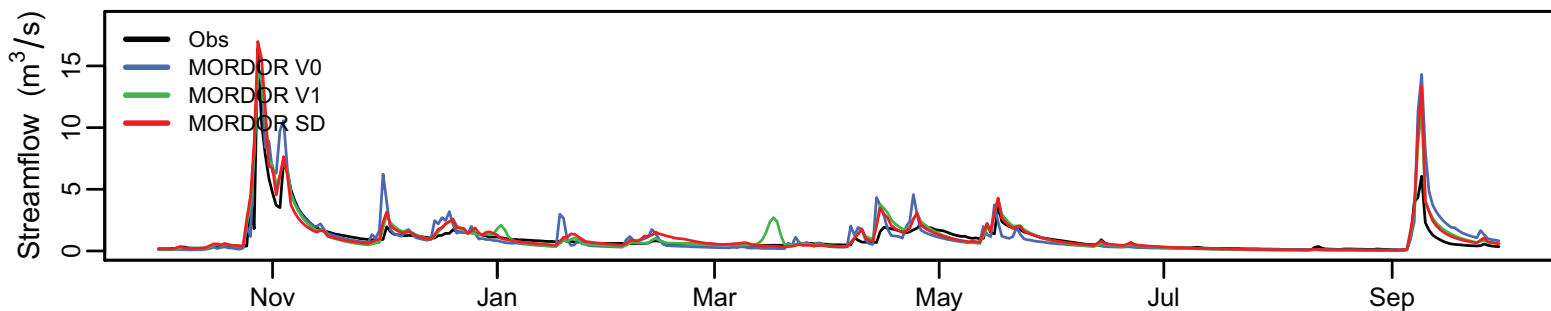

Year 2006

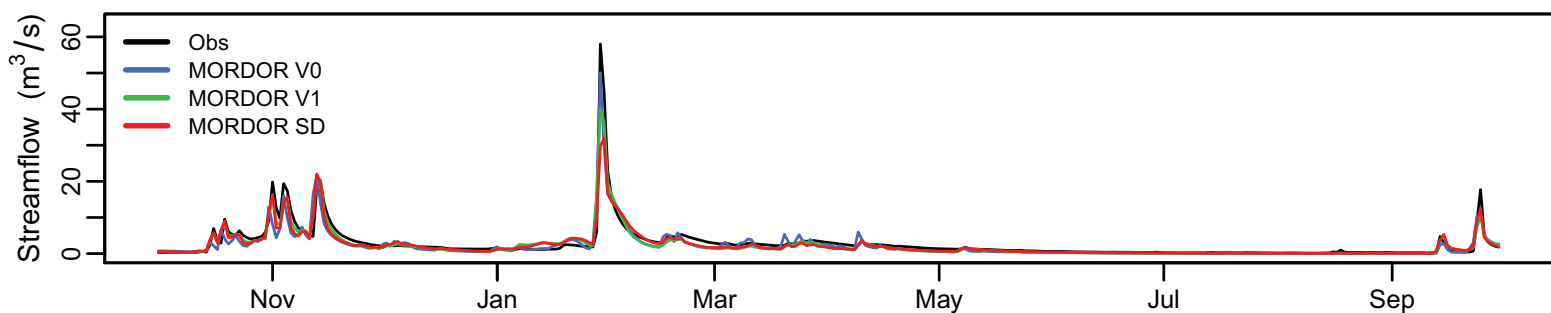

# Montane@Eyrein

Year 1959

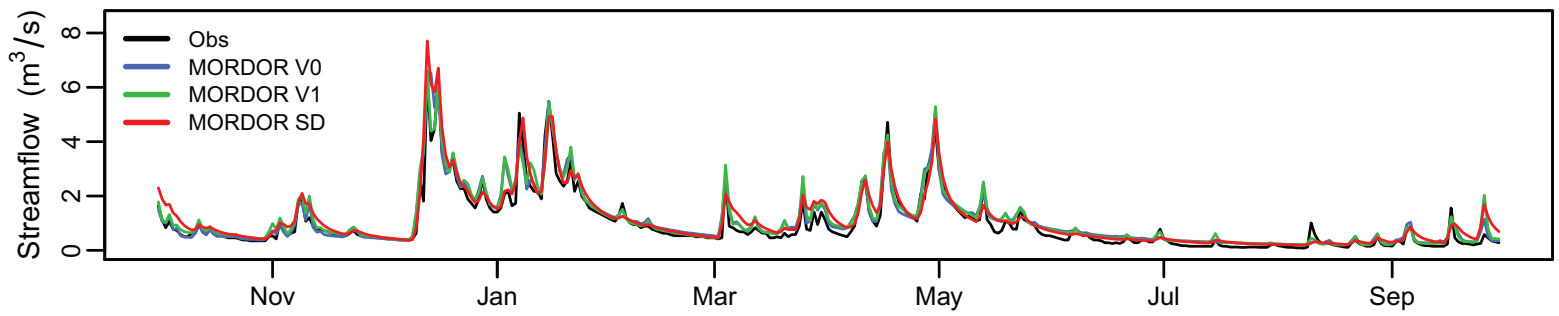

Year 1960

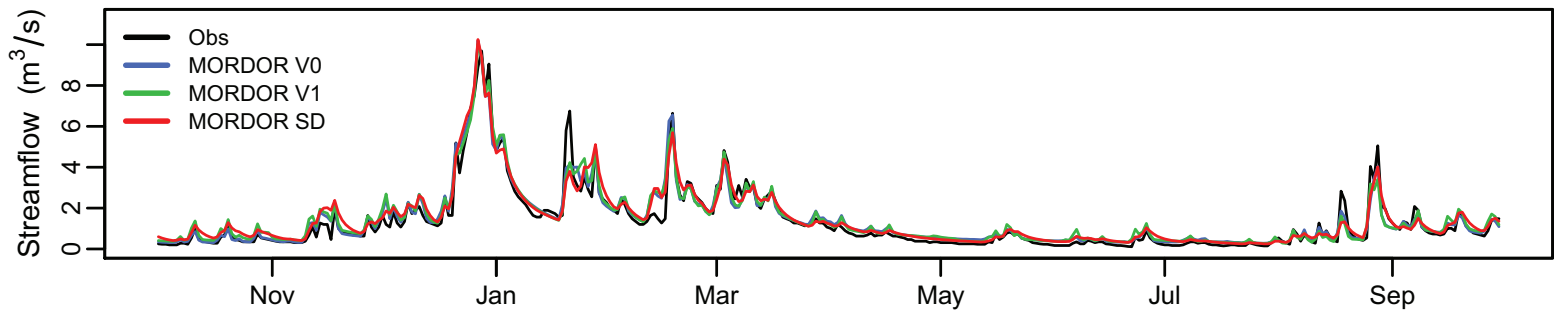

Year 1961

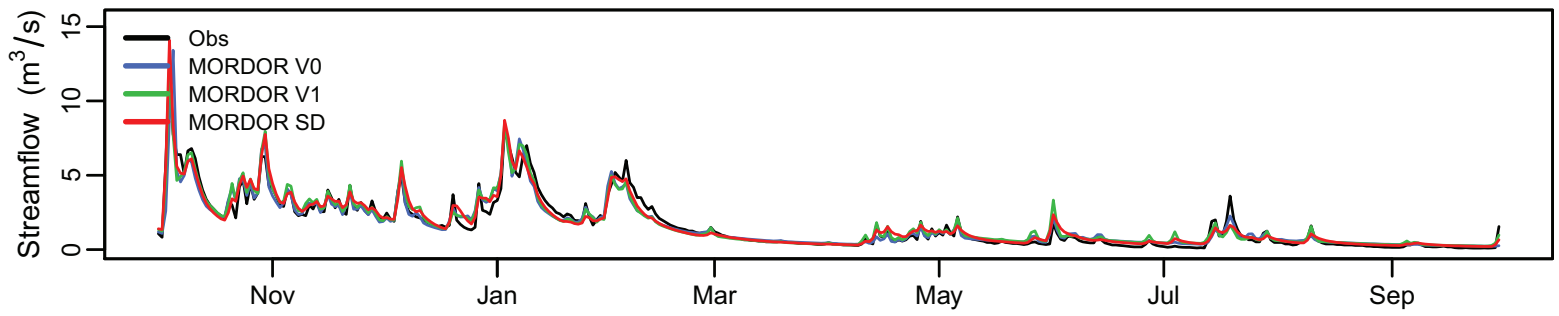

Year 1962

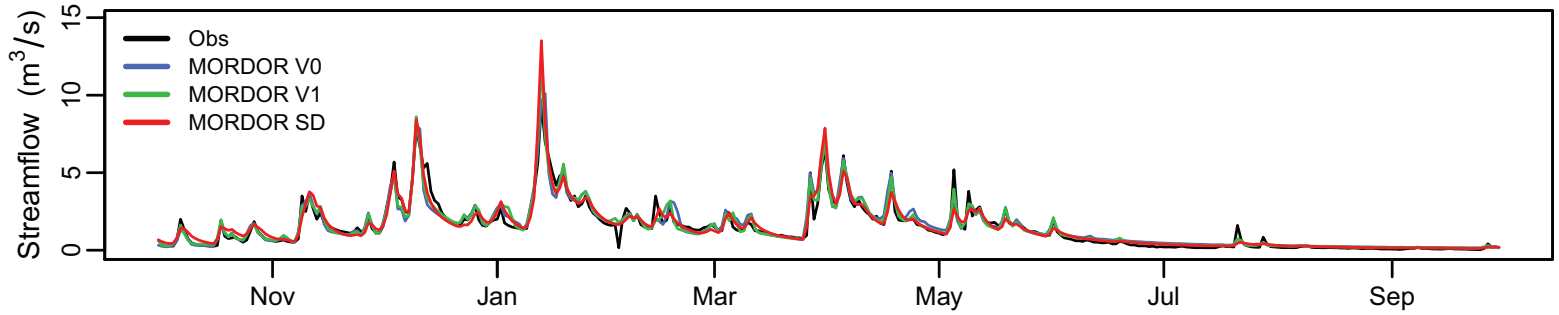

Year 1963

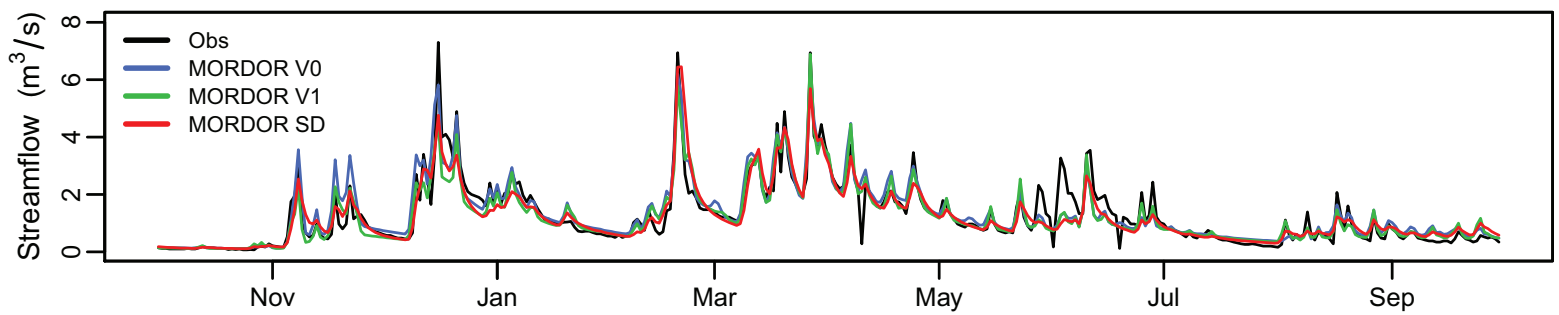

Year 1964

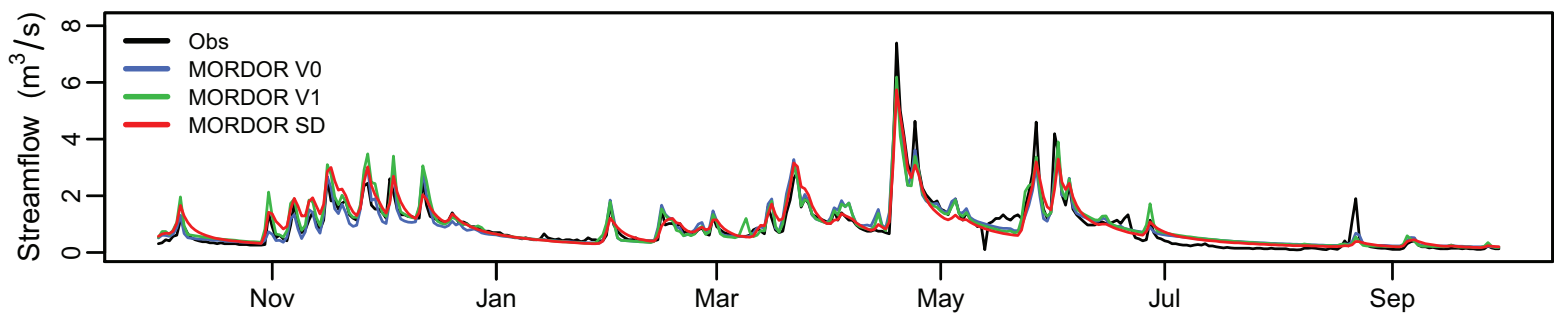



# Montane@Eyrein

Year 1965

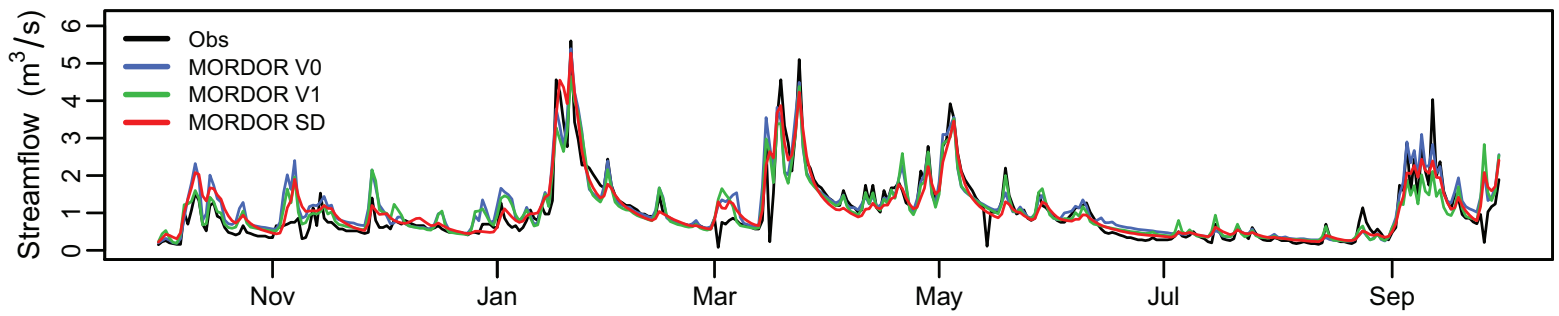

Year 1966

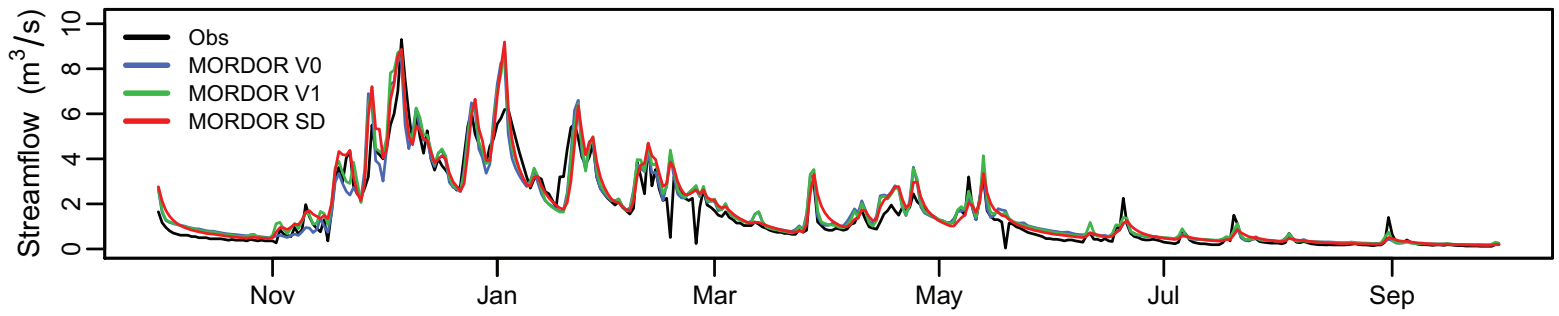

Year 1967

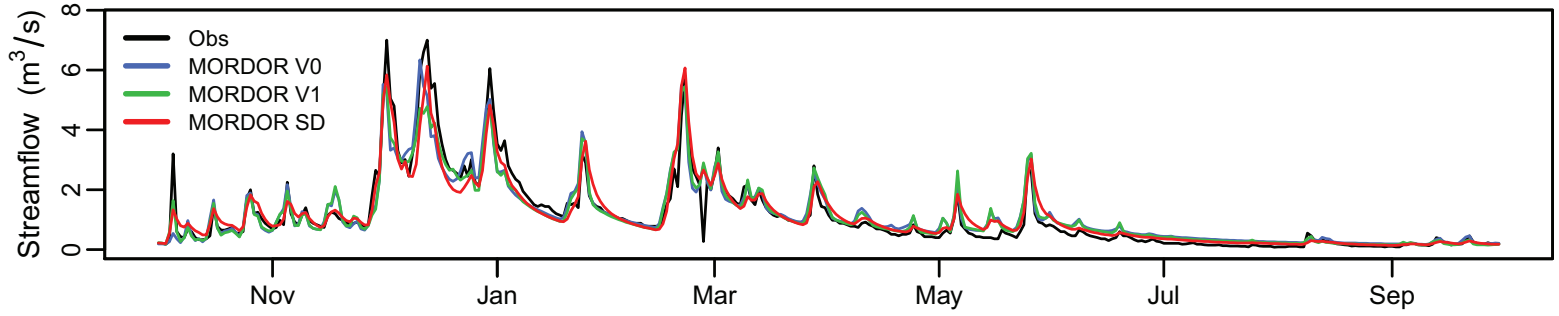

Year 1968

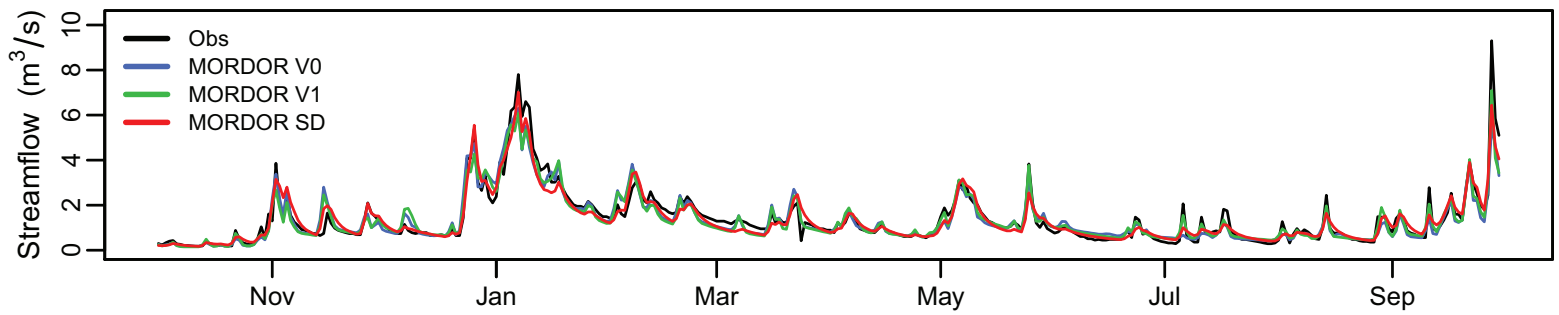

Year 1969

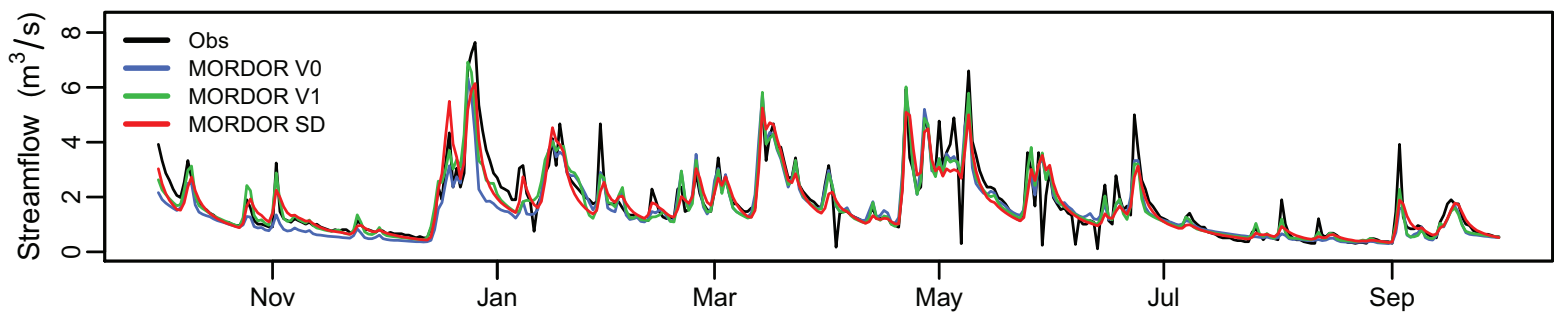

Year 1970

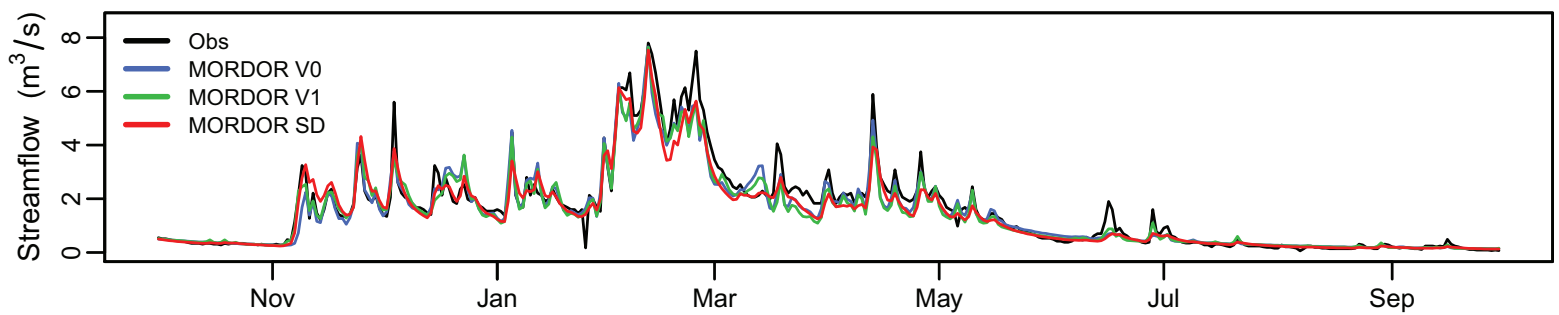

# Montane@Eyrein

Year 1971

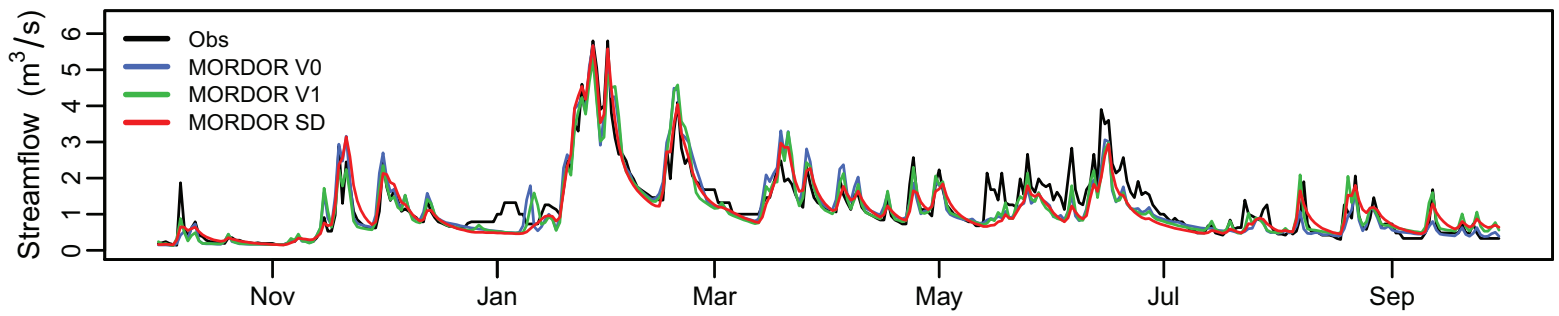

Year 1972

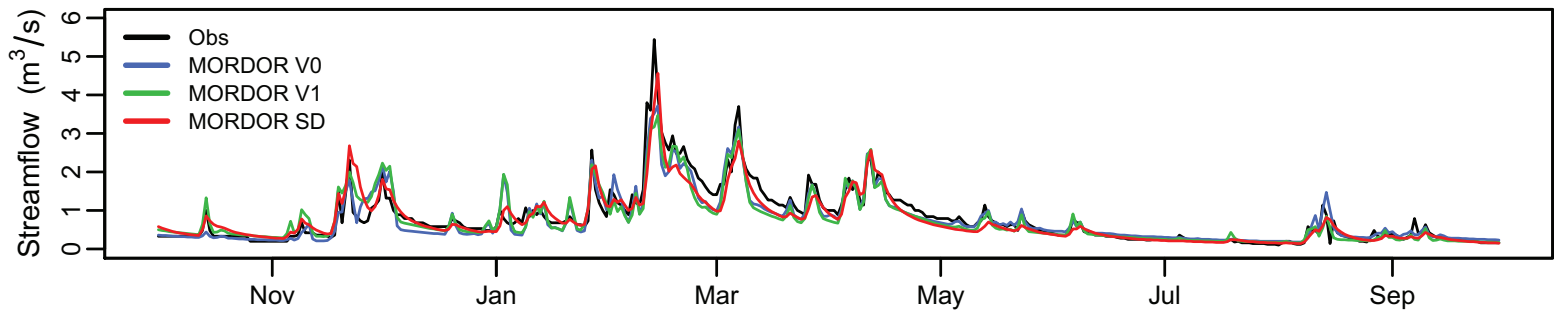

Year 1973

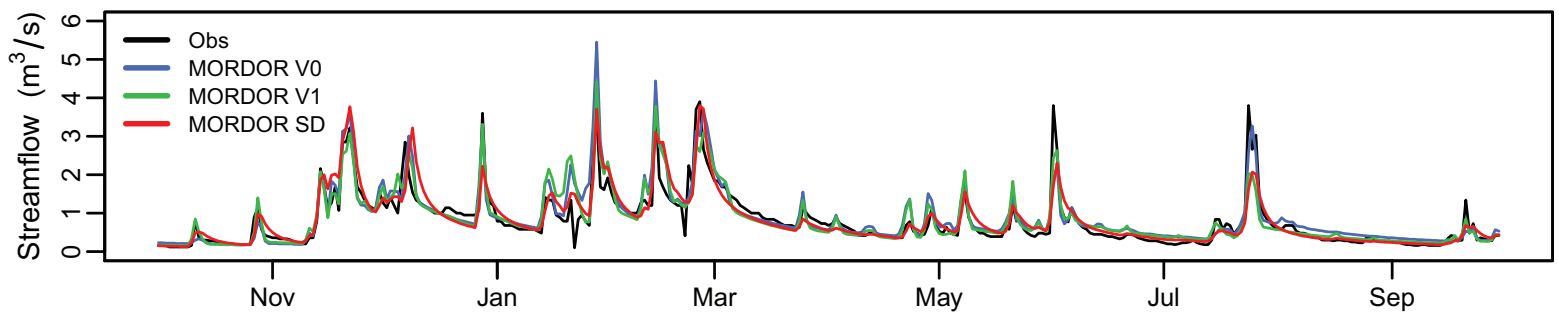

Year 1974

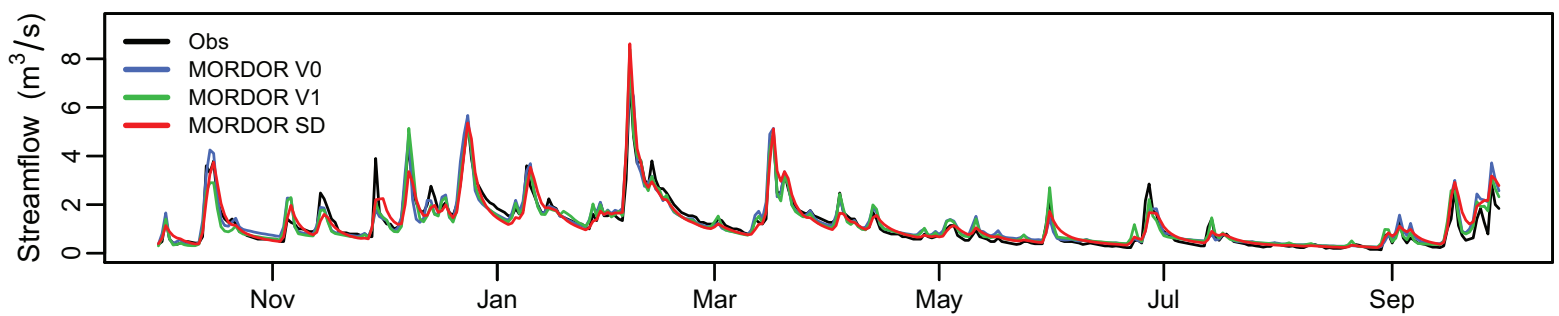

Year 1975

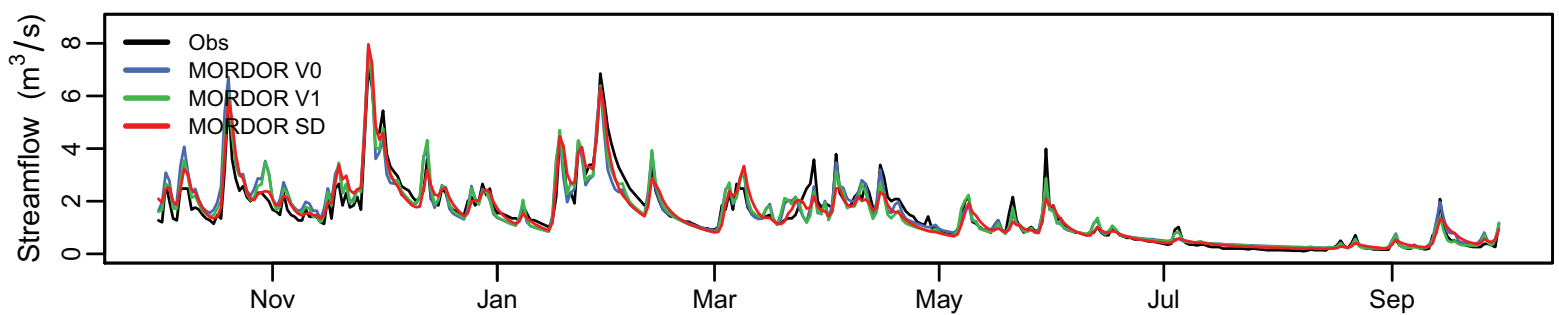

Year 1976

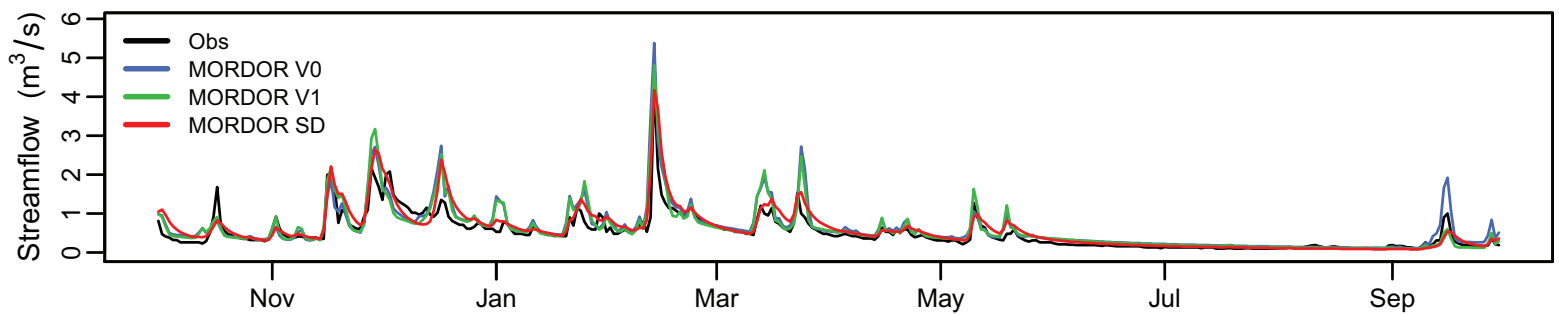

# Montane@Eyrein

Year 1977

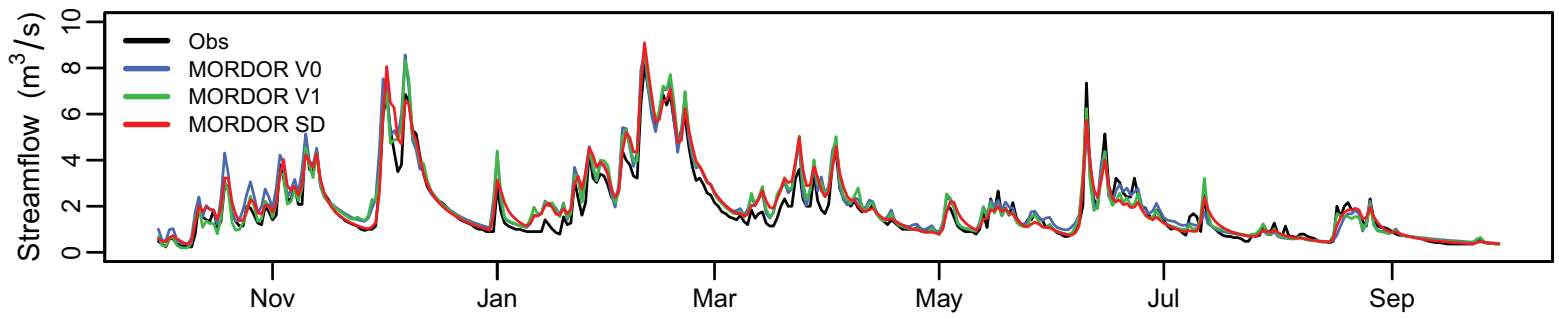

Year 1978

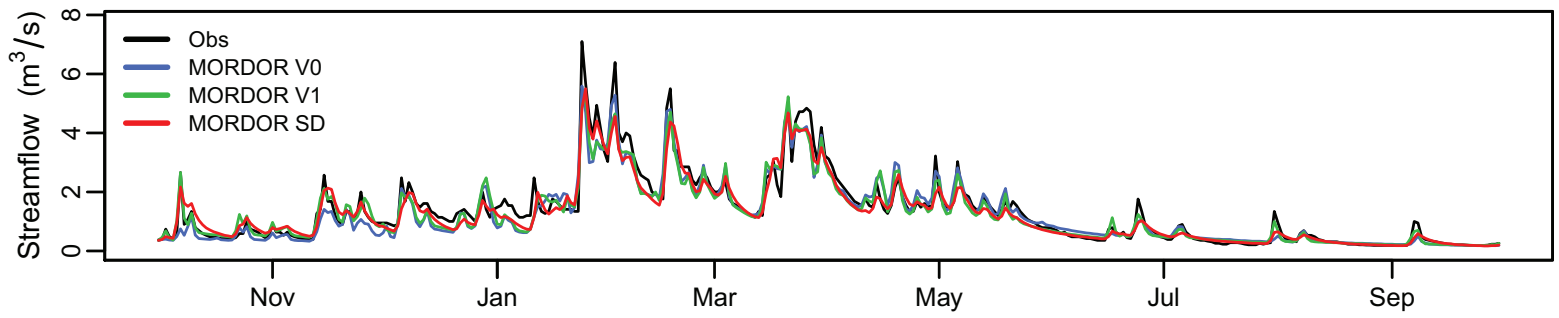

Year 1979

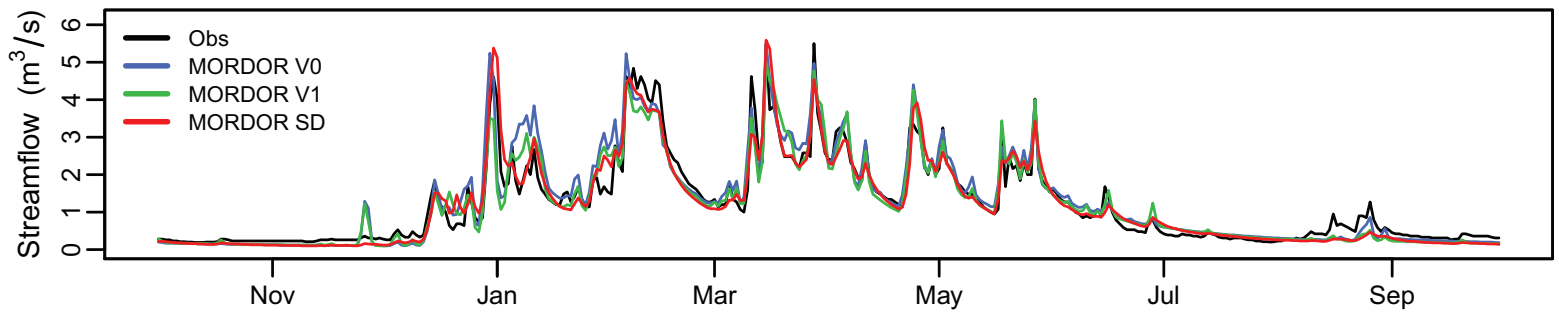

Year 1980

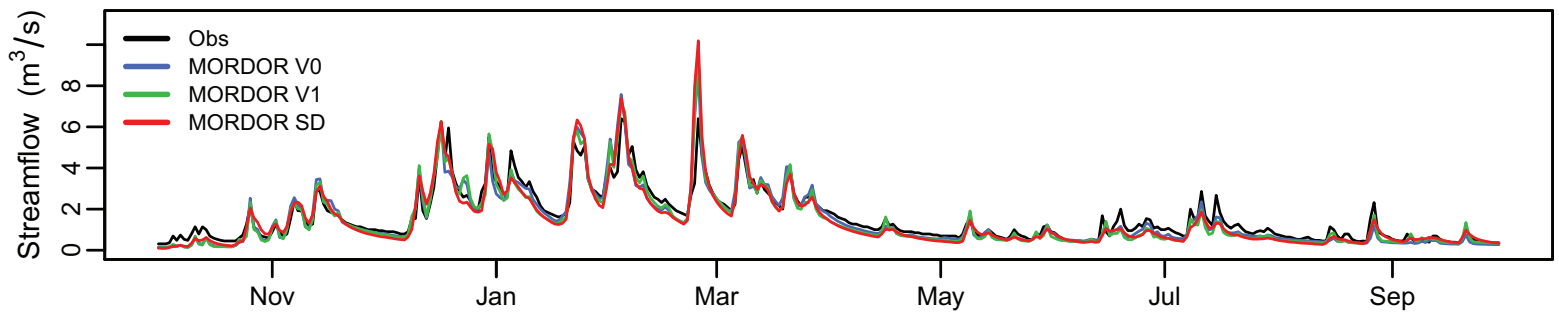

Year 1981

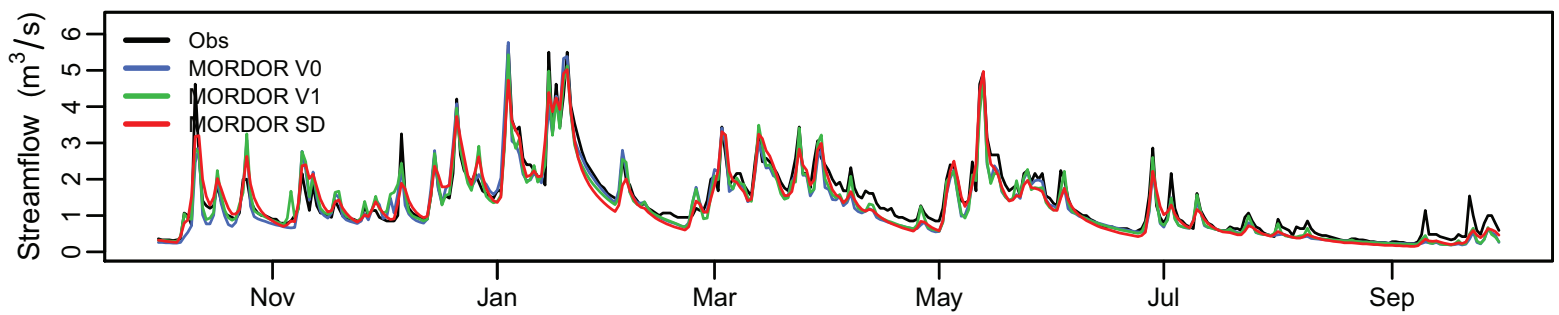

Year 1982

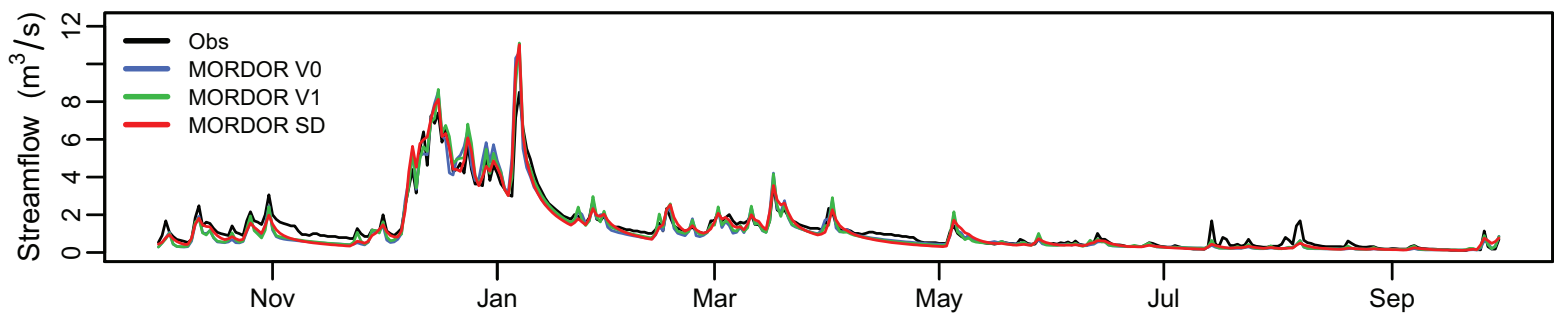

# Montane@Eyrein

Year 1983

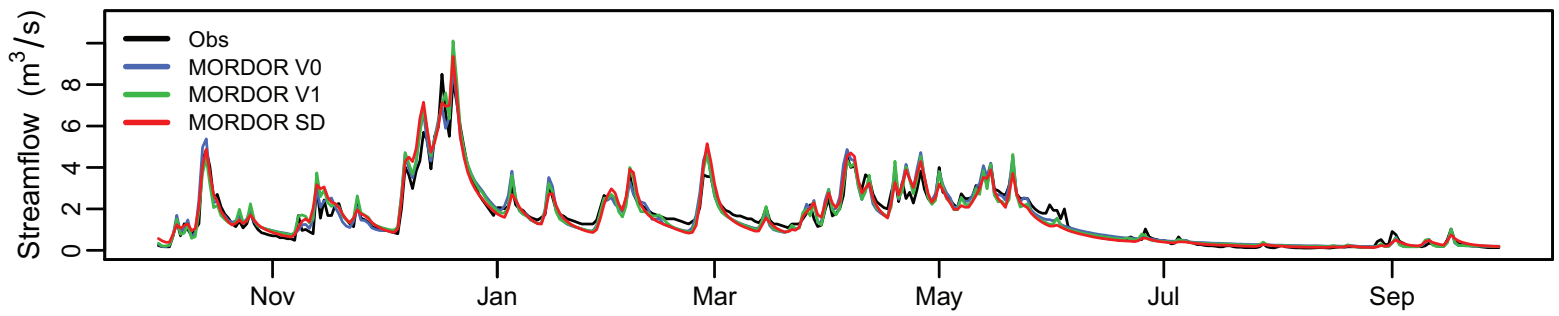

Year 1984

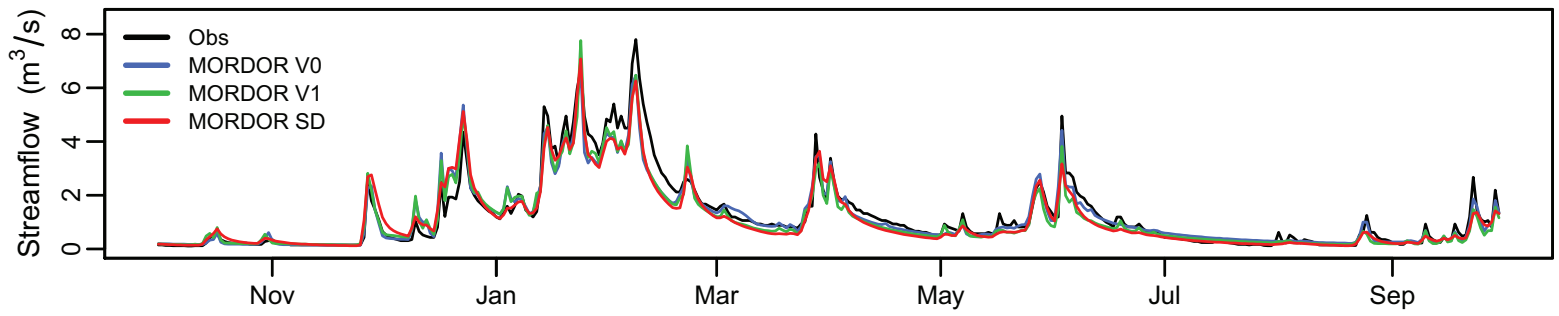

Year 1985

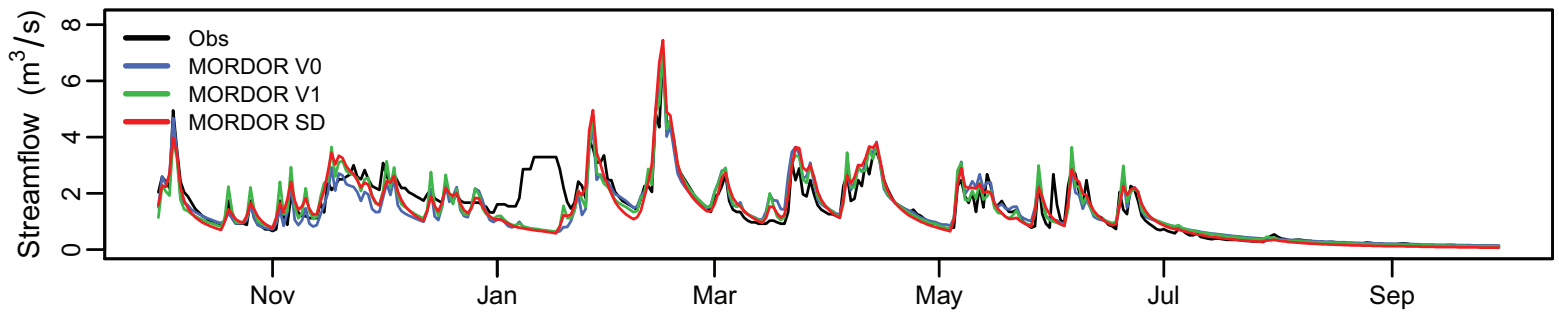

Year 1986

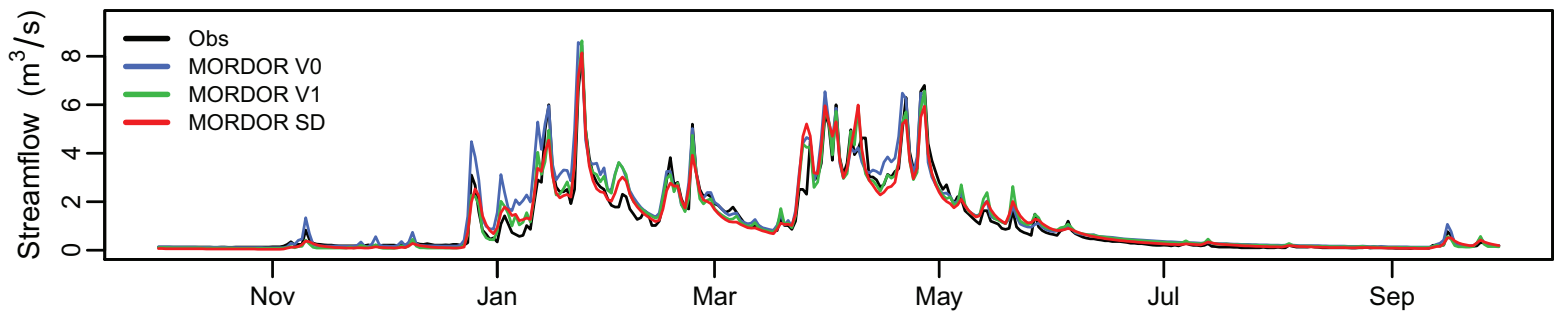

Year 1987

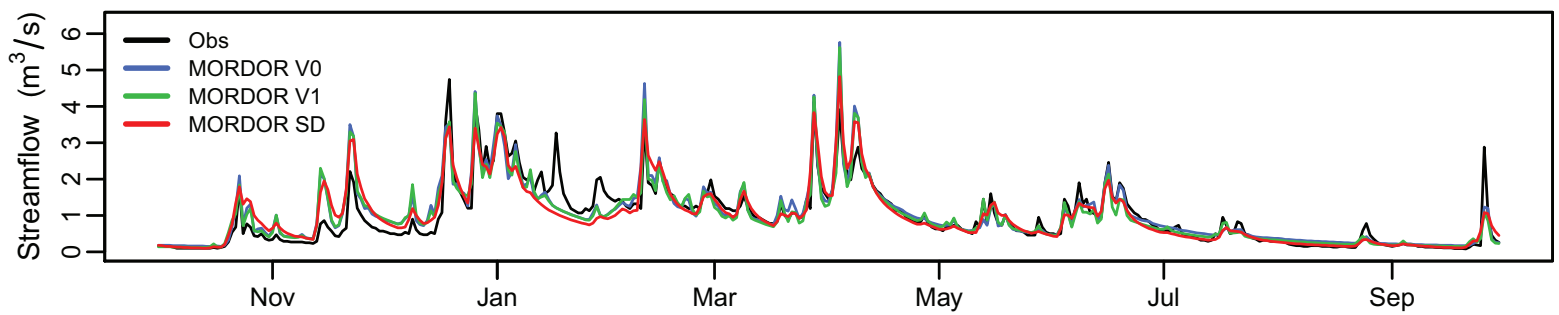

Year 1988

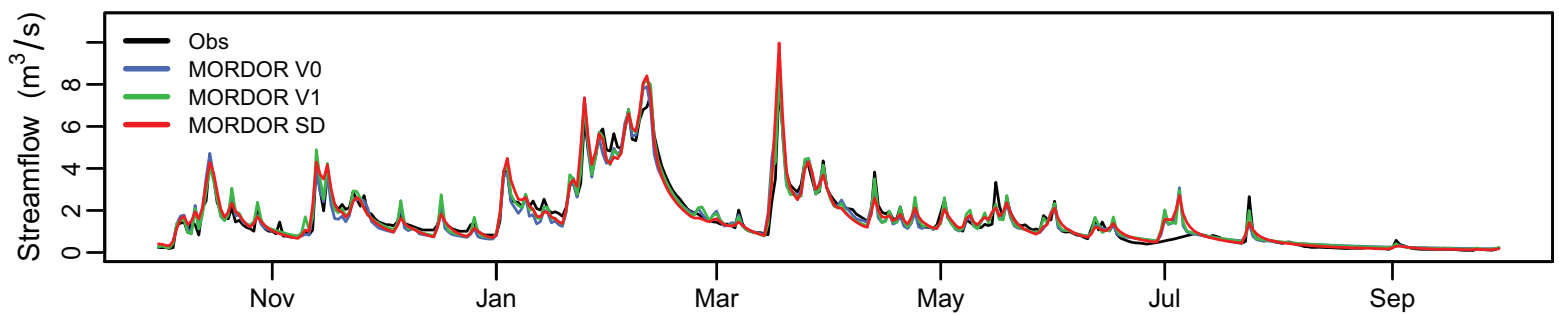

# Montane@Eyrein

Year 1989

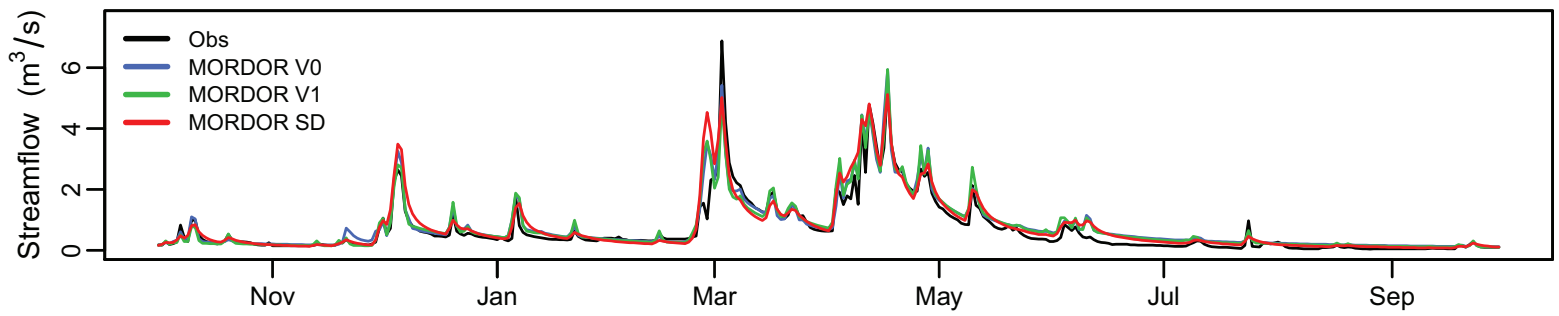

Year 1990

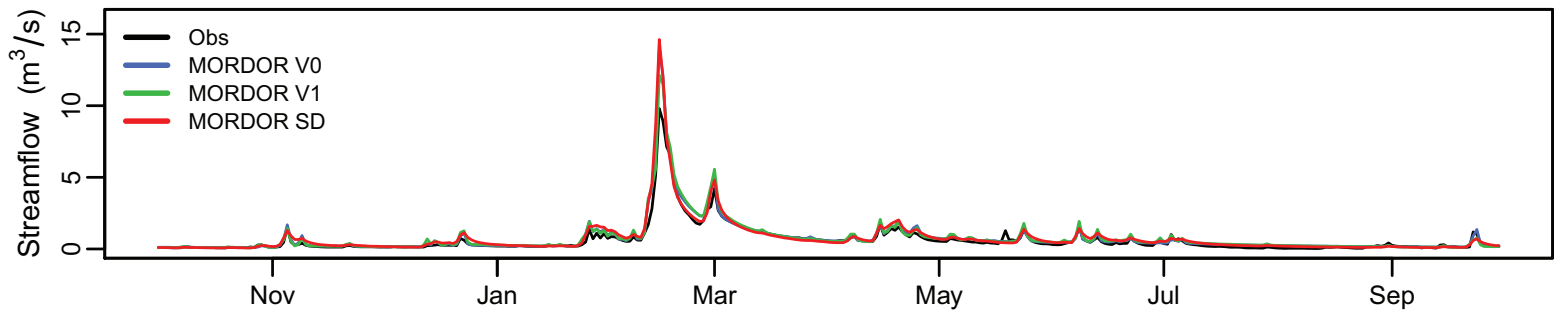

Year 1991

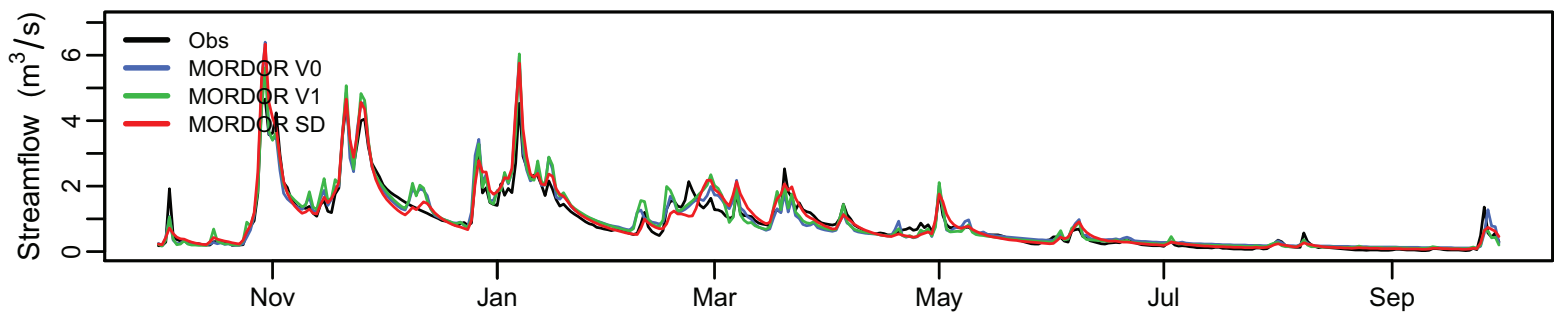

Year 1992

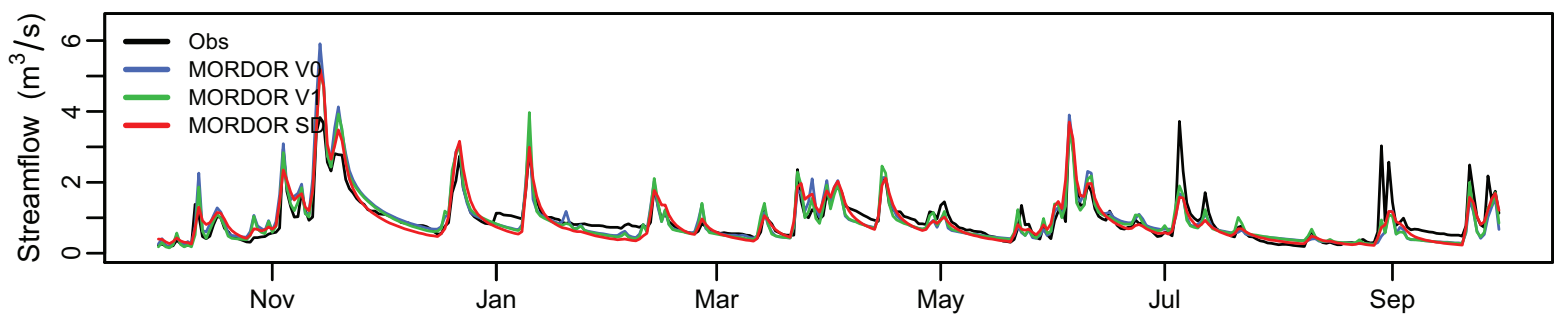

Year 1993

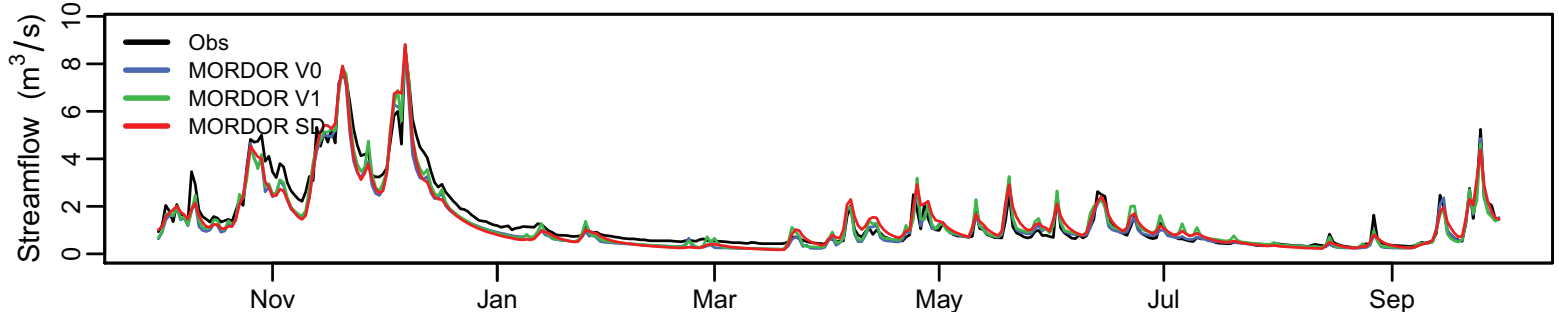

Year 1994

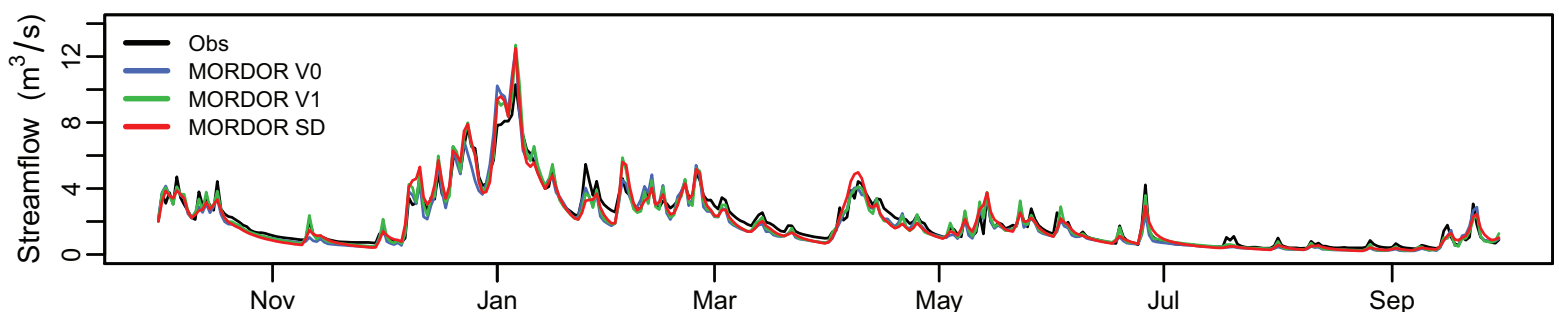

# Montane@Eyrein

Year 1995

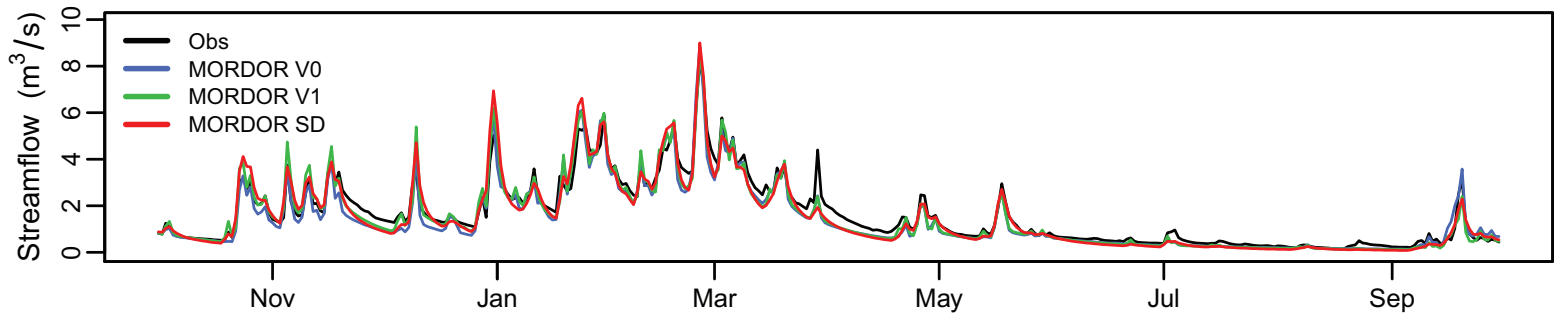

Year 1996

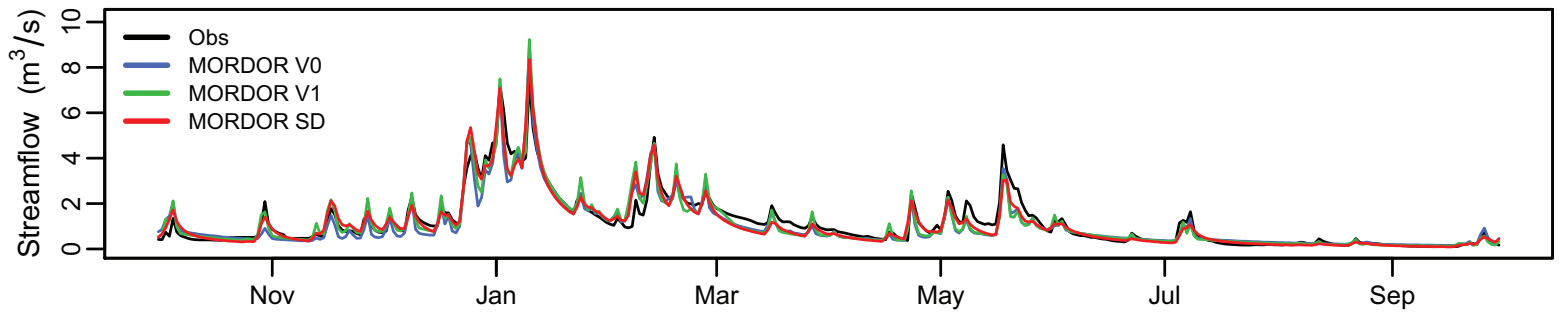

Year 1997

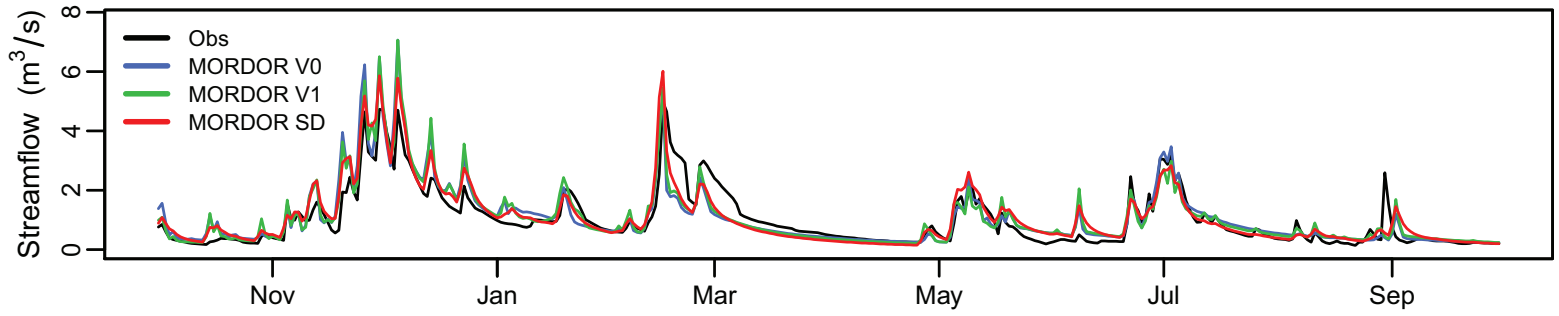

Year 1998

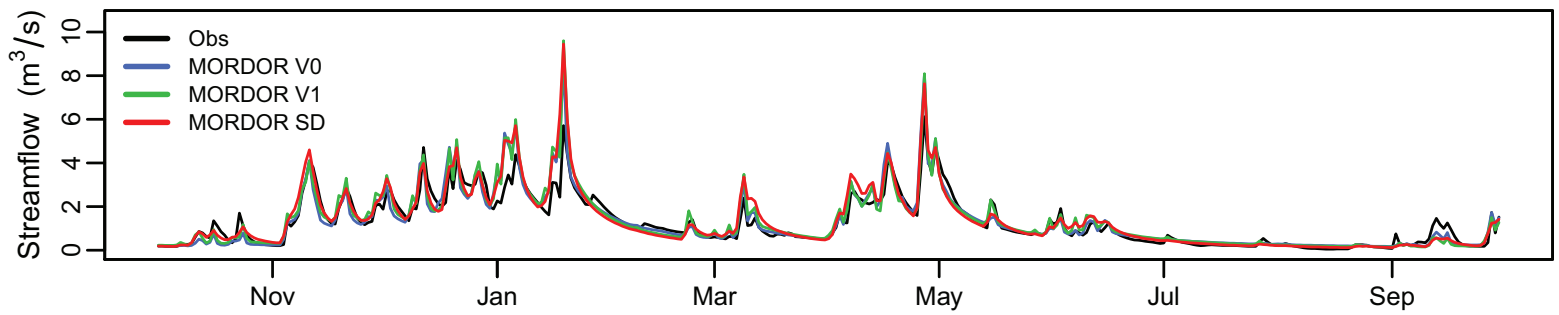

Year 1999

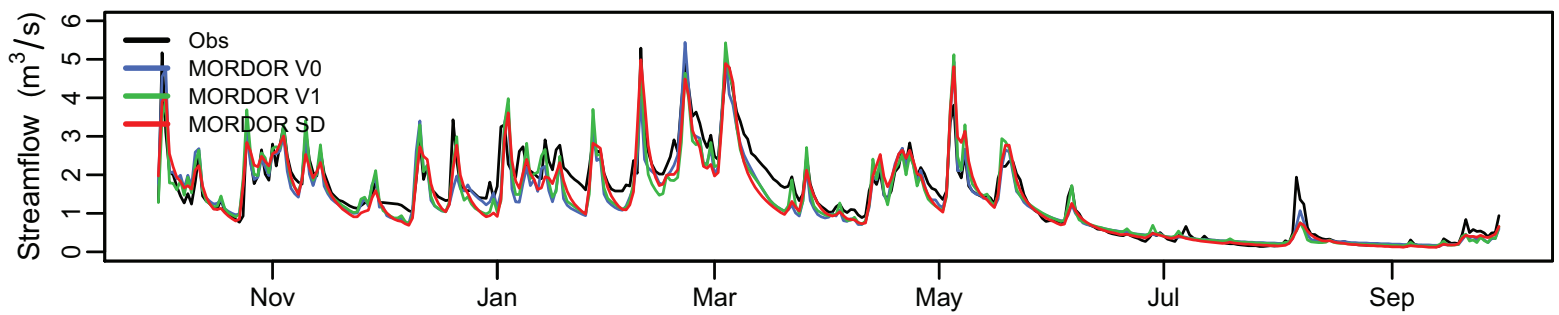

# Oriege@Campauleil

Year 1961

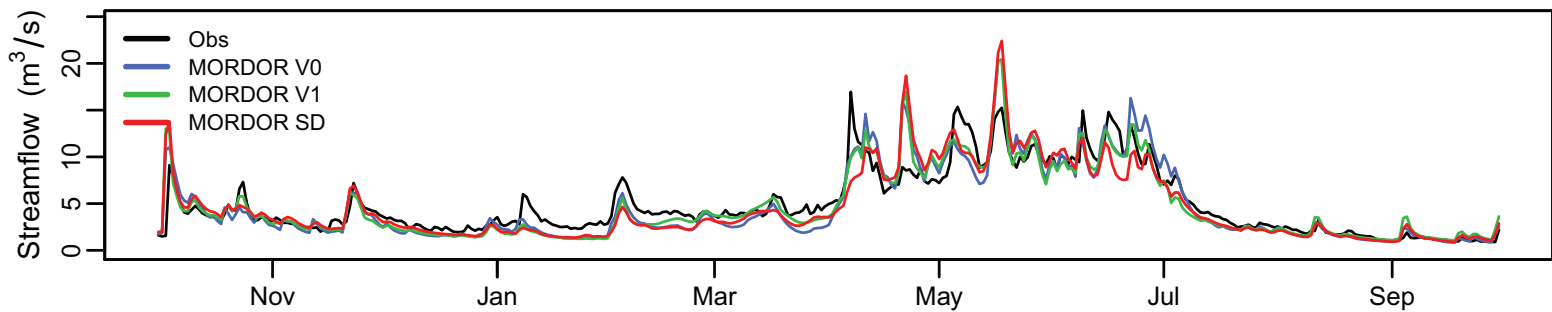

Year 1962

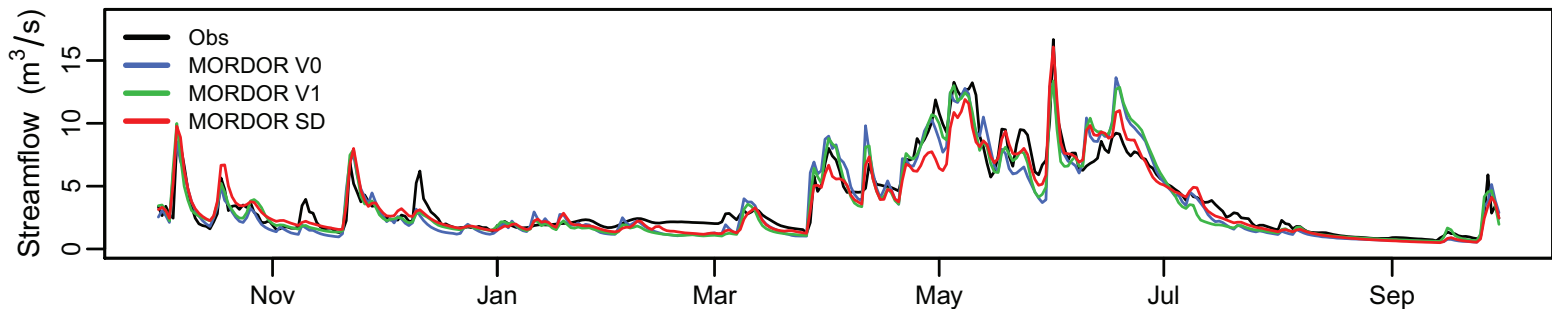

Year 1963

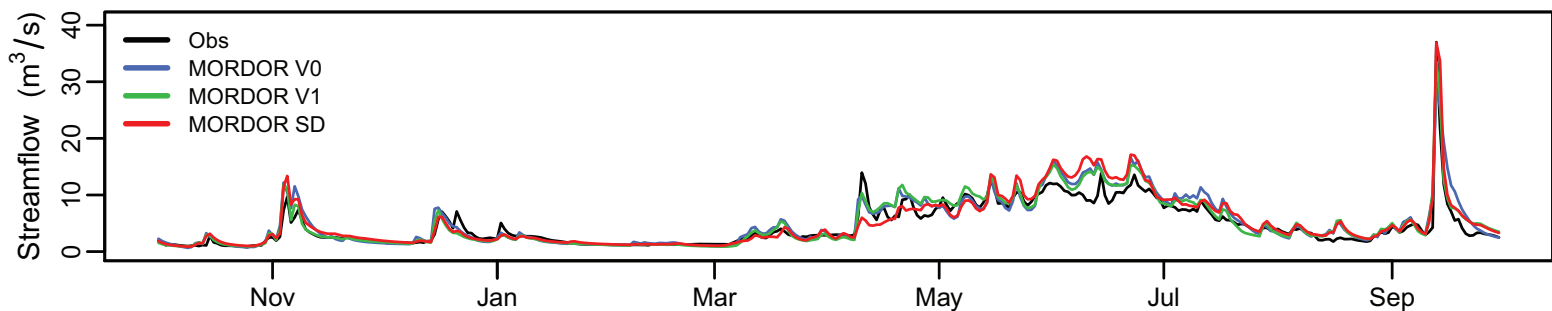

Year 1964

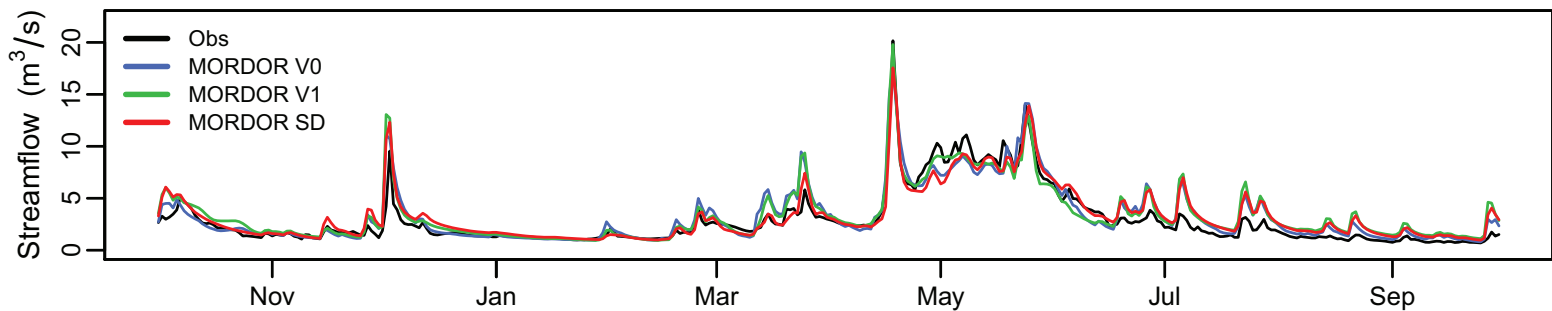

Year 1965

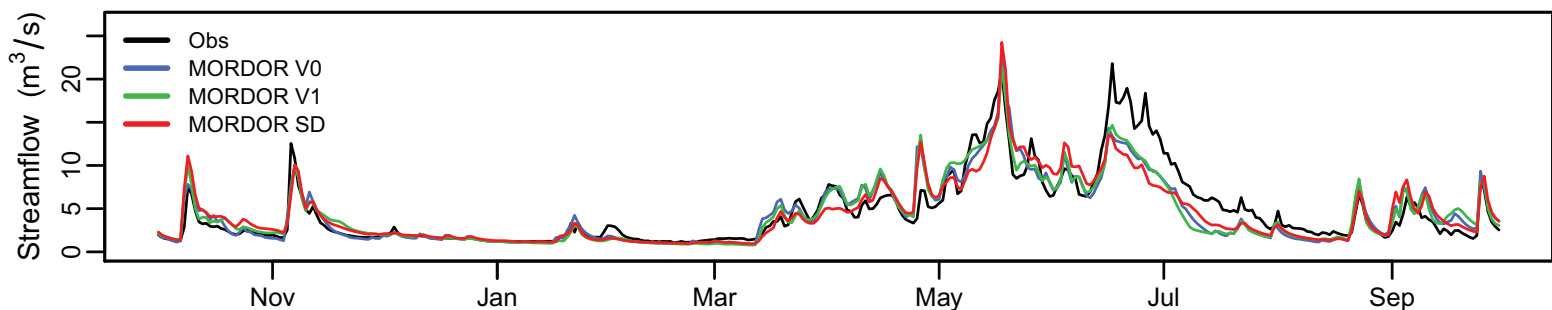

Year 1966

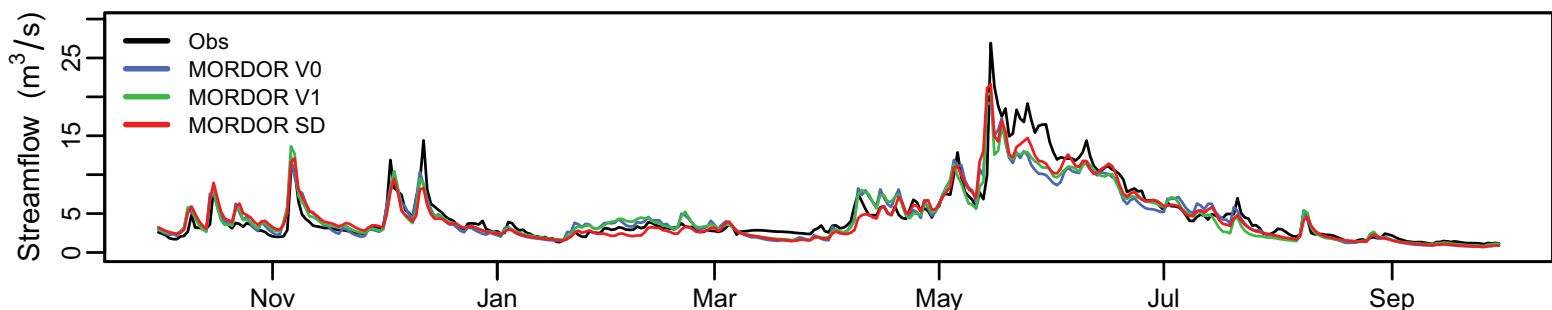

# Oriege@Campauleil

Year 1967

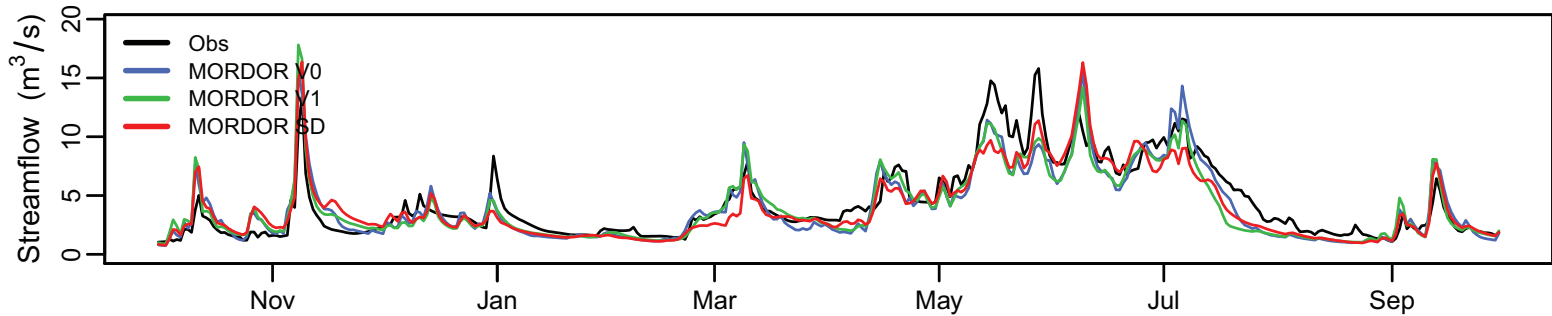

Year 1968

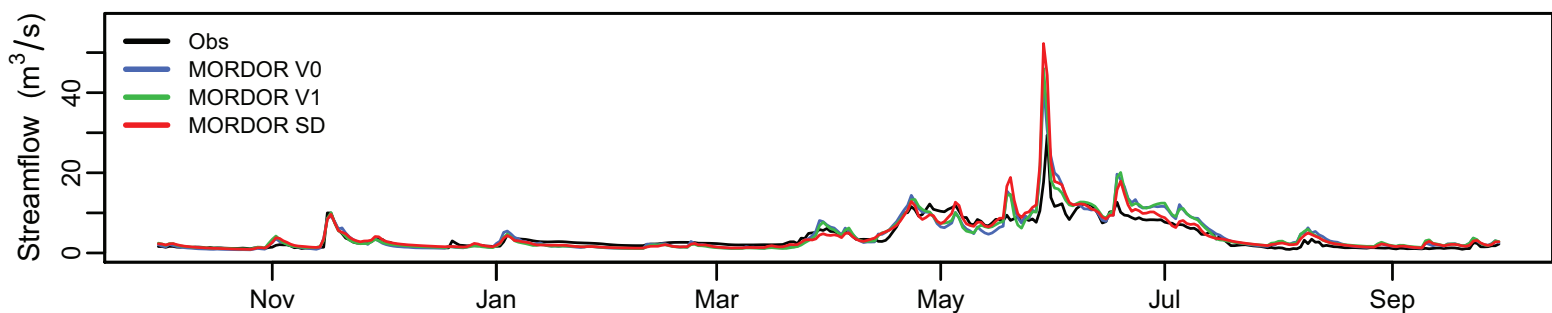

Year 1969

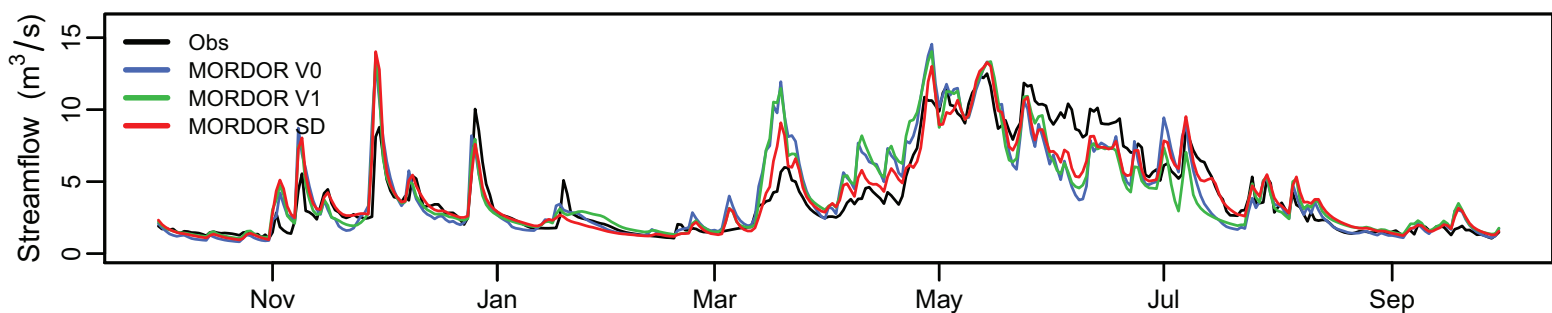

Year 1970

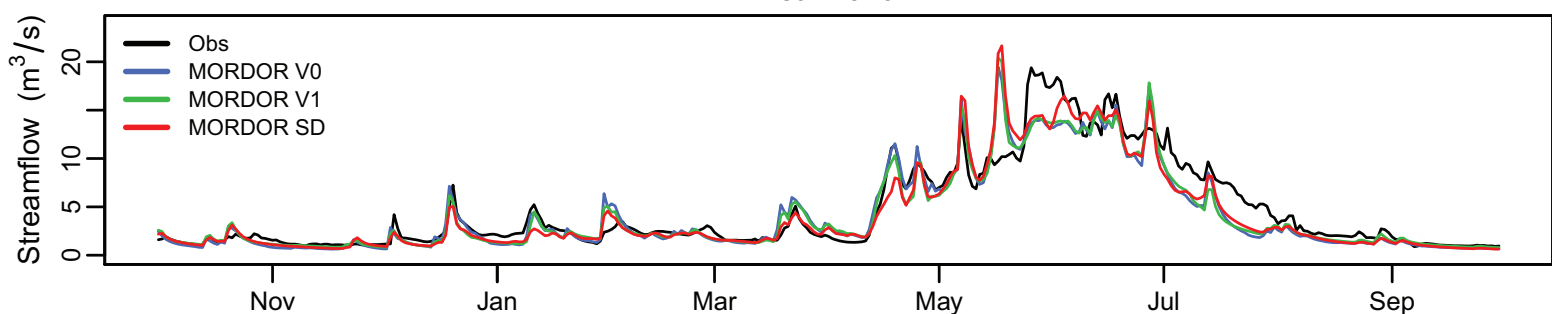

Year 1971

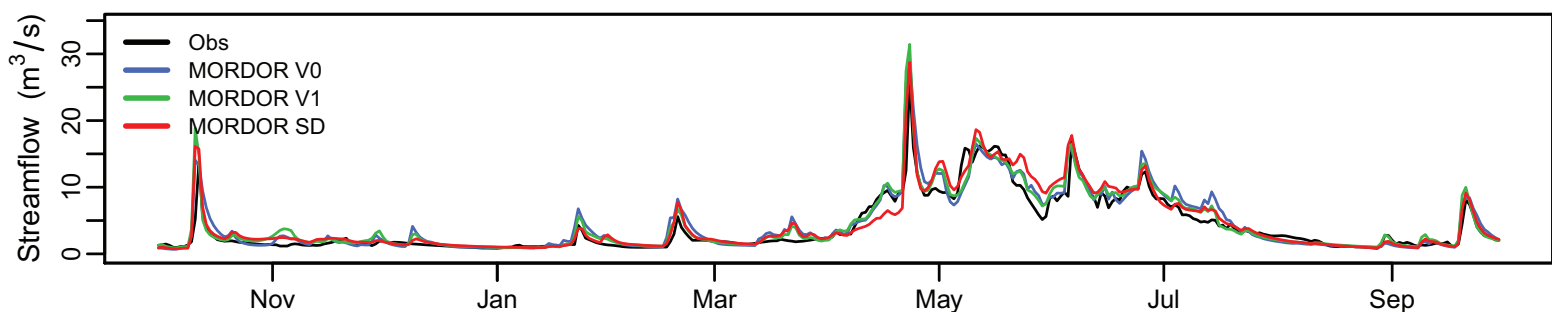

Year 1972

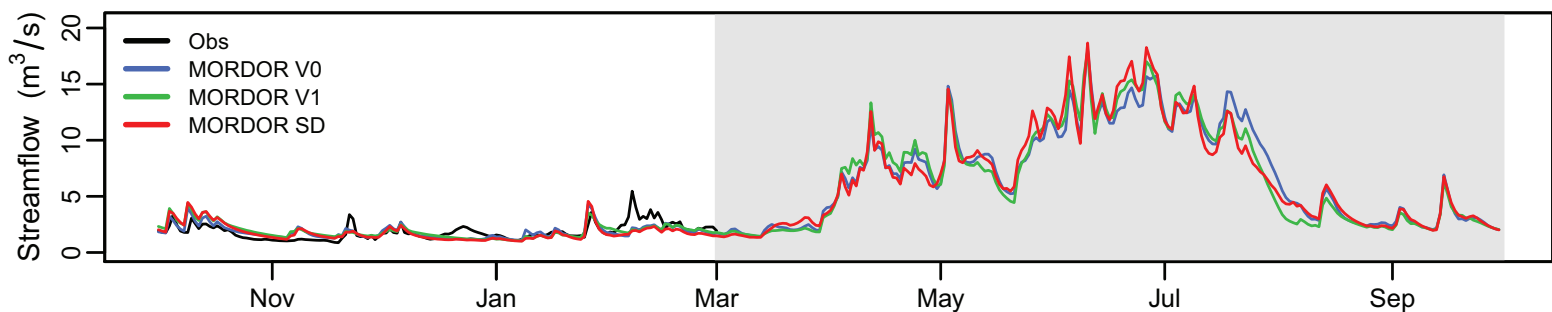



# Oriege@Campauleil

Year 1973

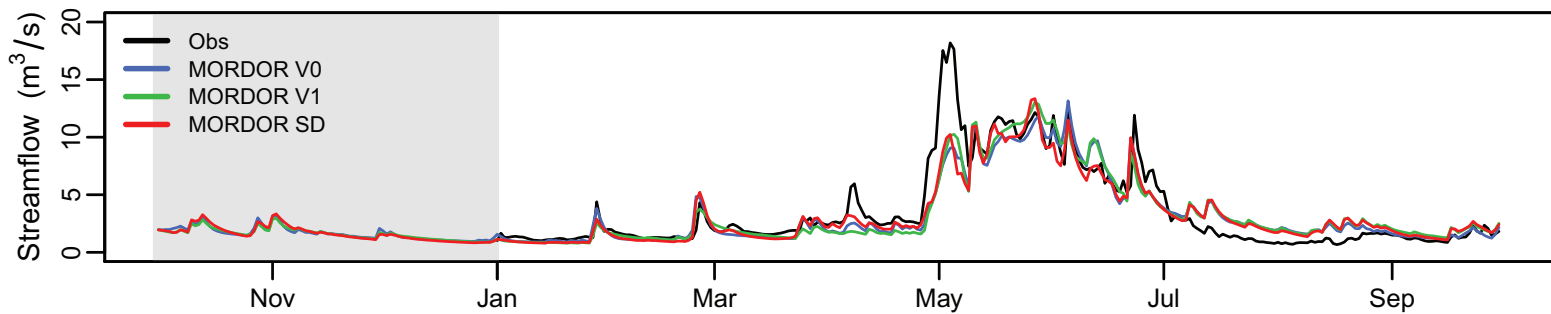

Year 1974

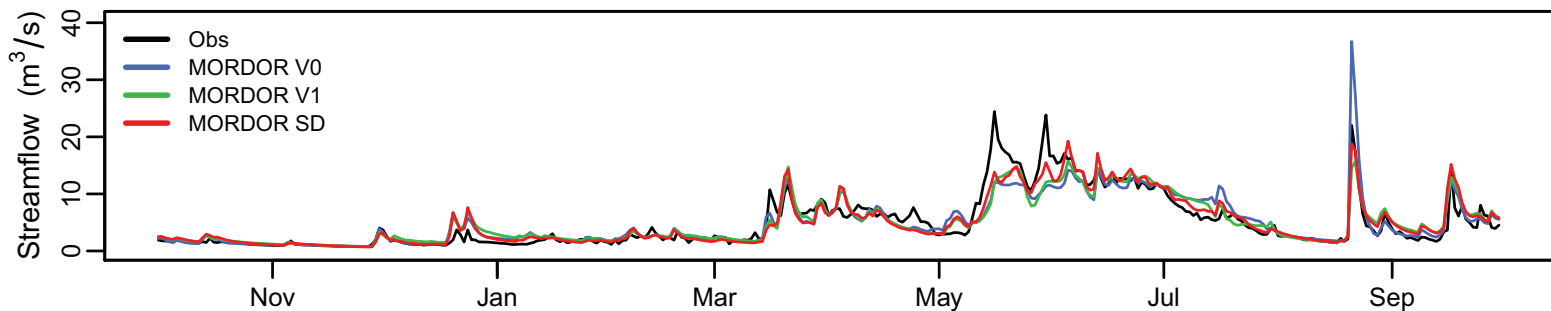

Year 1975

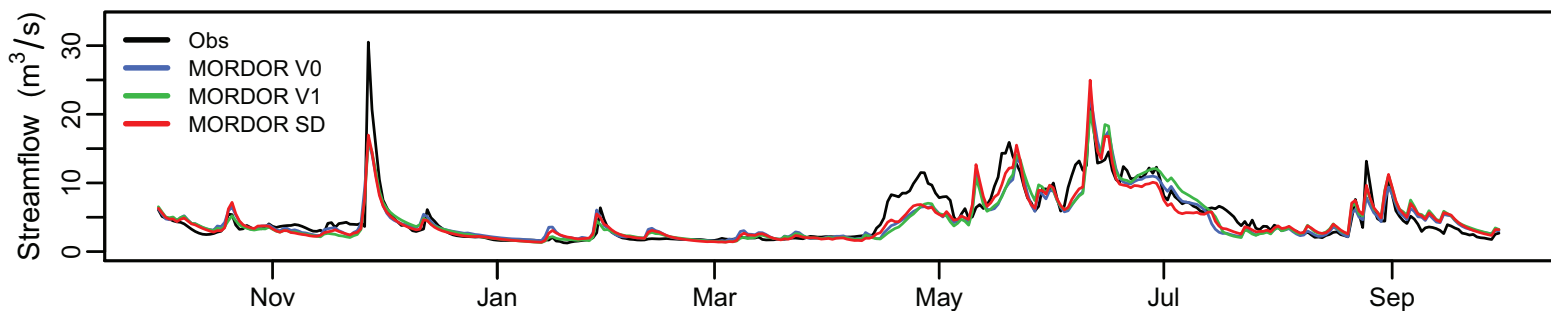

Year 1976

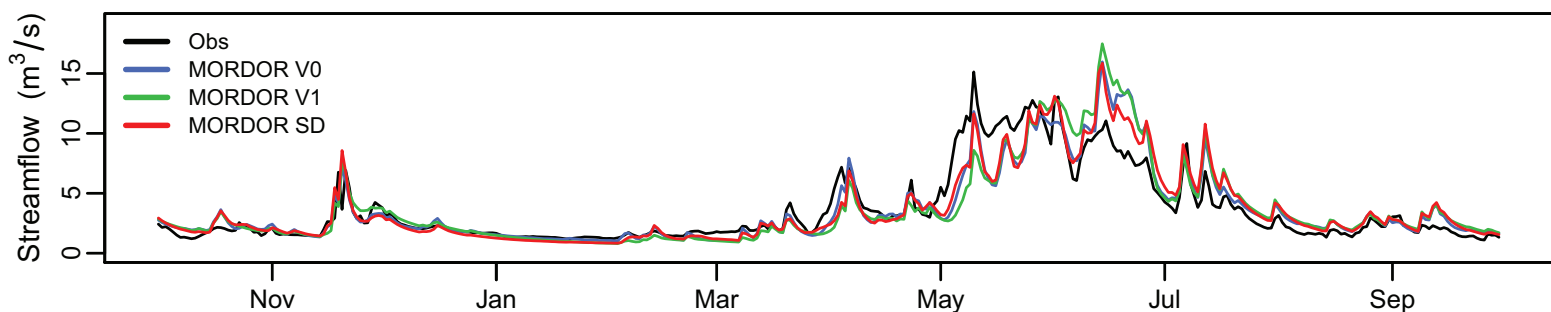

Year 1977

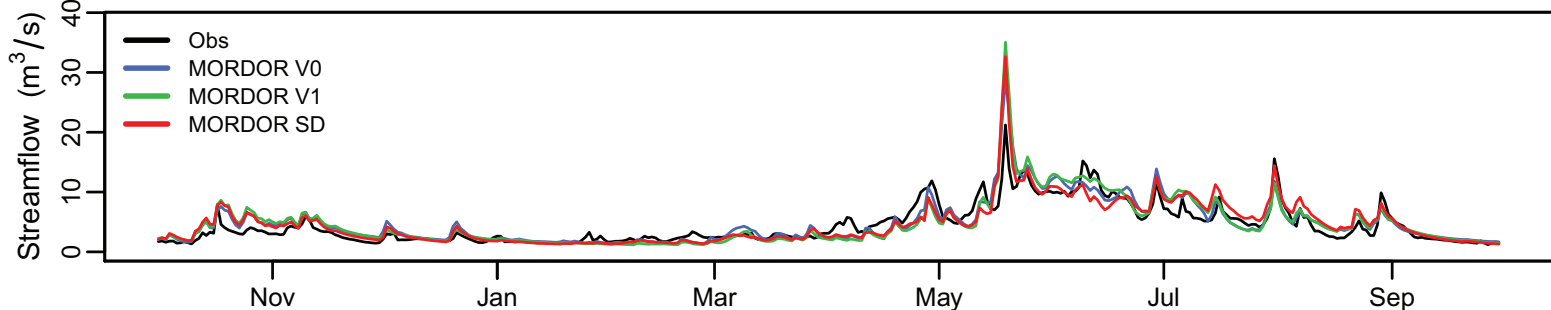

Year 1978

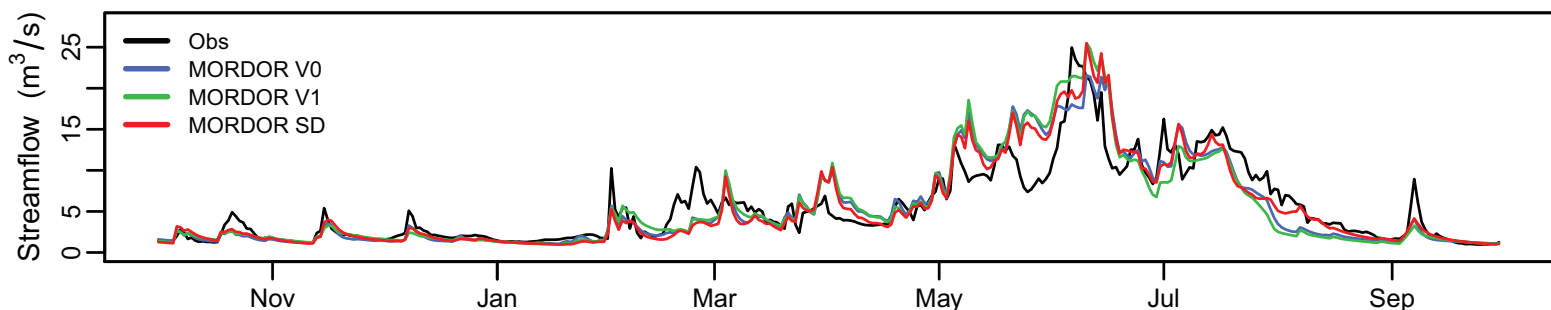

# Oriege@Campauleil

Year 1979

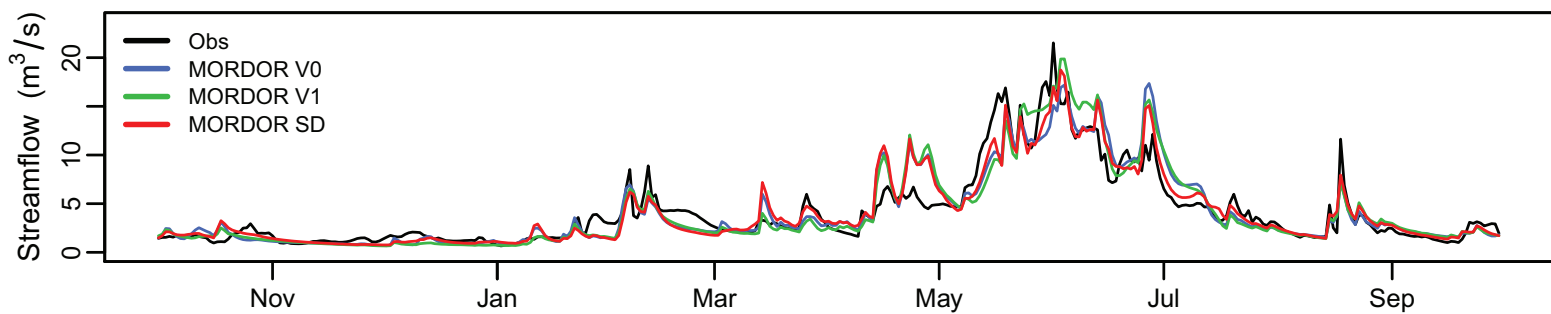

Year 1980

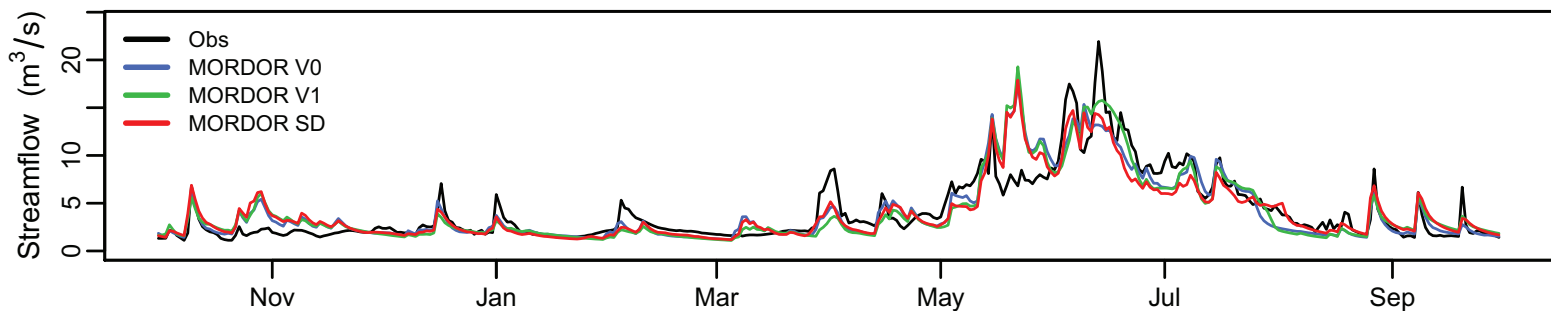

Year 1981

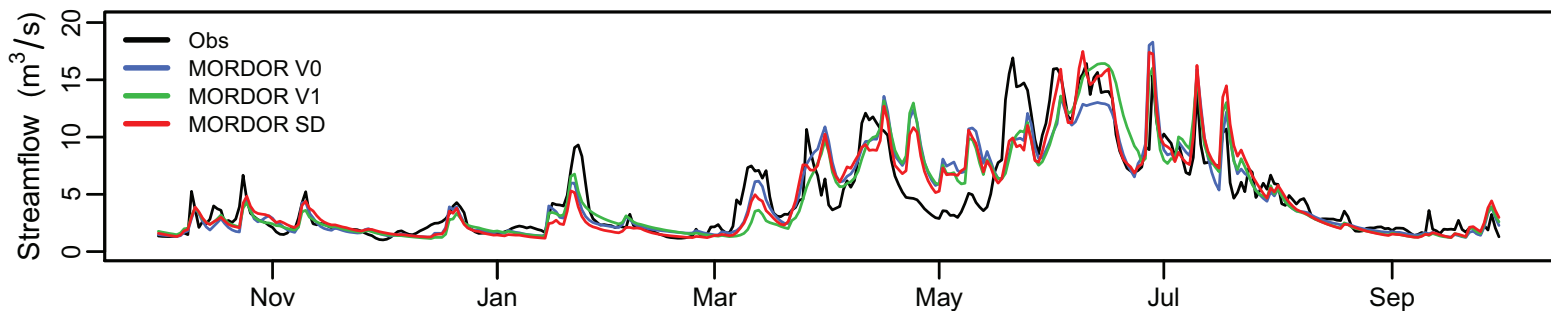

Year 1982

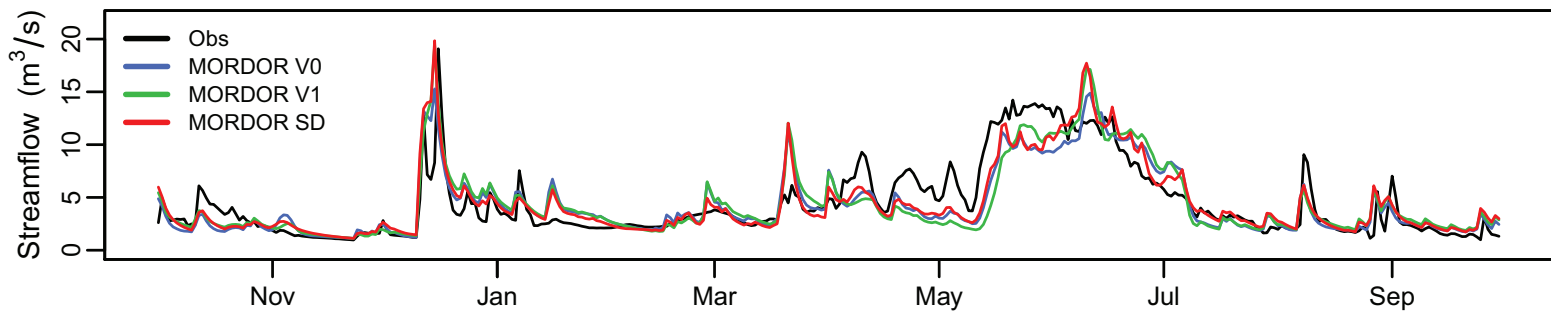

# Ouveze@Bedarrides

Year 1997

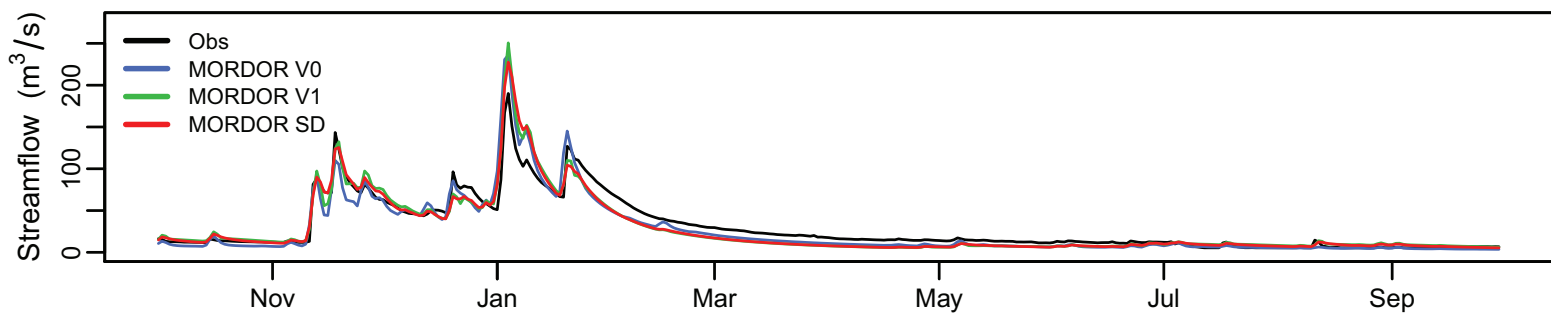

Year 1998

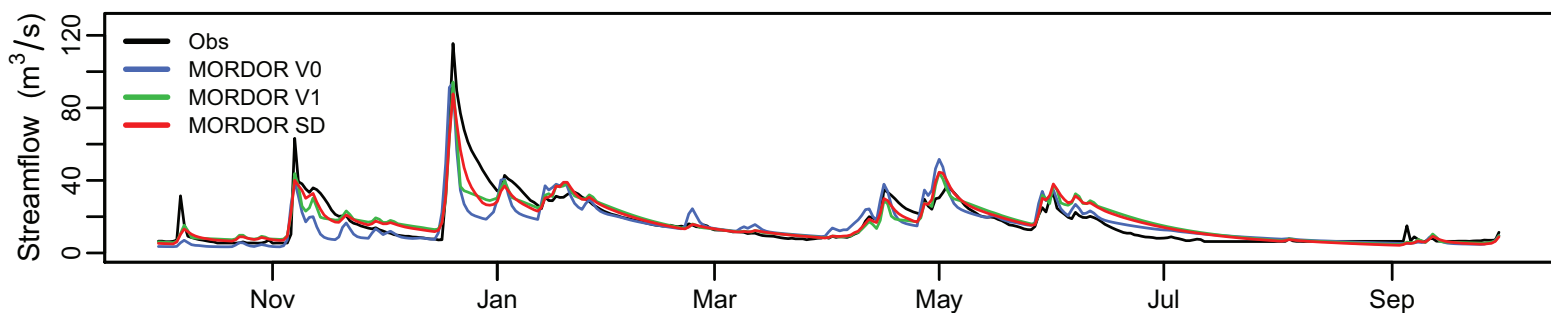

Year 1999

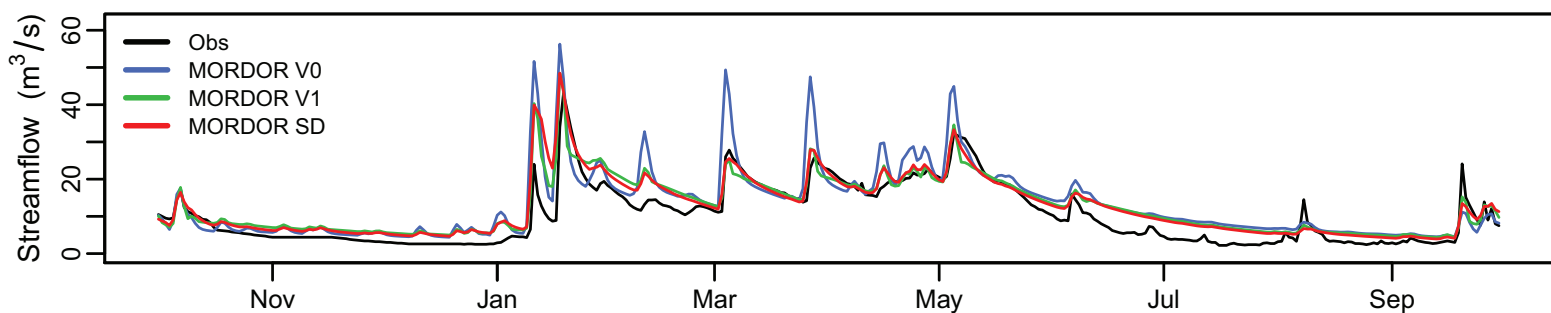

Year 2000

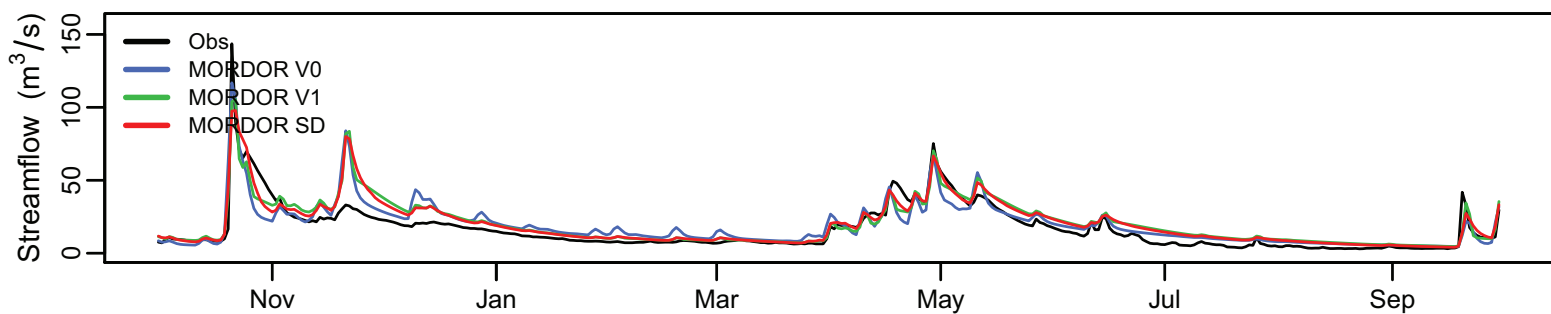

Year 2001

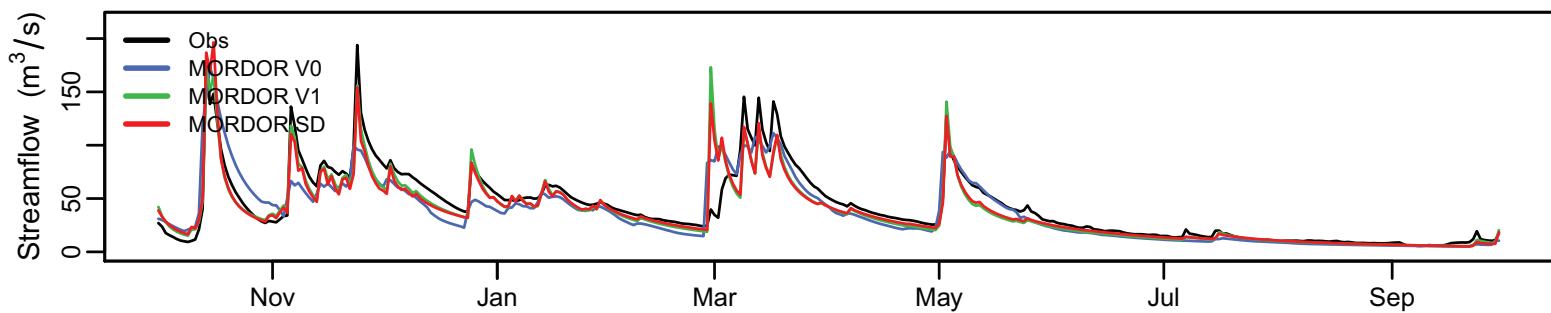

Year 2002

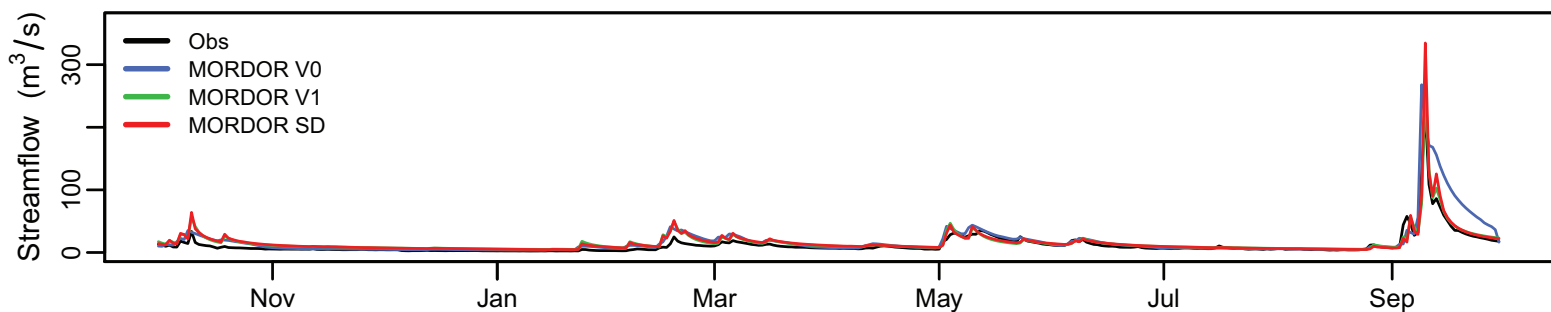

# Ouveze@Bedarrides

Year 2003

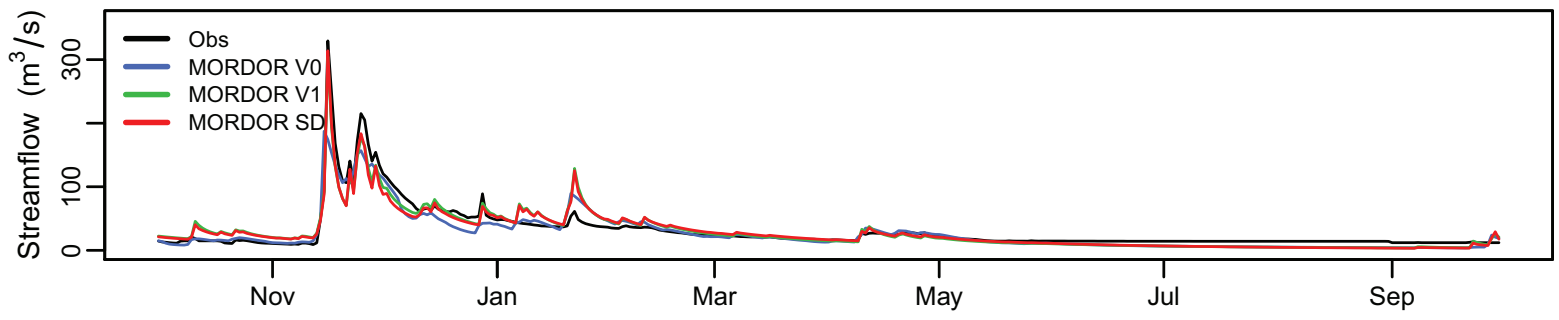

Year 2004

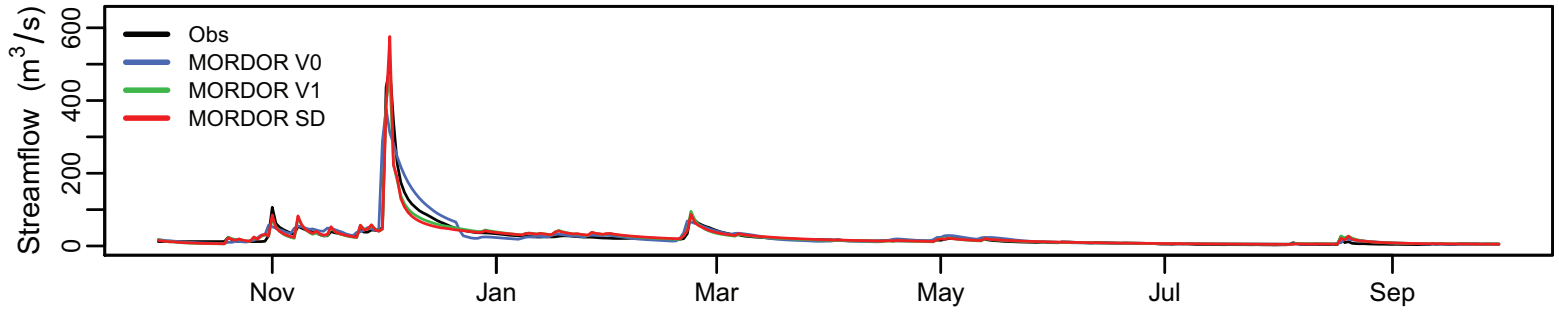

# Rizzanese@Barrage

Year 1994

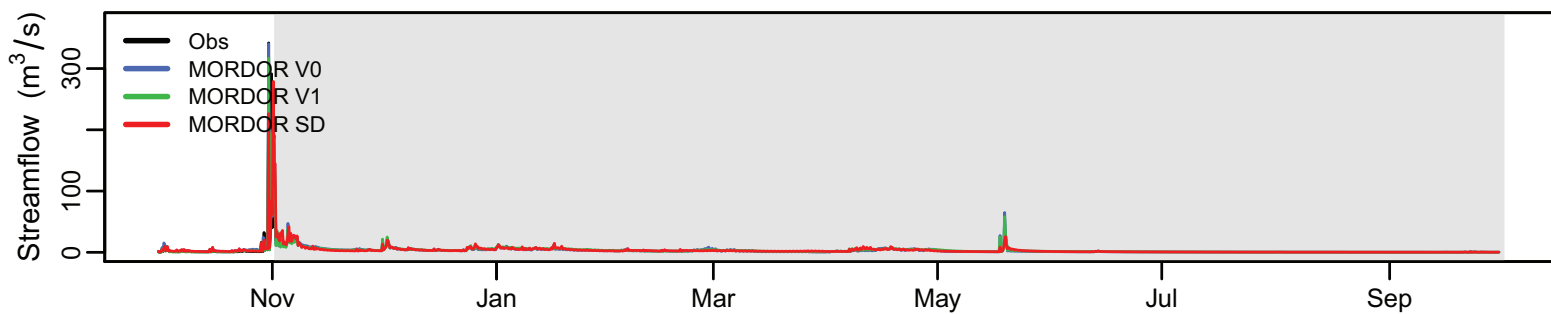

Year 1995

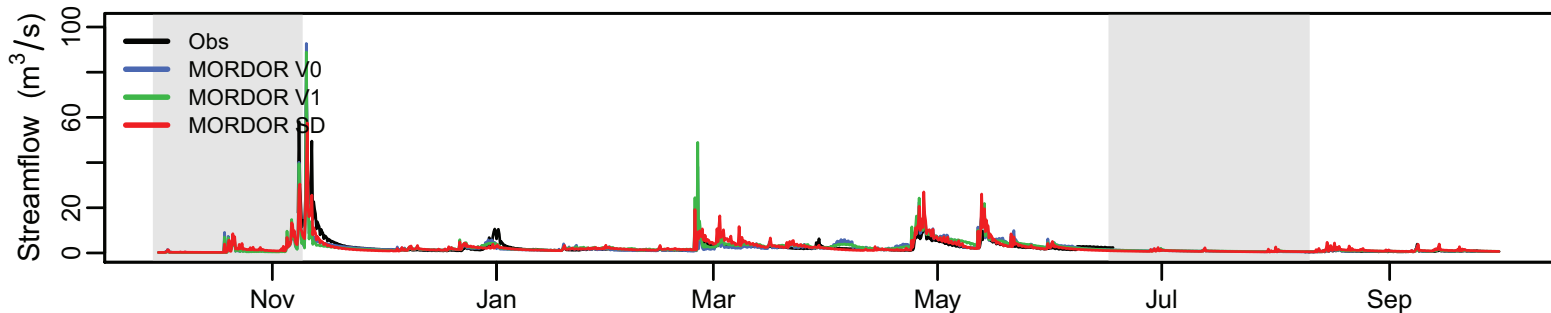

Year 1996

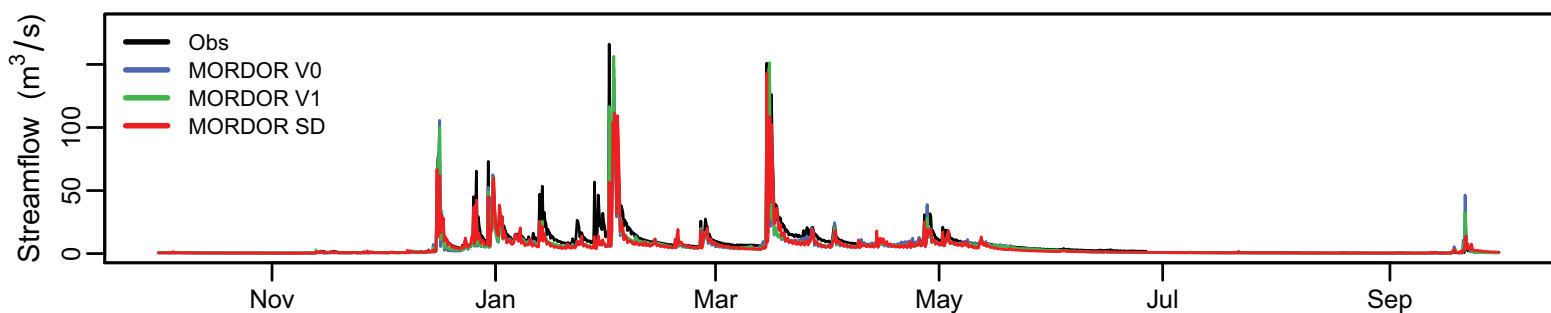

Year 1997

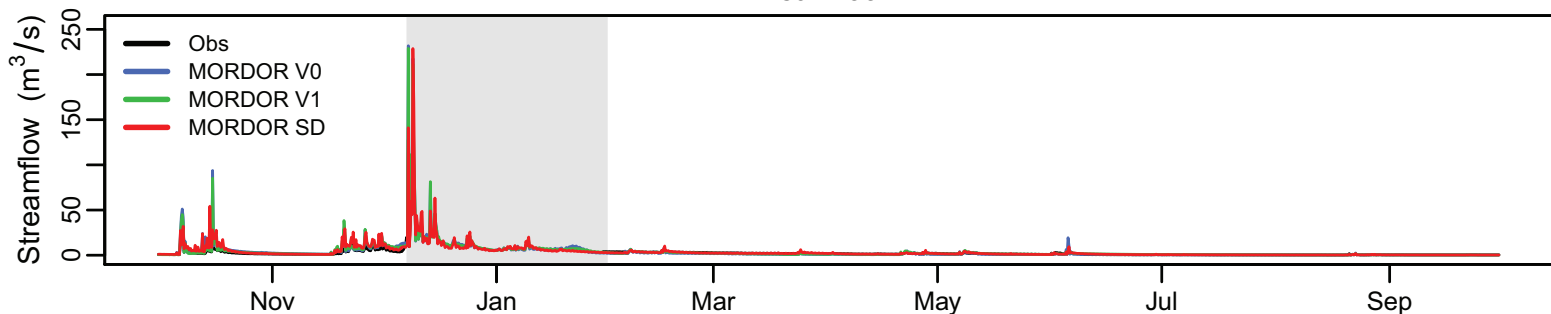

Year 1998

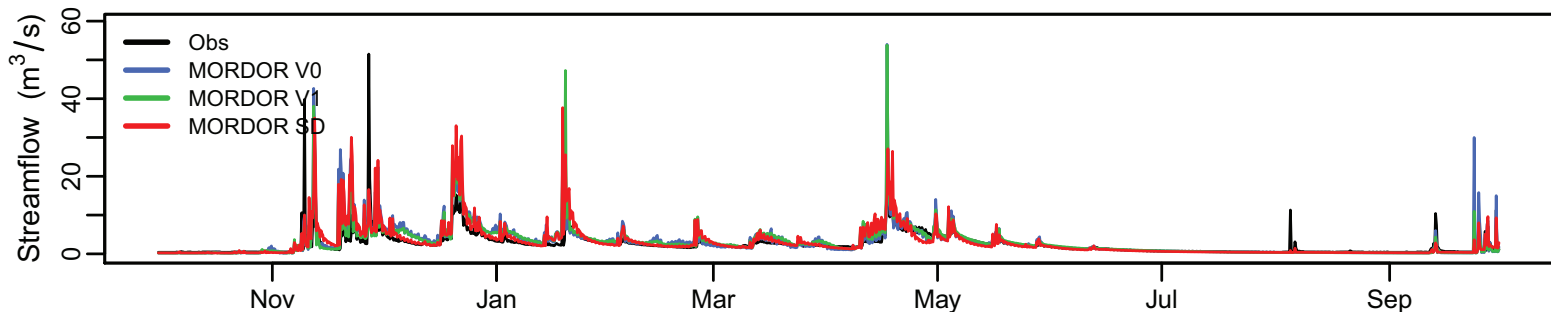

Year 1999

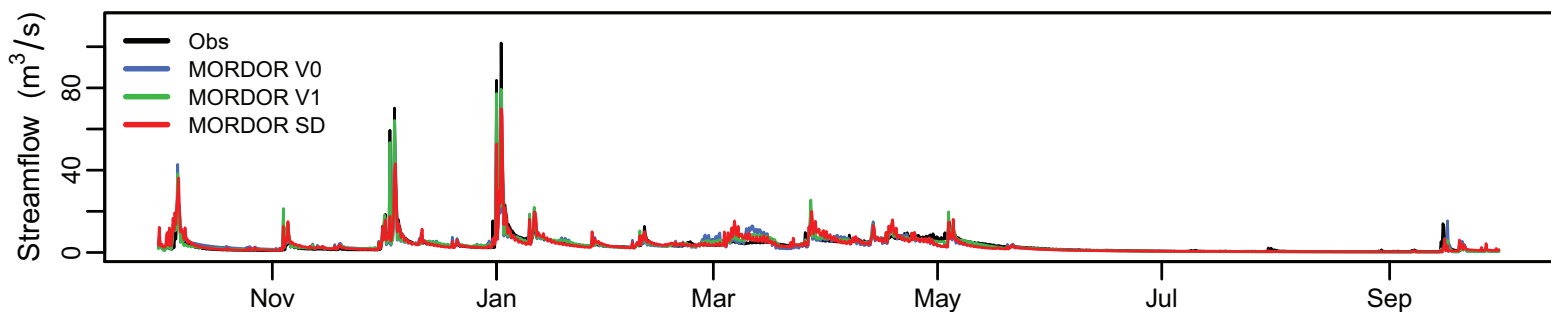

# Rizzanese@Barrage

Year 2000

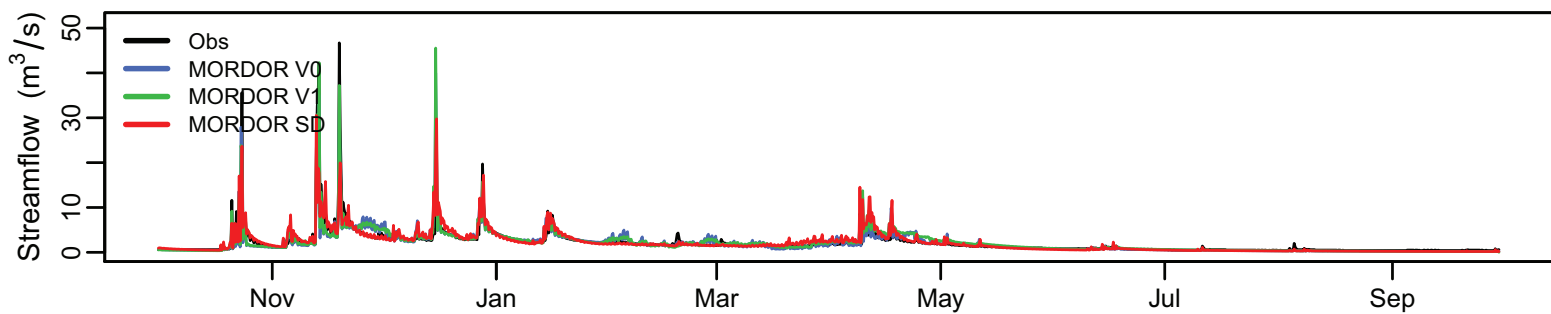

Year 2001

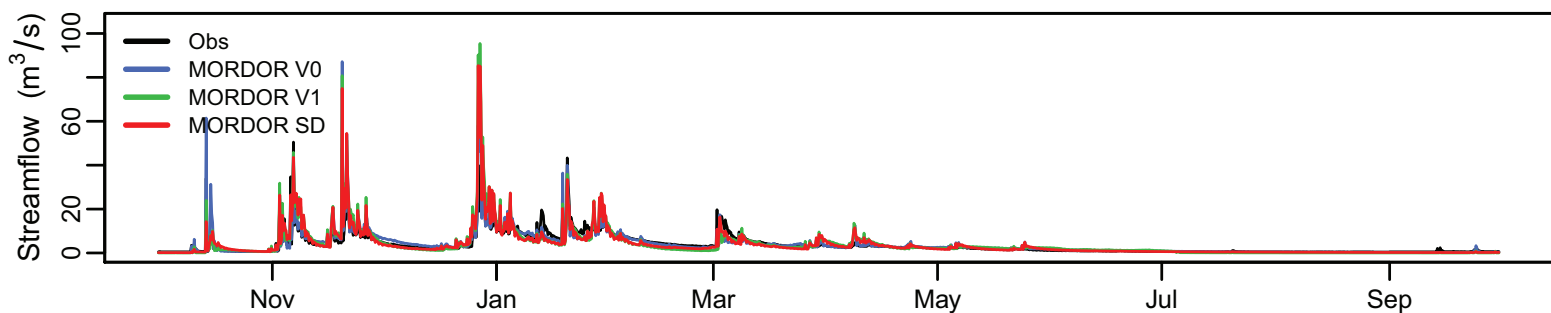

Year 2002

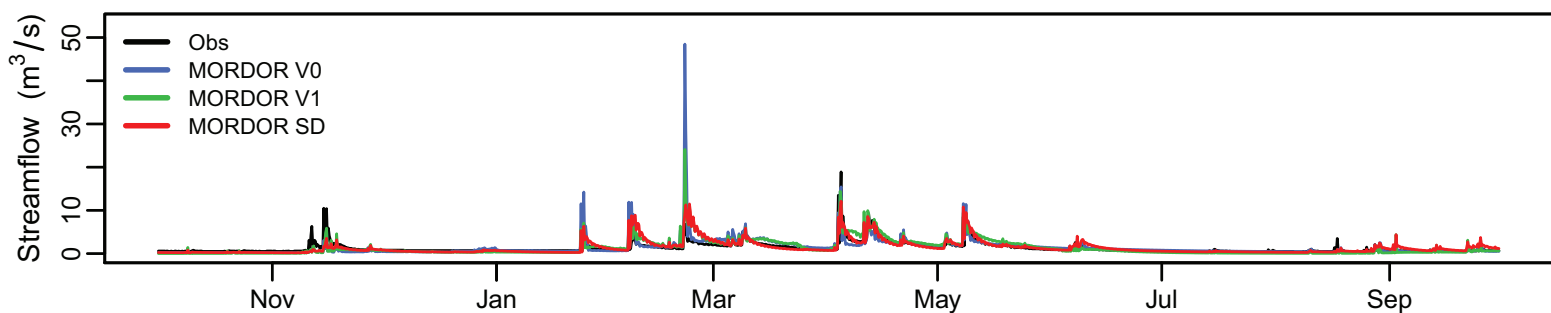

Year 2003

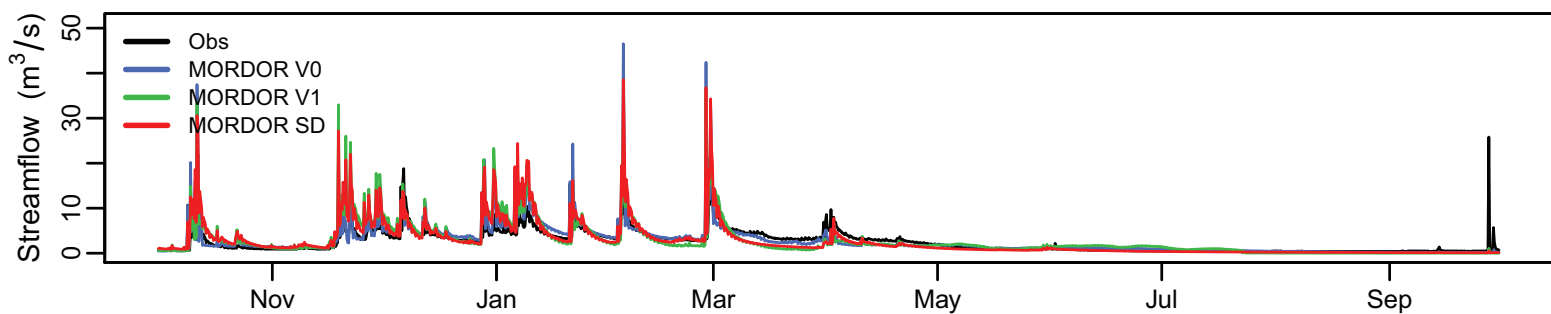

Year 2004

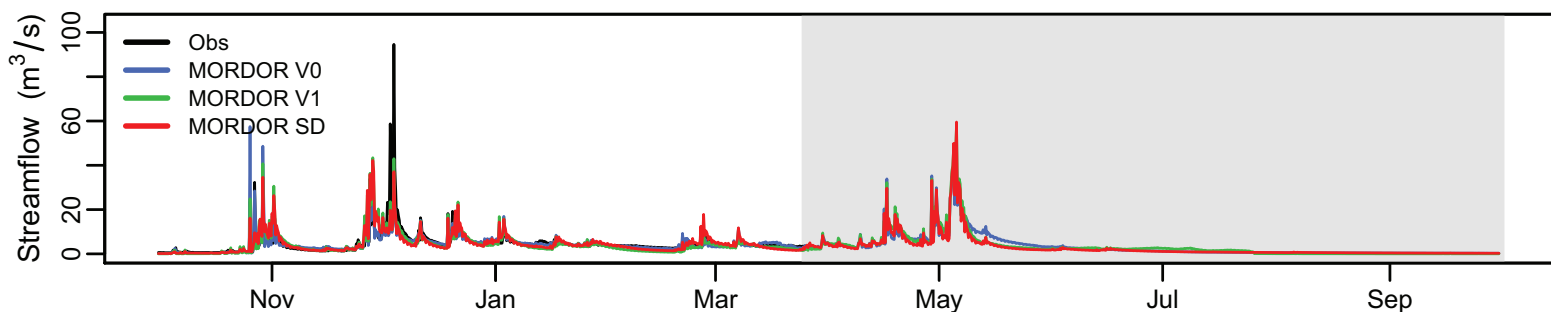

Year 2005

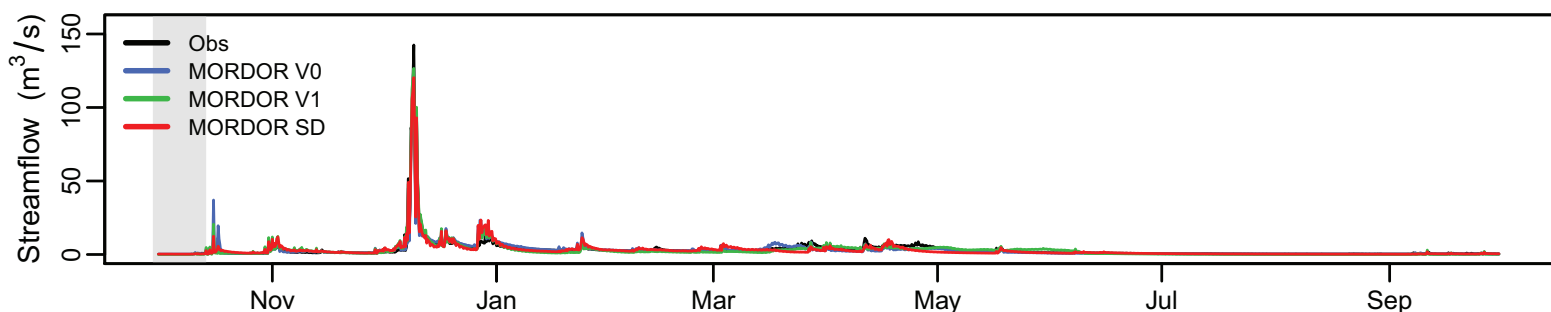

# Rizzanese@Barrage

Year 2006

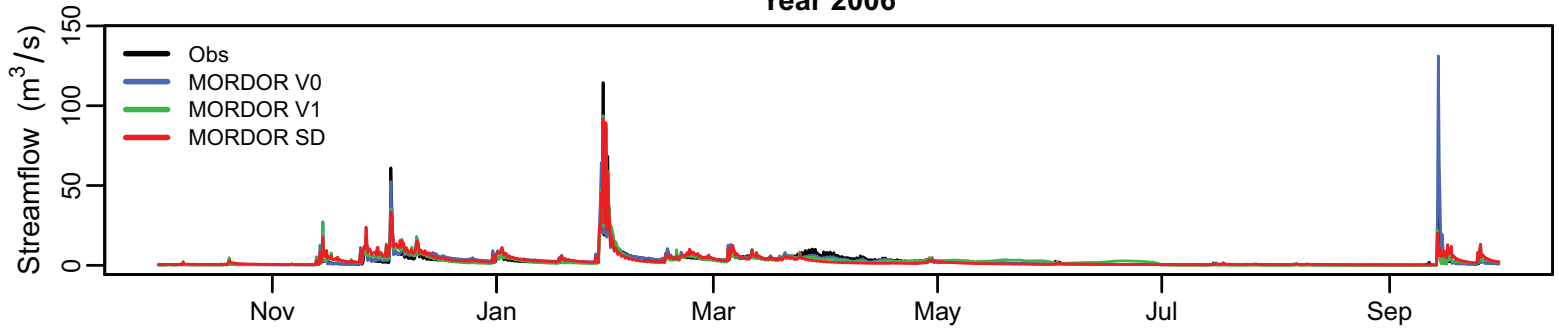

Year 2007

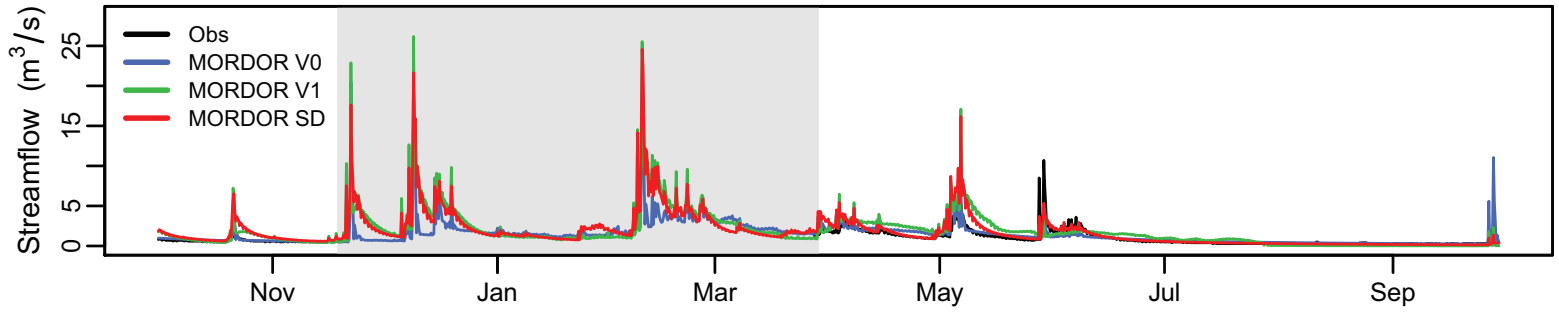

# Romanche@Chambon

Year 1986

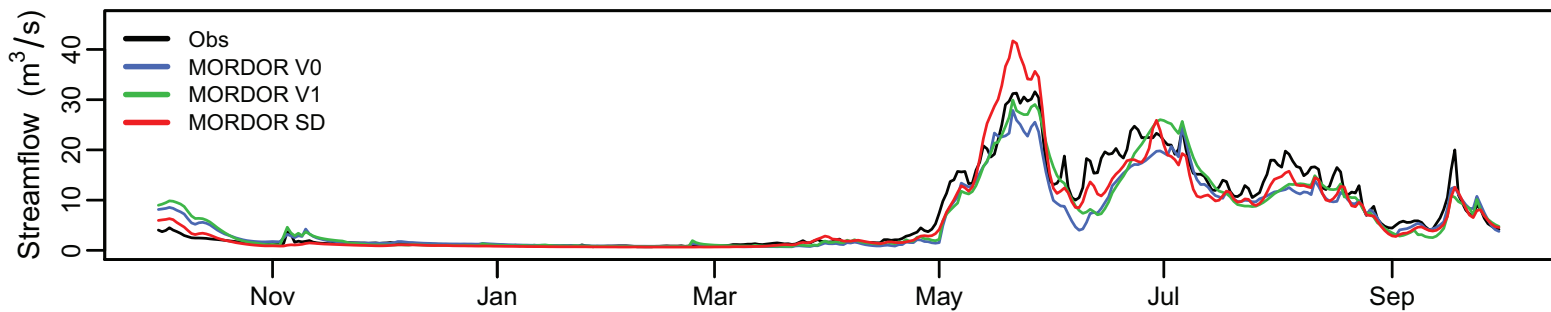

Year 1987

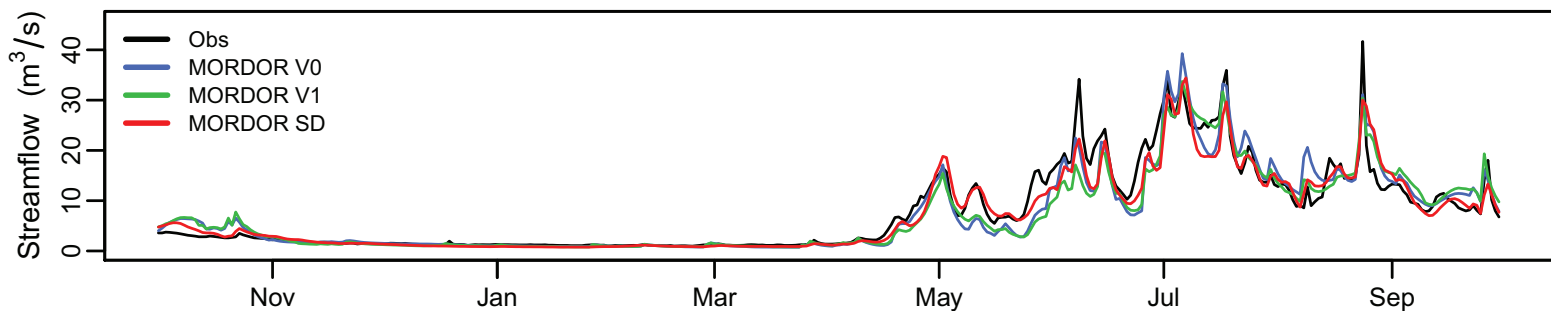

Year 1988

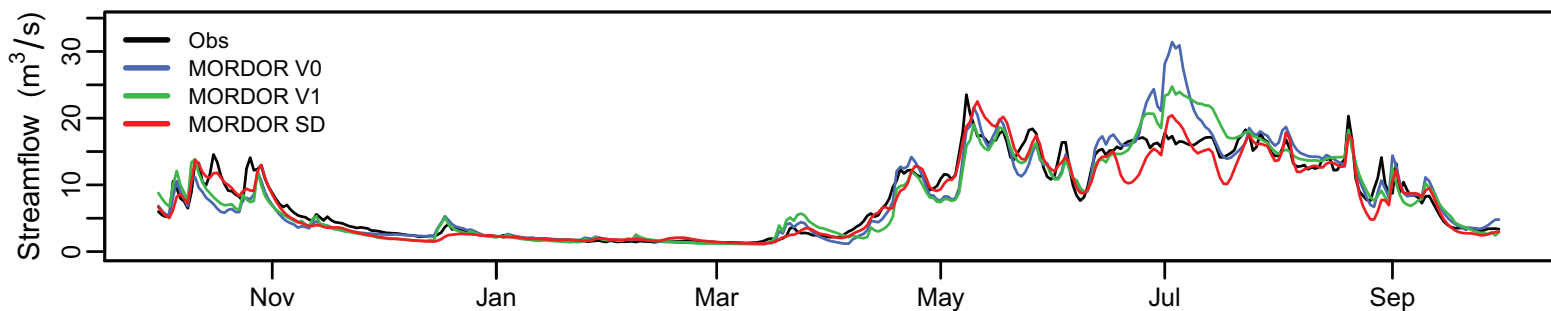

Year 1989

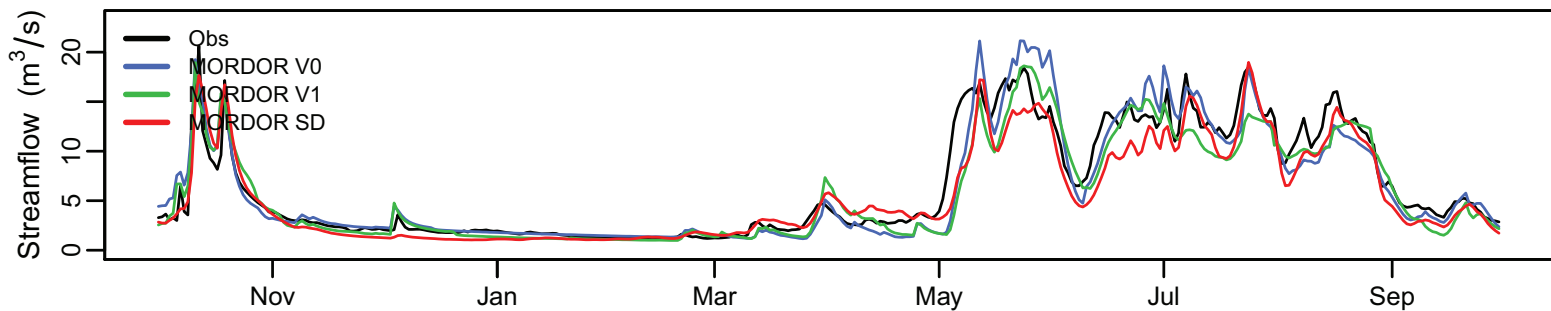

Year 1990

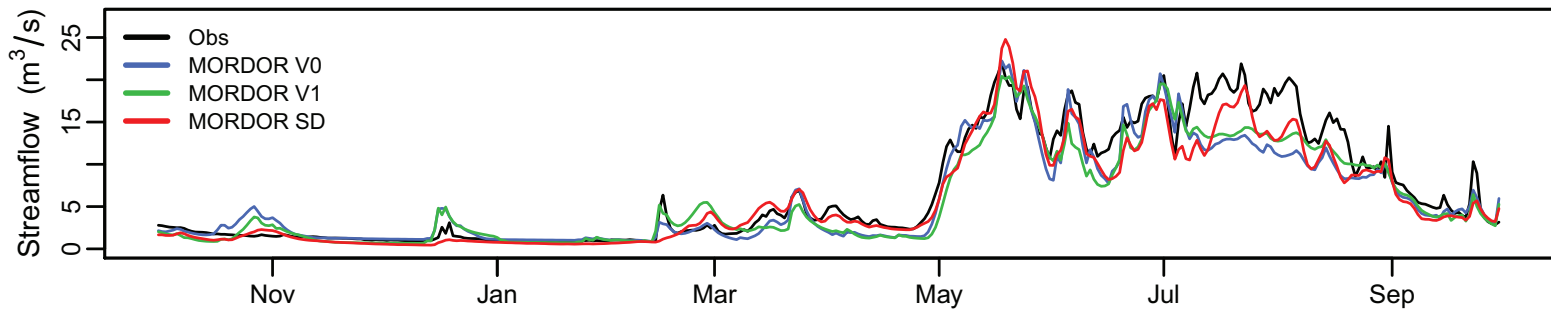

Year 1991

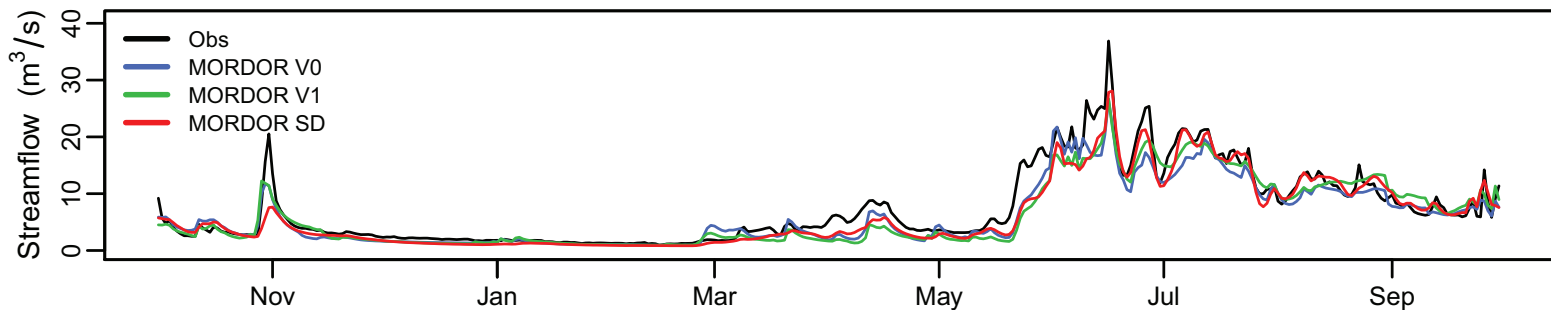



# Romanche@Chambon

Year 1992

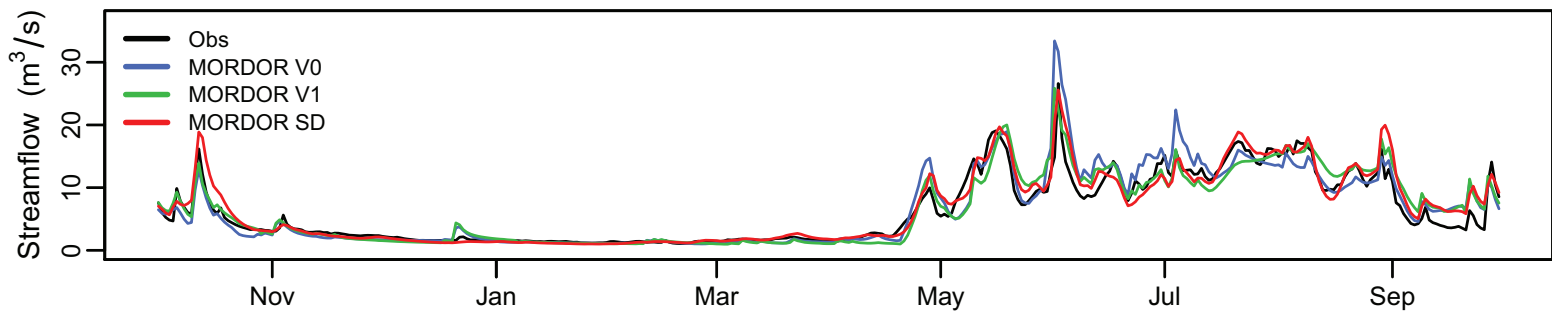

Year 1993

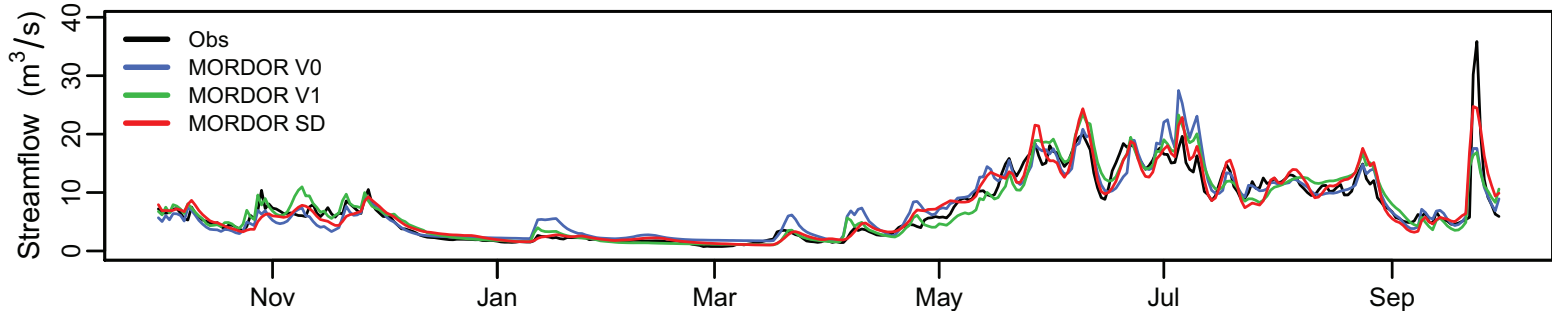

Year 1994

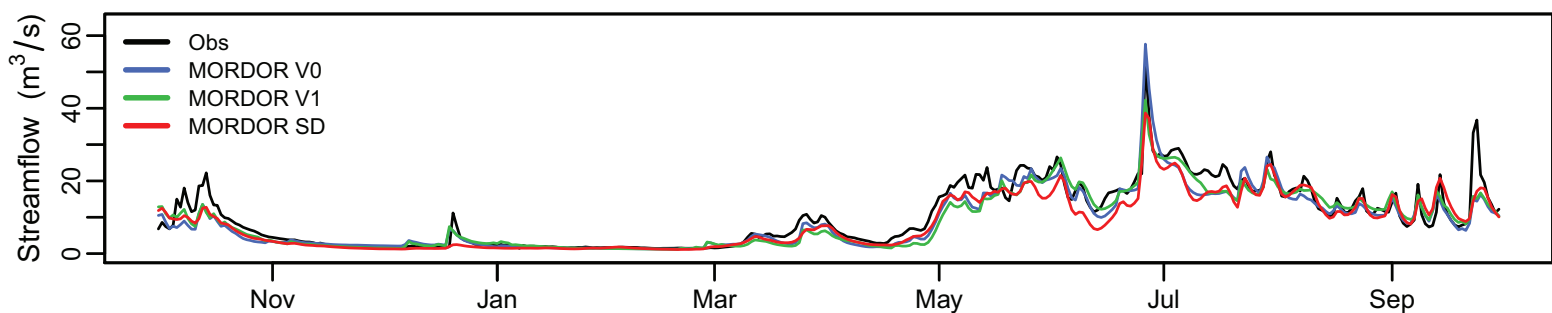

Year 1995

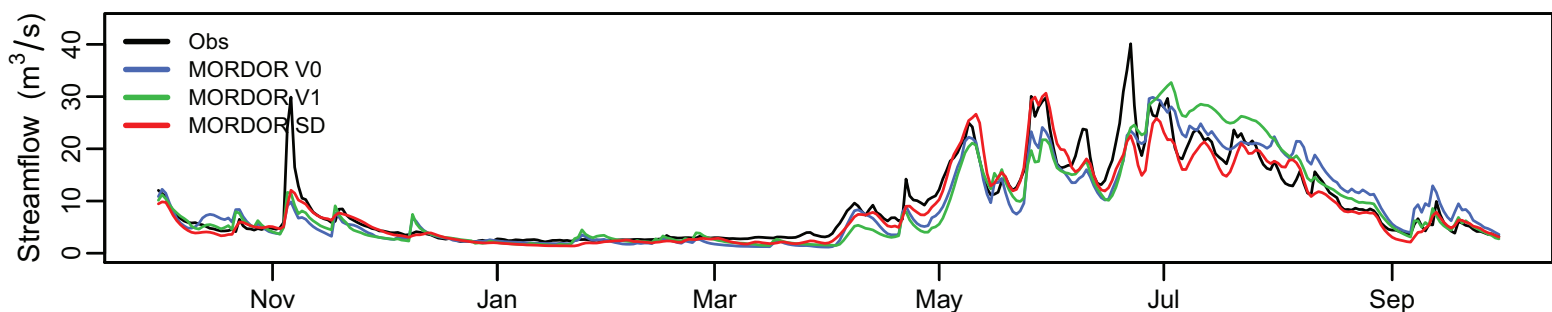

Year 1996

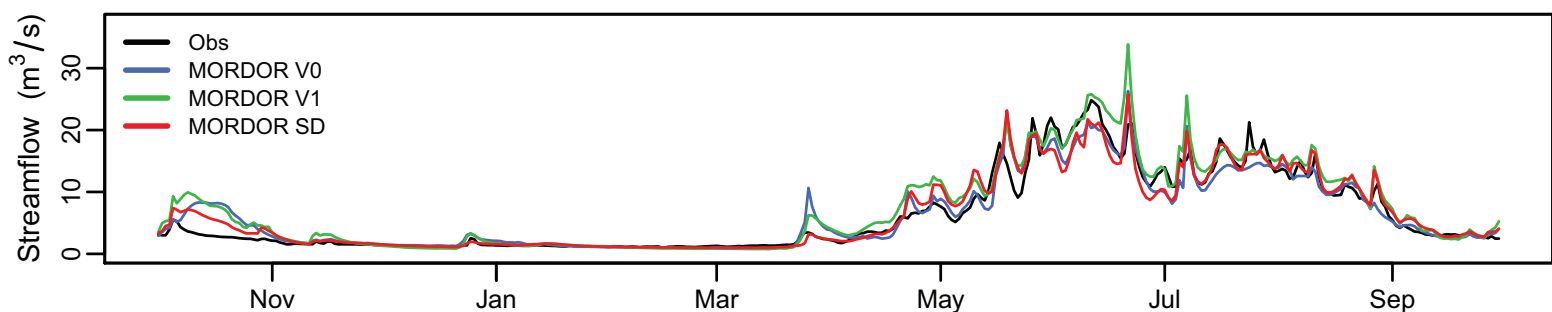

Year 1997

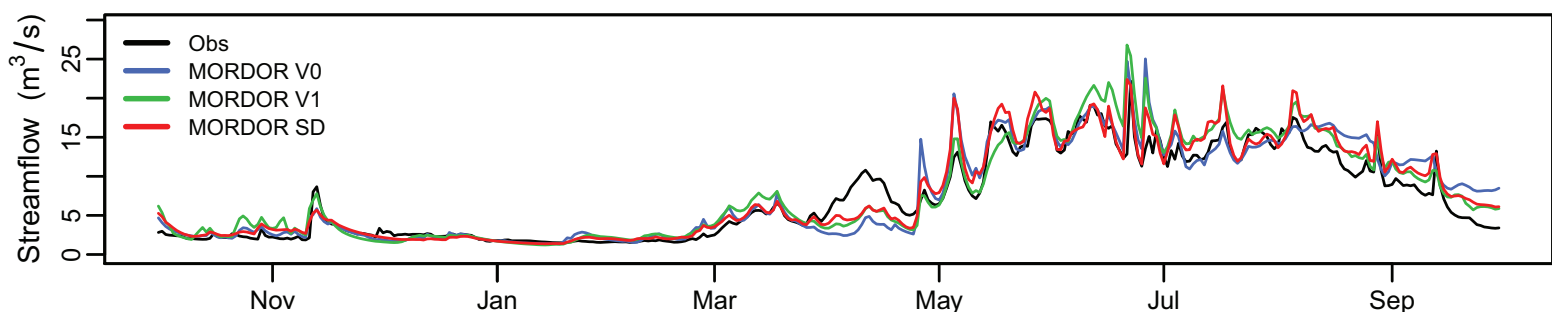

# Romanche@Chambon

Year 1998

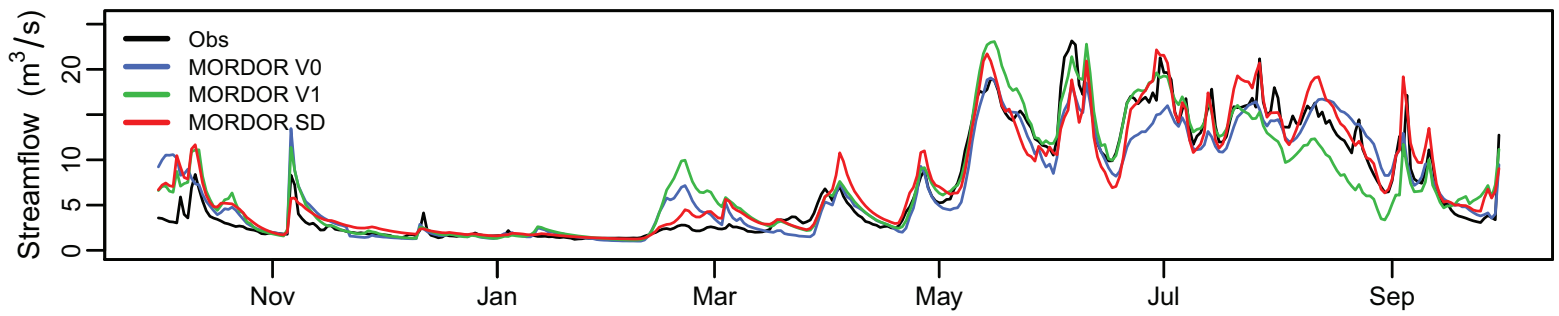

Year 1999

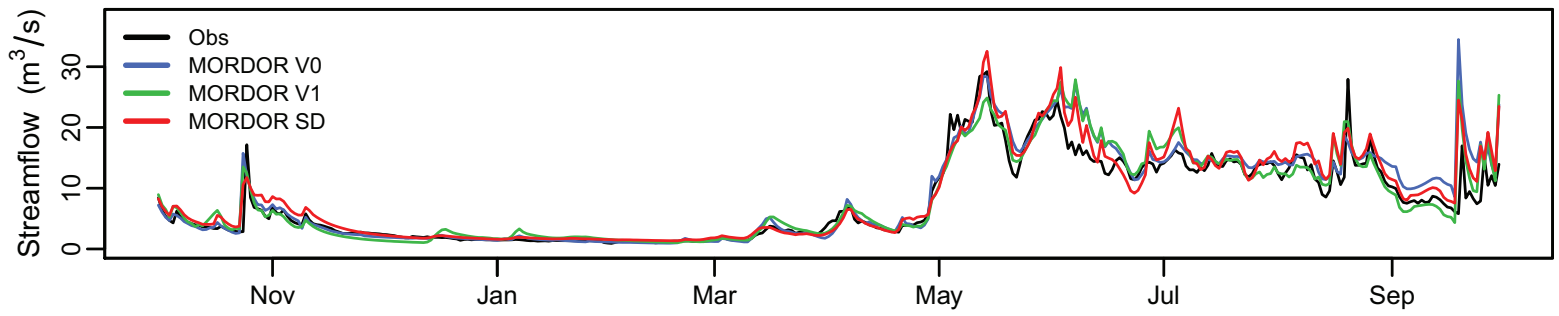

Year 2000

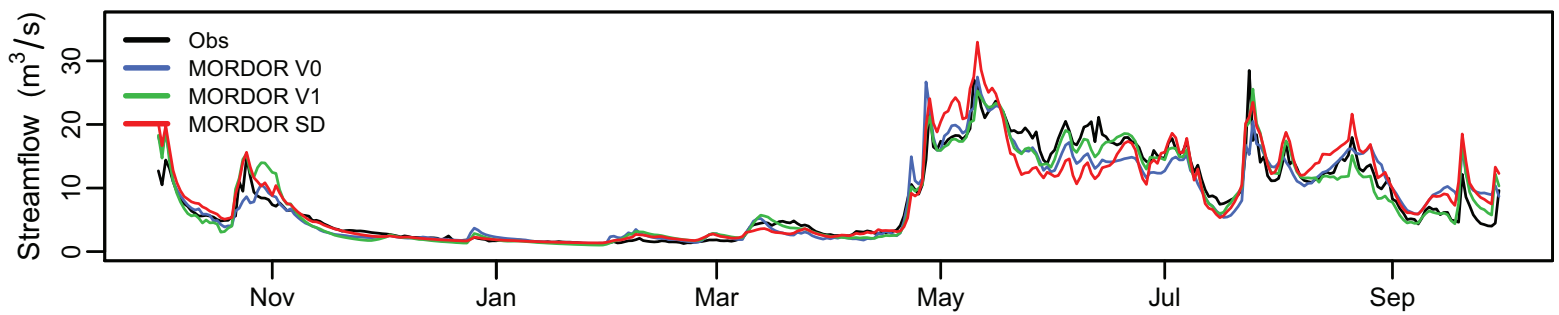

Year 2001

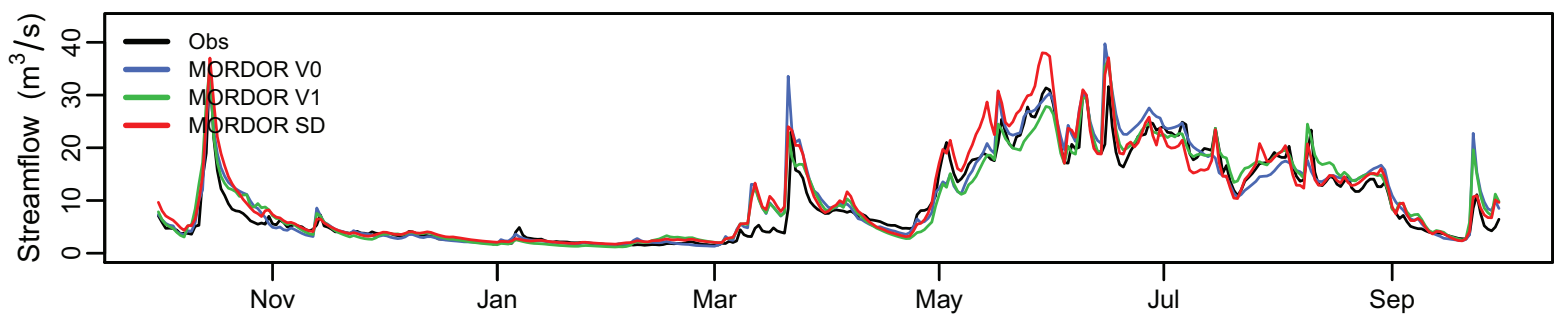

Year 2002

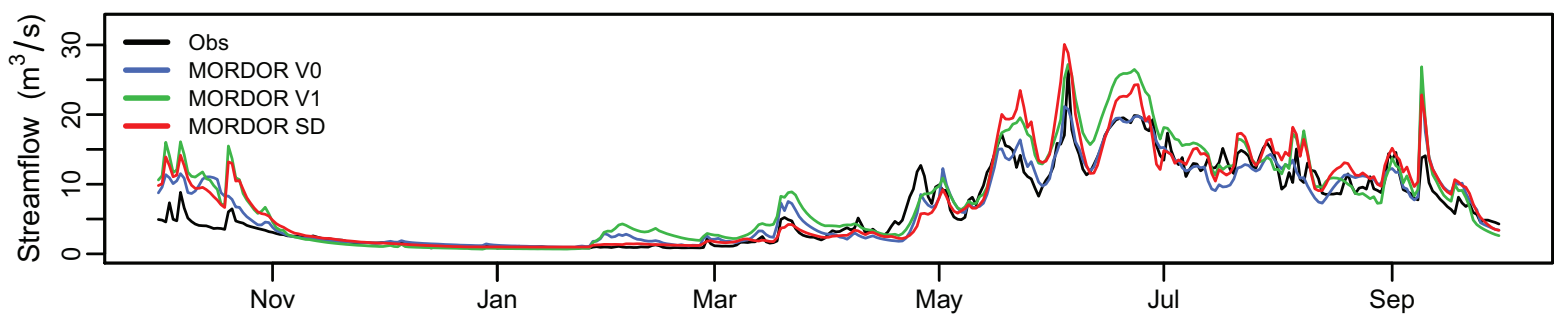

Year 2003

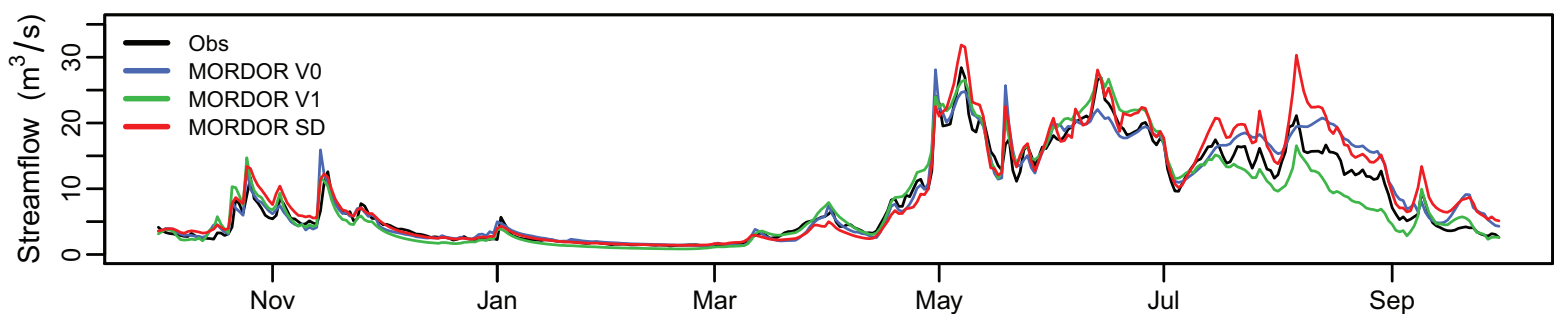

# Romanche@Chambon

Year 2004

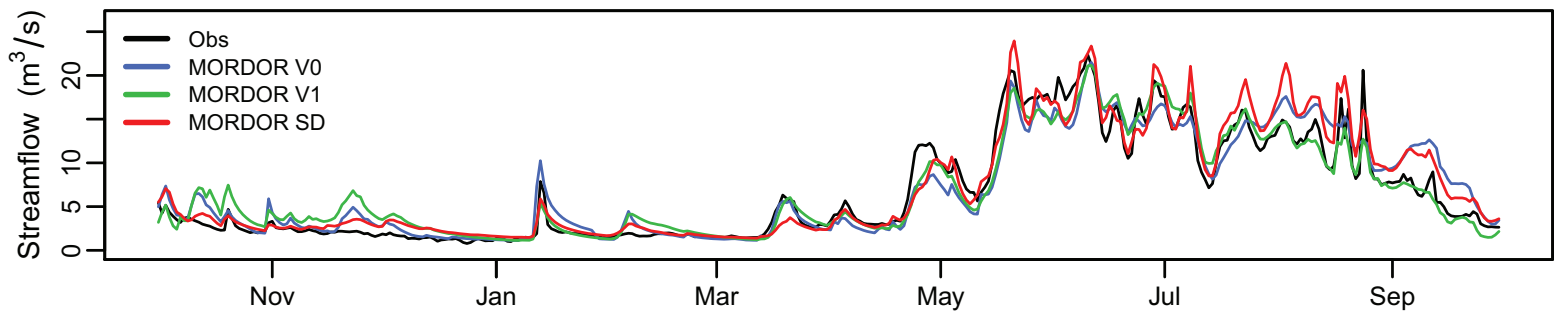

Year 2005

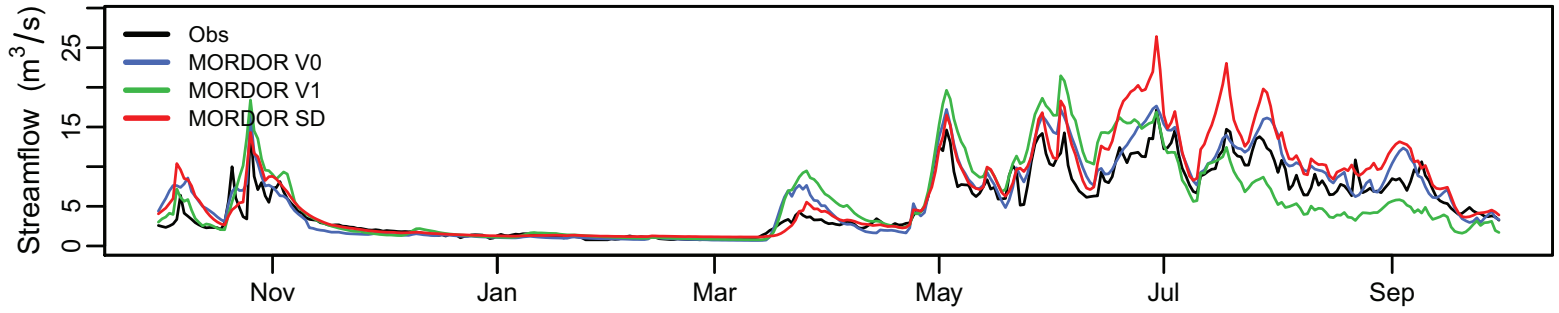

# Roya@Breil

Year 1988

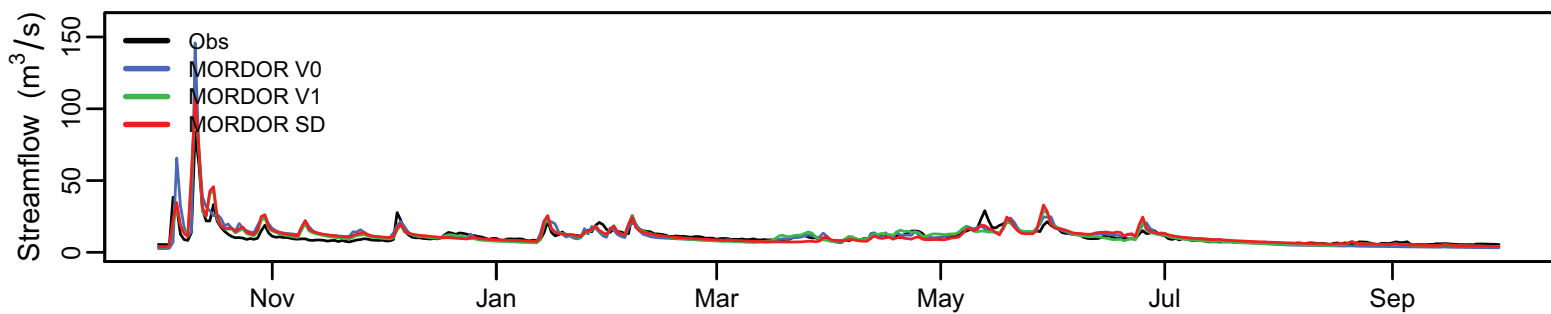

Year 1989

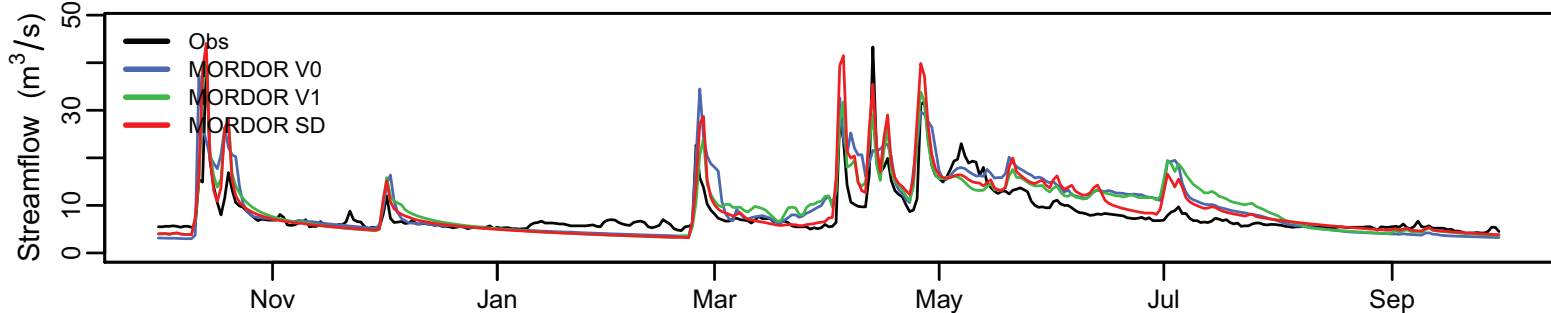

Year 1990

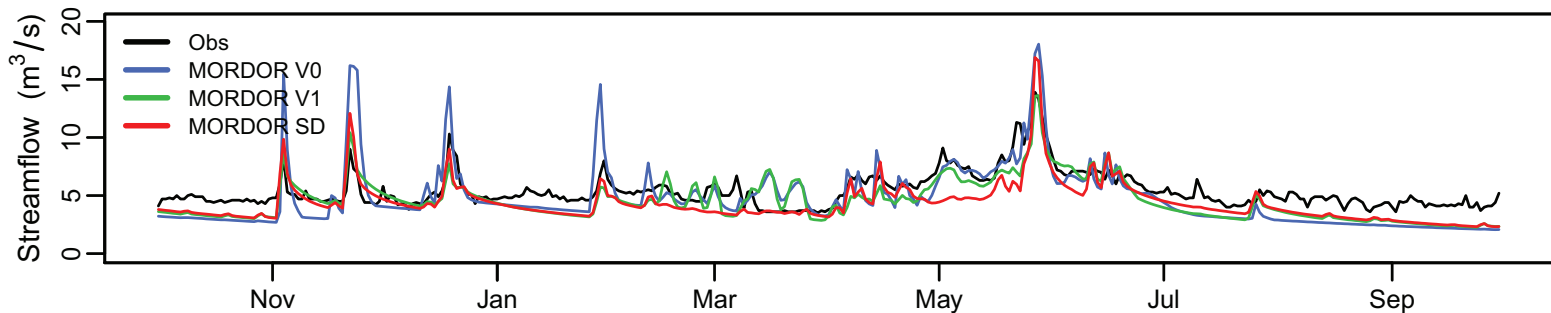

Year 1991

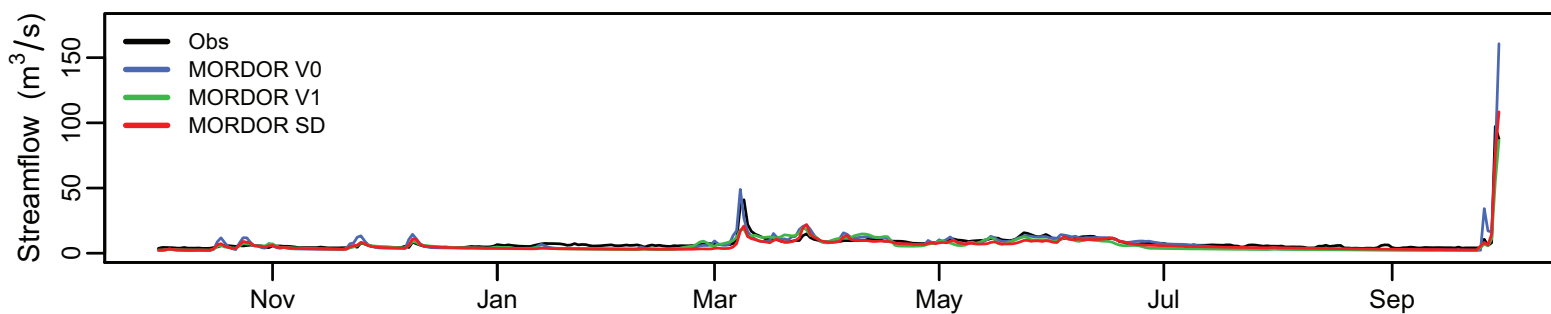

Year 1992

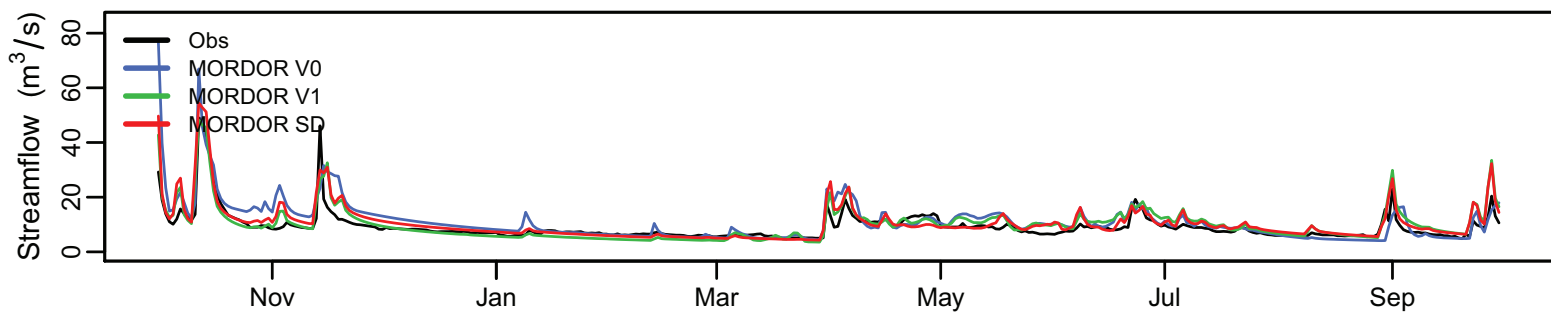

Year 1993

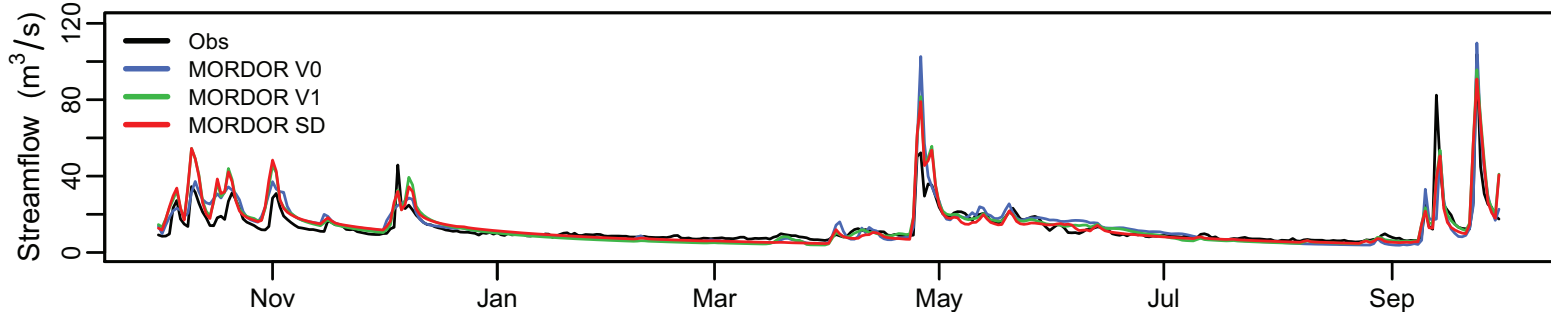

# Roya@Breil

Year 1994

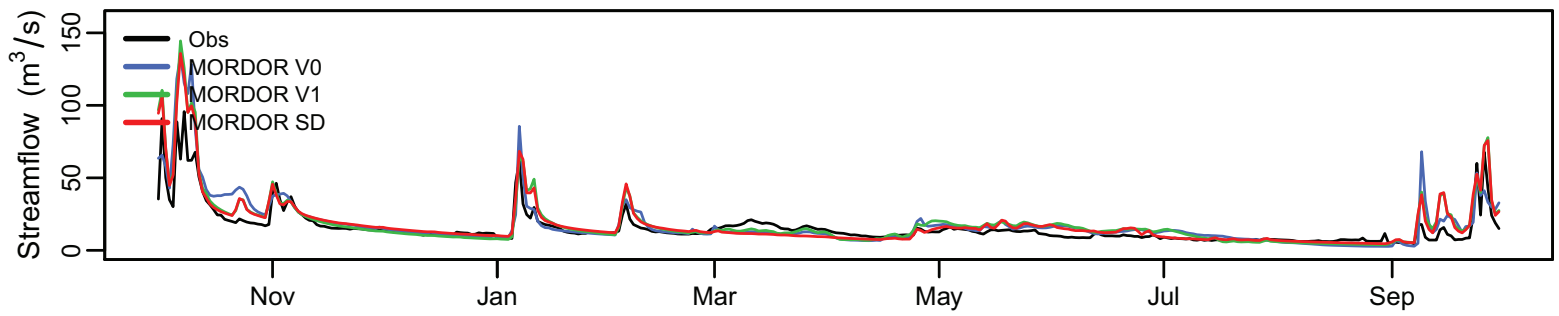

Year 1995

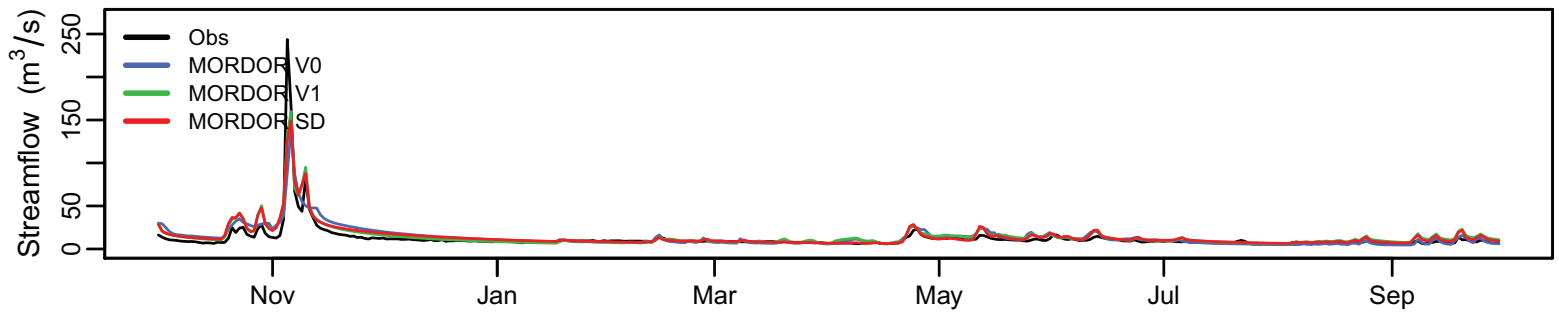

Year 1996

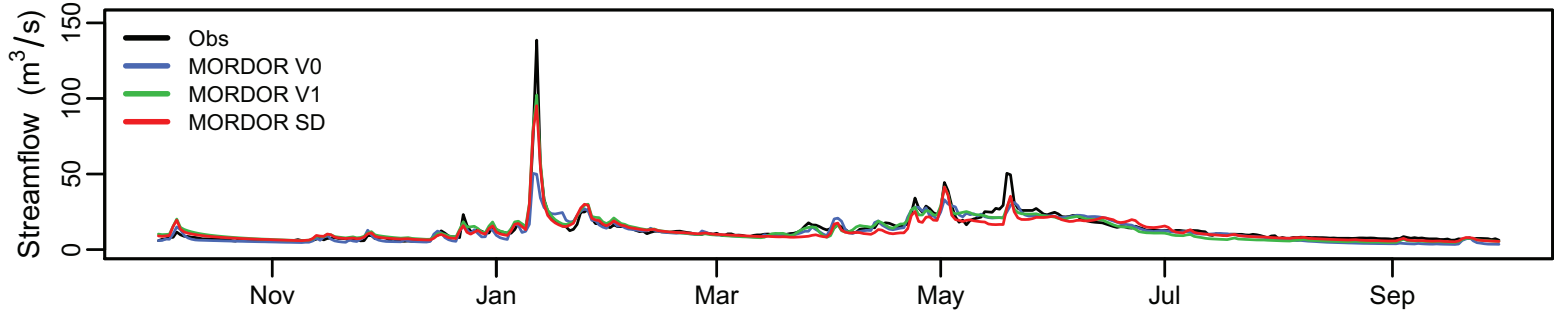

Year 1997

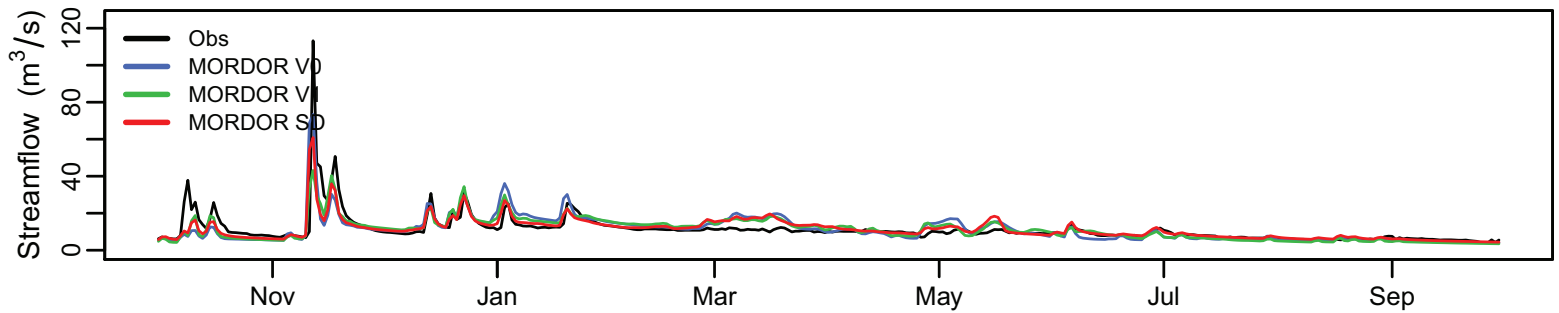

Year 1998

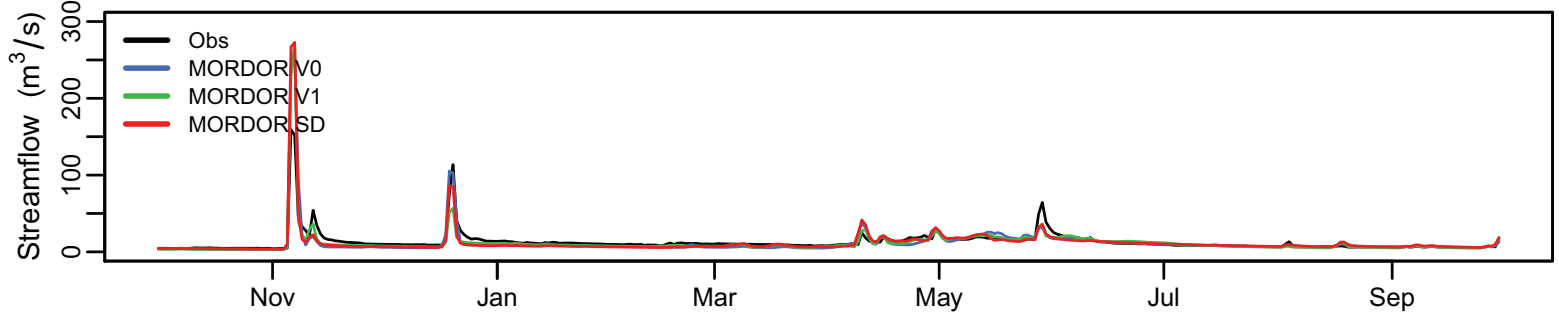

Year 1999

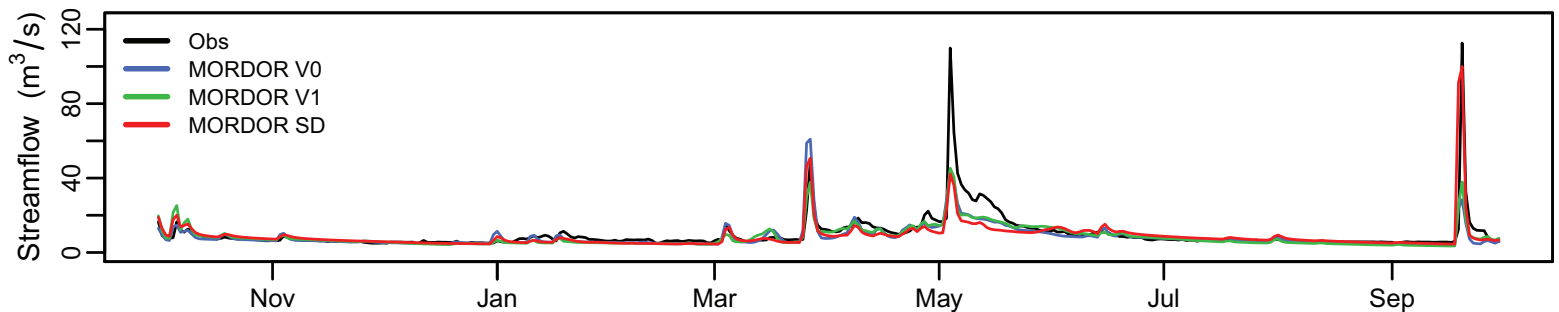

# Roya@Breil

Year 2000

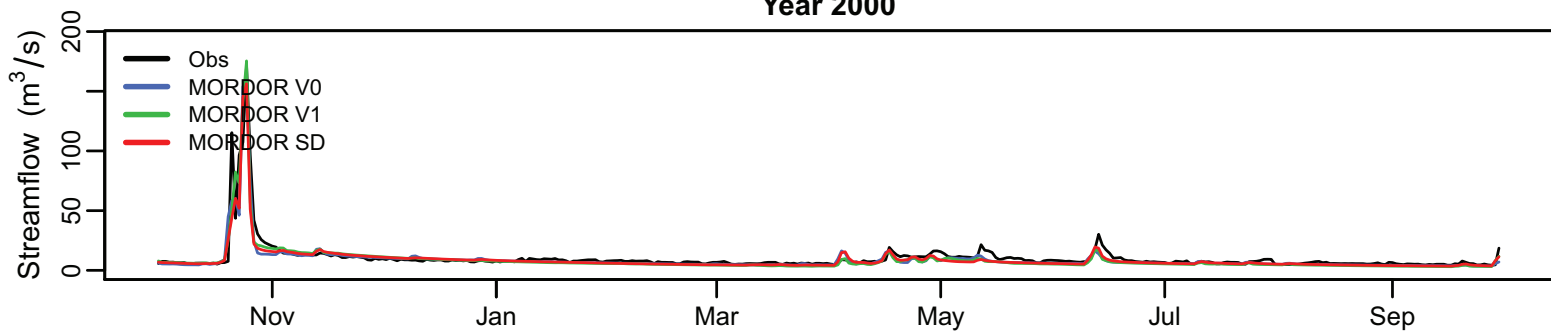

Year 2001

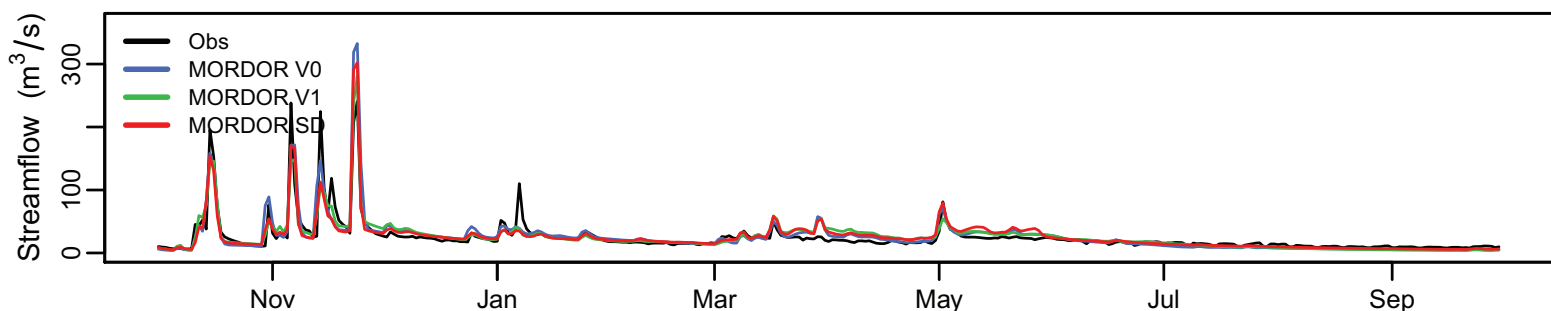

Year 2002

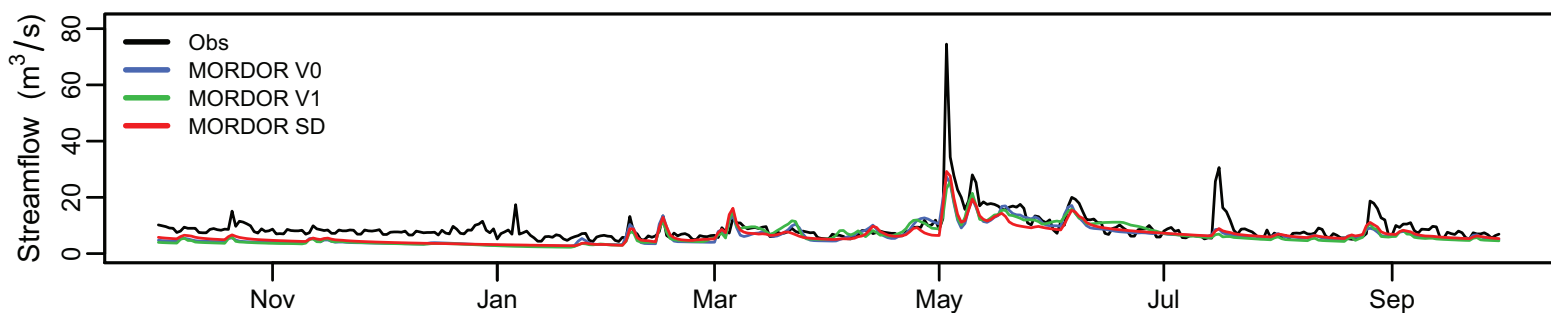

Year 2003

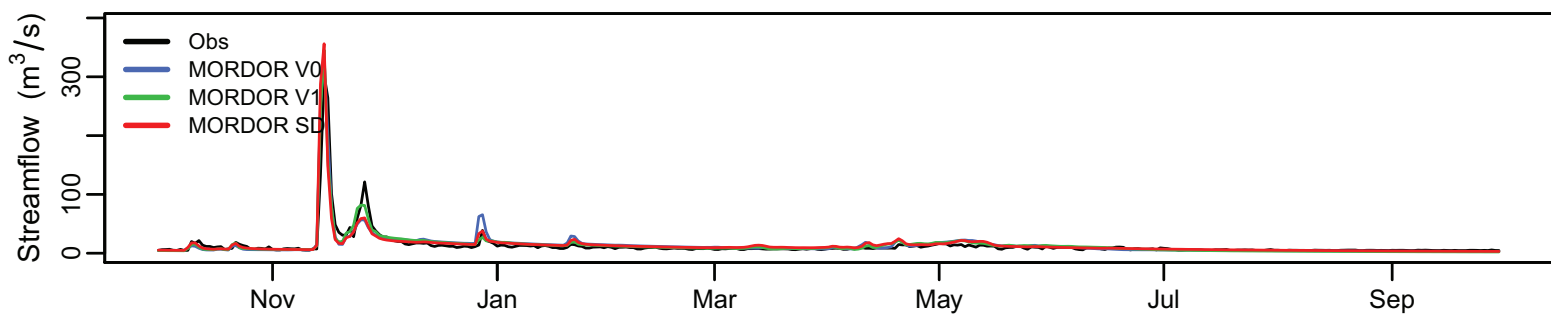

Year 2004

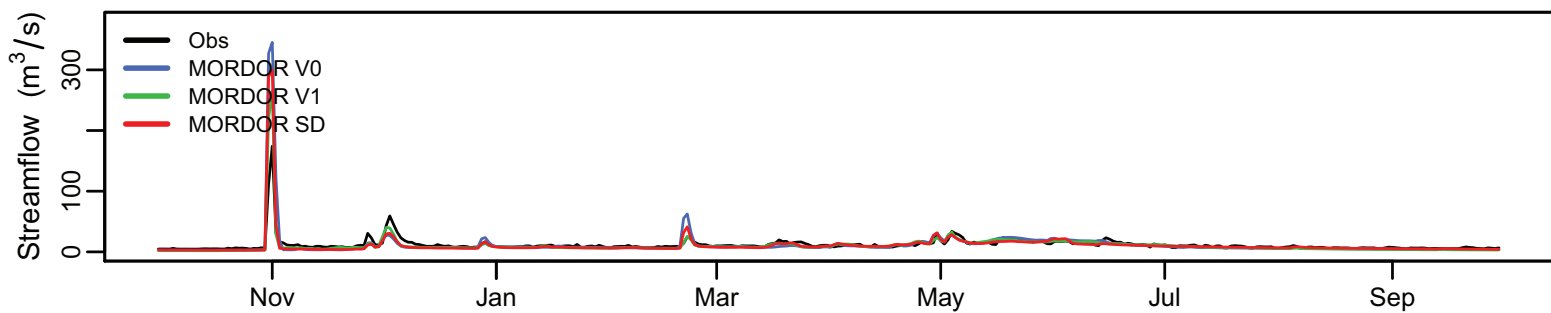

Year 2005

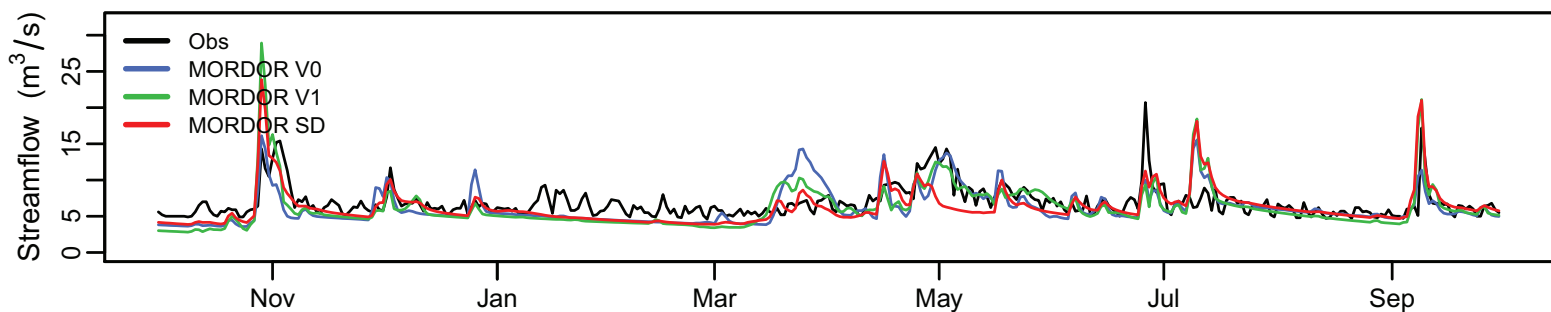

# Salat@Roquefort

Year 1994

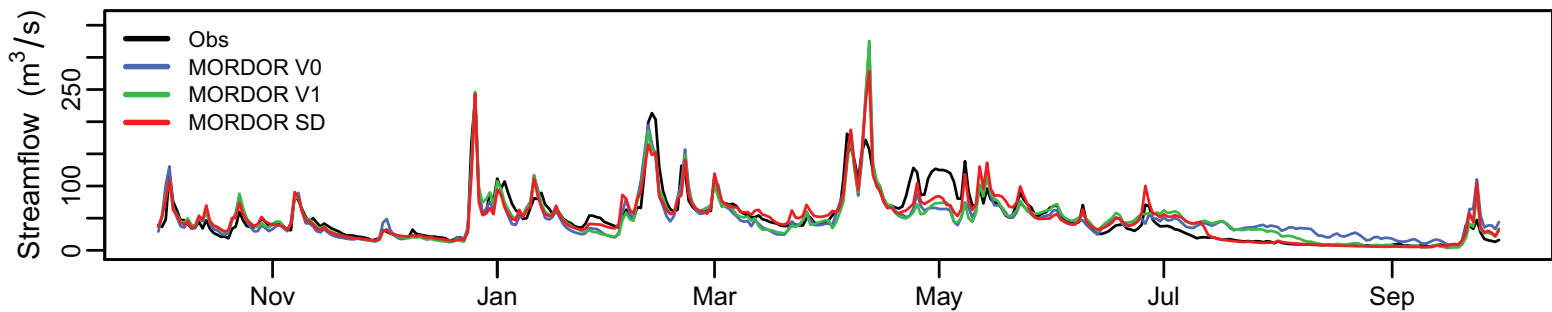

Year 1995

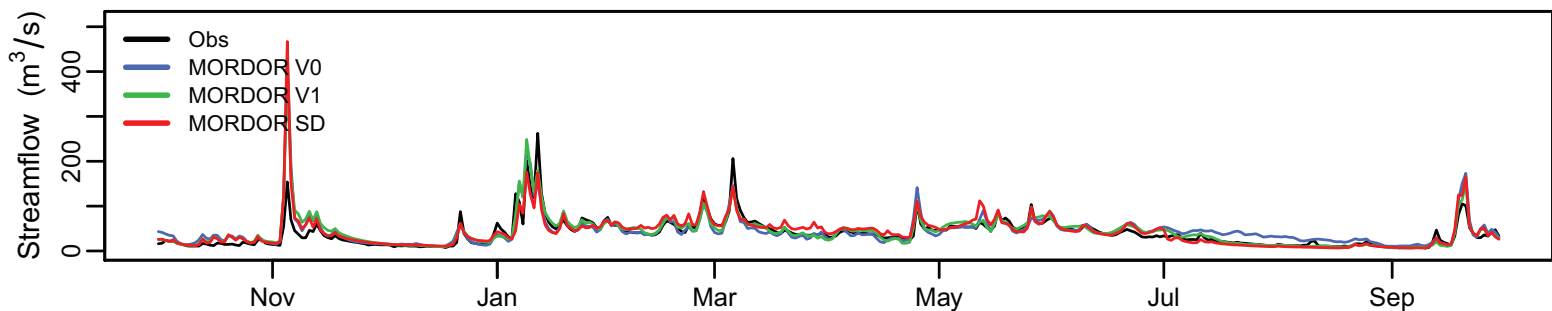

Year 1996

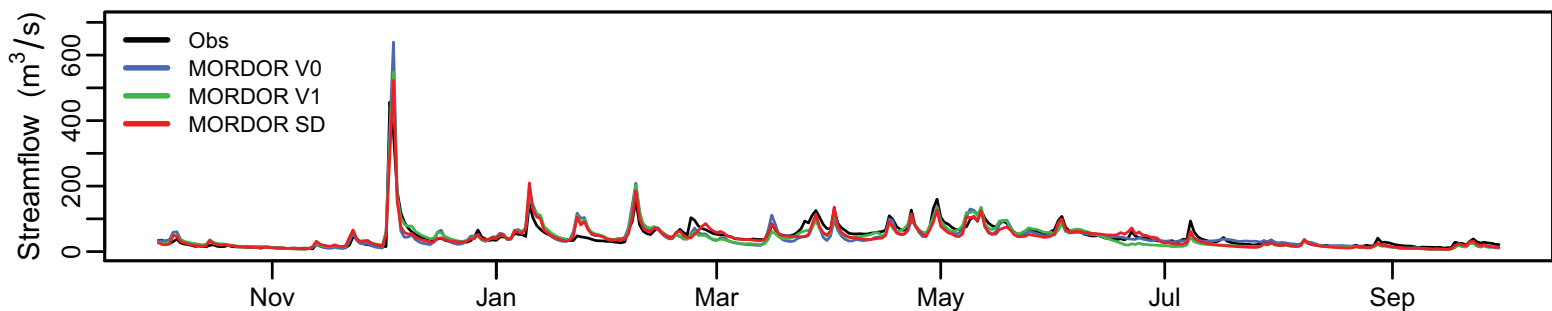

Year 1997

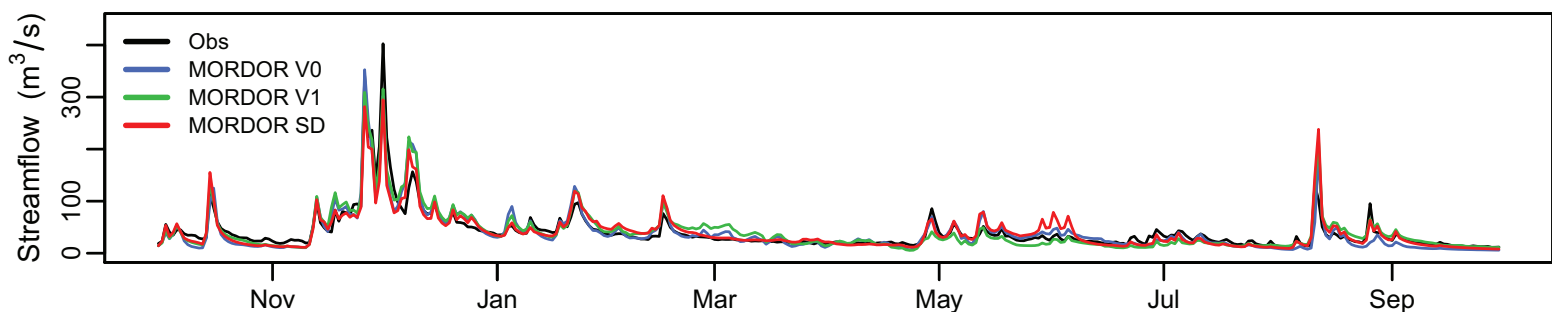

Year 1998

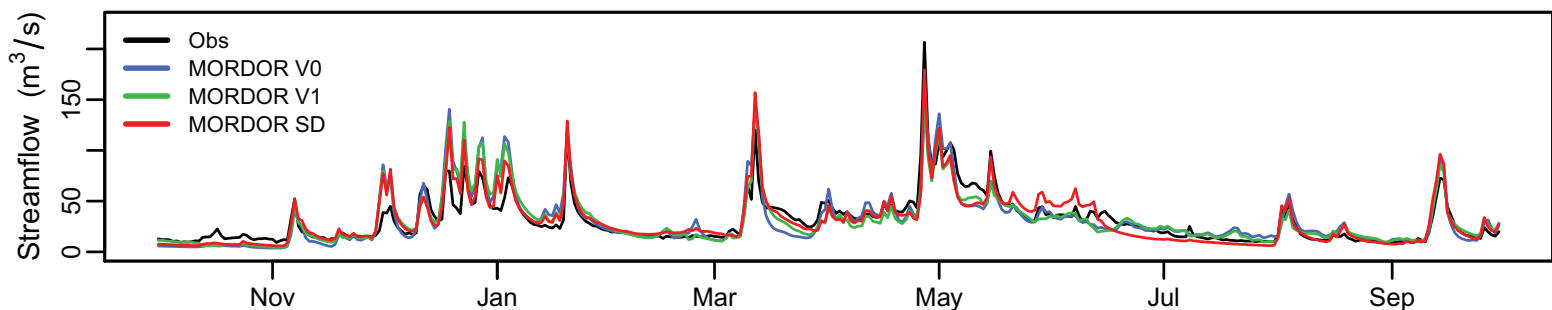

Year 1999

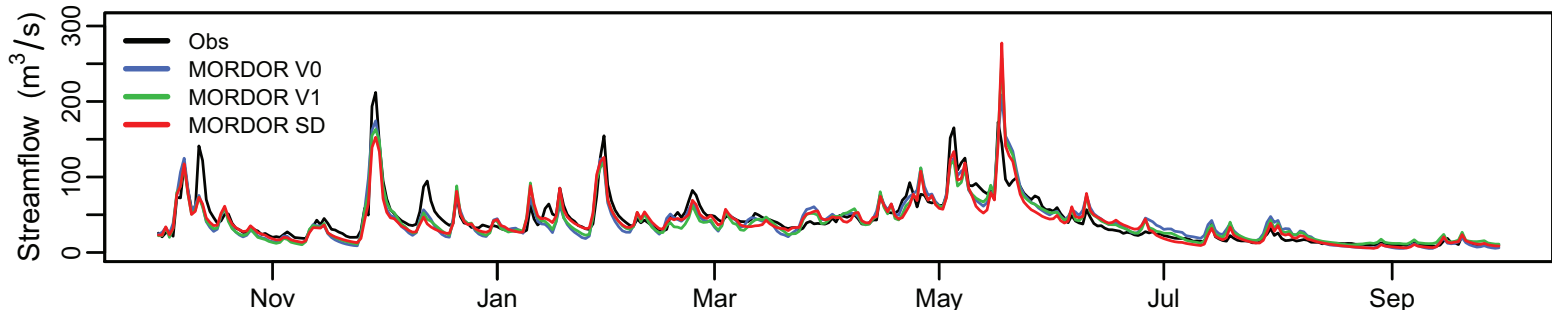

# Salat@Roquefort

Year 2000

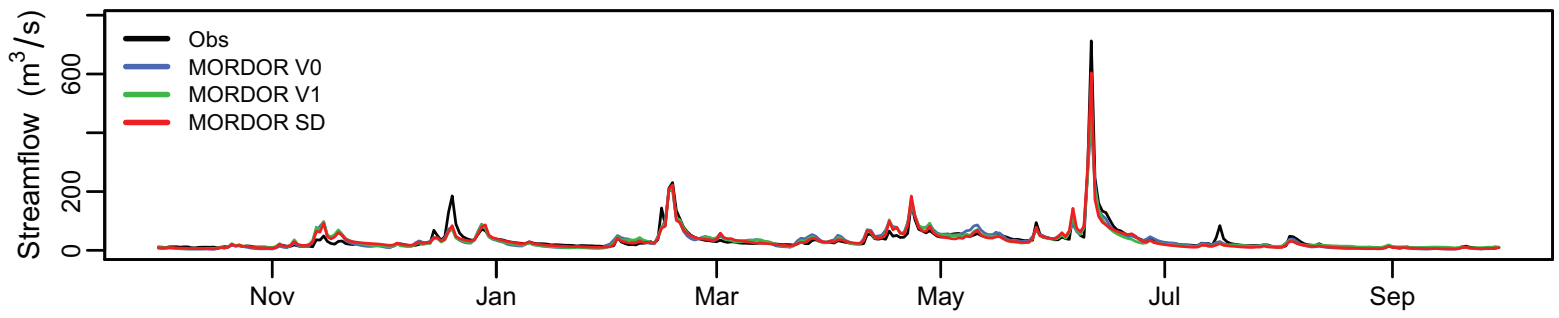

Year 2001

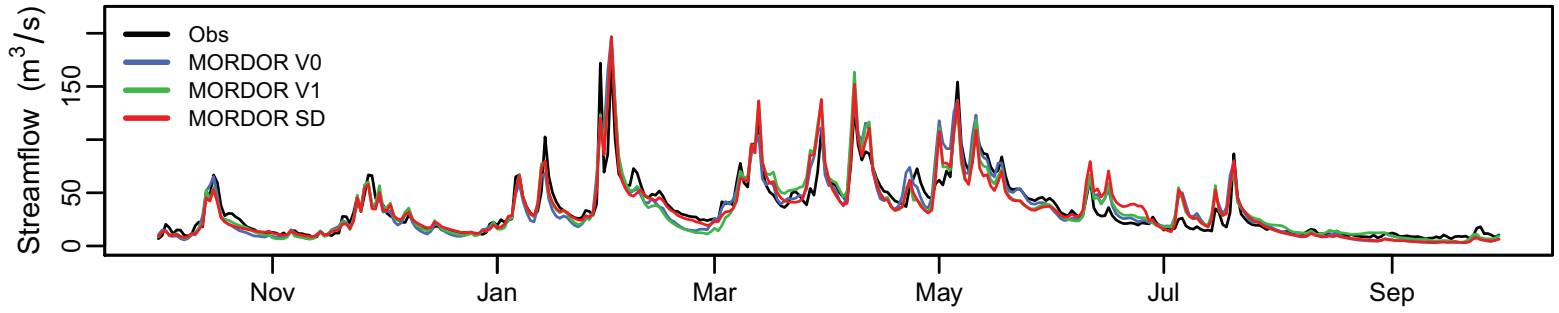

Year 2002

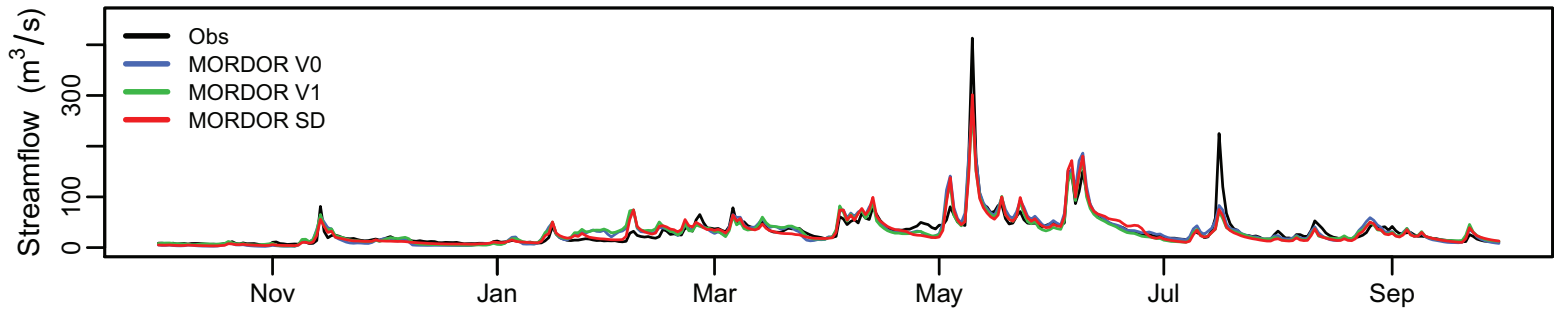

Year 2003

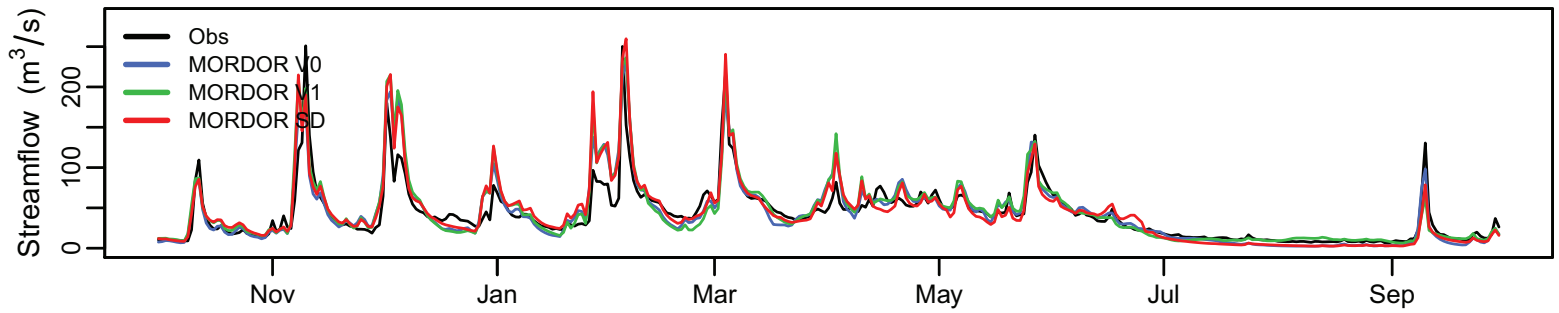



# Sioule@Fades

Year 1957

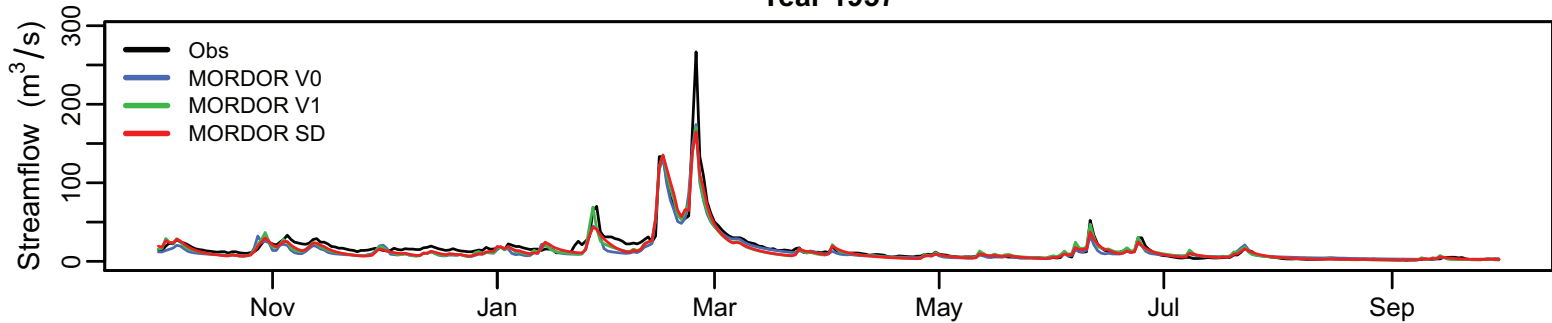

Year 1958

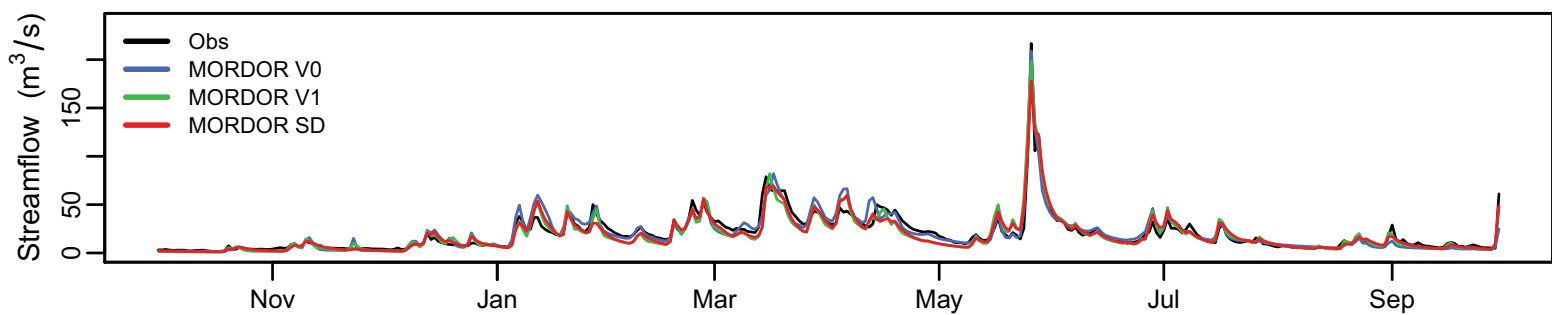

Year 1959

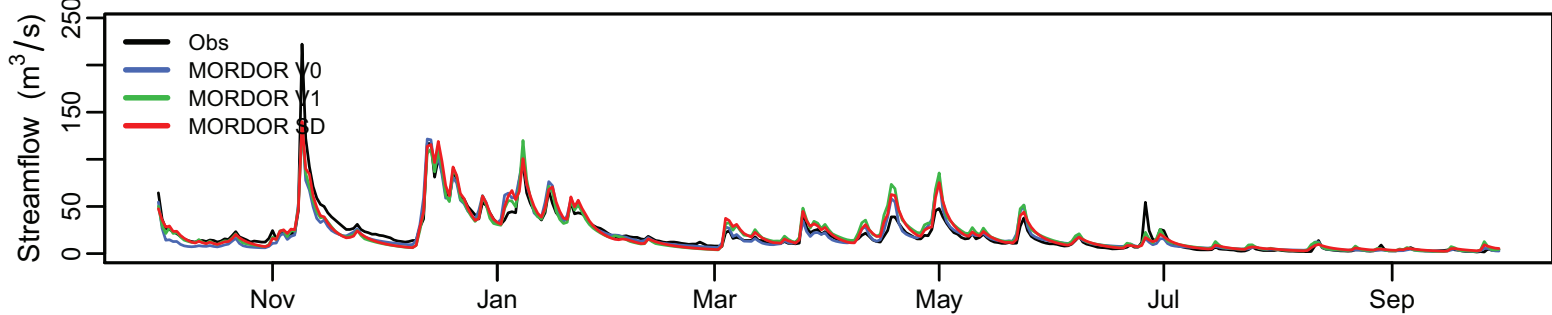

Year 1960

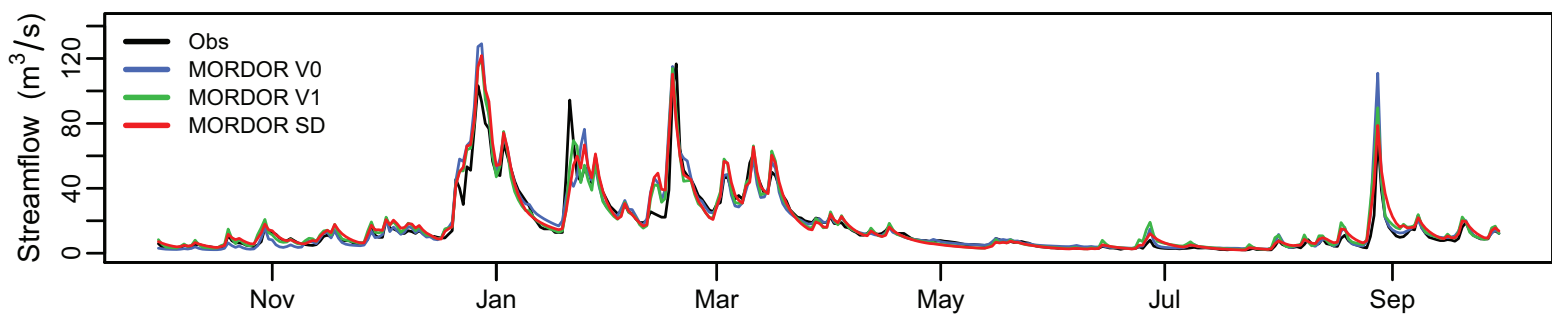

Year 1961

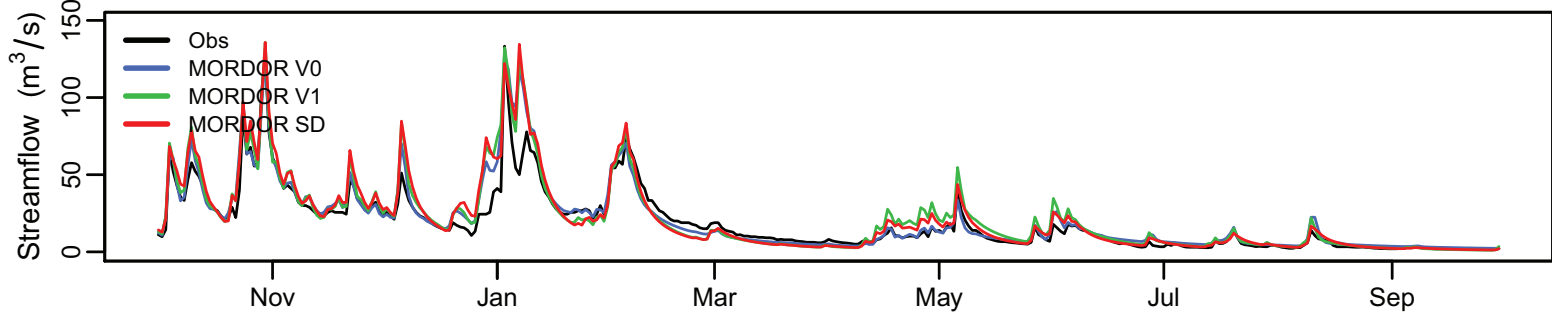

Year 1962

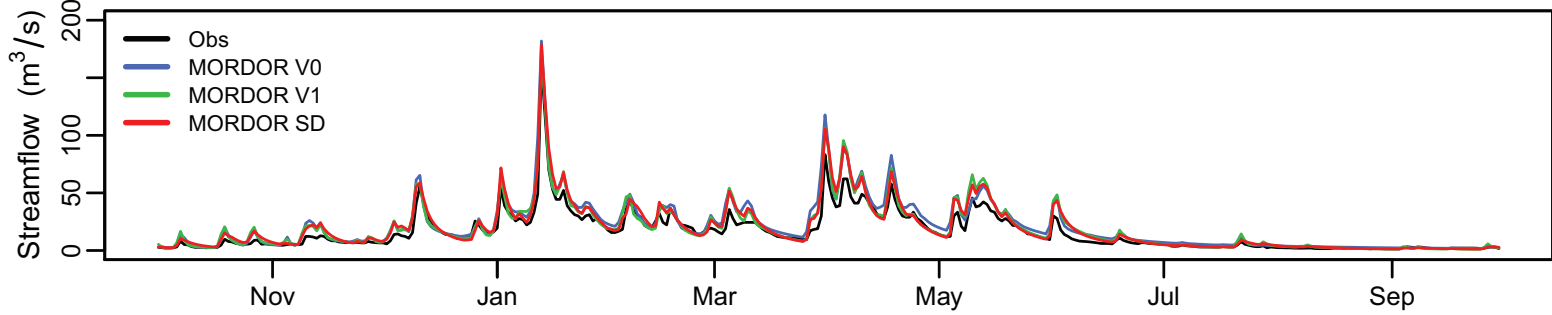

# Sioule@Fades

Year 1963

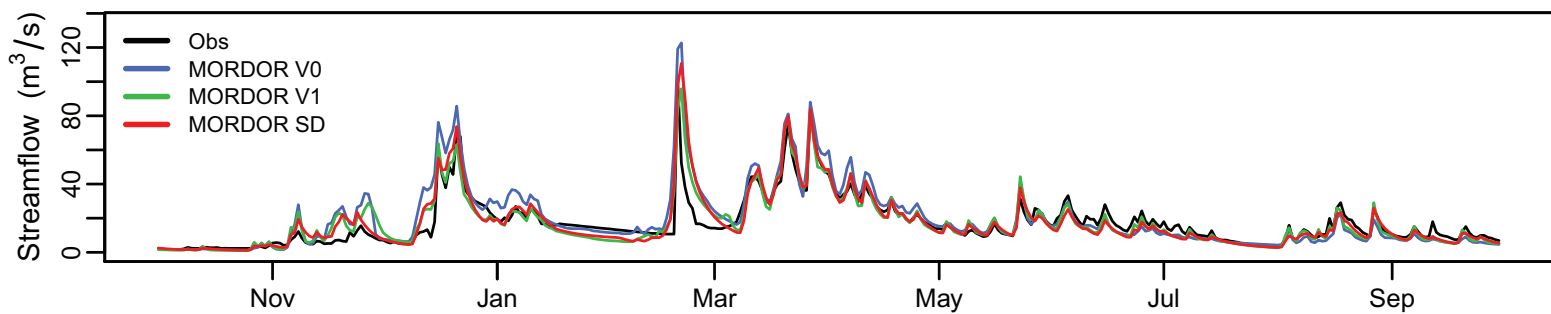

Year 1964

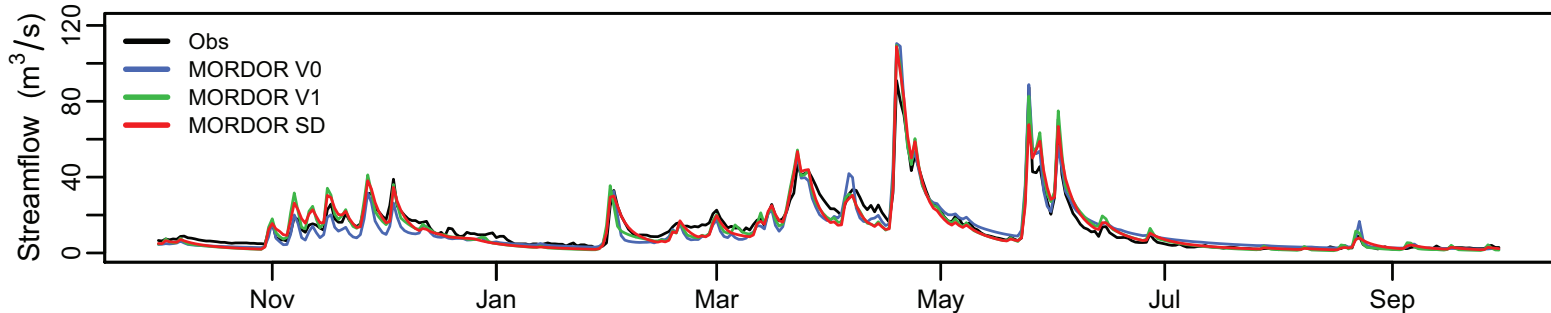

Year 1965

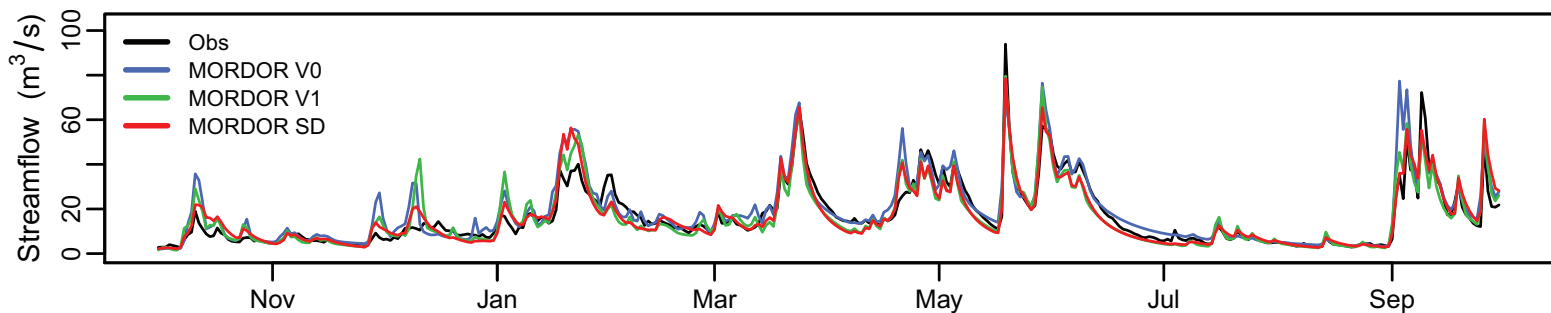

Year 1966

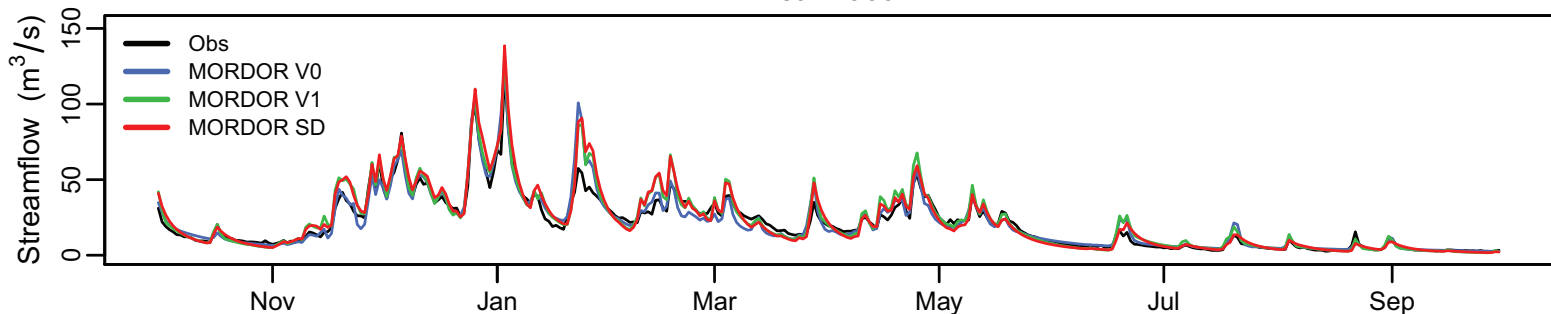

Year 1967

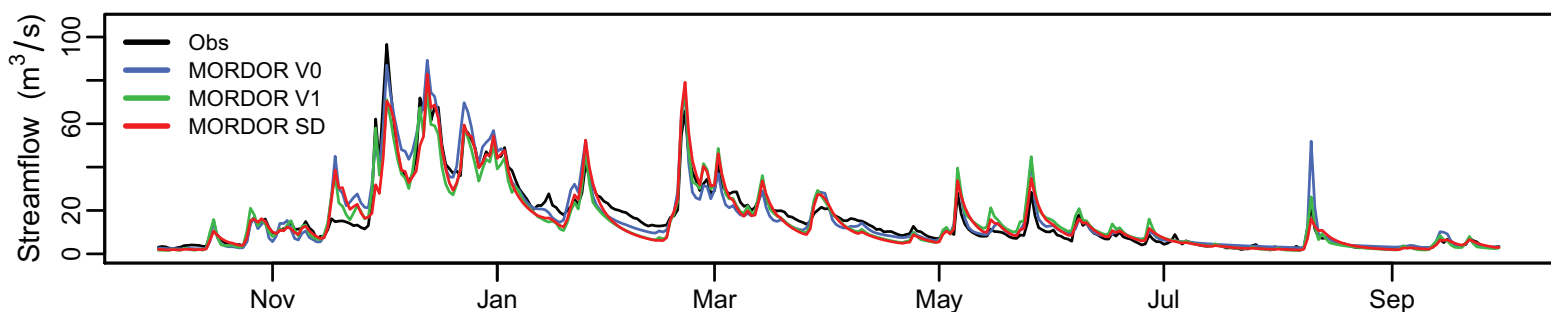

Year 1968

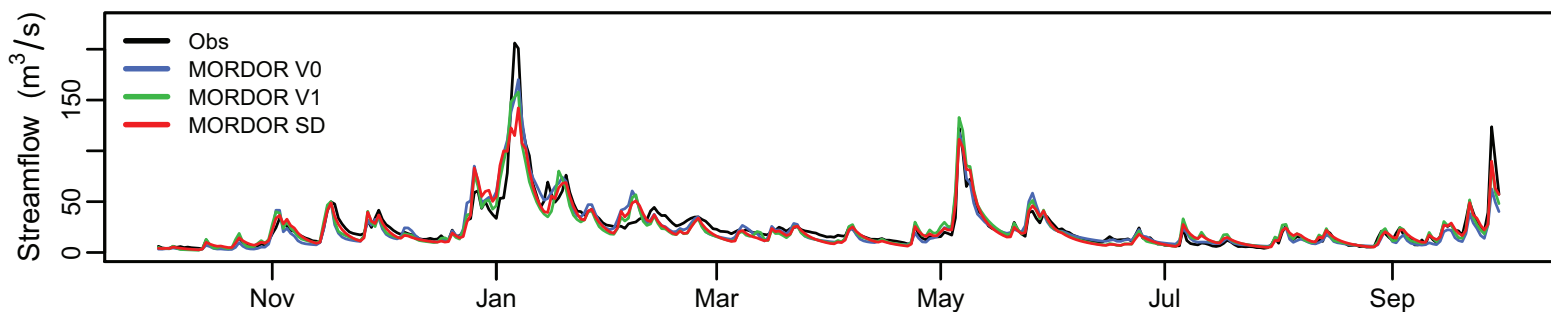

# Sioule@Fades

Year 1969

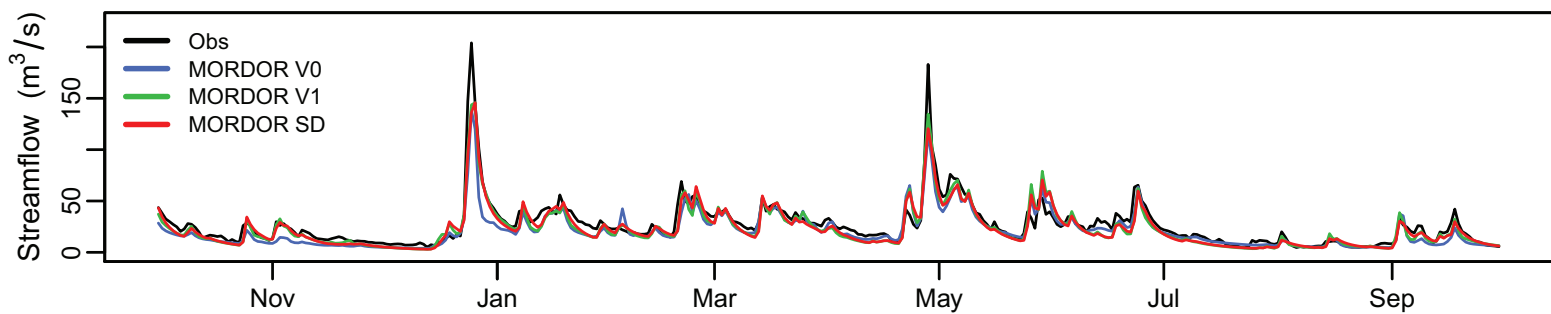

Year 1970

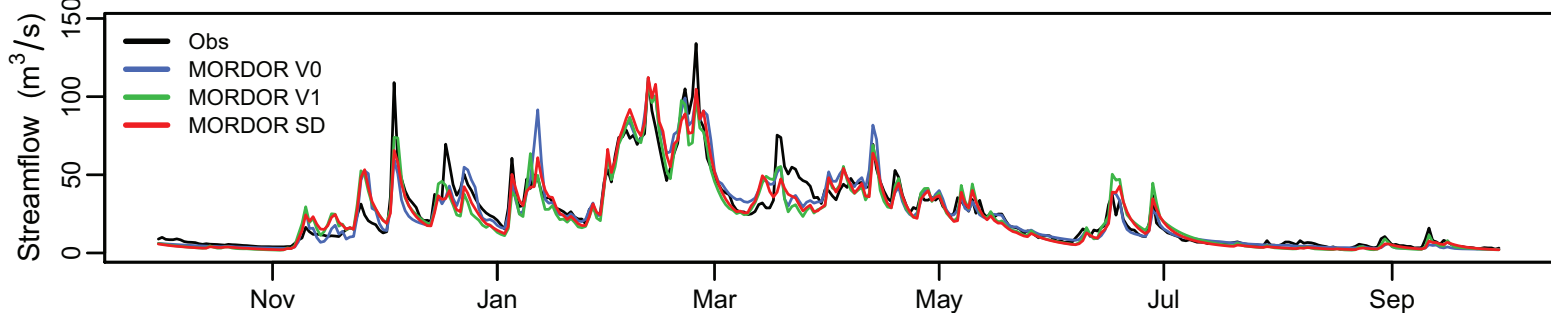

Year 1971

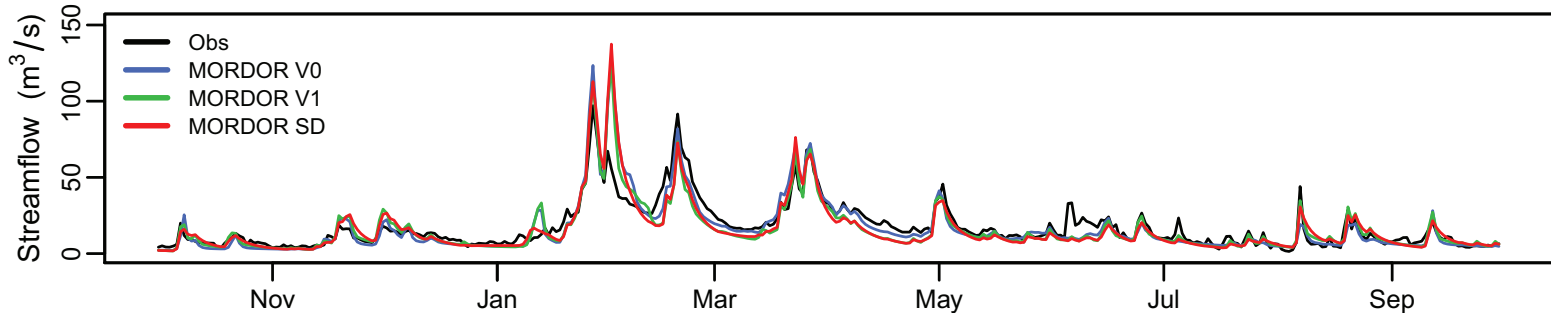

Year 1972

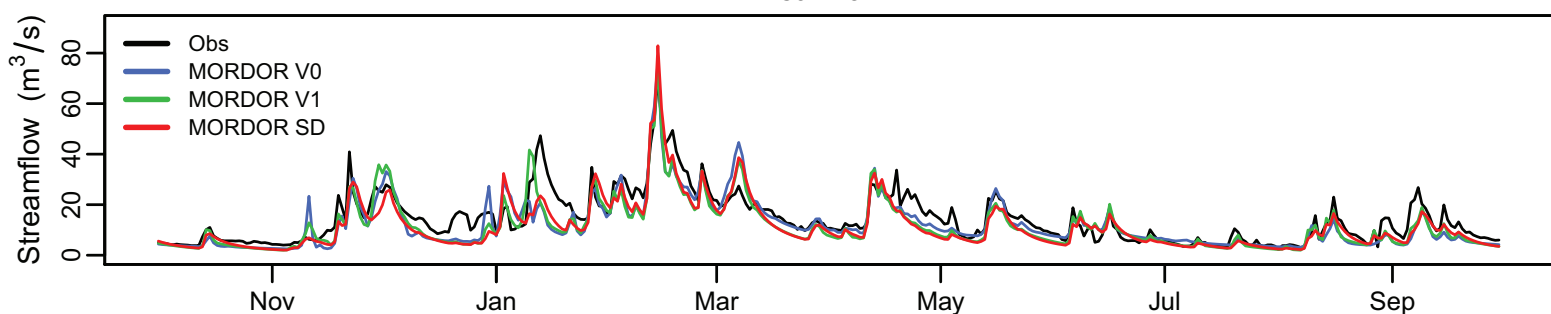

Year 1973

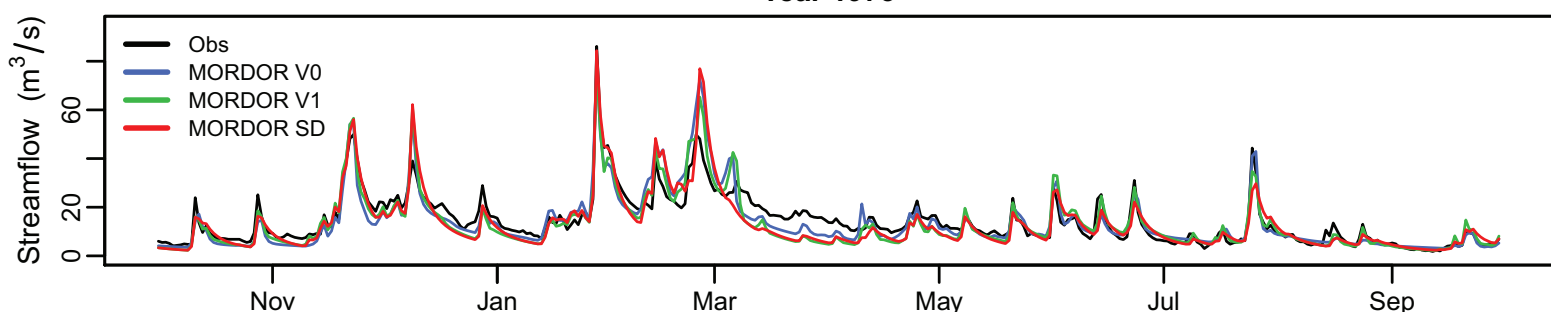

Year 1974

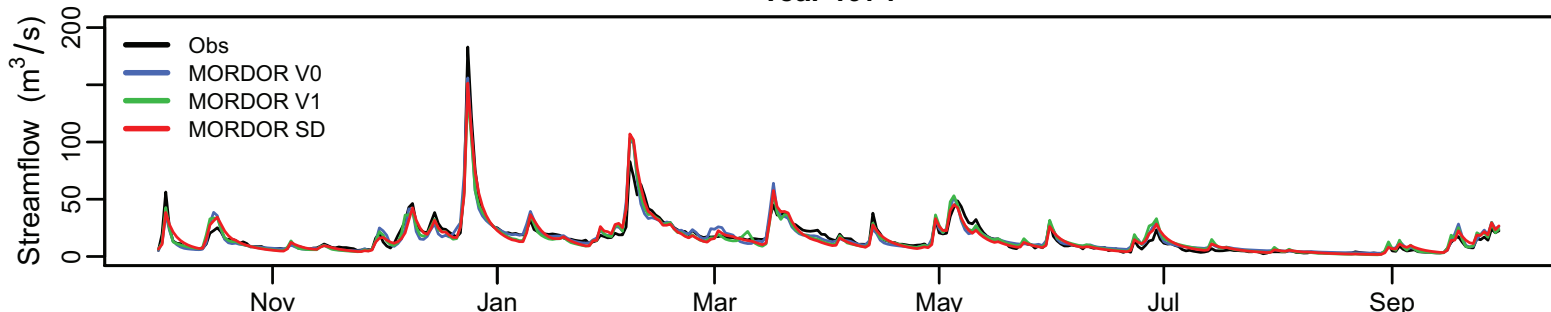

# Sioule@Fades

Year 1975

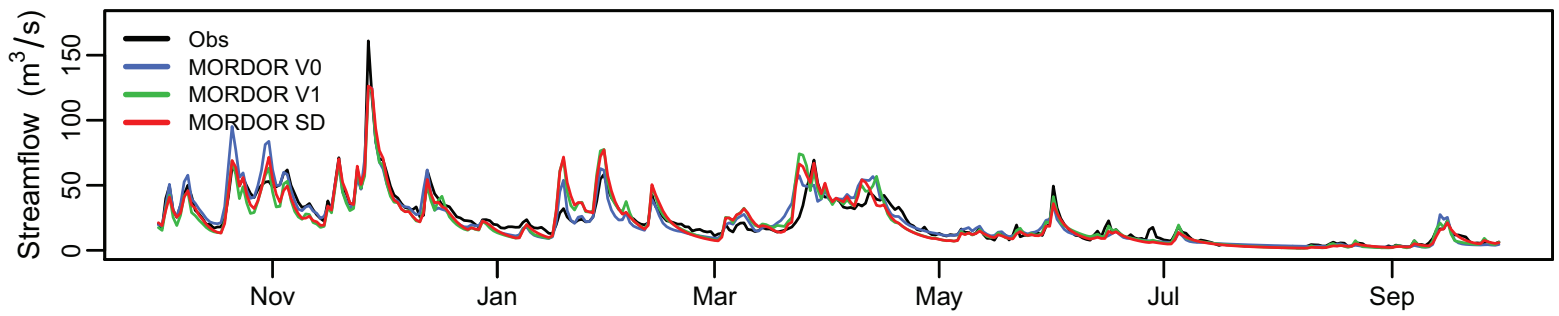

Year 1976

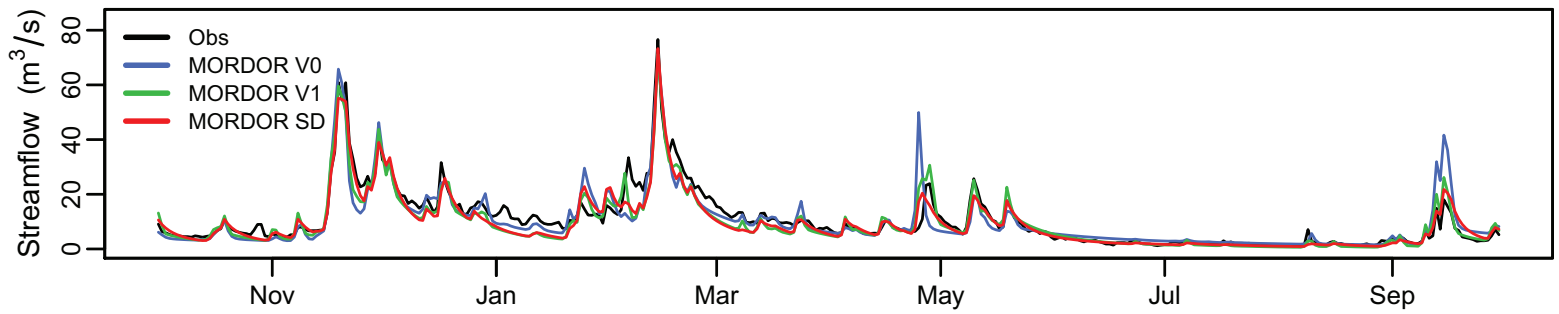

Year 1977

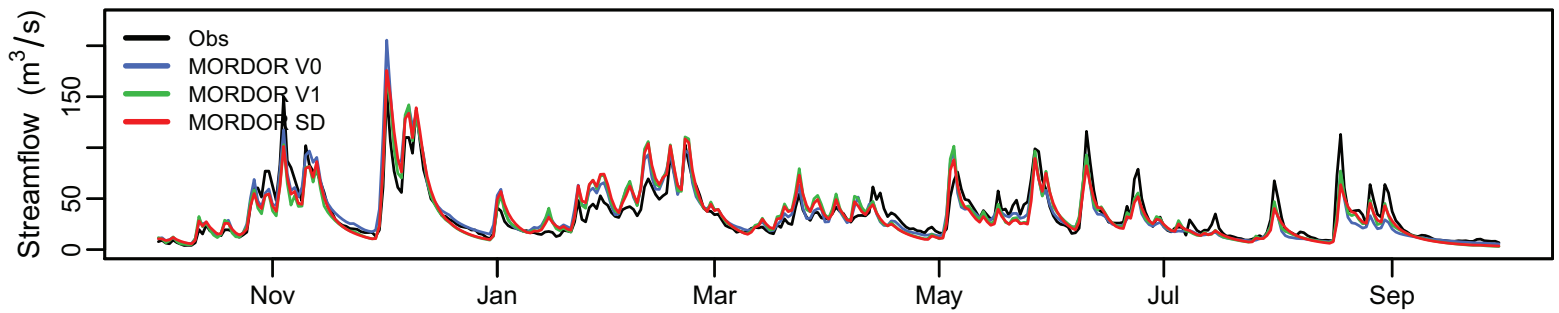

Year 1978

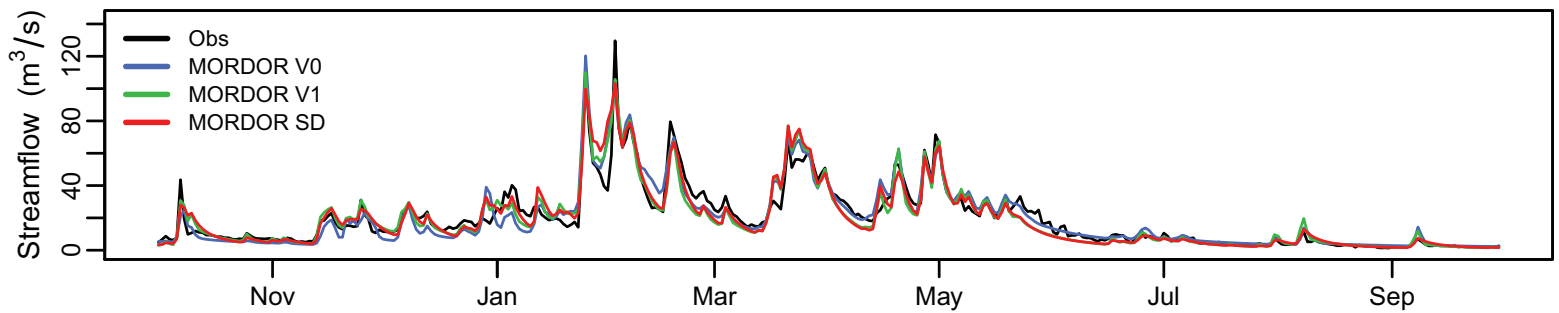

Year 1979

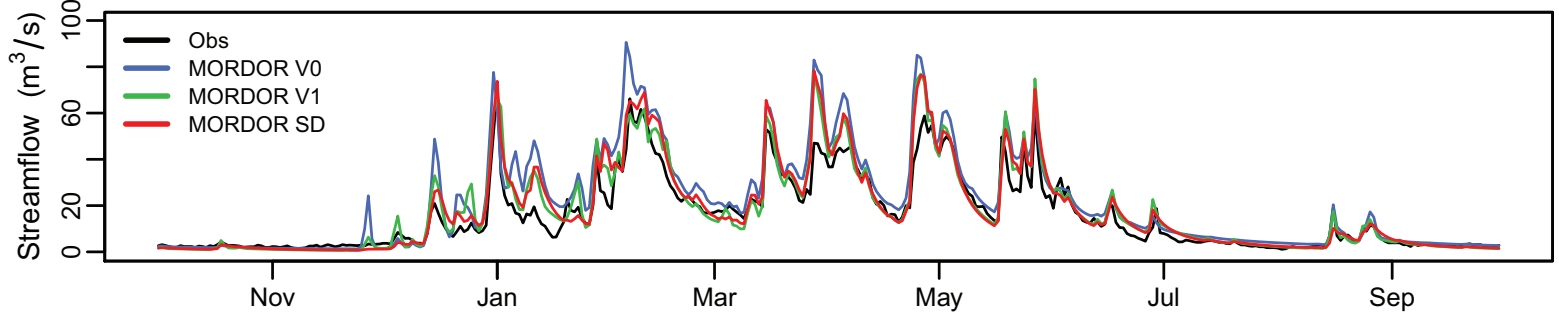

Year 1980

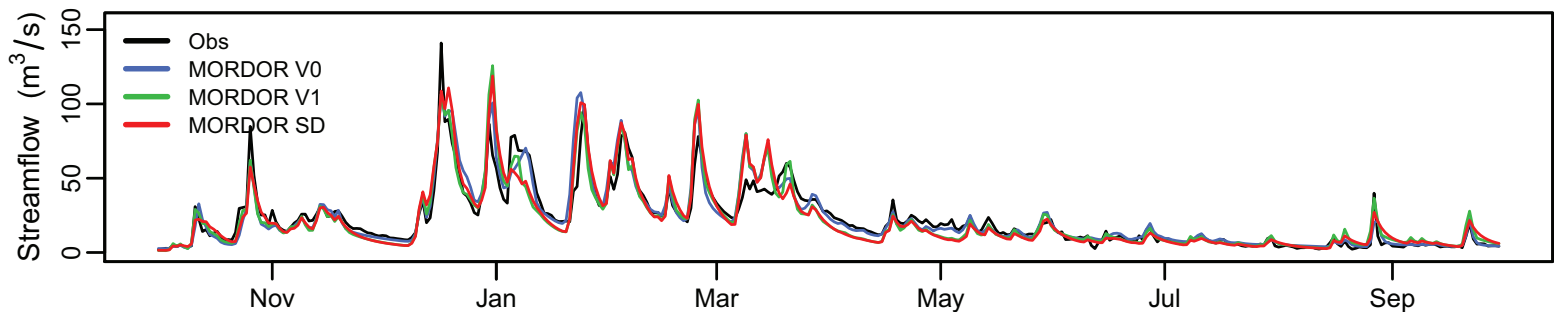

# Sioule@Fades

Year 1981

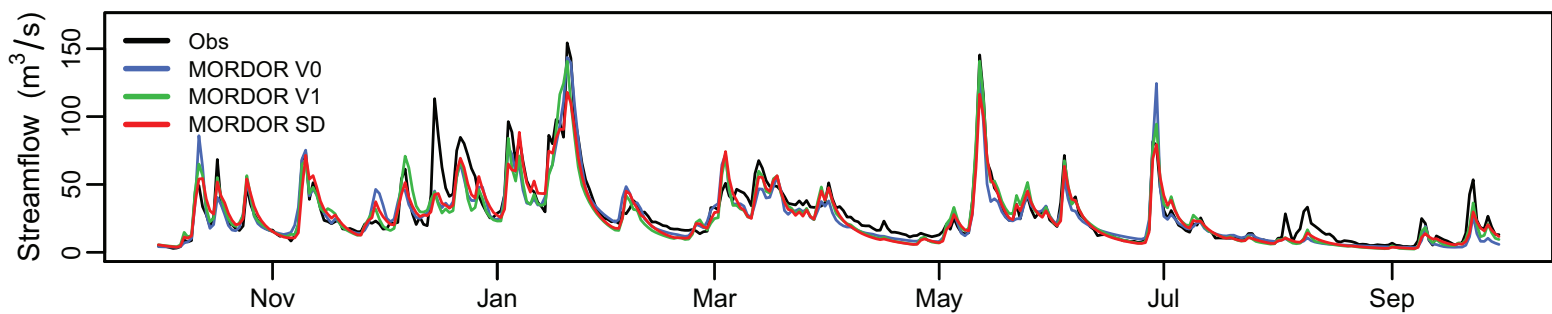

Year 1982

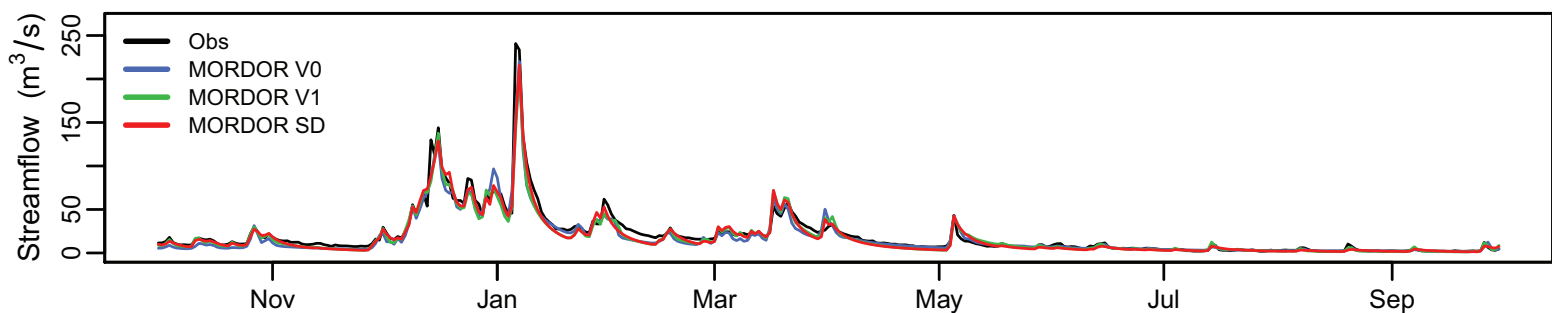

Year 1983

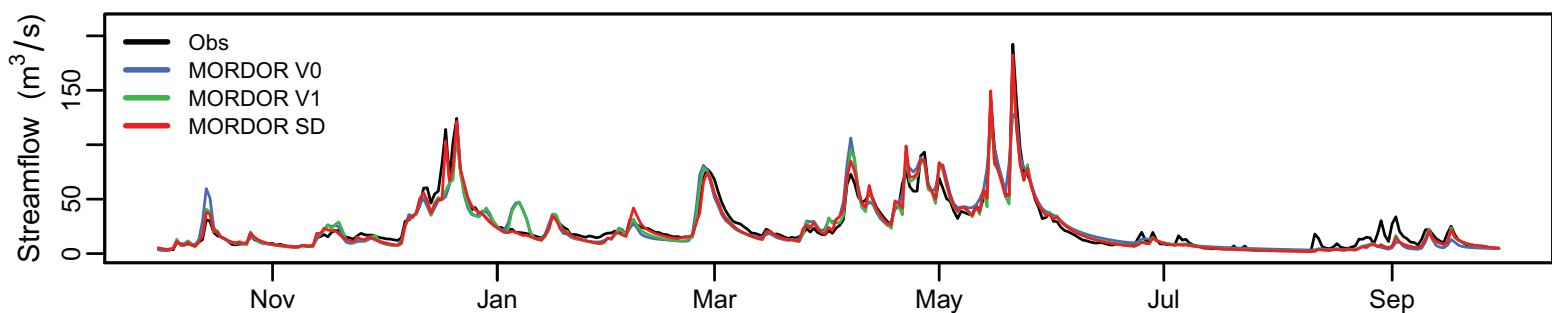

Year 1984

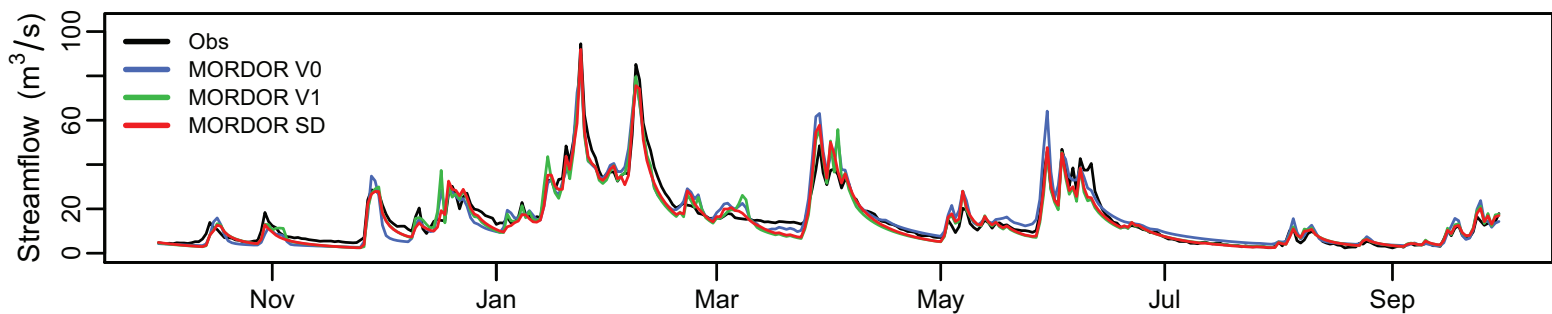

Year 1985

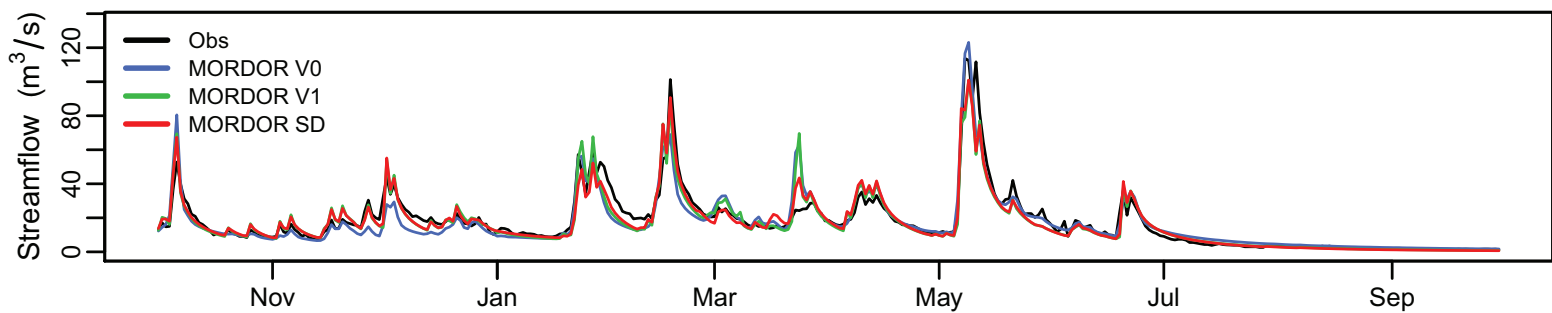

Year 1986

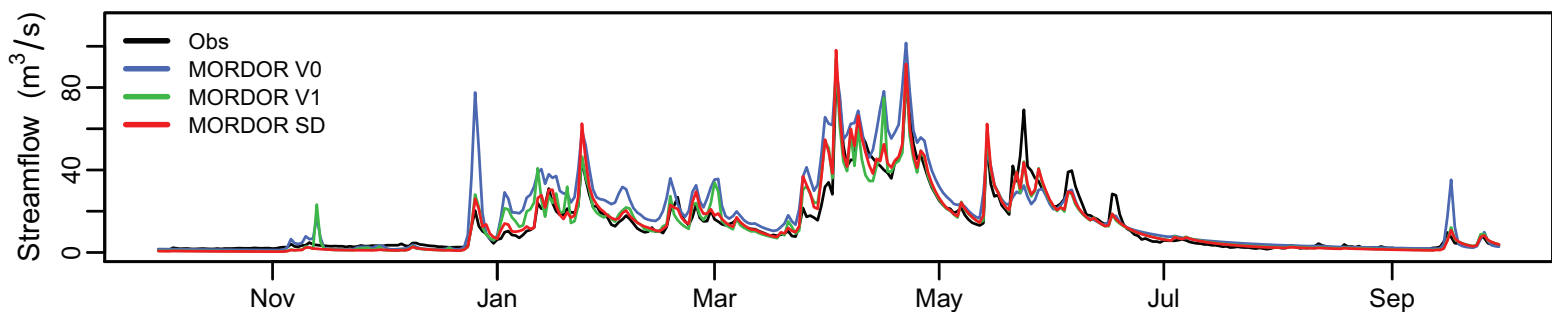

# Sioule@Fades

Year 1987

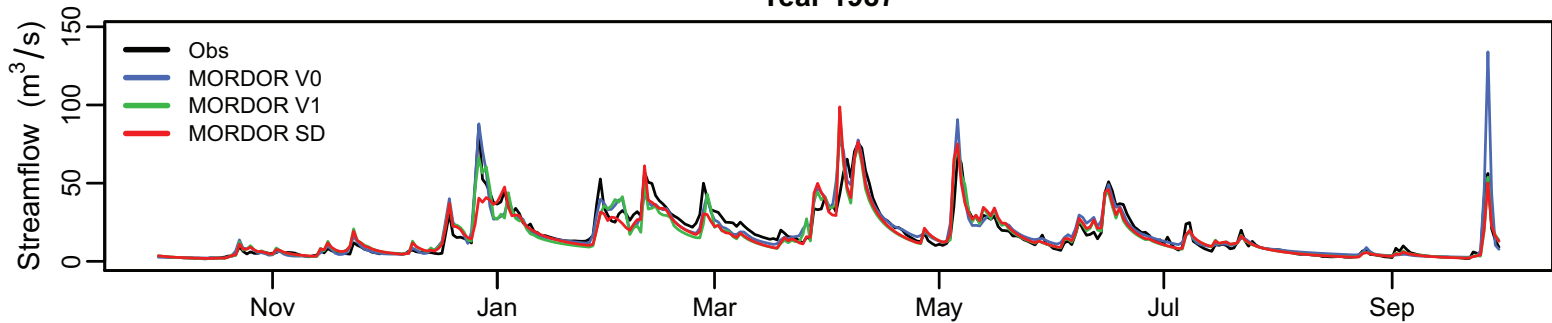

Year 1988

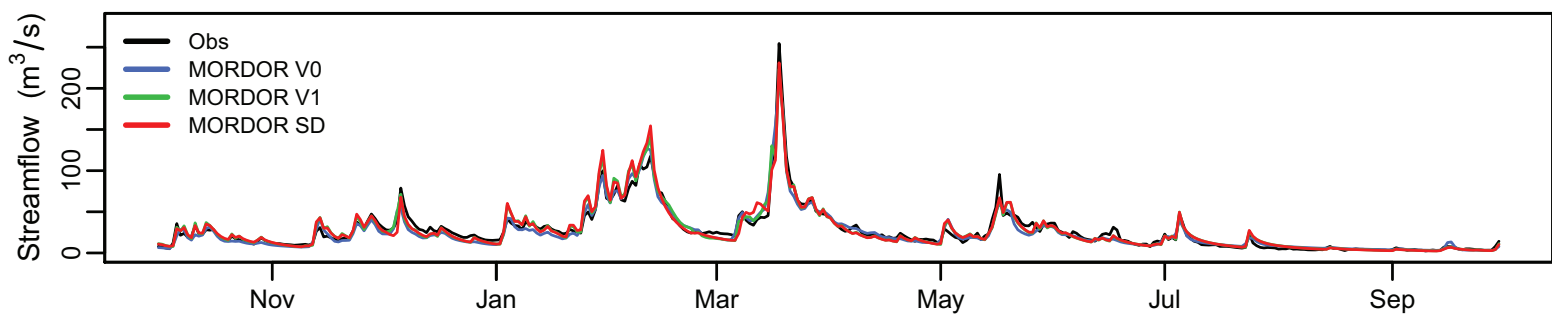

Year 1989

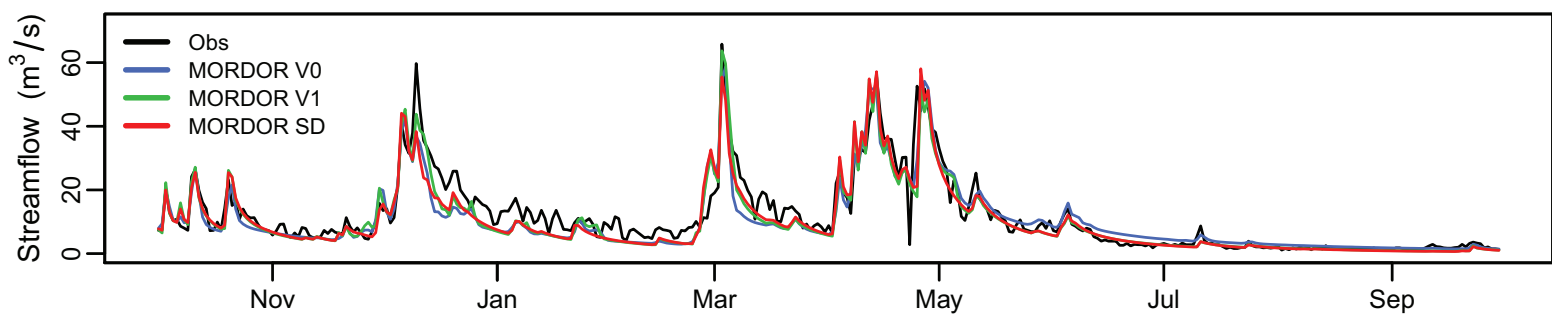

Year 1990

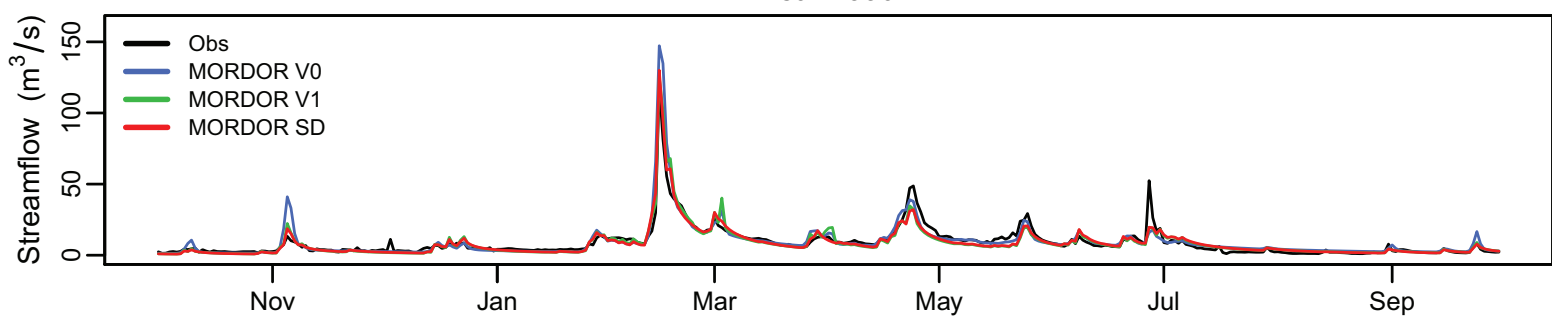

Year 1991

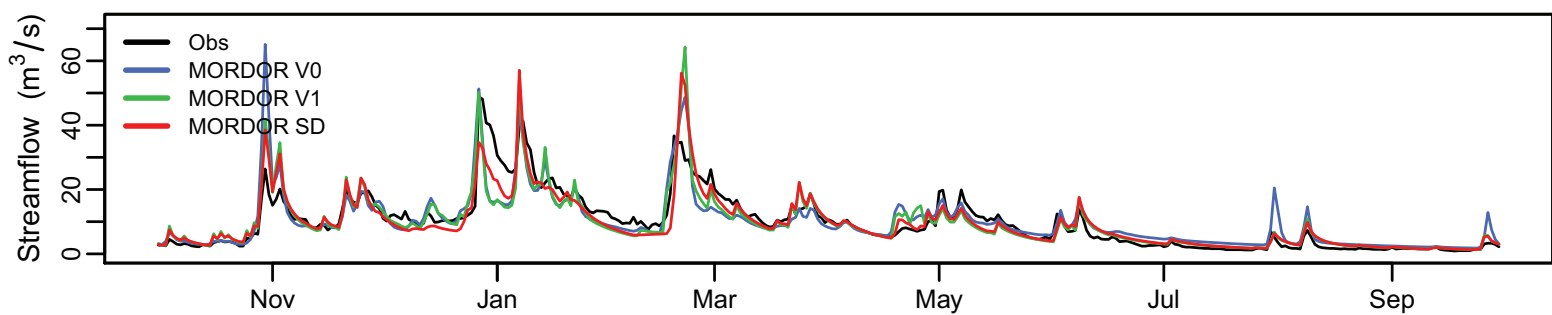

Year 1992

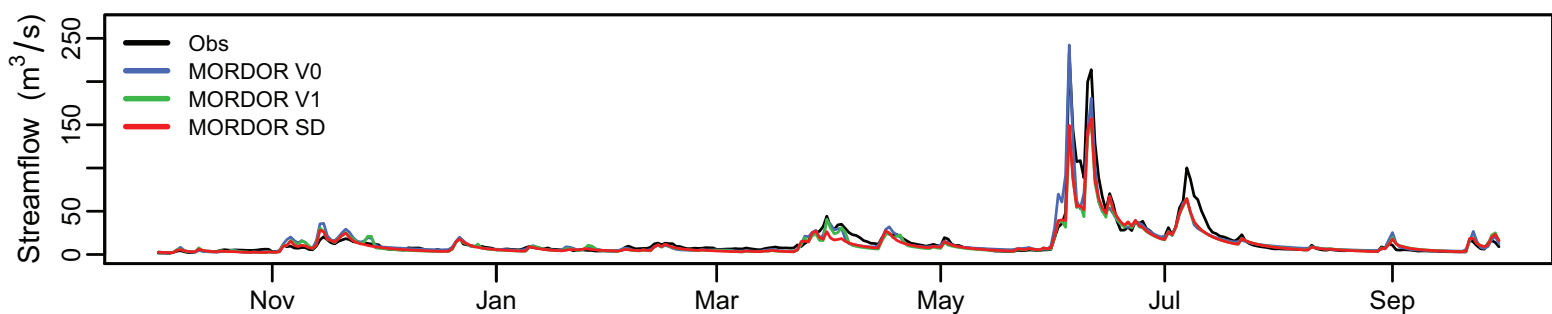

# Sioule@Fades

Year 1993

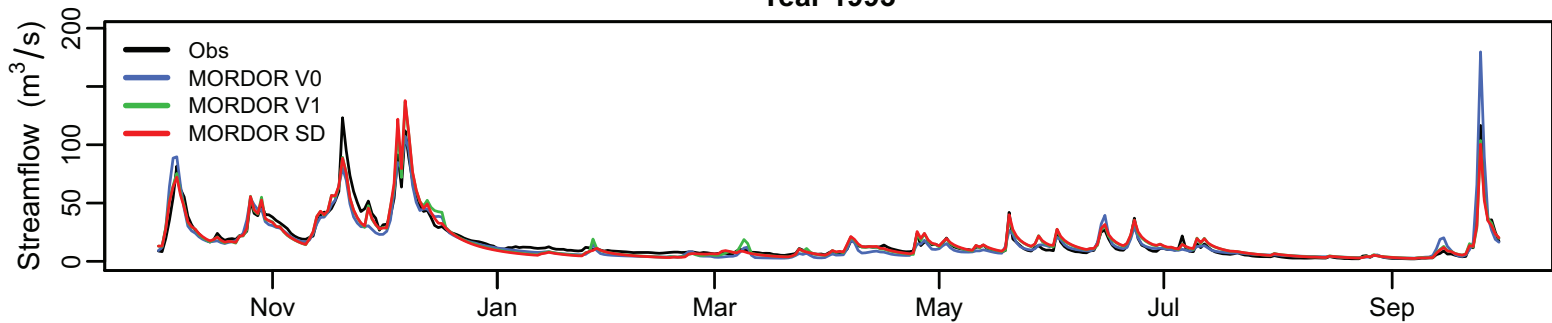

Year 1994

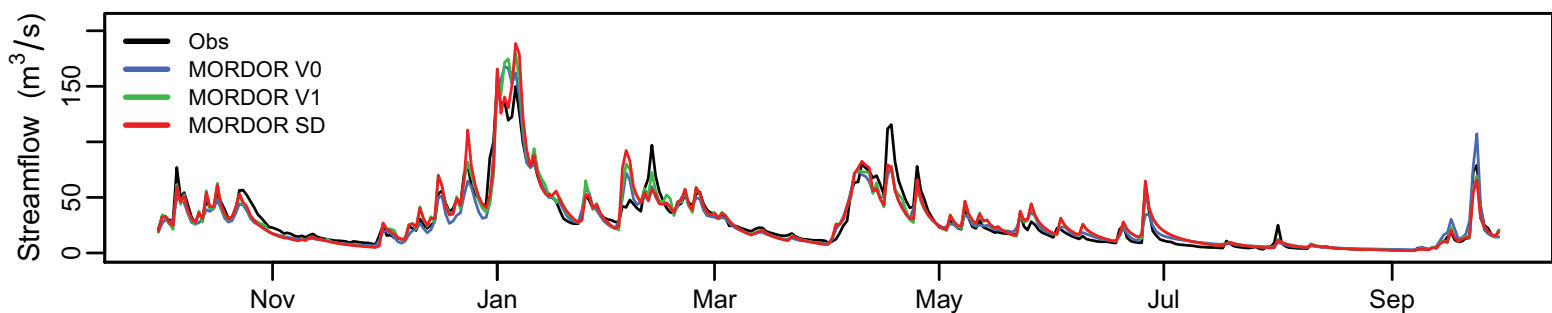

Year 1995

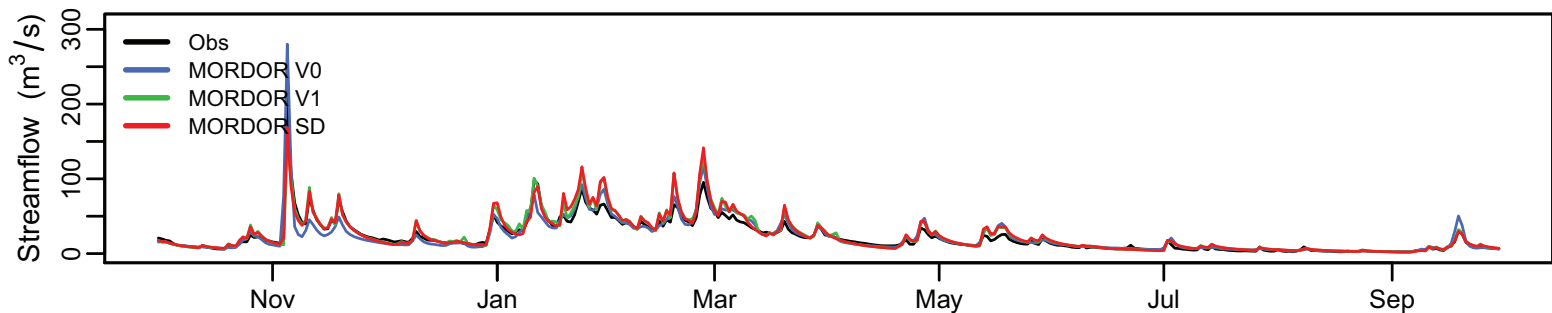

Year 1996

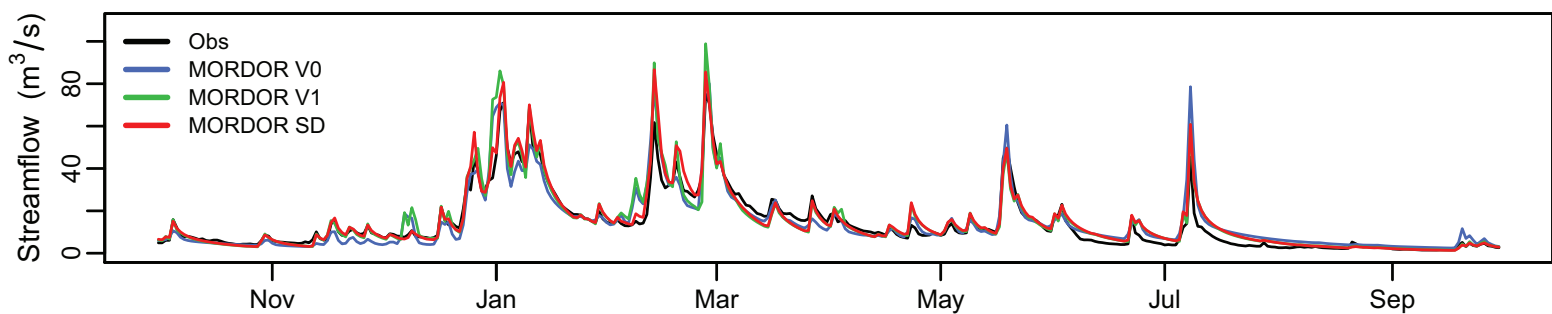

Year 1997

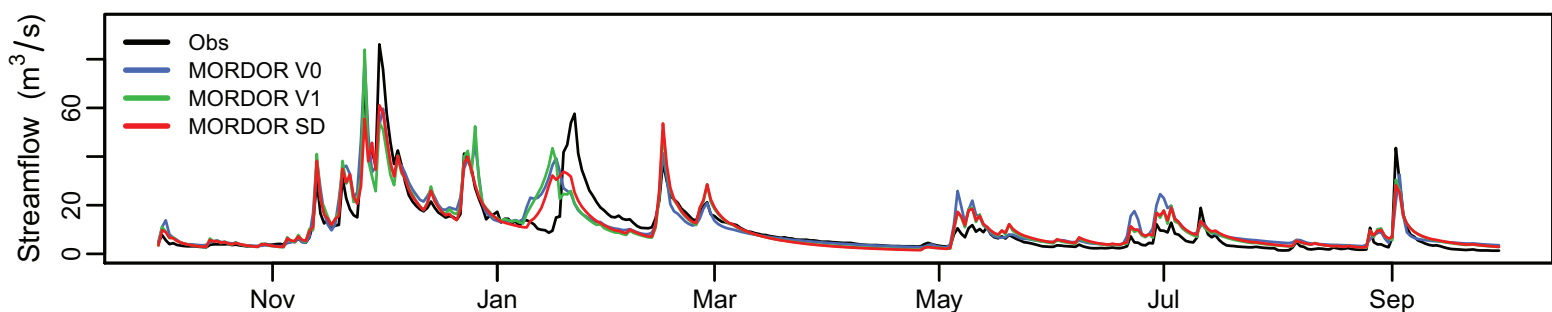

Year 1998

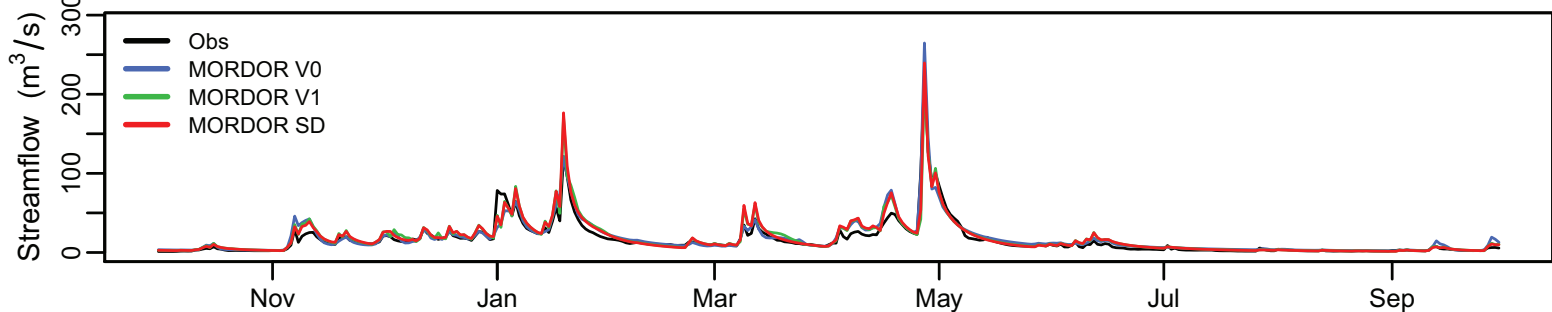

# Sioule@Fades

Year 1999

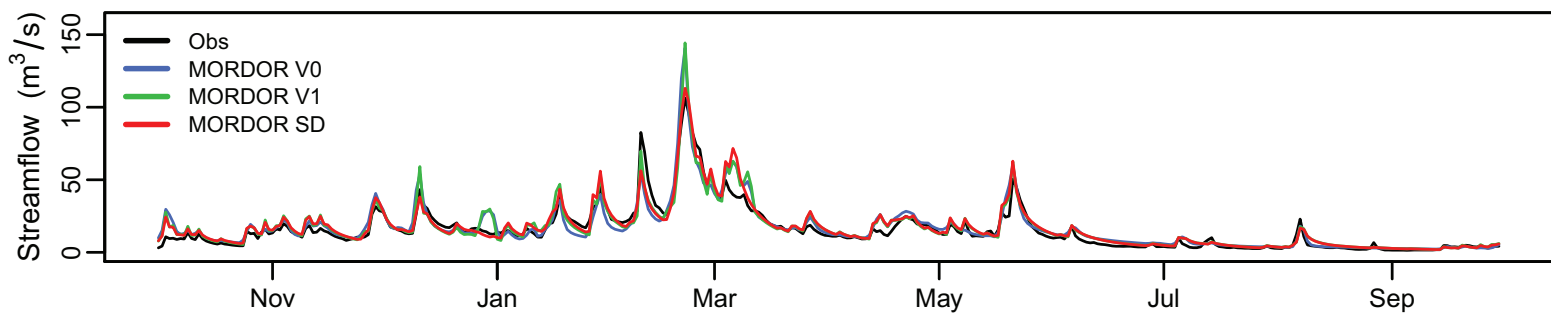

Year 2000

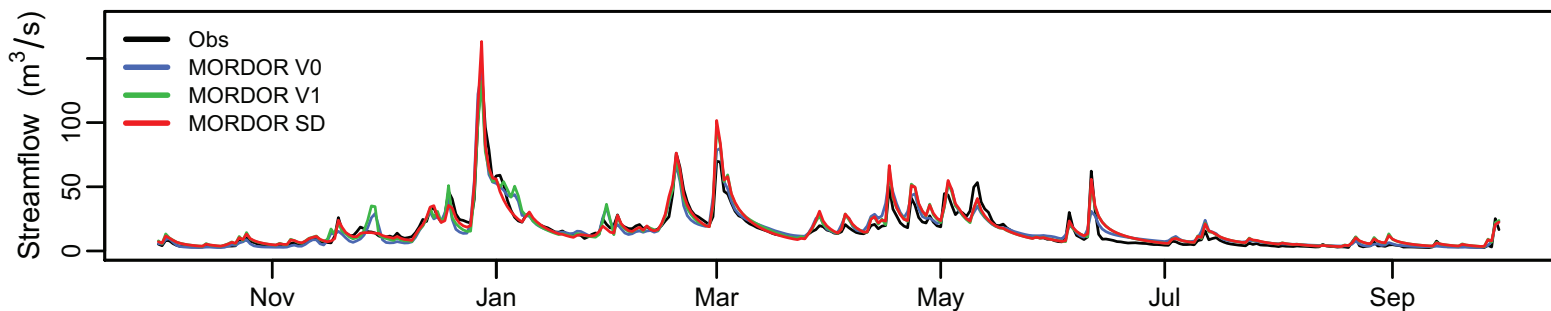

Year 2001

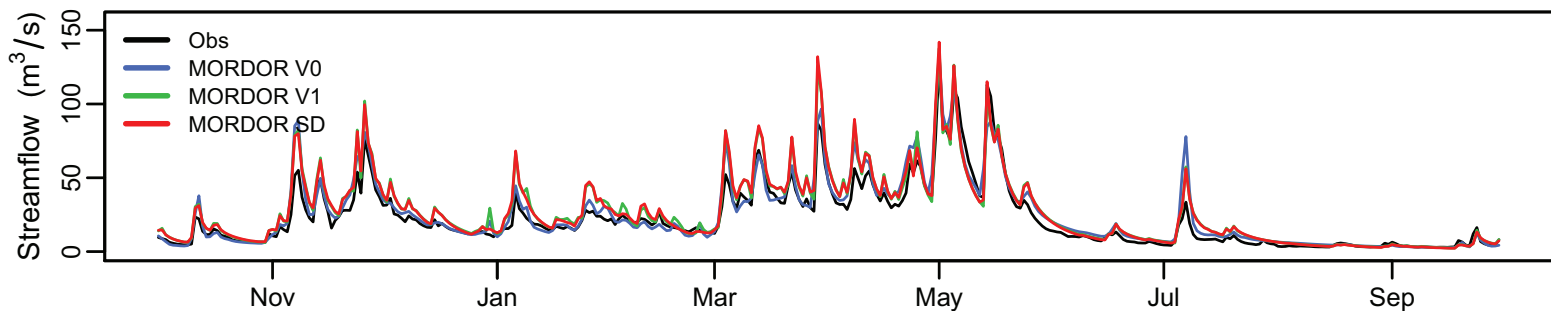

Year 2002

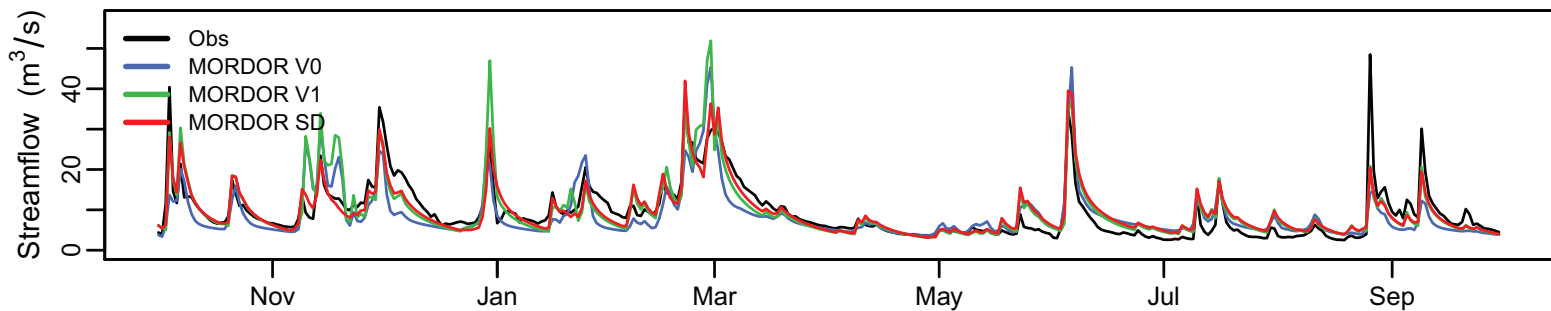

Year 2003

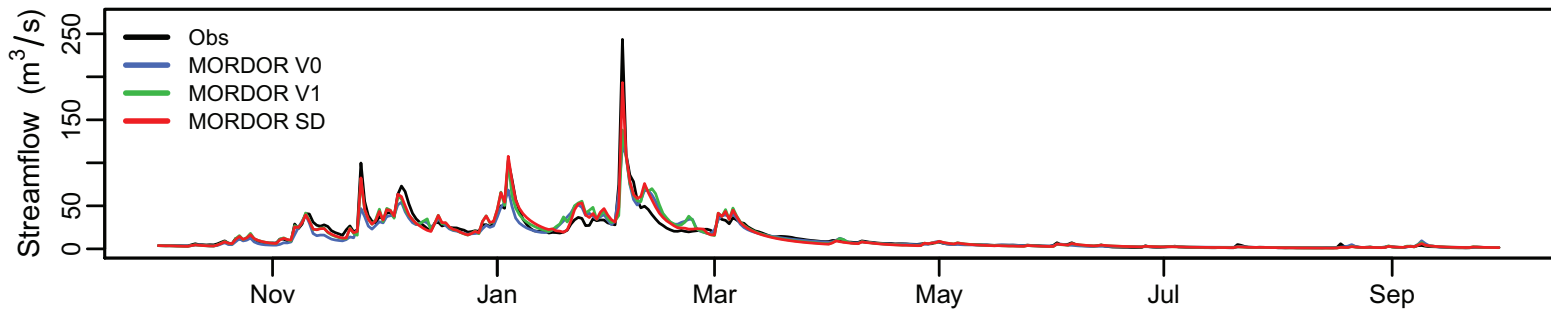

Year 2004

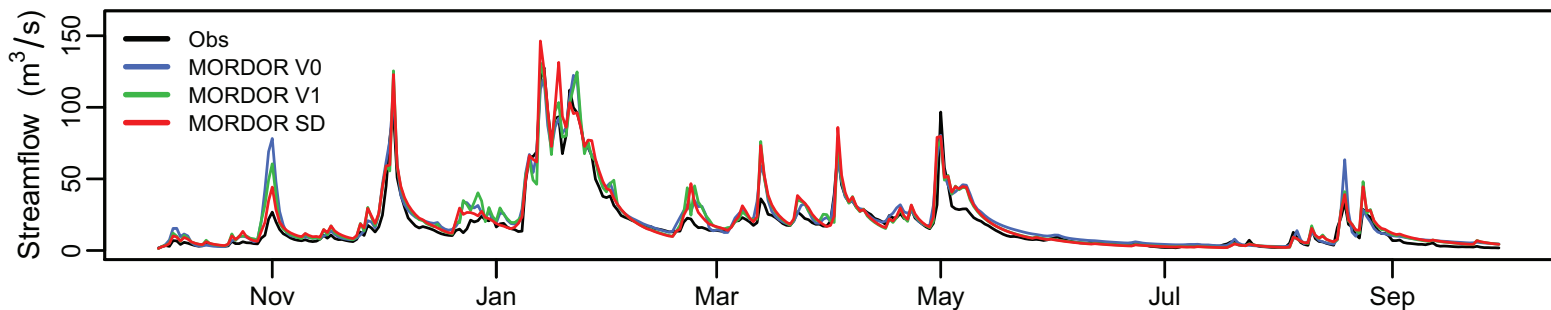



# Sioule@Fades

Year 2005

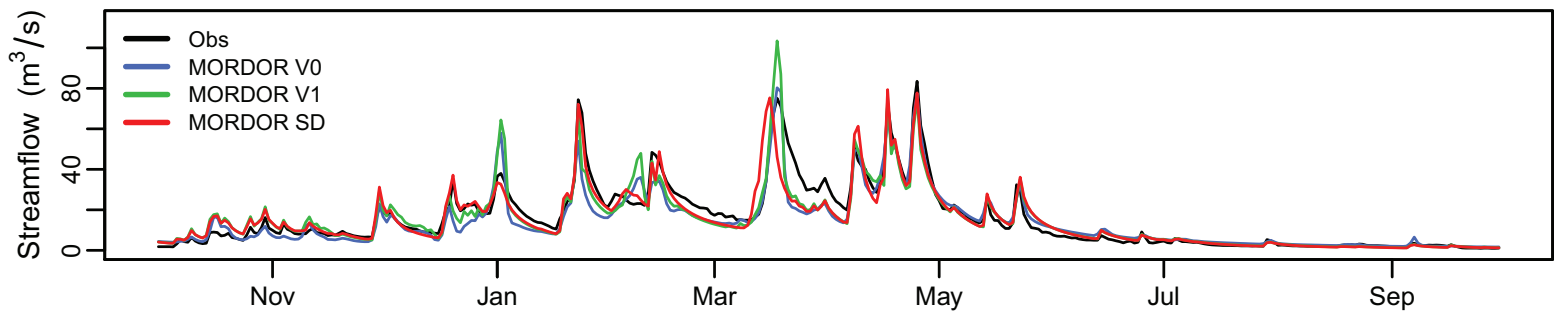

Year 2006

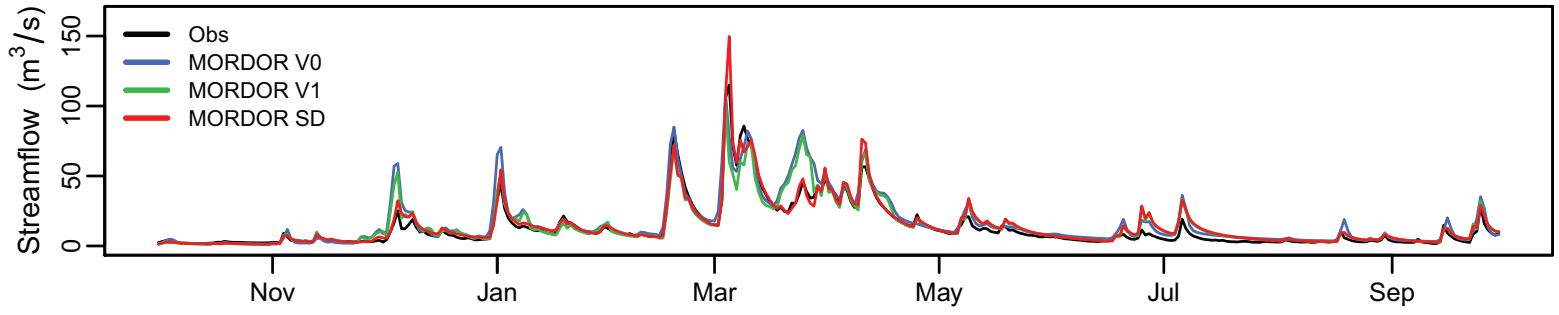

Year 2007

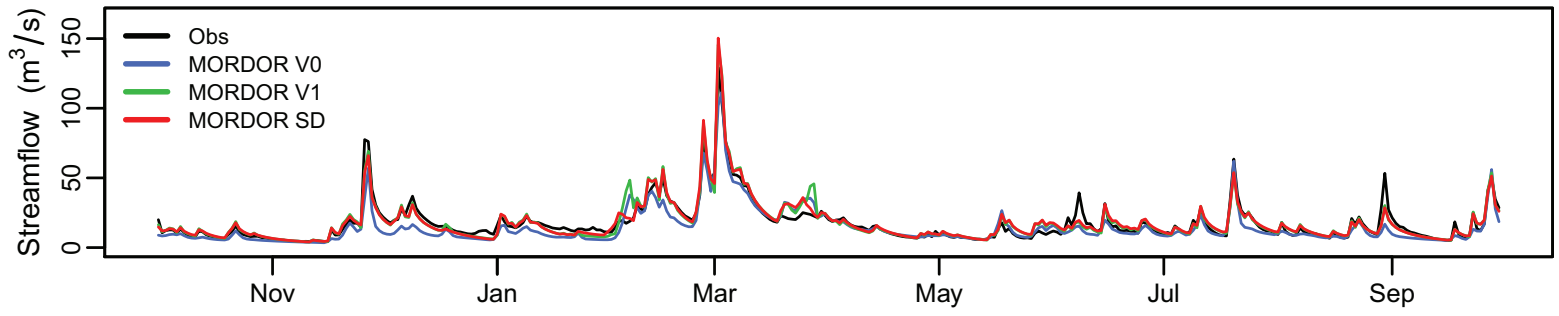

Year 2008

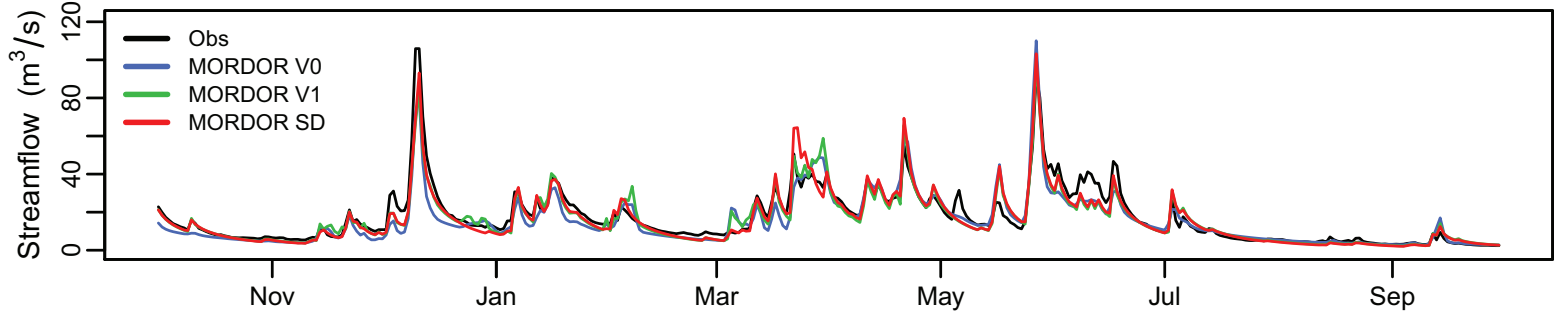

# Souloise@Infernet

Year 1992

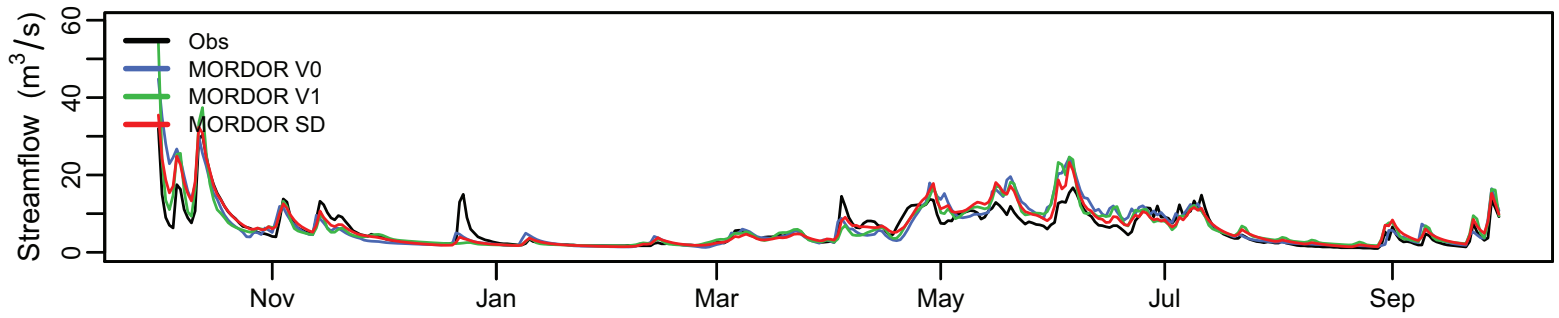

Year 1993

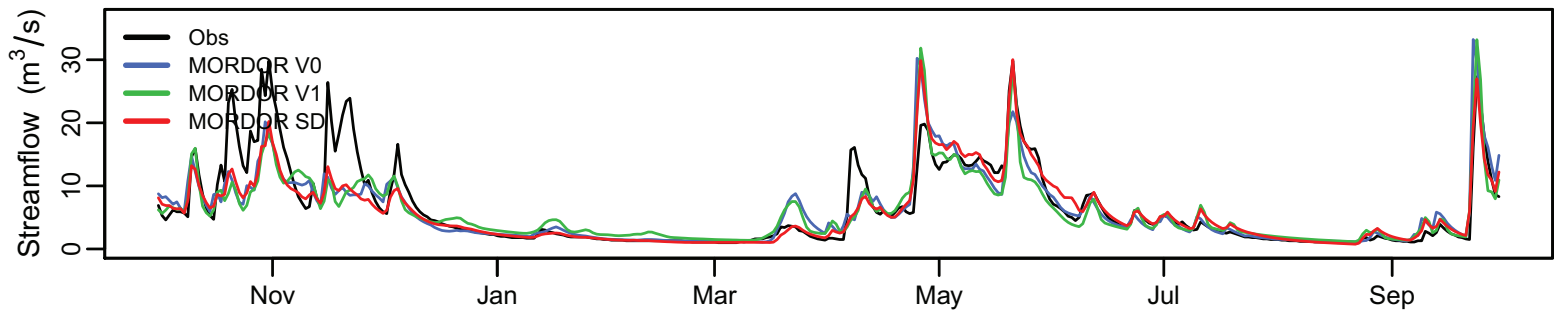

Year 1994

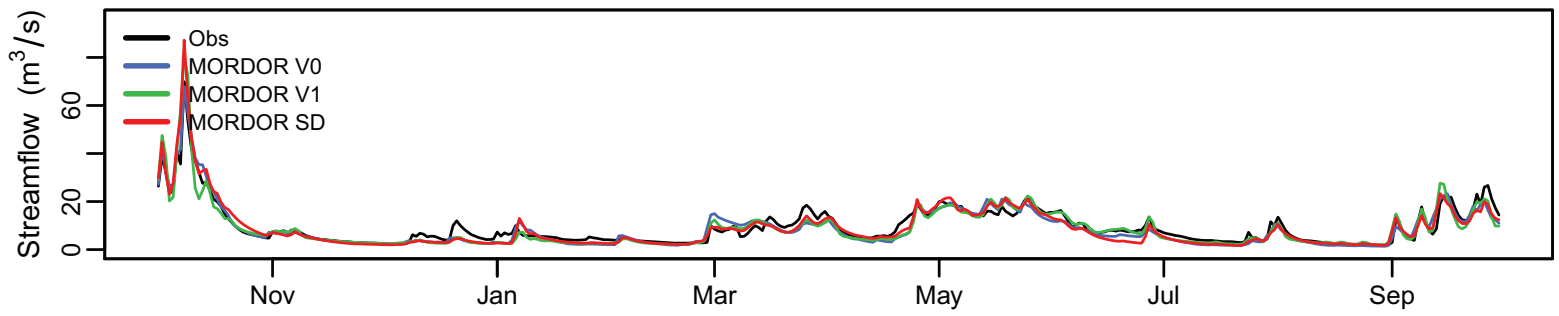

Year 1995

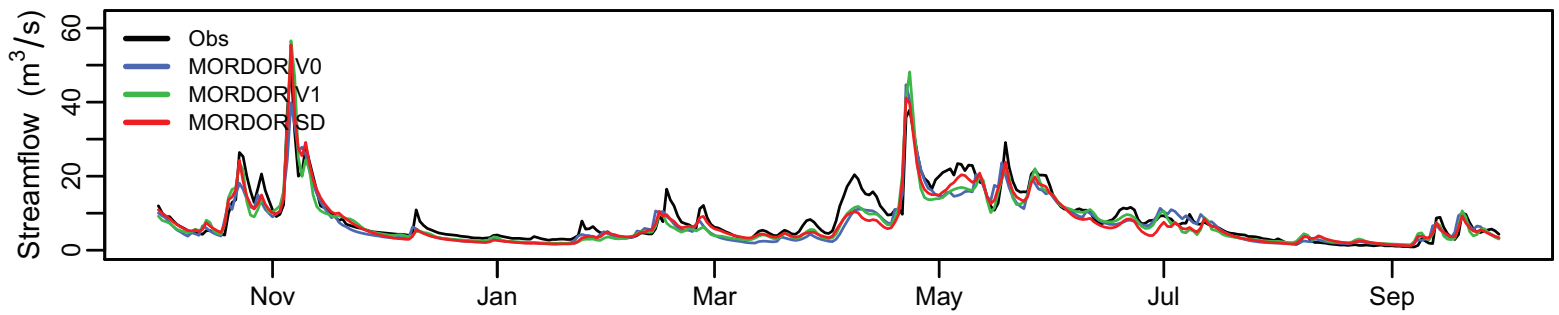

Year 1996

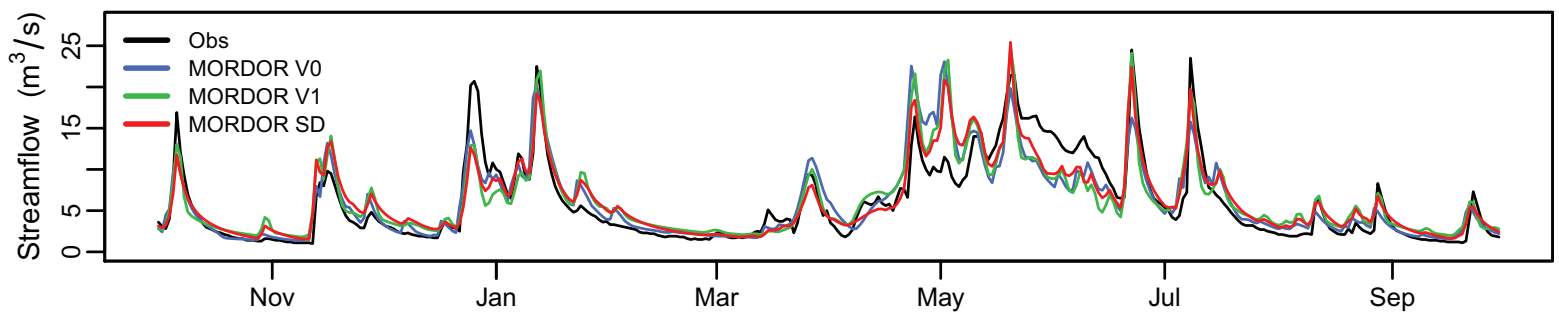

Year 1997

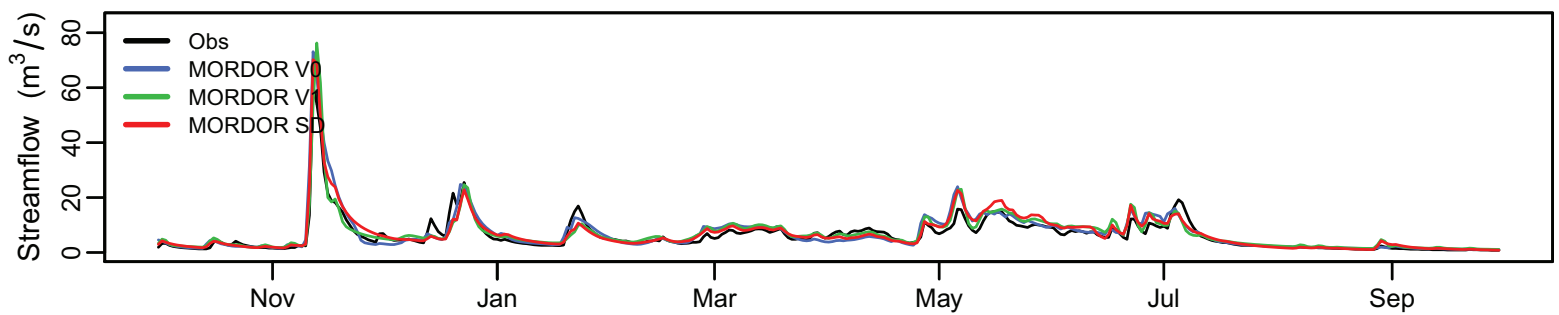

# Souloise@Infernet

Year 1998

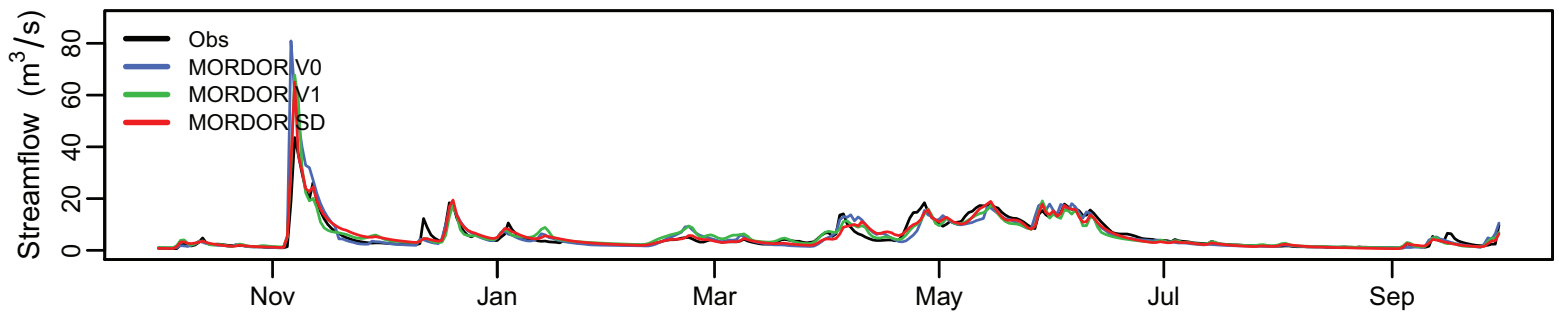

Year 1999

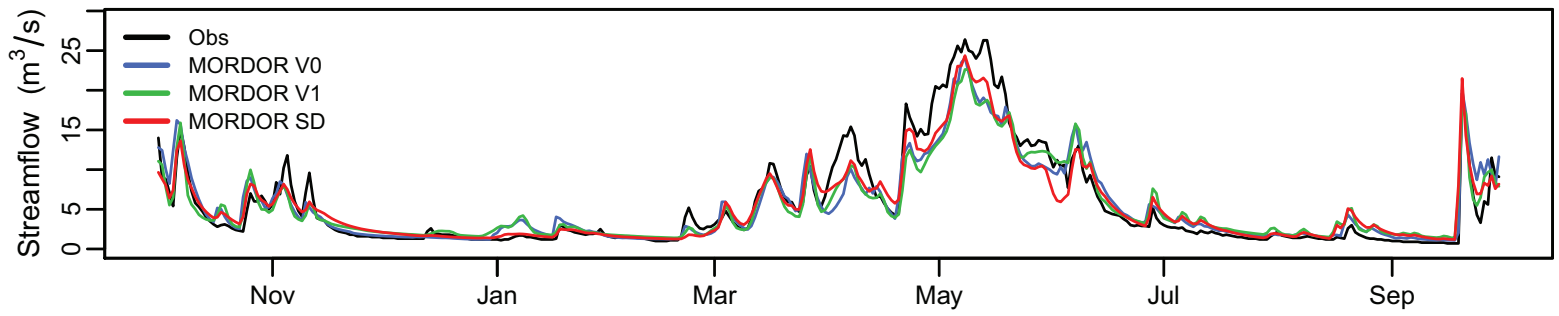

Year 2000

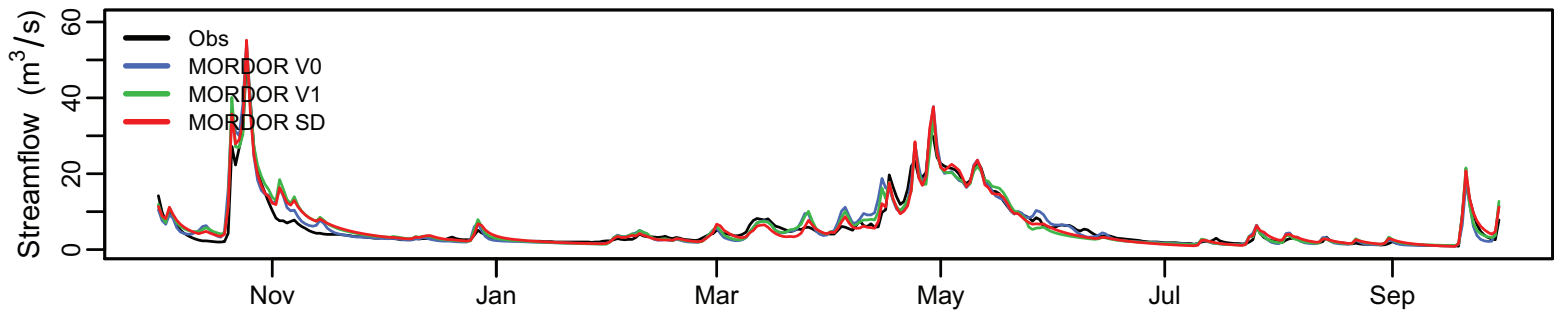

Year 2001

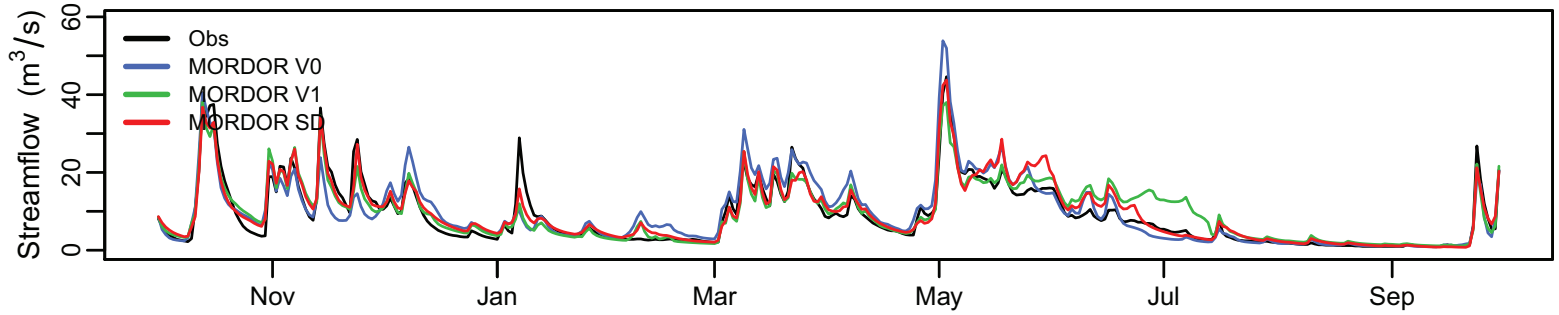

Year 2002

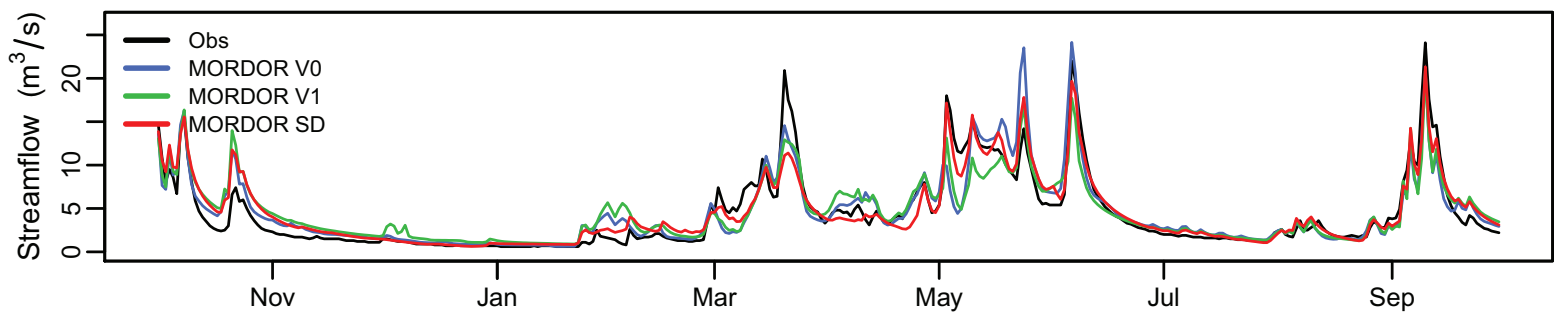

Year 2003

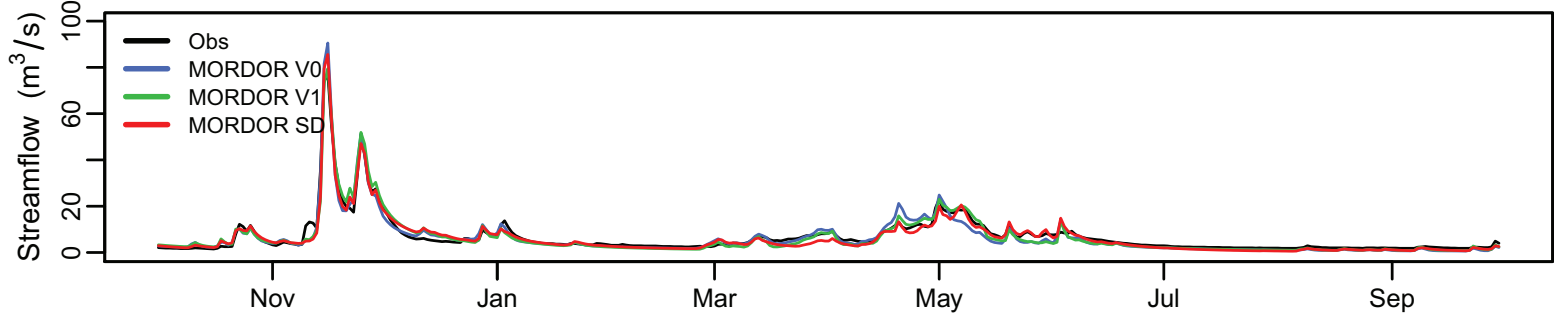

# Souloise@Infernet

Year 2004

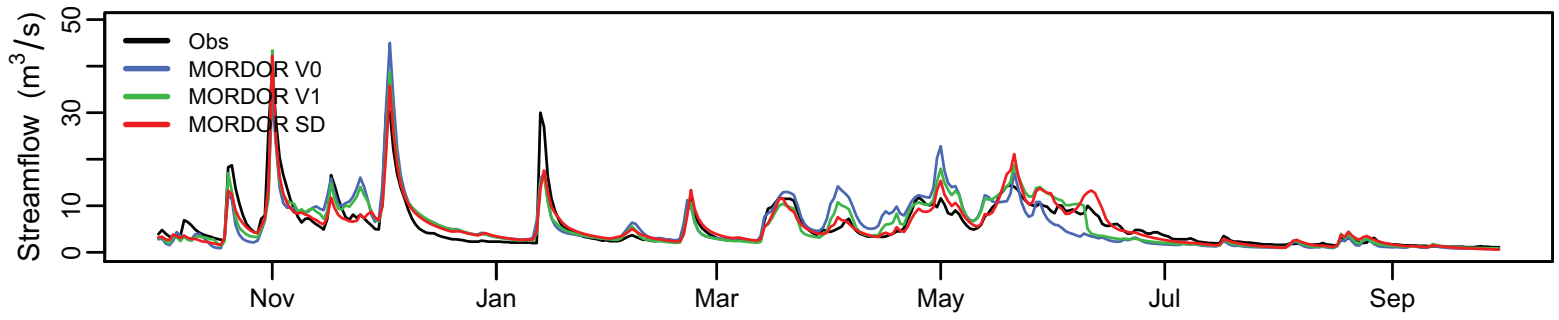

Year 2005

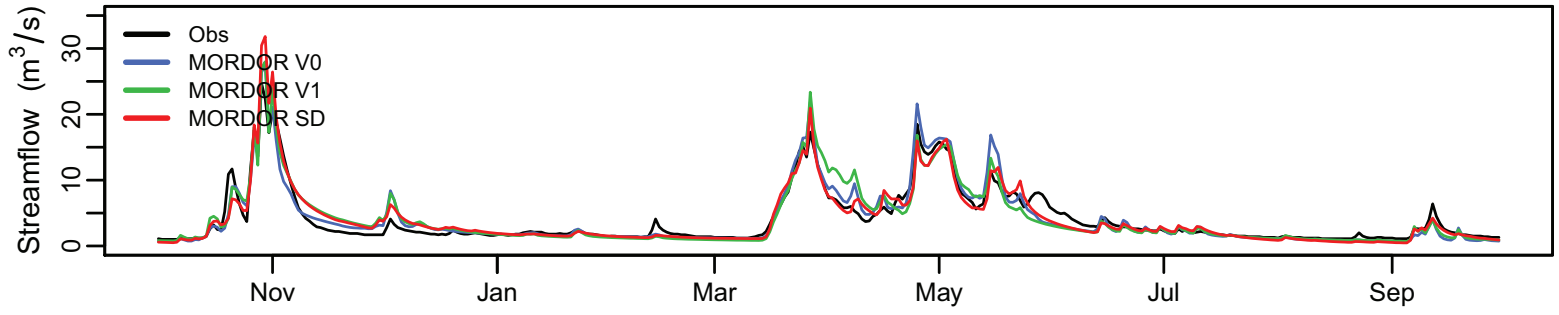

Year 2006

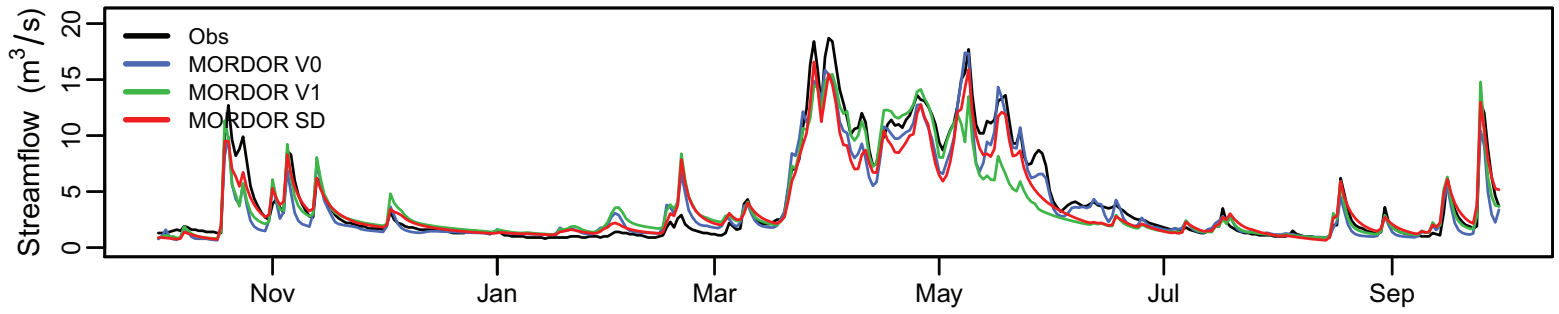

# Stura@Lanzo

Year 1955

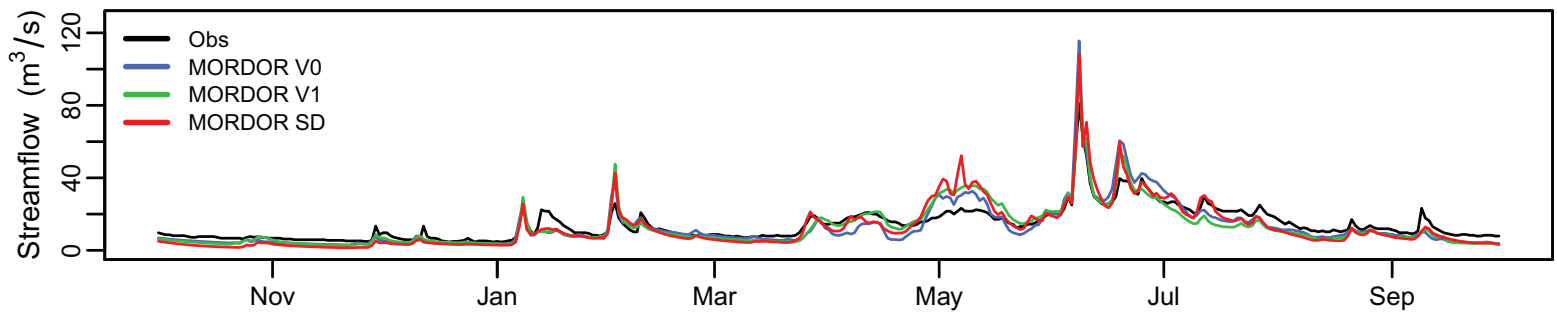

Year 1956

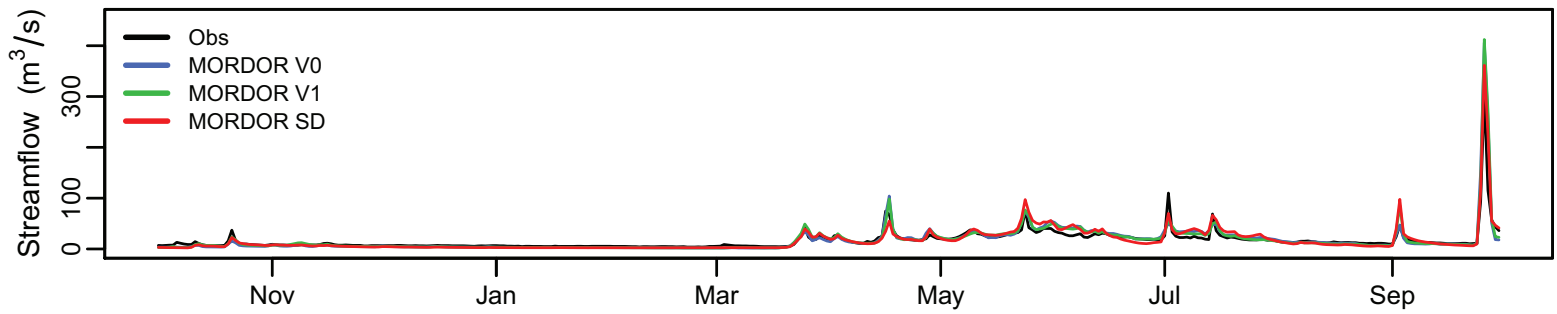

Year 1957

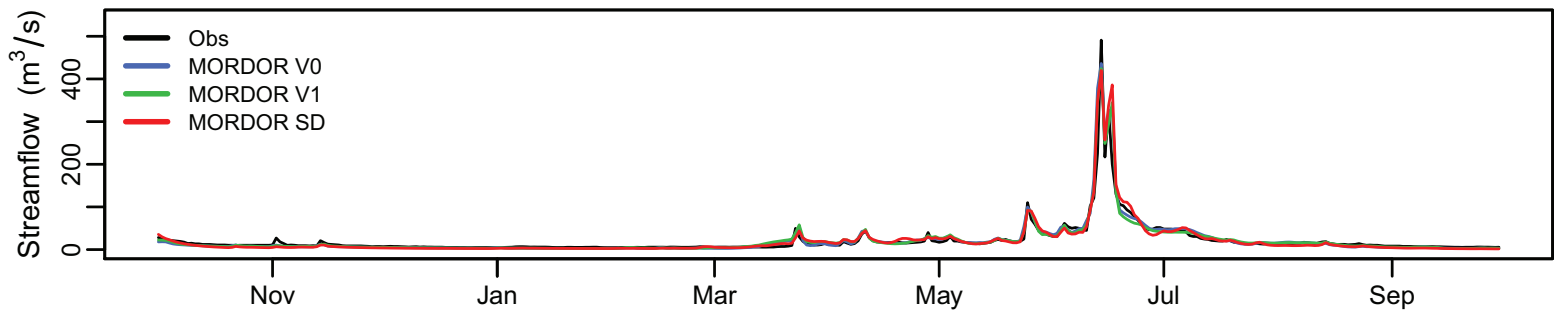

Year 1958

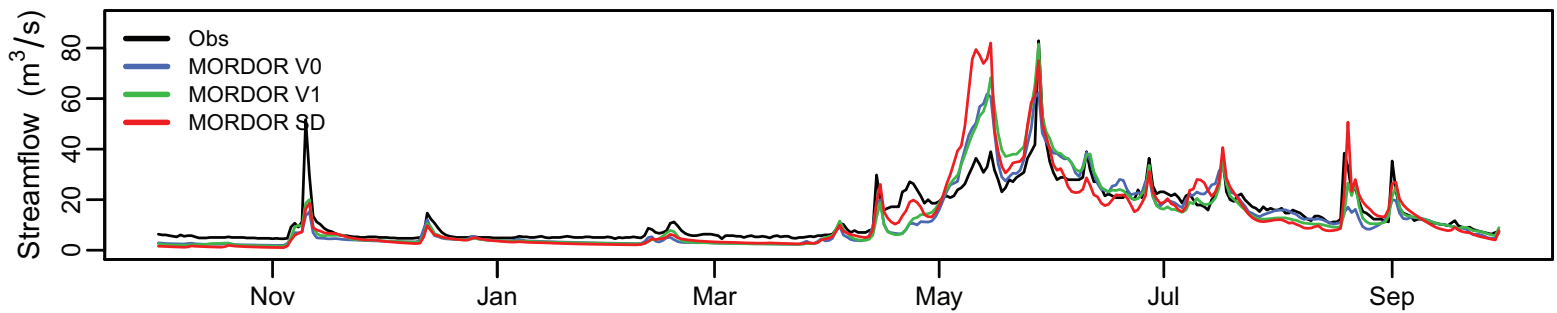

Year 1959

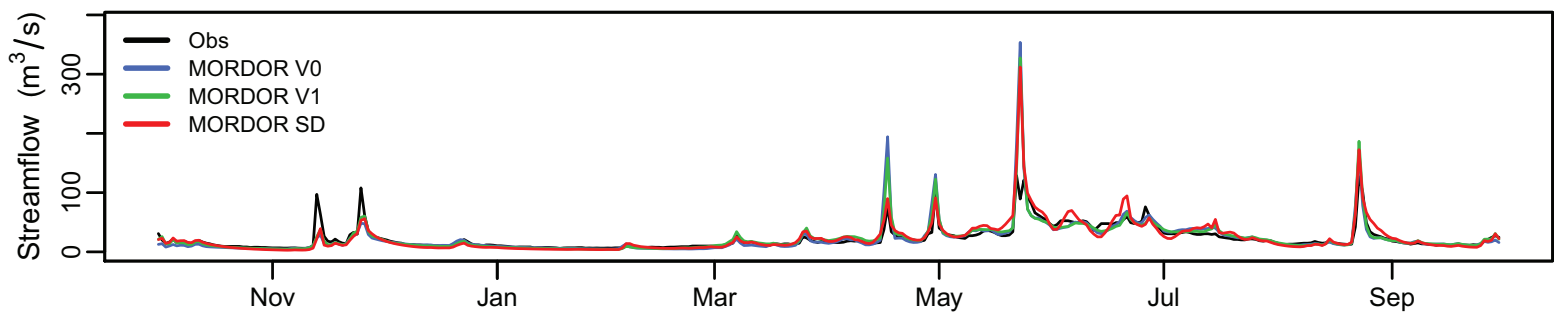

Year 1960

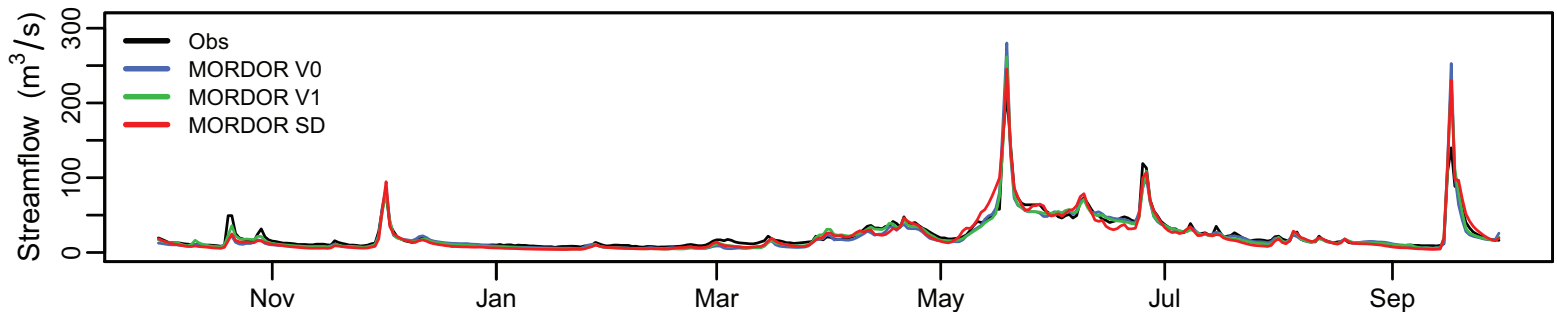

# Stura@Lanzo

Year 1961

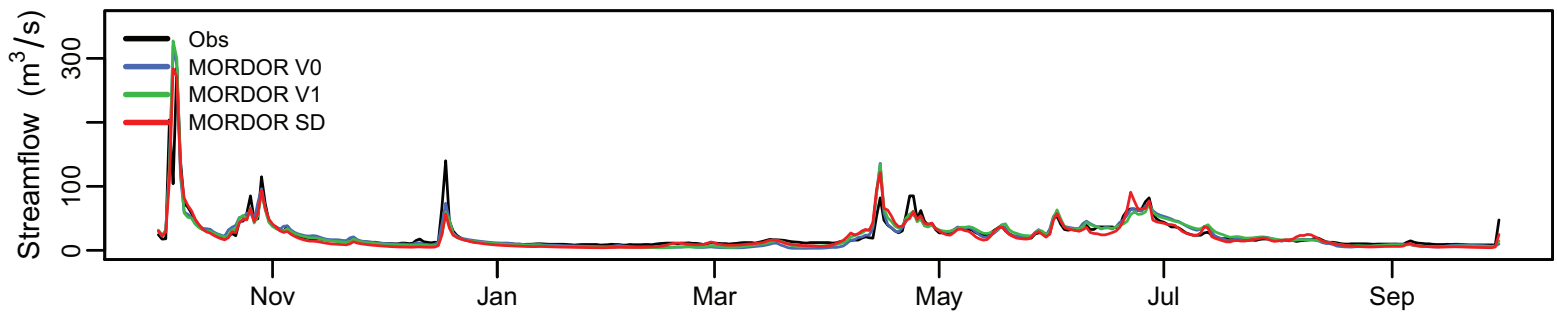

Year 1962

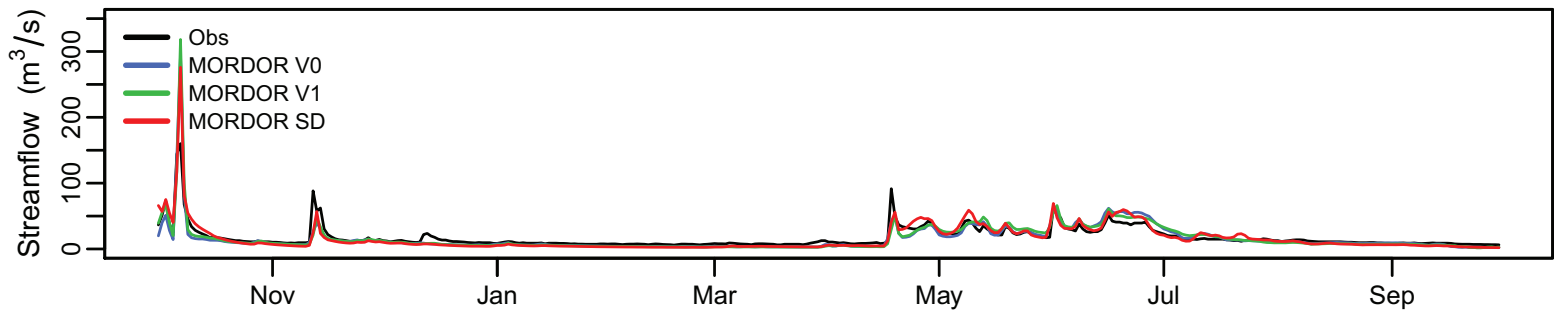

Year 1963

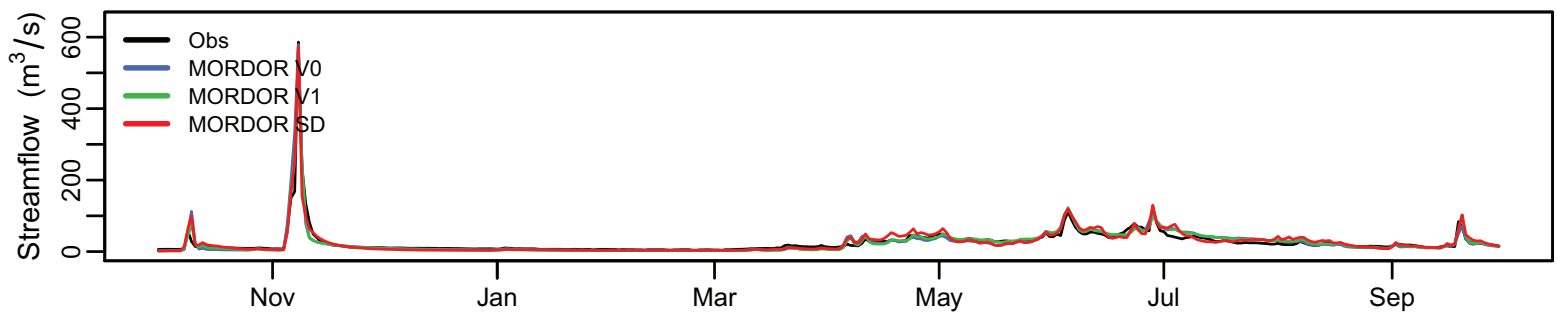

Year 1964

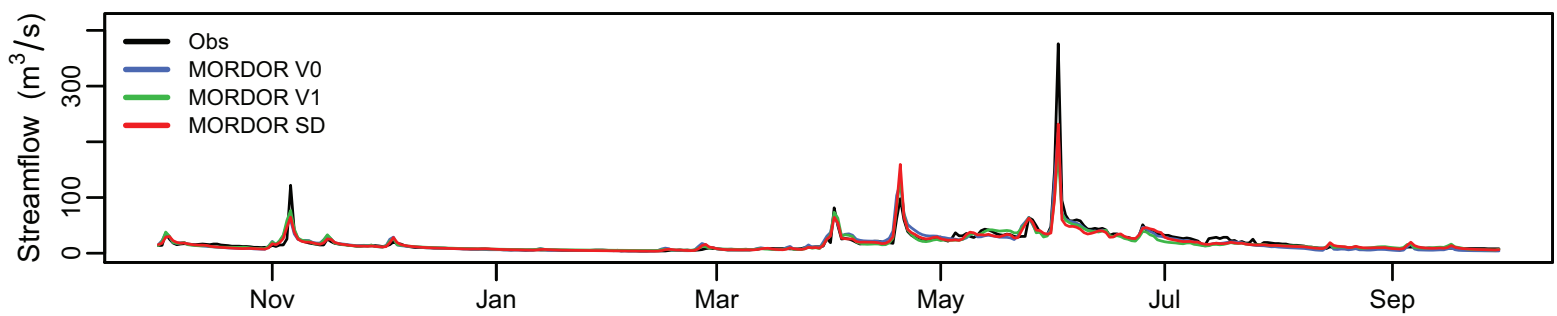

Year 1965

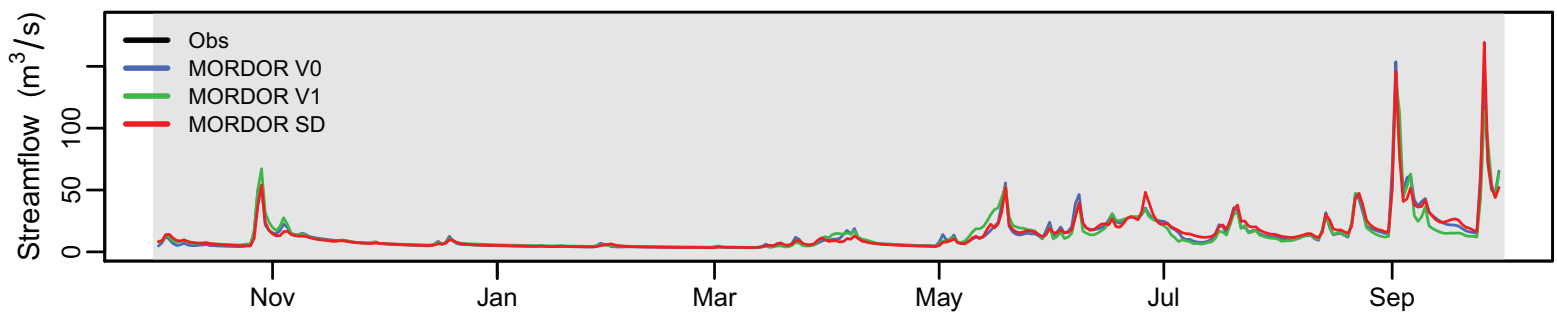

Year 1966

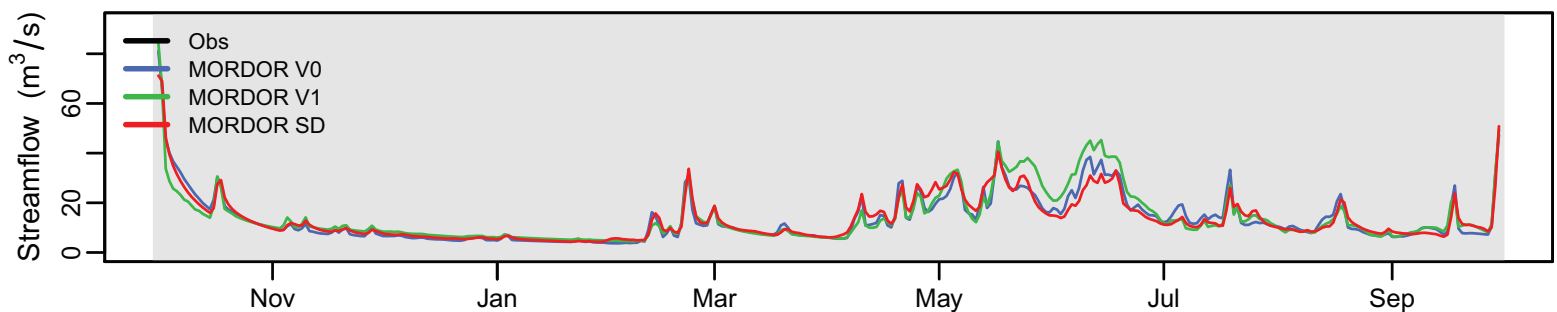

# Stura@Lanzo

Year 1967

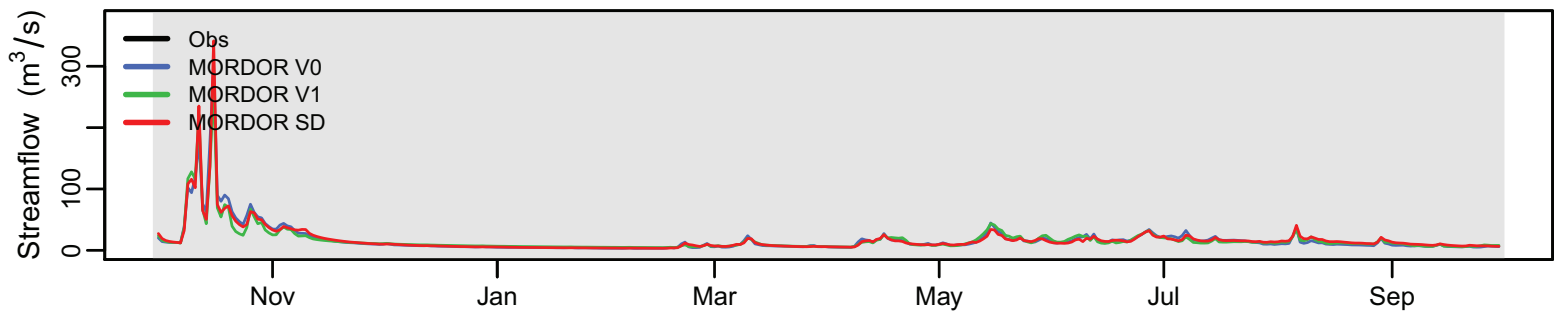

Year 1968

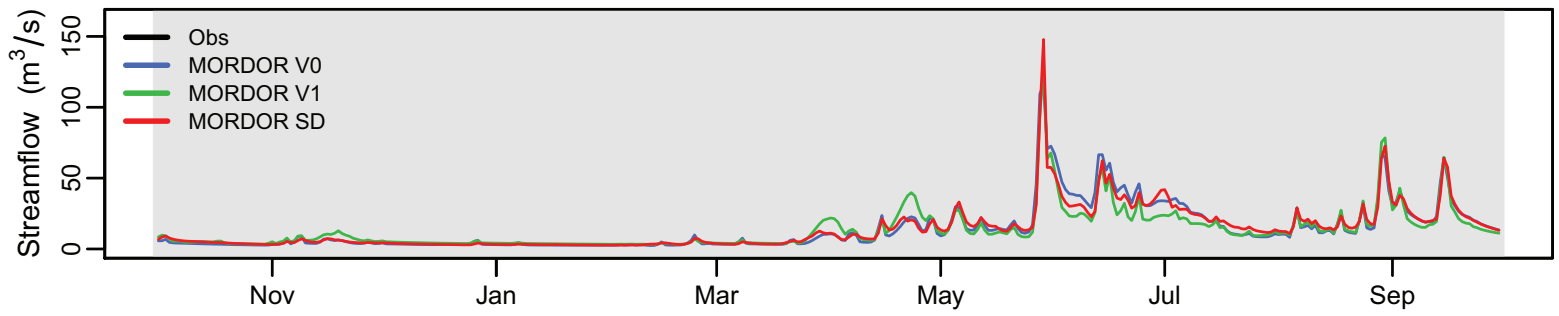

Year 1969

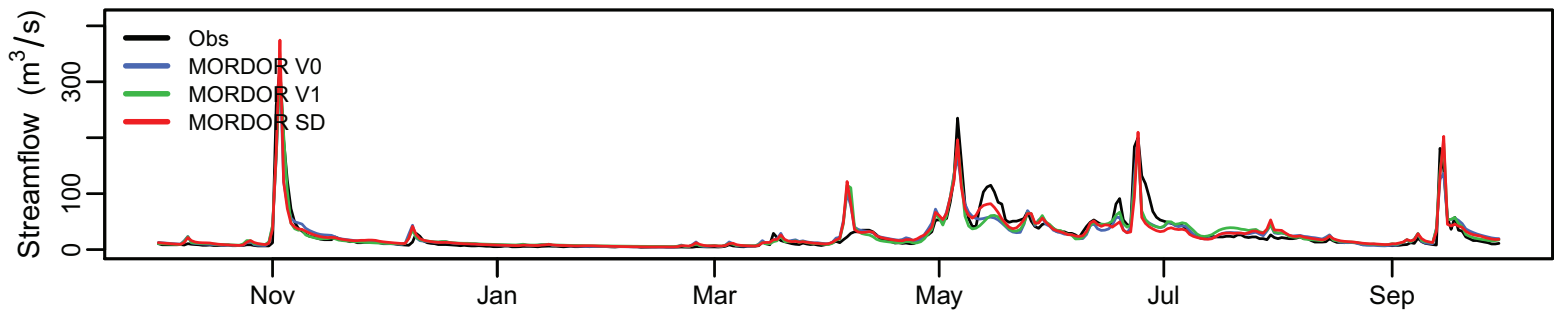

Year 1970

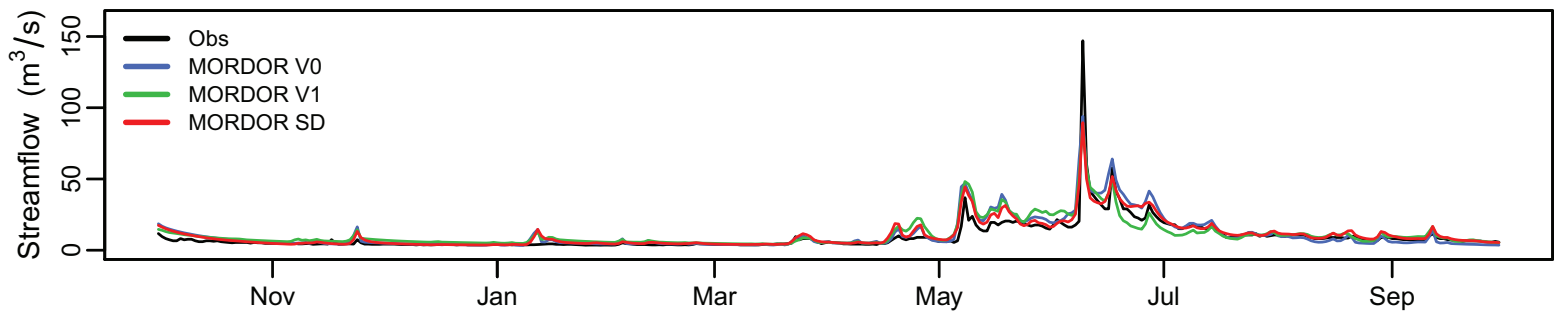

Year 1971

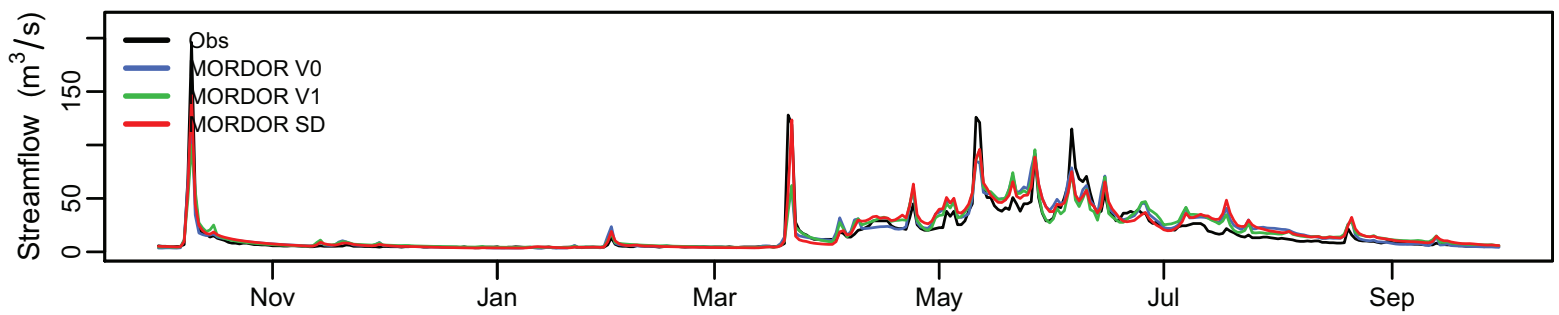

Year 1972

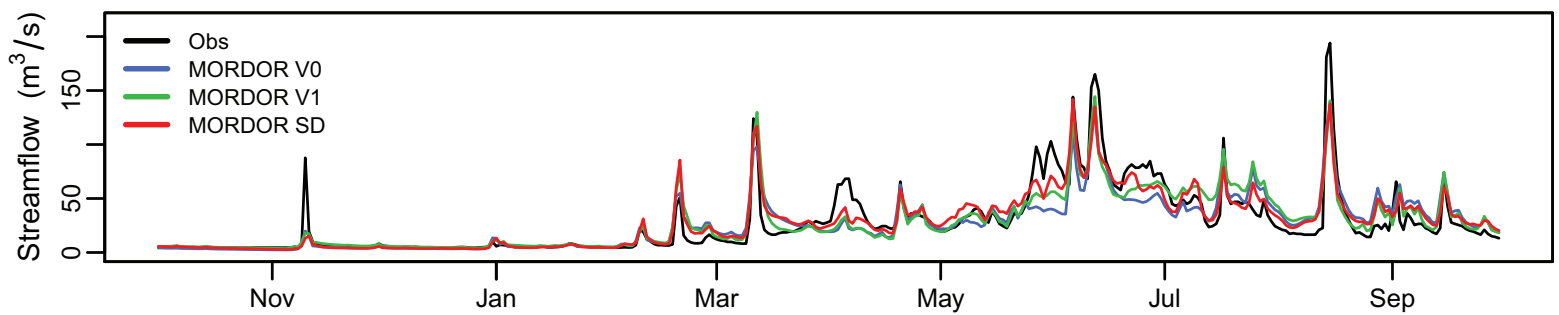

# Tarn@Cocures

Year 1986

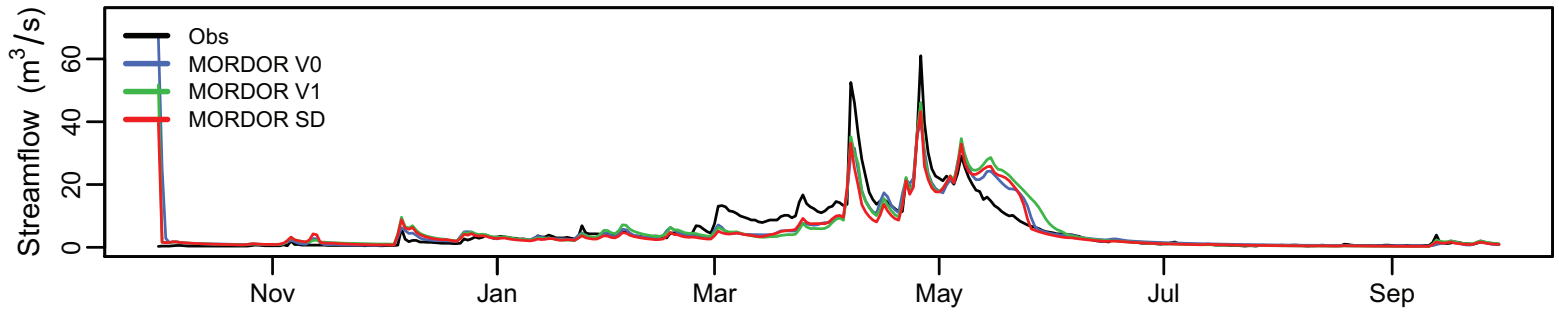

Year 1987

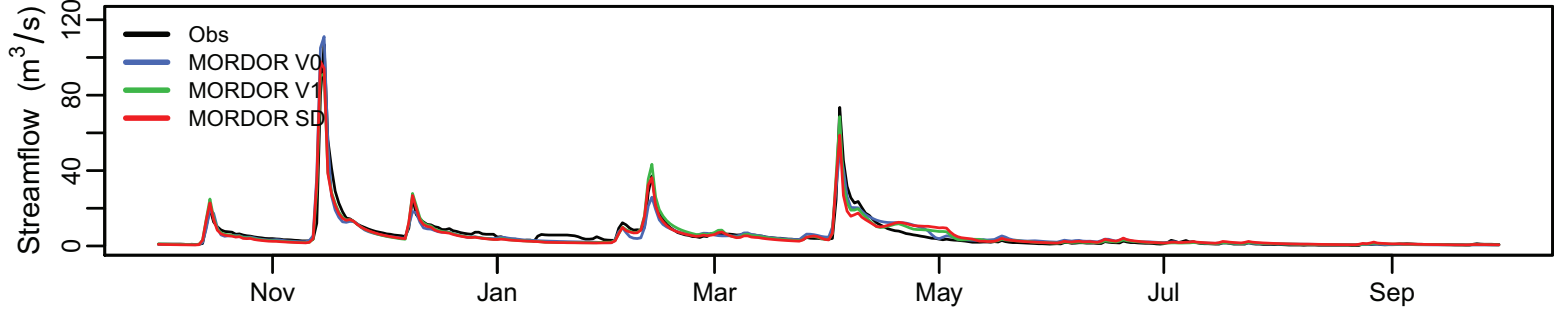

Year 1988

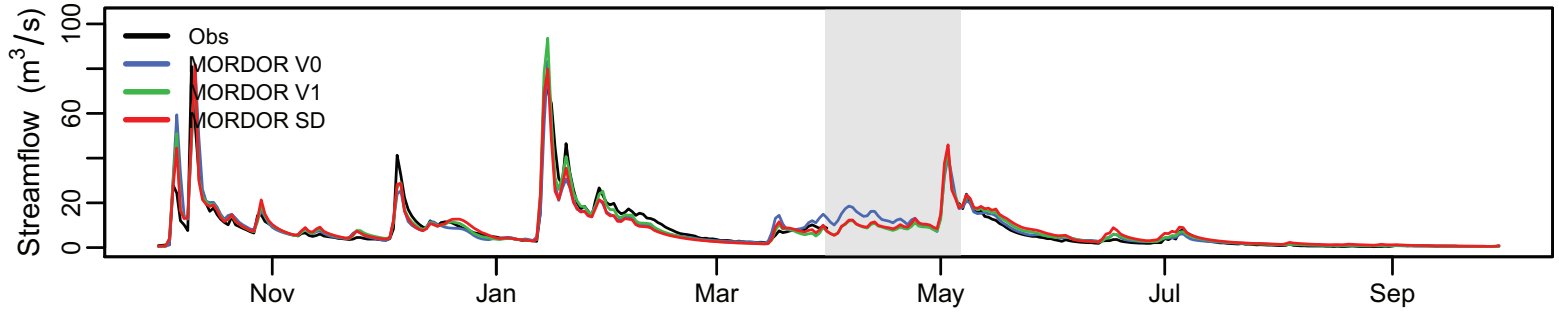

Year 1989

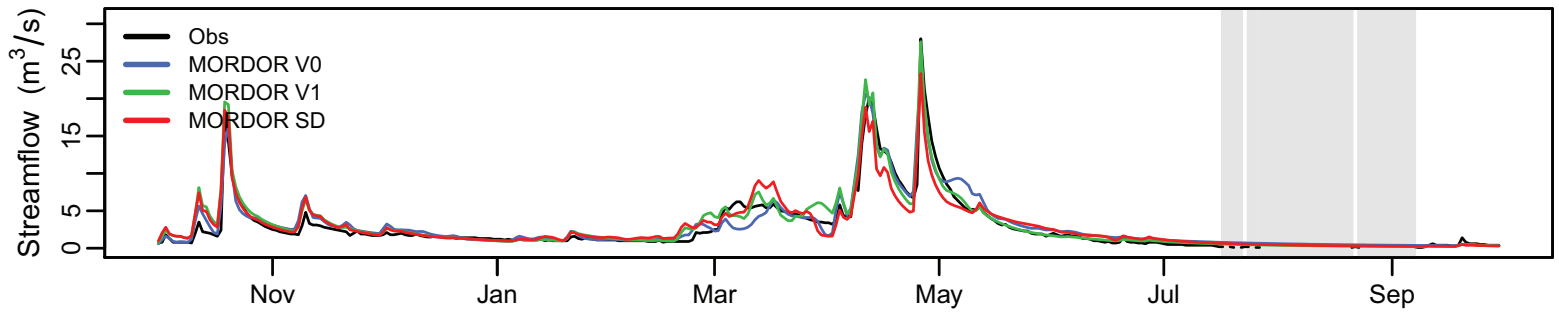

Year 1990

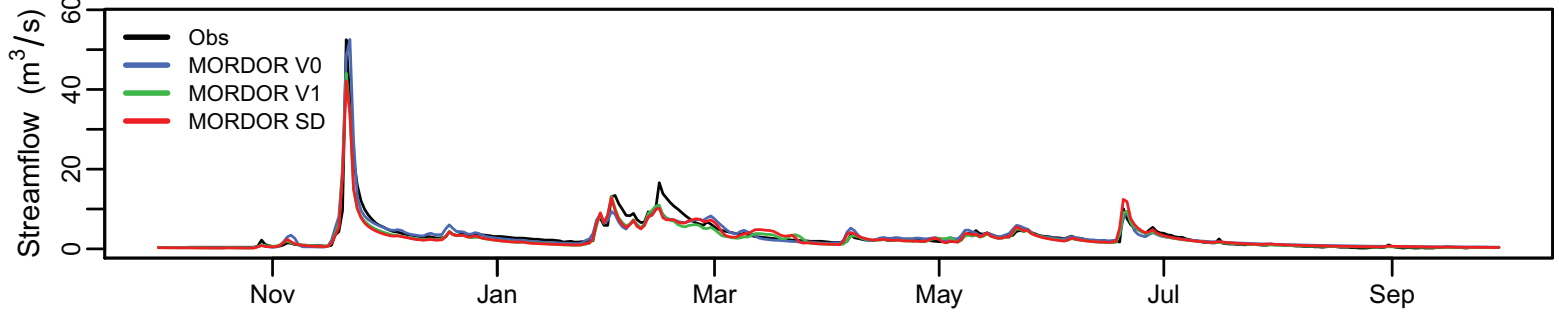

Year 1991

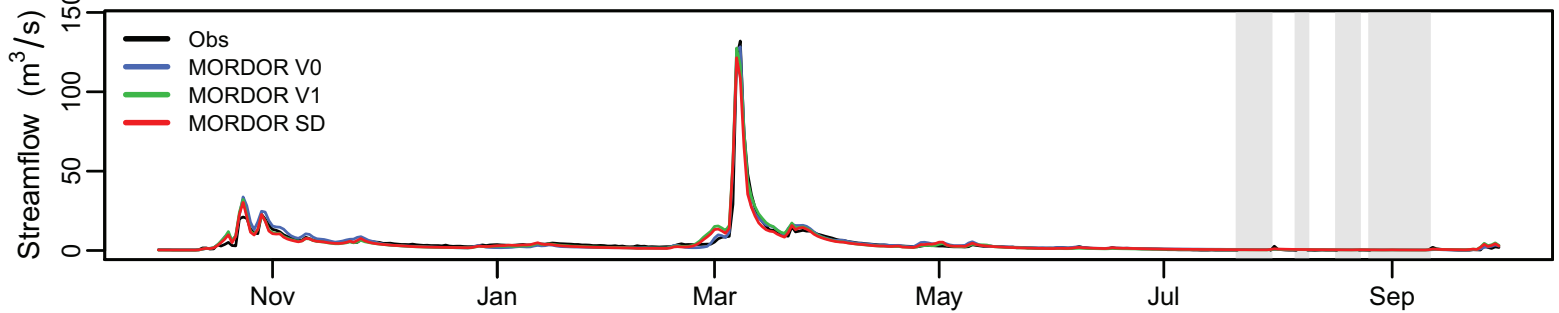



# Tarn@Cocures

Year 1992

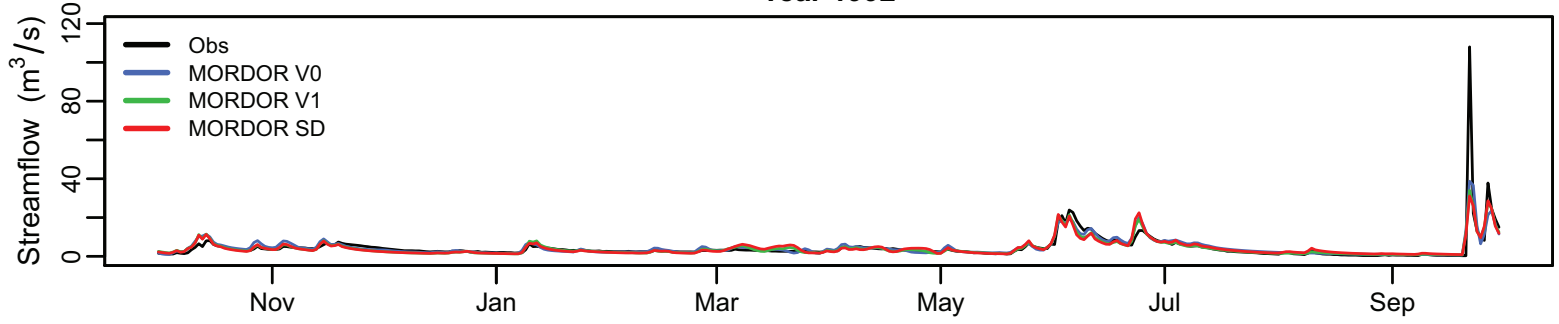

Year 1993

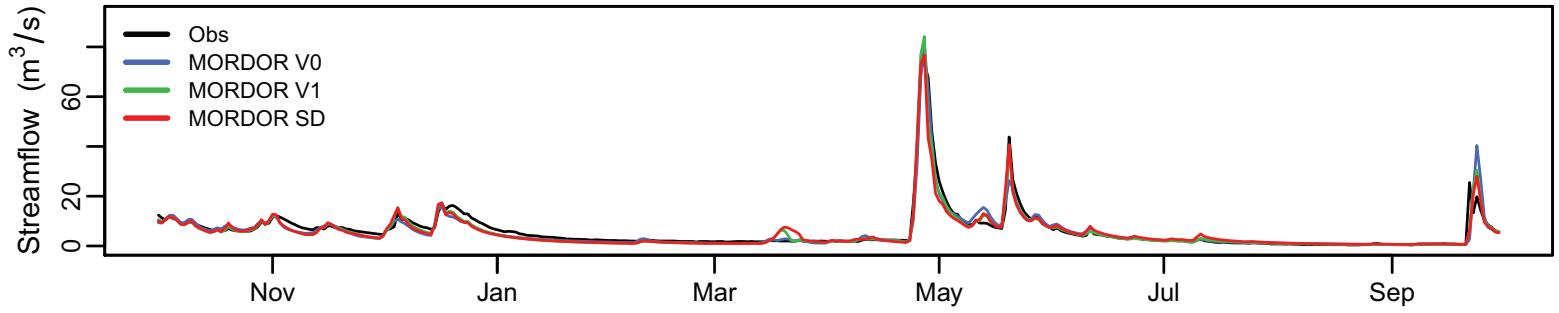

Year 1994

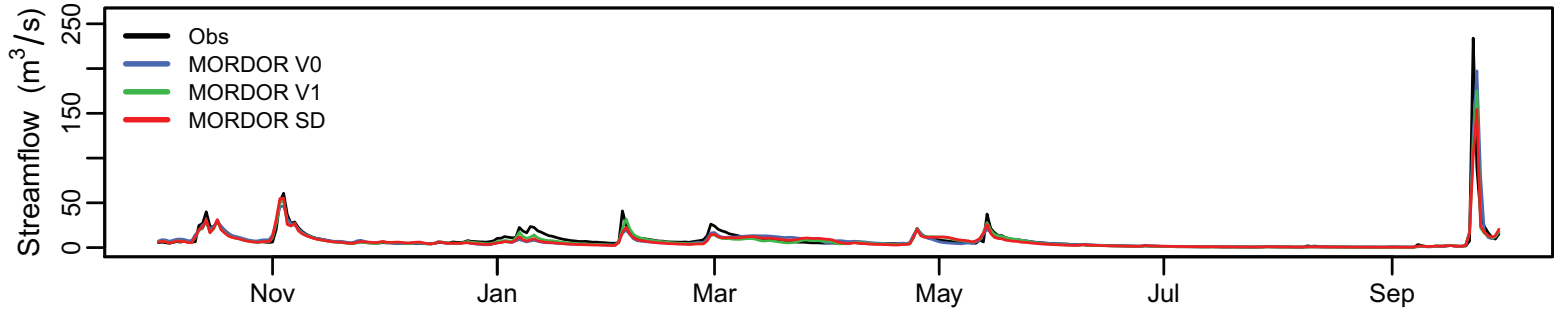

Year 1995

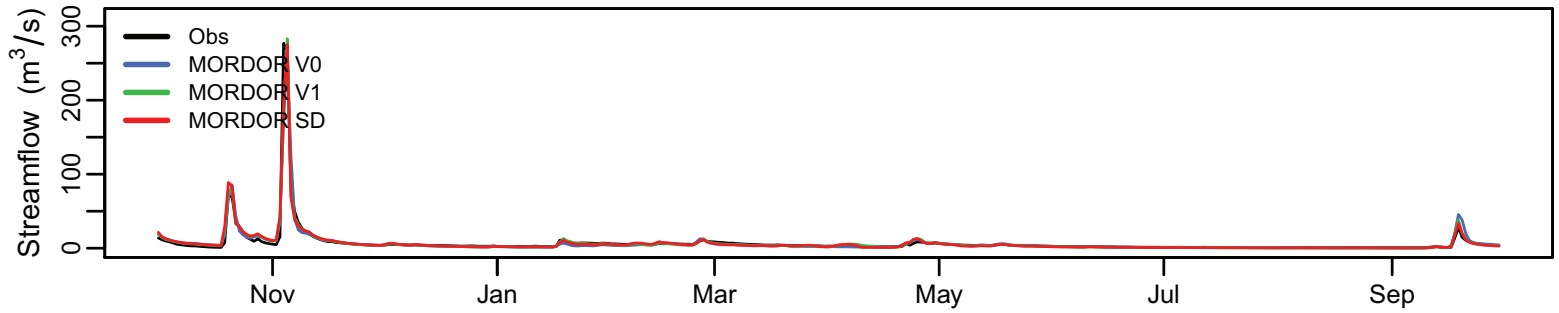

Year 1996

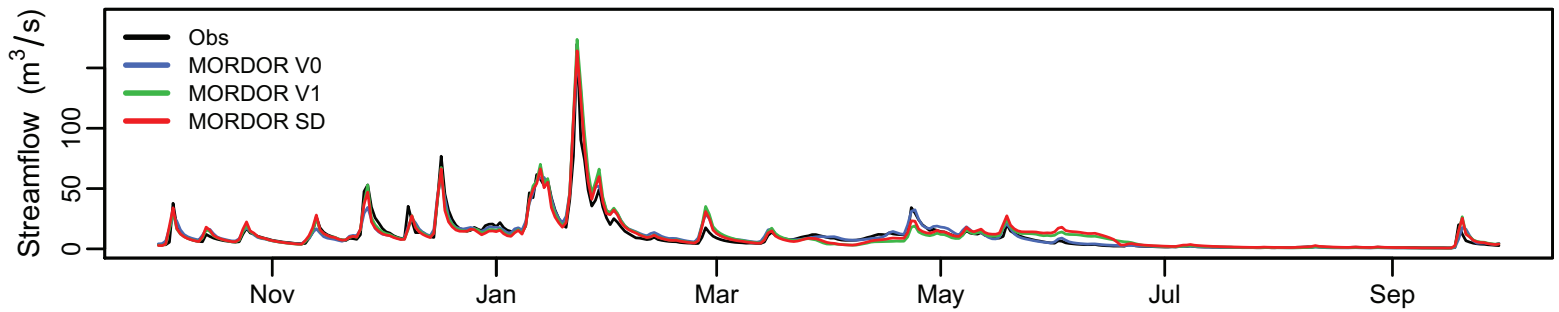

Year 1997

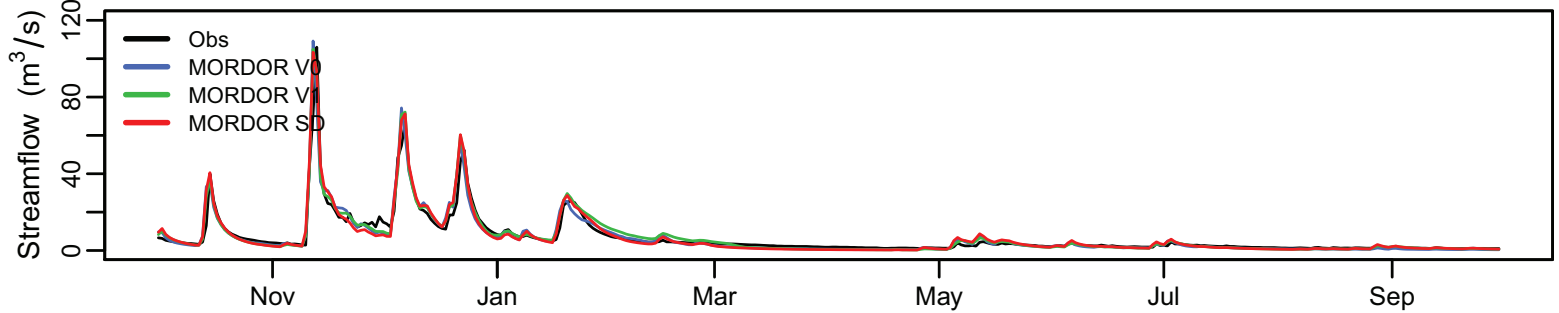

# Tarn@Cocures

Year 1998

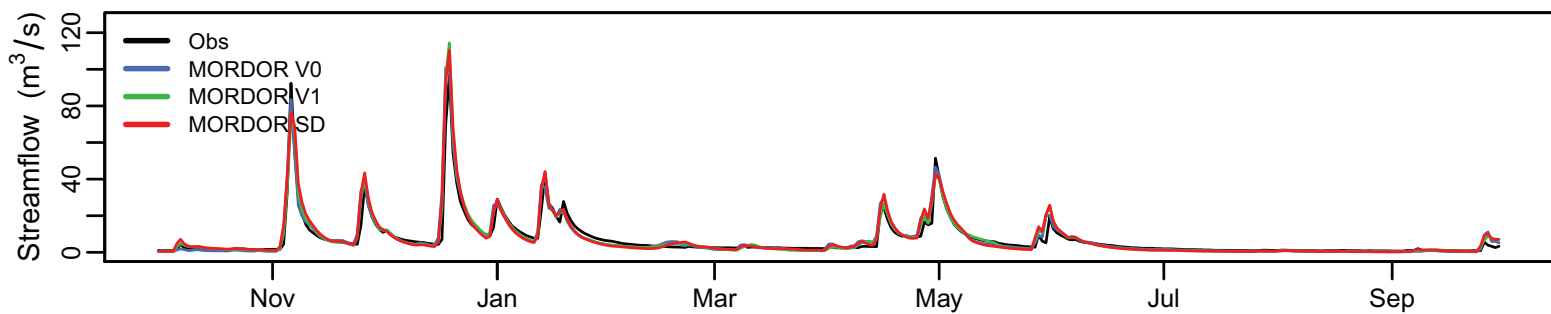

Year 1999

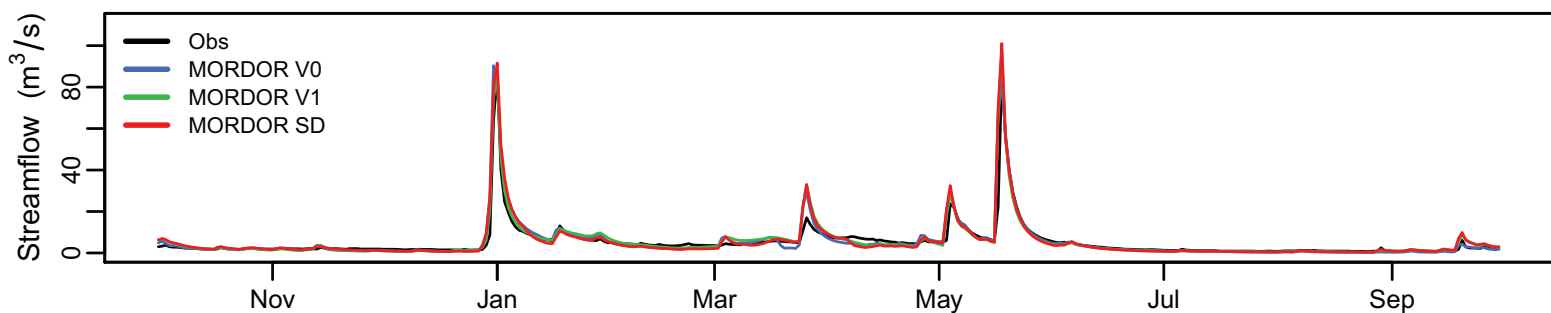

Year 2000

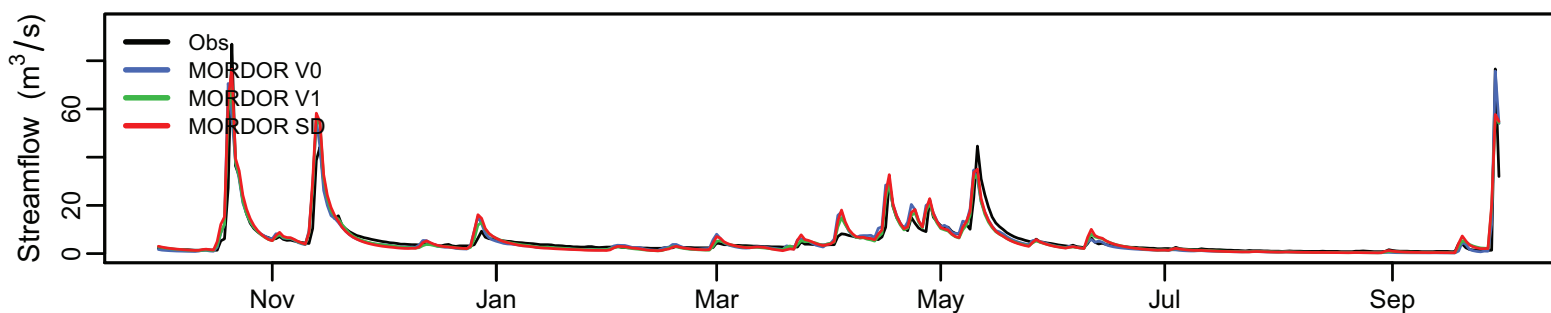

Year 2001

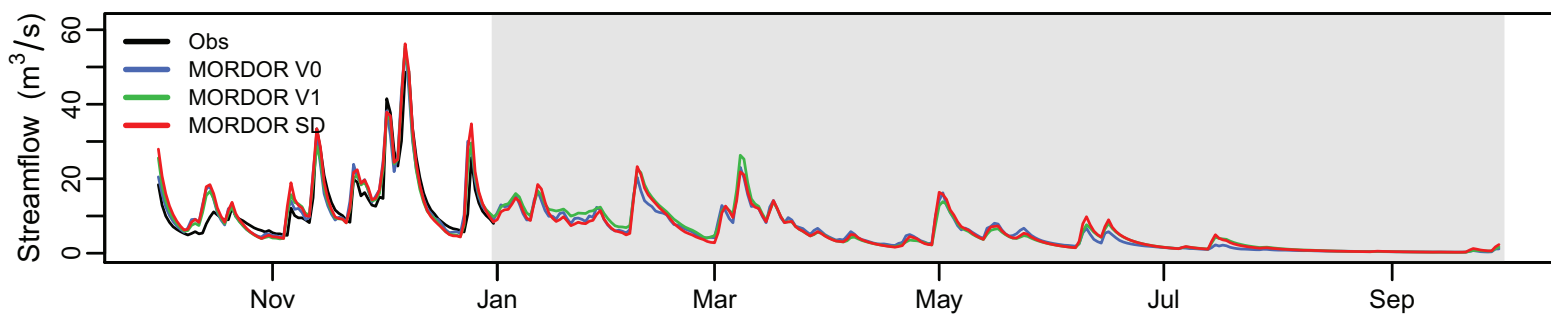

Year 2002

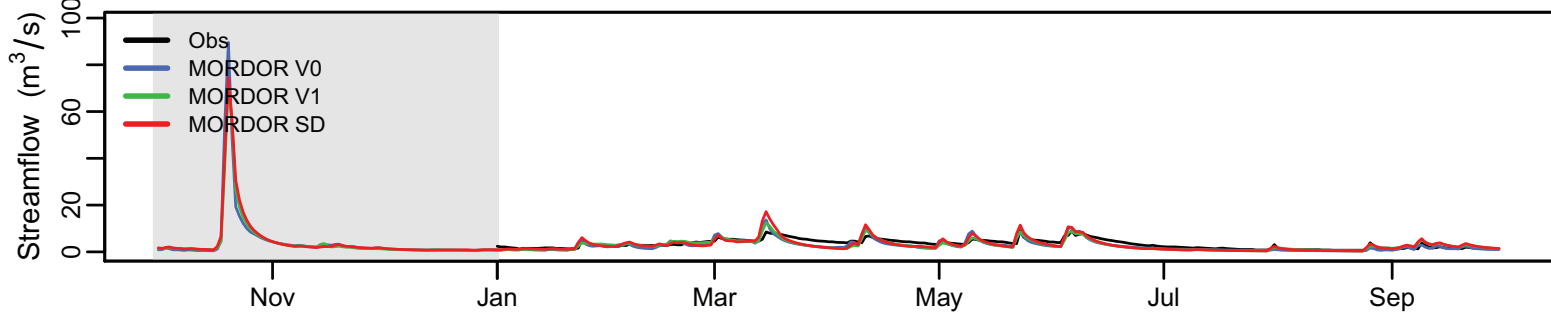

Year 2003

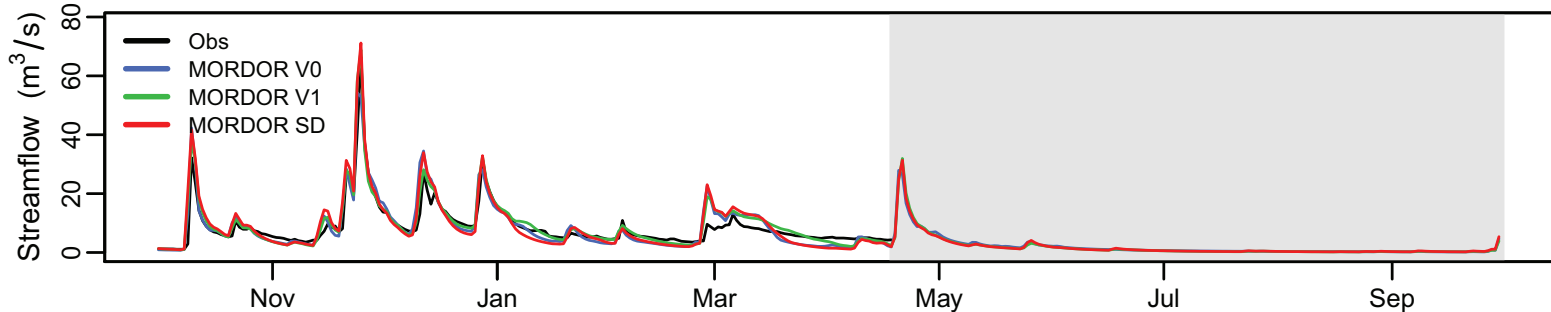

# Tarn@Cocures

Year 2004

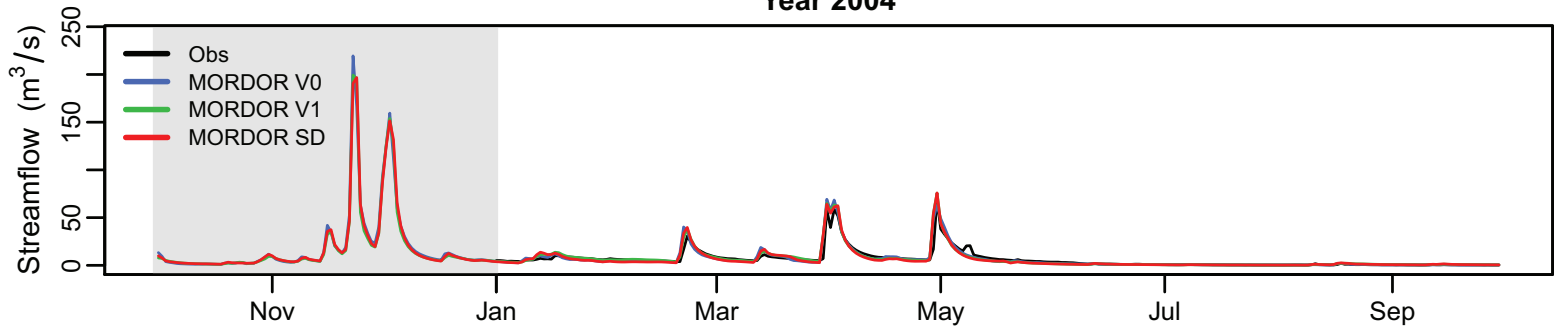

Year 2005

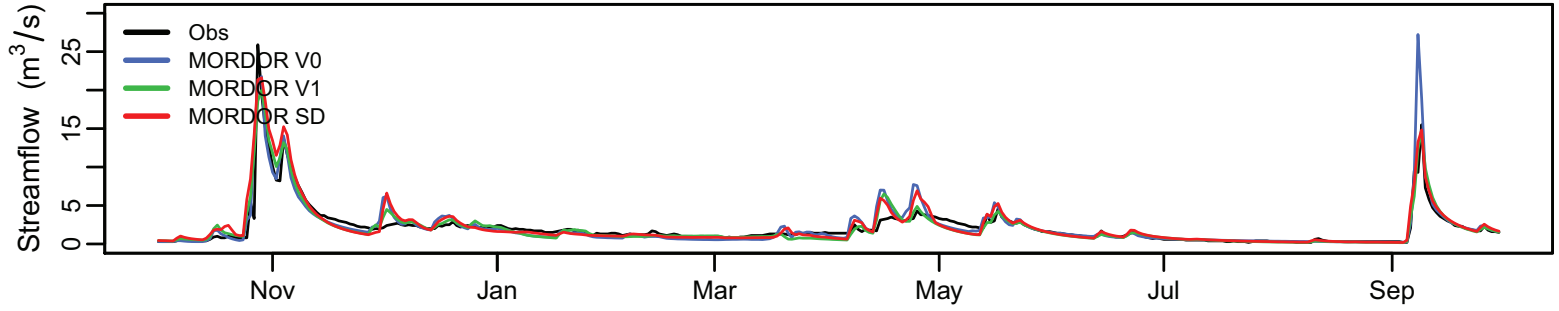

Year 2006

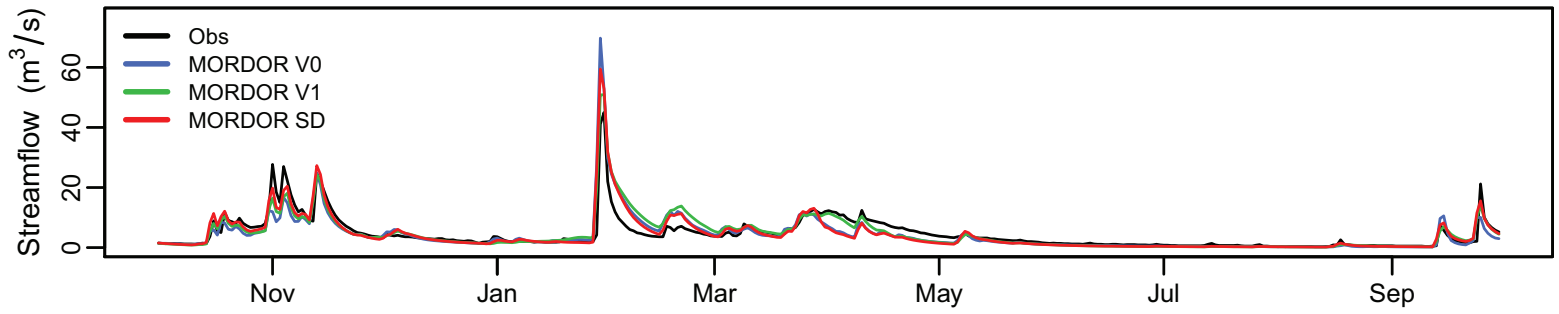

# Tarn@Millau

Year 1981

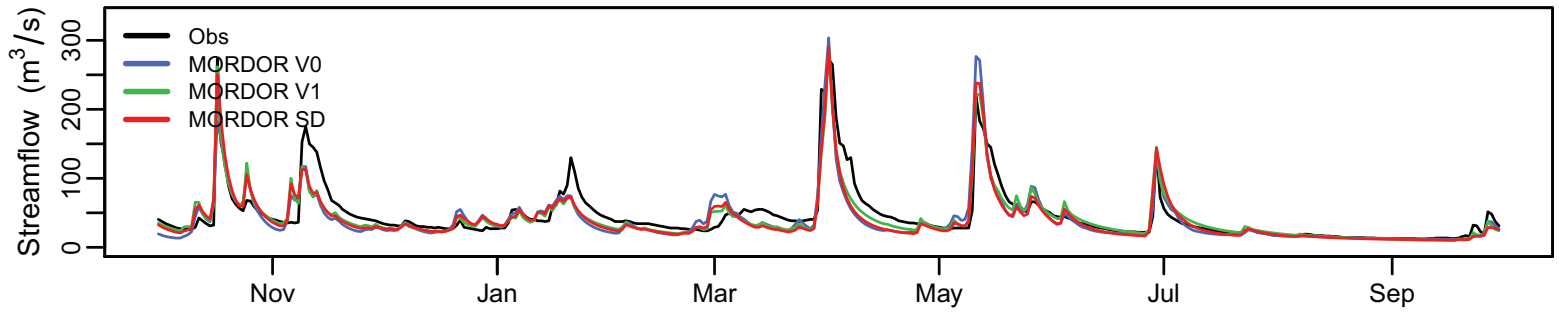

Year 1982

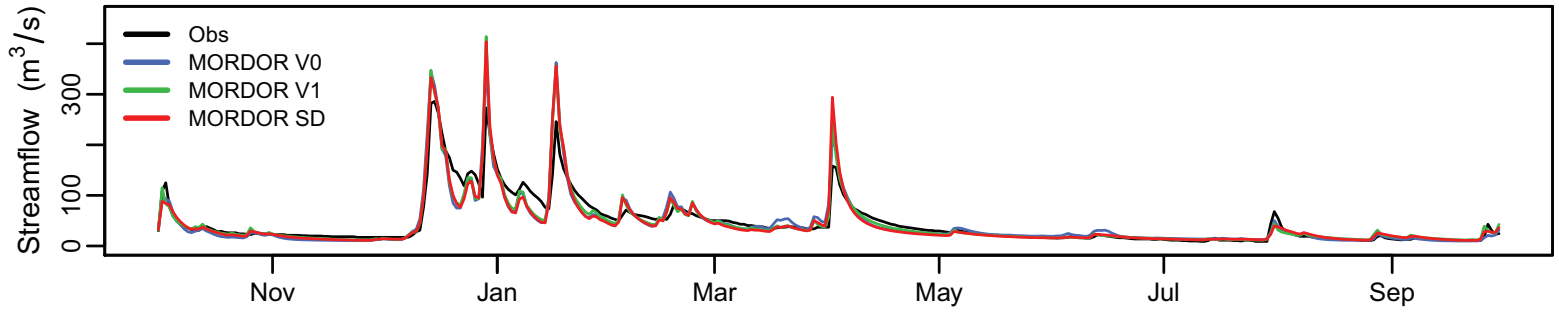

Year 1983

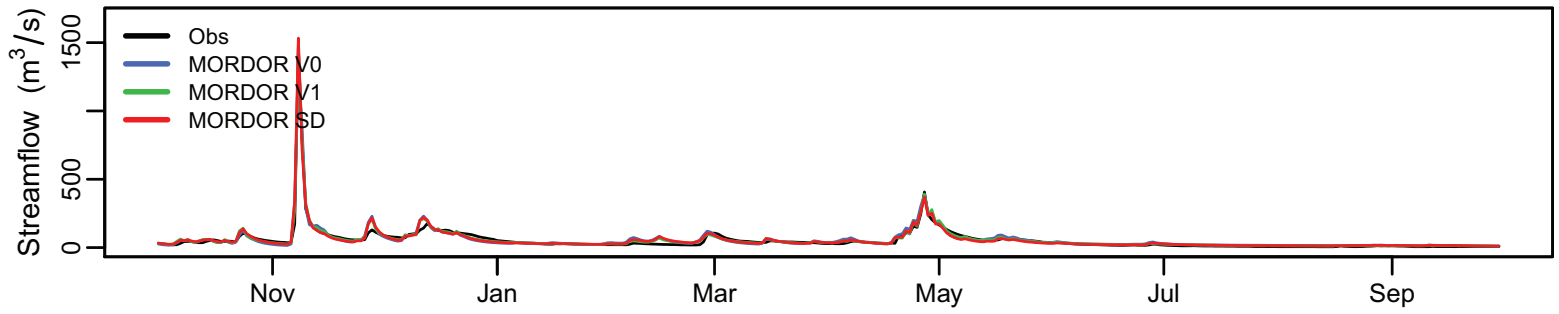

Year 1984

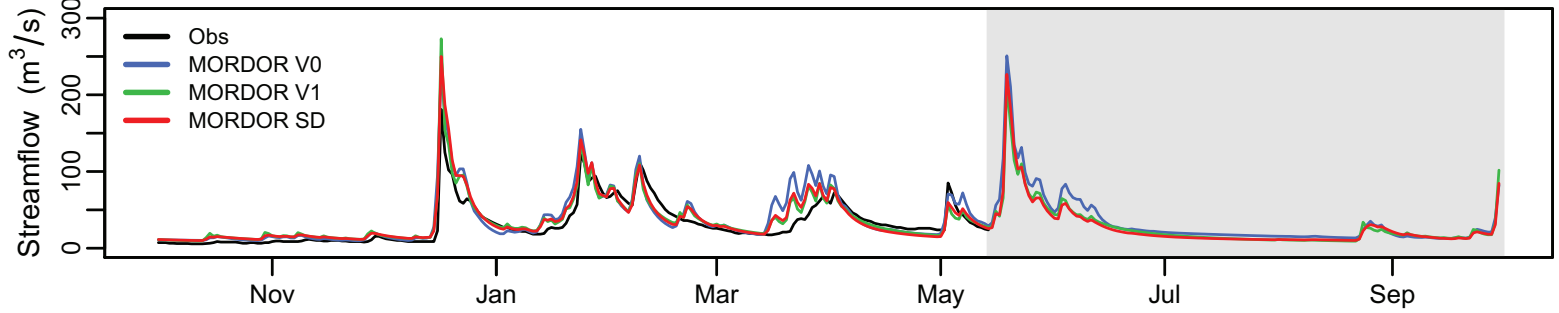

Year 1985

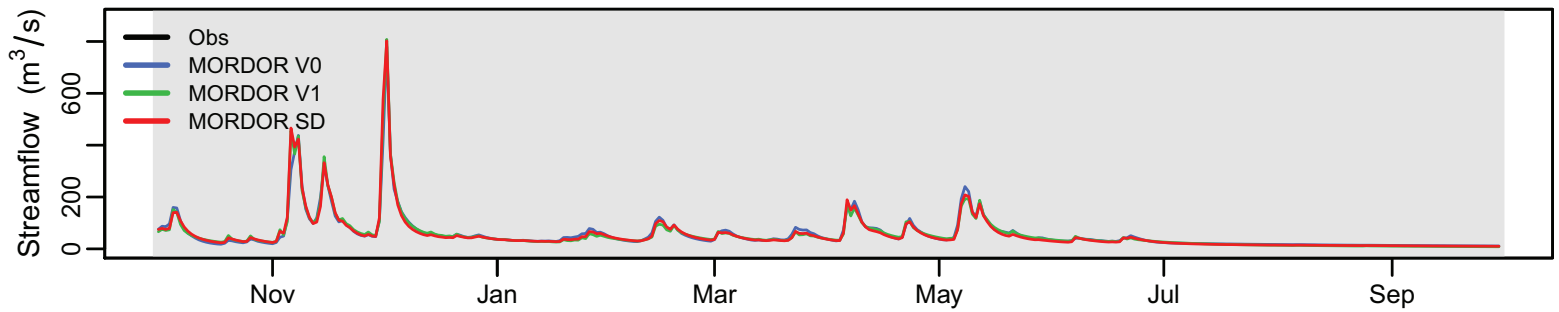

Year 1986

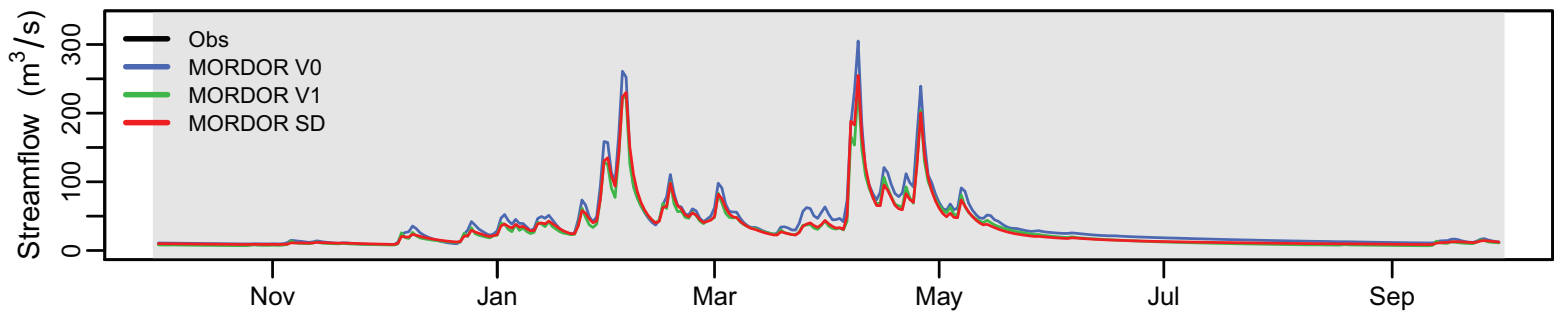

# Tarn@Millau

Year 1987

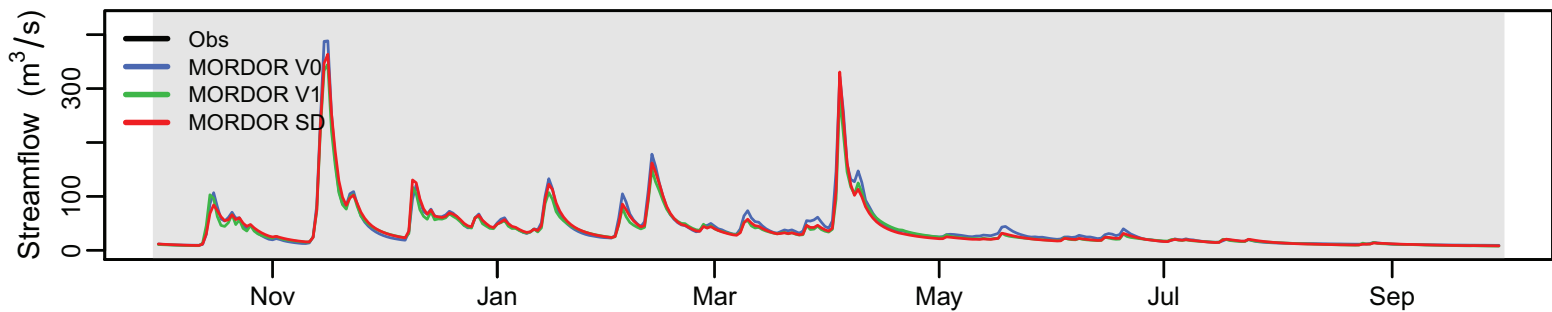

Year 1988

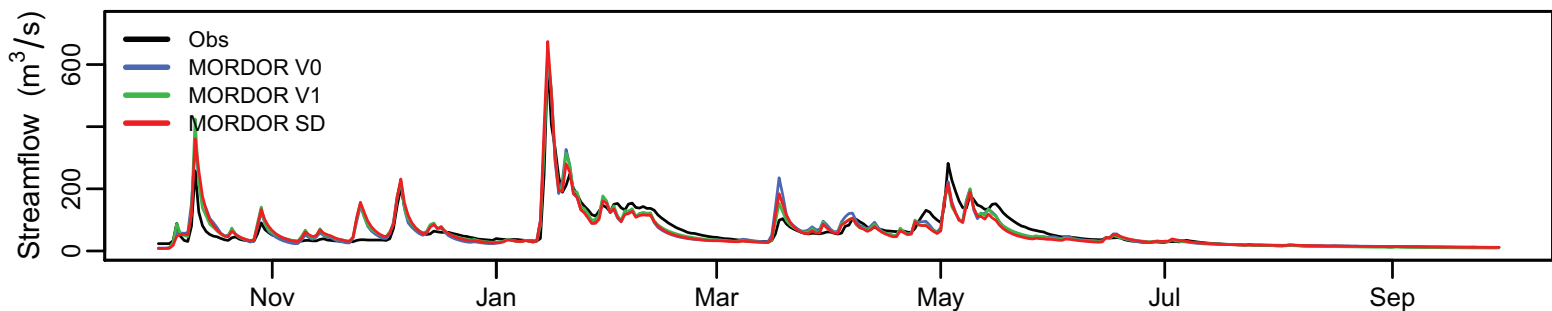

Year 1989

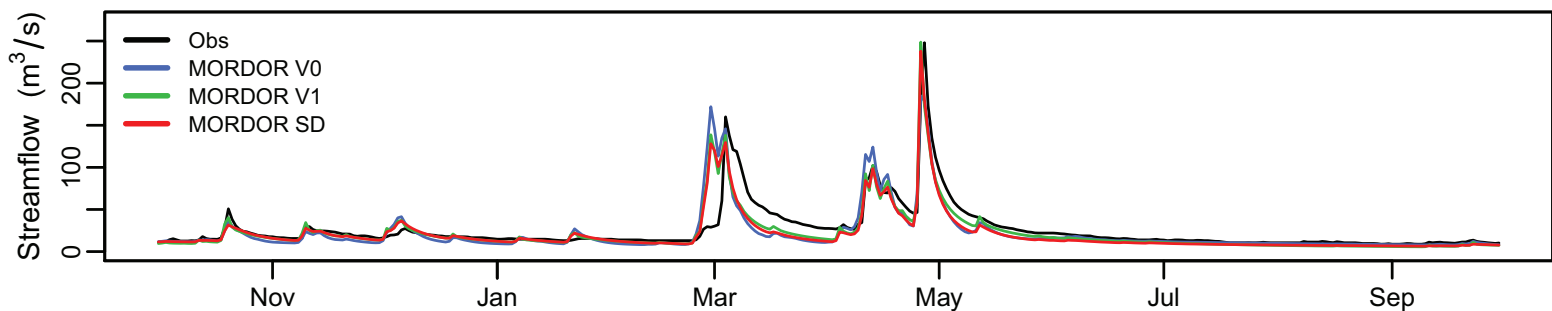

Year 1990

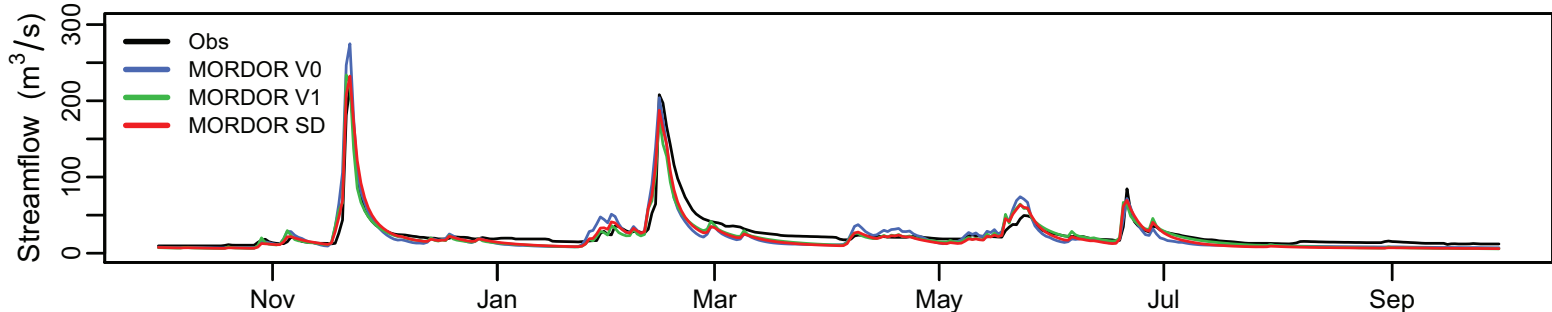

Year 1991

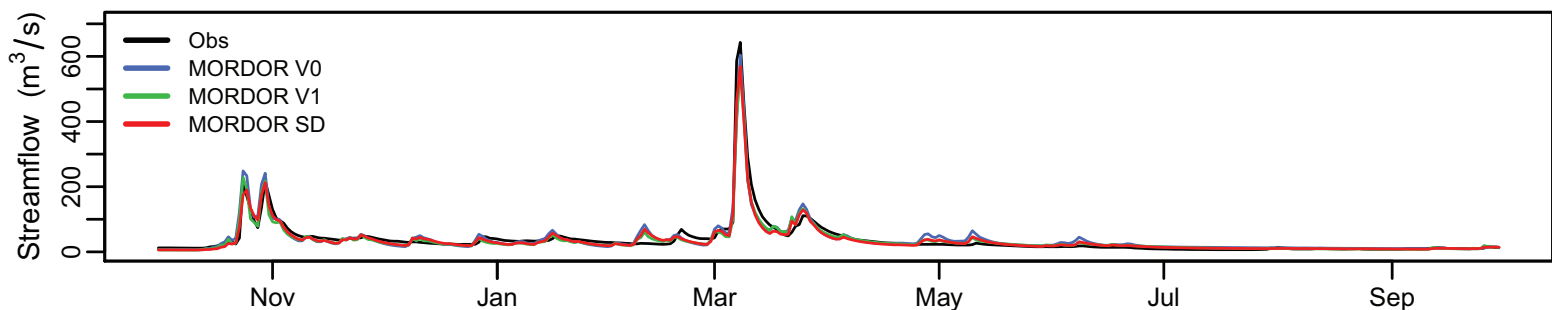

Year 1992

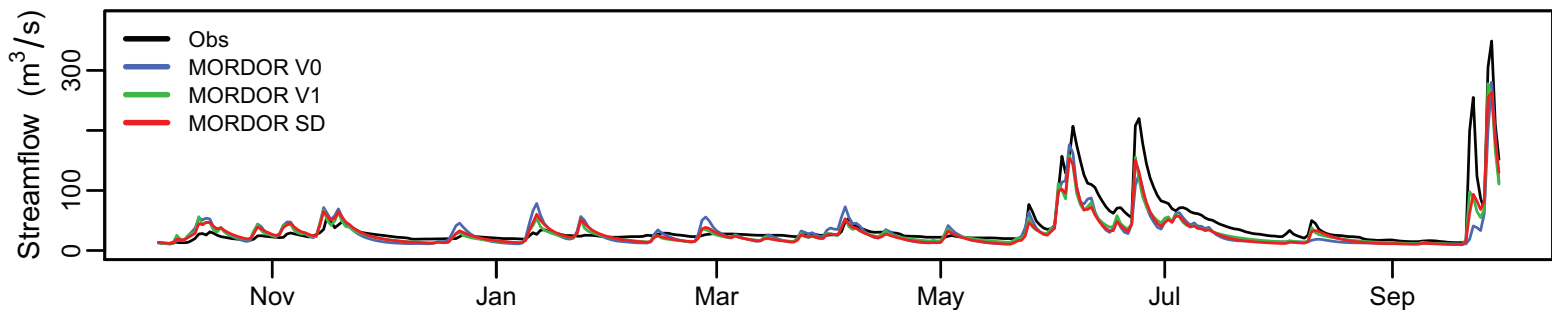

# Tarn@Millau

Year 1993

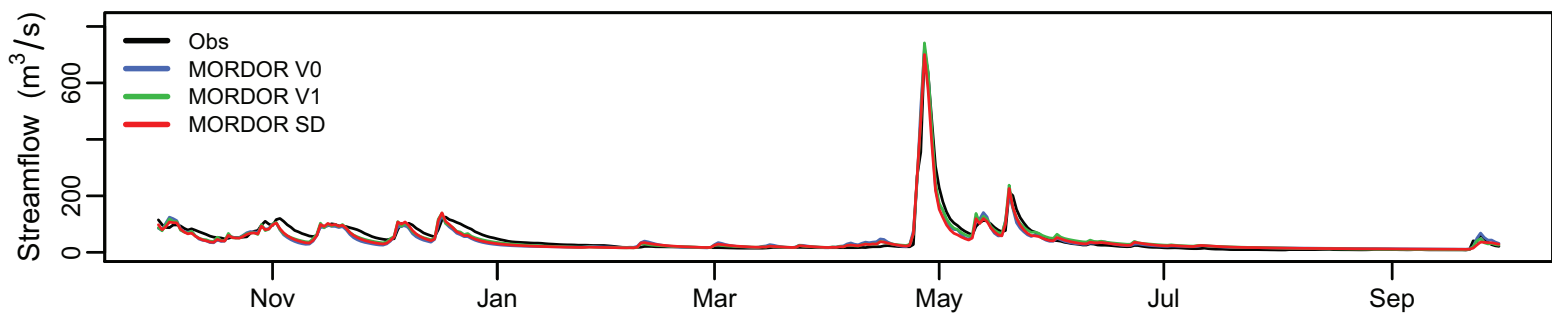

Year 1994

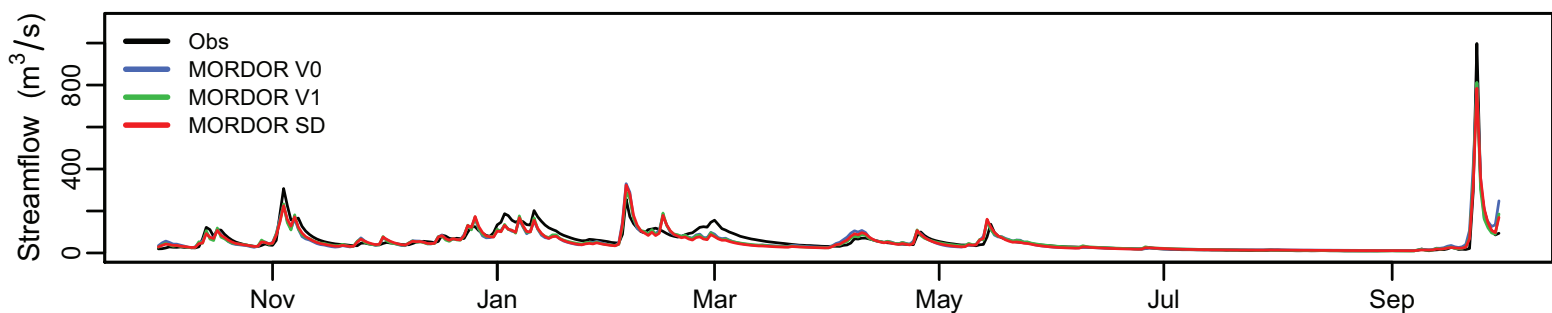

Year 1995

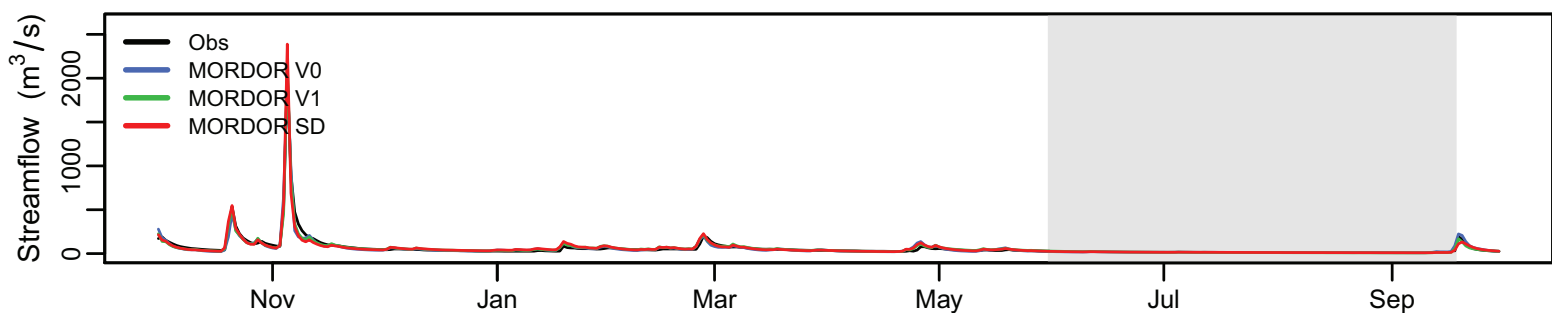

Year 1996

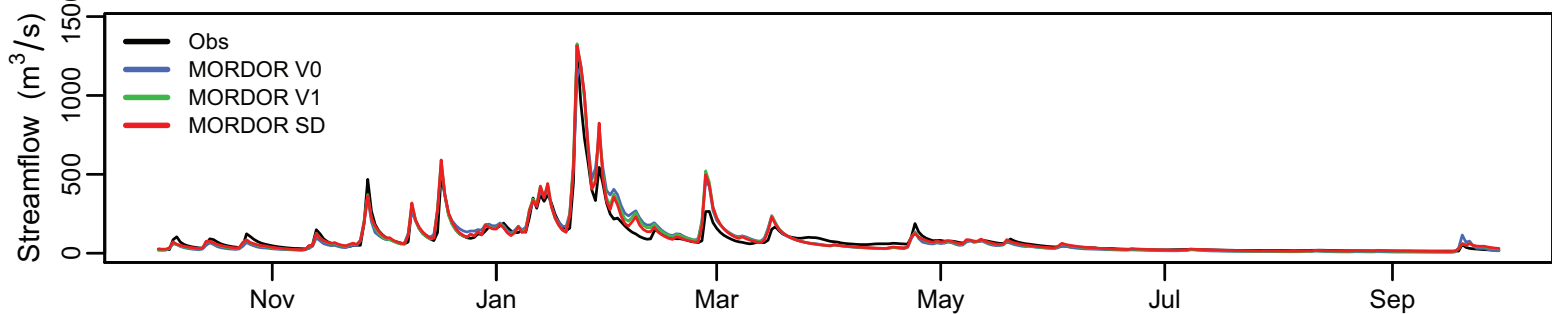

Year 1997

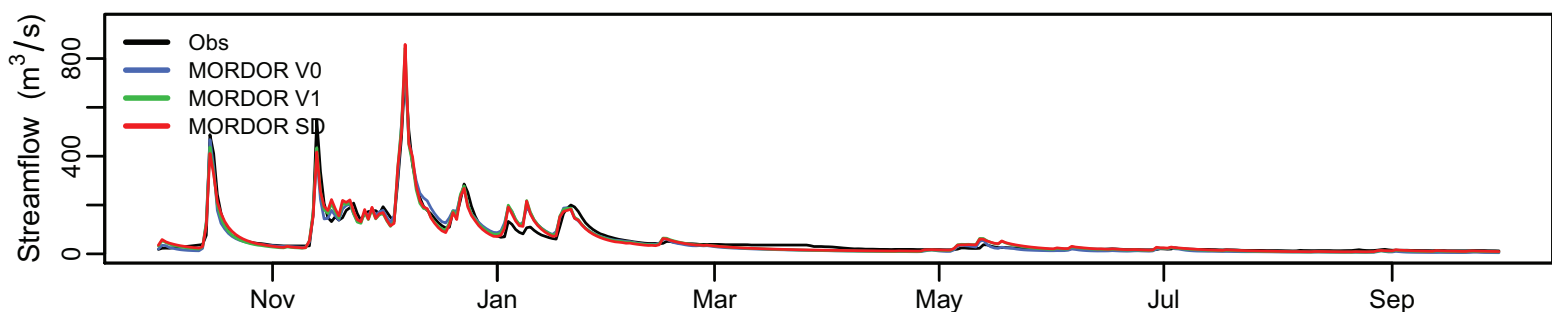

Year 1998

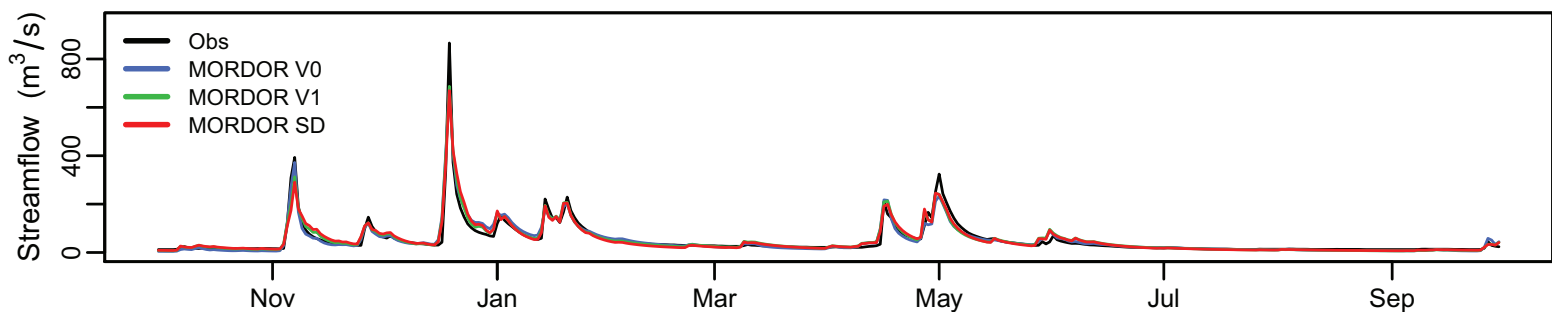

# Tarn@Millau

Year 1999

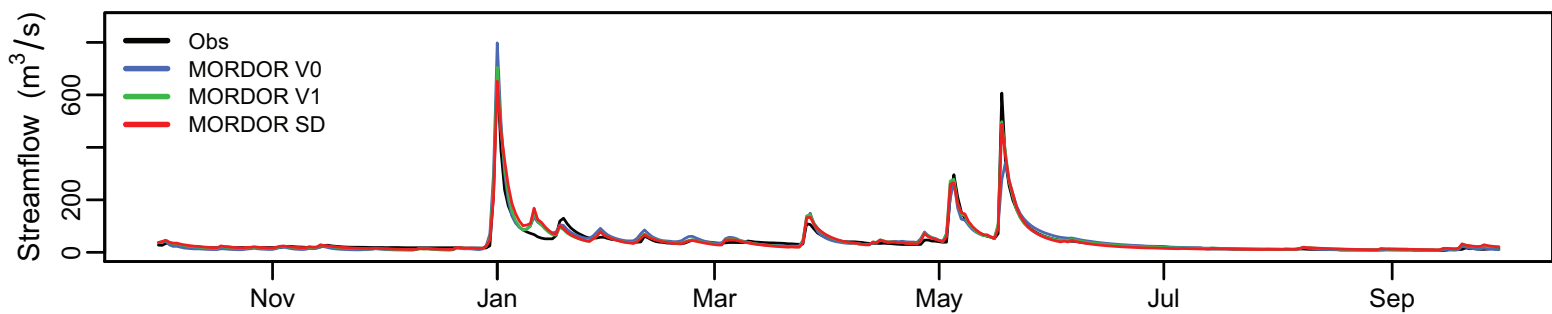

Year 2000

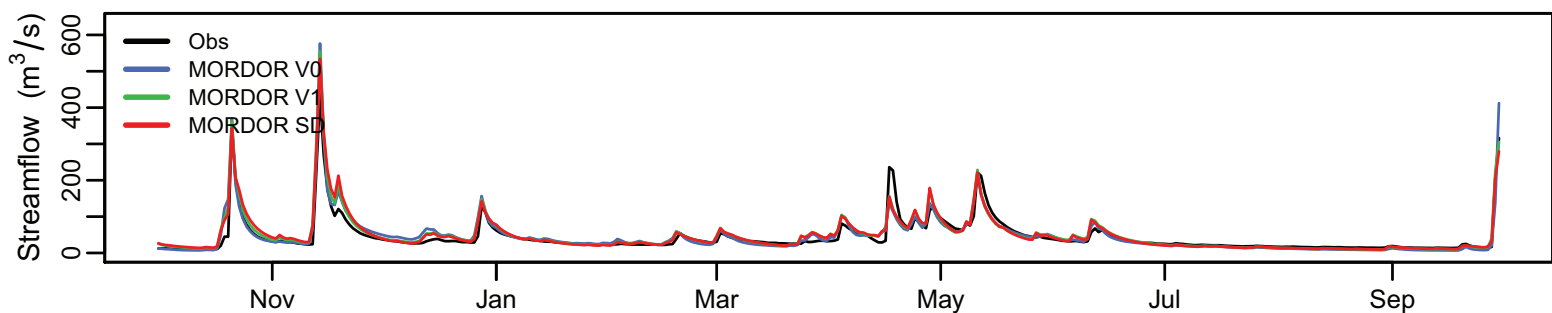

Year 2001

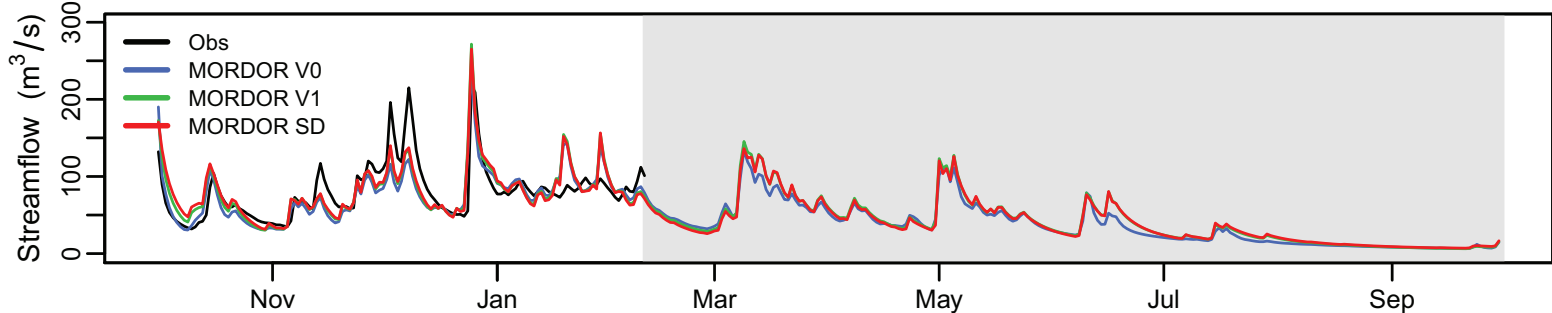

Year 2002

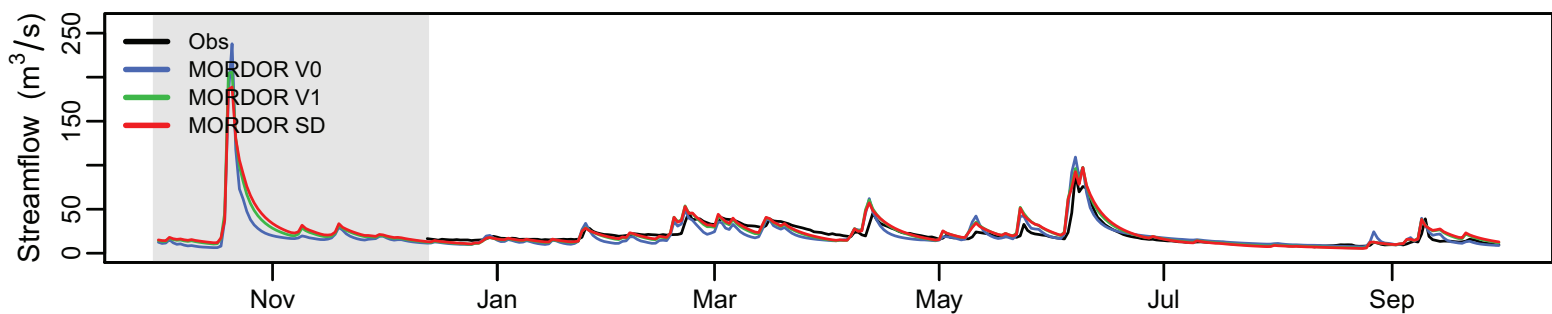

Year 2003

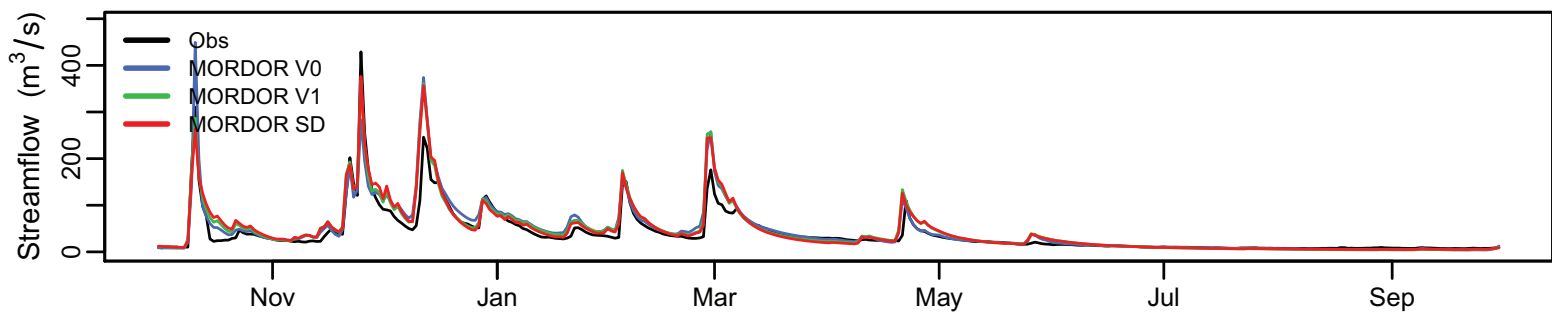

Year 2004

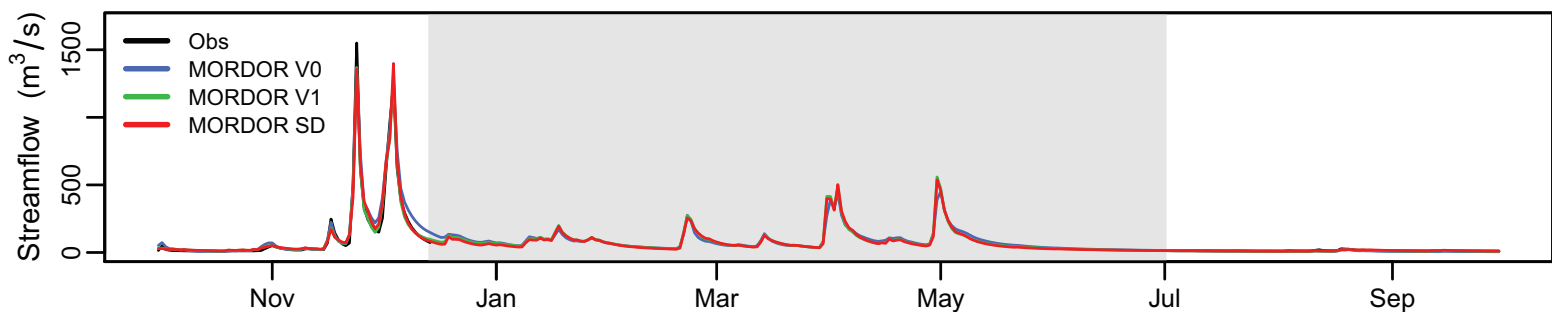

# Tarn@Millau

Year 2005

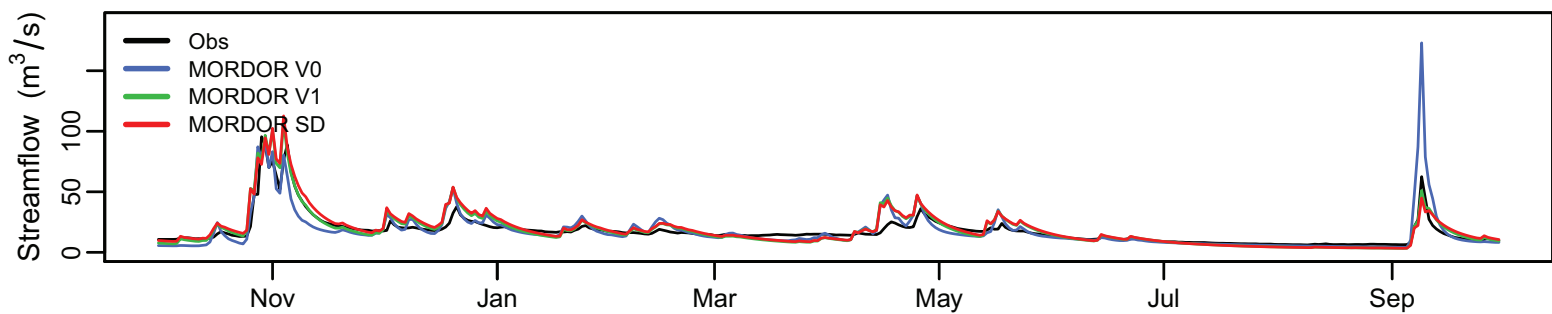

Year 2006

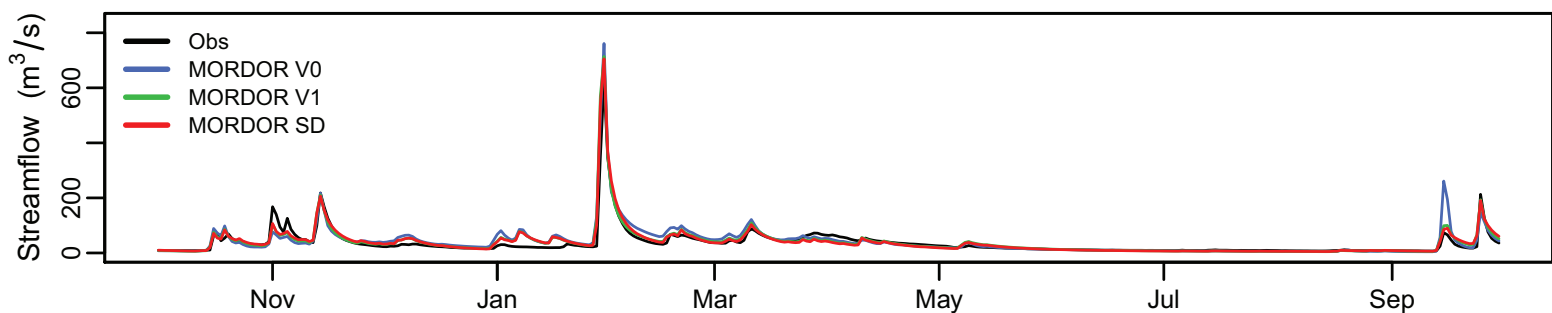

Year 2007

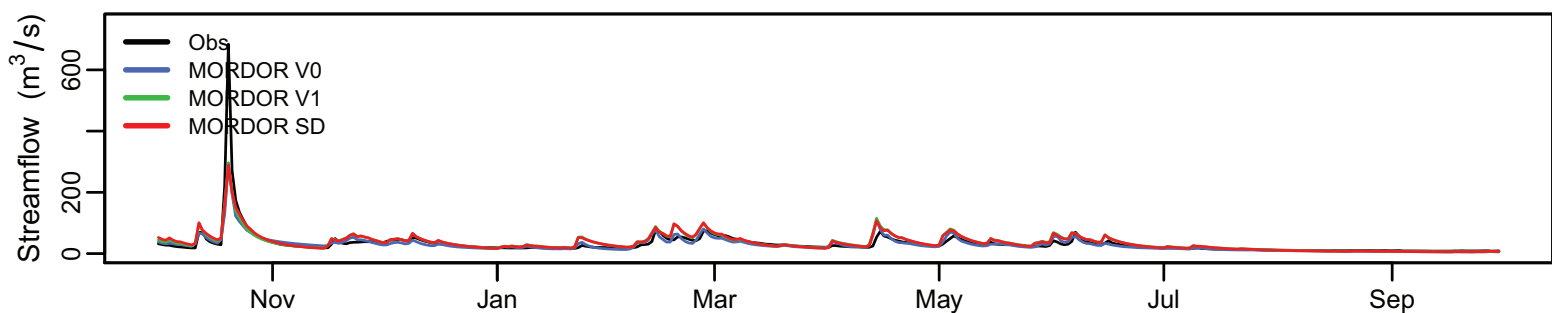

Year 2008

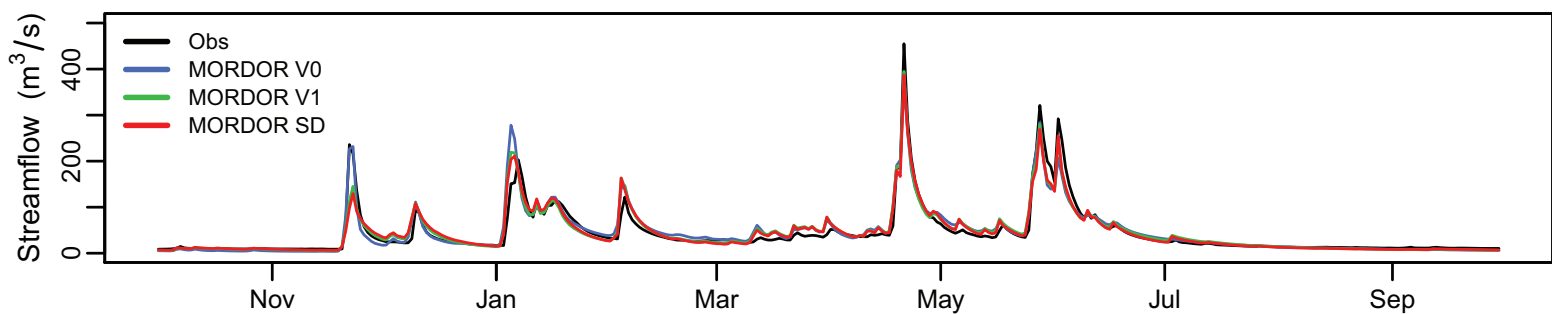

Year 2009

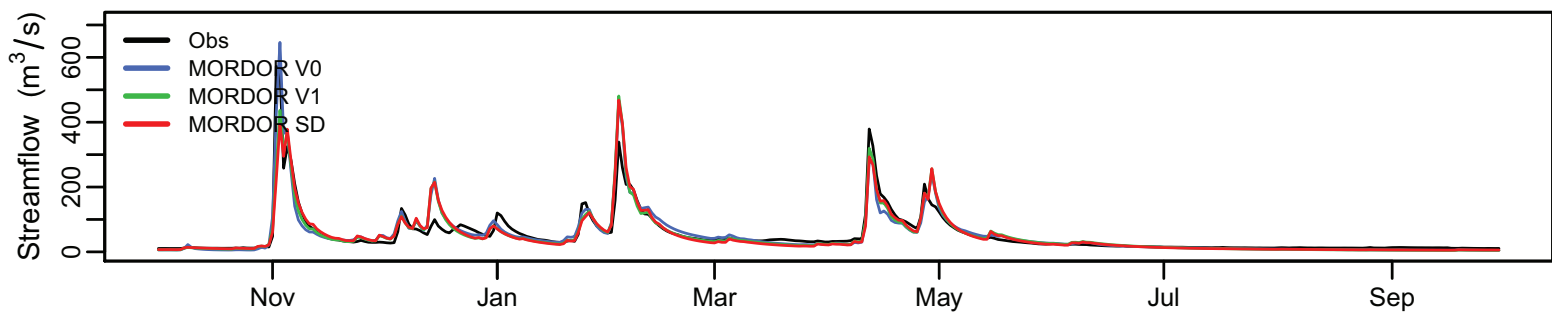

Year 2010

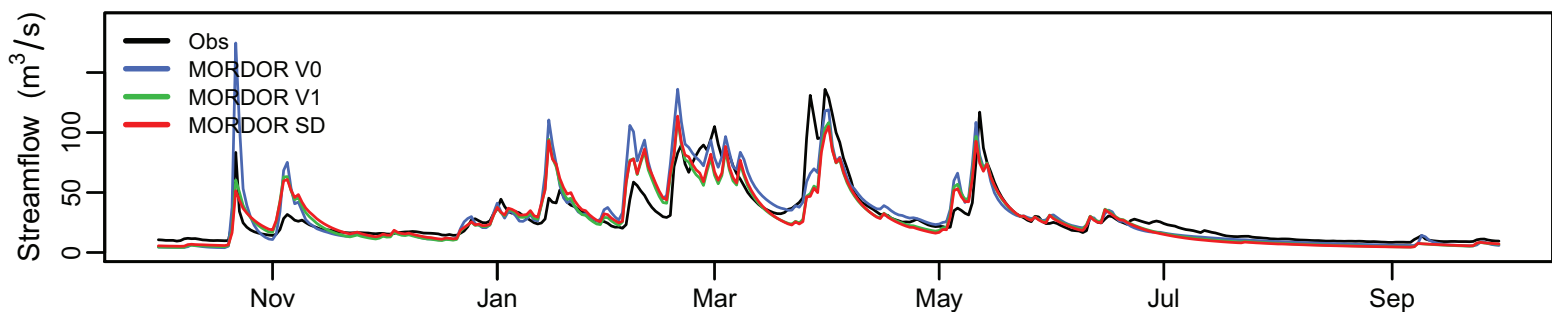



# Tarn@Montbrun

Year 1986

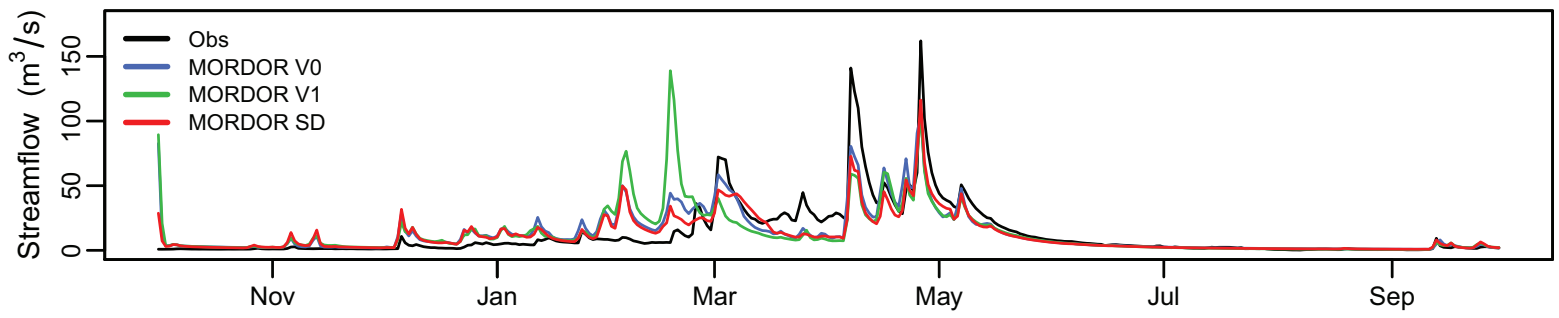

Year 1987

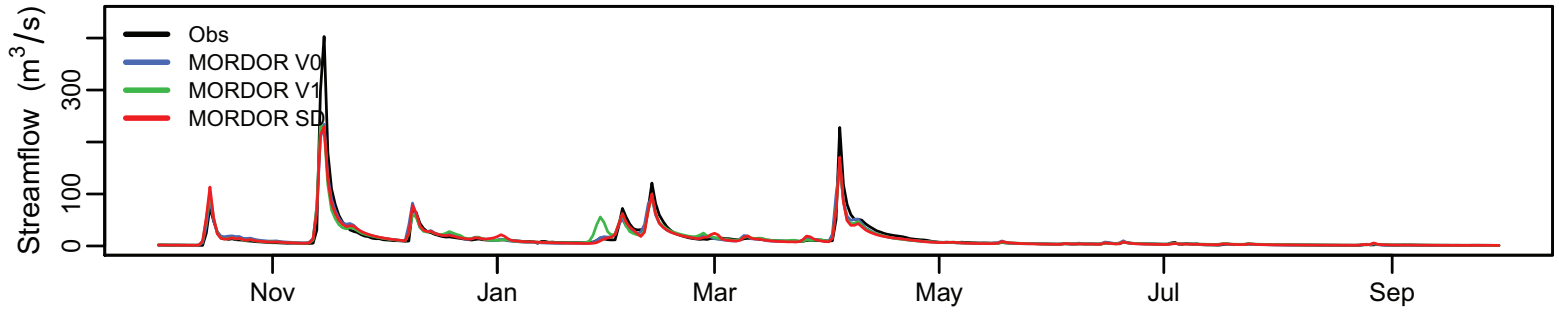

Year 1988

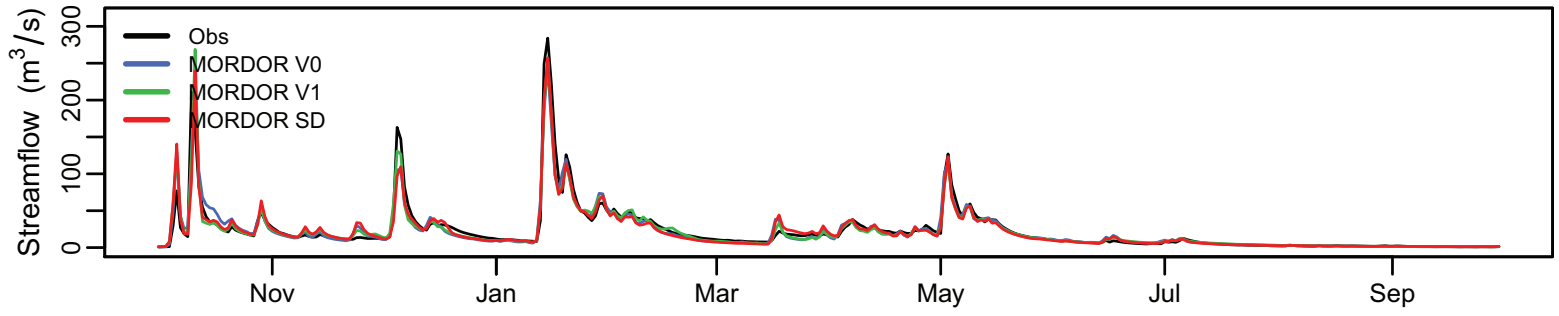

Year 1989

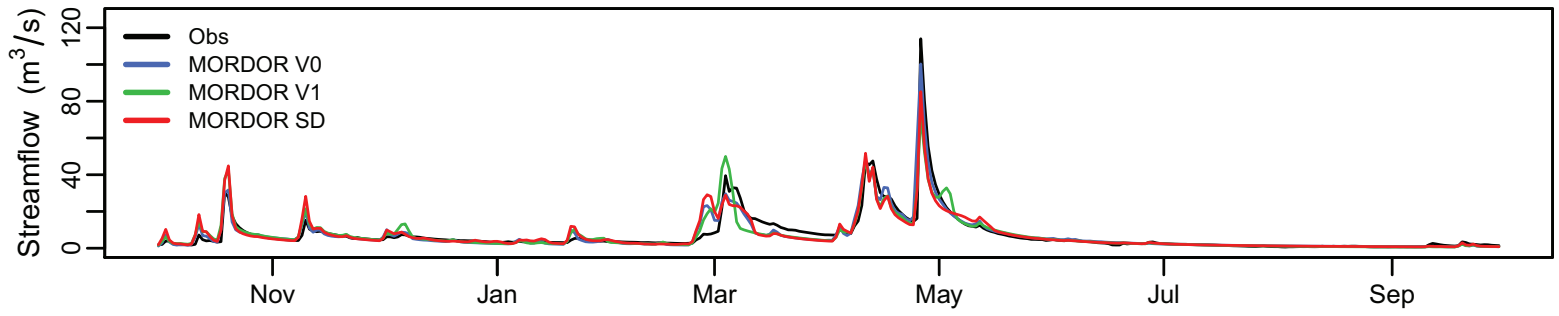

Year 1990

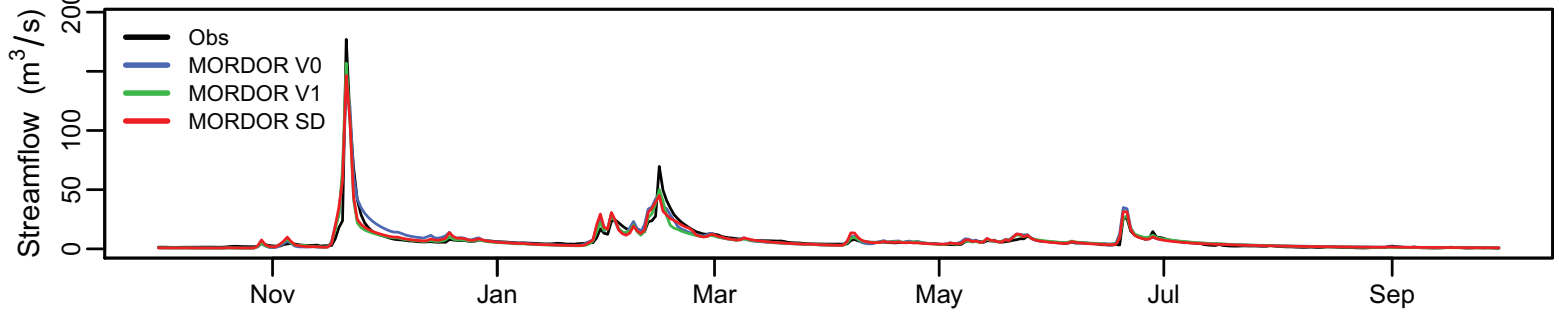

Year 1991

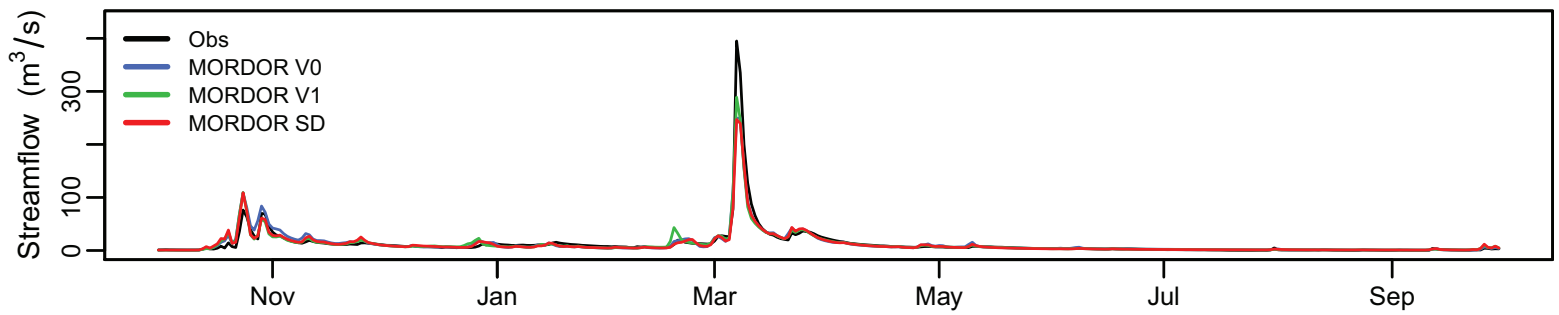

# Tarn@Montbrun

Year 1992

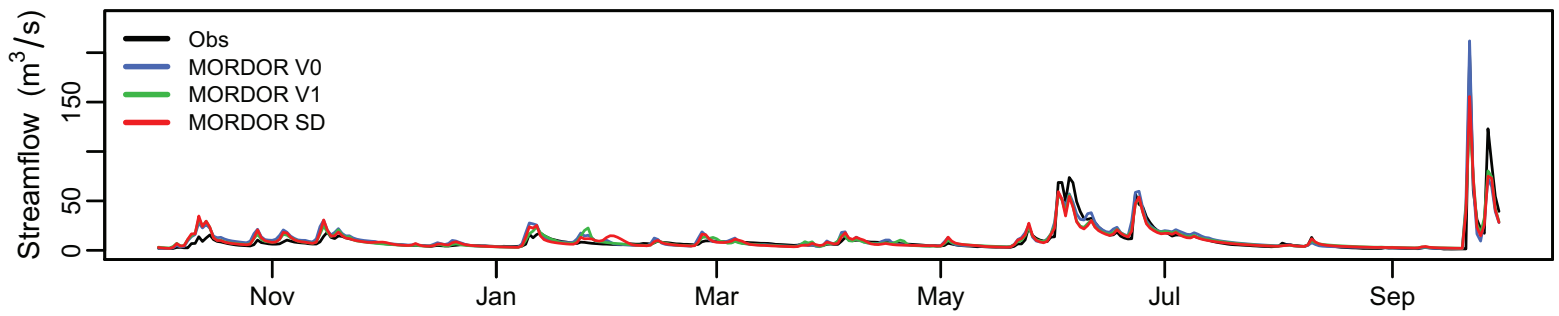

Year 1993

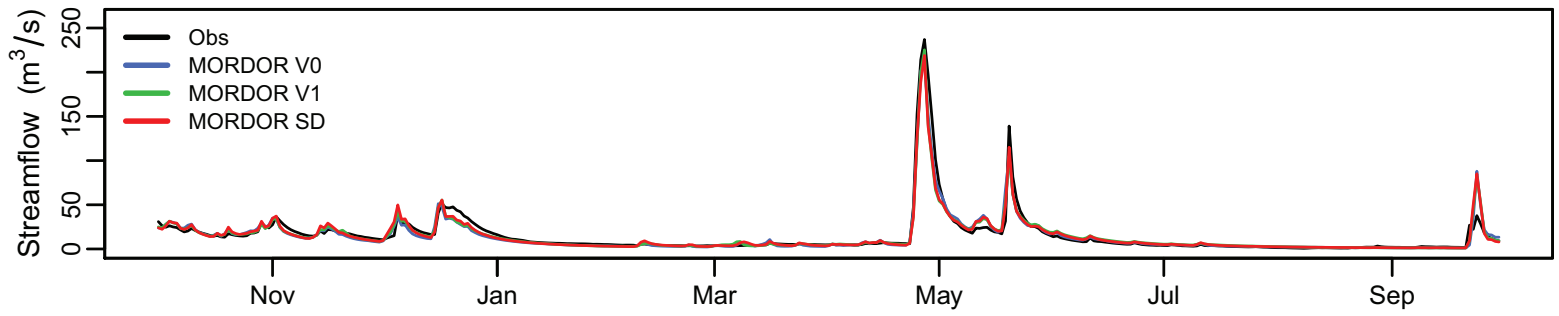

Year 1994

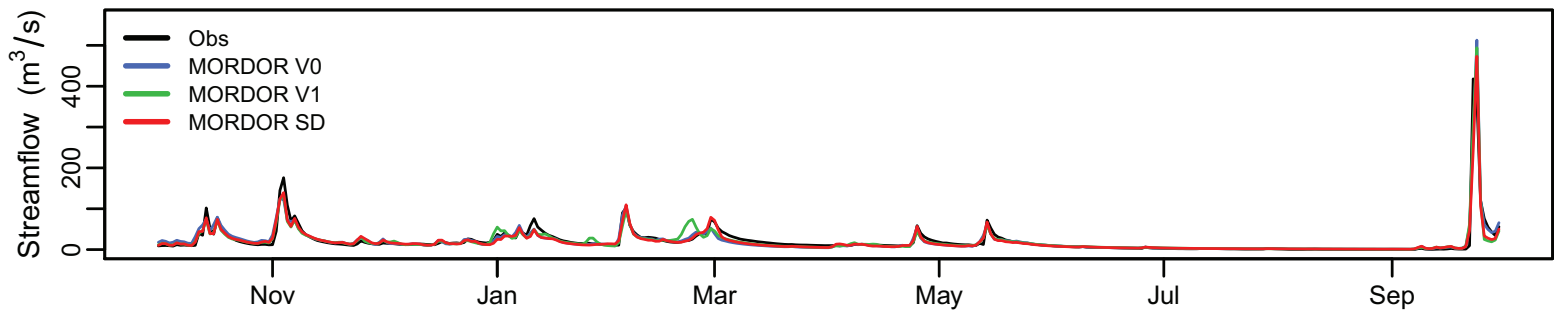

Year 1995

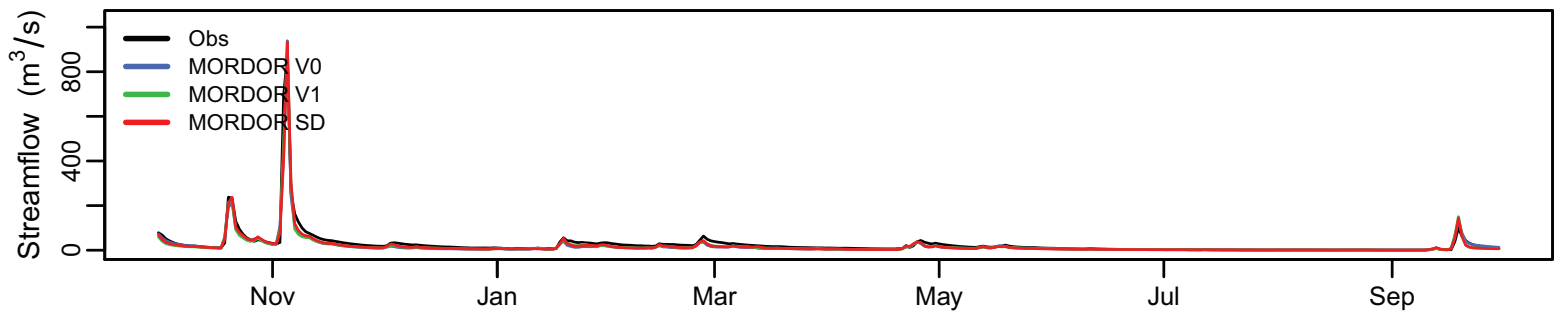

Year 1996

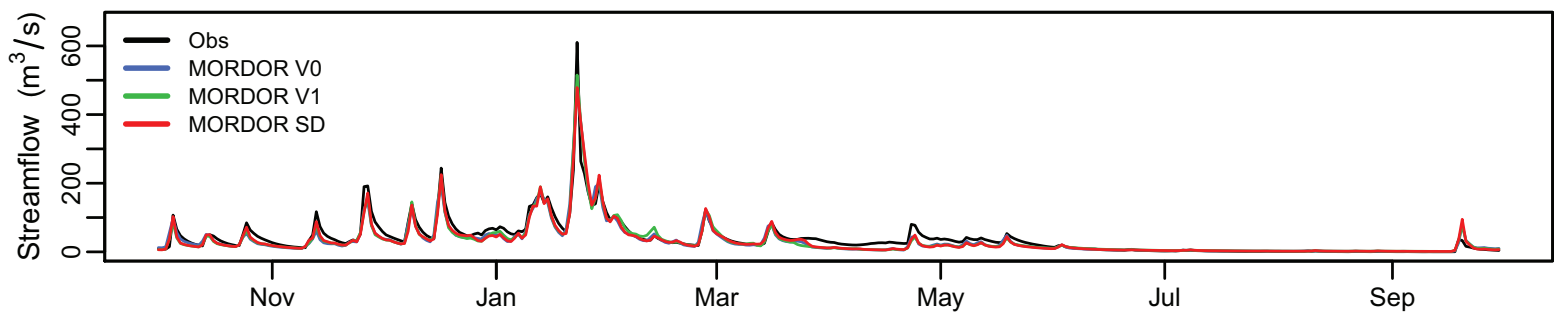

Year 1997

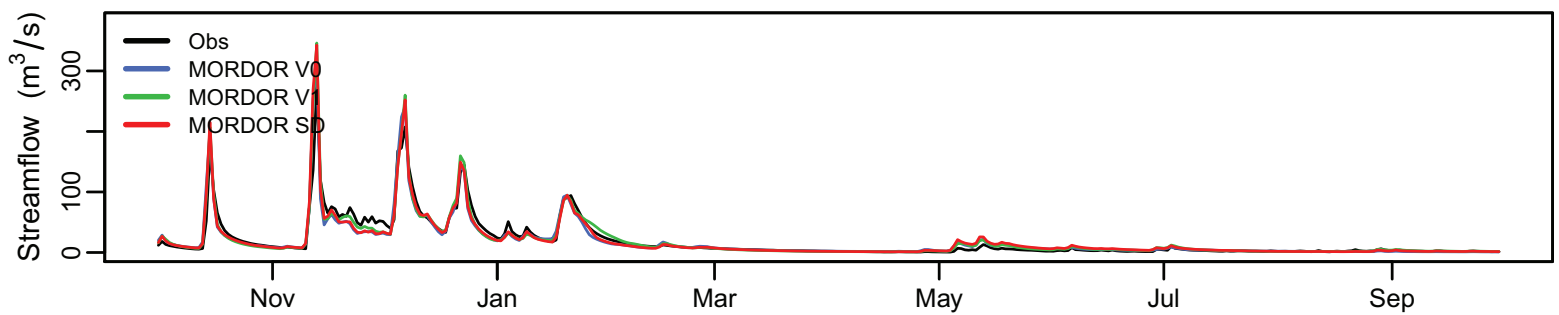

# Tarn@Montbrun

Year 1998

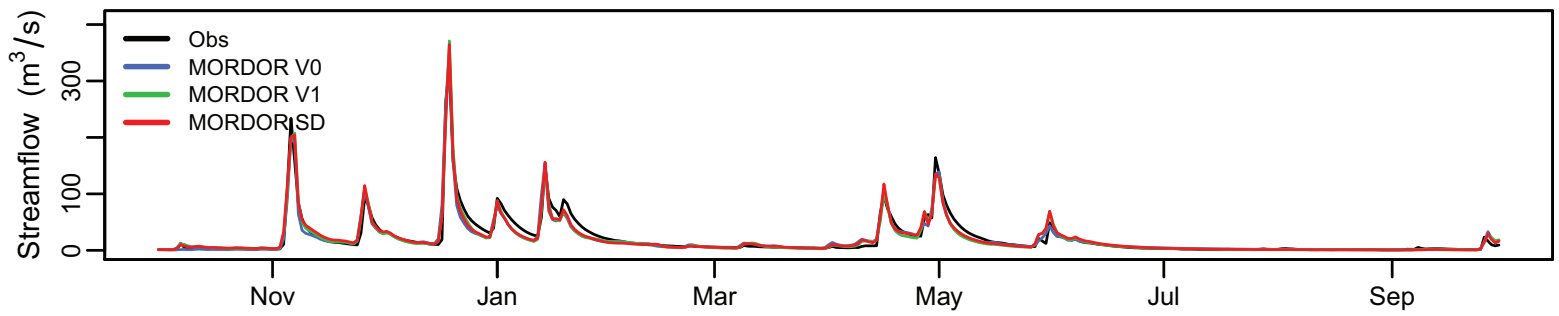

Year 1999

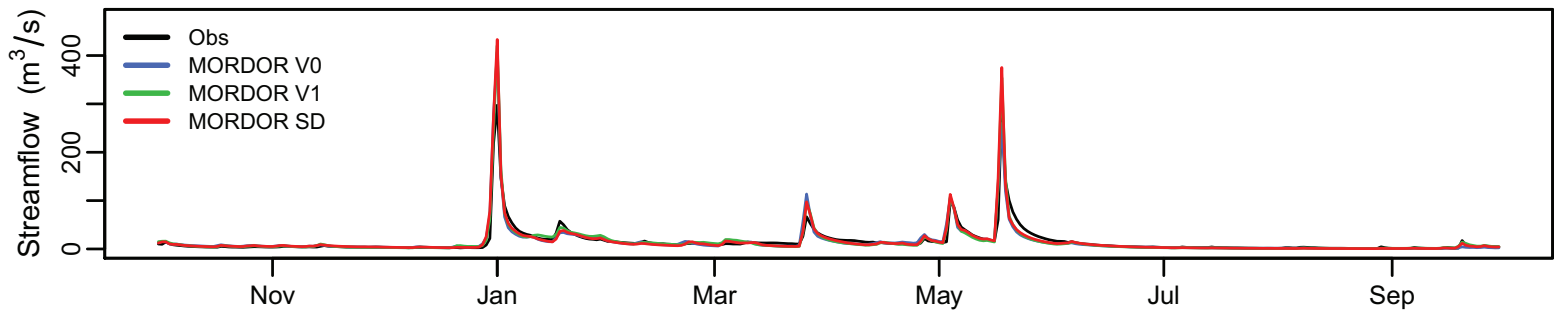

Year 2000

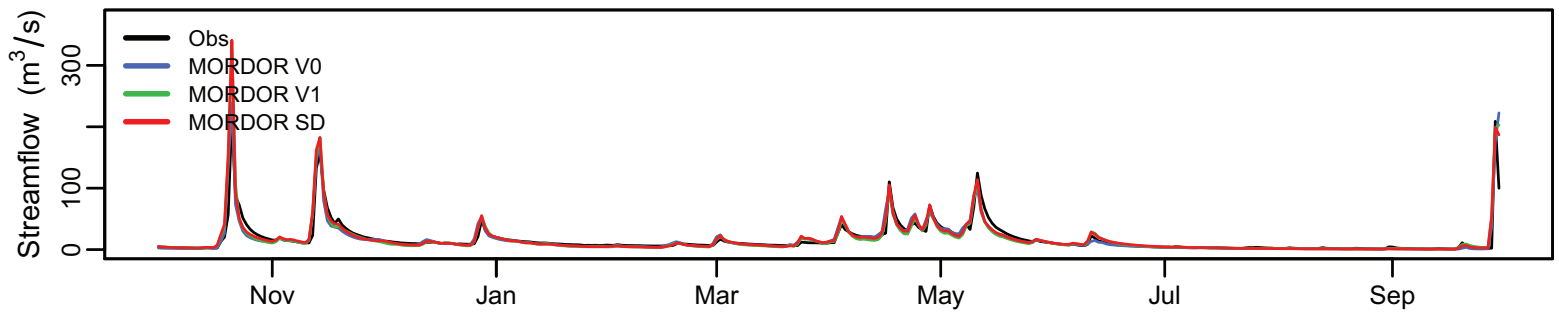

Year 2001

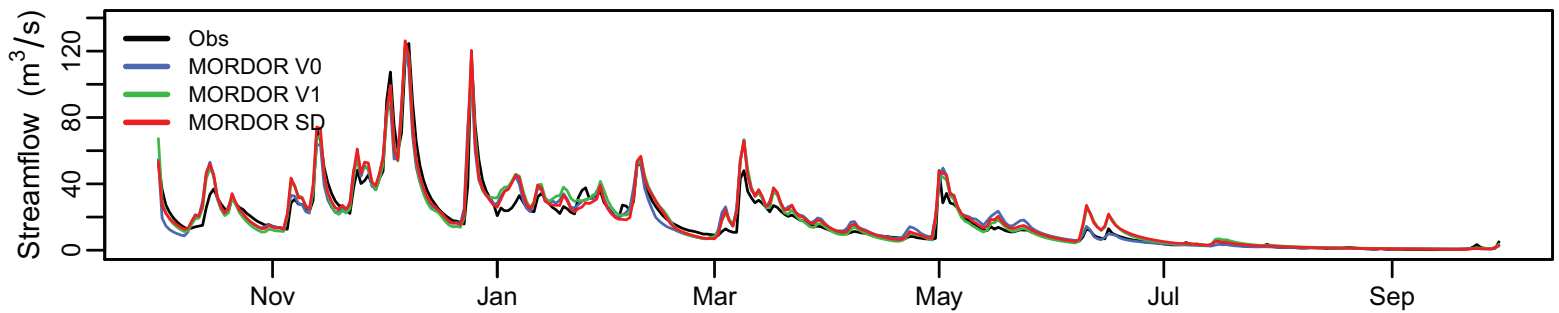

Year 2002

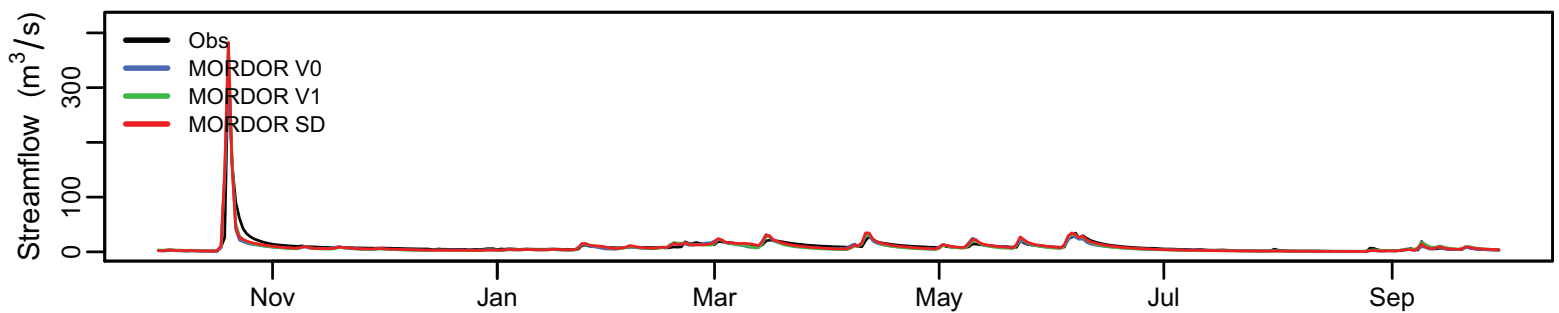

Year 2003

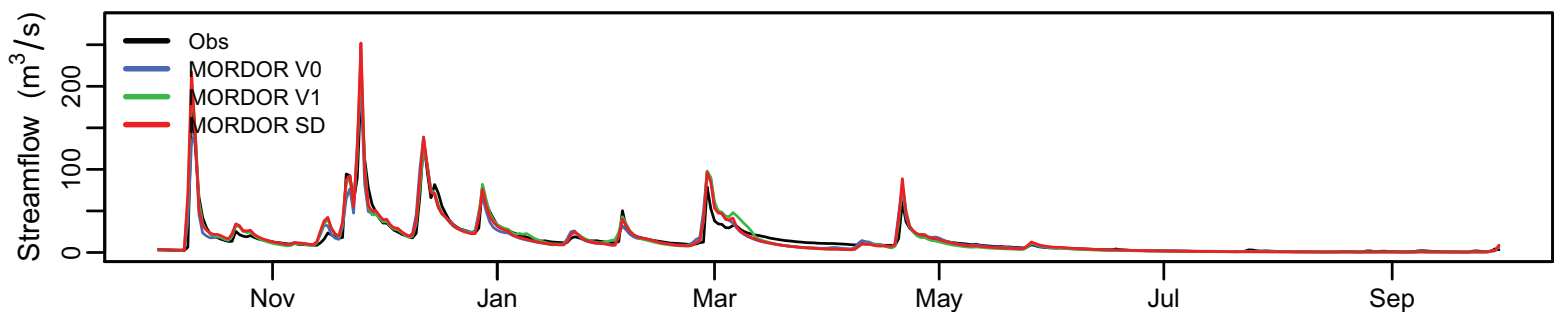

# Tarn@Montbrun

Year 2004

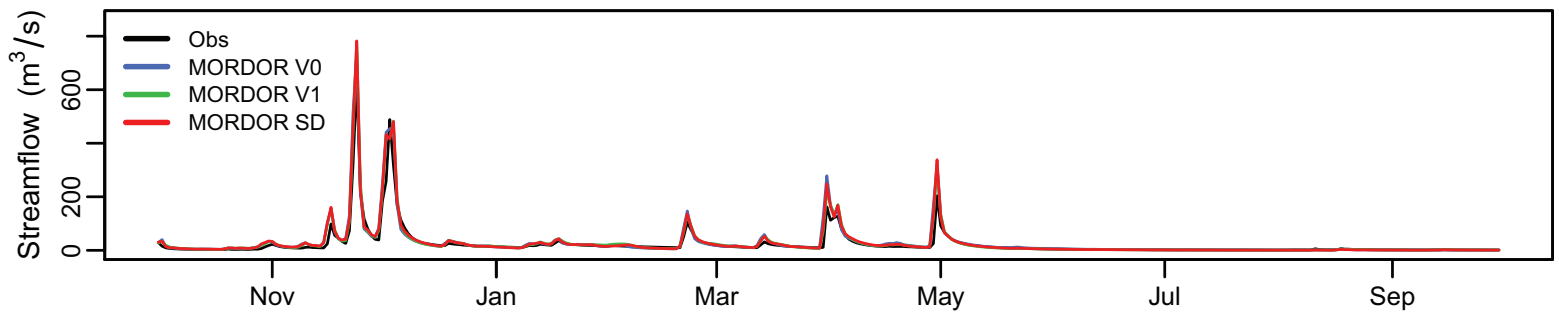

Year 2005

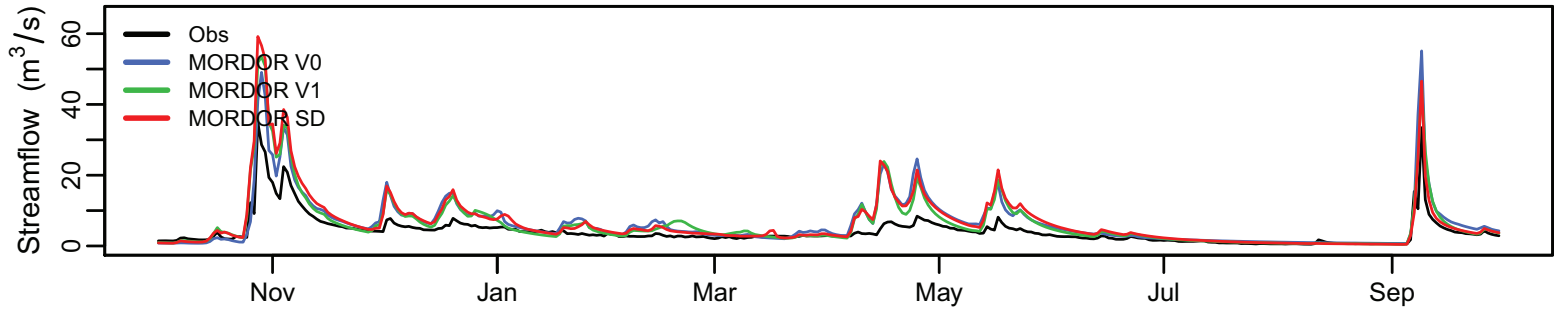

Year 2006

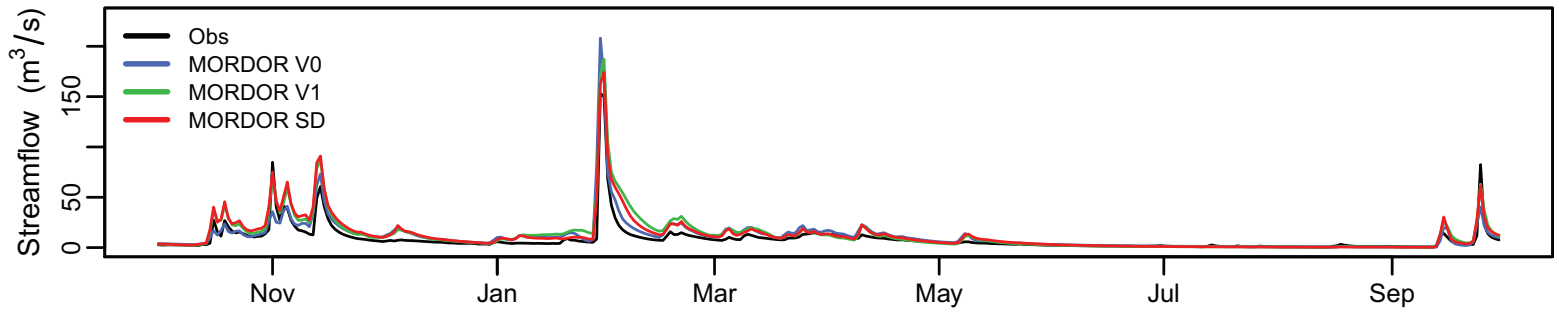

# Tarn@Pinet

Year 1981

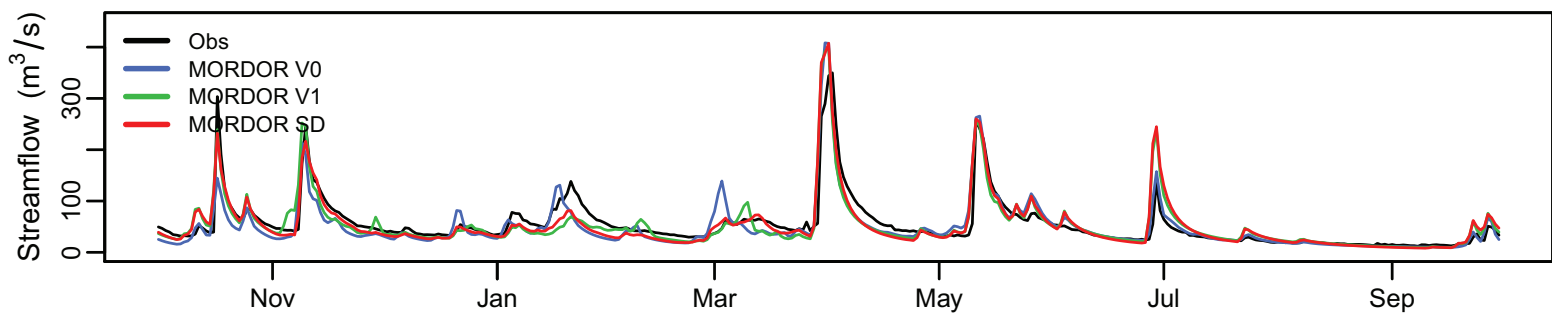

Year 1982

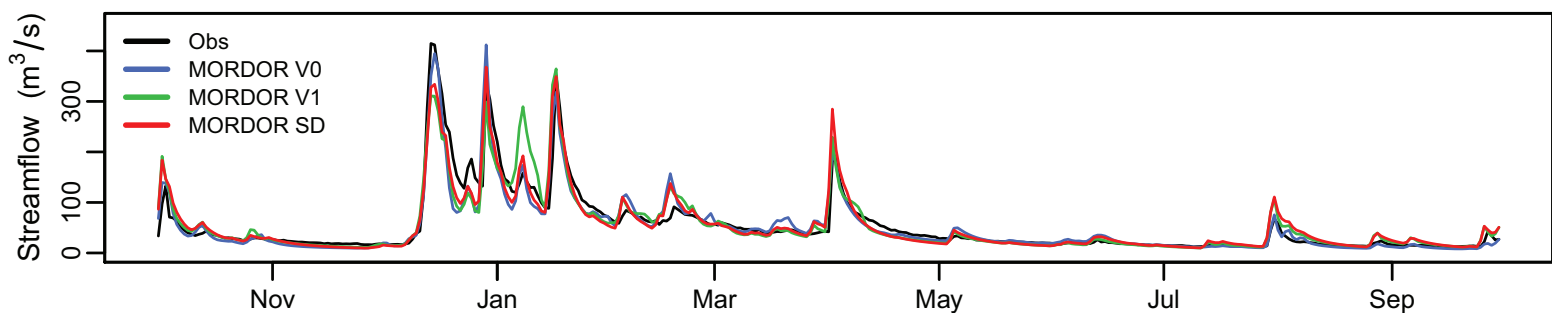

Year 1983

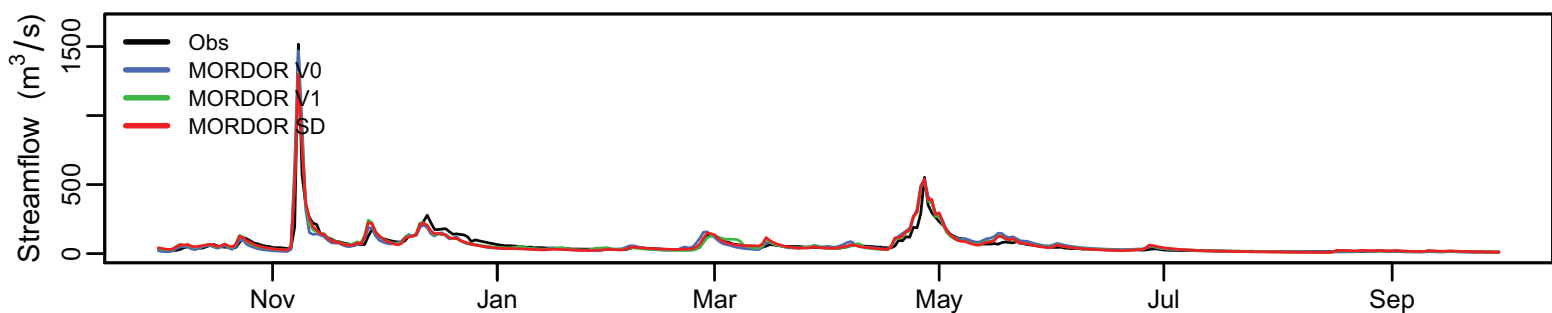

Year 1984

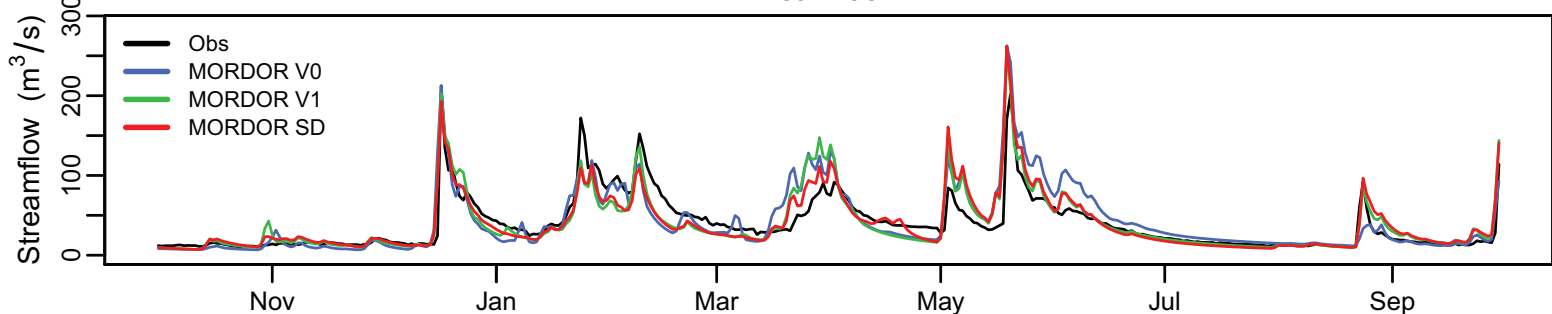

Year 1985

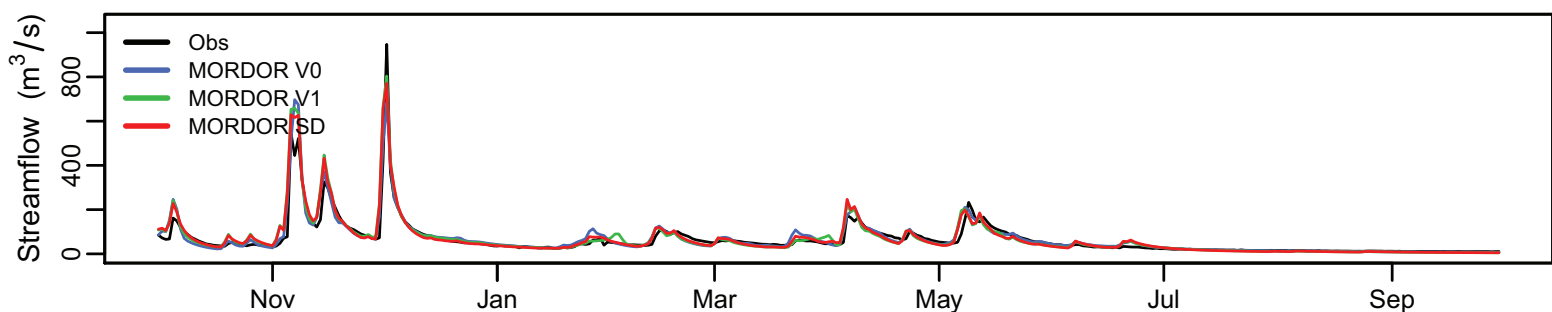

Year 1986

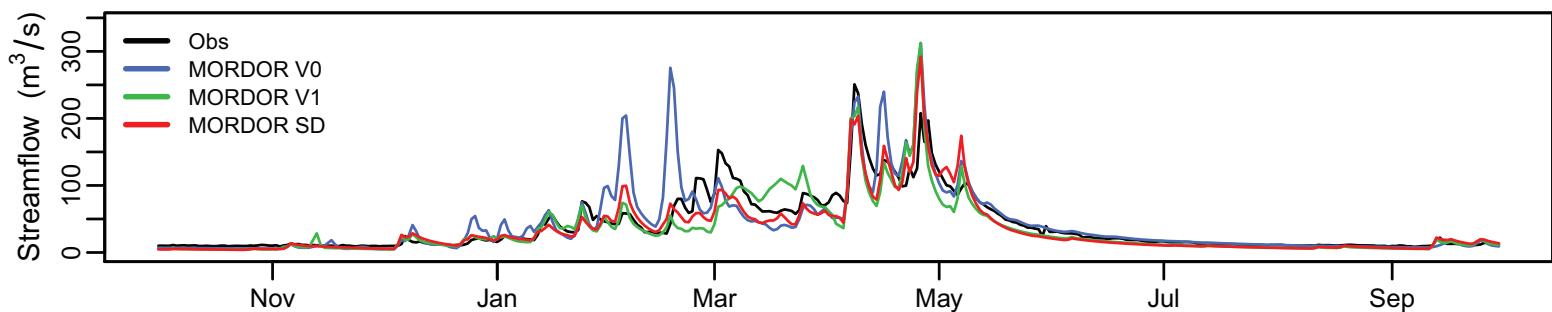

# Tarn@Pinet

Year 1987

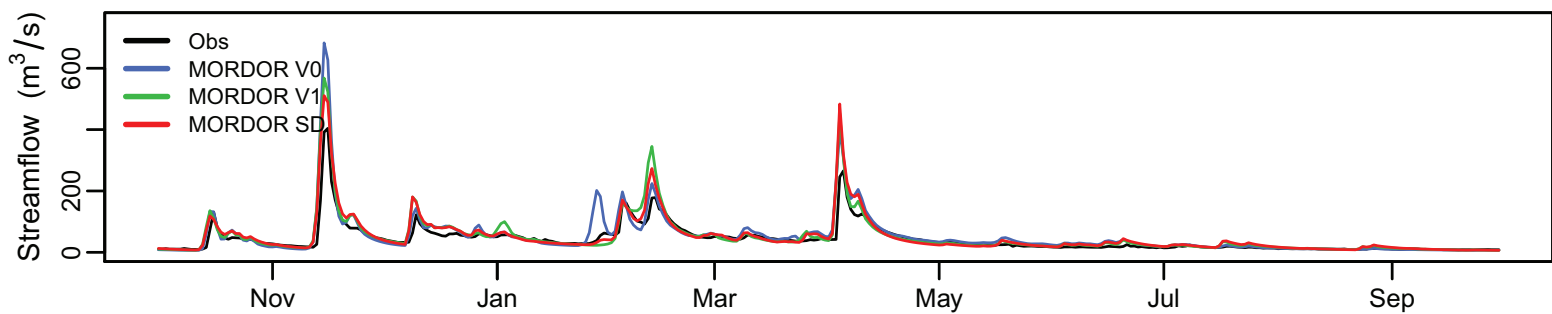

Year 1988

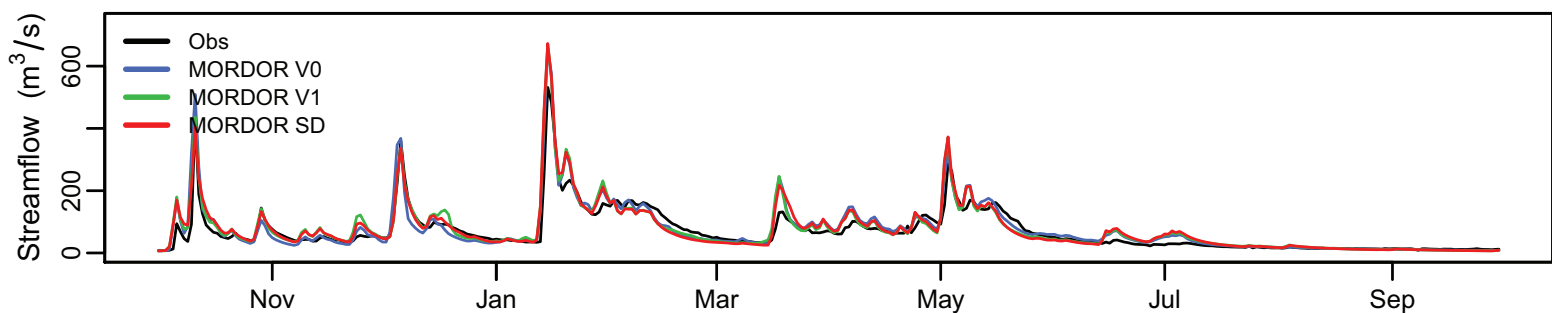

Year 1989

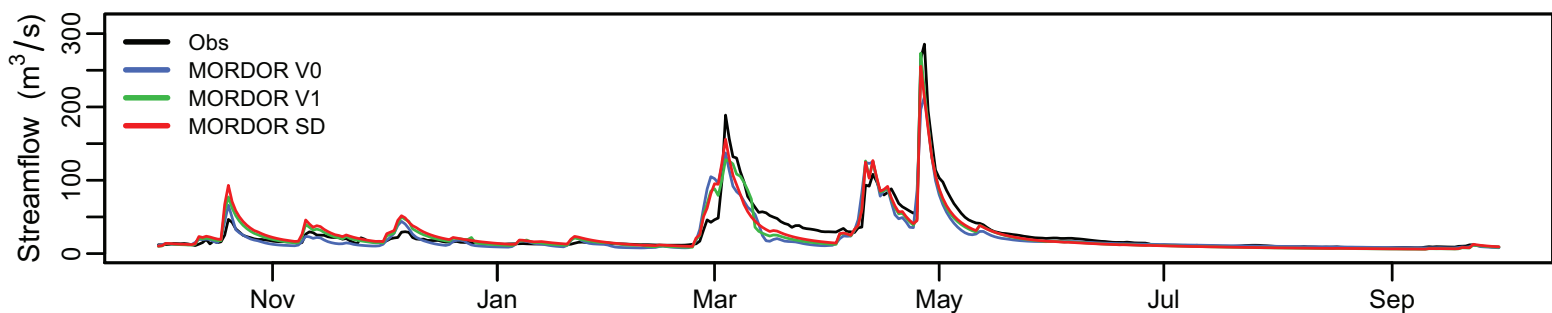

Year 1990

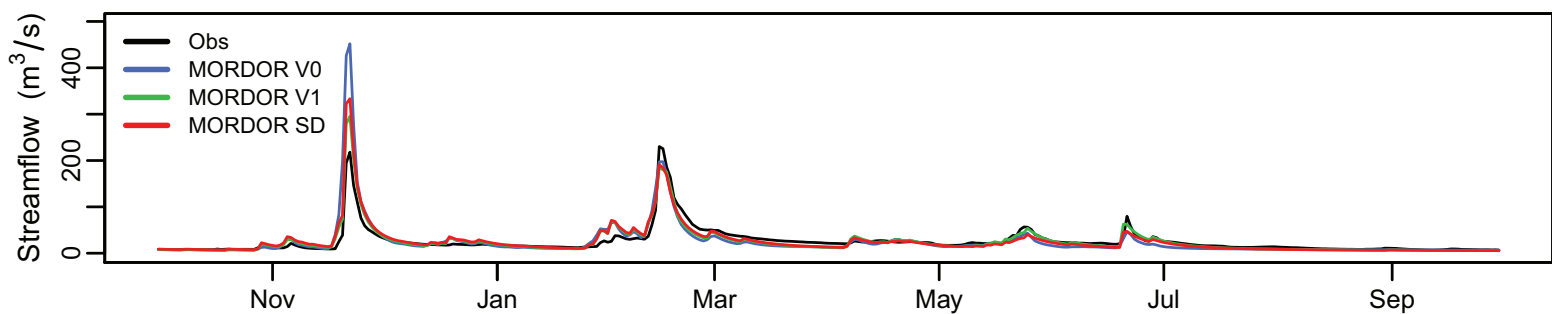

Year 1991

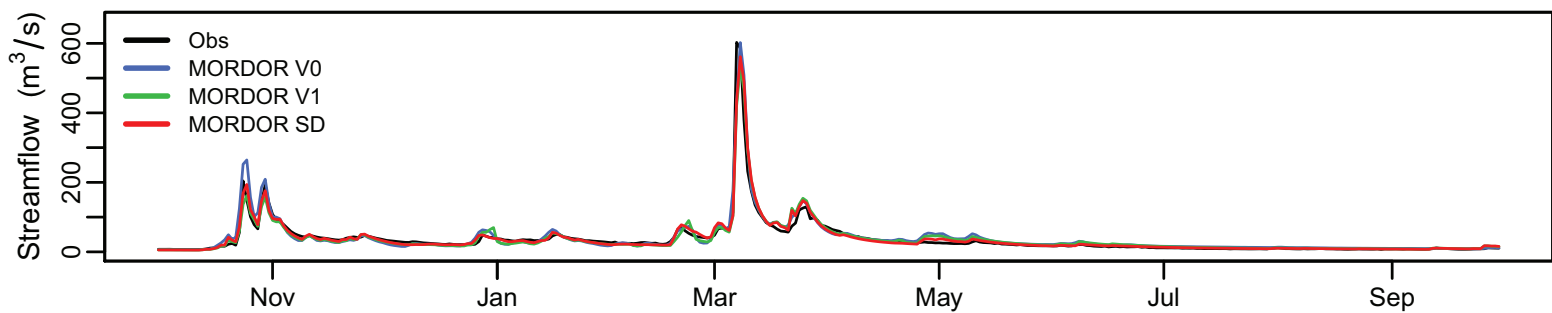

Year 1992

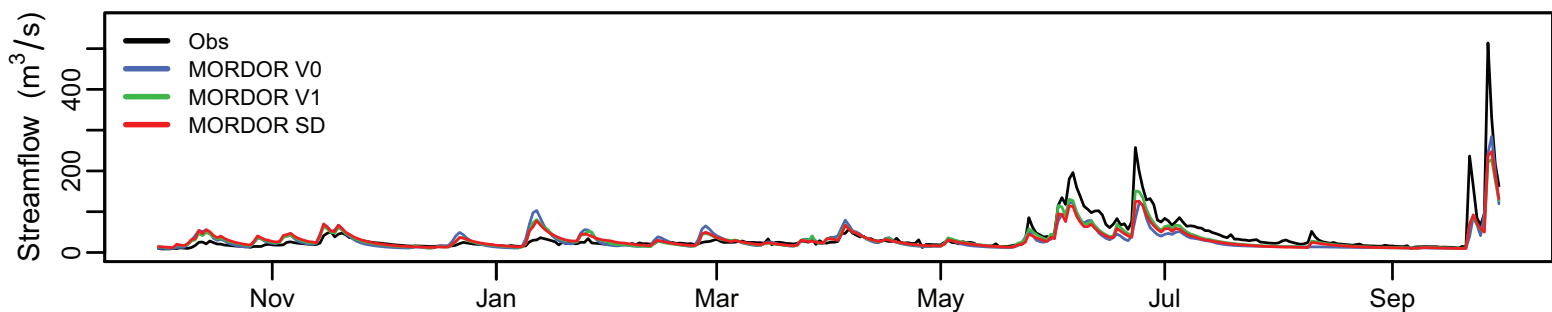

# Tarn@Pinet

Year 1993

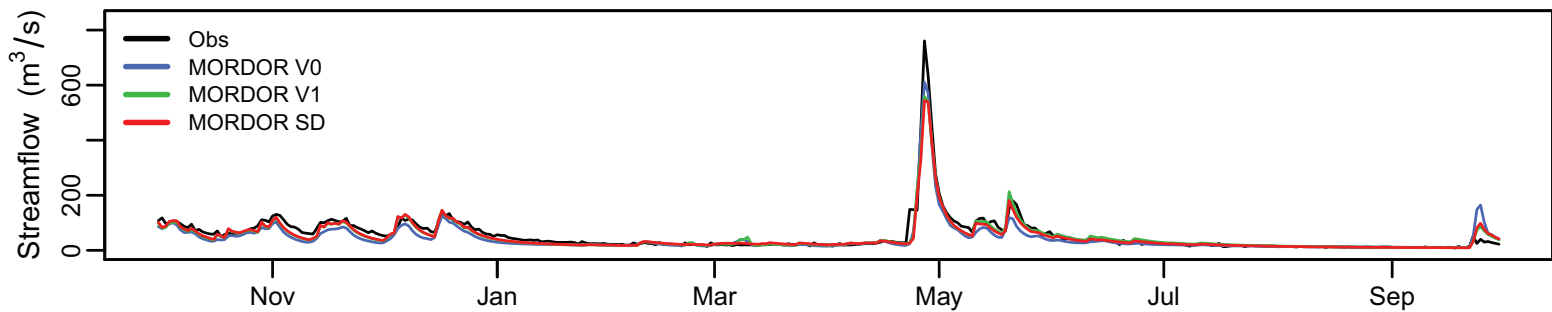

Year 1994

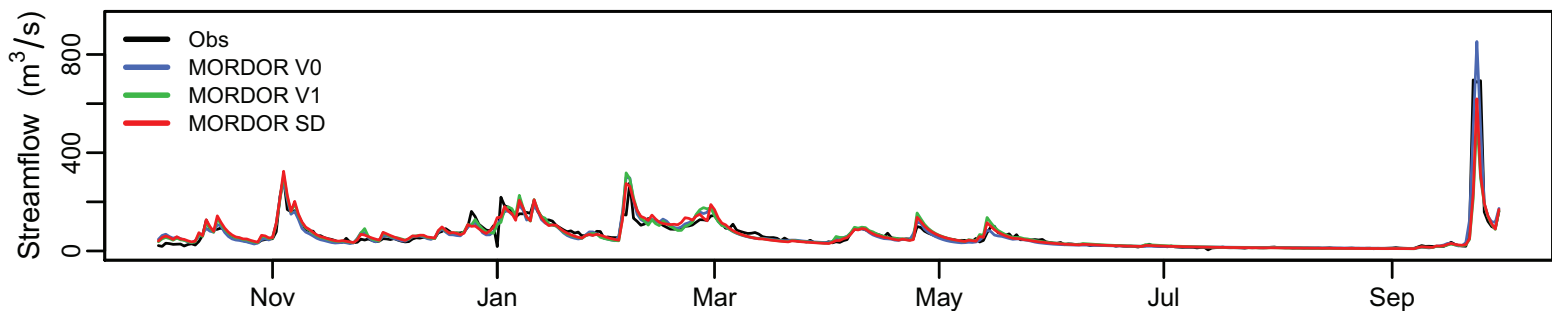

Year 1995

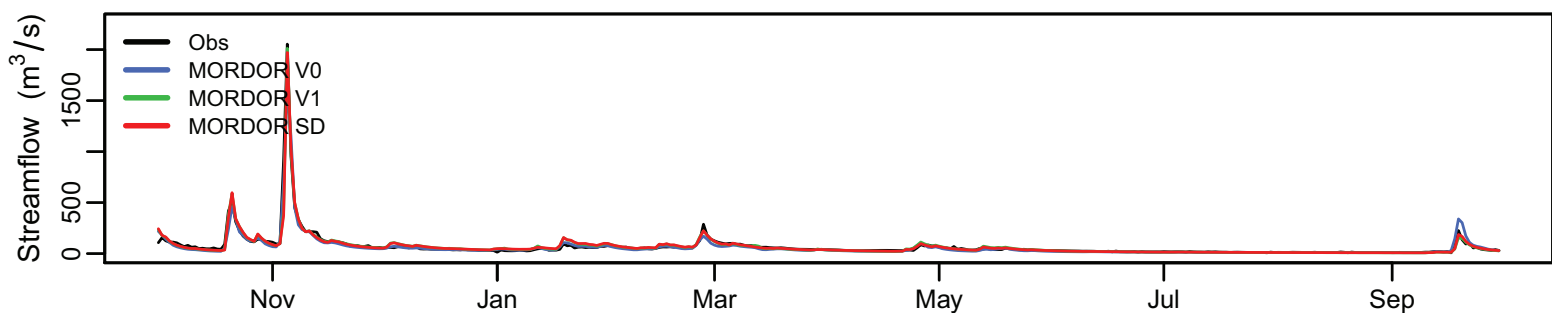

# Tarnon@Florac

Year 1986

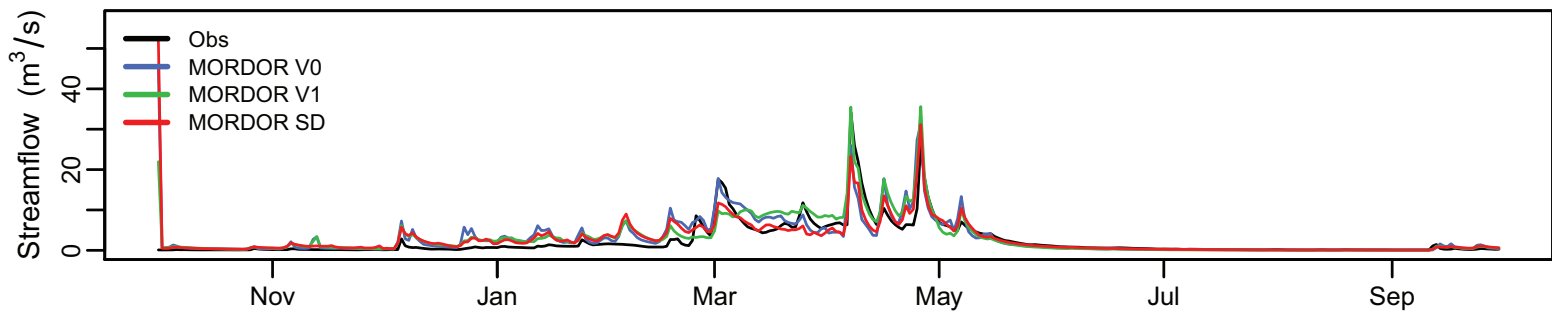

Year 1987

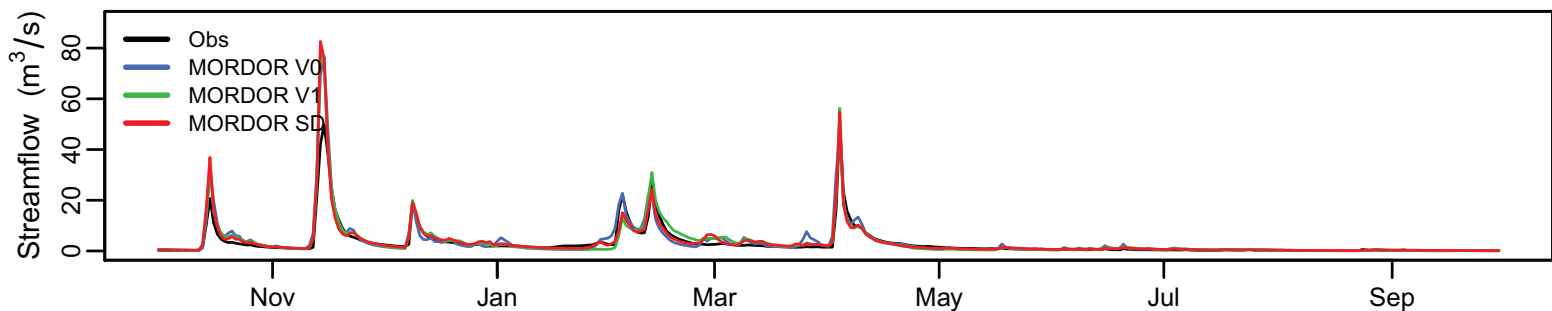

Year 1988

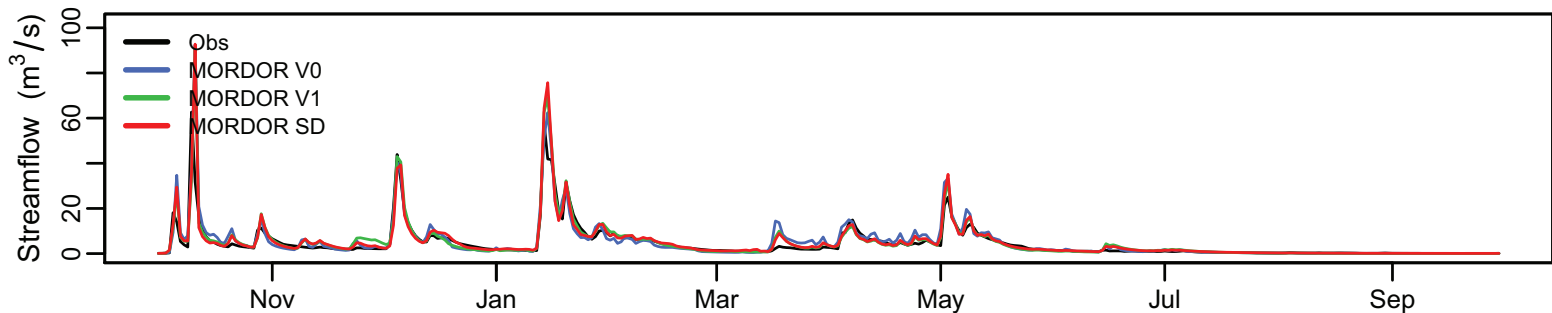

Year 1989

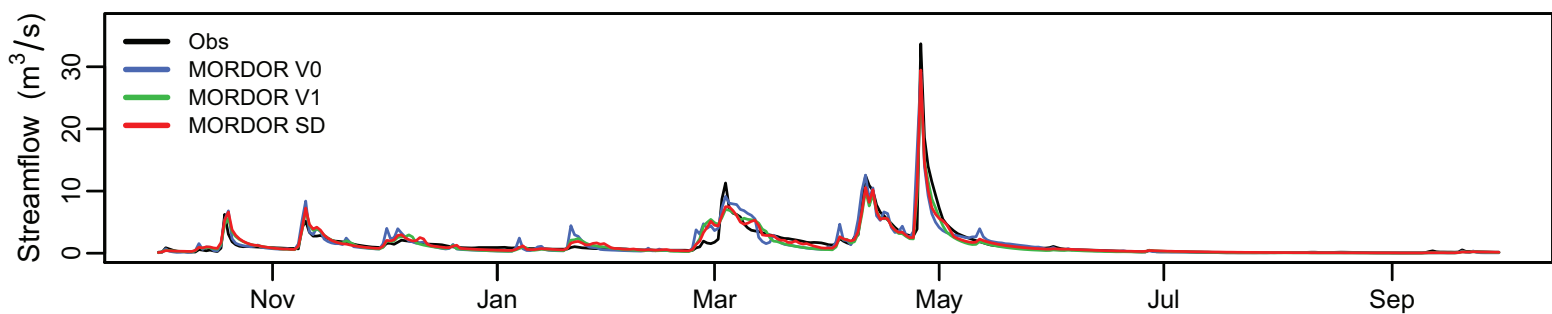

Year 1990

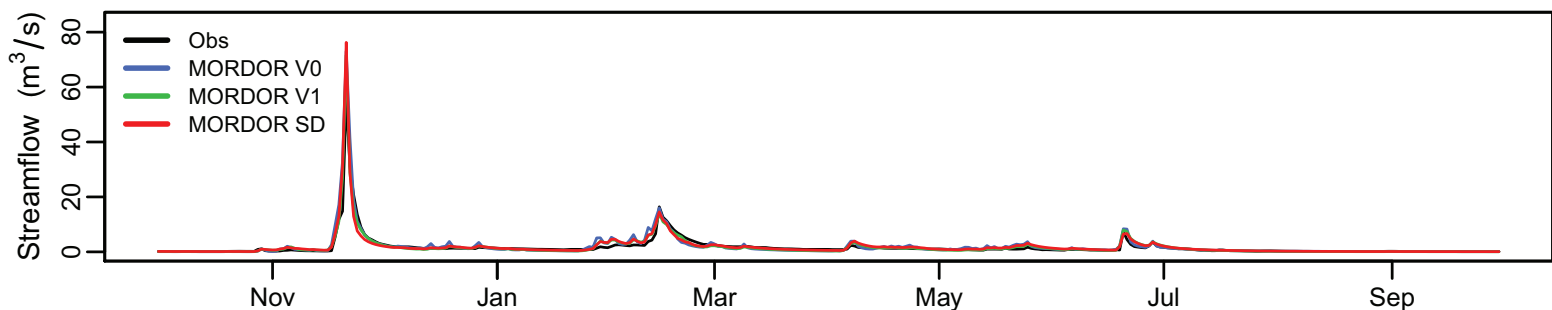

Year 1991

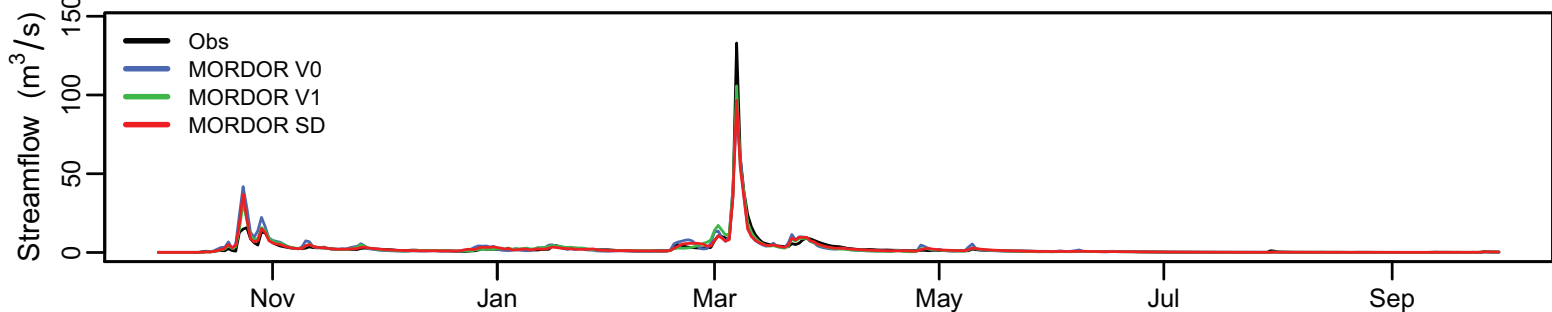



# Tarnon@Florac

Year 1992

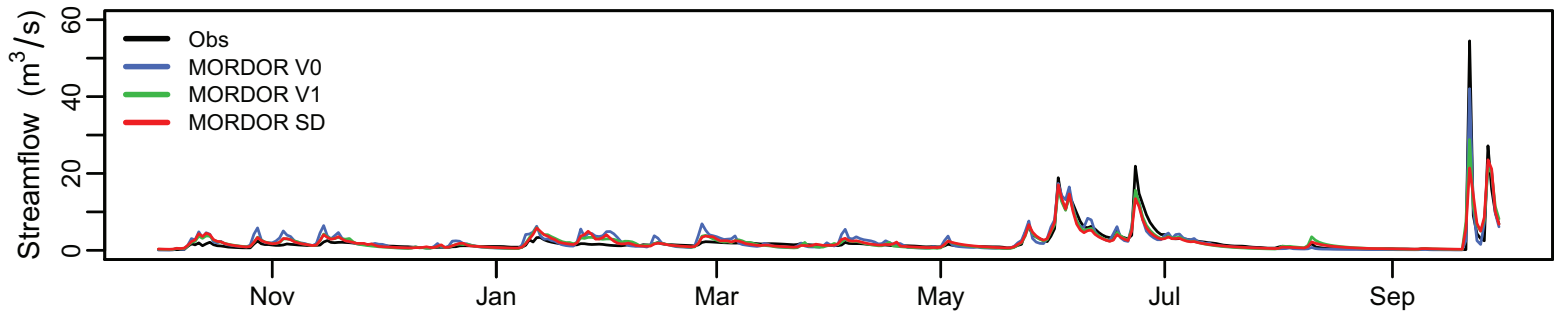

Year 1993

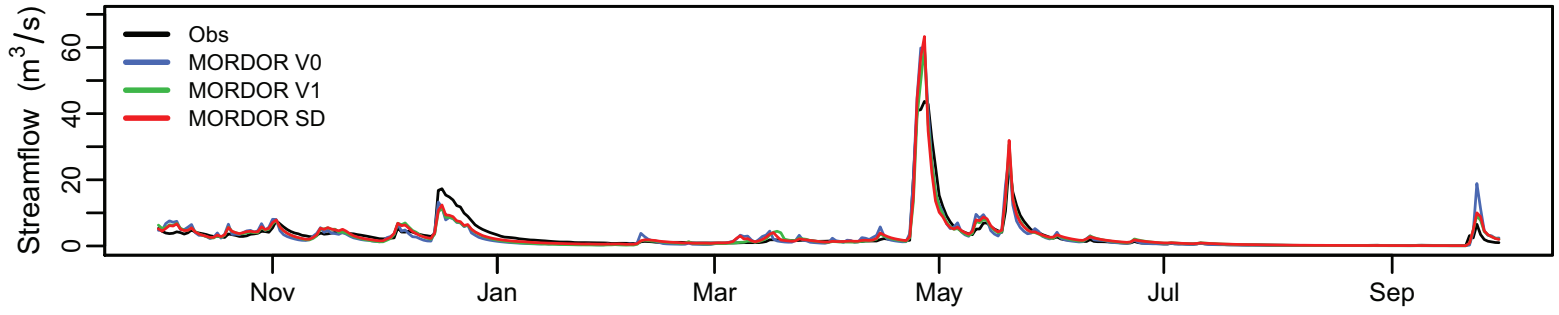

Year 1994

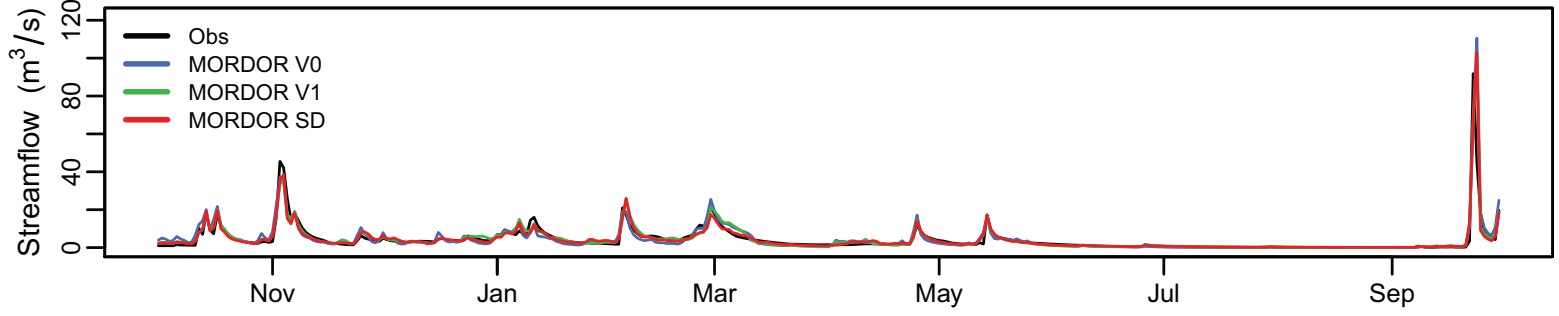

Year 1995

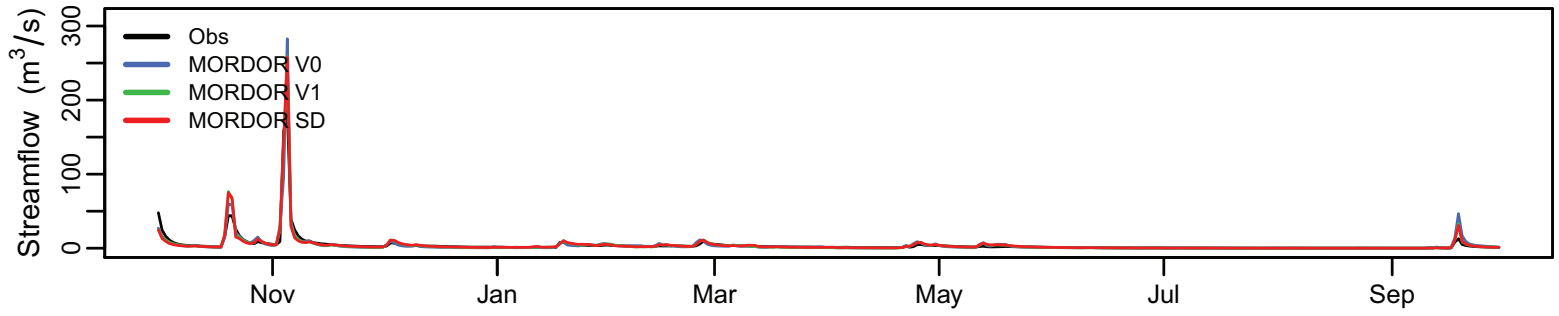

Year 1996

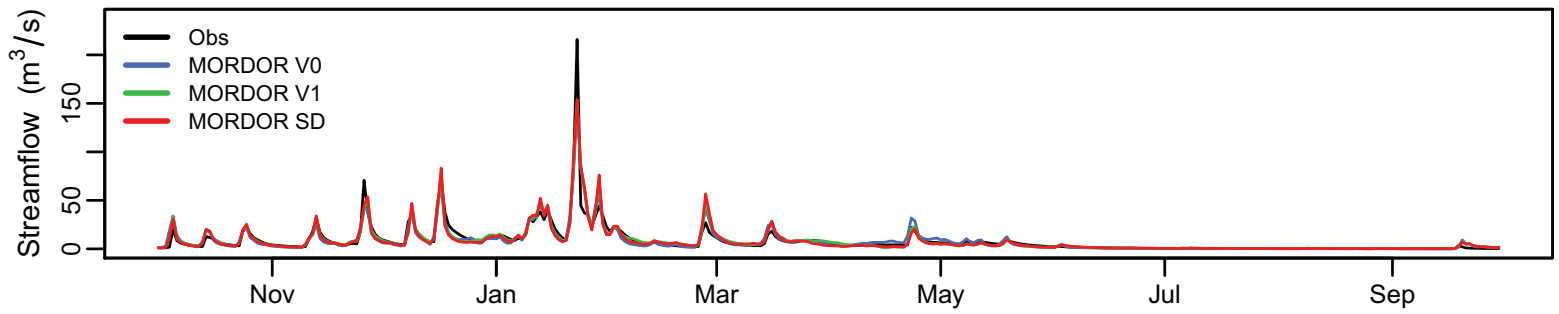

Year 1997

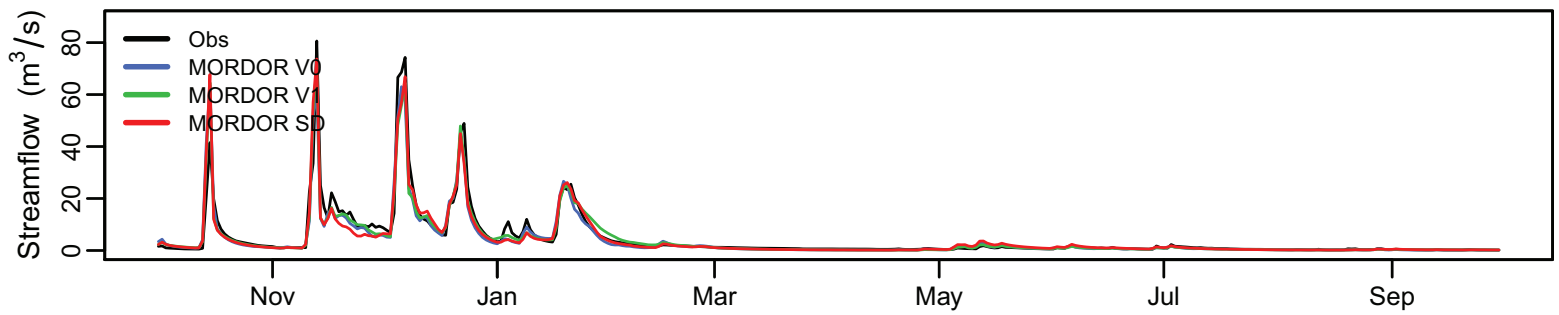

# Tarnon@Florac

Year 1998

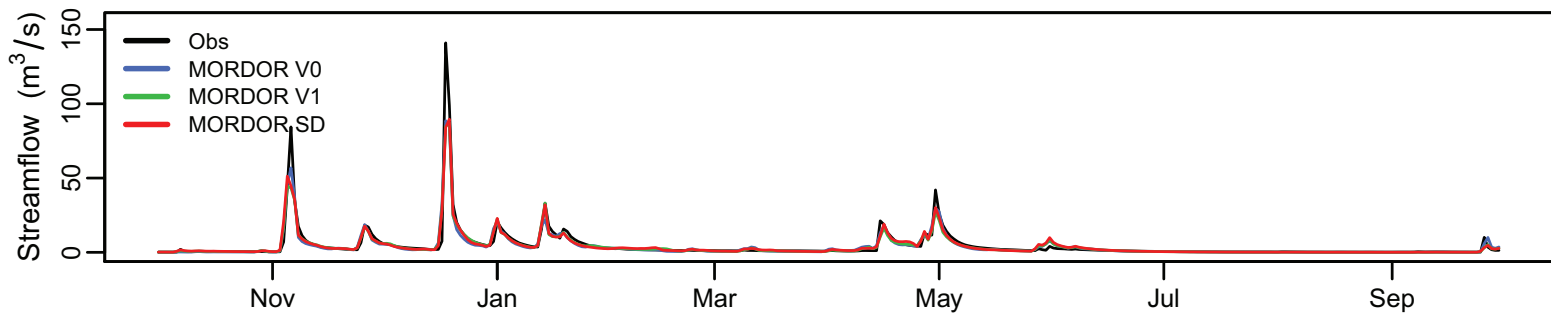

Year 1999

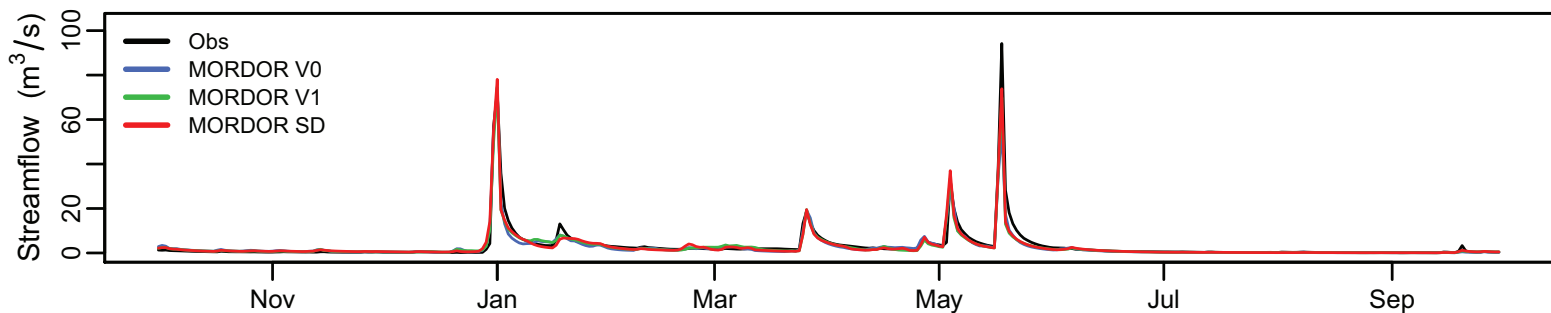

Year 2000

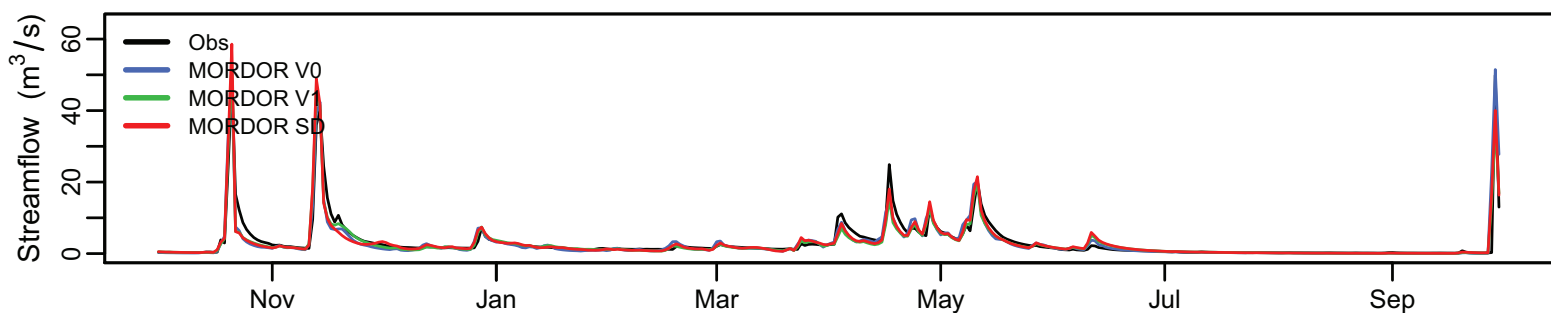

Year 2001

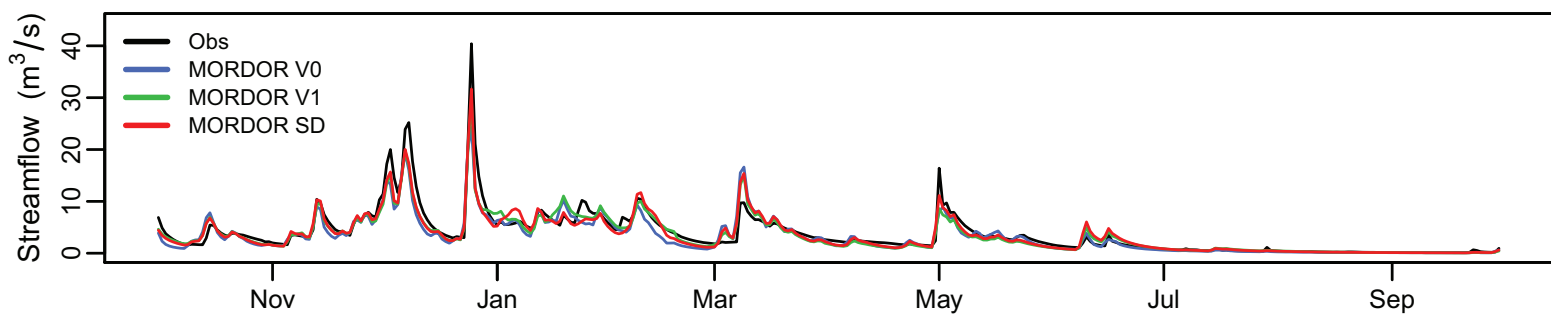

Year 2002

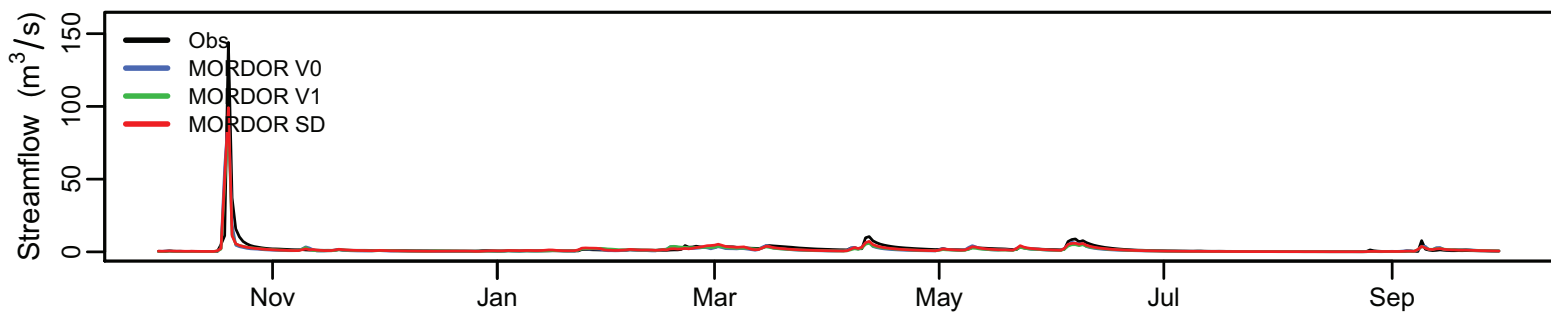

Year 2003

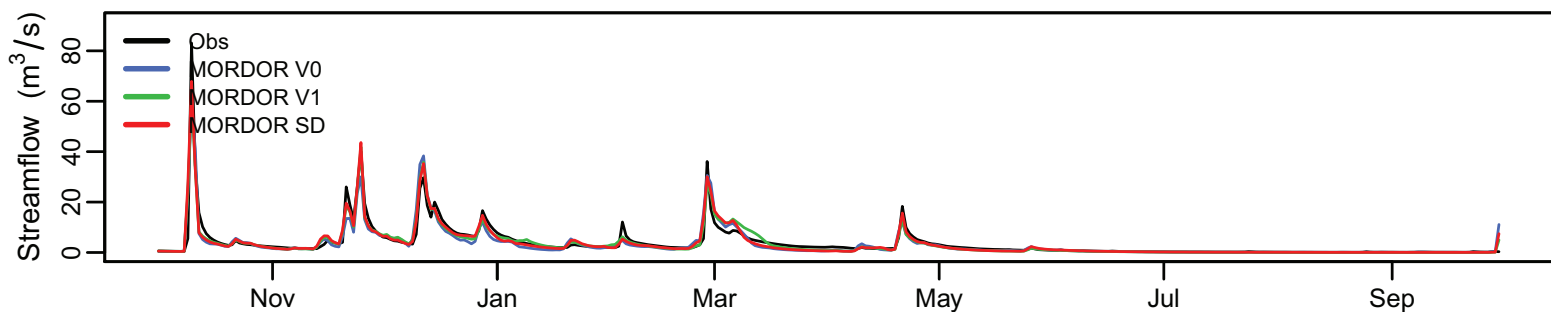

# Tarnon@Florac

Year 2004

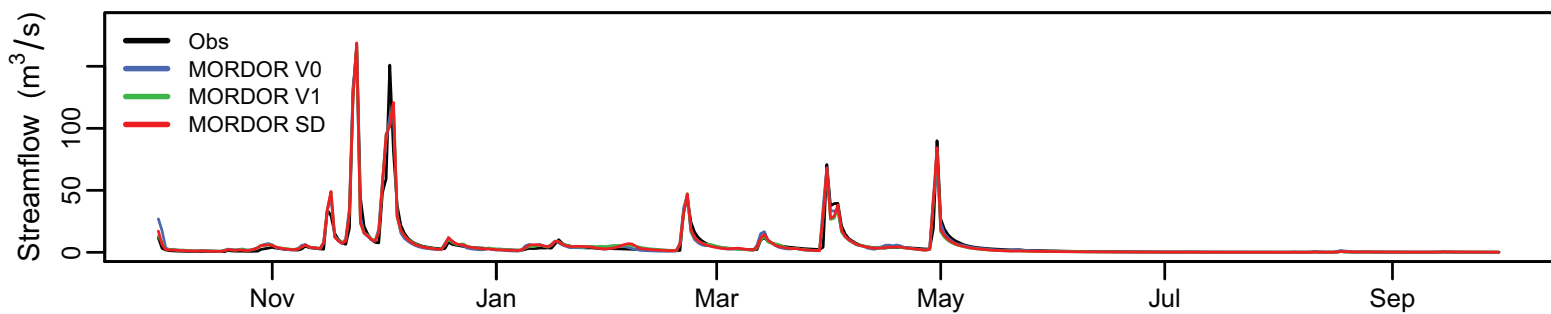

Year 2005

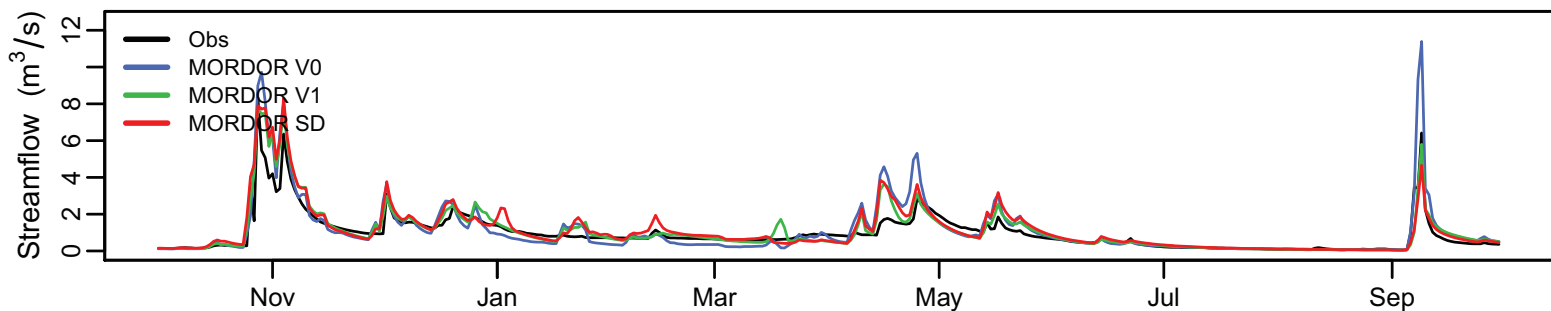

Year 2006

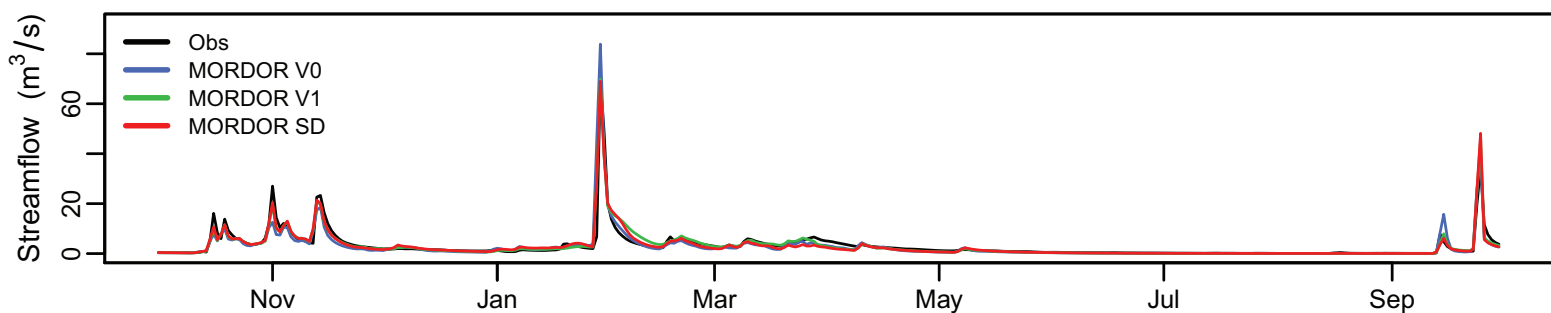

# Taurion@RocheTalamie

Year 1958

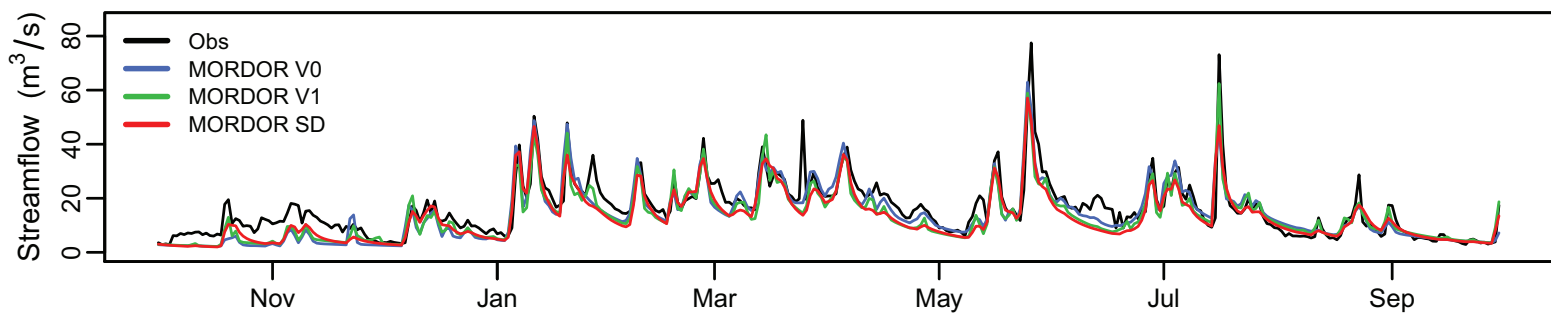

Year 1959

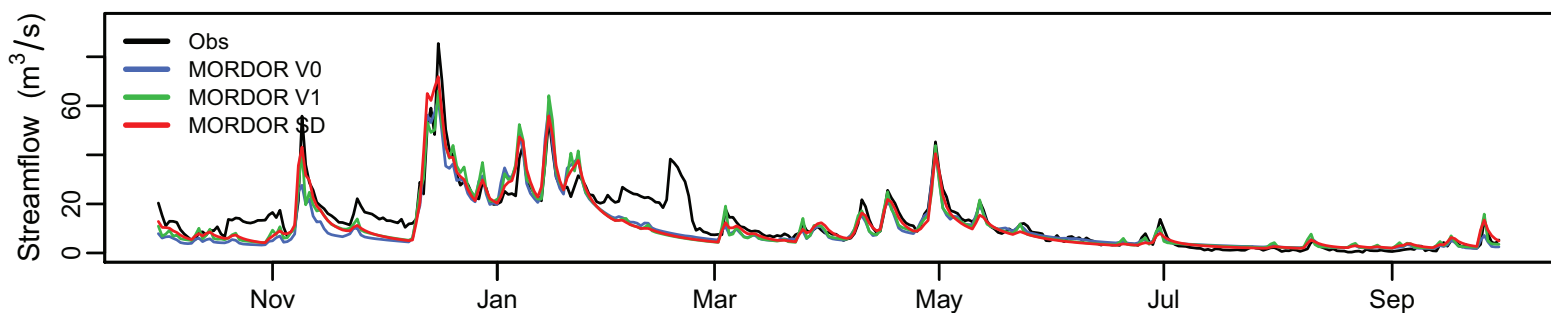

Year 1960

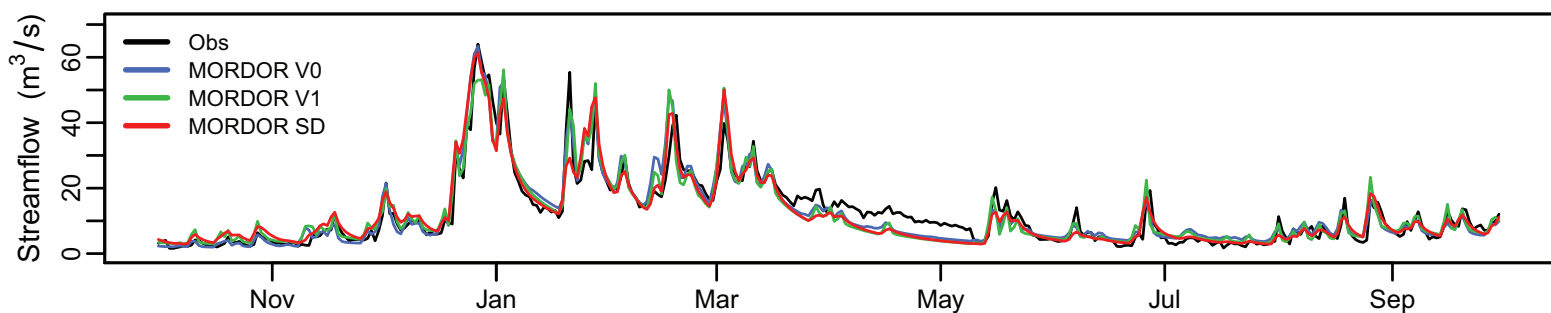

Year 1961

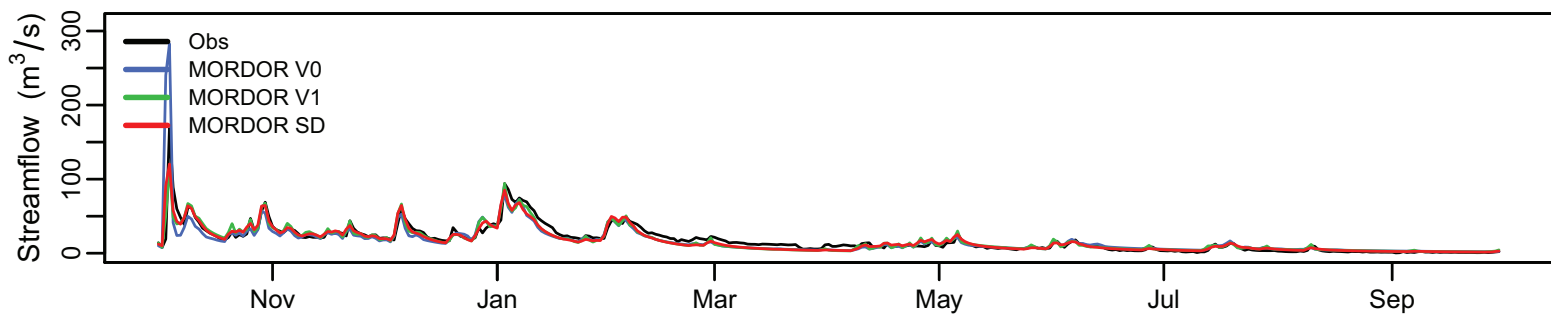

Year 1962

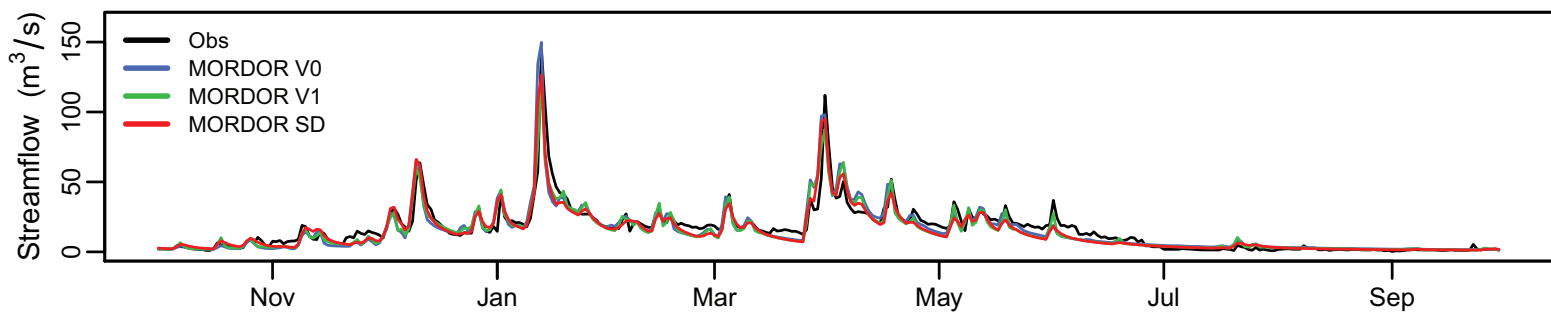

Year 1963

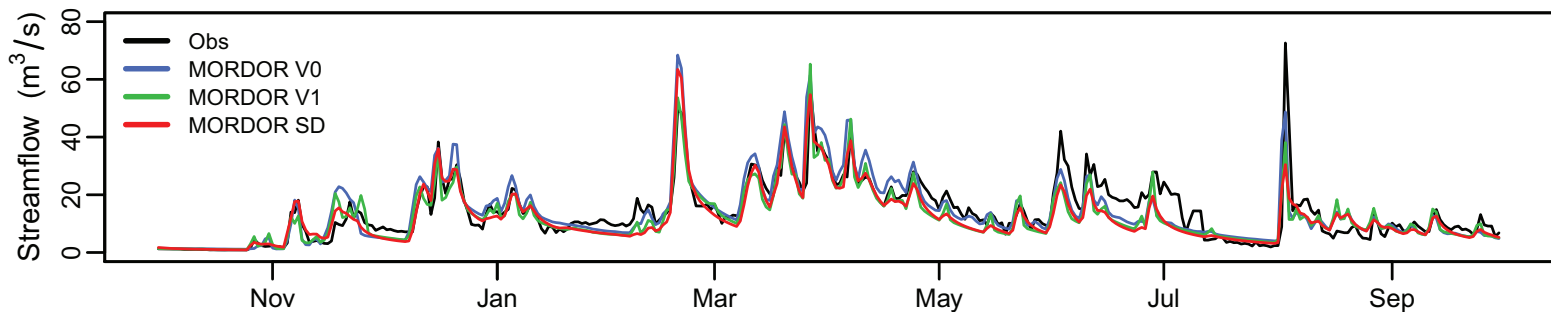

# Taurion@RocheTalamie

Year 1964

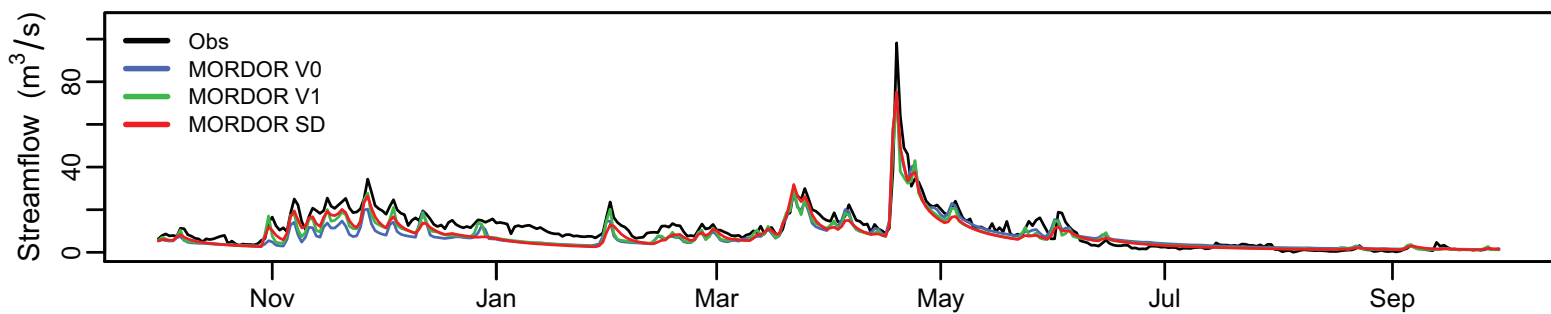

Year 1965

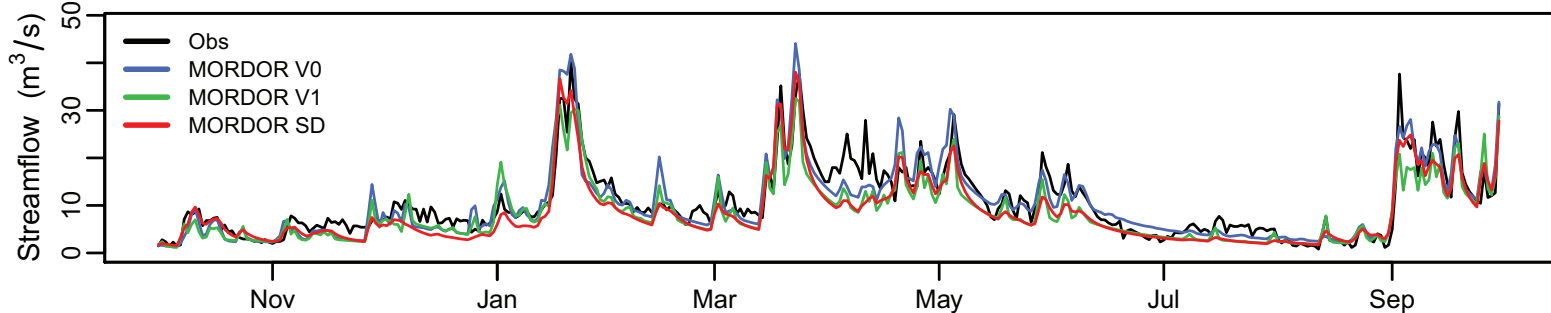

Year 1966

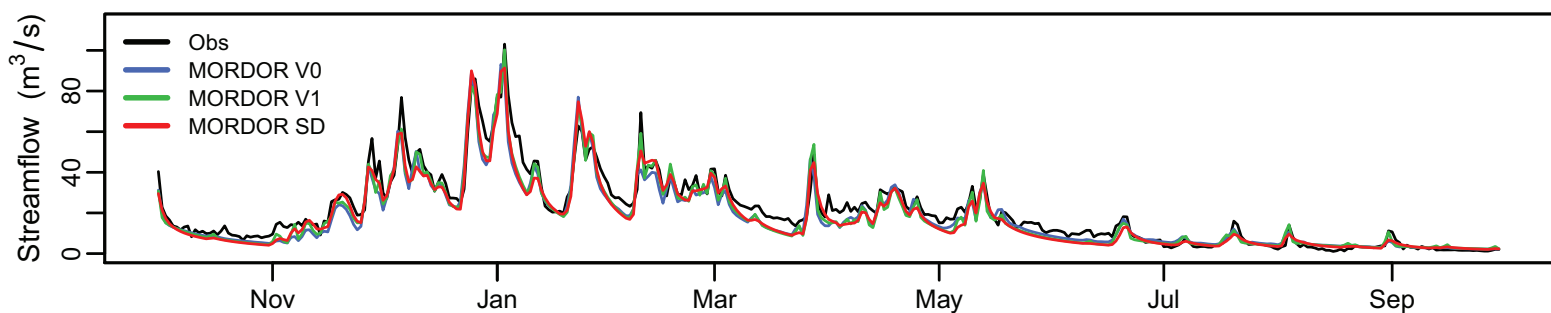

Year 1967

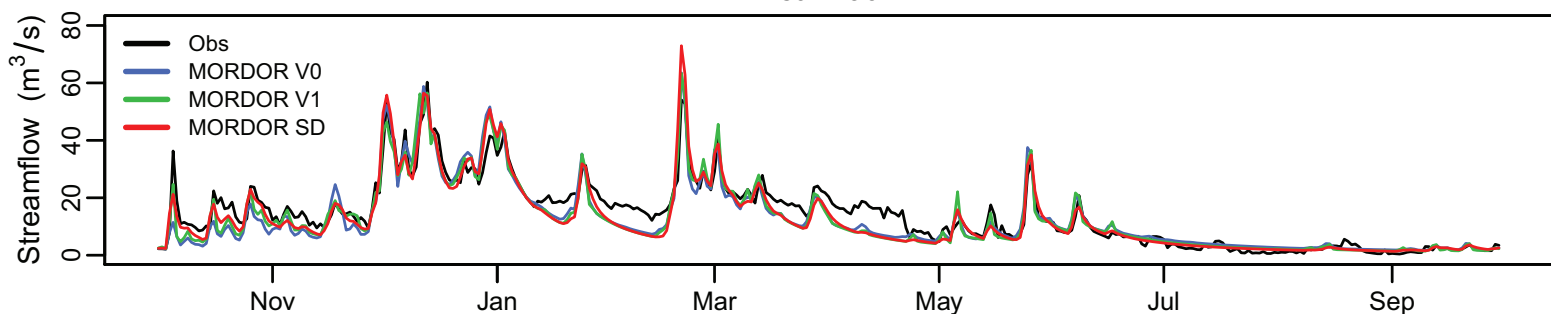

Year 1968

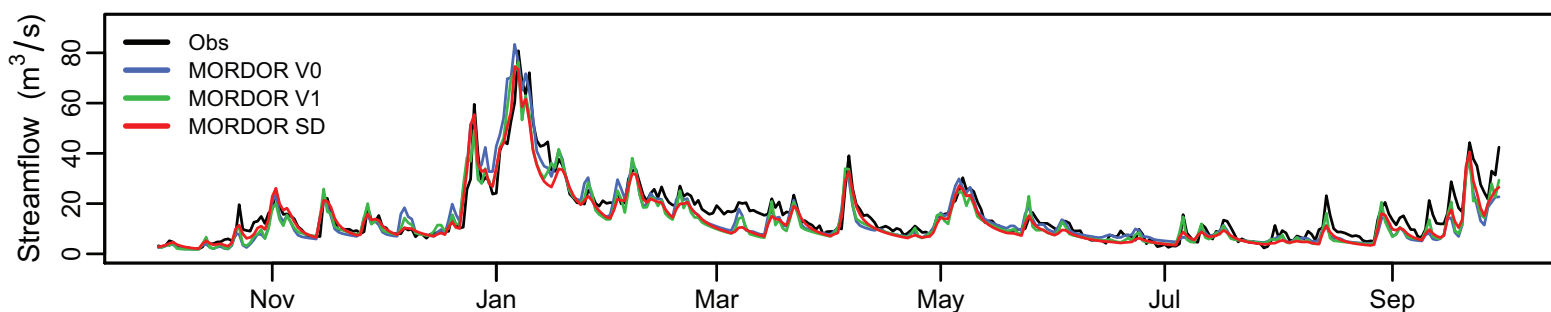

Year 1969

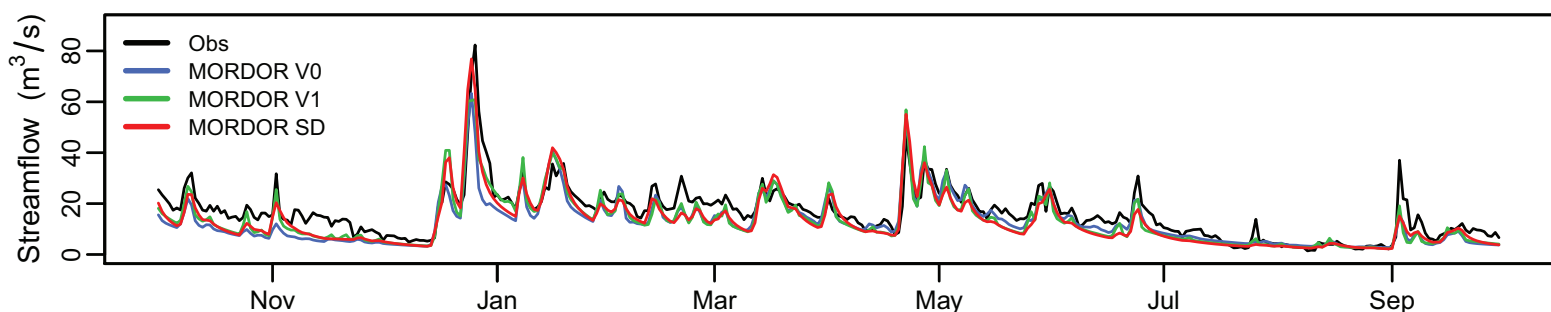

# Taurion@RocheTalamie

Year 1970

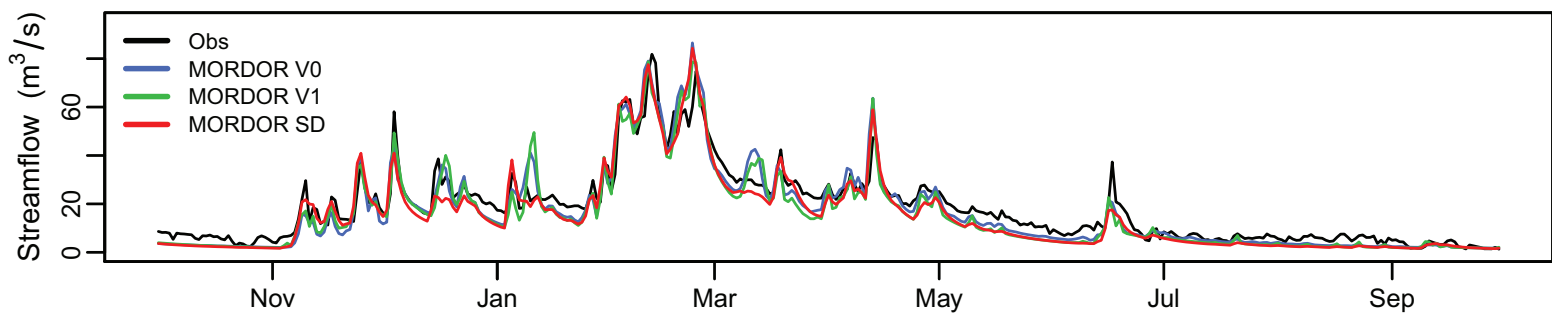

Year 1971

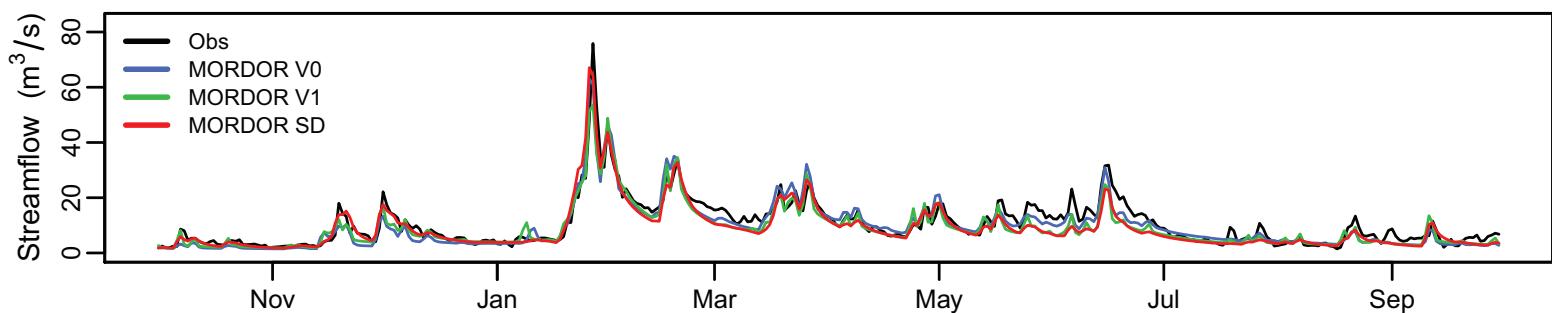

Year 1972

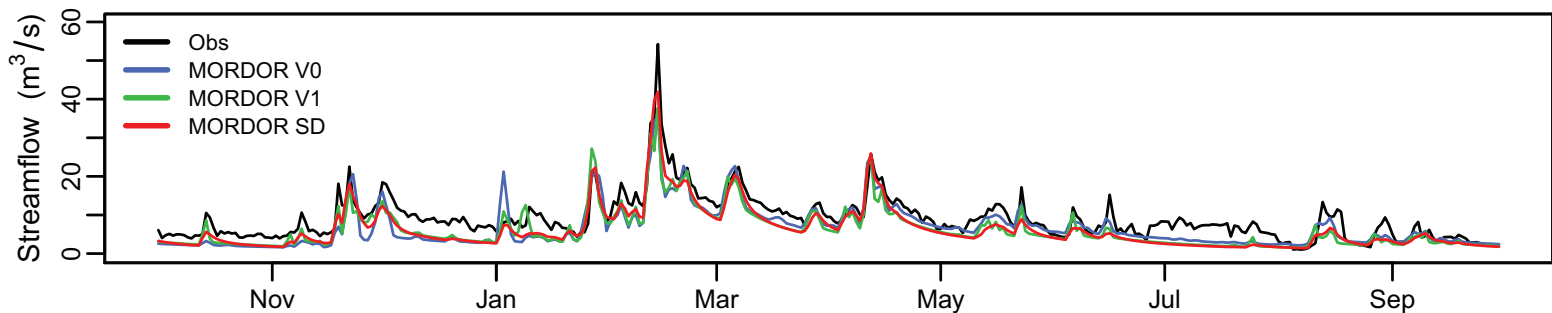

Year 1973

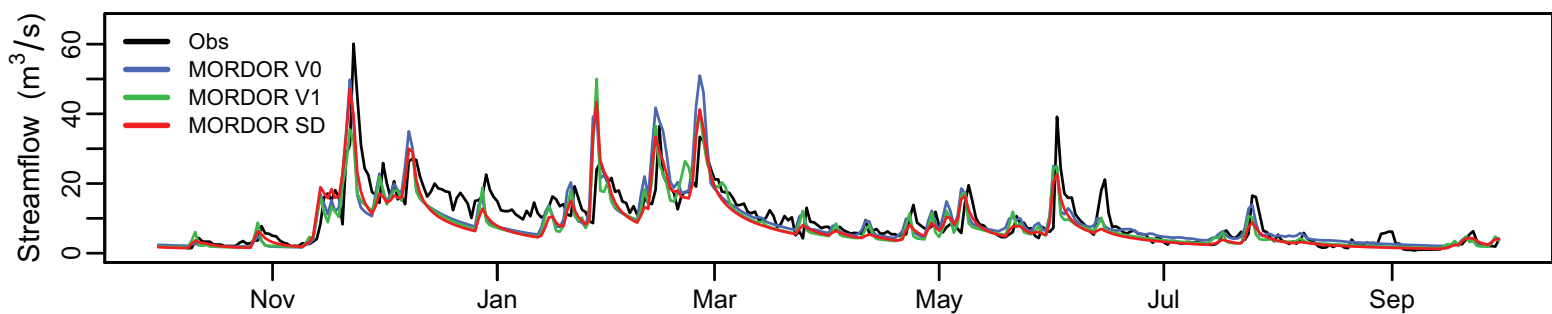

Year 1974

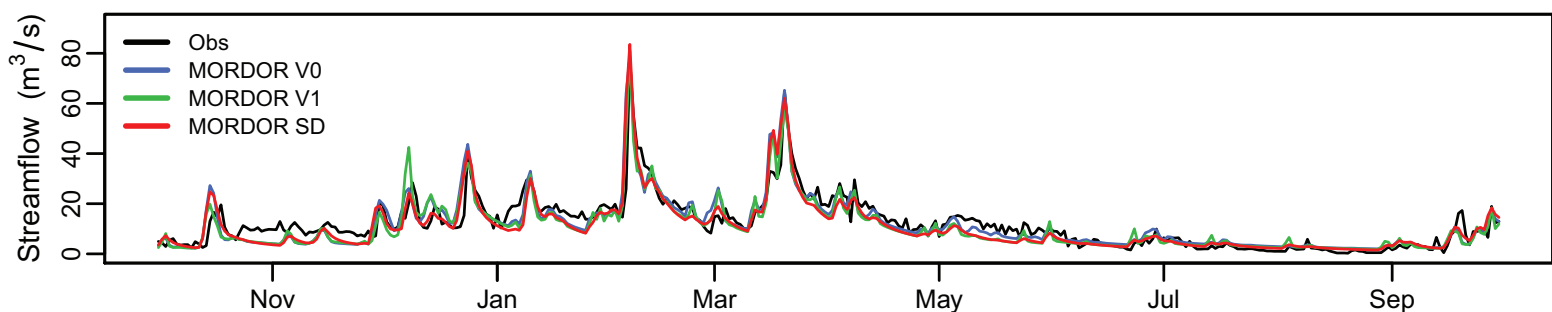

Year 1975

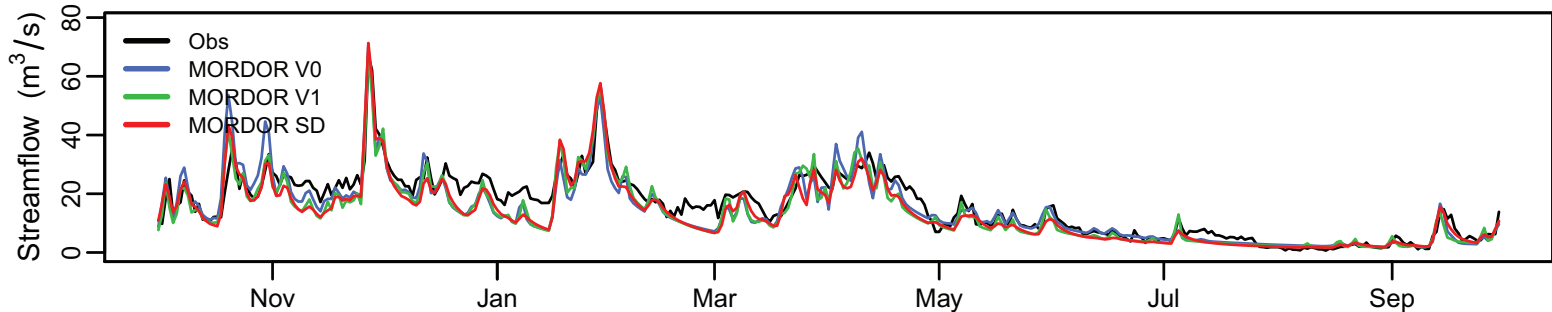

# Taurion@RocheTalamie

Year 1976

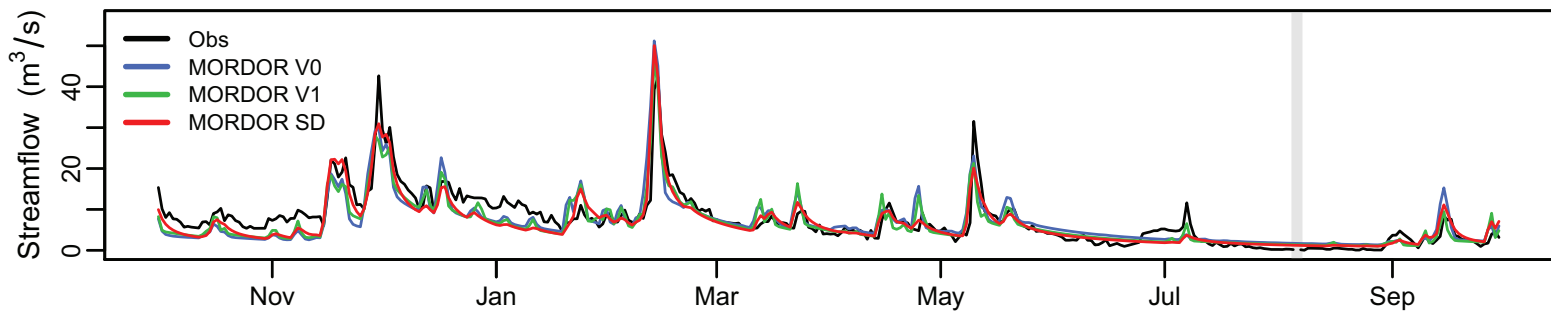

Year 1977

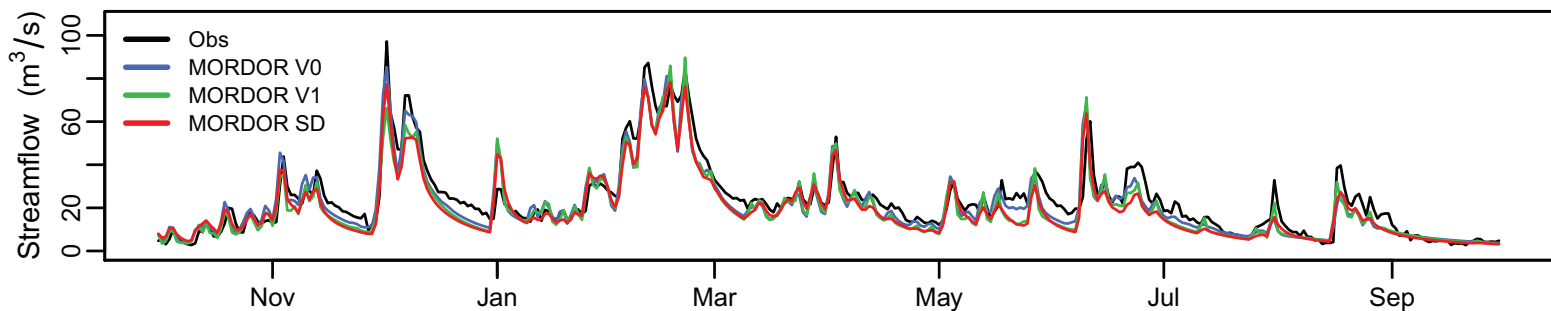

Year 1978

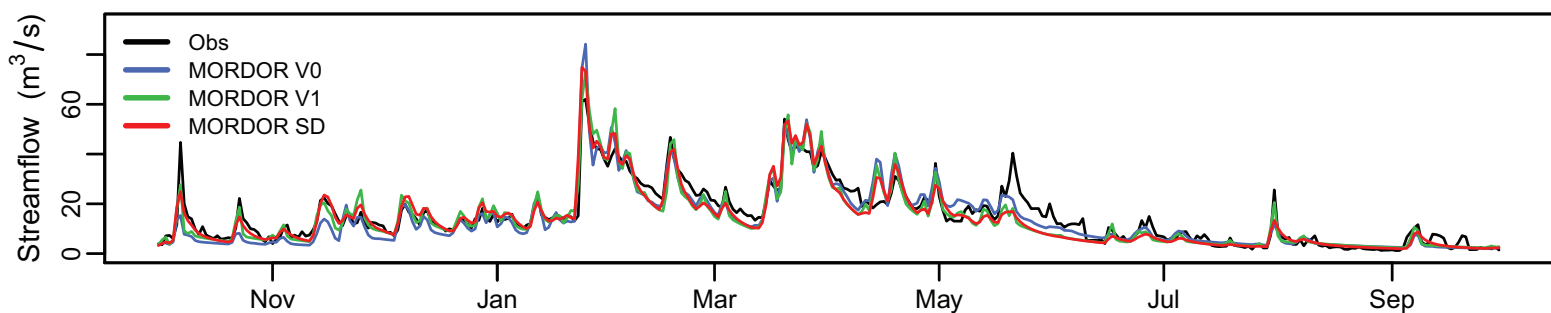

Year 1979

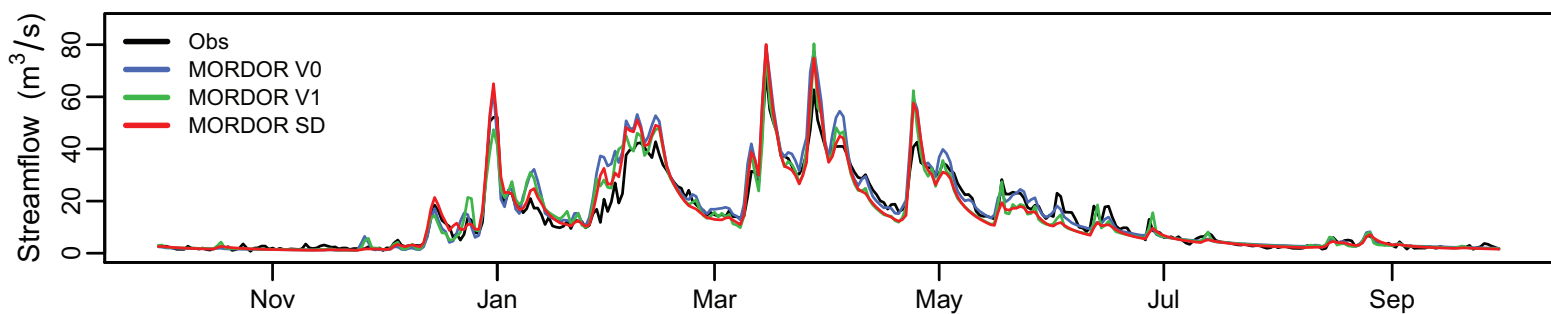

Year 1980

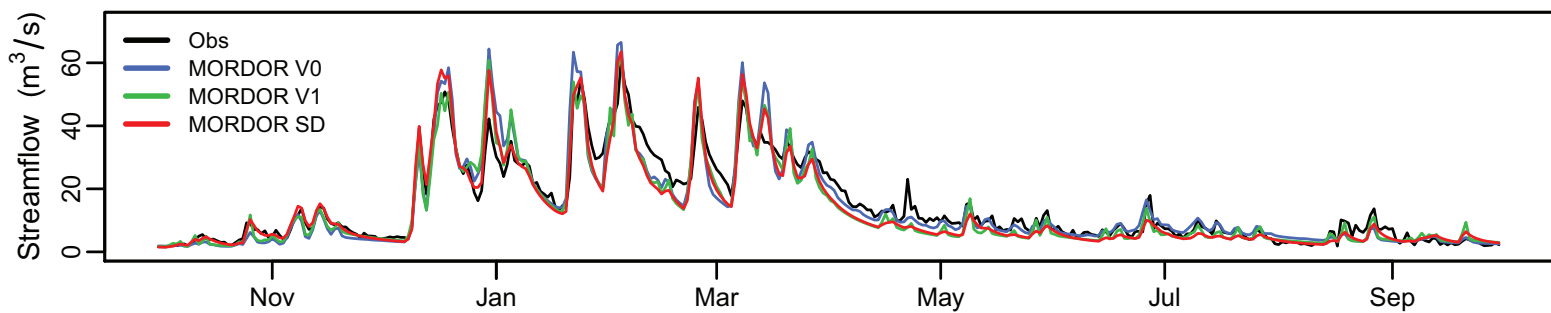

Year 1981

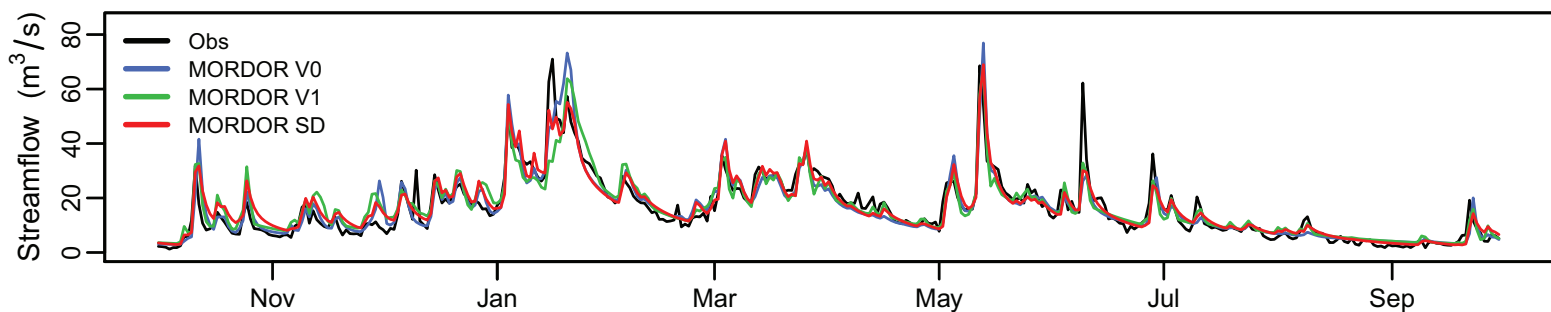

# Taurion@RocheTalamie

Year 1982

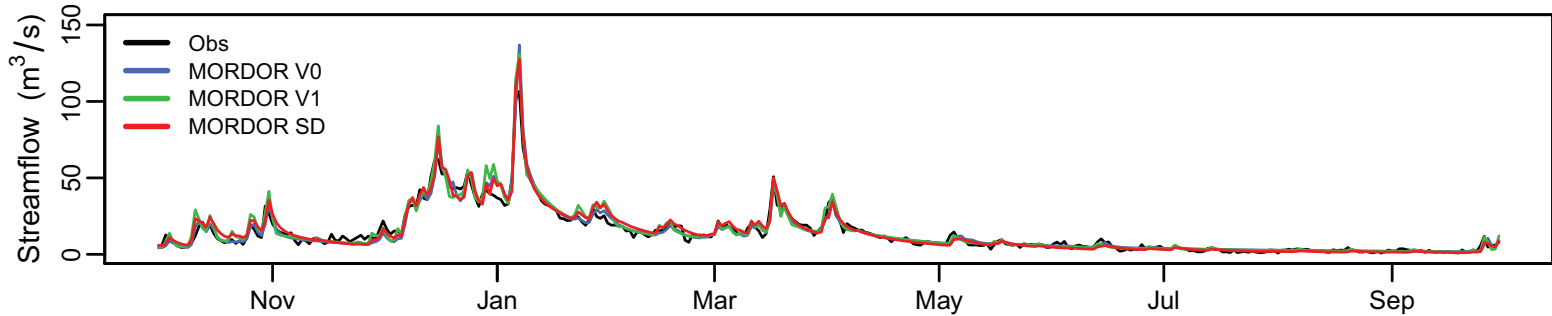

Year 1983

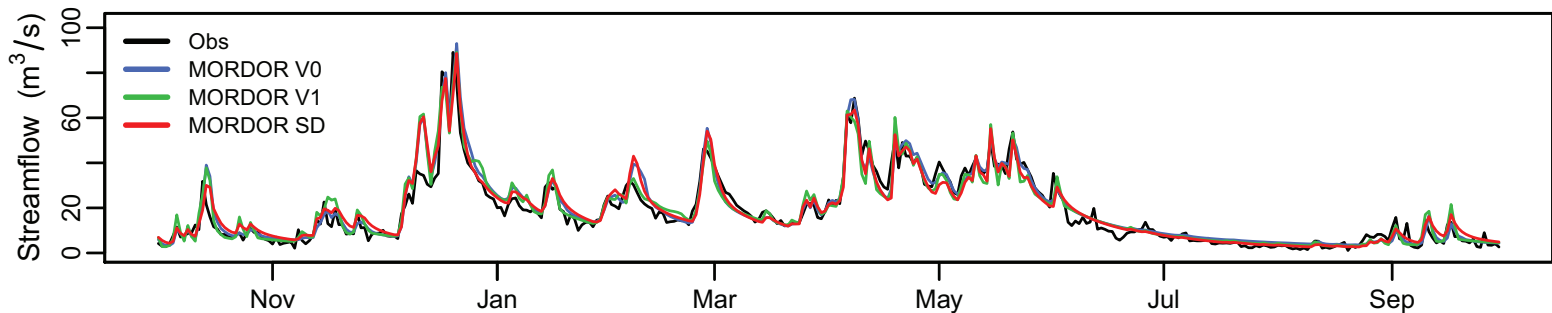

Year 1984

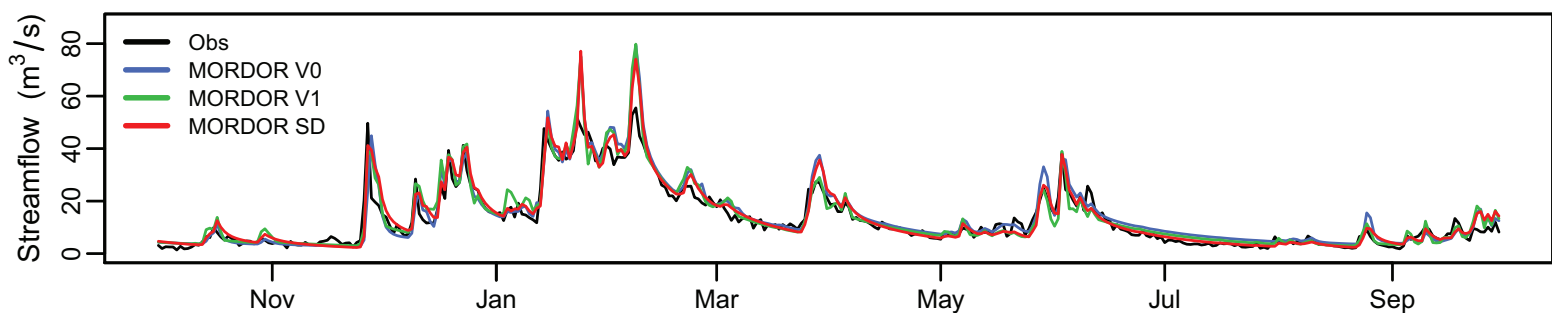

Year 1985

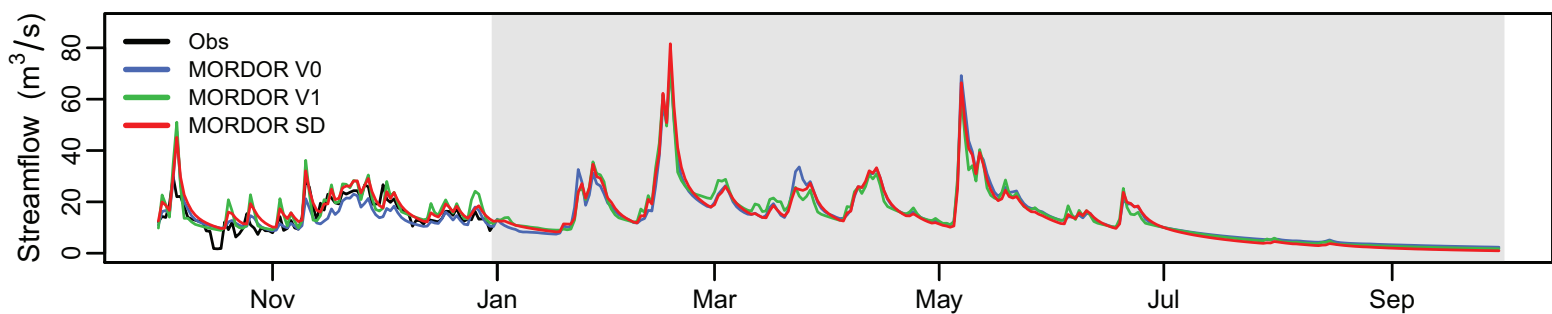

Year 1986

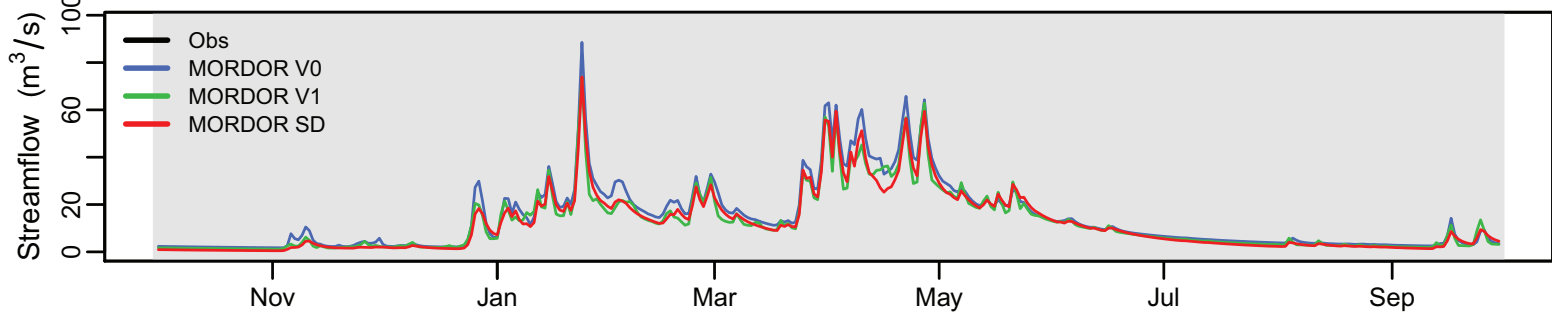

Year 1987

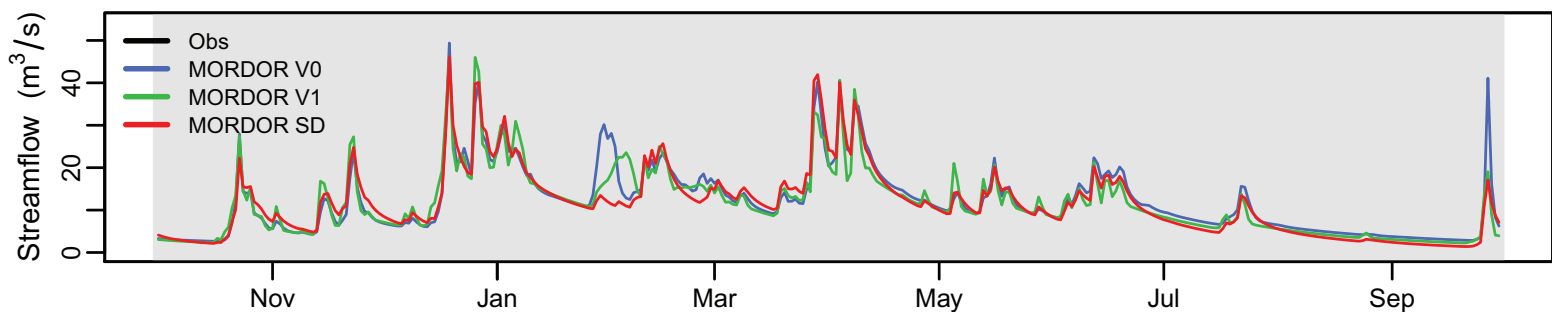



# Taurion@RocheTalamie

Year 1988

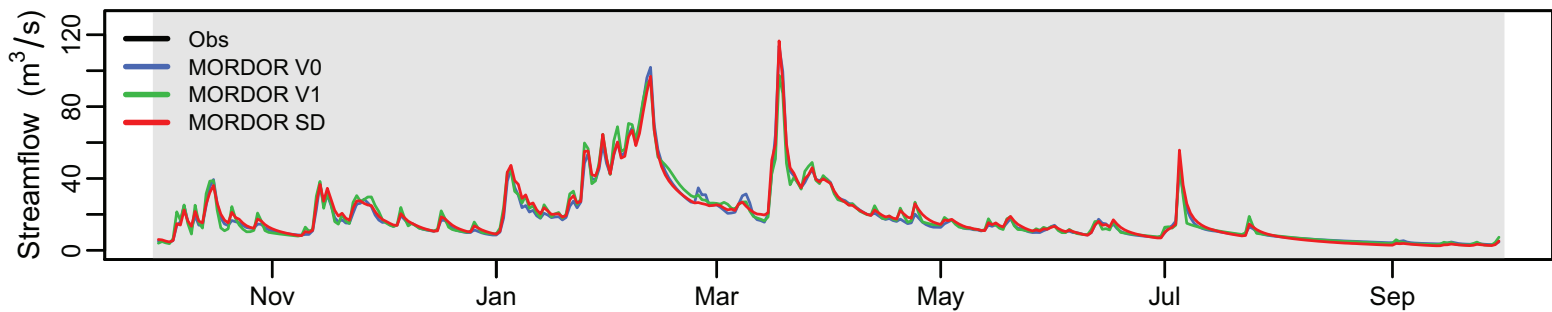

Year 1989

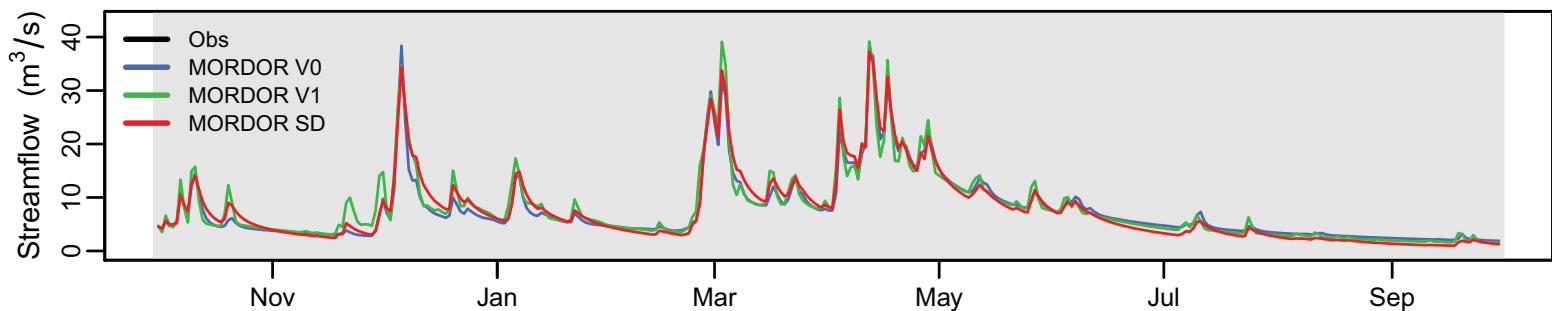

Year 1990

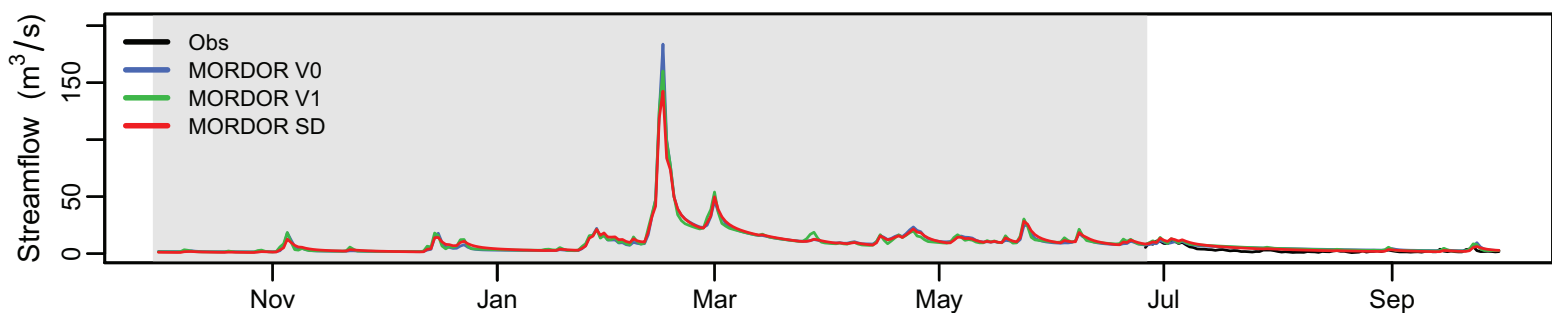

Year 1991

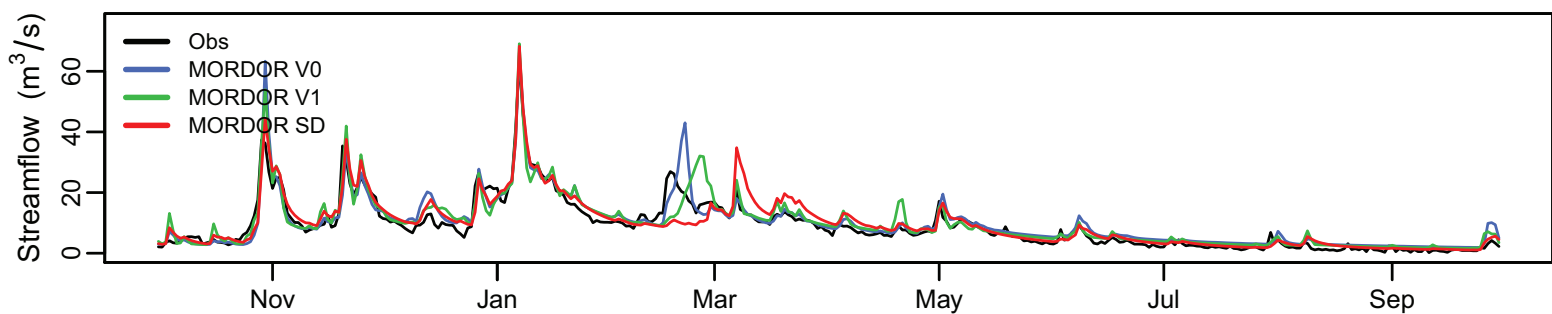

Year 1992

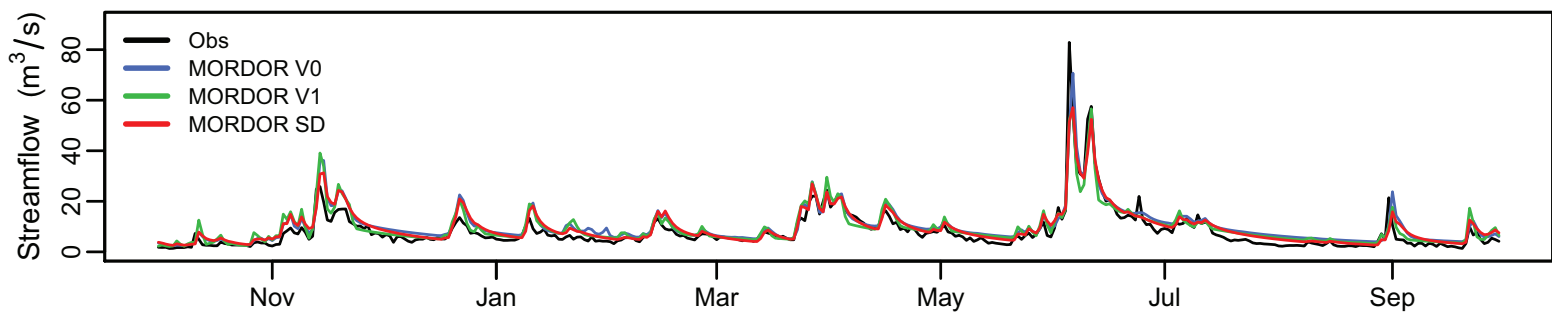

Year 1993

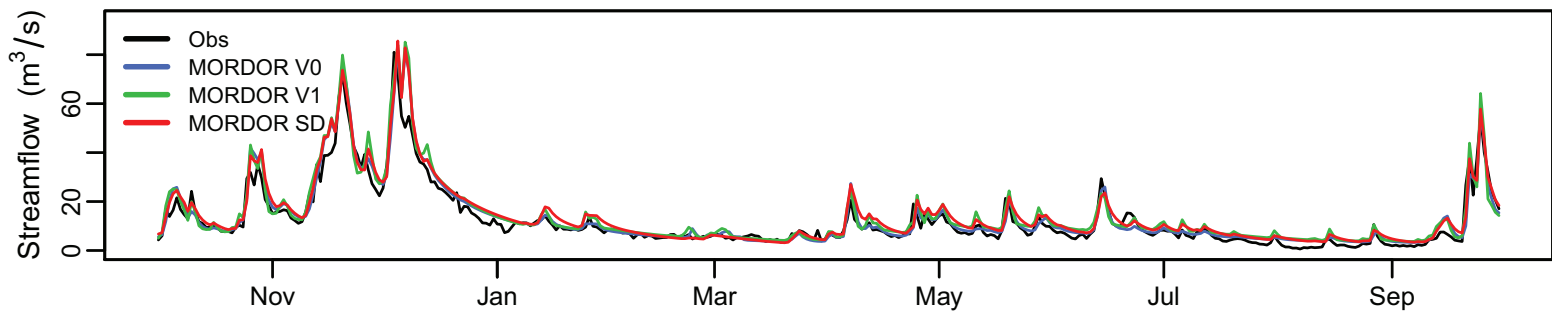

# Taurion@RocheTalamie

Year 1994

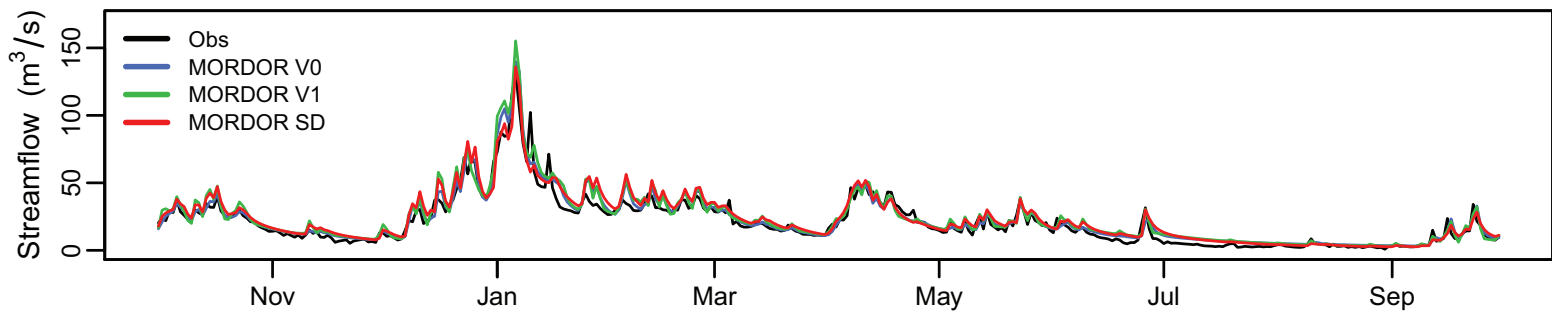

Year 1995

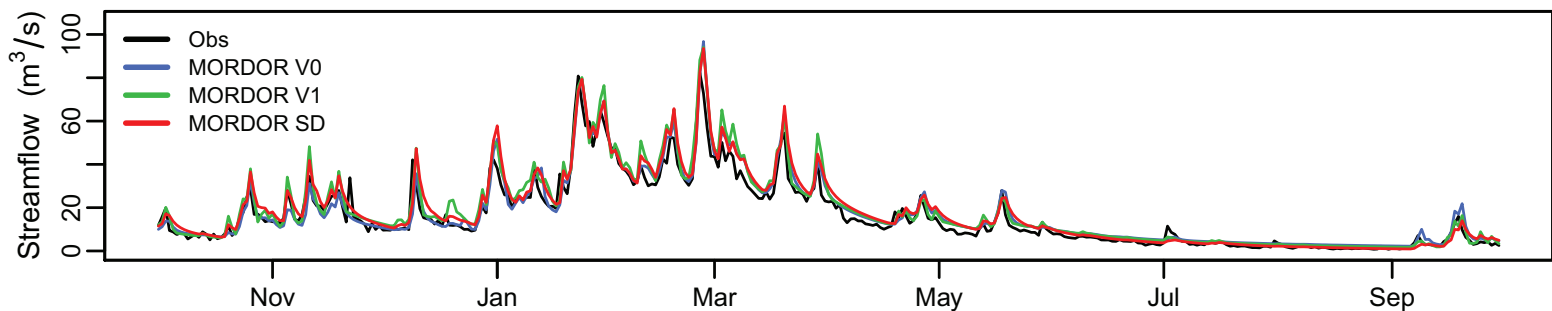

Year 1996

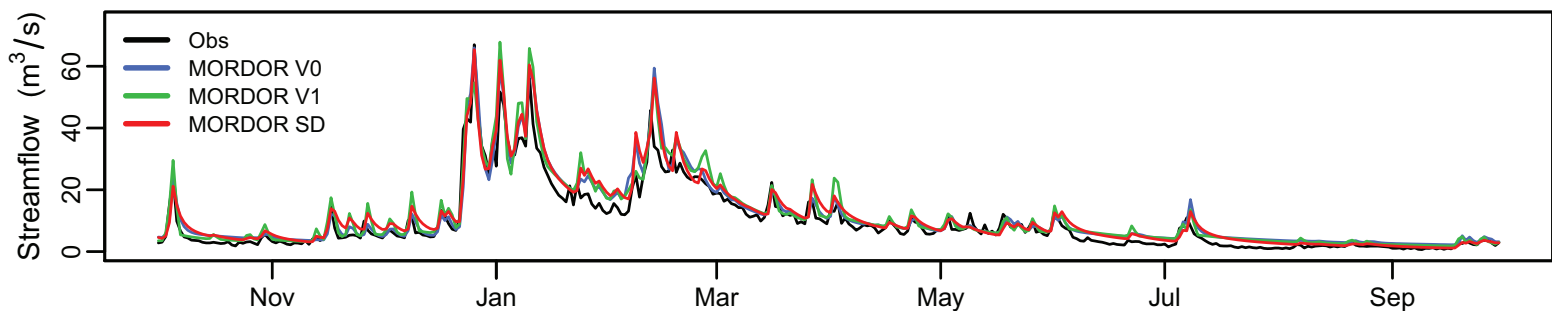

Year 1997

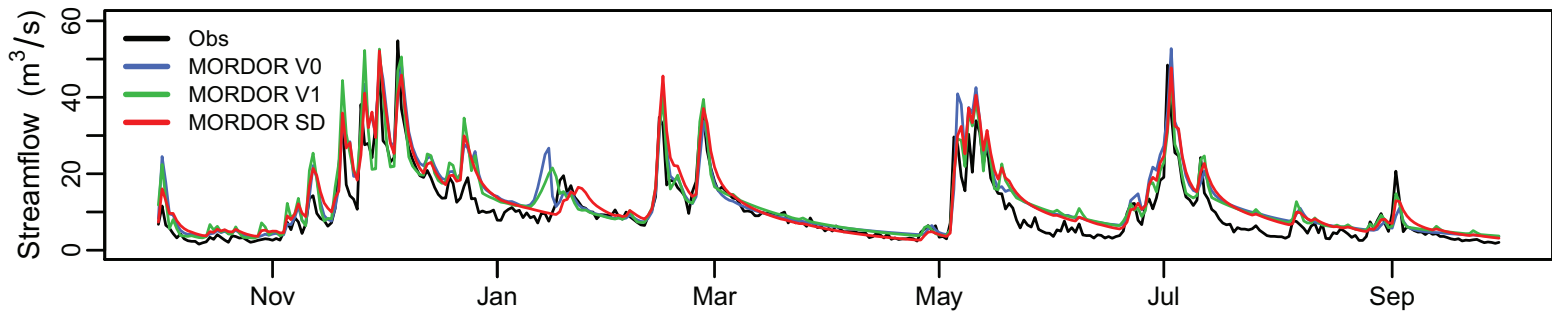

Year 1998

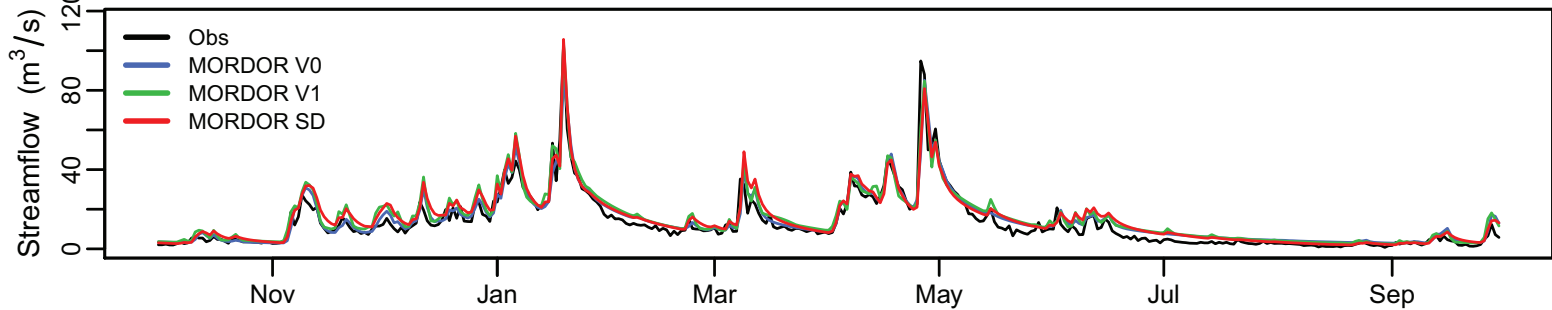

Year 1999

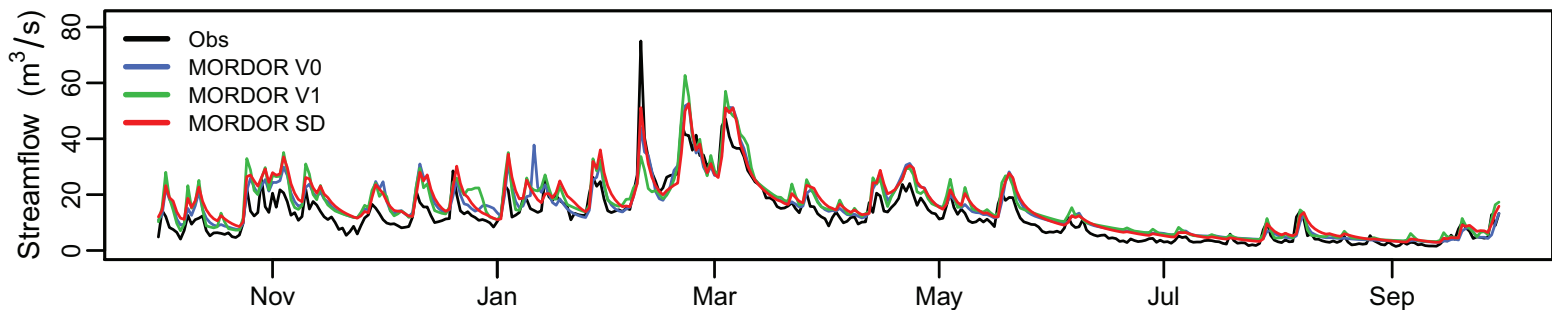

# Taurion@RocheTalamie

Year 2000

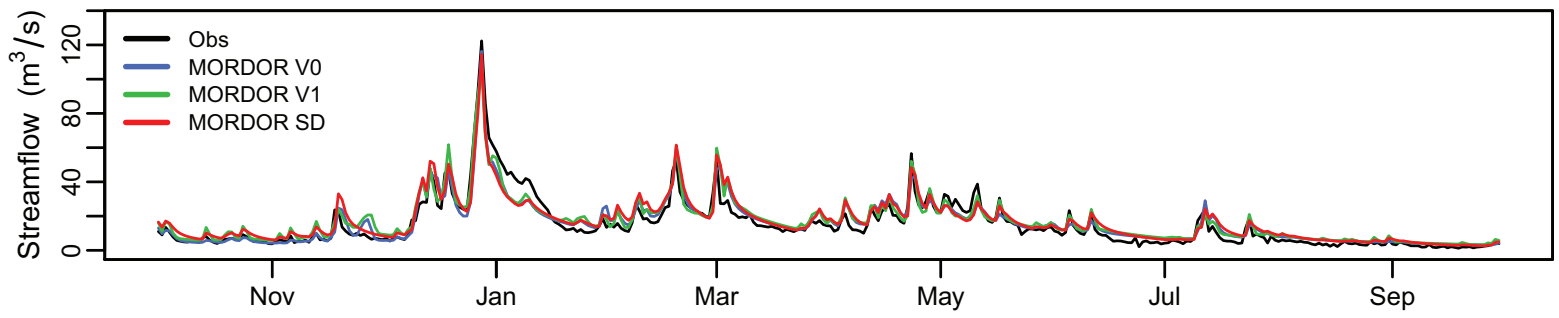

Year 2001

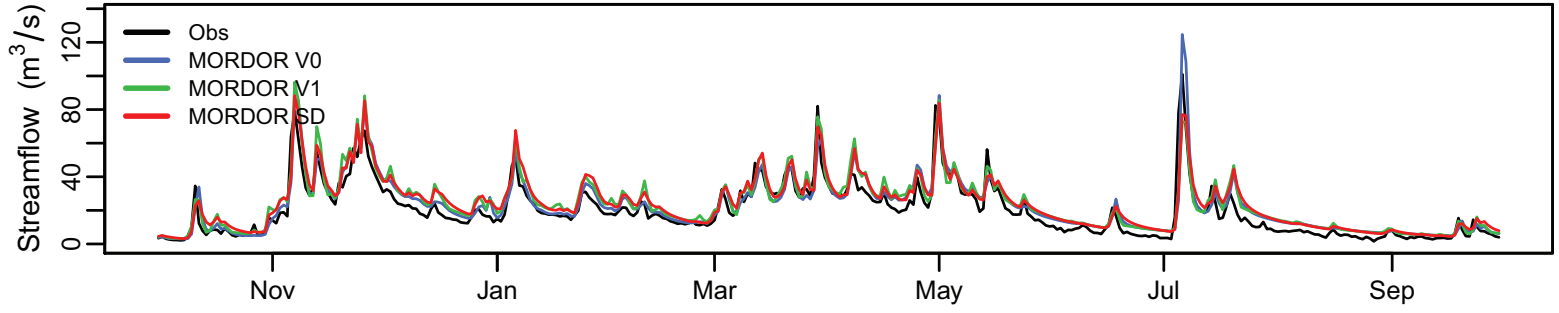

Year 2002

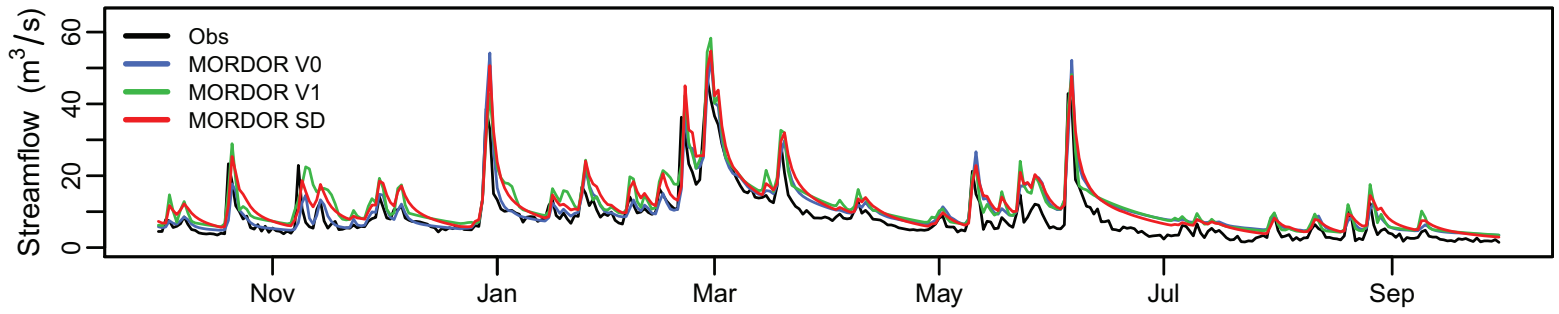

# Tech@Reynes

Year 1972

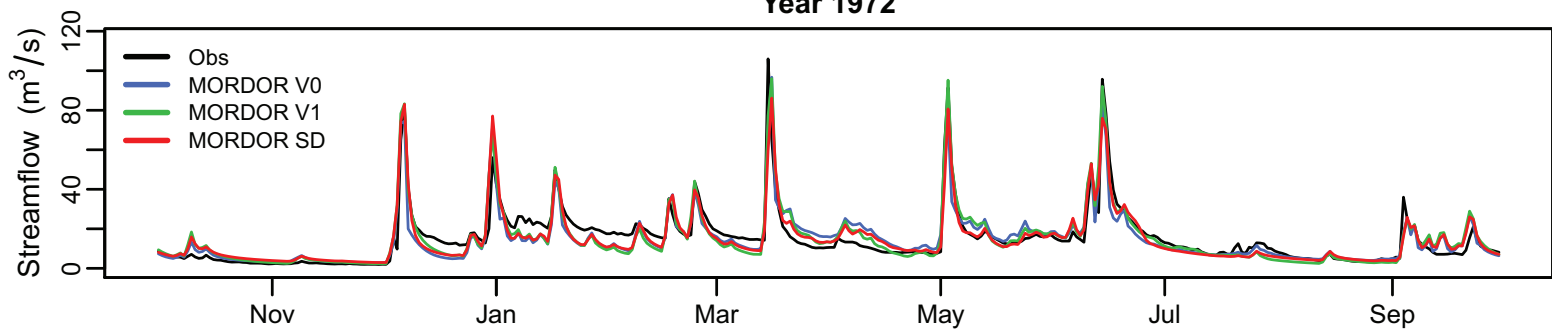

Year 1973

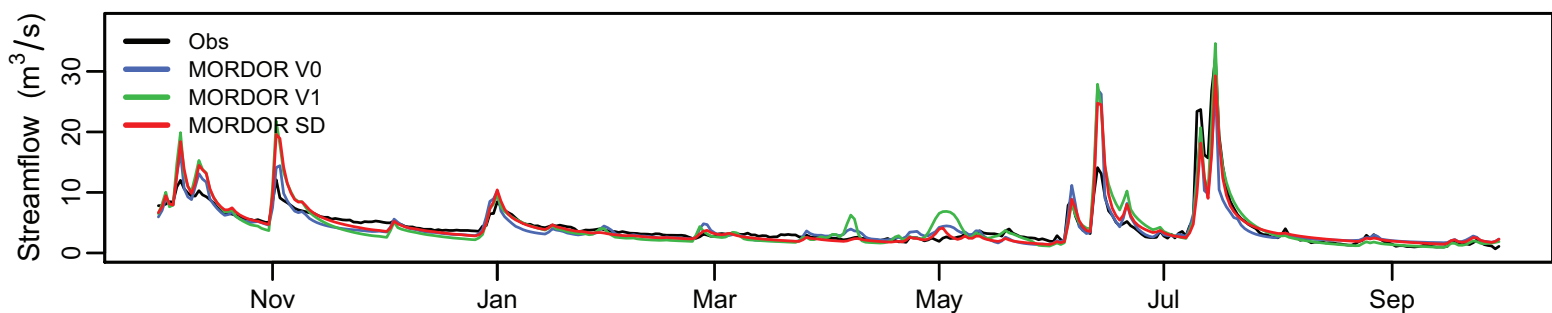

Year 1974

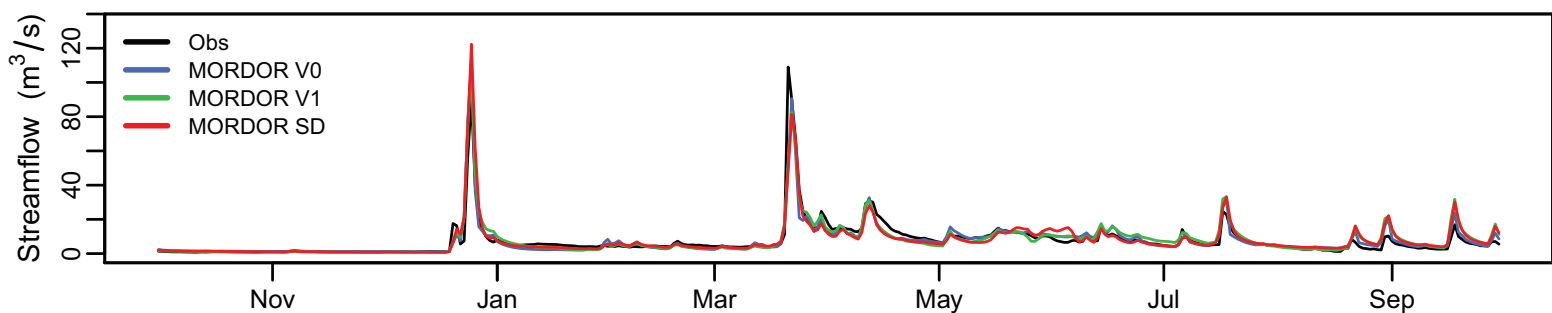

Year 1975

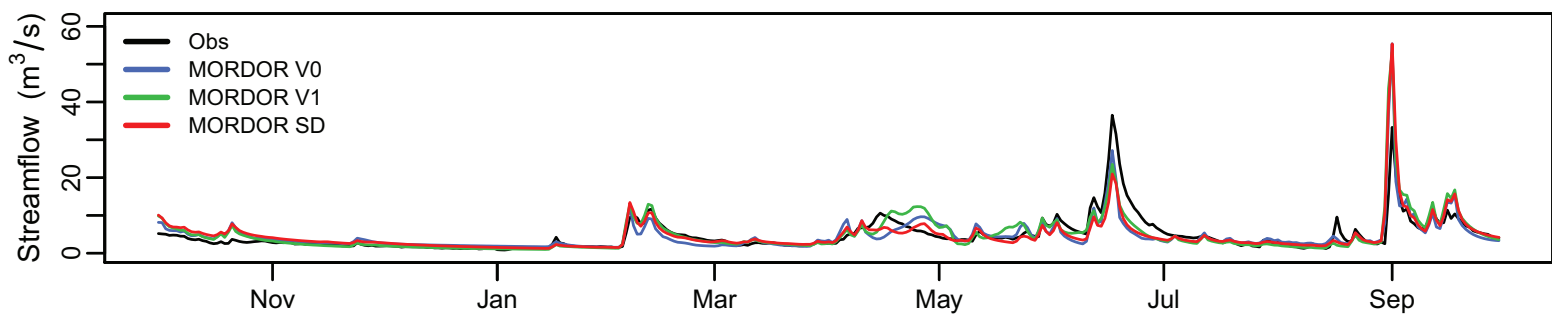

Year 1976

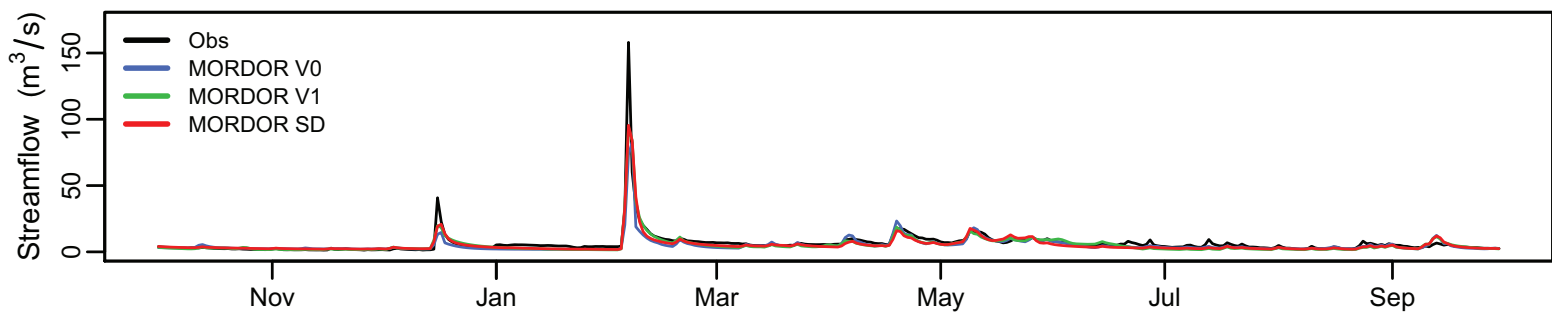

Year 1977

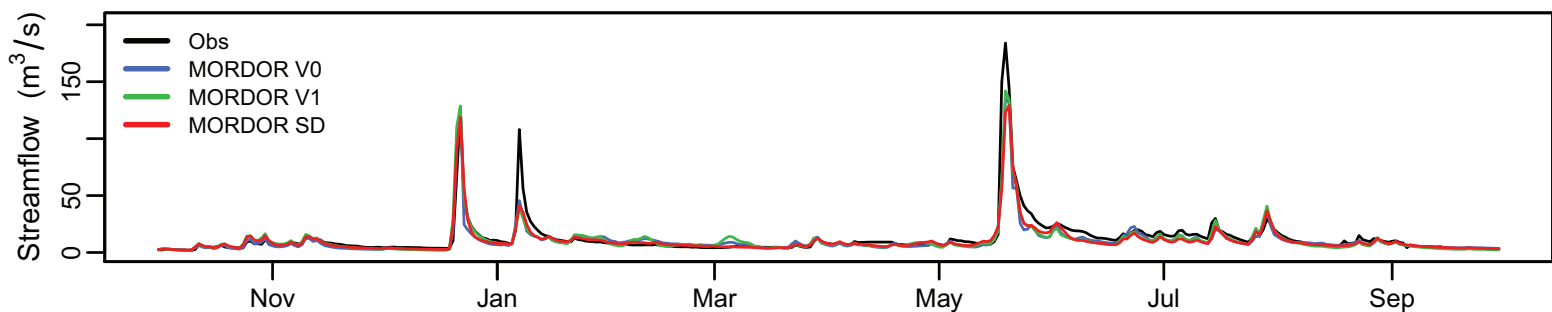

# Tech@Reynes

Year 1978

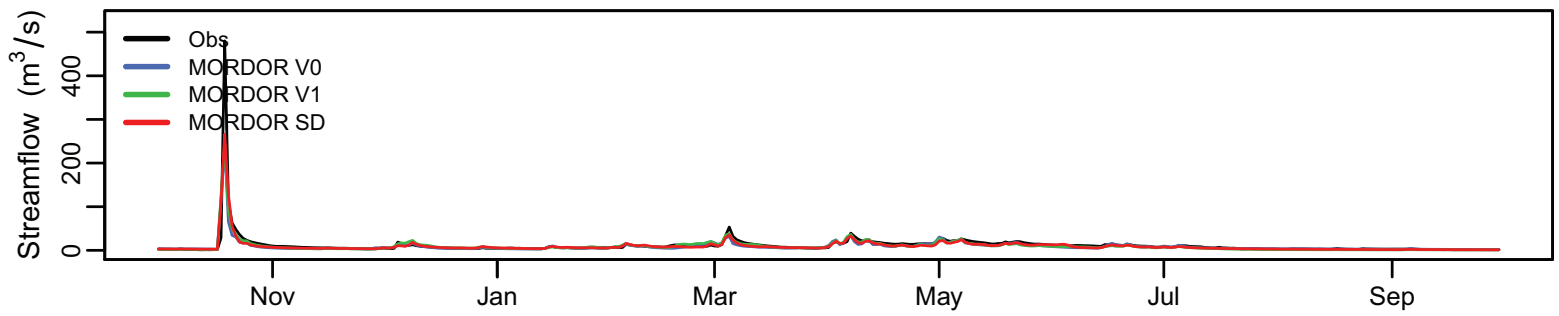

Year 1979

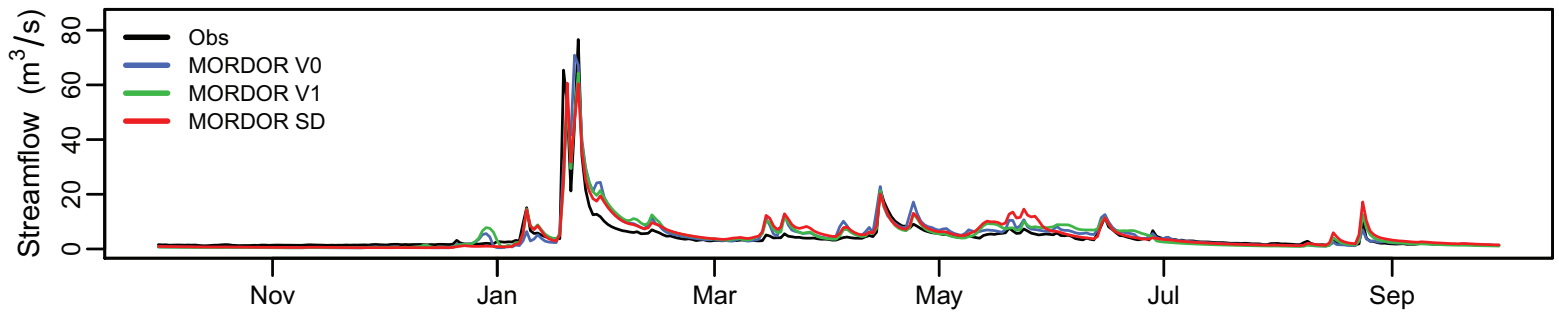

Year 1980

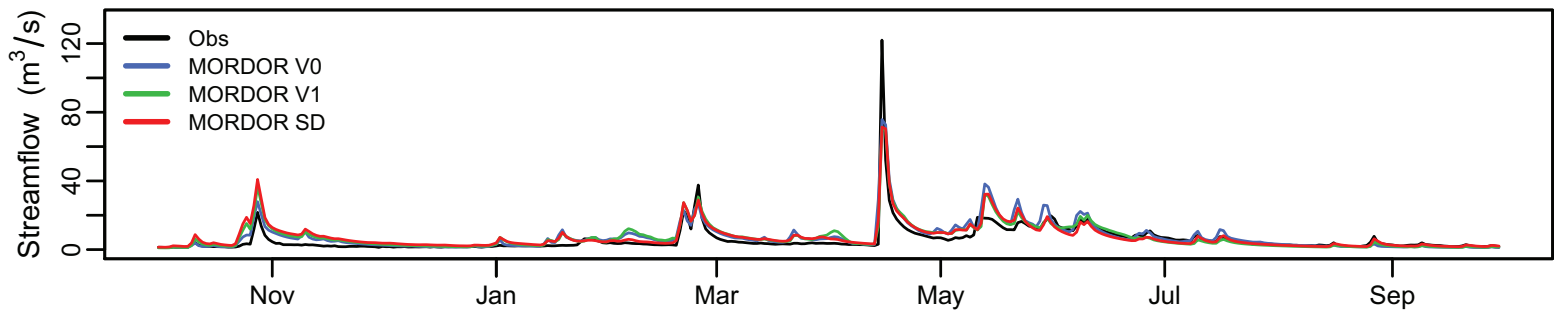

Year 1981

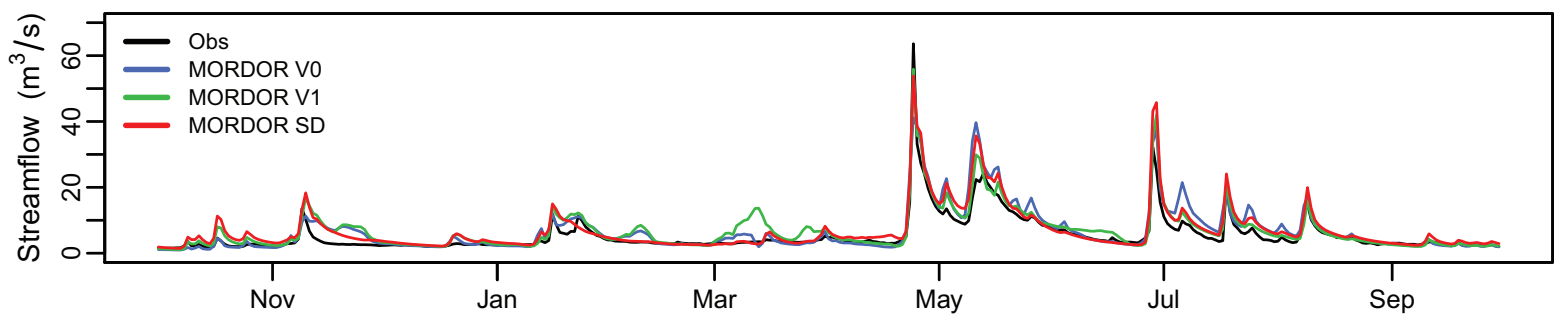

Year 1982

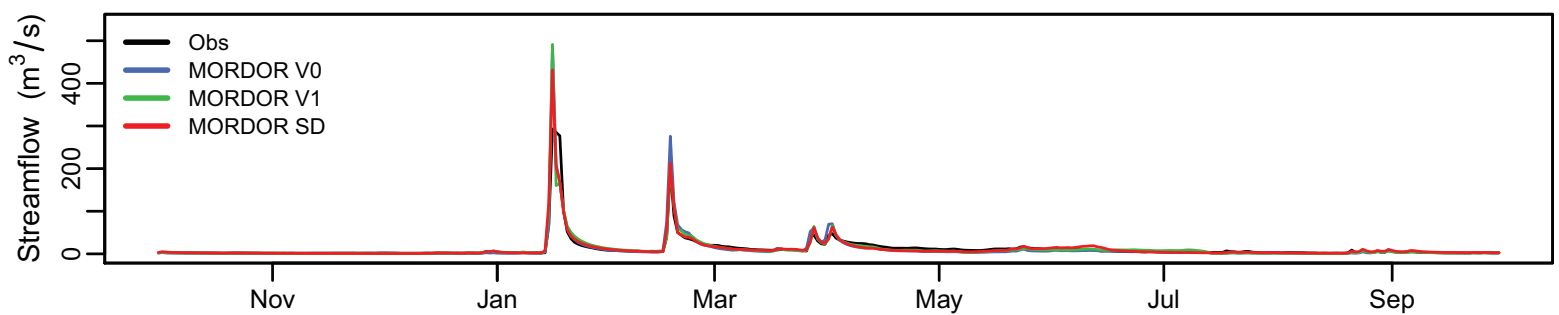

Year 1983

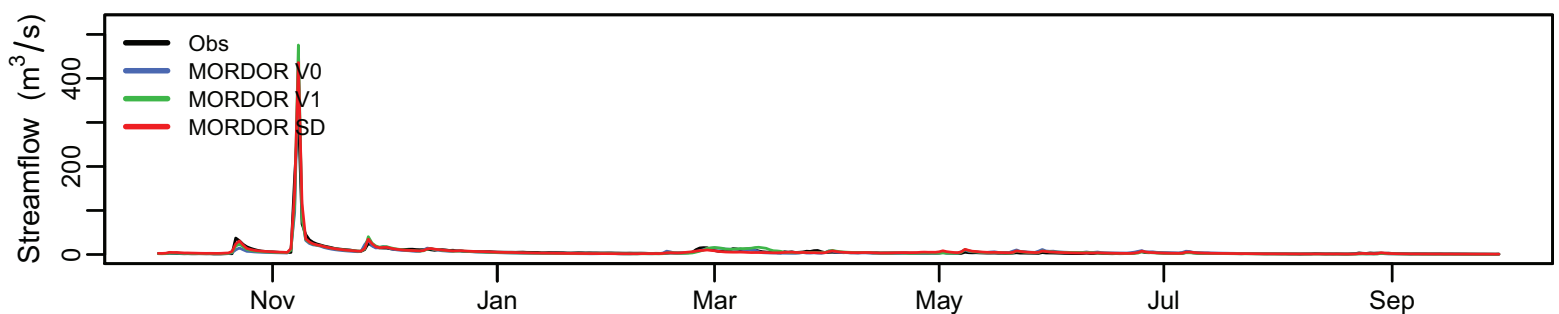

# Tech@Reynes

Year 1984

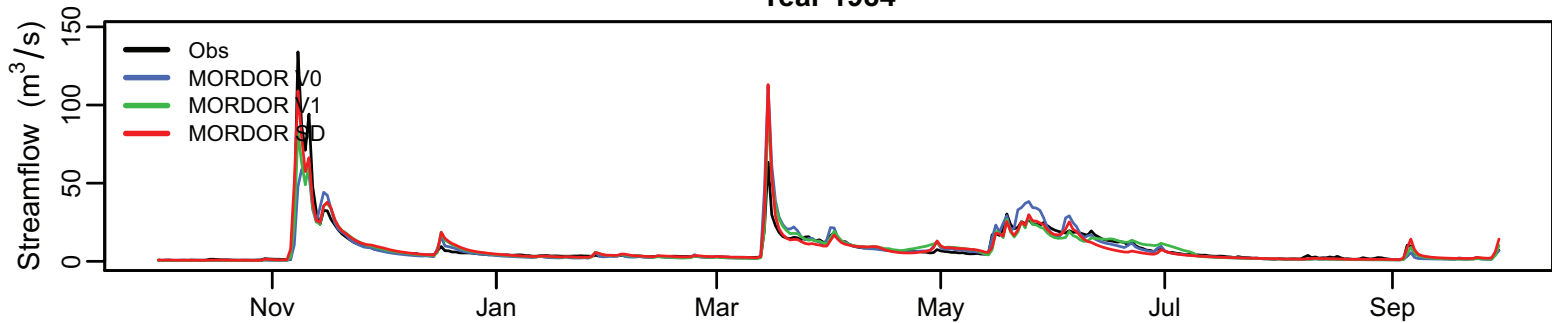

Year 1985

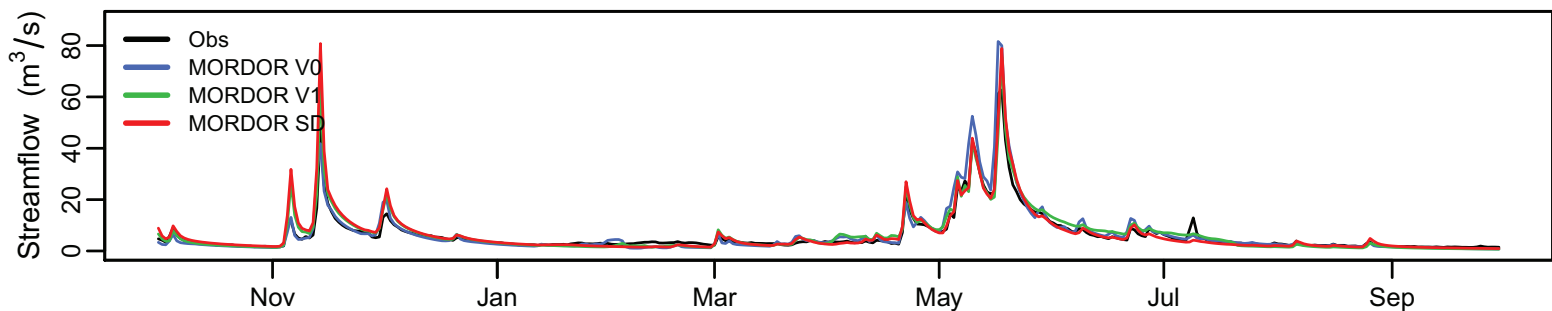

# Tet@Vinca

Year 1983

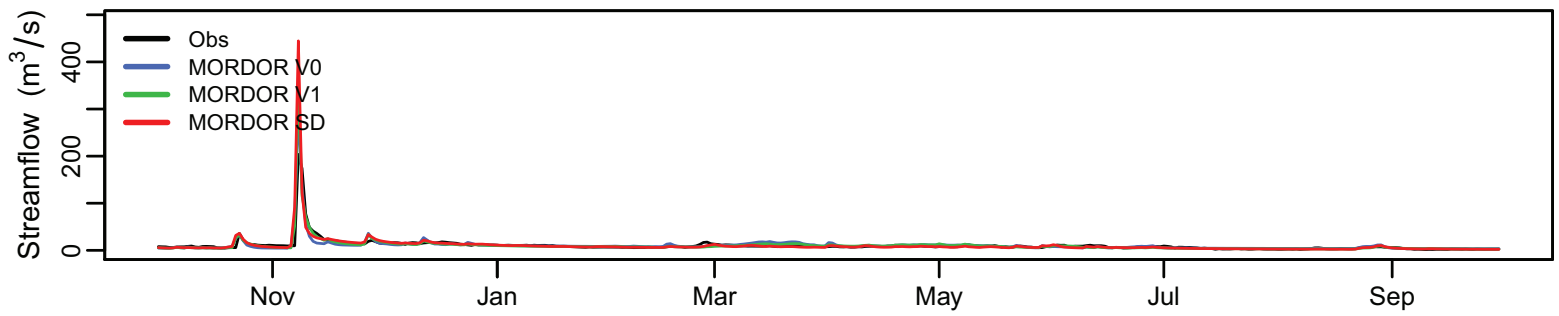

Year 1984

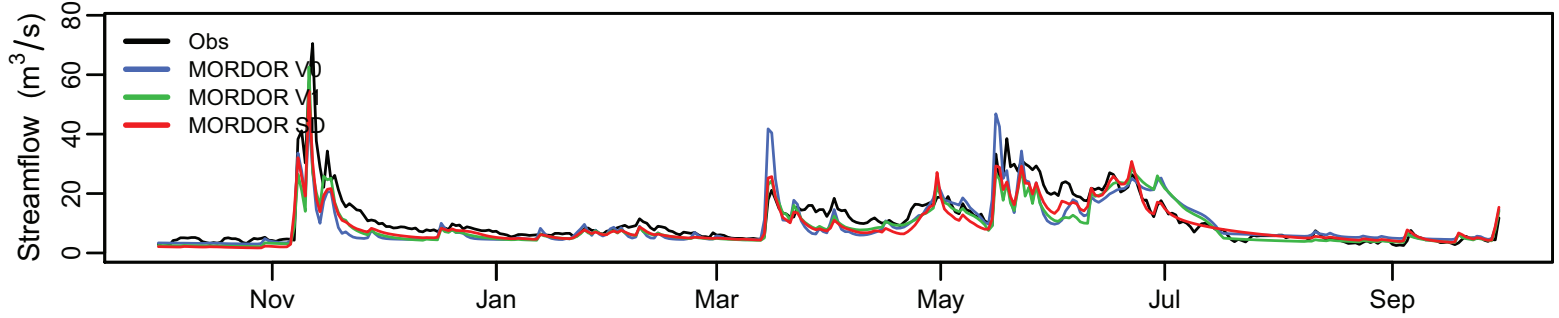

Year 1985

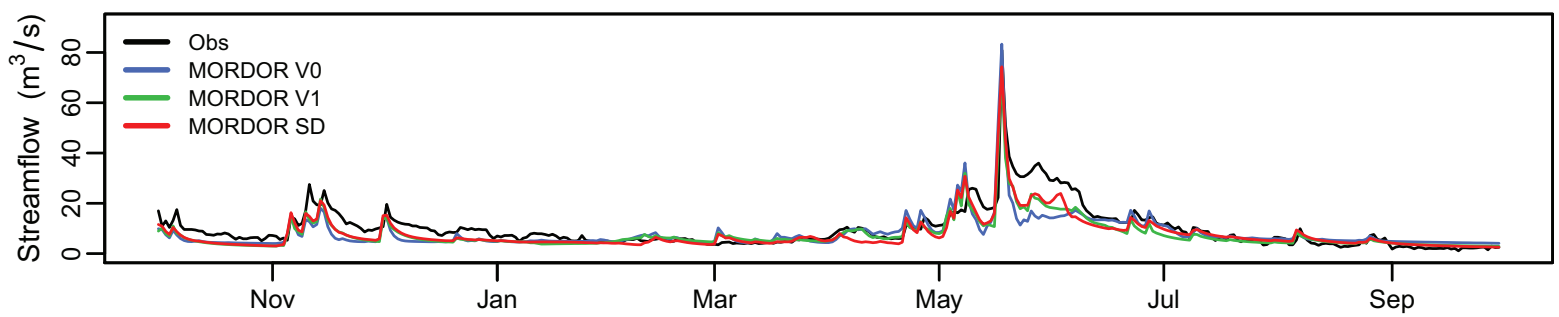

Year 1986

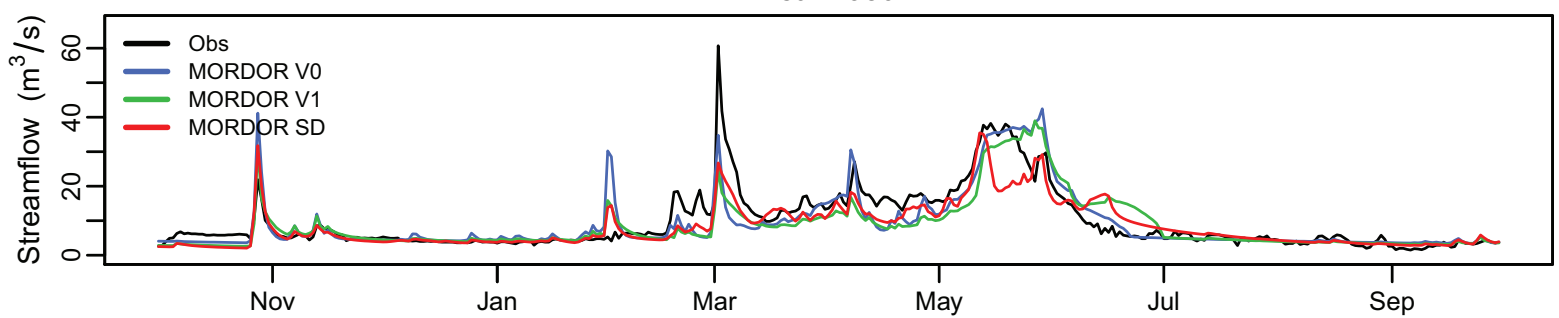

Year 1987

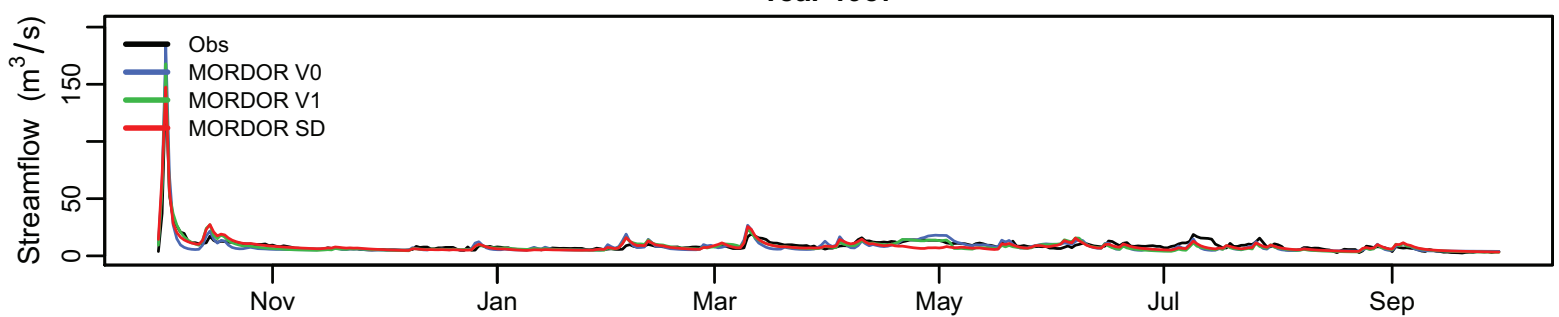

Year 1988

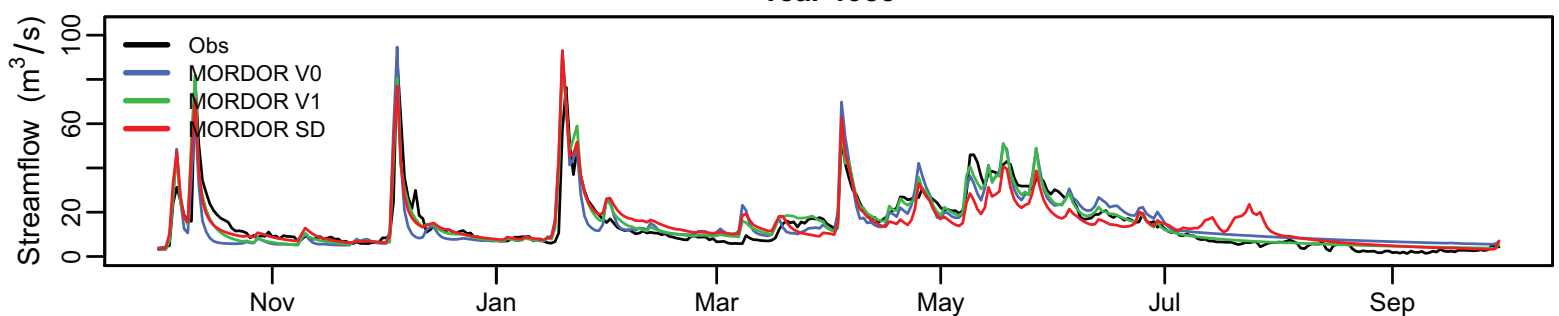

# Tet@Vinca

Year 1989

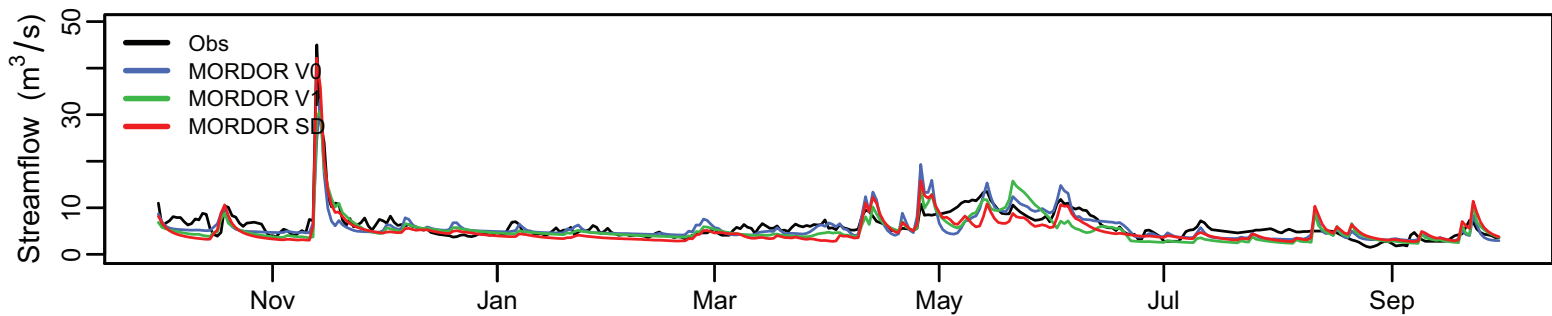

Year 1990

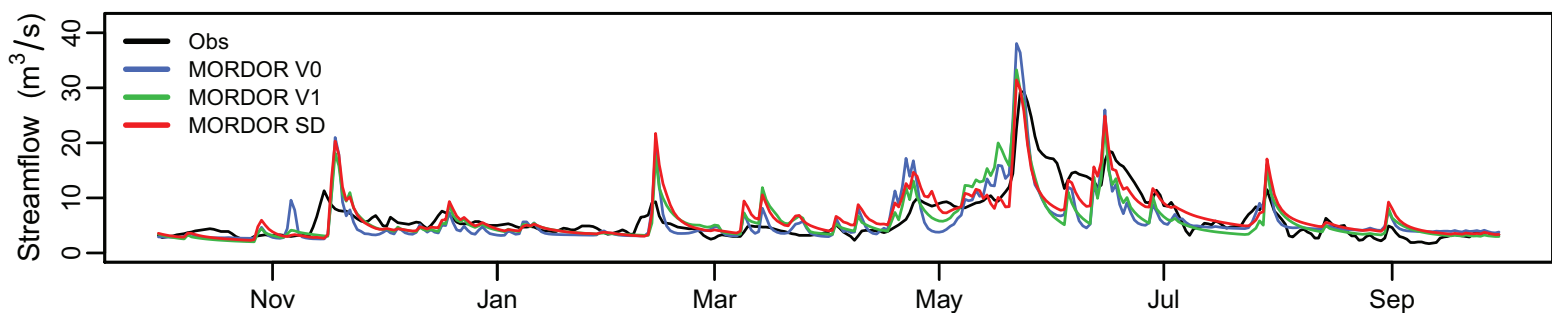

Year 1991

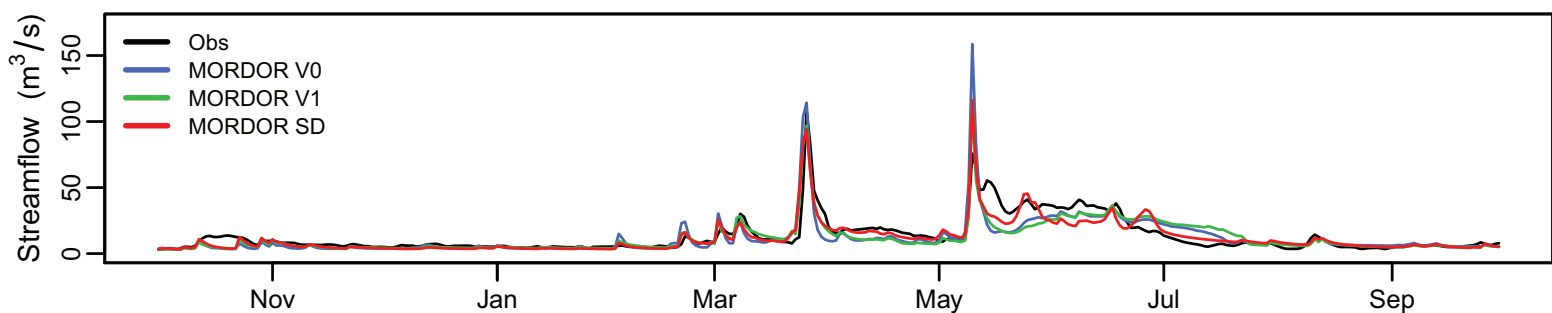

Year 1992

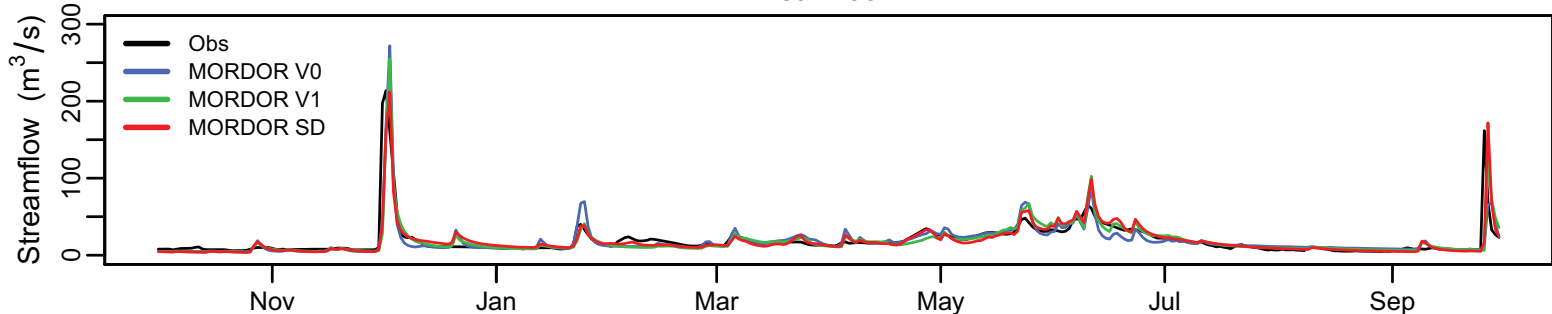

Year 1993

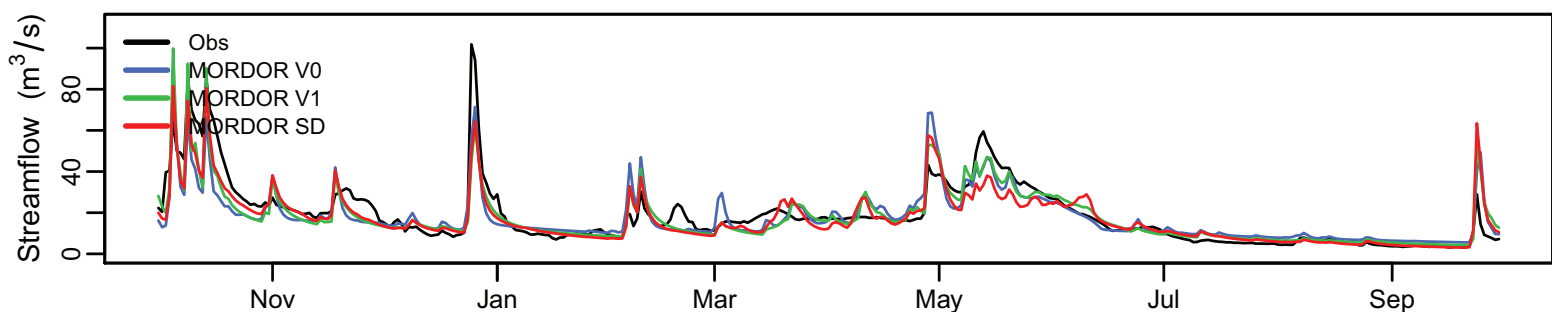

Year 1994

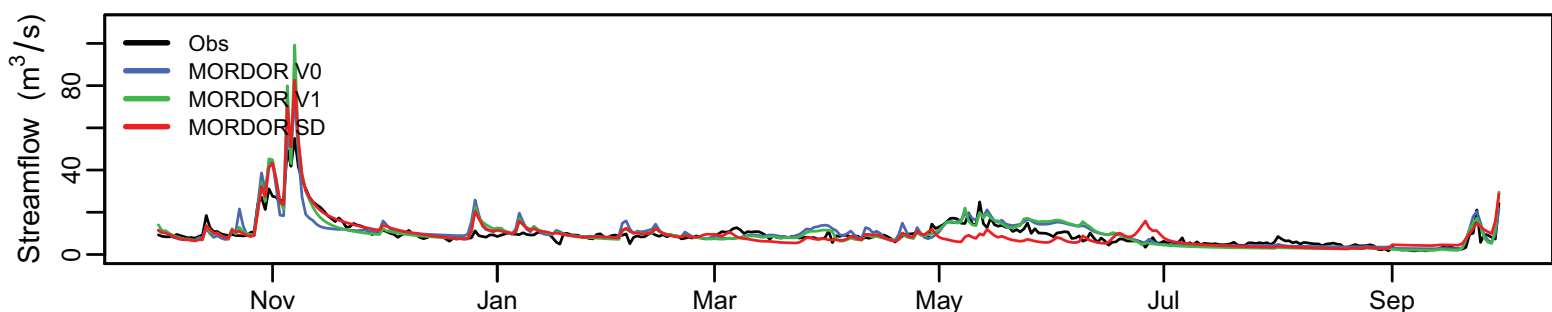



# Tet@Vinca

Year 1995

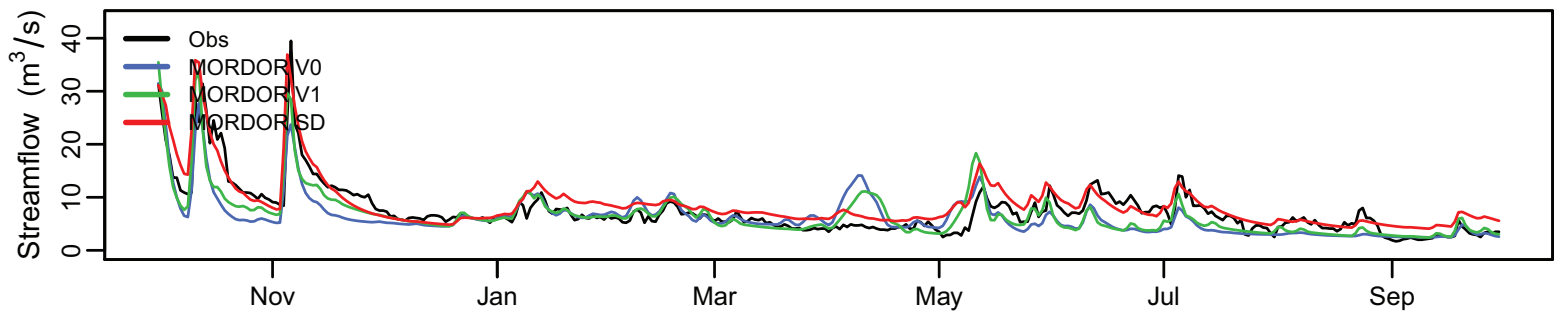

## Year 1996

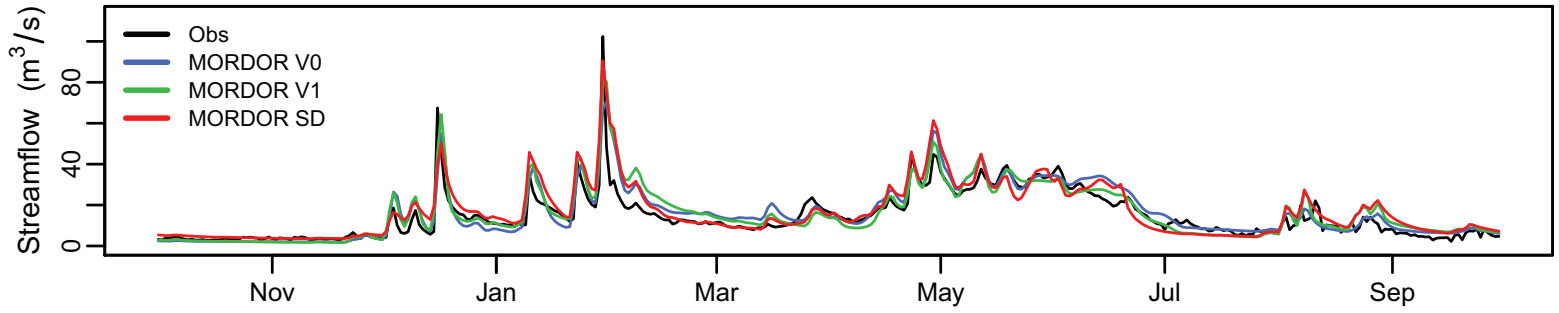

## Year 1997

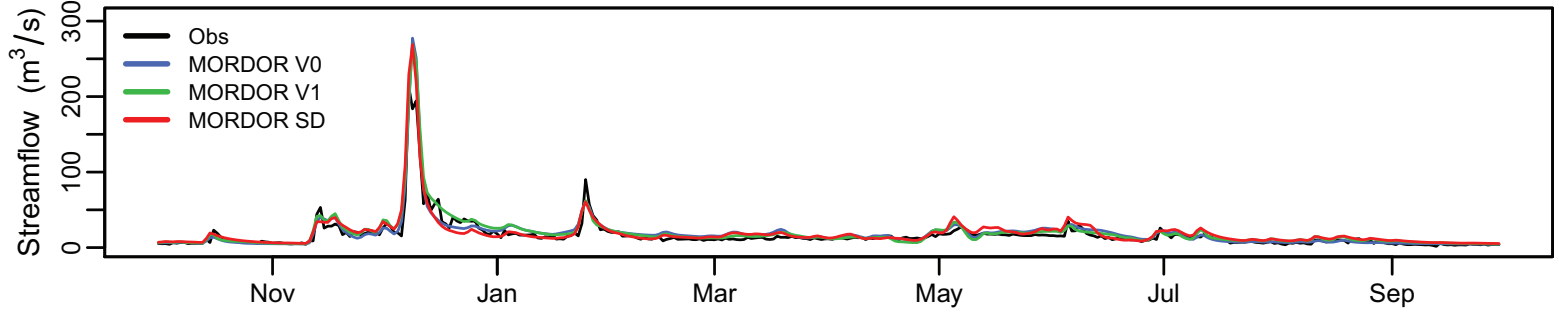

## Year 1998

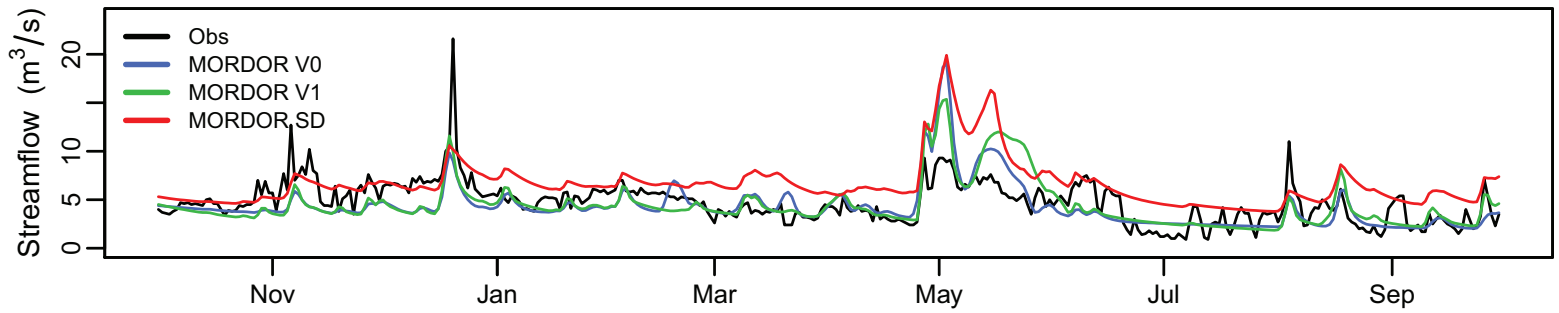

## Year 1999

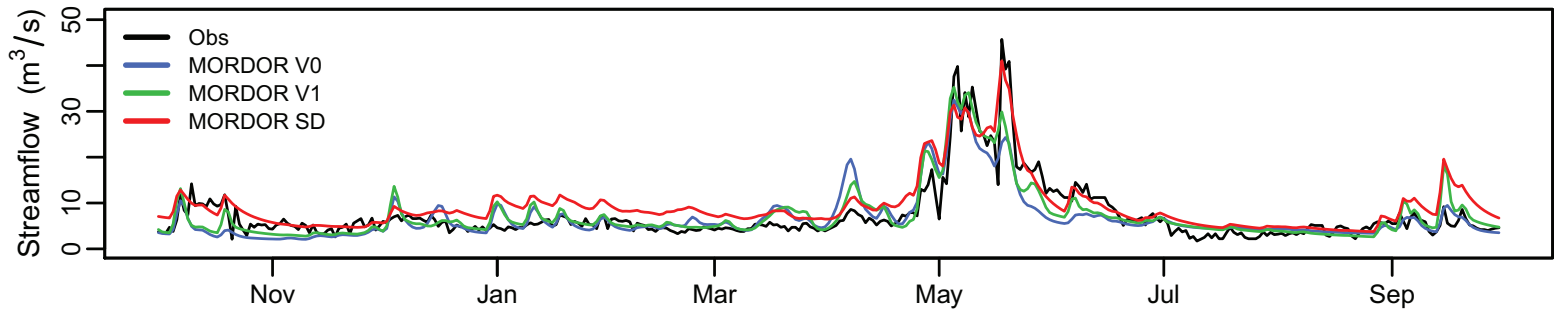

## Year 2000

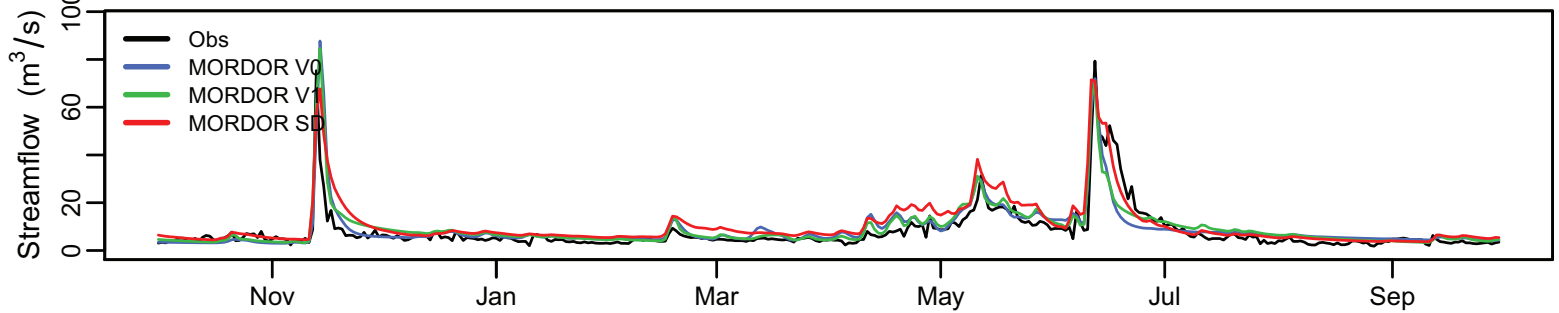

# Tet@Vinca

Year 2001

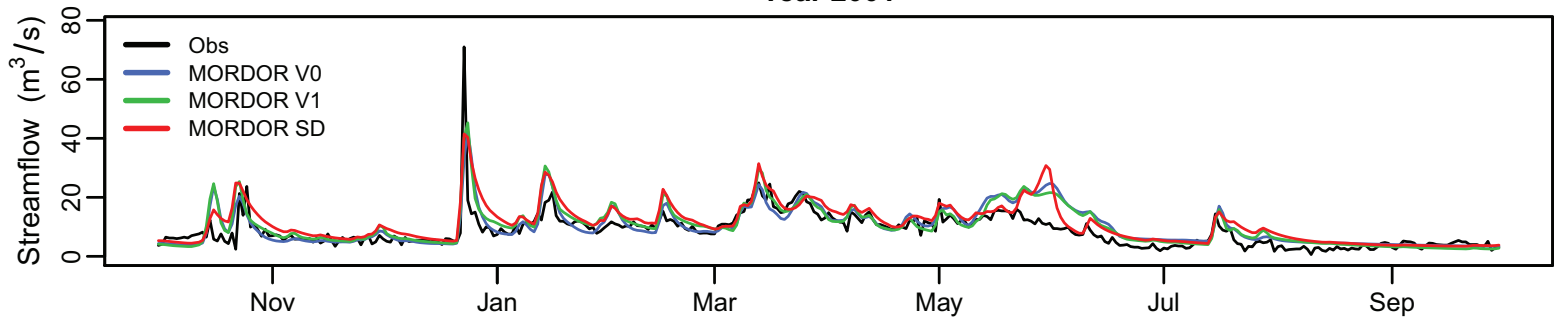

## Year 2002

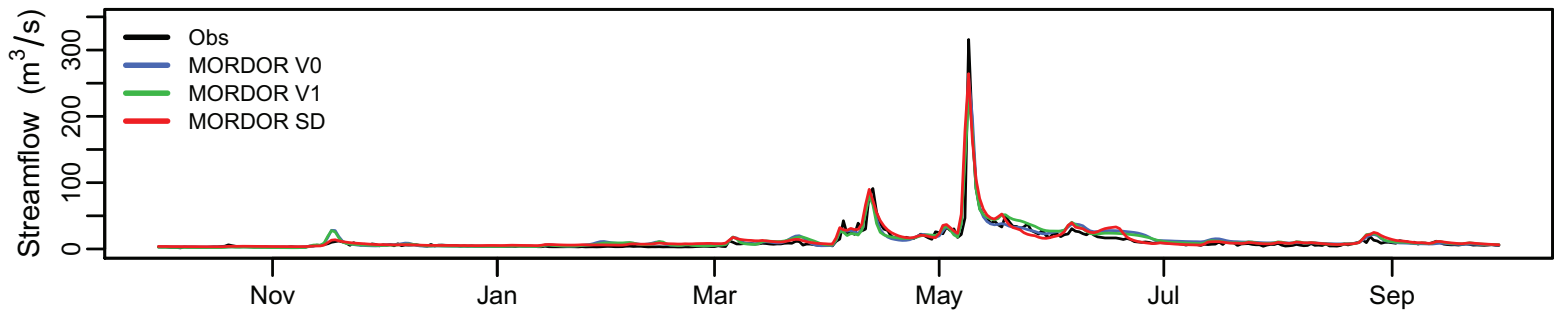

## Year 2003

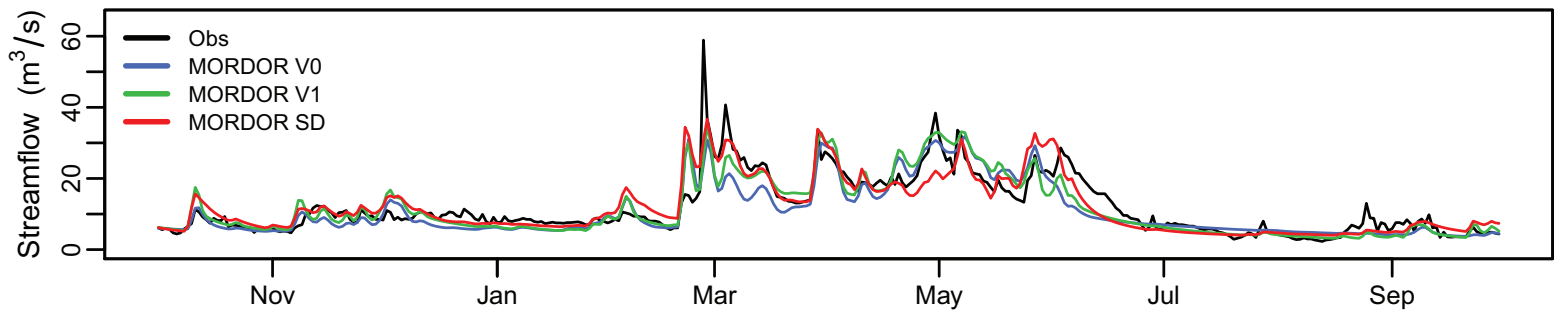

## Year 2004

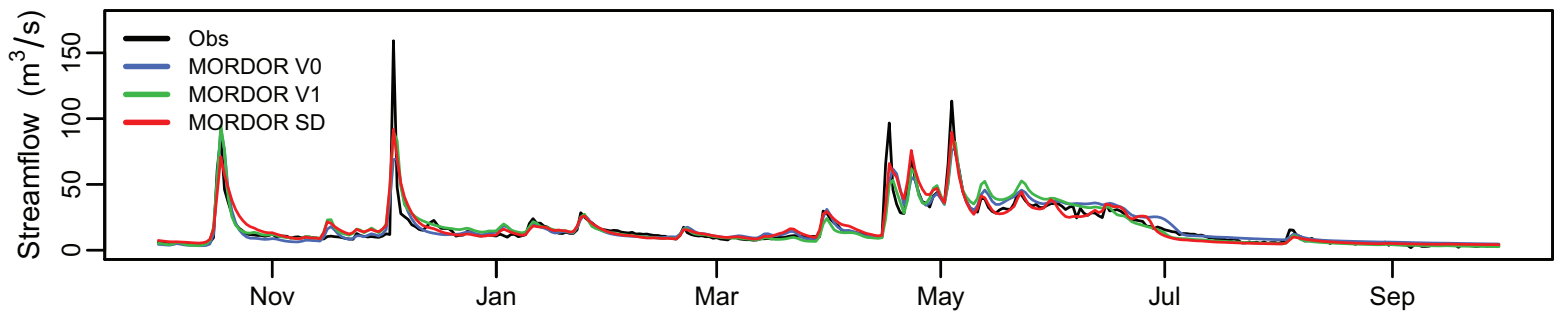

## Year 2005

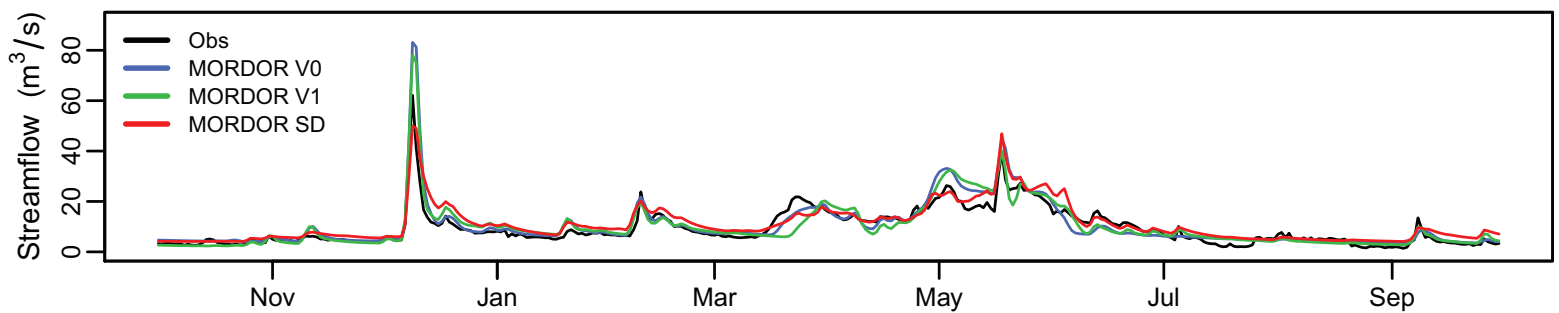

## Year 2006

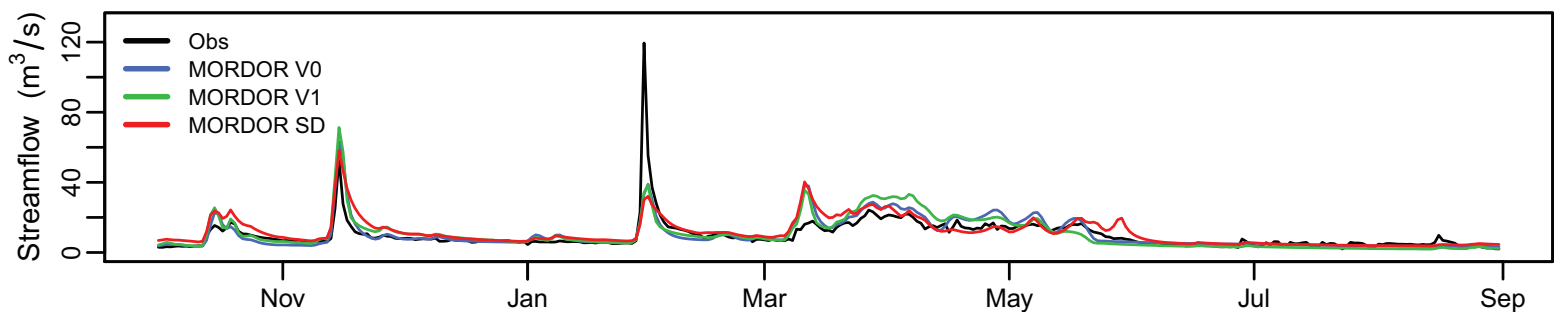

# Tinee@PontLune

Year 1982

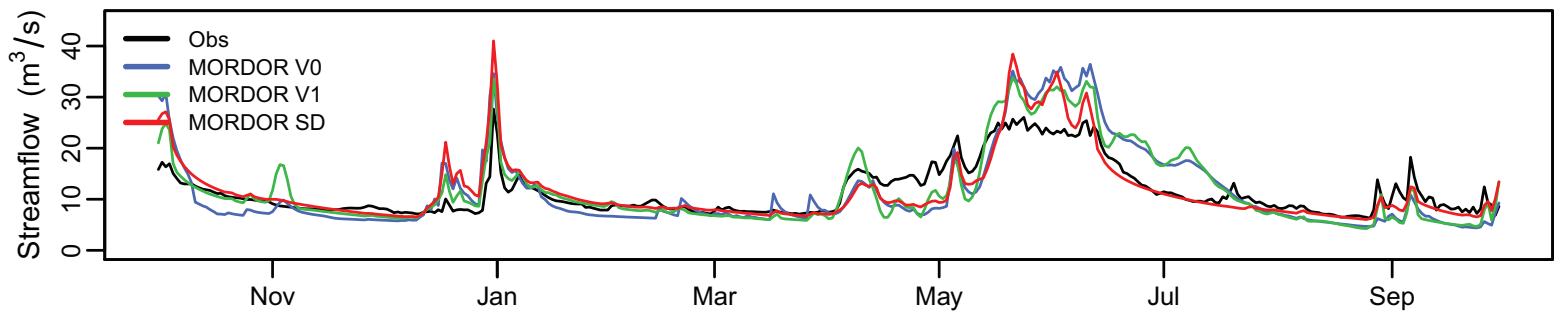

Year 1983

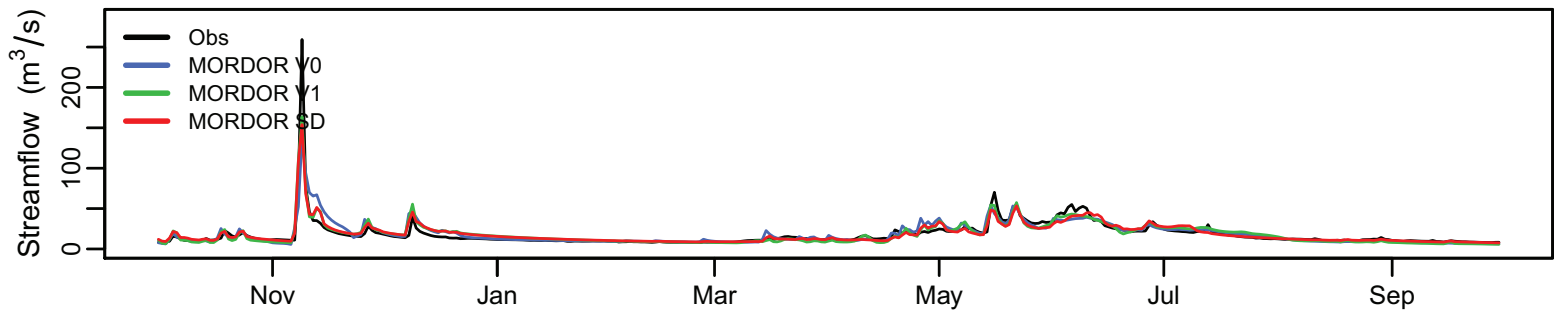

Year 1984

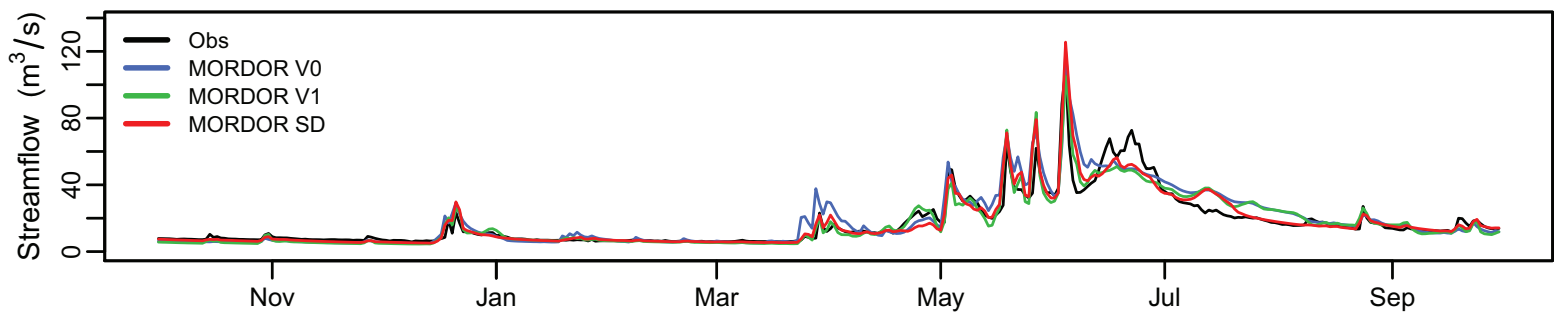

Year 1985

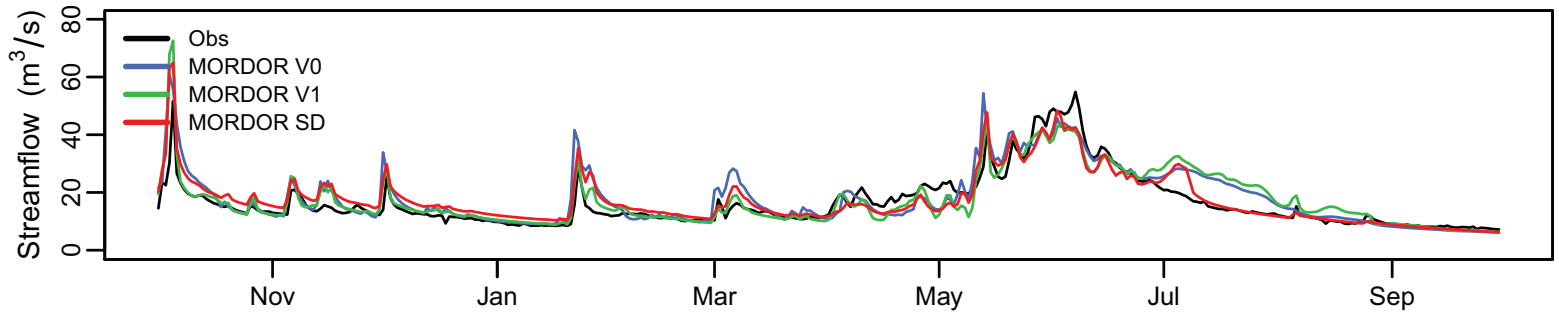

Year 1986

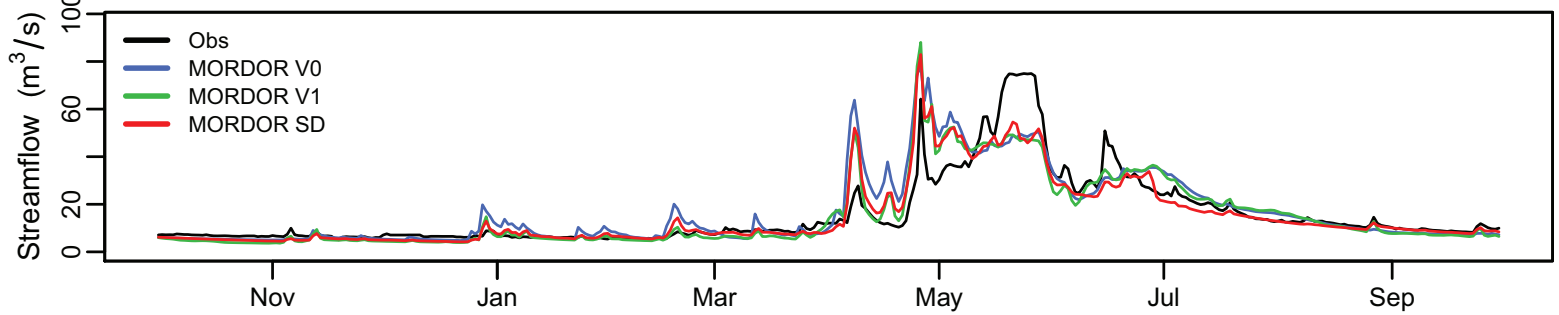

Year 1987

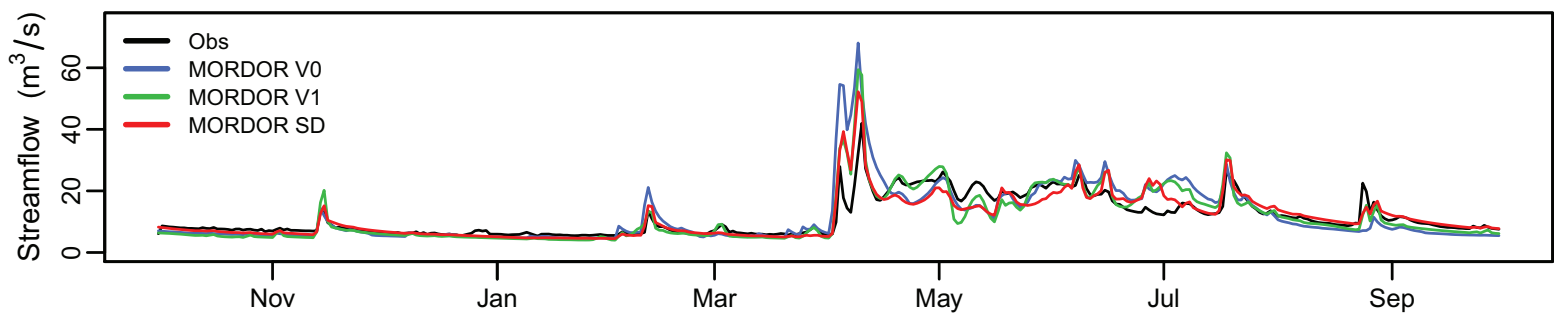

# Tinee@PontLune

Year 1988

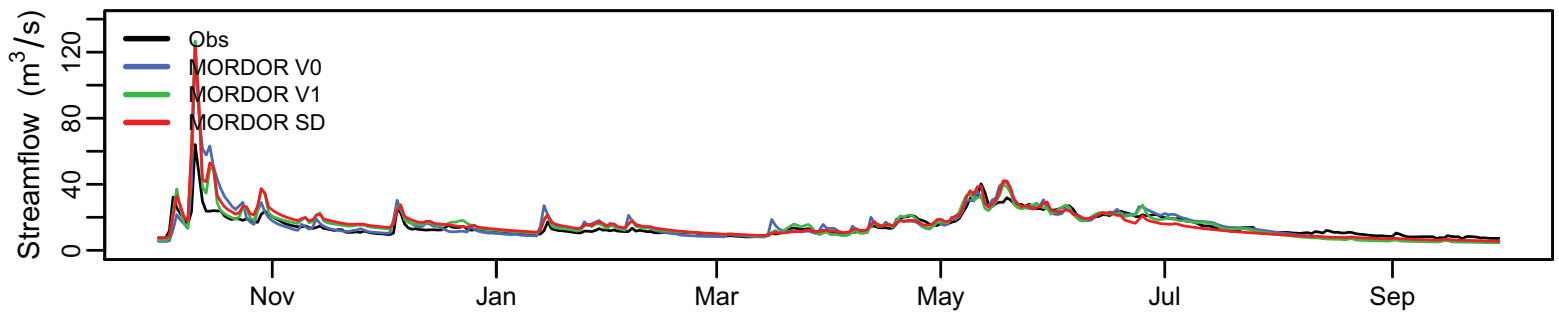

Year 1989

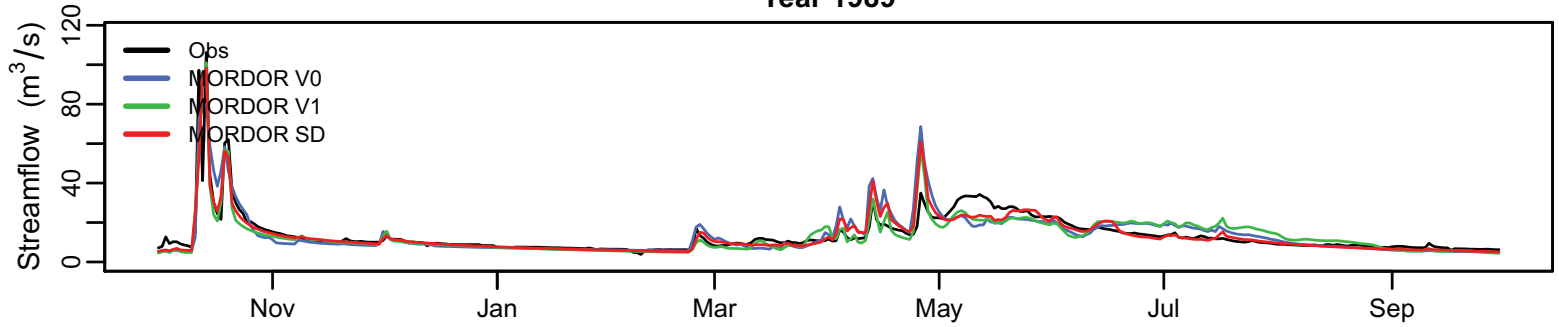

Year 1990

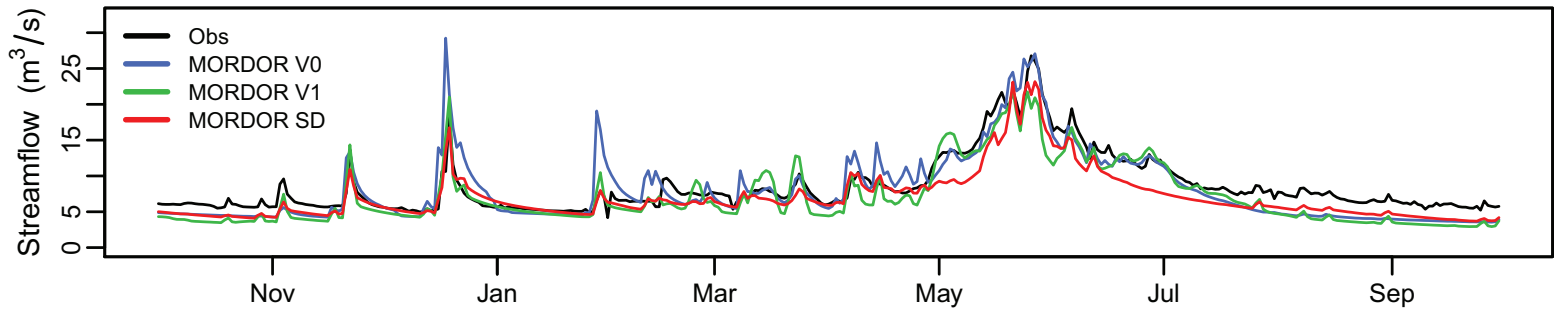

Year 1991

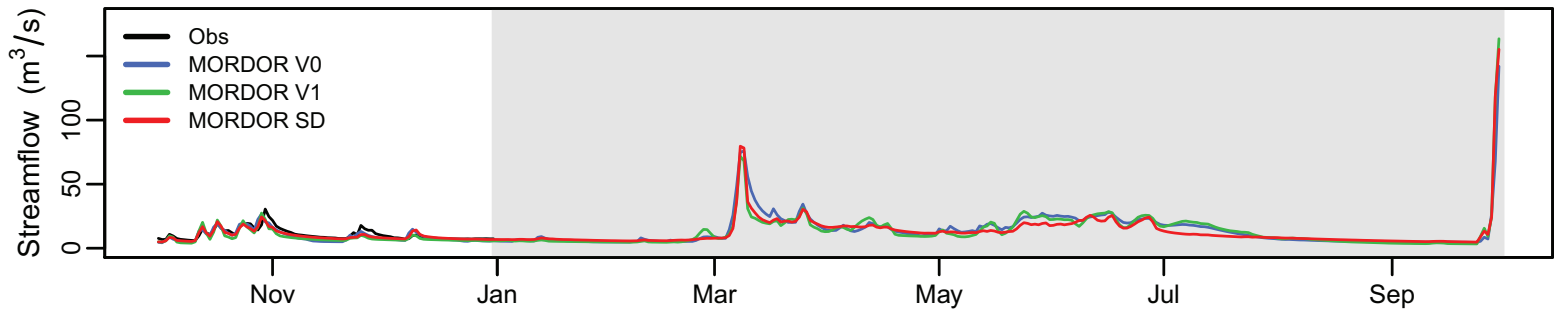

Year 1992

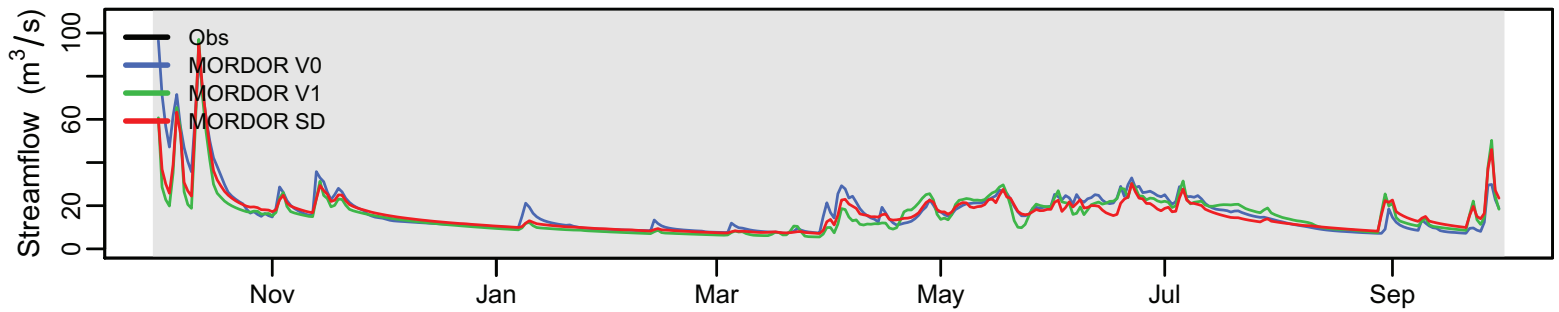

Year 1993

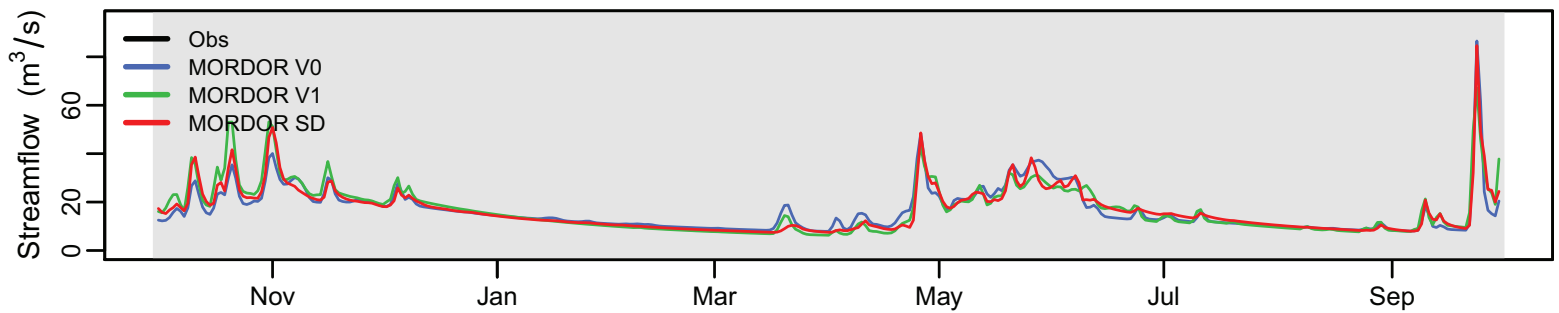

# Tinee@PontLune

Year 1994

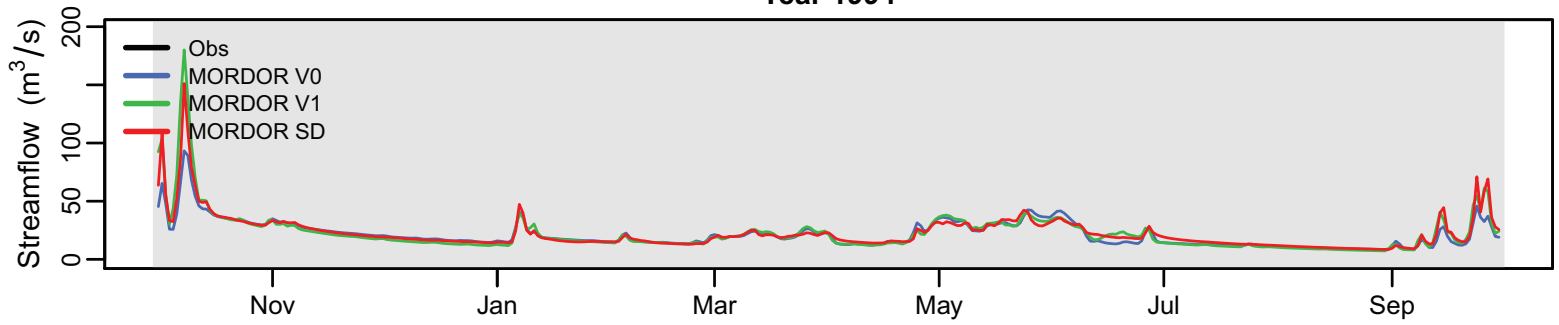

Year 1995

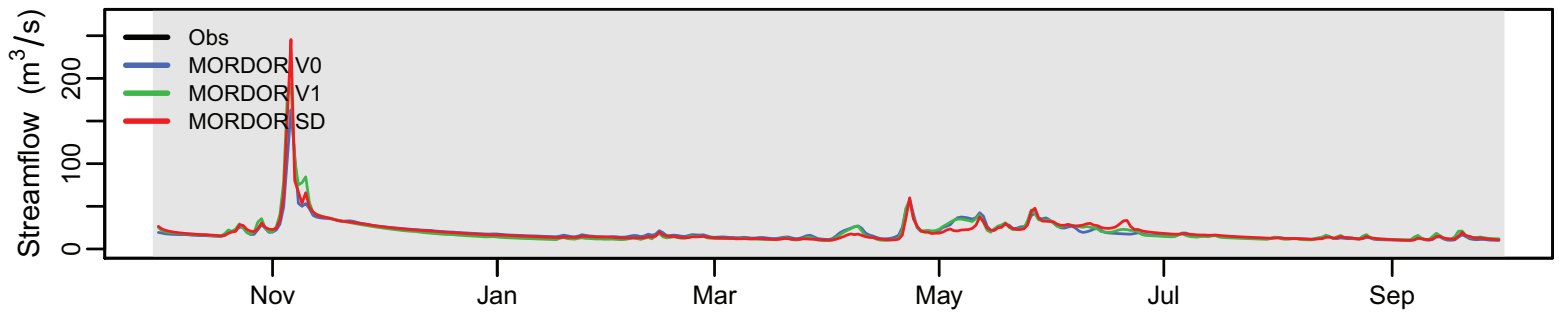

Year 1996

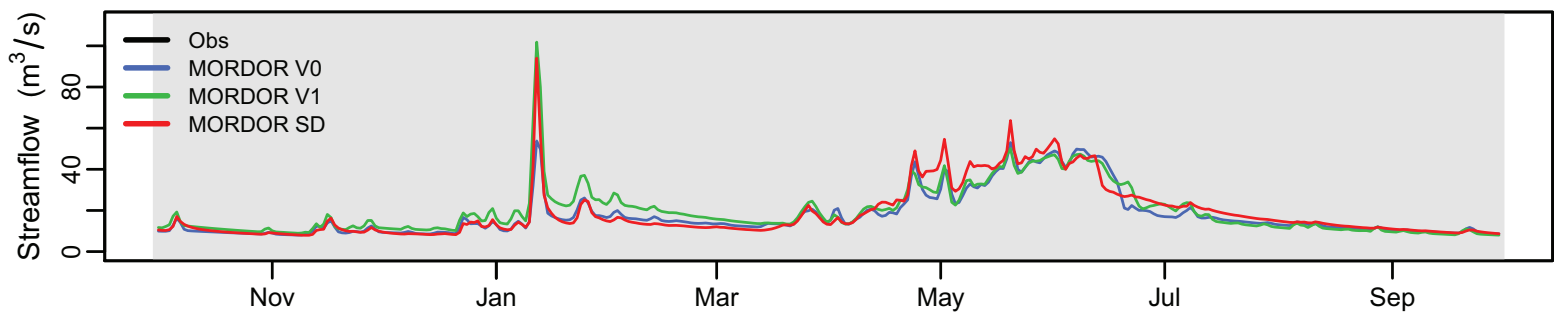

Year 1997

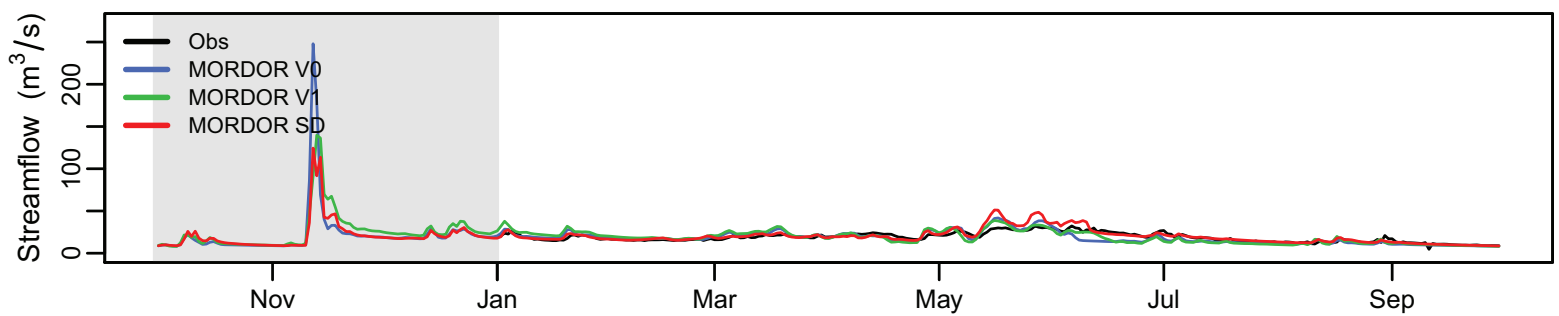

Year 1998

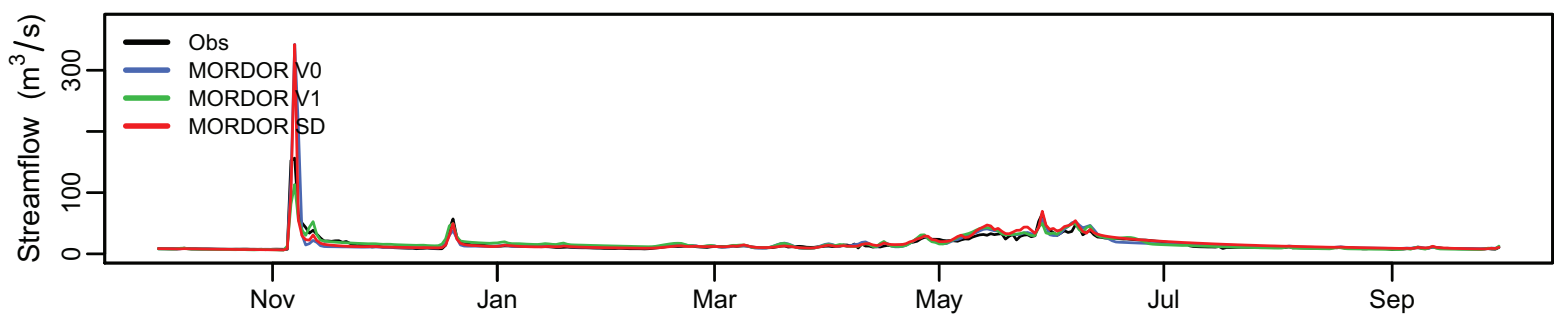

Year 1999

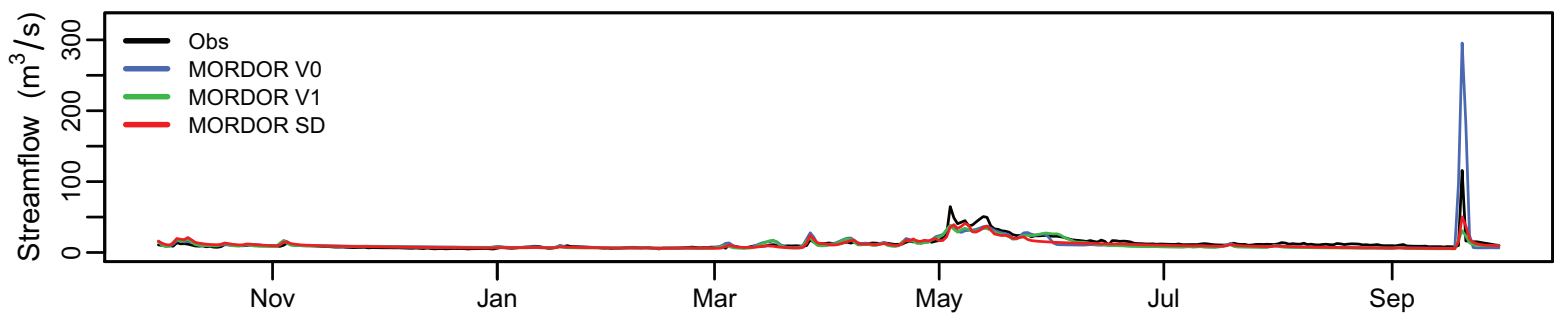

# Tinee@PontLune

Year 2000

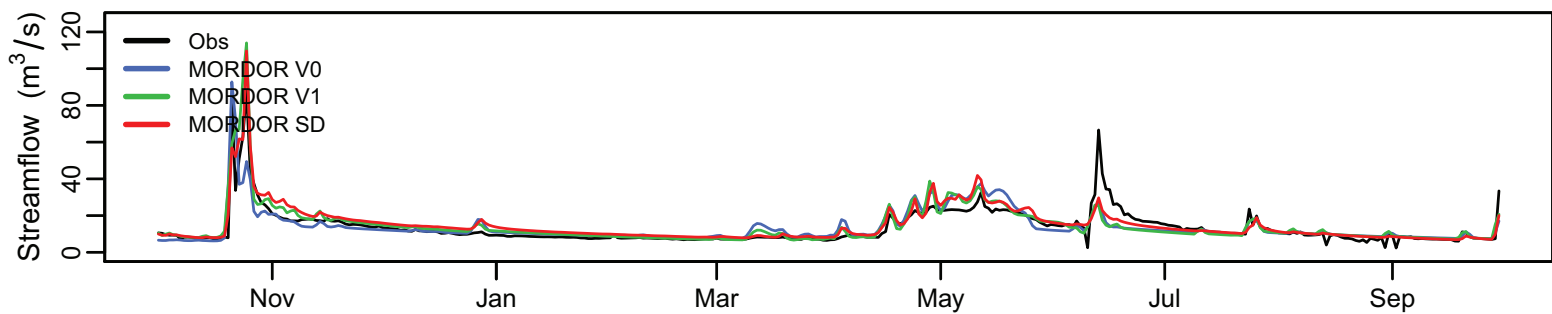

Year 2001

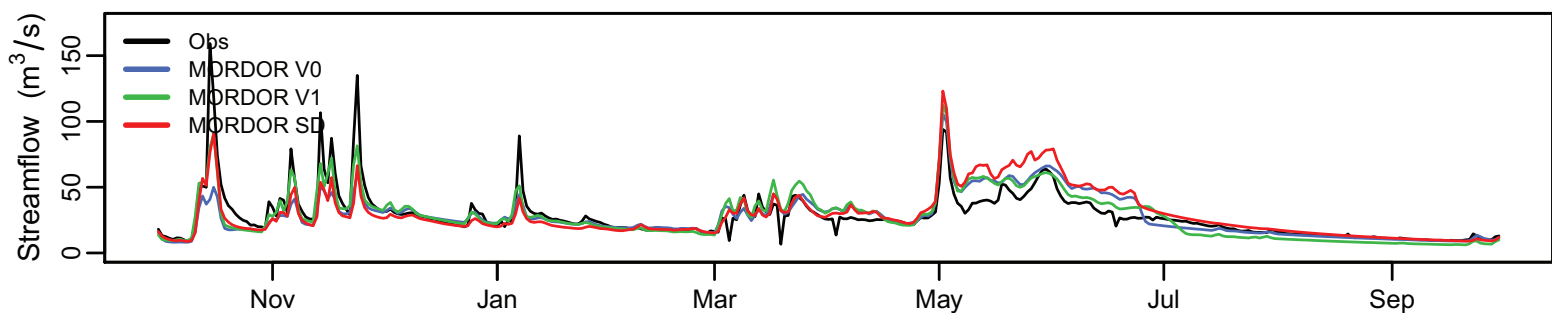

Year 2002

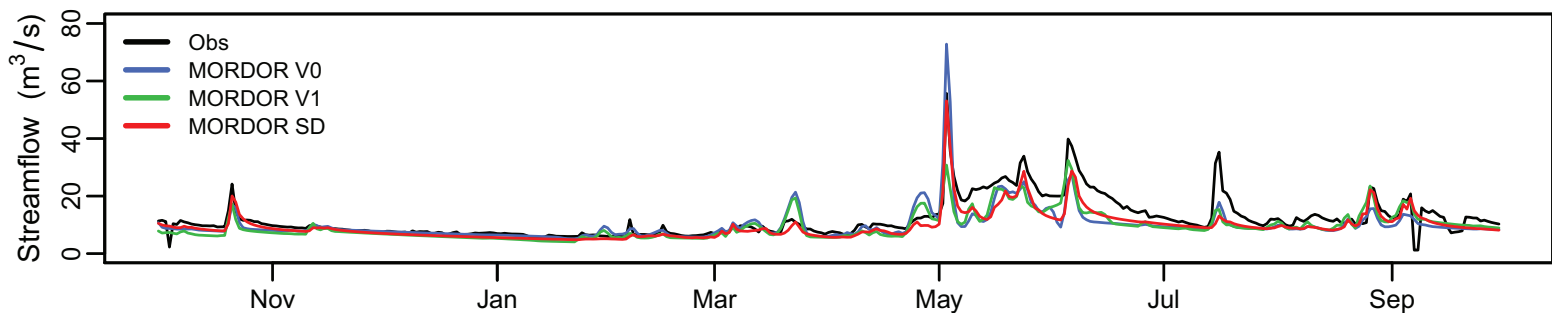

# Truyere@Grandval

Year 1974

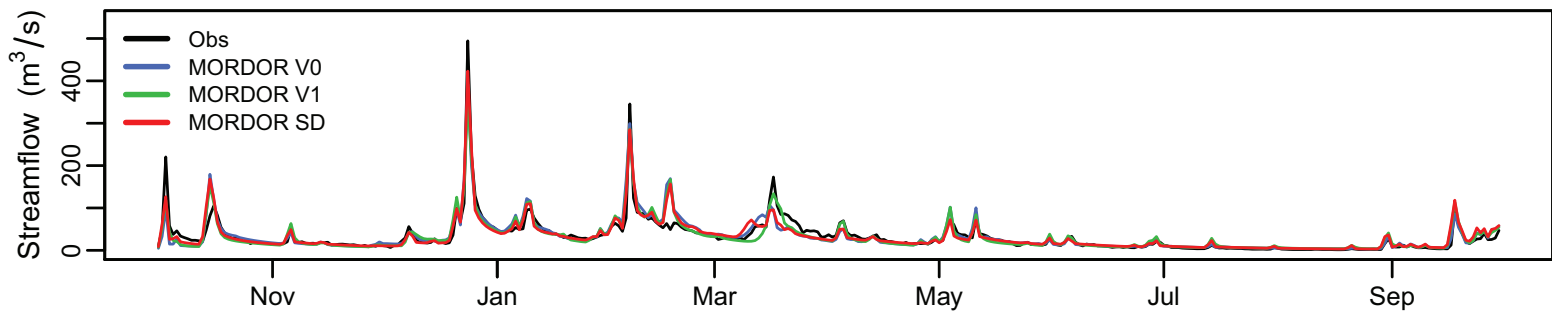

Year 1975

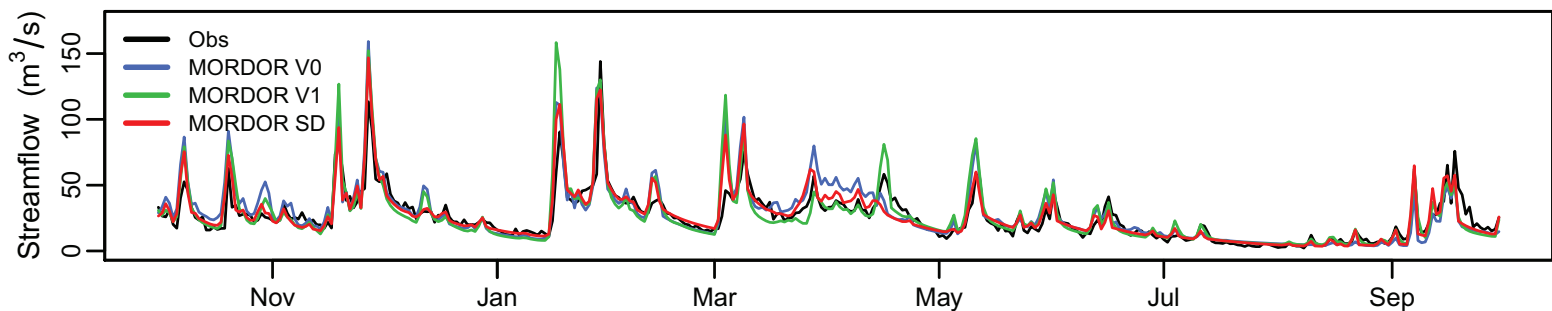

Year 1976

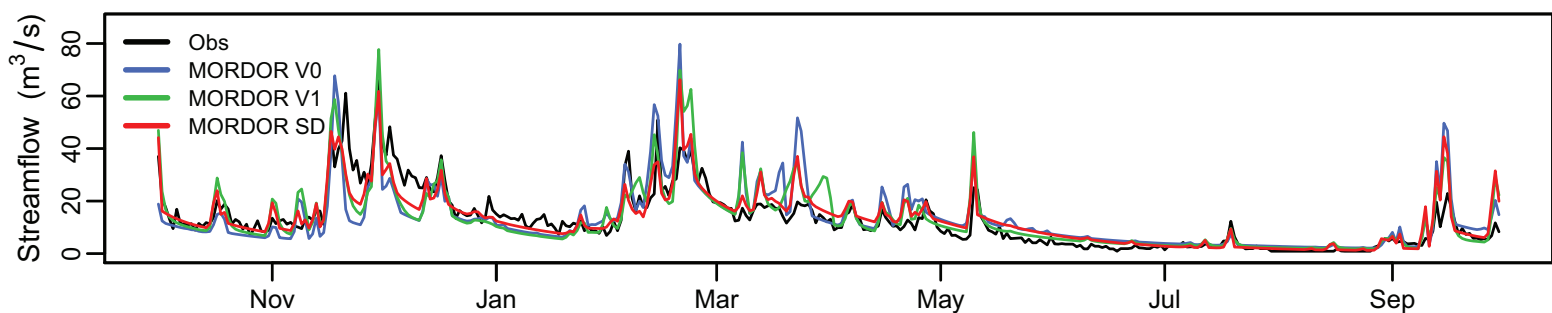

Year 1977

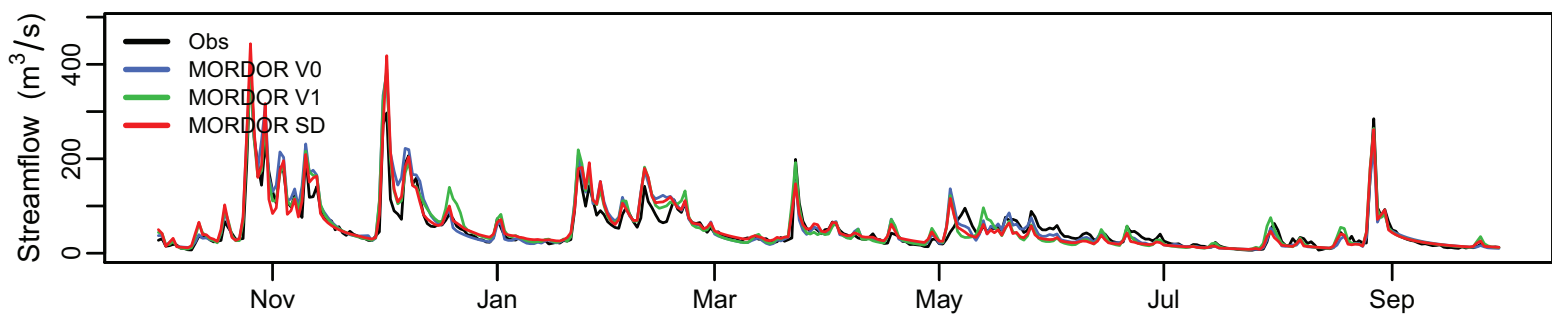

Year 1978

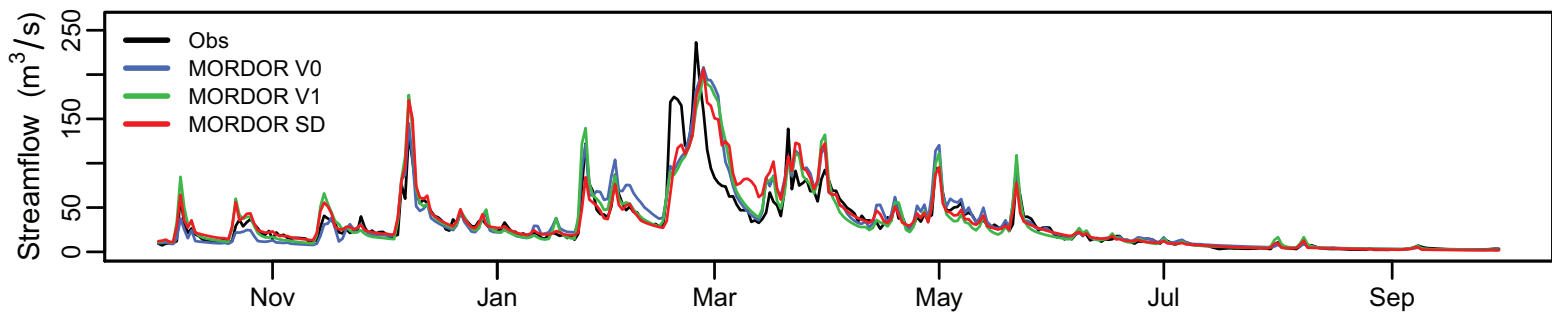

Year 1979

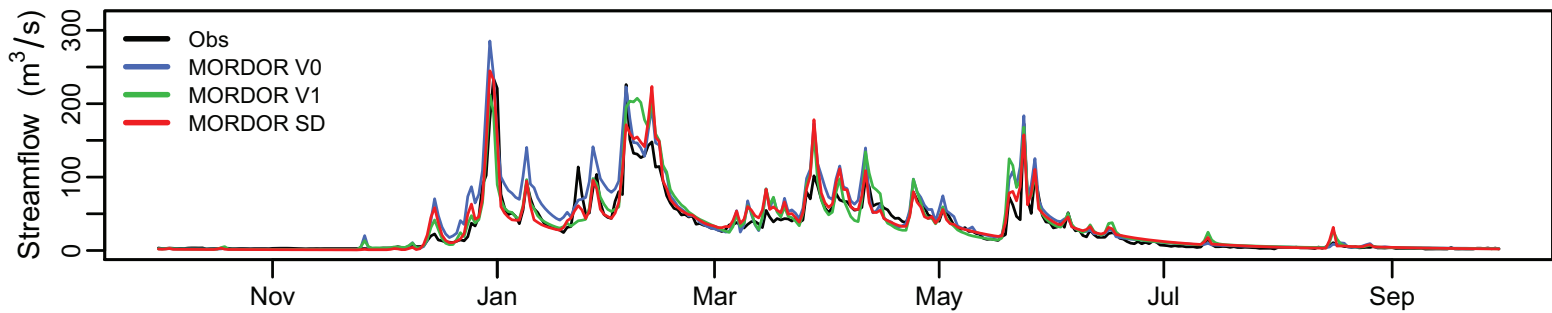

# Truyere@Grandval

Year 1980

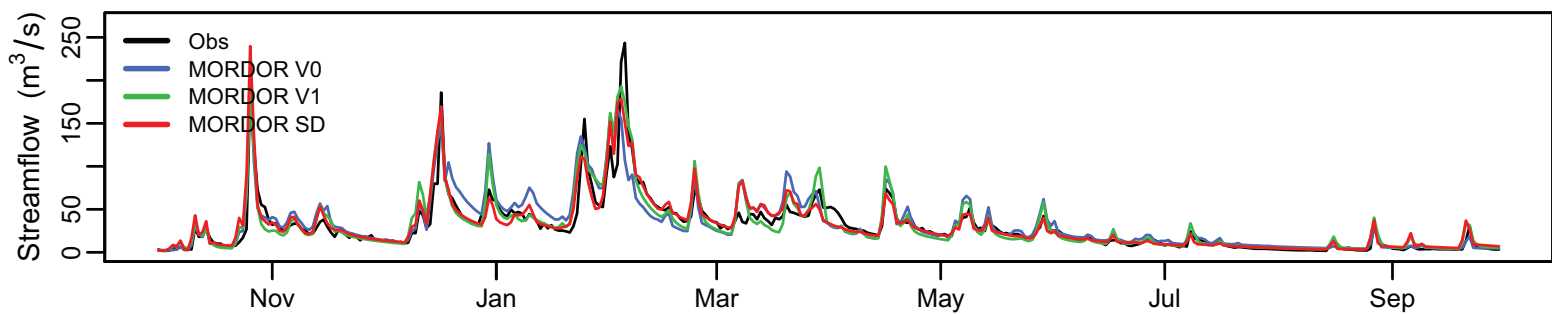

Year 1981

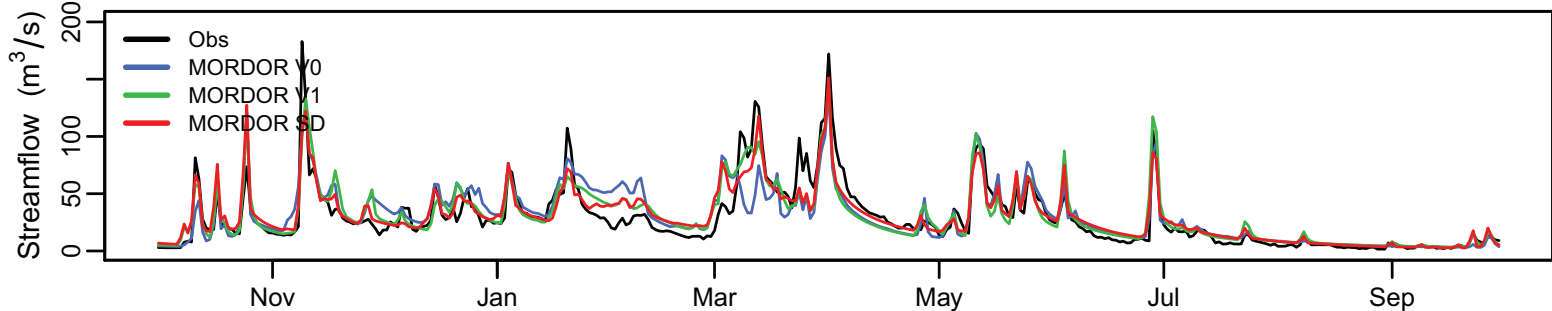

Year 1982

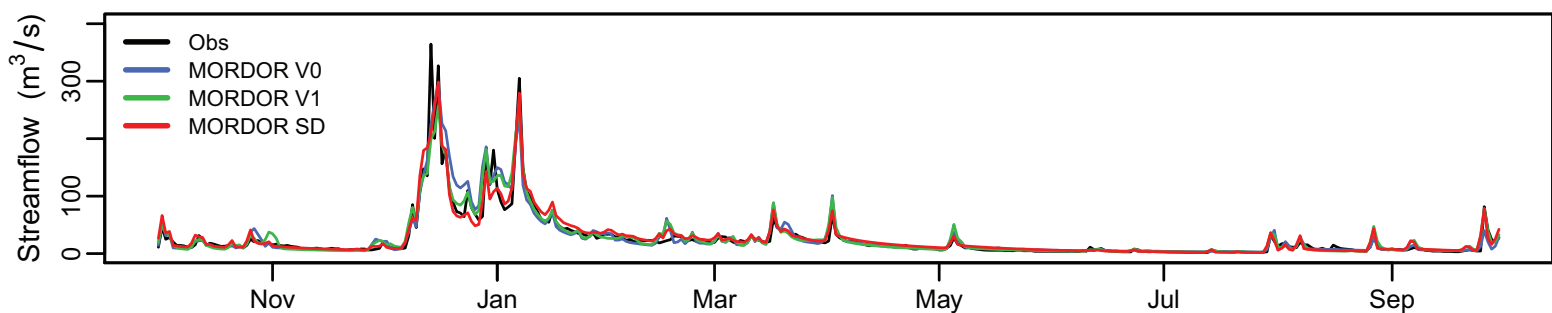

Year 1983

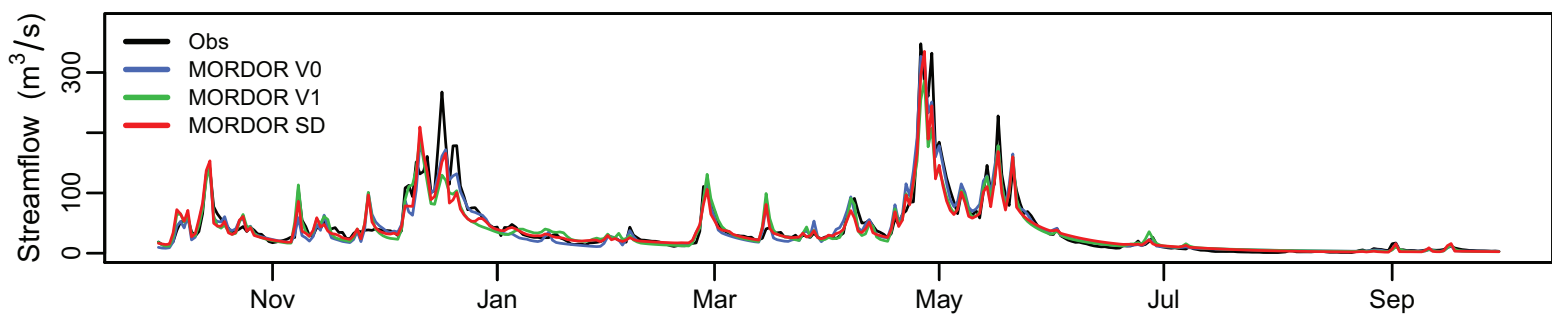

Year 1984

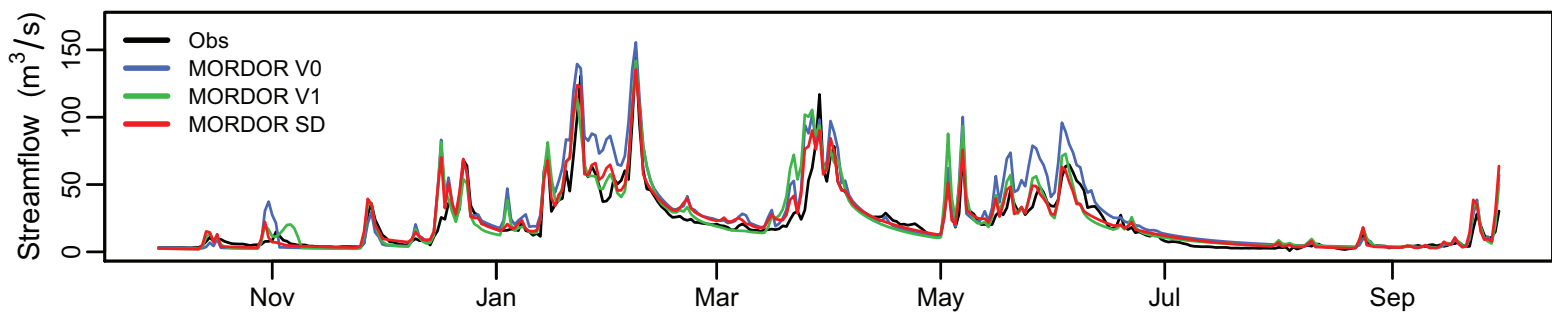

Year 1985

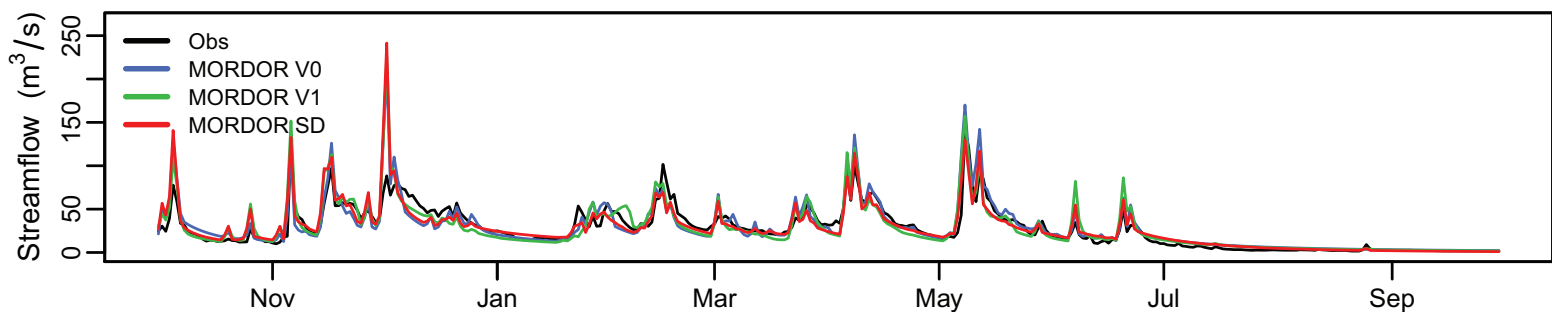



# Truyere@Grandval

Year 1986

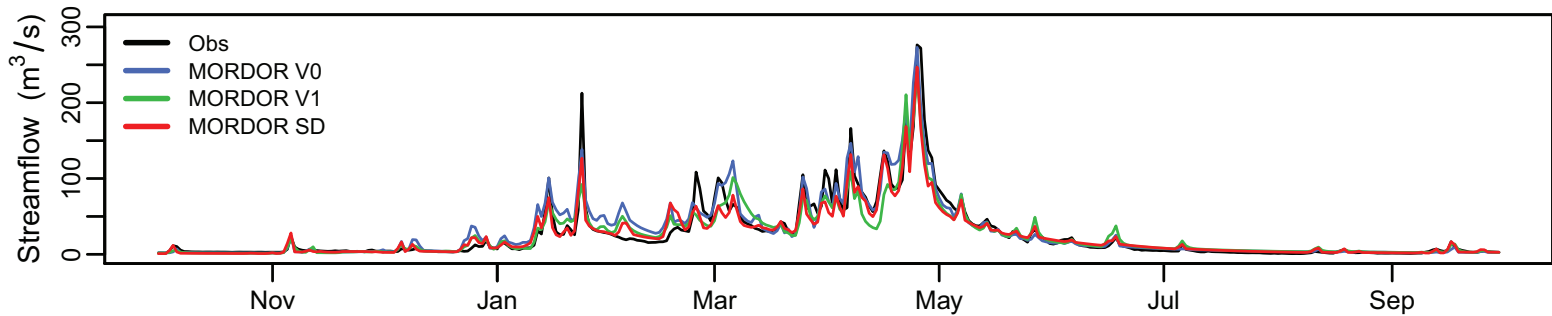

Year 1987

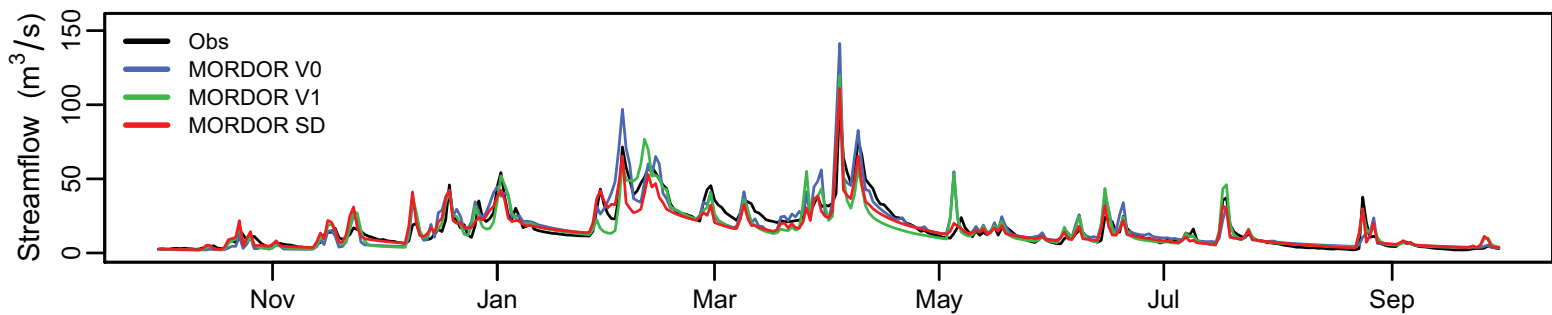

Year 1988

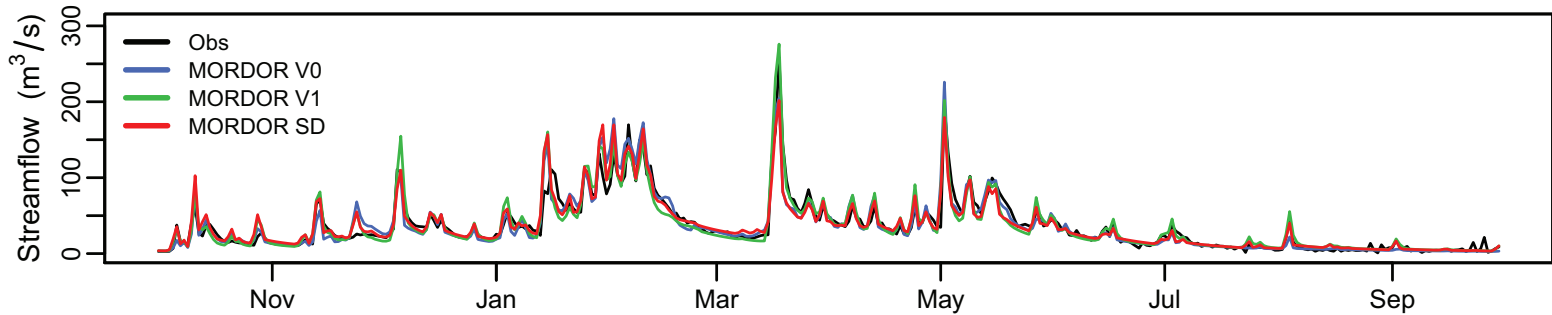

Year 1989

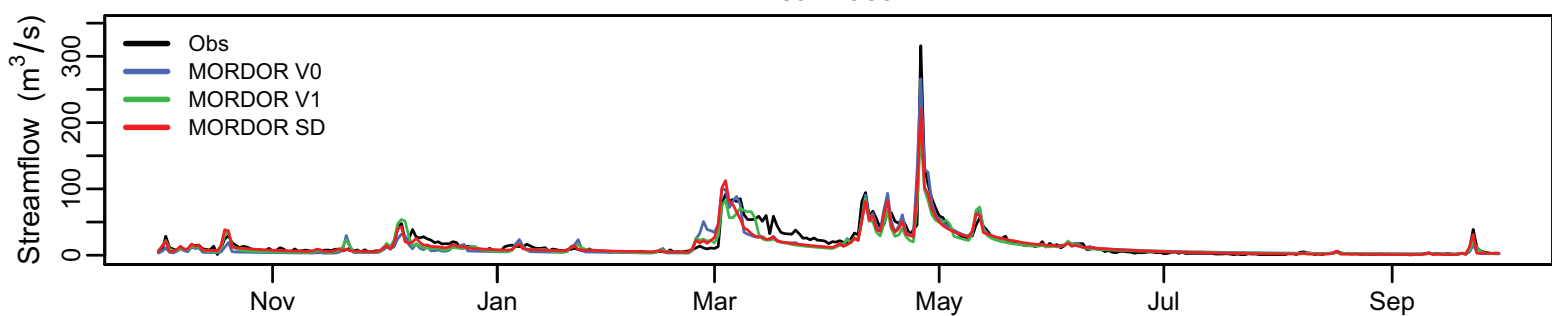

Year 1990

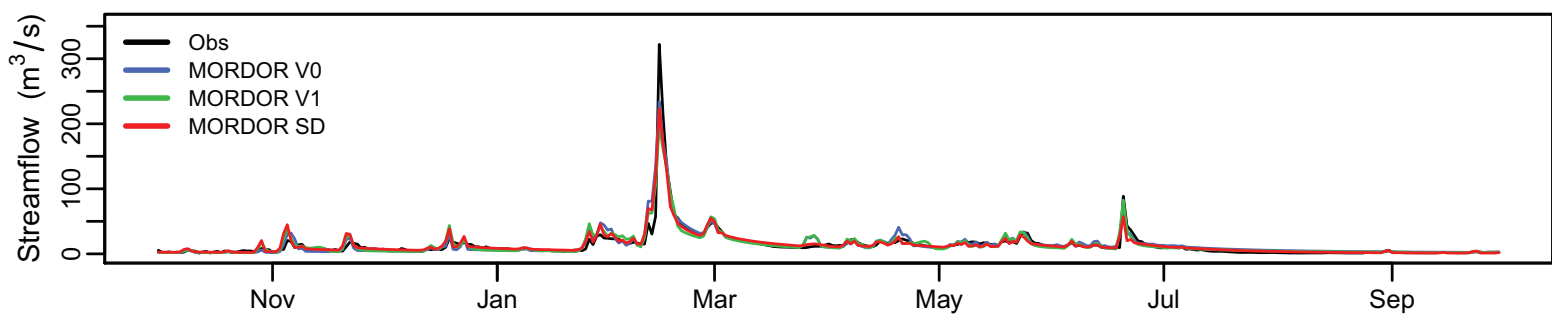

Year 1991

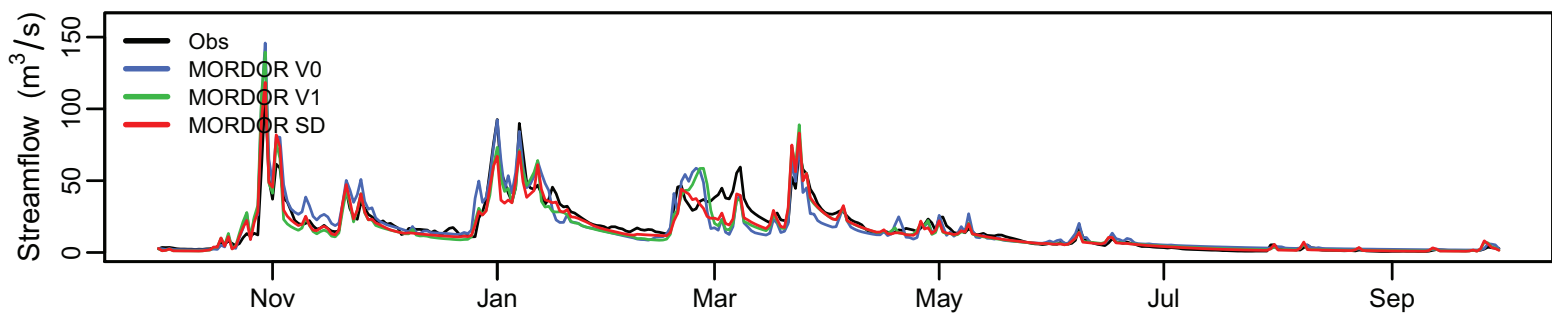

# Truyere@Grandval

Year 1992

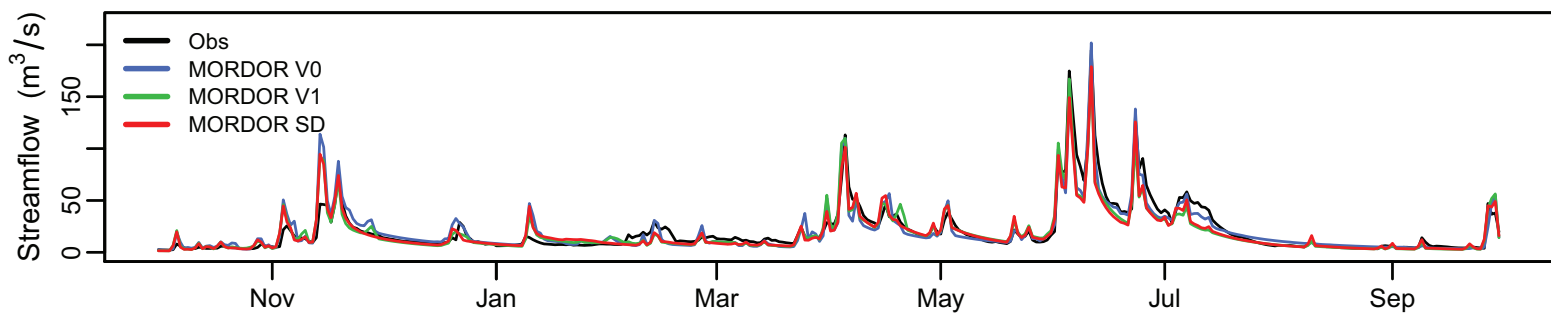

Year 1993

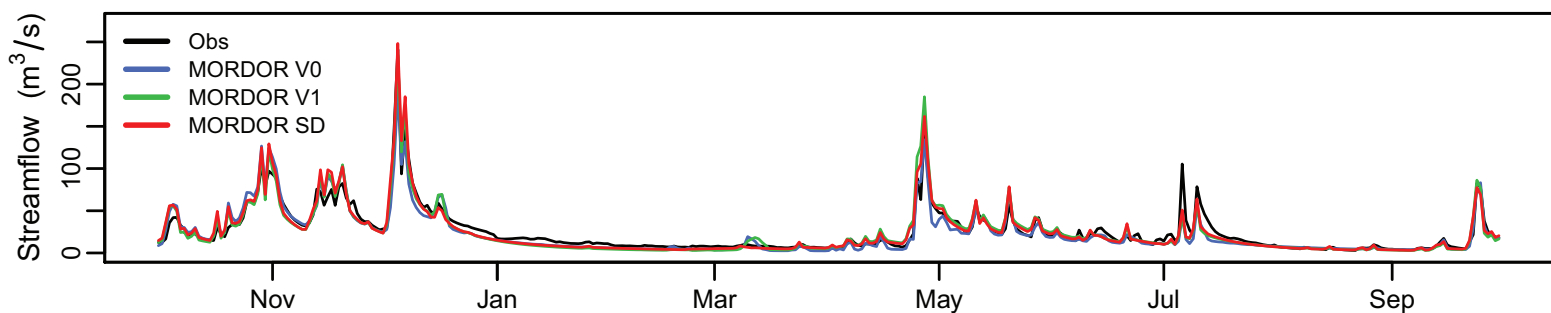

Year 1994

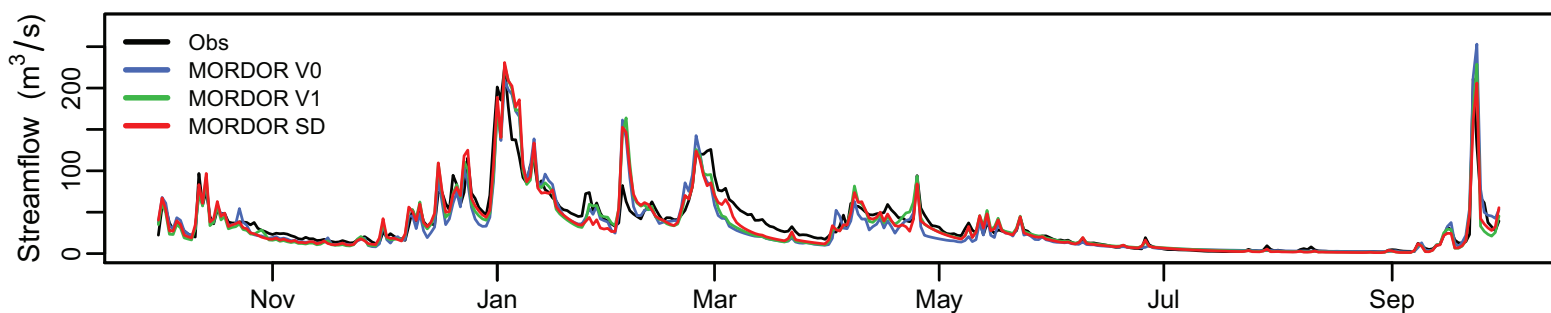

Year 1995

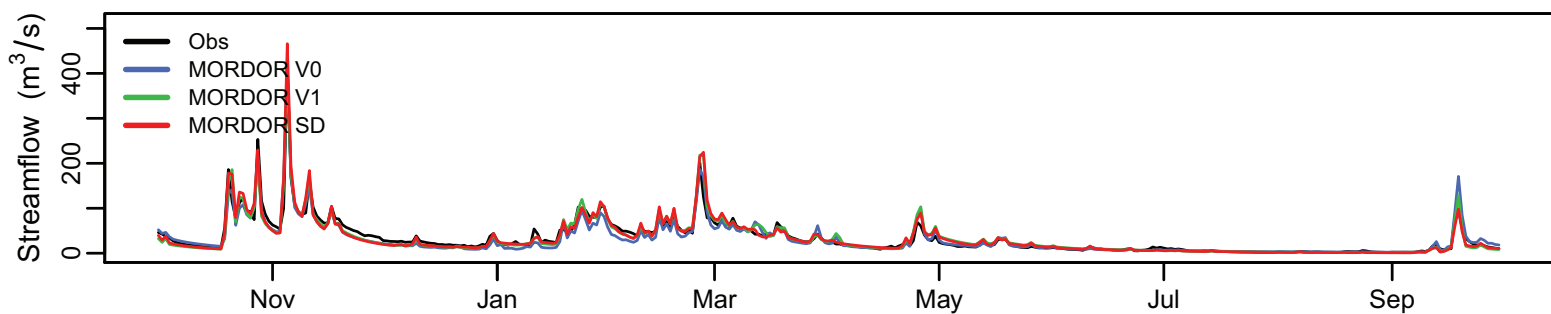

Year 1996

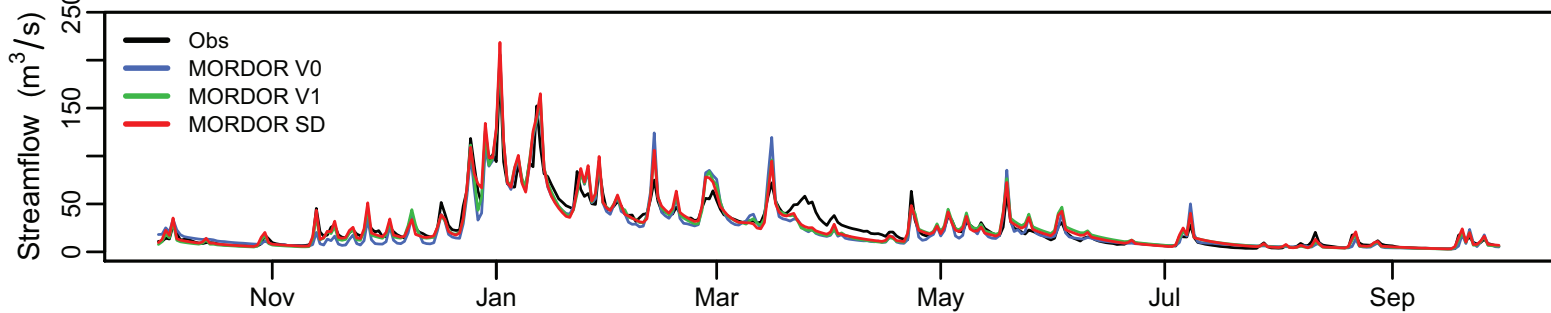

Year 1997

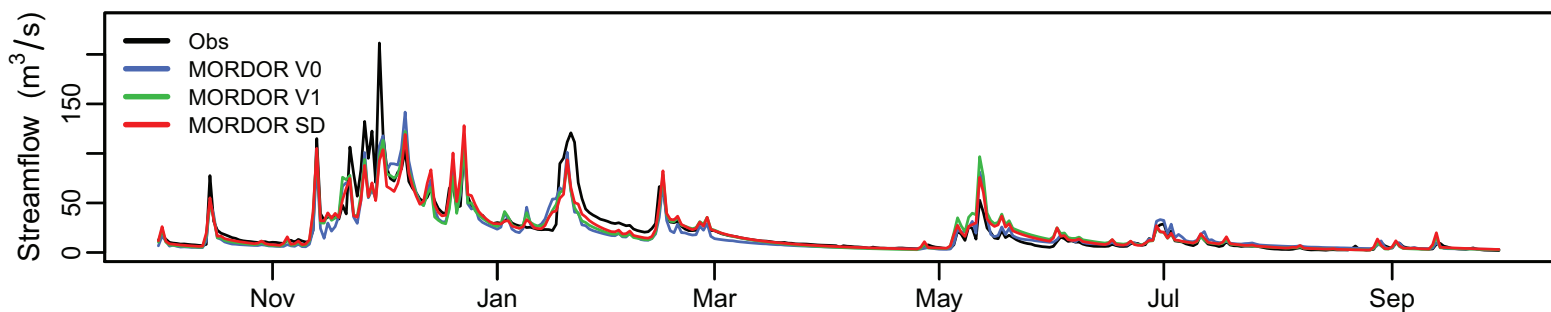

# Truyere@Grandval

Year 1998

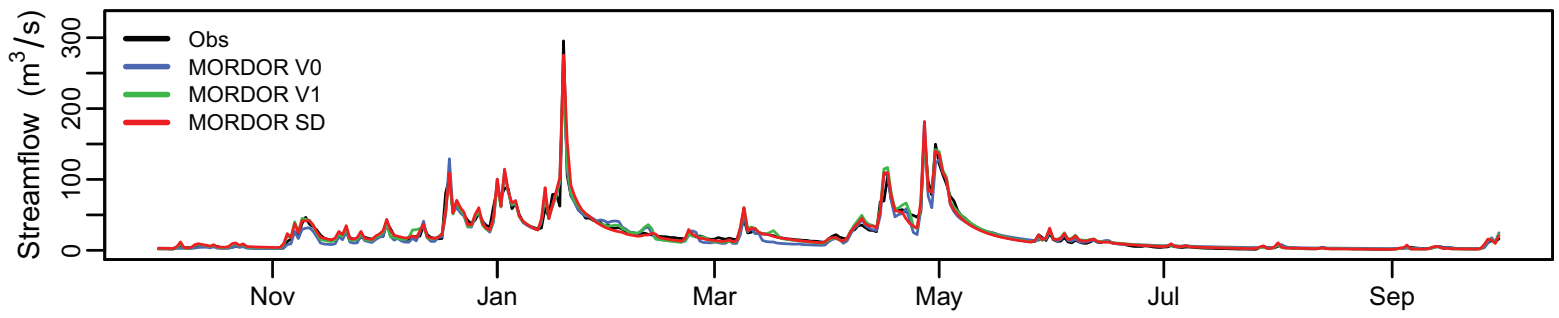

Year 1999

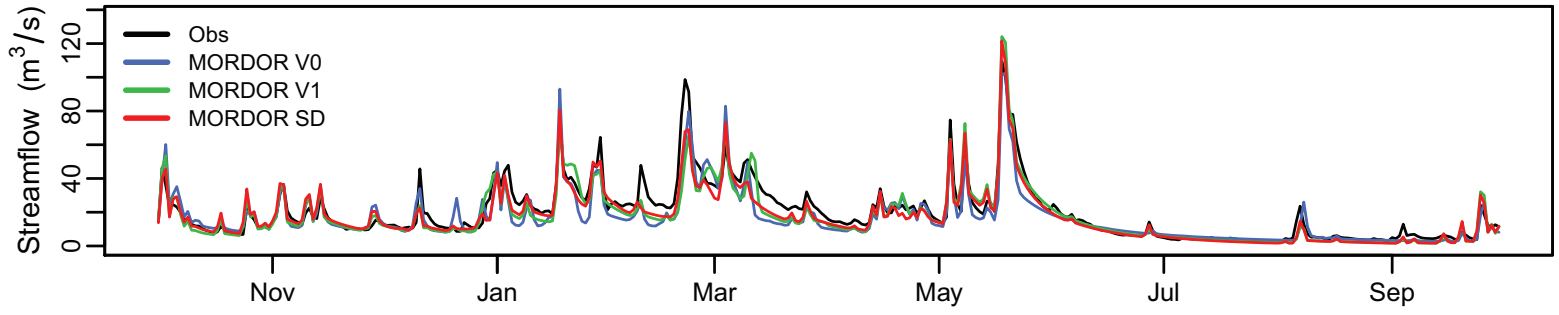

Year 2000

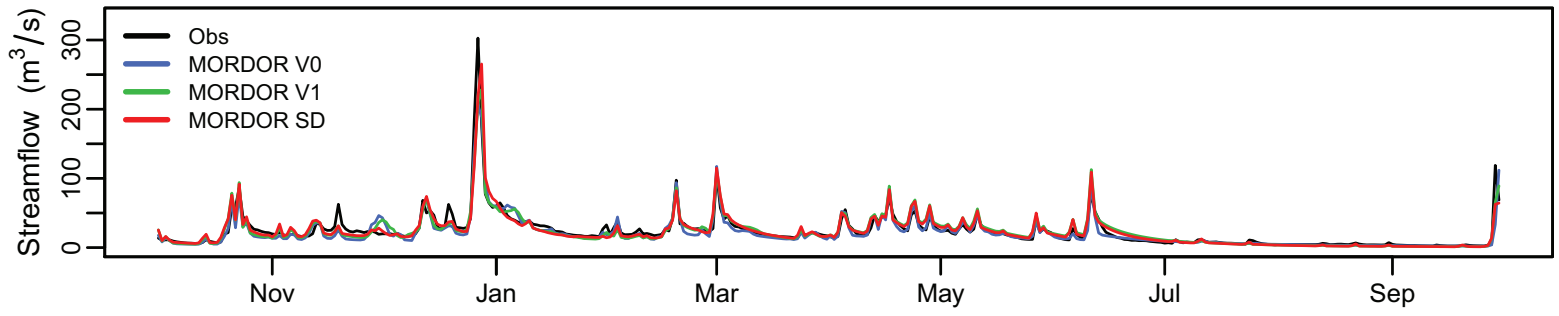

Year 2001

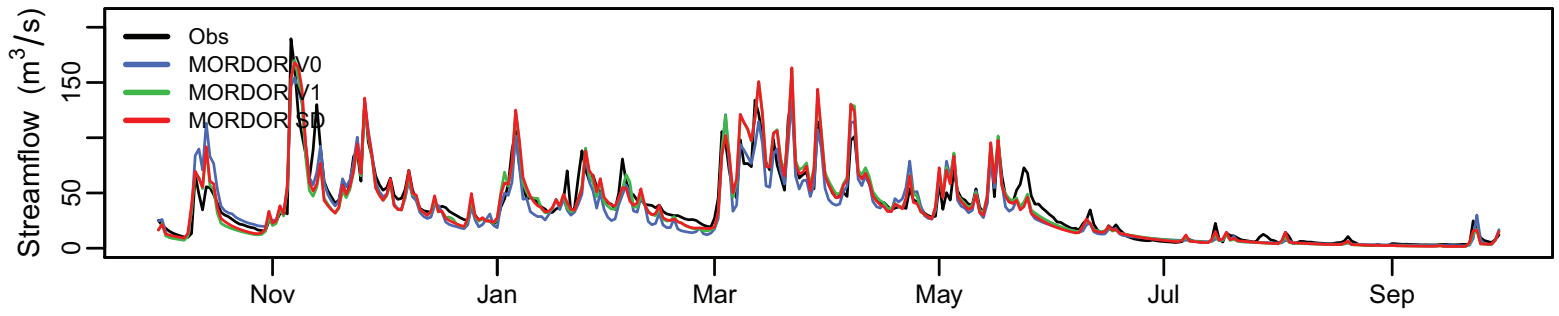

Year 2002

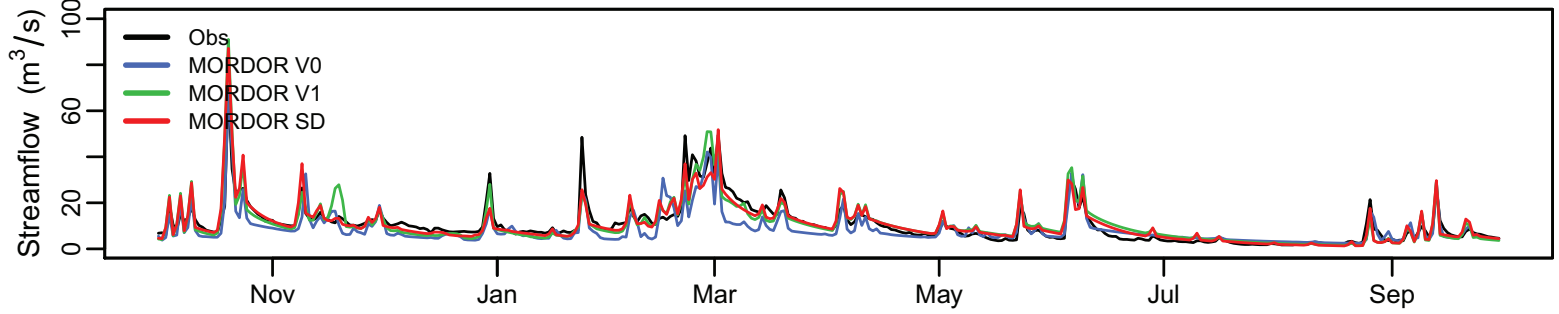

Year 2003

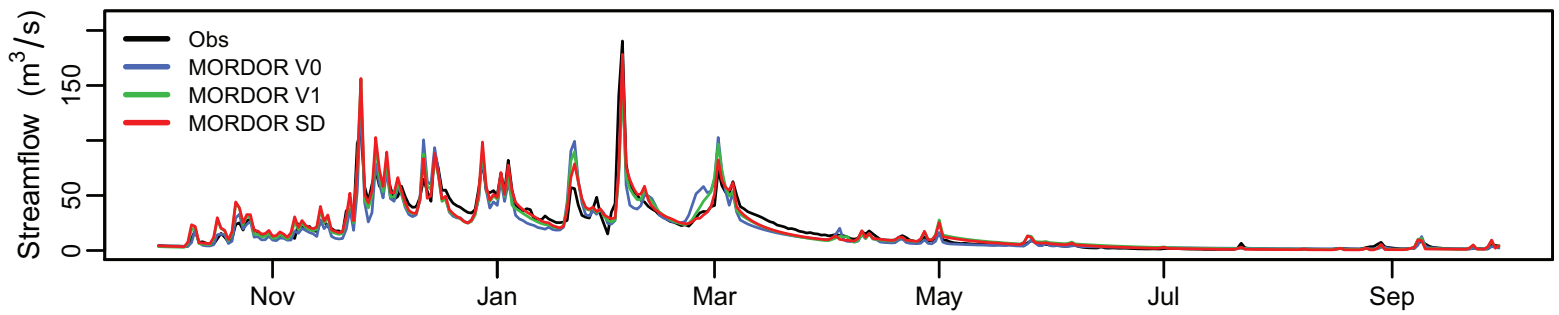

# Truyere@Grandval

Year 2004

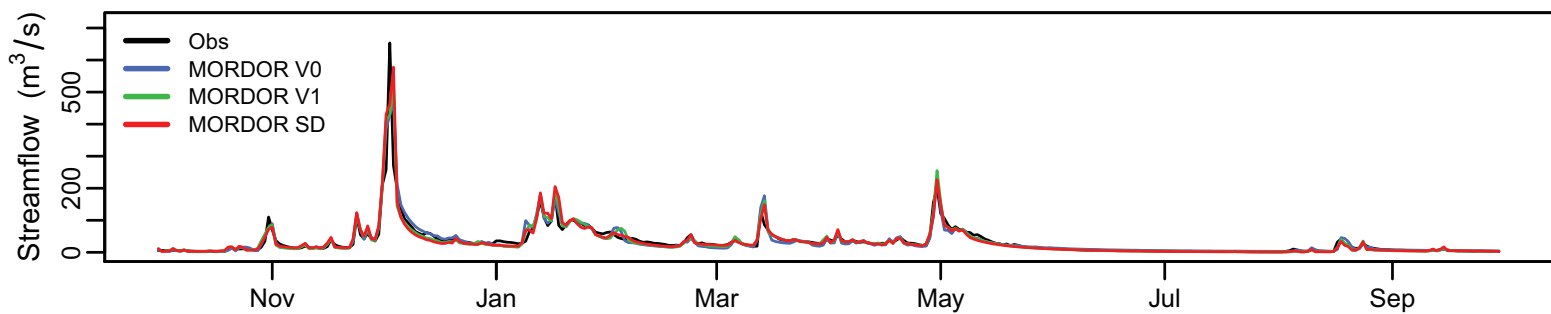

Year 2005

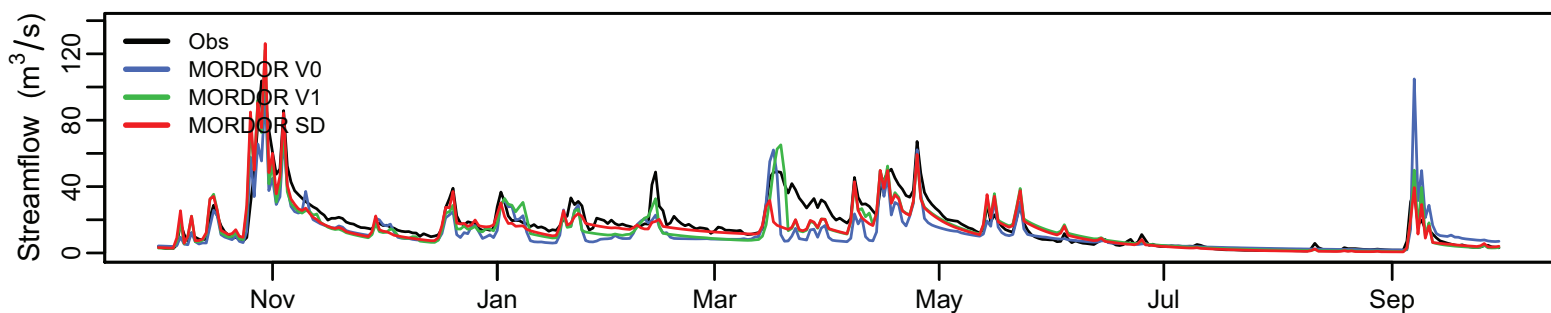

Year 2006

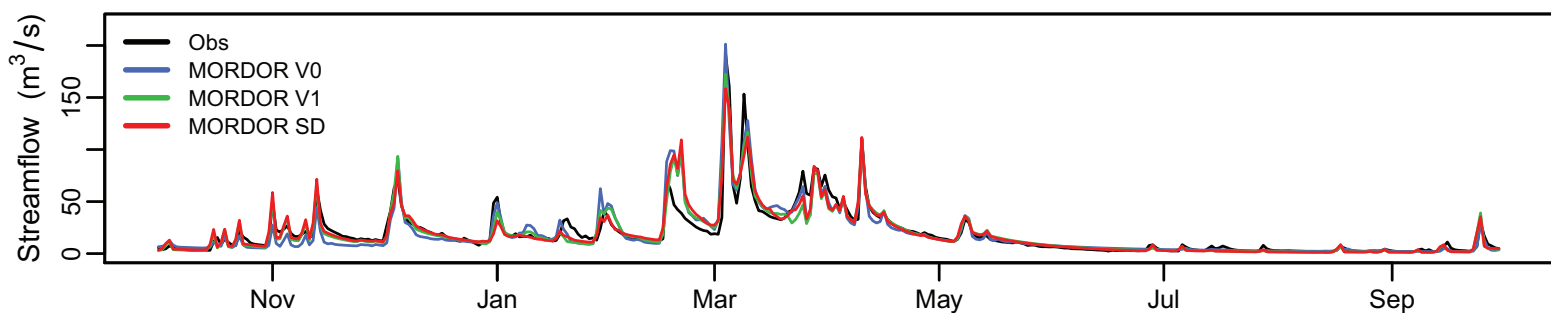

# Ubaye@RocheRousse

Year 1983

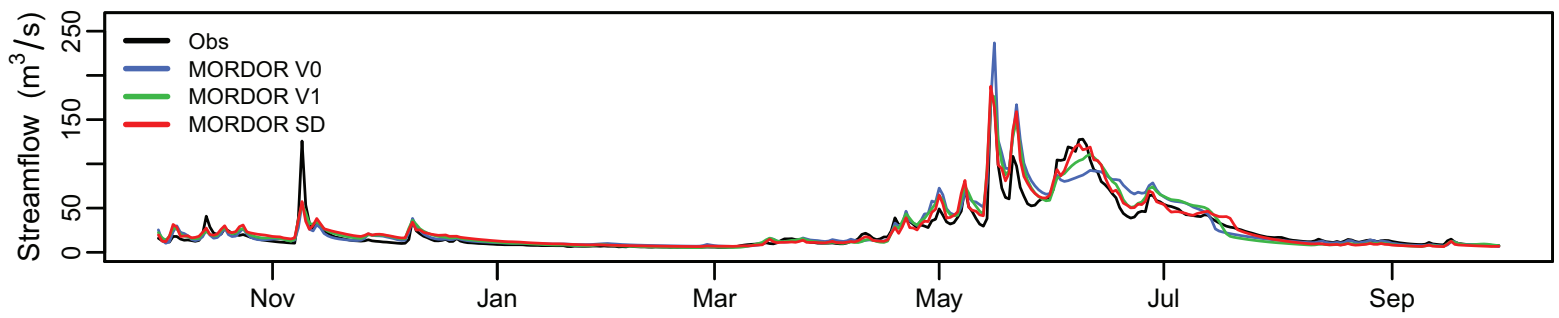

Year 1984

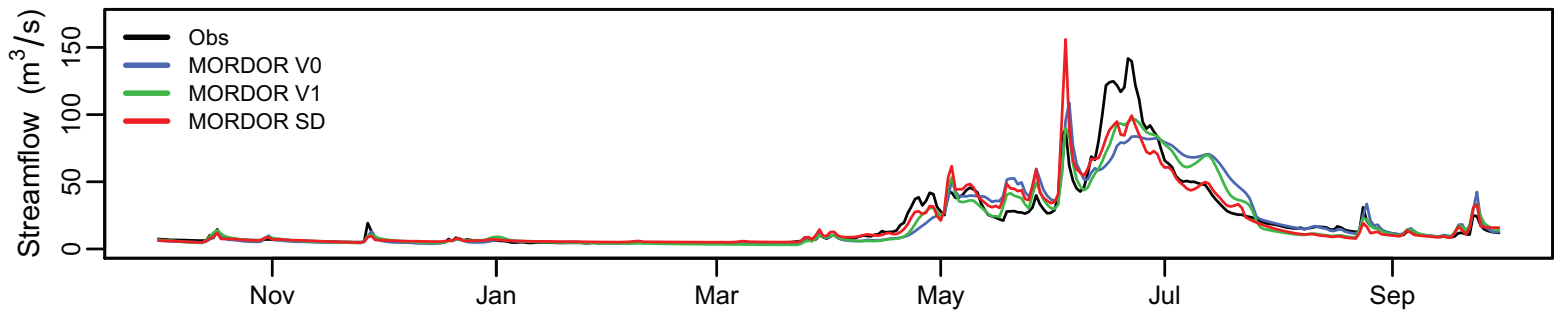

Year 1985

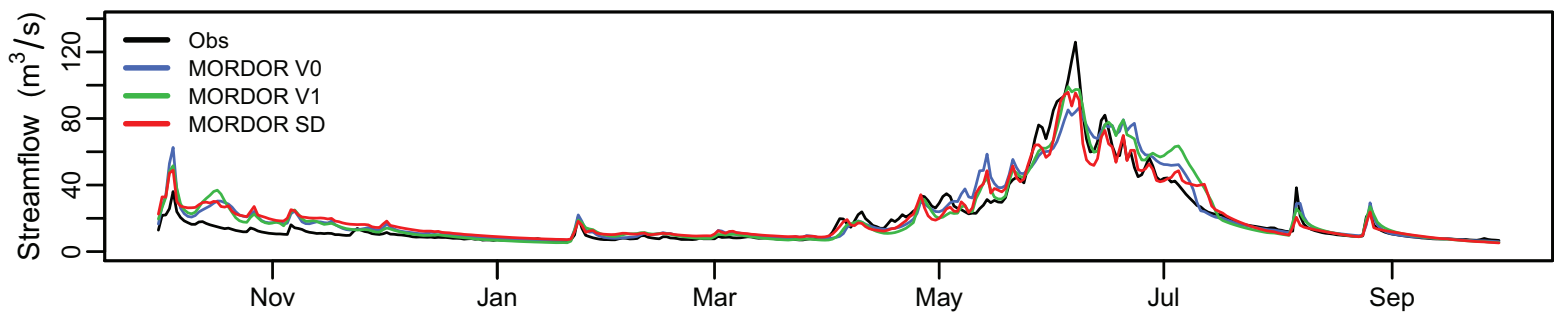

Year 1986

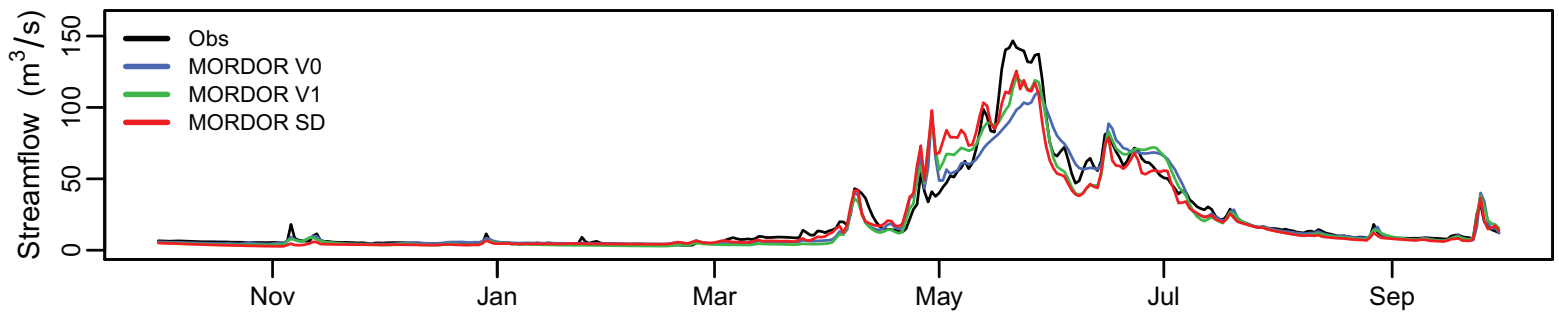

Year 1987

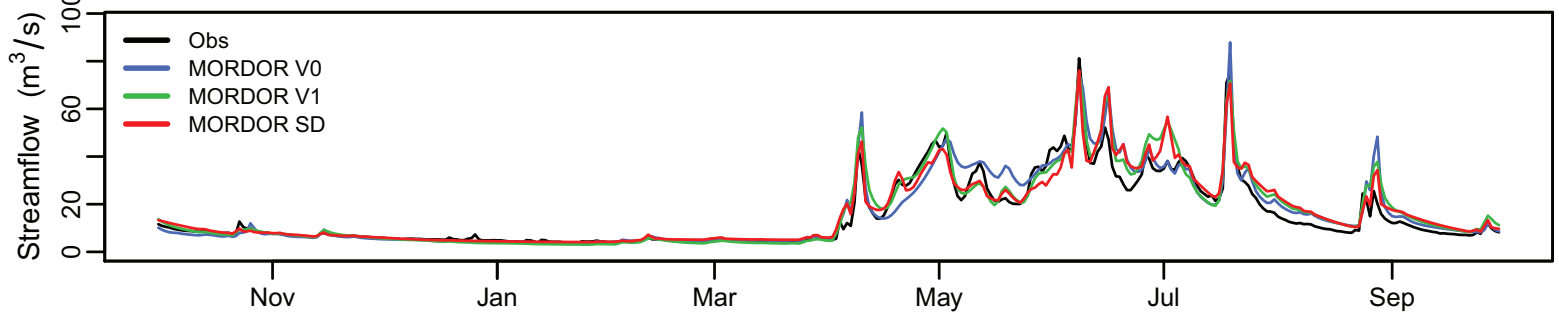

Year 1988

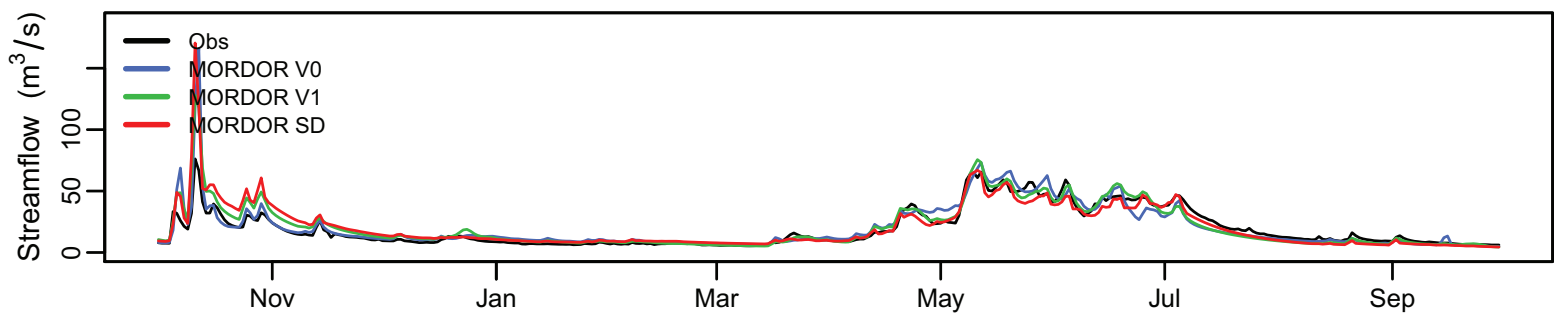

# Ubaye@RocheRousse

Year 1989

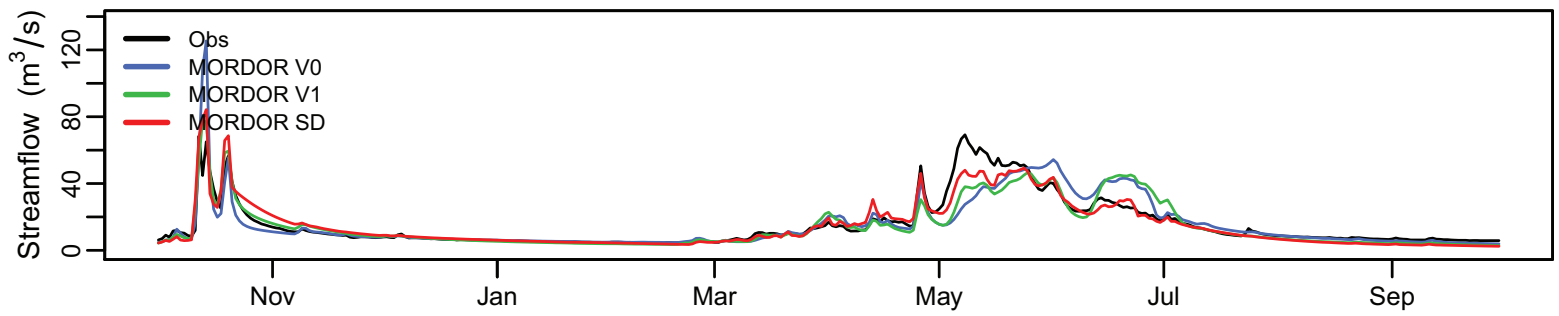

Year 1990

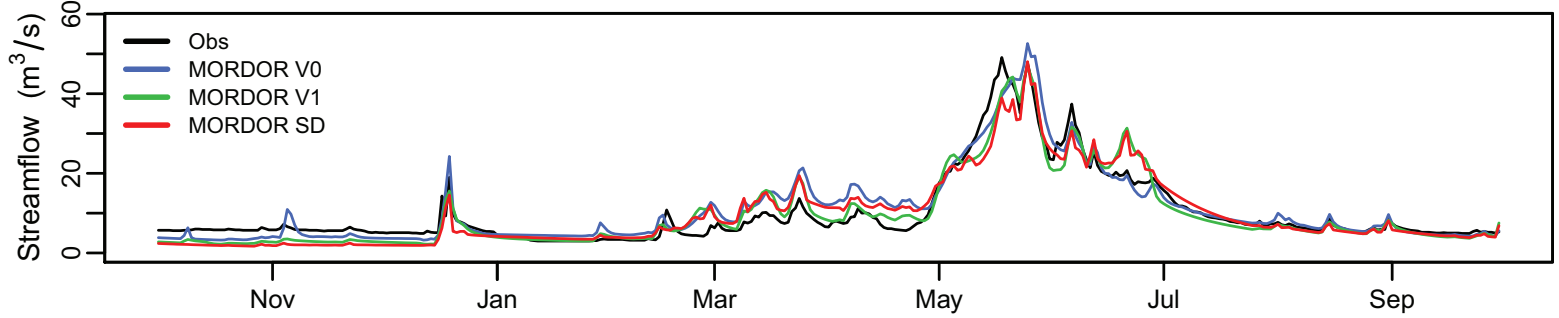

Year 1991

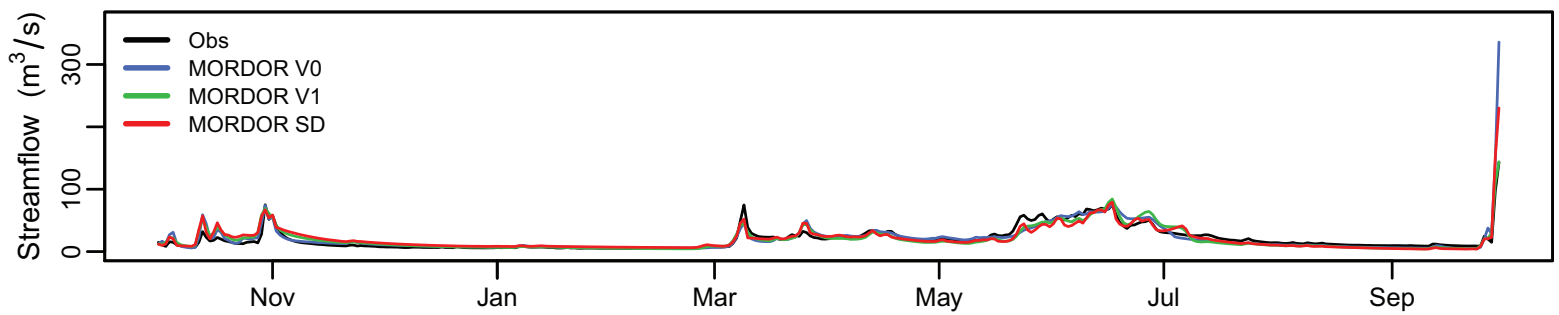

Year 1992

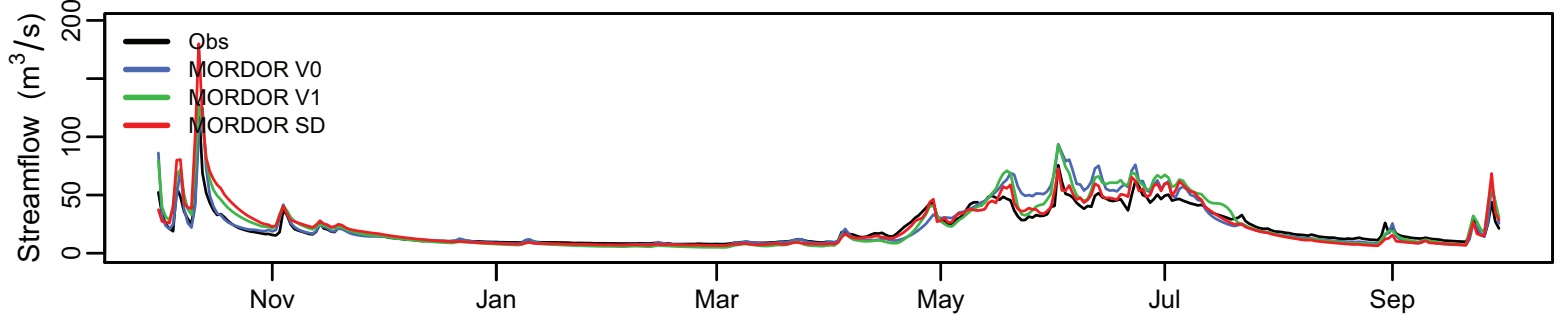

Year 1993

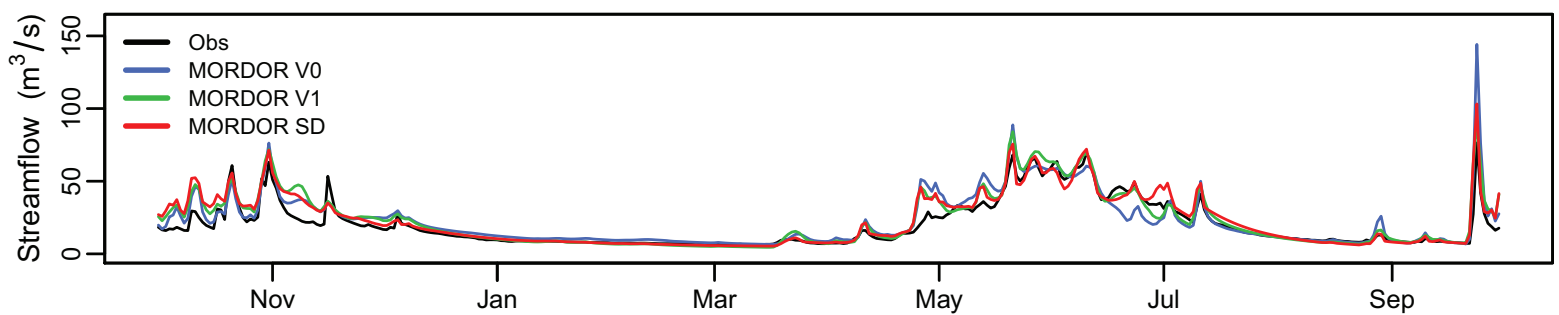

Year 1994

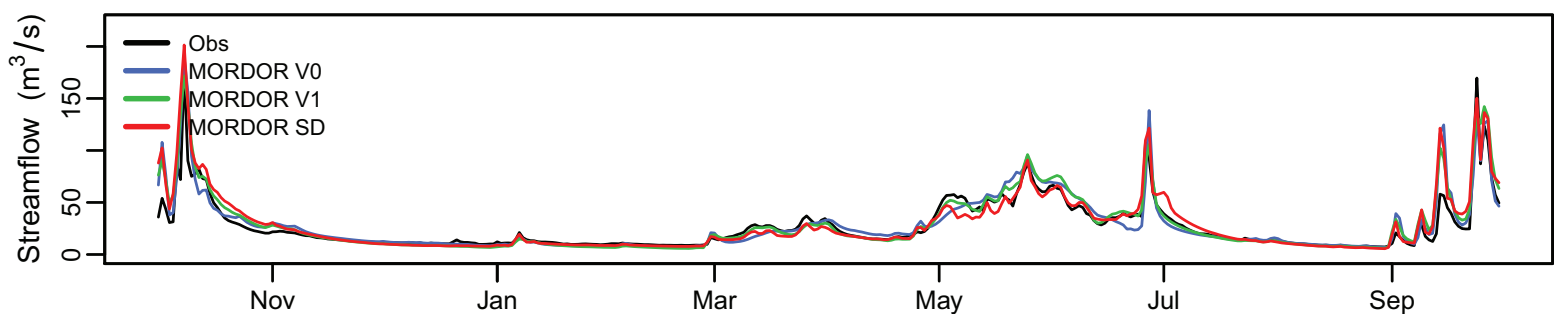

# Ubaye@RocheRousse

Year 1995

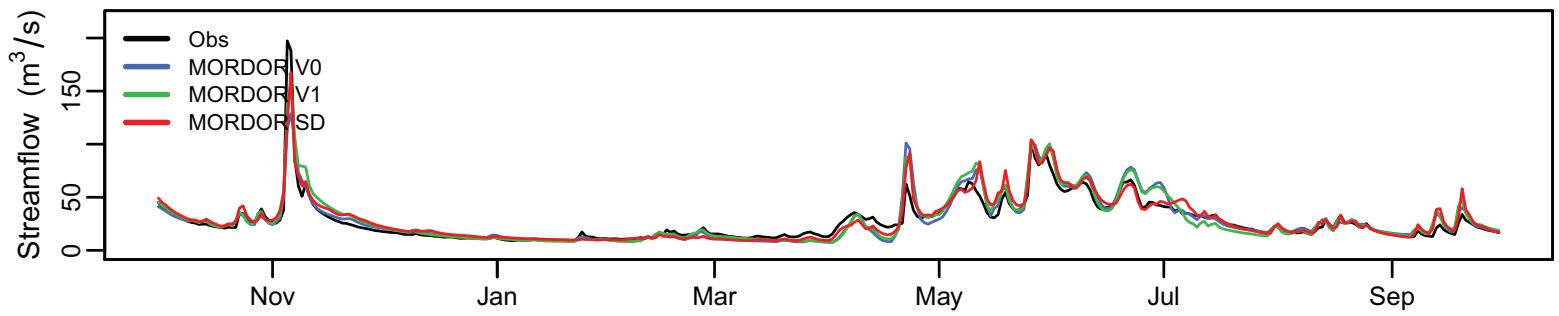

Year 1996

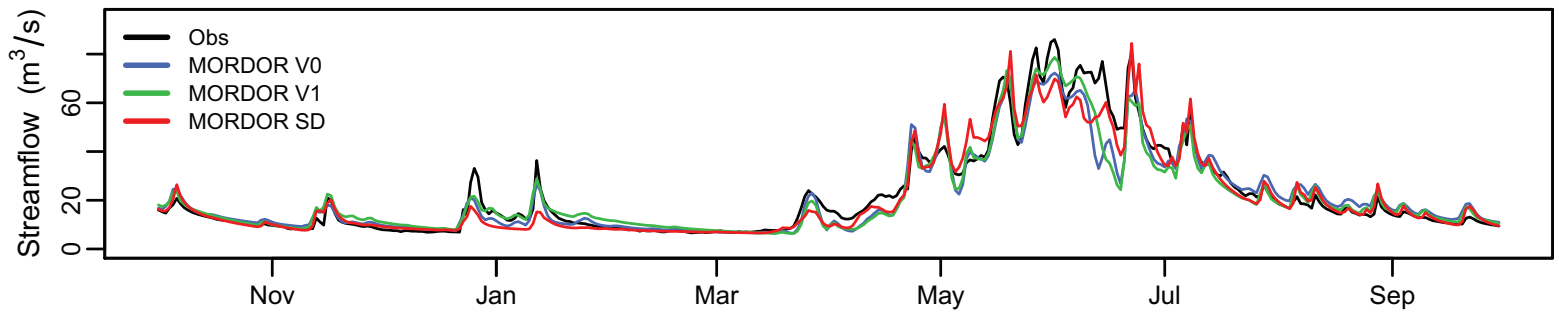

Year 1997

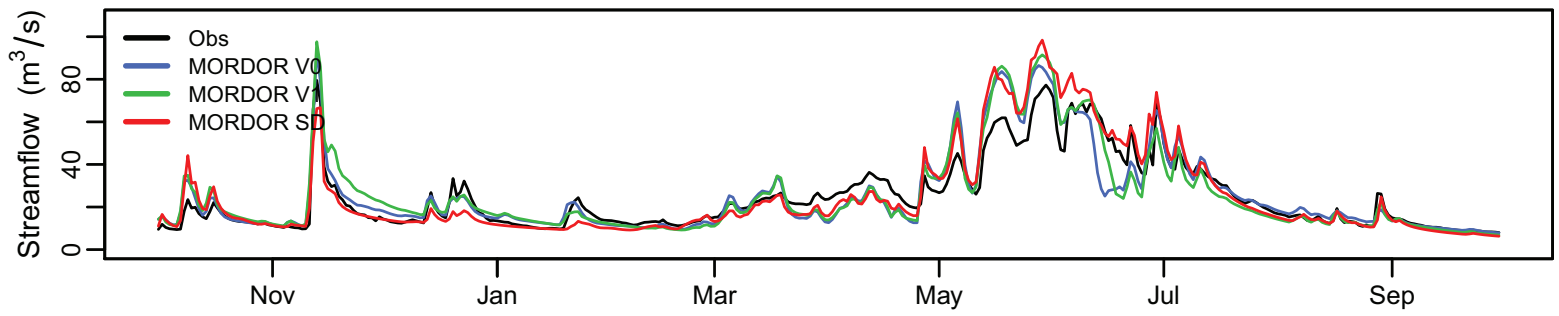

Year 1998

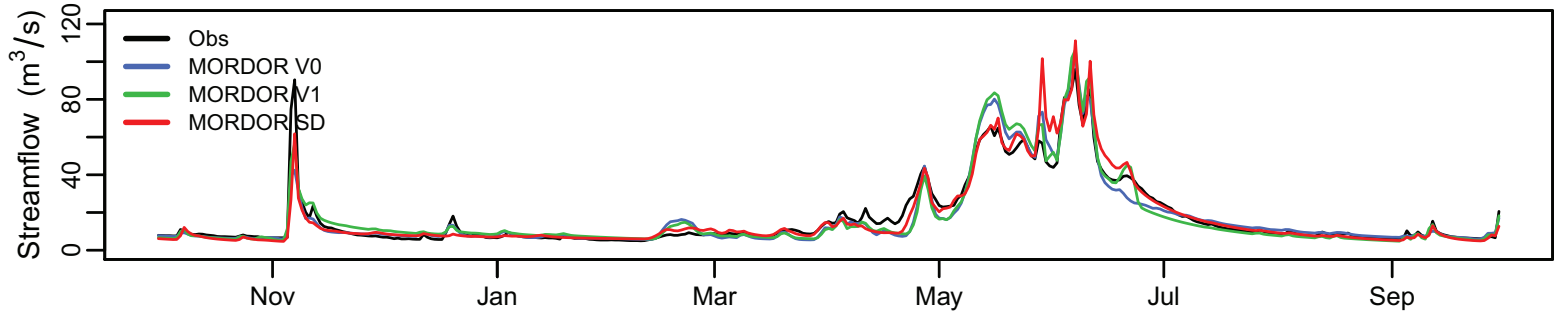

Year 1999

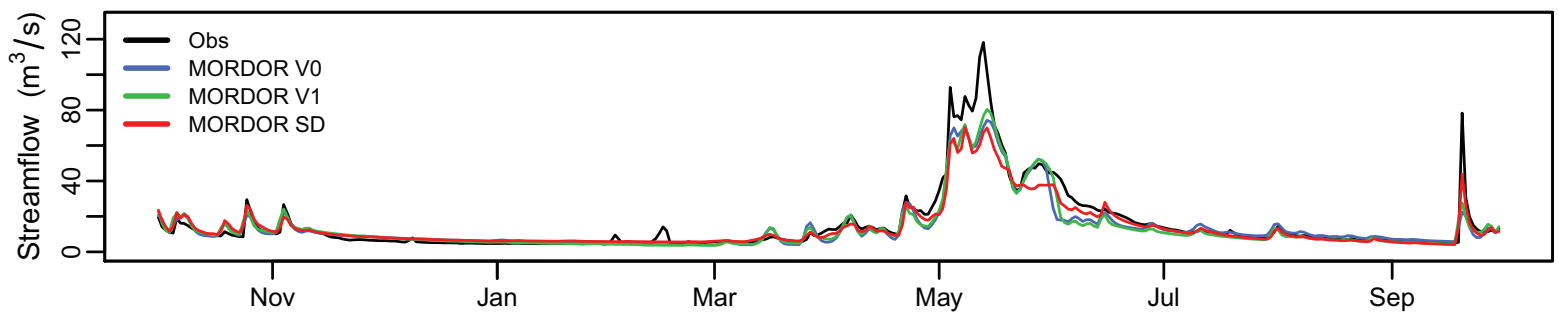

Year 2000

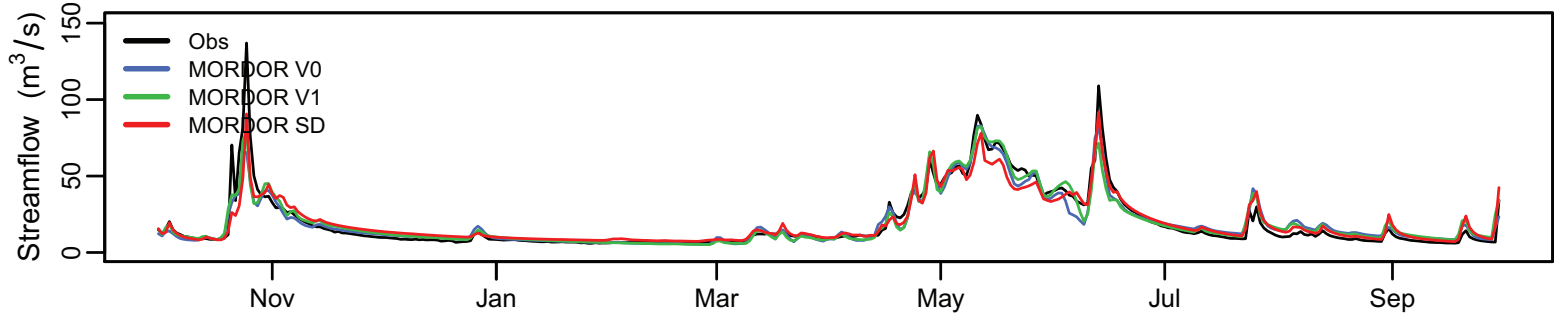

# Ubaye@RocheRousse

Year 2001

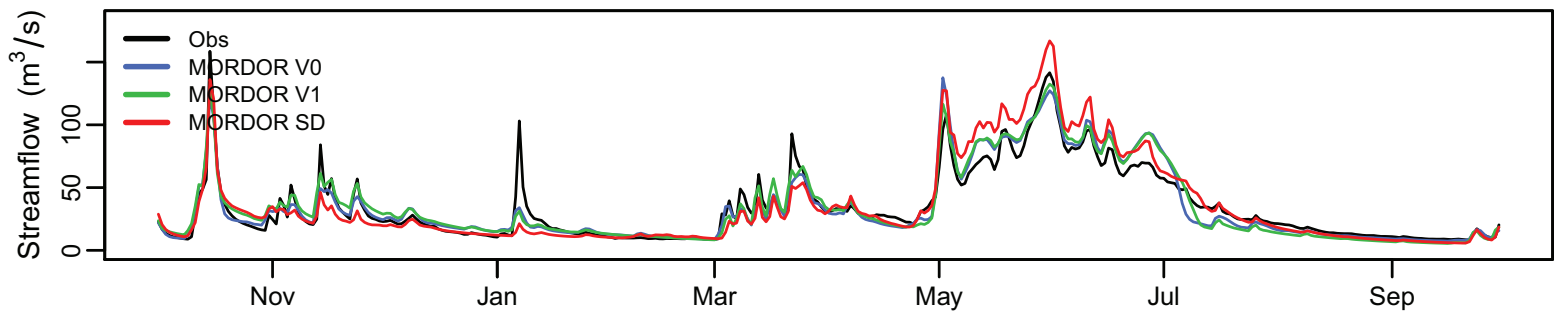

Year 2002

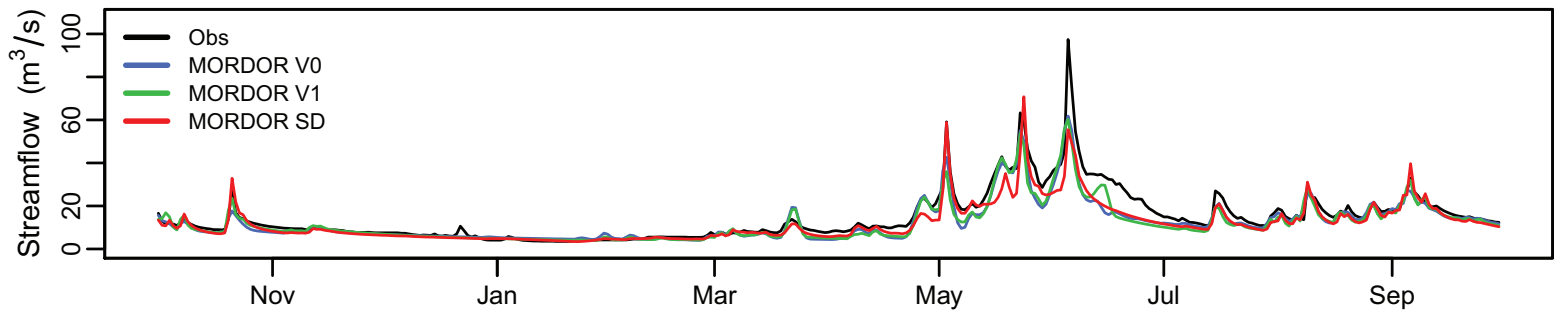

Year 2003

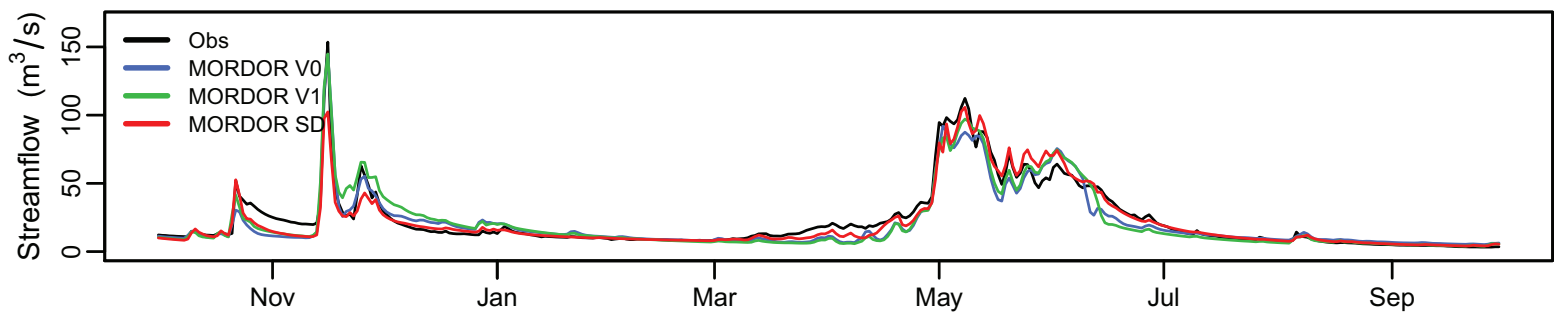

Year 2004

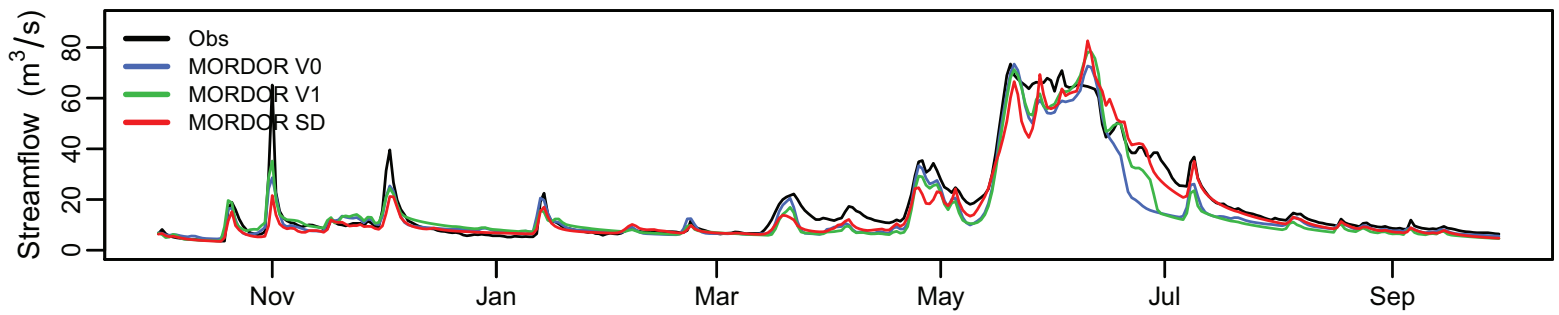

Year 2005

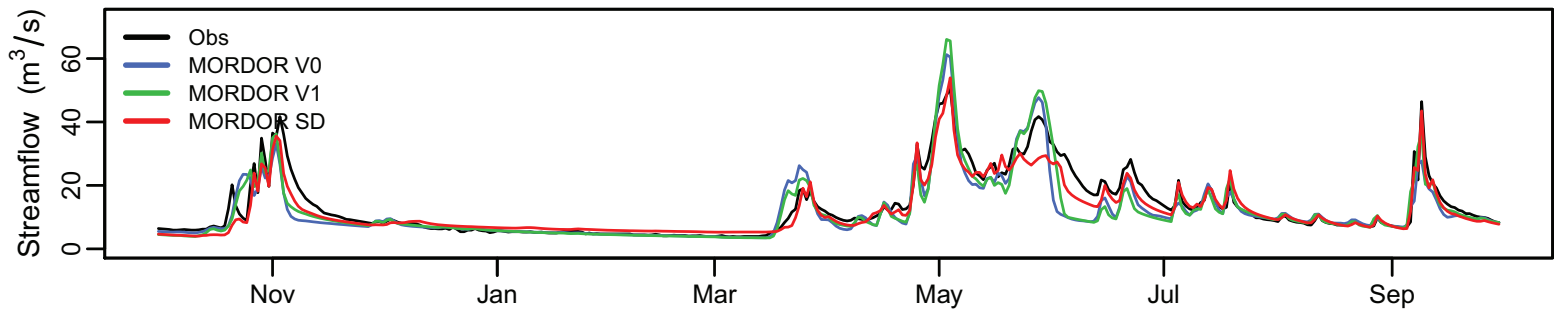



# Vence@Francheville

Year 1975

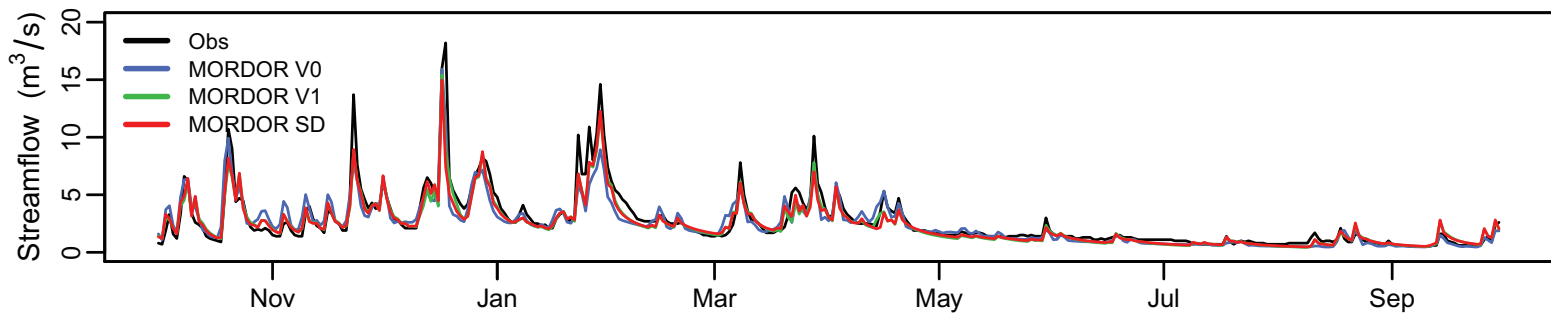

Year 1976

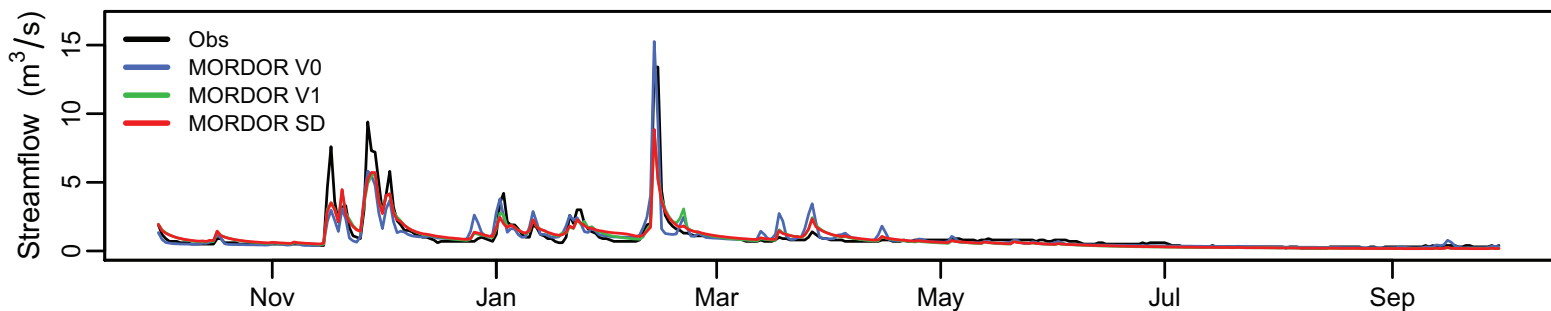

Year 1977

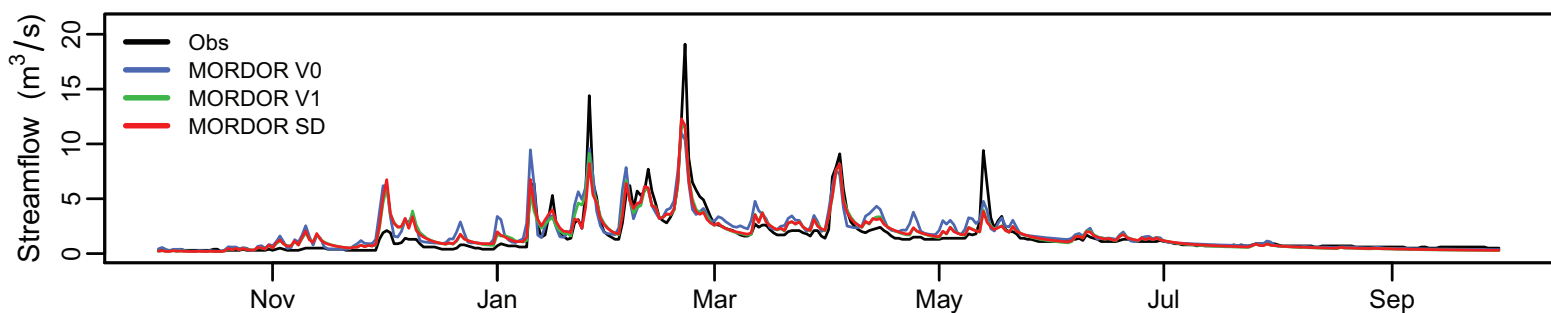

Year 1978

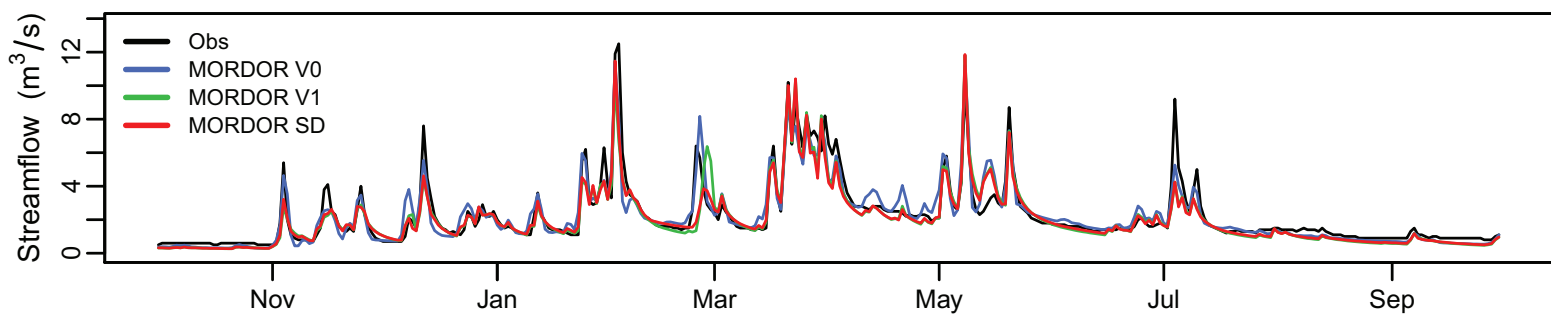

Year 1979

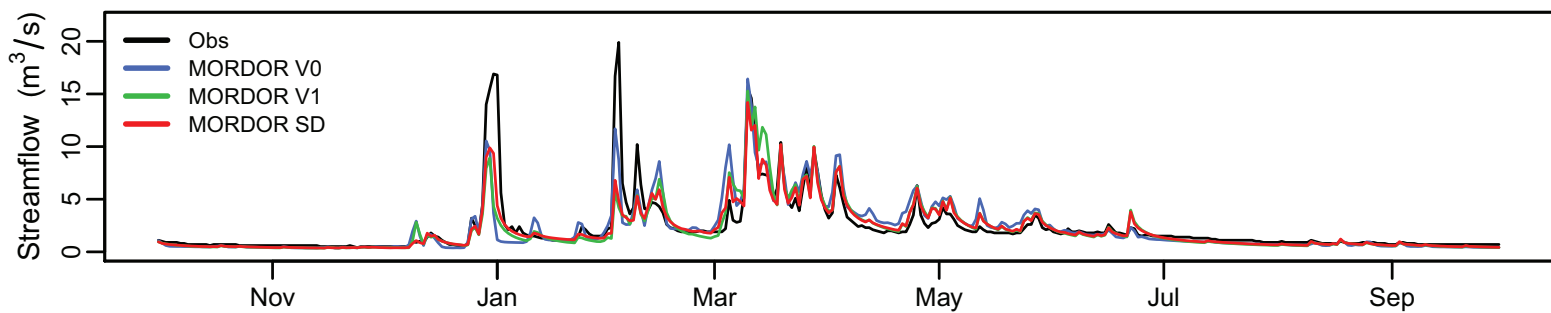

Year 1980

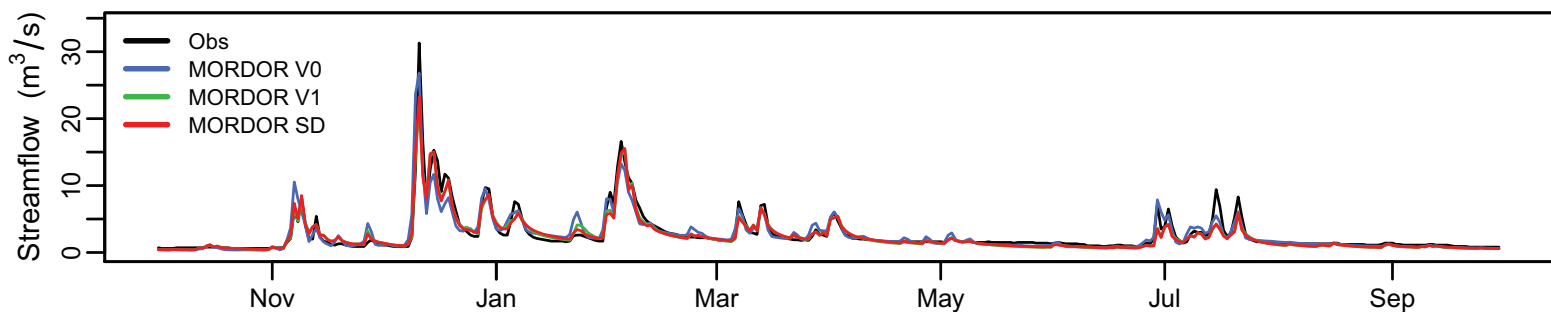

# Vence@Francheville

Year 1981

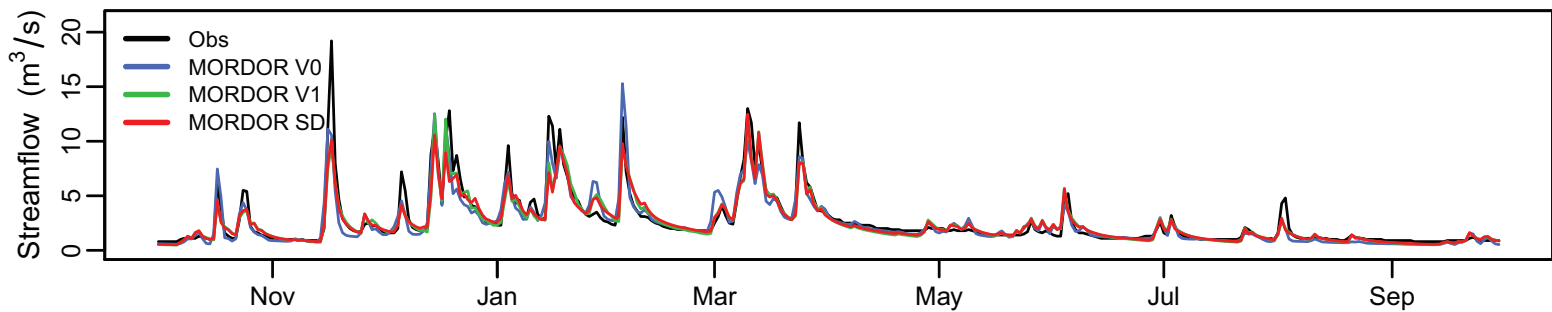

Year 1982

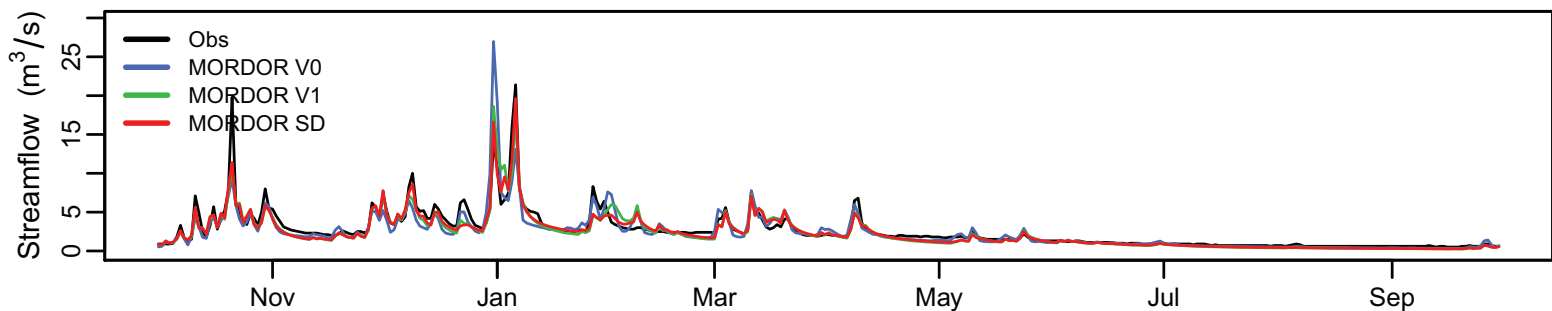

Year 1983

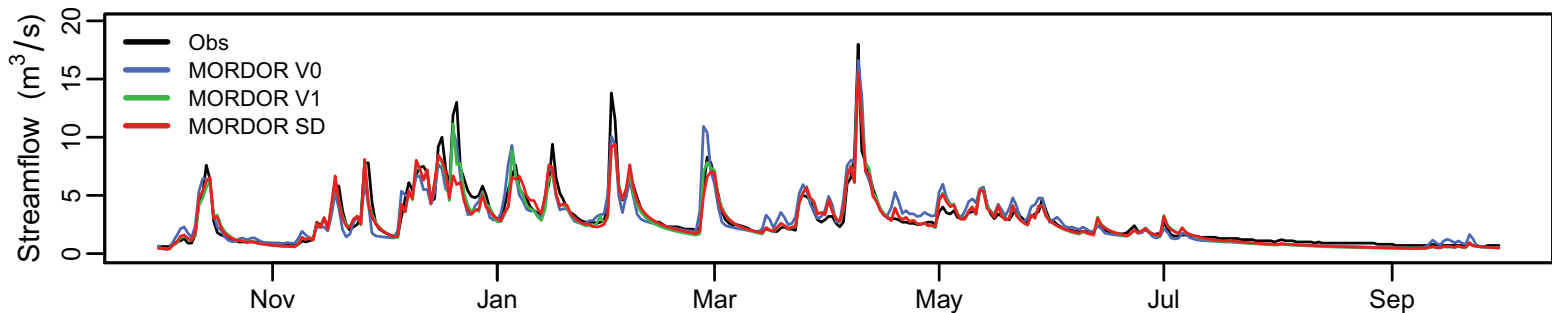

Year 1984

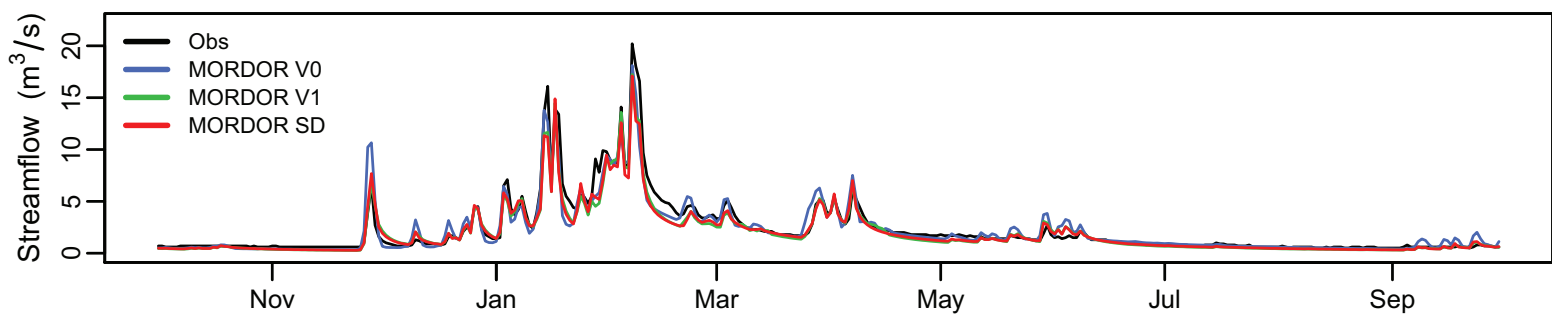

Year 1985

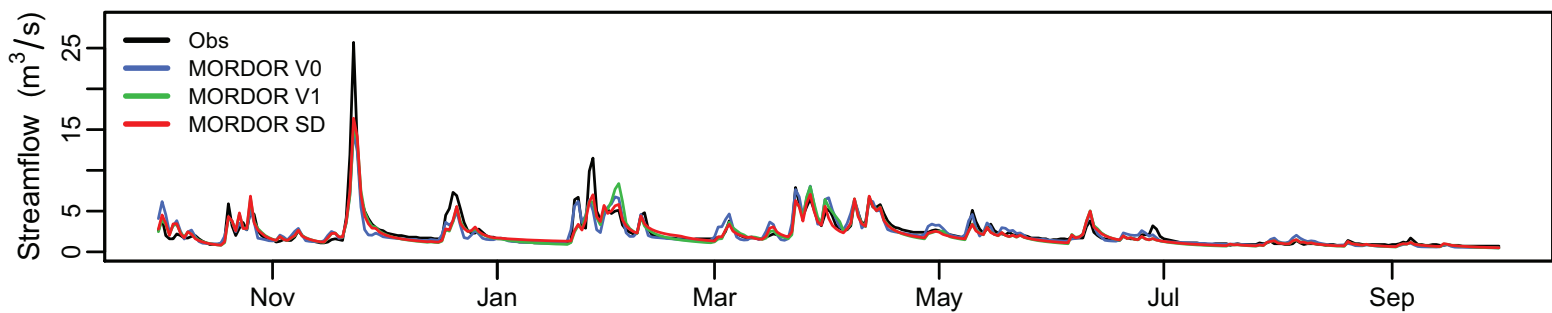

Year 1986

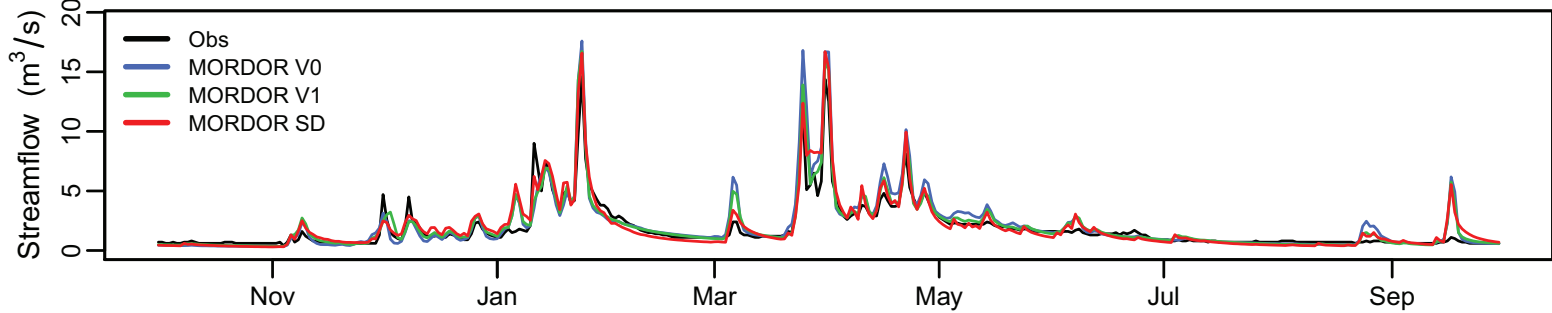

# Vence@Francheville

Year 1987

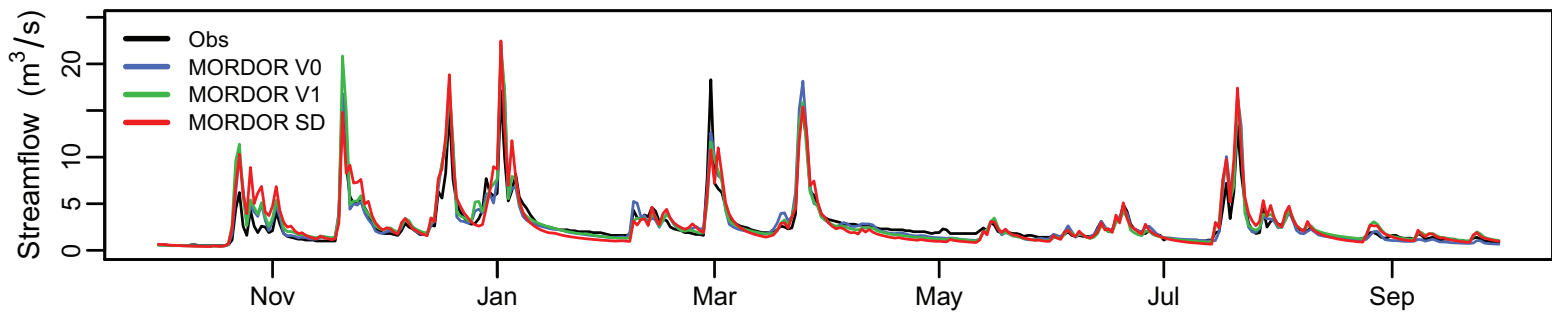

Year 1988

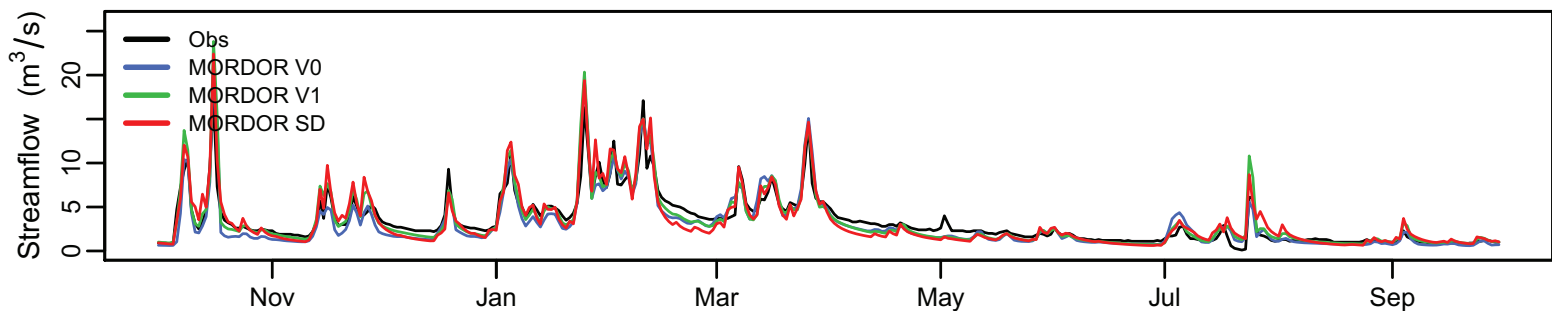

Year 1989

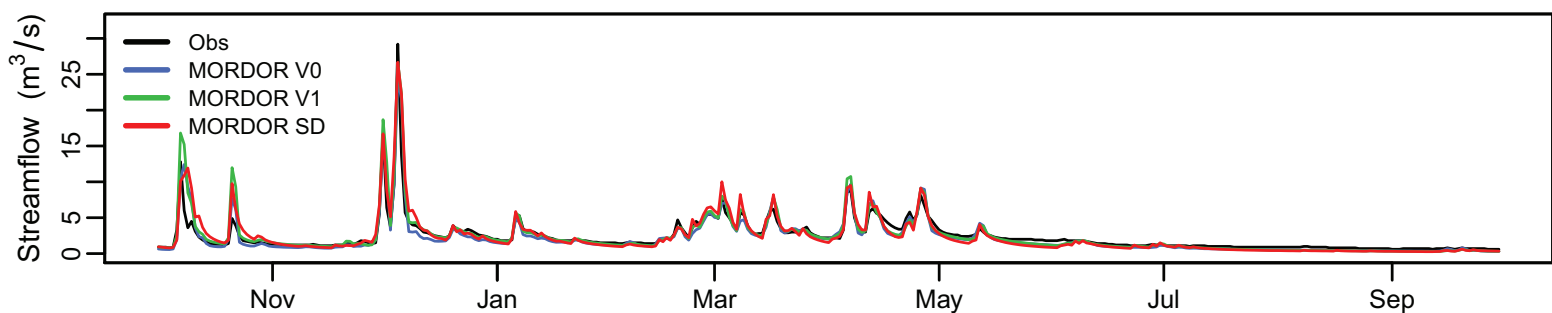

Year 1990

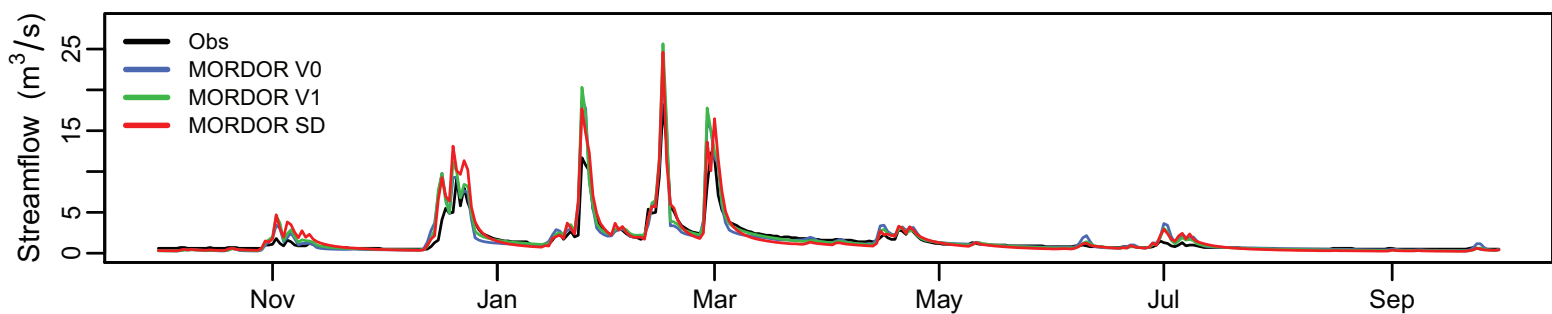

Year 1991

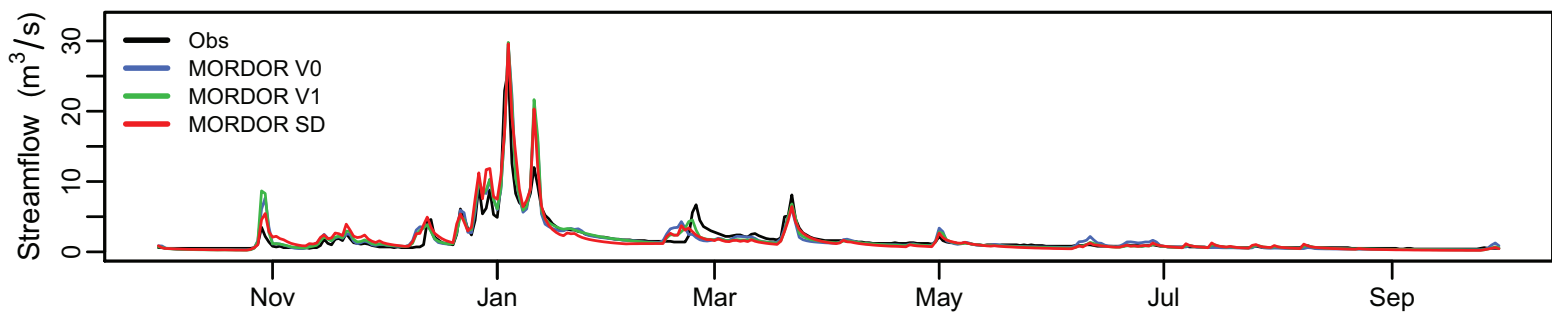

Year 1992

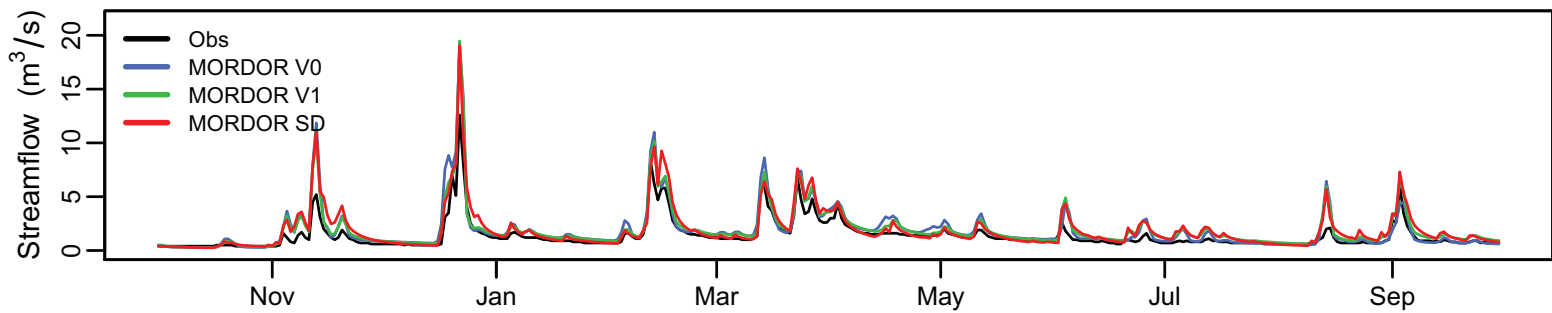

# Vence@Francheville

Year 1993

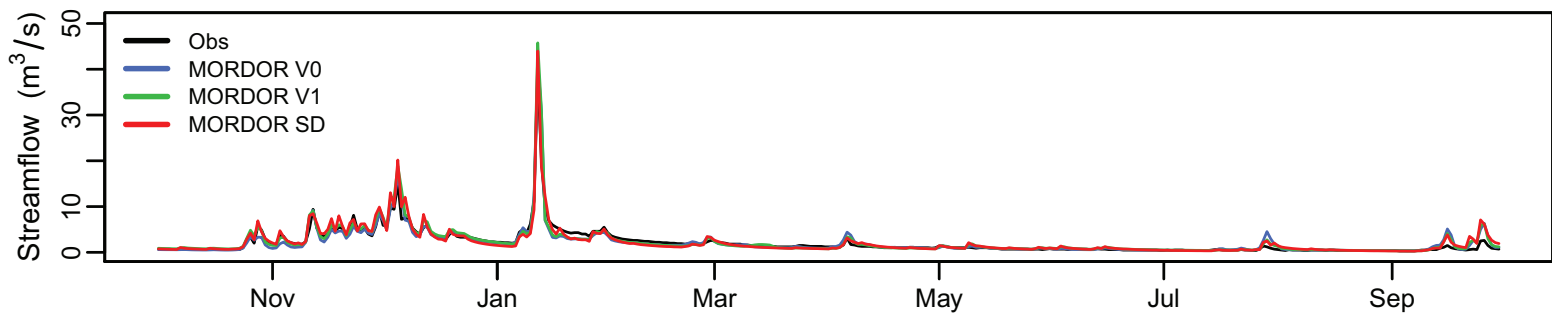

Year 1994

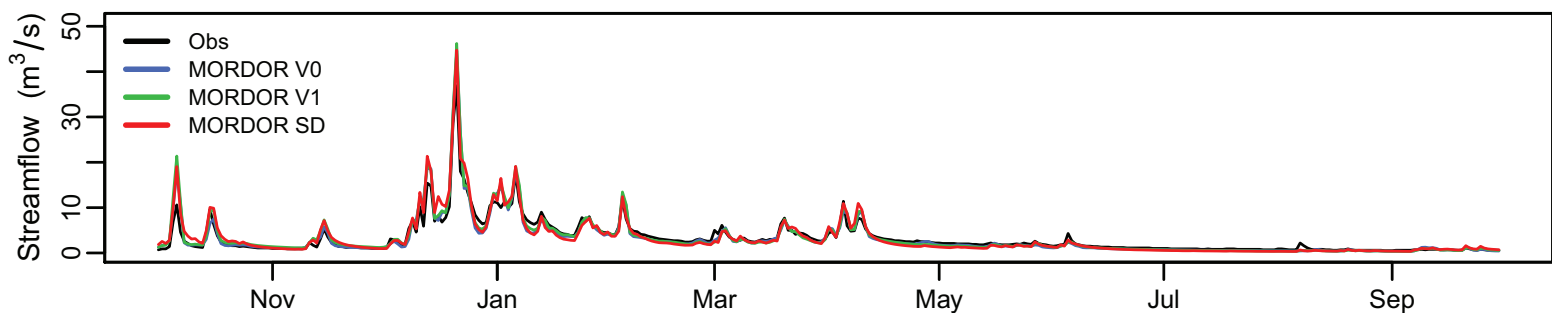

Year 1995

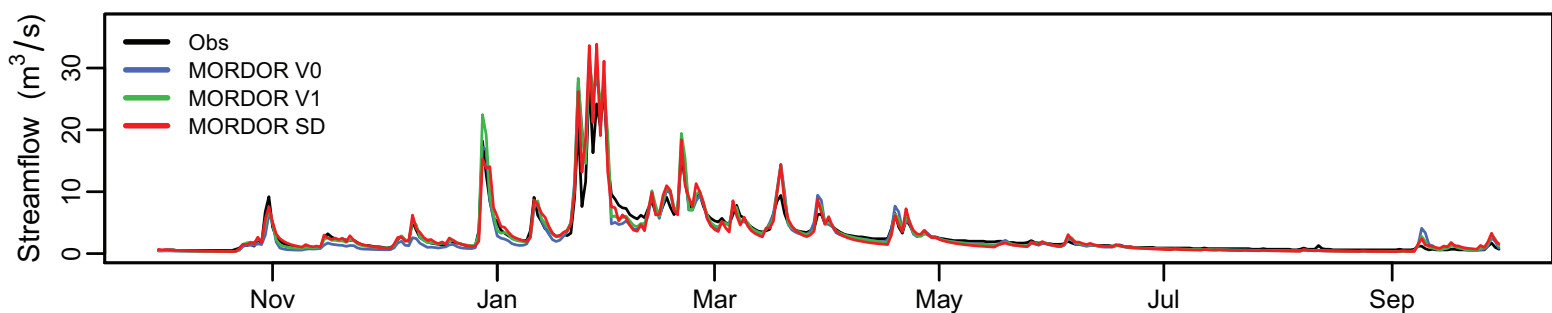

# Vienne@Bussy

Year 1984

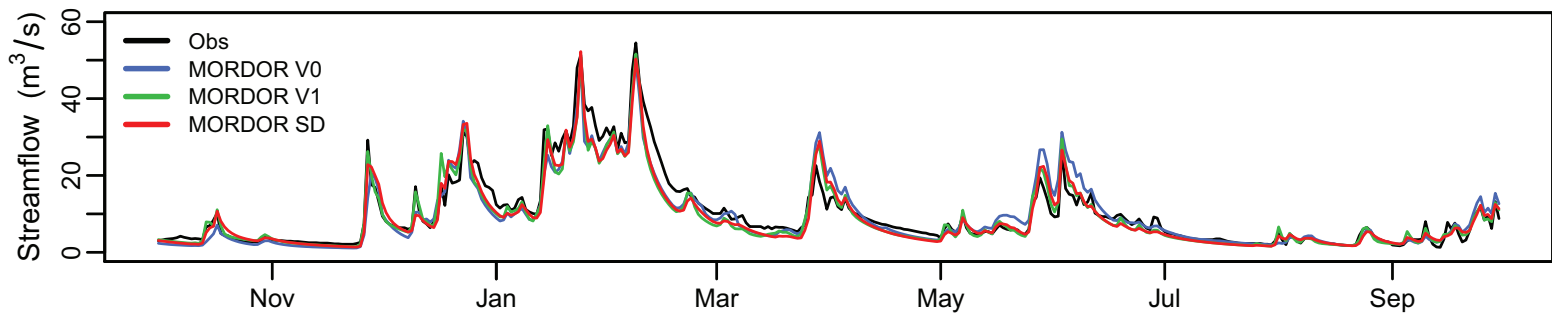

Year 1985

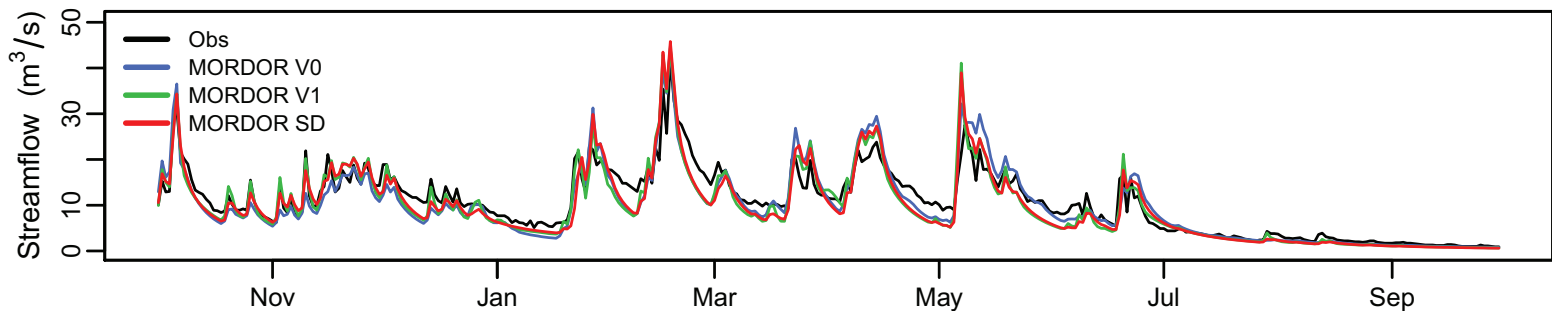

Year 1986

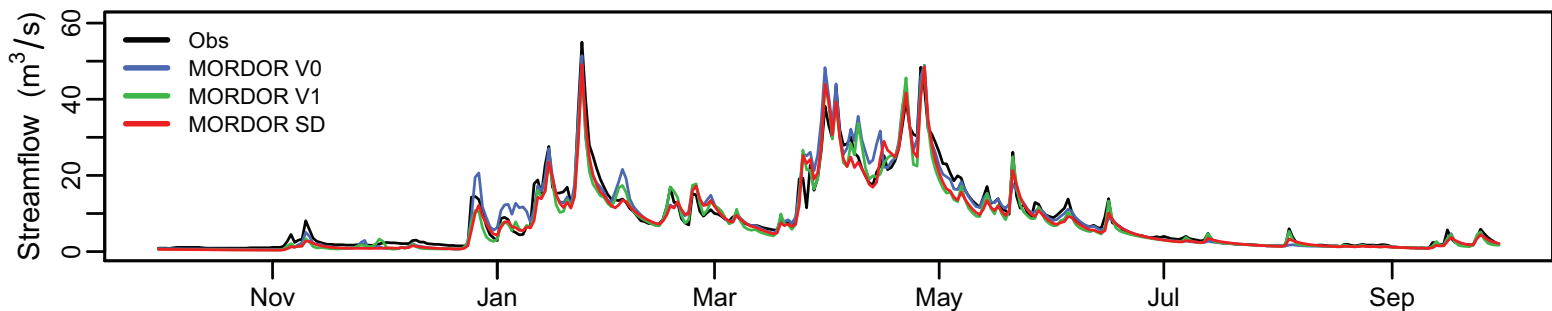

Year 1987

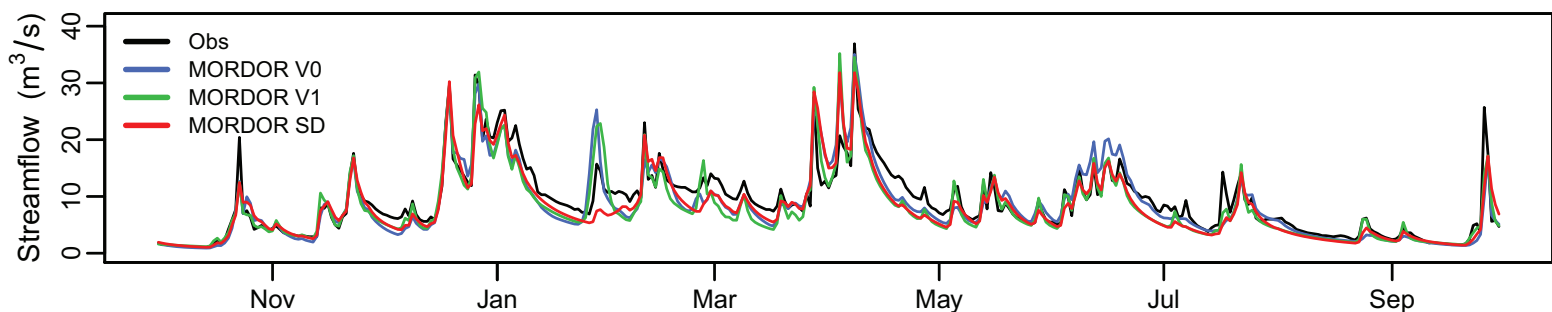

Year 1988

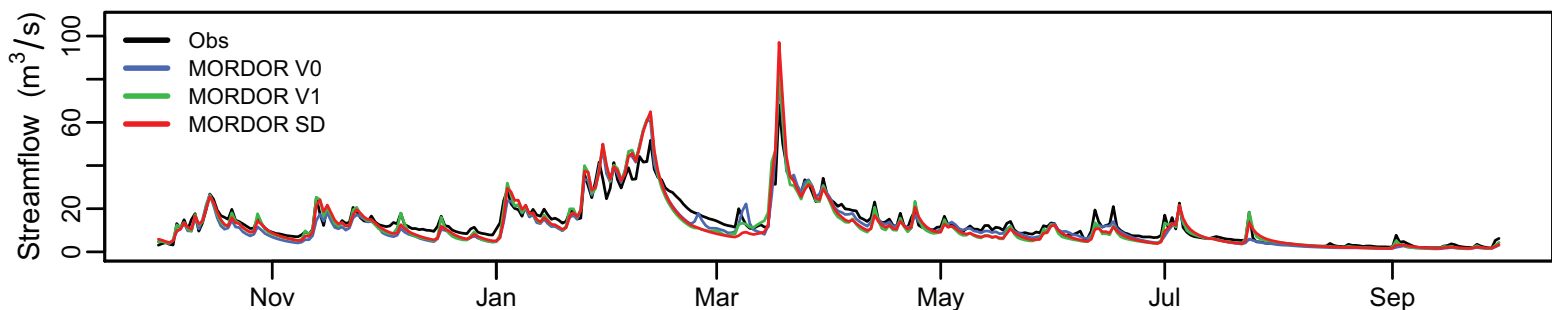

Year 1989

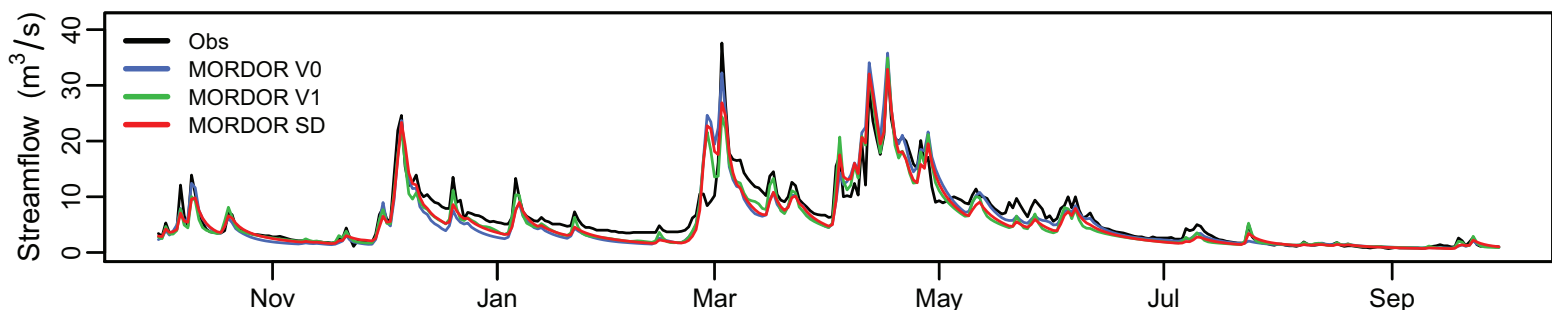

# Vienne@Bussy

Year 1990

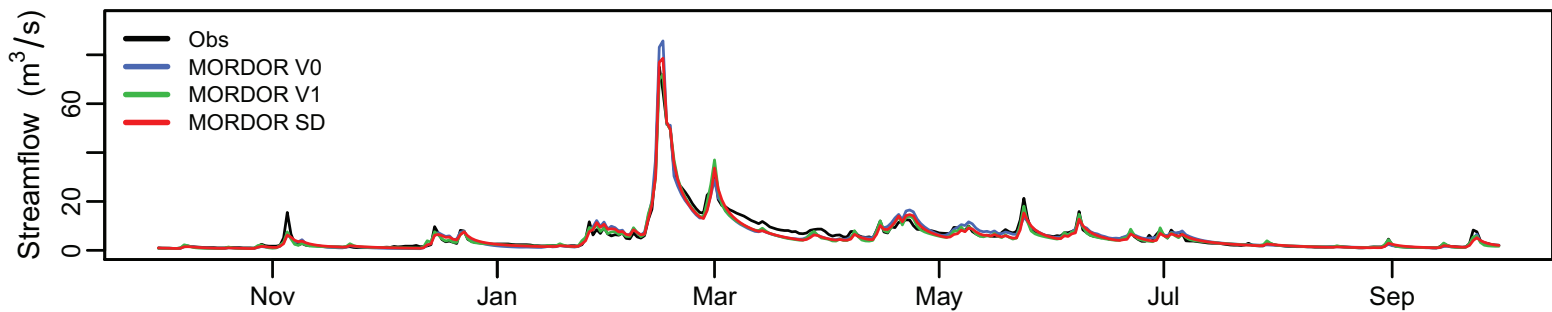

Year 1991

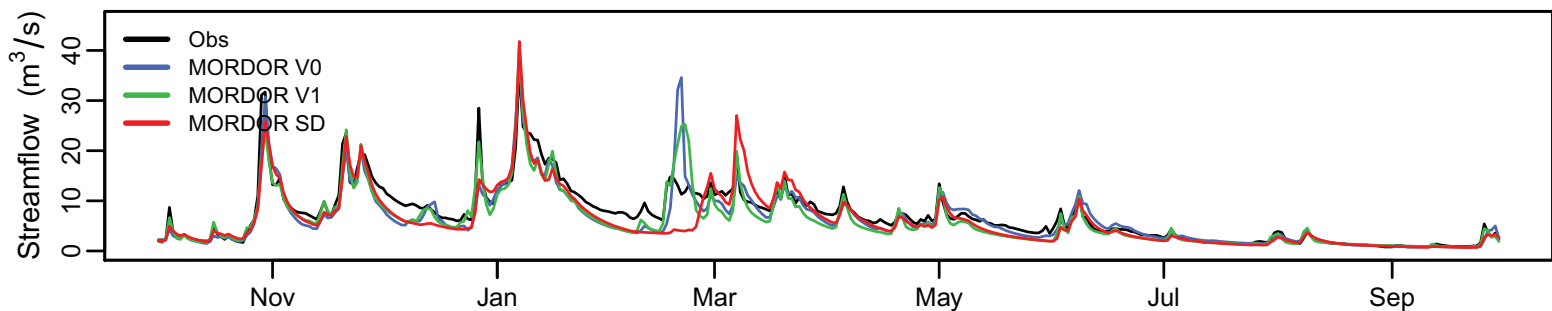

Year 1992

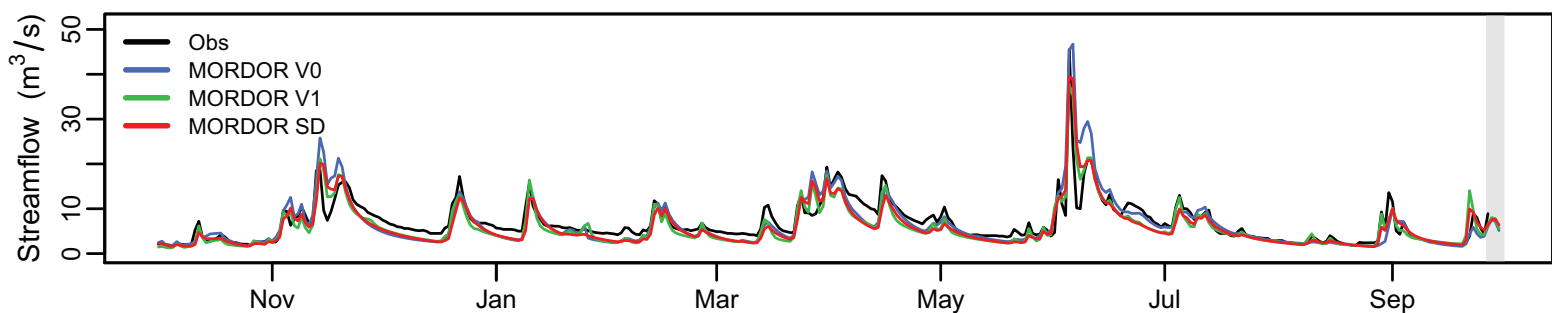

Year 1993

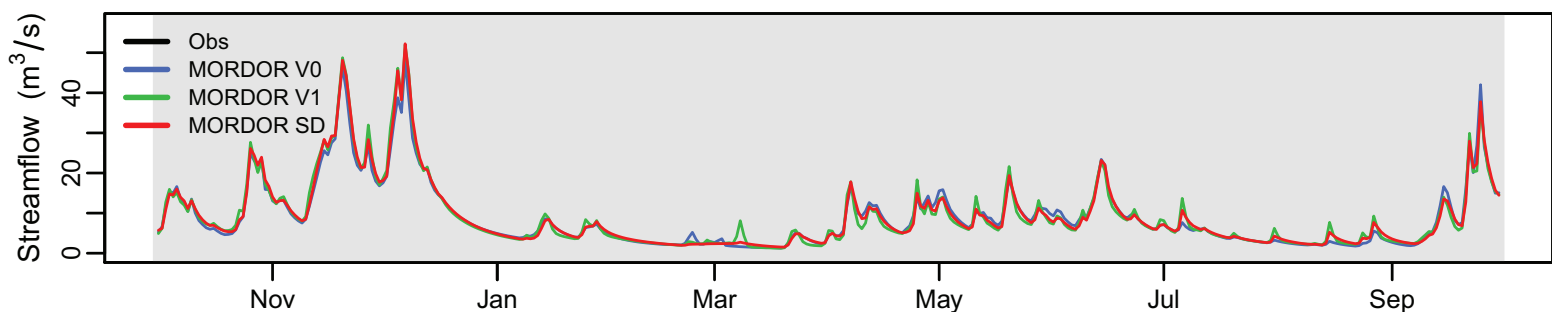

Year 1994

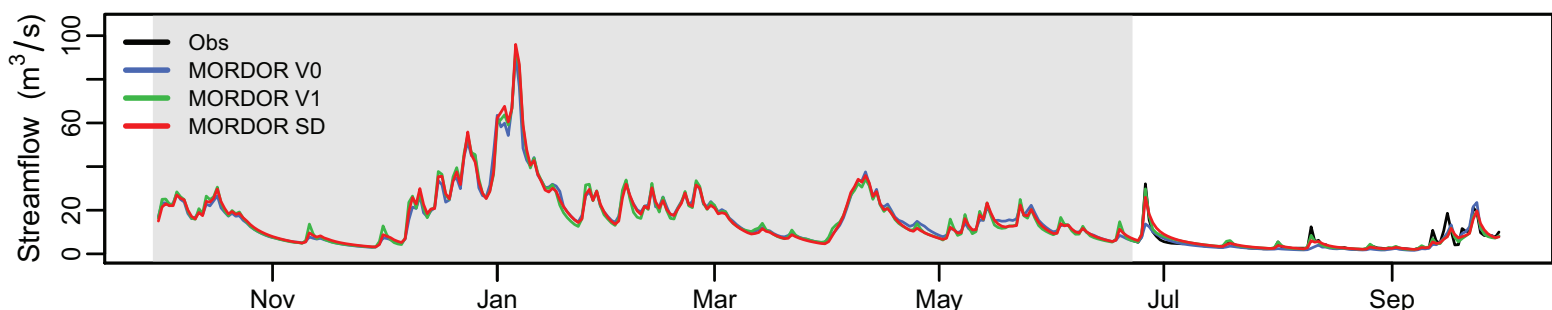

Year 1995

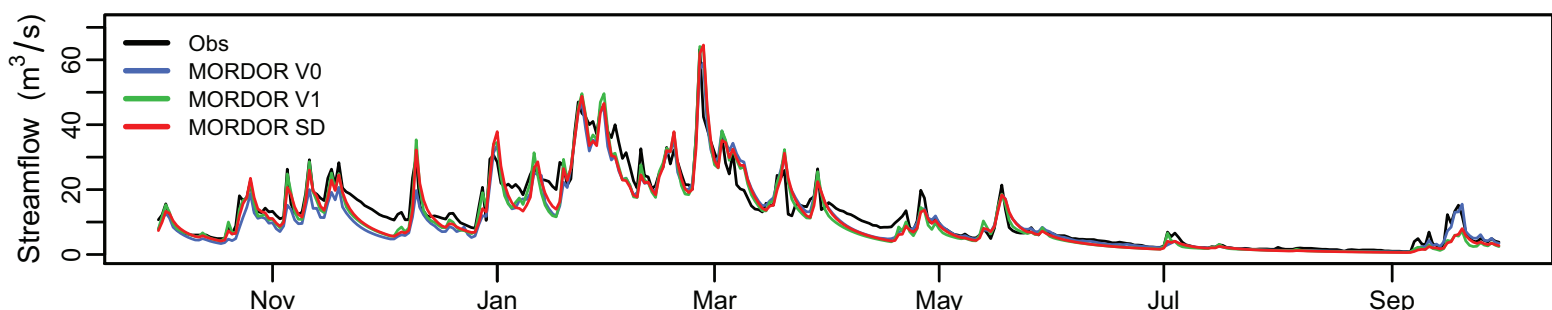

# Vienne@Bussy

Year 1996

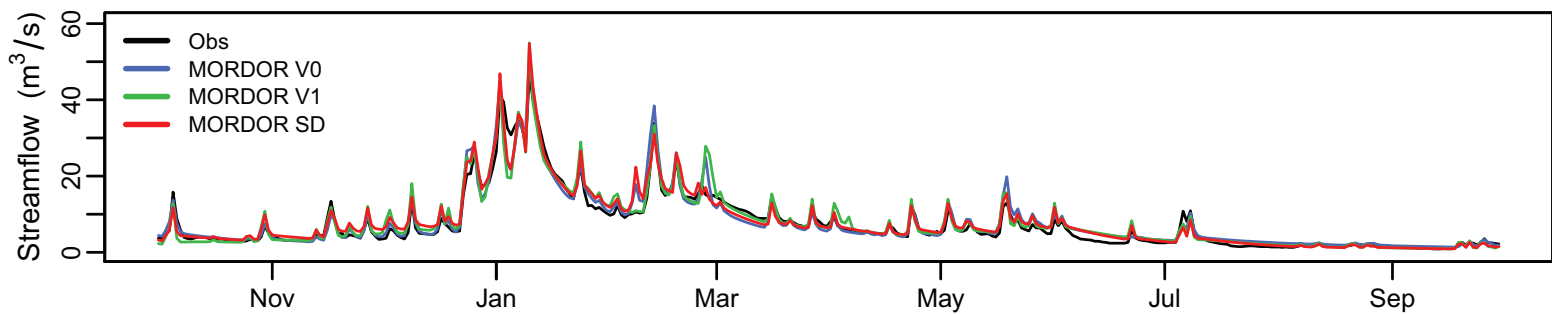

Year 1997

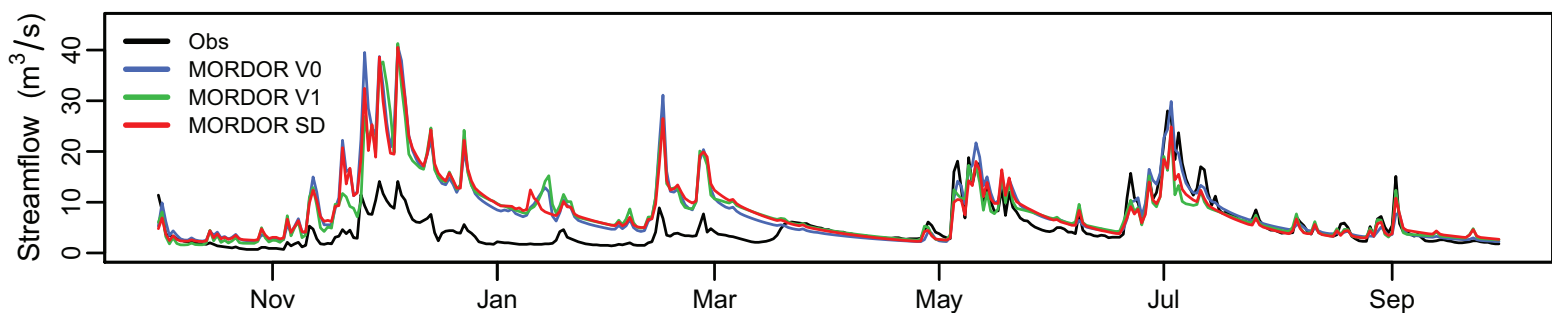

Year 1998

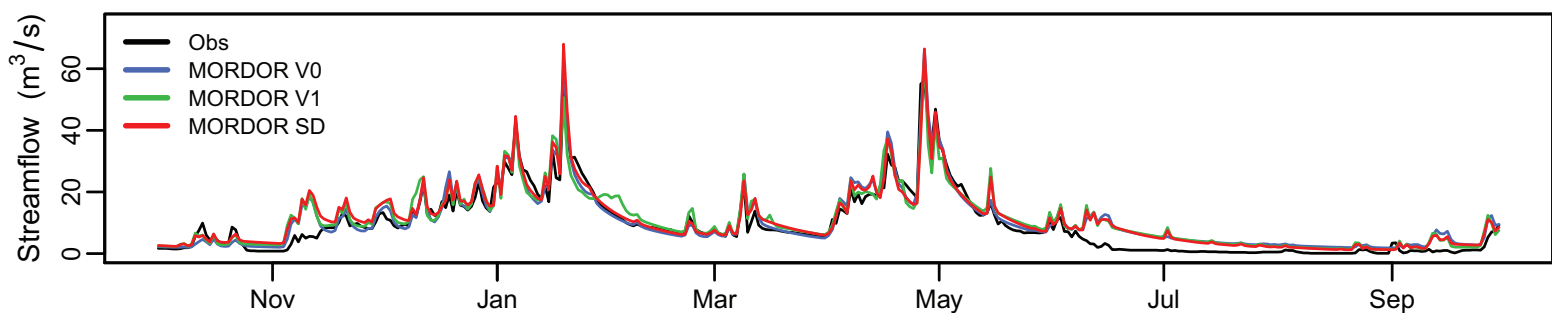

Year 1999

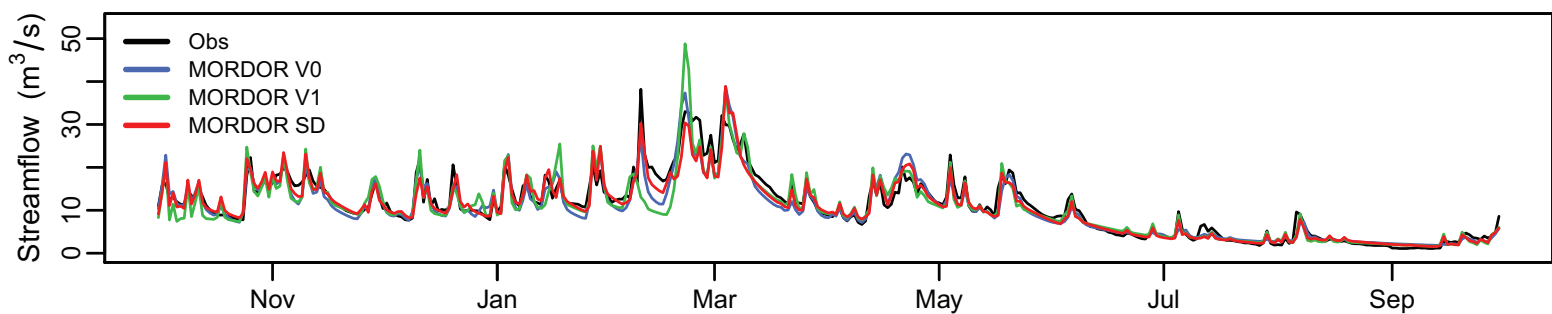

Year 2000

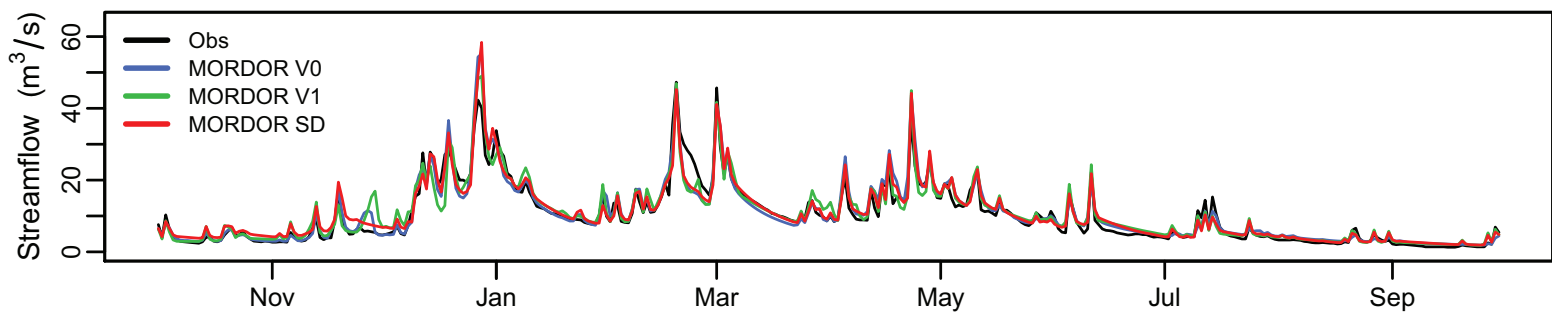

Year 2001

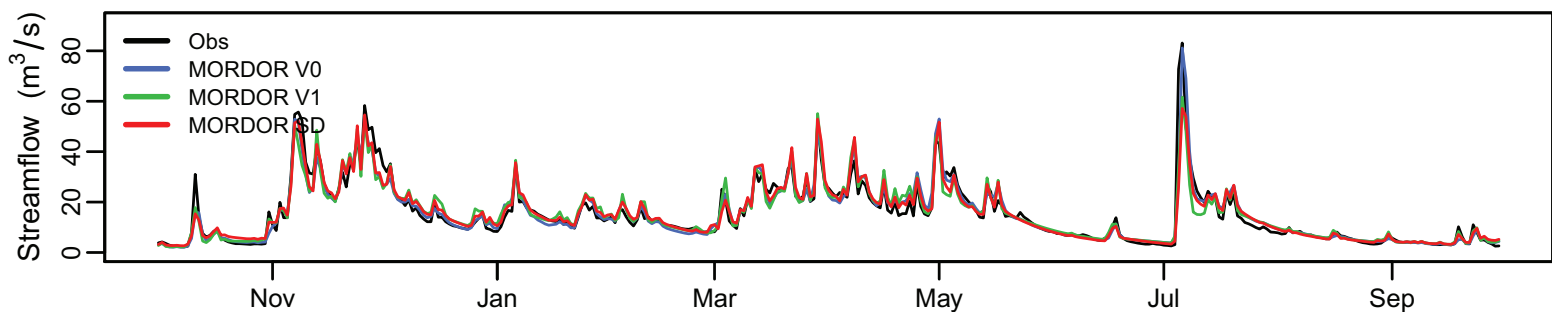

# Vienne@Bussy

Year 2002

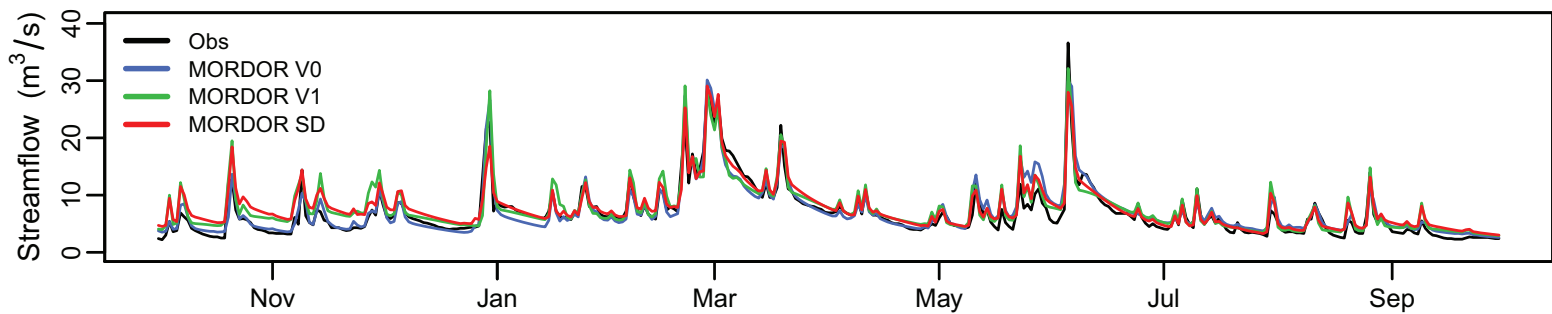

Year 2003

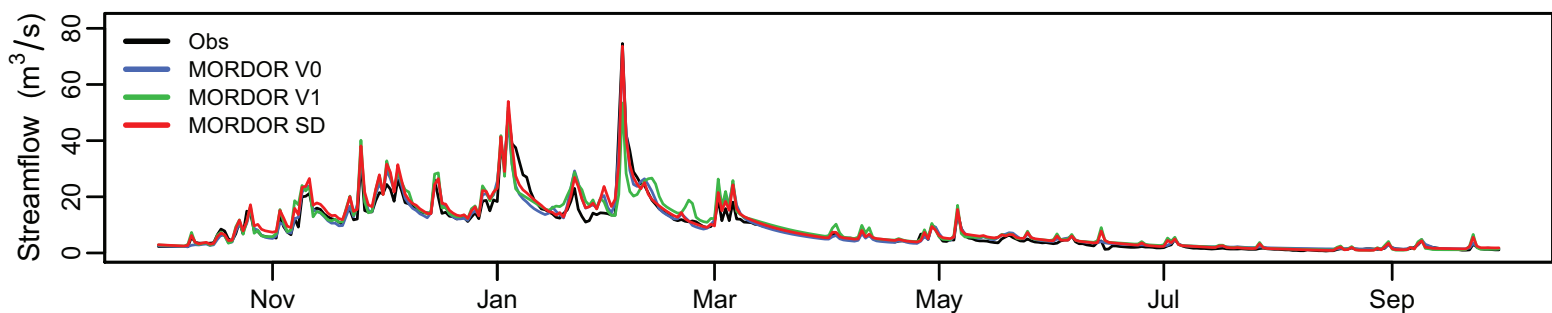

Year 2004

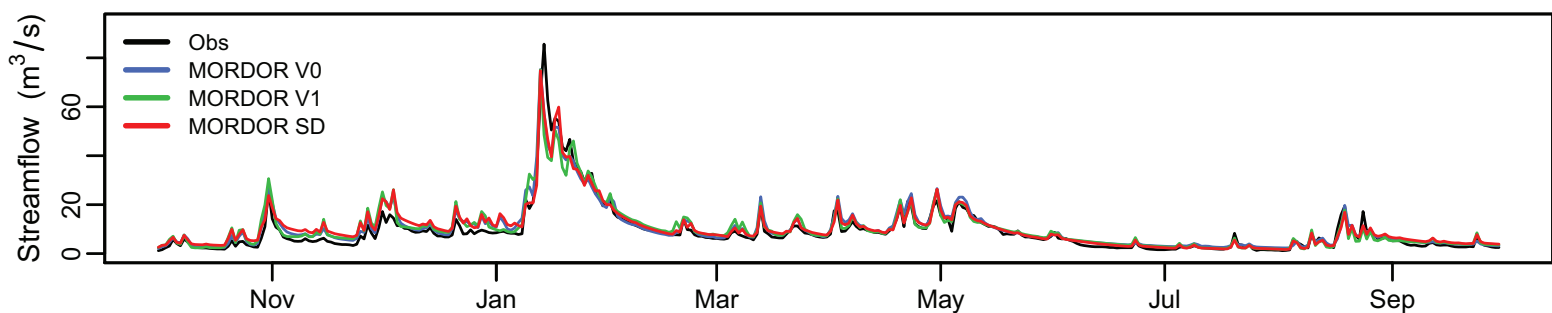

Year 2005

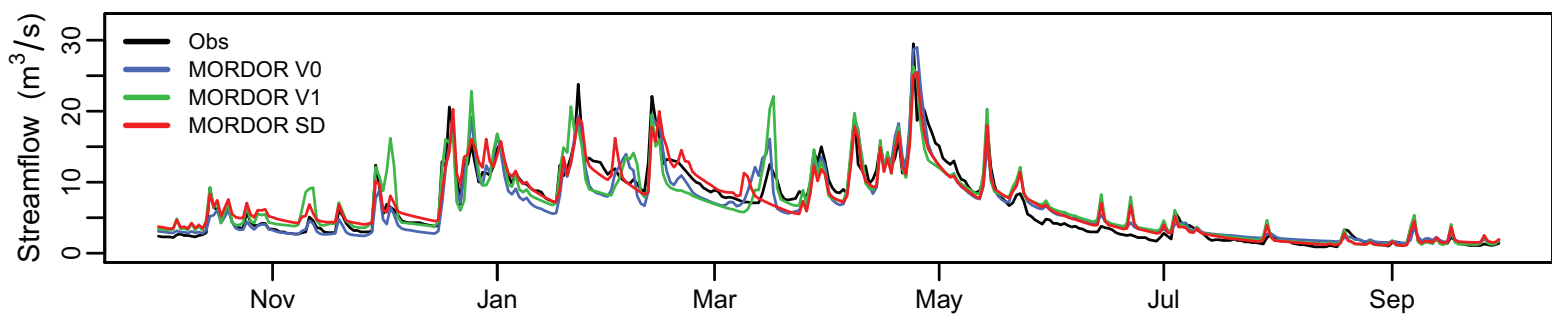

Year 2006

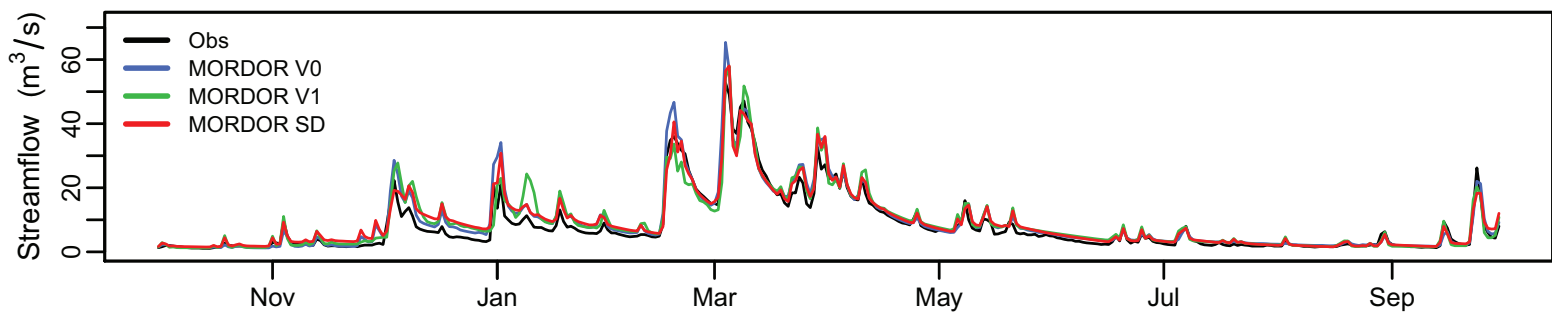

Supplement: Supplementary file [file hess-2017-82-AC1-supplement.pdf]
